# Supplementary material for: The future burden of obesity-related diseases in the 53 WHO European-Region countries and the impact of effective interventions: a modelling study
Source: PubMed Central journal article supplement — BMJ Open. 2014 Jul 25;4(7):e004787. doi: 10.1136/bmjopen-2014-004787 (PMC4120328; doi:10.1136/bmjopen-2014-004787), 2014-07-25
Supplement: bmjopen-2014-004787.draft_revisions.pdf [file bmjopen-2014-004787.draft_revisions.pdf]

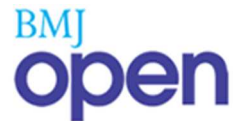

**The future burden of obesity-related diseases in the 53 WHO European-Region countries and the impact of effective interventions: A modelling study**

|                                 |                                                                                                                                                                                                                                                                                                                                                                                                                                         |
|---------------------------------|-----------------------------------------------------------------------------------------------------------------------------------------------------------------------------------------------------------------------------------------------------------------------------------------------------------------------------------------------------------------------------------------------------------------------------------------|
| Journal:                        | <i>BMJ Open</i>                                                                                                                                                                                                                                                                                                                                                                                                                         |
| Manuscript ID:                  | bmjopen-2014-004787                                                                                                                                                                                                                                                                                                                                                                                                                     |
| Article Type:                   | Research                                                                                                                                                                                                                                                                                                                                                                                                                                |
| Date Submitted by the Author:   | 03-Jan-2014                                                                                                                                                                                                                                                                                                                                                                                                                             |
| Complete List of Authors:       | Webber, Laura; UK Health Forum, Modelling<br>Divajeva, Diana; UK Health Forum, Modelling<br>Marsh, Tim; UK Health Forum, Modelling<br>McPherson, Klim; New College, University of Oxford<br>Brown, Martin; UK Health Forum, Modelling<br>Galea, Gauden; World Health Organization, Division of Noncommunicable Diseases and Life-course<br>Breda, Joao; World Health Organization, Division of Noncommunicable Diseases and Life-course |
| <b>Primary Subject Heading</b>: | Public health                                                                                                                                                                                                                                                                                                                                                                                                                           |
| Secondary Subject Heading:      | Epidemiology, Global health, Nutrition and metabolism, Research methods                                                                                                                                                                                                                                                                                                                                                                 |
| Keywords:                       | Coronary heart disease < CARDIOLOGY, EPIDEMIOLOGY, NUTRITION & DIETETICS, PUBLIC HEALTH, STATISTICS & RESEARCH METHODS                                                                                                                                                                                                                                                                                                                  |
|                                 |                                                                                                                                                                                                                                                                                                                                                                                                                                         |

SCHOLARONE™  
Manuscripts

only

1  
2  
3  
4  
5  
6  
7  
8  
9  
10  
11  
12  
13  
14  
15  
16  
17  
18  
19  
20  
21  
22  
23  
24  
25  
26  
27  
28  
29  
30  
31  
32  
33  
34  
35  
36  
37  
38  
39  
40  
41  
42  
43  
44  
45  
46  
47  
48  
49  
50  
51  
52  
53  
54  
55  
56  
57  
58  
59  
60

---

**The future burden of obesity-related diseases in the 53 WHO  
European-Region countries and the impact of effective interventions:  
A modelling study.**

5 Laura Webber, Diana Divajeva, Tim Marsh, Klim McPherson, Martin Brown, Gauden Galea, Joao Breda

Corresponding author: Laura Webber, Deputy Director: Modelling, UK Health Forum, Fleetbank House, 2-6 Salisbury Square, London, EC4Y 8JX, UK [laura.webber@ukhealthforum.org.uk](mailto:laura.webber@ukhealthforum.org.uk)

10 Diana Divajeva, Research Associate, UK Health Forum, Fleetbank House, 2-6 Salisbury Square, London, EC4Y 8JX, UK

Tim Marsh, Director: Modelling, UK Health Forum, Fleetbank House, 2-6 Salisbury Square, London, EC4Y 8JX, UK

Klim McPherson, Emeritus Professor, New College, University of Oxford, OX1 3BN

15 Martin Brown, Senior statistician, UK Health Forum, Fleetbank House, 2-6 Salisbury Square, London, EC4Y 8JX, UK

Gauden Galea, Director of the Division of Noncommunicable Diseases and Life-course, WHO Regional Office for Europe, UN City; Marmorvej 51 - DK-2100 Copenhagen ø Denmark, Phone: +45 30 50 8022

20 Joao Breda, Programme Manager, Nutrition, Physical Activity and Obesity WHO Regional Office for Europe, UN City; Marmorvej 51 - DK-2100 Copenhagen ø Denmark, Phone: +45 30 50 8022

Key words: obesity, Europe, modelling, micro-simulation

Word count: 3129

25

---

## Disclaimer

Gauden Galea and João Breda are staff members of the World Health Organization. The authors alone are responsible for the content and writing of this paper, which does not necessarily represent the decisions, policy or views of the World Health Organization.

For peer review only

---

## ABSTRACT

**Objectives:** This paper utilises a sophisticated modelling approach to project the future burden of Coronary Heart Disease (CHD), stroke, type 2 diabetes and seven cancers to 2030 in all 53 WHO European-Region countries based on current and past obesity trends. It also tests the eventual impact of effective obesity interventions upon the future disease burden.

**Setting:** Body Mass Index (BMI), and disease incidence and mortality data were sourced from country statistics databases, published sources or contact with authors and country representatives. A two module, microsimulation modelling process was used to simulate longitudinal projections to 2030. The effect of three hypothetical interventions on the future burden of disease were tested: Baseline intervention, BMI trends go unchecked; intervention 1, BMI trends decrease by 1%; intervention 2, BMI levels decrease by 5%.

**Participants:** Data by age and sex were sourced for each of the 53 WHO-European region countries, however where these were not available other 'proxy' country data were used.

**Results:** By 2030, rates of diabetes, and CHD and stroke are projected to reach an average of 2354 and 1604 cases respectively per 100,000 of the population across Europe. The highest increased incidence of diabetes was predicted in Slovakia reaching over 3000 cases per 100,000 of the population. For CHD and stroke the highest projected incidence was in Austria, Latvia and Turkey where >2500 cases were predicted by 2030.

**Conclusion:** Obesity-related non-communicable diseases are increasing. Modelling future disease trends is important for policy makers in realistically allocating resources and implementing policies that prevent disease incidence. Future research will allow real policy interventions to be tested, however better surveillance data on NCDs and their risk factors are particularly important if accurate estimates of future trends are to be quantified.

## STRENGTHS AND LIMITATIONS

- Use of a dynamic, microsimulation model to project obesity trends and related diseases in all 53-WHO Euro-region countries allowing quantification of the disease burden
- The model also forecasts future healthcare costs and the cost-effectiveness of specific interventions creating a useful tool for policy makers in planning future health expenditure.
- A paucity of surveillance data in some countries means that projections are less accurate than countries with more current and detailed data.
- Childhood obesity trends were not included due to the lack of data availability
- A key assumption of the model is that people do not reverse in the BMI categories. At a population level this generally reflects reality.

## BACKGROUND

Noncommunicable diseases such as cardiovascular and respiratory disease are the highest cause of death globally (1). In 2008 the World Health Organization (WHO) estimated that mortality from diseases such as heart disease, stroke, chronic lung disease, cancer and diabetes totalled 36.1 million (2). As a result, global leaders made a political declaration to provide a coordinated response to preventing and controlling NCDs at the UN High-Level Meeting on NCDs in September 2011 (3). Nine global voluntary targets were set that aimed to reduce NCDs. The mortality goal pledges to reduce premature mortality from NCD by 25% by 2025 (the 25 by 25 goal) (4).

NCDs are particularly high on the European parliament's agenda since they account for 86% of deaths and 77% of disease burden (2), and this burden is addressed in Health 2020, the new European Policy (5). Health 2020 highlights the stark inequality in across Europe, where the risk of NCDs is higher in individuals from the most disadvantaged groups since they have poorer access to health care and fewer resources such as education, employment, and housing making choosing healthy lifestyles more difficult. The WHO European Region is determined to take forward the UN political declaration to reduce avoidable deaths from NCDs turning the declaration into action and the WHO is working to provide public health tools that help all countries across the broader European region to implement more effective programmes based on an extensive reflection process(5).

The causes of NCDs are genetic, behavioural and environmental (6). Rapid changes in health related behaviours in recent decades has seen an upsurge in NCD prevalence (7) through modifiable lifestyle factors such as diet and exercise. Market forces driving down costs of high calorie fatty, salty and sugary foods have made them cheap and readily available resulting in increased consumption and

expanding waistlines. In addition, advances in technology such as motorised transport and television have promoted sedentary lifestyles and reduced physical activity (8). Interventions that are able to tackle important risk factors such as obesity are likely to have a positive impact upon NCD prevalence and premature mortality caused by NCDs.

5 Projections from the UK show that effective behavioural interventions will be effective in reducing future incidence of diseases such as coronary heart disease, stroke, type 2 diabetes and some cancers. For example, reducing body mass index (BMI) by 1% across the population (equivalent to 1kg weight loss) was estimated to substantially reduce health burden, saving 179,000-202,000 incident cases of type 2 diabetes, 122,000 cases of cardiovascular diseases and 32,000-33,000 incident cases of cancer over 20 years(9). Data from Russia showed that obesity rates are predicted to increase to as high as 76% in males by 2050, and rates of CHD and Stroke will reach 12,723 cases per 100,000 of the population (10). Similar projections have been carried out in other European countries (11): though to our knowledge estimates of the future burden of obesity-related diseases in all European countries have not been carried out.

15 There is, therefore a new threat menacing recent progress in NCD mortality and morbidity which needs to be quantified and this study ignites this discussion within the context of health impact models. This study also hypothesises that while reduction in the burden of NCDs has been sustained, obesity is actually threatening those gains. As such this study updates and extends this work by using a microsimulation model to project NCD trends to 2030 in all 53 Euro-region countries and assesses the impact of two hypothetical interventions, intervention 1: a 1% reduction in population BMI and intervention 2: a 5% reduction in population BMI, upon the future incidence of CHD and Stroke, type 2 diabetes and obesity-related cancers.

## 25 SETTING AND PARTICIPANTS

### BMI data extraction

Online databases (Global database on Body Mass Index (12), EU members' statistical office databases, Pubmed (13) and Science Direct (14)) were searched for published data on age and sex-specific country obesity prevalence data presented according WHO definitions of normal weight, overweight and obesity (ref WHO database). Article references were also searched and individual researchers and public health officers were contacted for further data. A table of BMI references are

presented in appendix 1 and methods of BMI data manipulation are explained in appendix 2 of the supplementary information.

### Disease data sources

5

A second review of statistical databases and literature was carried out to locate country-specific incidence, prevalence, survival and mortality data for CHD, stroke and obesity-related cancers (colorectal, pancreas, breast, kidney, liver, corpus uteri and oesophageal) as well as incidence and/or prevalence data of type 2 diabetes.

10

Where prevalence, but not incidence, data were available by age and sex the prevalence was converted to incidence using equations devised for DISMOD II software (15). Where neither incidence nor prevalence data were available data from a proxy country were used. CHD incidence was often rare, so UK, Georgia, Spain, Russia, Uzbekistan incidence data were used as proxies for countries with a similar geographical location or had comparable average prevalence rates. For example, for CHD data Russian data were used as a proxy for Belarus; and Uzbekistan data were used for Kazakhstan, Kyrgyzstan, Tajikistan, Turkmenistan. Greater detail of which countries were used as proxies is presented in appendix 3. For fatal diseases the ratio of the target-to-proxy countries' mortality rates was used to scale the proxy country's incidence rates. For type 2 diabetes proxy country data were adjusted for the different population BMI-distributions.

20

For survival data, the probability of survival,  $p$ , for a number of years,  $T$ , after acquiring a fatal disease was modelled in one of two ways depending on the disease. Either as a simple exponential distribution  $p=e^{-RT}$ , or as an exponential distribution allowing for different probability,  $p_1$ , of survival in the first year,  $p = p_1 e^{-R(T-1)}$ . Stroke used the latter model; other fatal diseases the former. Disease survival statistics consist of the rate  $R$  or the rate  $R$  together with the first year survival probability  $p_1$ . These statistics are further classified by age group and gender. The rate  $R$  was usually inferred from quoted 5-year survival statistics.

25

The relative risks of contracting each disease according to pre-obesity (BMI 25-29.9 kg/m<sup>2</sup>) and obesity (BMI 30≥ kg/m<sup>2</sup>) relative to normal weight (BMI 18.5-24.9 kg/m<sup>2</sup>) were taken from the International Association for the Study of Obesity (16).

30

A table of disease references for each country is presented in appendix 3.

### Statistical analysis

Detailed statistical analysis is described in appendix 4, Foresight: Tackling Obesities (17) and Wang and colleagues(9). A dual-module modelling process was carried out: Module one fits cross-sectional BMI data from each country using a non-linear multivariate, categorical regression model. Module two creates virtual country cohorts of 5,000,000 individuals using a microsimulation method to produce longitudinal projections to 2030 based on module one BMI distributions. Microsimulation is a computer modelling technique that works at the level of the individual; it generates individual life-histories of a specified population and this population reflects the age profile, birth, death and health statistics to make future projections. A BMI value is probabilistically assigned as a function of age, sex and calendar year and an individuals' BMI percentile in the same age cohort assumed to stay the same over time. Population size, births and deaths were also simulated in a large number of individuals as they age using data from the United Nations population statistics (18). Population pyramids are presented in appendix 5. Within the simulation, individuals are at greater risk of getting a particular disease each year if he or she did not have the disease at the beginning of the year. Individuals can continue living with the disease or die from it (if it is fatal). The software for this program was written in C++ (19).

To estimate the disease burden associated with the trends in overweight and obesity, as well as the effect of possible interventions, future increases in obesity-related diseases were projected from 2010 to 2030, using three different trend interventions: intervention 0: obesity trends go unchecked; intervention 1: obesity levels decrease by 1% and intervention 2: obesity levels decrease by 5%. The cumulative incidence cases avoided for the whole of Europe was analysed by summing the weighted average of incidence for each country.

### RESULTS

Only 36 countries had three or more years of BMI data. Less than or equal to two points of BMI data were available for the remaining 17 countries (Albania, Andorra, Belarus, Bosnia, Croatia, Cyprus, Georgia, Hungary, Macedonia, Monaco, Montenegro, Romania, San Marino, Serbia, Slovenia, Tajikistan and Turkmenistan) so results in this instance are interpreted with caution.

Alongside obesity, obesity-related diseases are projected to increase in almost all countries. Figure 1 presents the average projected prevalence rates for Europe (weighted for total population) by intervention. A 1% reduction in population BMI would result in an average of 1575 CHD & stroke prevalence cases per 100,000 of the population in Europe. This is a prevalence gain of 29 cases per



100,000, equating to a 1.8% reduction. A 5% reduction in population BMI would result in an average of 2021 cases of type 2 diabetes by 2030 per 100,000 of the population in 2010. This is a reduction in prevalence of 333 cases per 100,000, equating to a 16% reduction across Europe relative to intervention 0 (rates continue unabated). There was wide variability between countries.

- 5 Figure 2 shows the projected prevalence to 2030 of each disease by country per 100,000 of the population in 2010. The highest projected prevalence of cancers was observed in Finland with 5615 cases per 100,000 of the population in 2010. The highest projected prevalence of CHD and stroke was observed in Greece with 11,292 cases and the highest projected prevalence of type 2 diabetes was in Slovakia with 10,870 cases per 100,000 of the population in 2010.
- 10 Figure 3 presents the European average cumulative incidence gains by 2030 for each disease given a 1% or 5% reduction in population BMI relative to intervention 0 (rates continue unabated). A 1% reduction in BMI would result in an average of 56 cases of cancer per 100,000 of the population in 2010 being gained by 2030. A 5% reduction in population BMI would result in the avoidance of 1153 cumulative incidence cases of CHD and stroke per 100,000 of the population by 2030.
- 15 Data tables for each country displaying cumulative incidence cases, cumulative incidence cases avoided, prevalence cases and prevalence cases avoided per 100,000 of the population are presented in appendix 6.

## CONCLUSION

- 20 This study used a microsimulation model to test the impact of effective interventions that reduce population BMI upon the future burden of disease. With only a few exceptions, obesity rates across the 53 countries were projected to increase by 2030. This is worrying given the extent of the related disease burden associated with obesity. There appeared to be very little pattern to the projected disease trends regionally across Europe.

- Because of increasing obesity trends our findings suggest that in 20 years an increasing number of people will be living with an obesity-related chronic disease in almost every county in Europe. Interestingly, there was sometimes a rapid increase from 2010 to 2020 then a steadier increase to 2030. Birth rates are low across Europe with most total fertility rates (TFR) below 2. This means that the population is ageing with fewer young people. Only Azerbaijan (2.12), Israel (2.62), Tajikistan (3.13) and Uzbekistan (2.19) have TFRs above 2. Projecting further we may observe a dip in

prevalence rates as those with the disease die while there are fewer younger people to contract the disease. Differences in the population profiles across countries may therefore result in different estimates even if current disease incidence is comparable. Population profiles for each country are illustrated in appendix 5 of the supplementary information.

- 5 Obesity-related cancers are rare and have relatively low rates compared with the other diseases. However, rates are projected to increase. Recent trends in cancer survival across Europe between 2000 and 2004 reported that the survival of breast cancer was lower in Eastern Europe (Poland, Estonia, Slovenia) than elsewhere in Europe (20). Screening and medical advances and less access to effective treatment are likely to account for differences with Western Europe.
- 10 Obesity is closely linked with insulin resistance and in recent years an epidemic of type 2 diabetes has evolved alongside rapid increases in obesity. In the UK alone, a continued increase in obesity is projected to add 6-8.5 million incidence cases of type 2 diabetes by 2030, at a substantial cost to the UK health system<sup>(9)</sup>. Rates of Coronary Heart Disease and Stroke too were projected to increase across most countries. Highest prevalence rates were seen in Greece (11,292 per 100,000 population) and the lowest in Spain (1030 per 100,000 population). However, since very little CHD data were available, UK data was often used as a proxy, possibly underestimating the rates of CHD in Europe. Where data were available (e.g. Ireland, Finland) much higher rates were predicted suggesting that rates may be underestimated when using UK data and interpretation of proxy data should be made with caution. Data for stroke incidence was mostly taken from estimates by
- 20 Truelson and colleagues (21). These data were compared with Estonia from the 2007 Tartu Stroke registry (22) and appear to be slightly inflated. Similarly, rates were higher in the Truelson estimates compared with Polish data from 2005-2006 so rates of stroke incidence maybe slightly overestimated.
- Quantification of the burden of NCDs is important both to patients and public health professionals because of the long-term consequences to patients' functioning and demand for health care(23). However, quantification via microsimulation is dependent upon good quality surveillance data yet the present study highlights the lack of up-to-date surveillance data – especially annual measured BMI from the same survey and disease incidence data. These data are necessary if national policies to control NCDs are to be appraised objectively. For some countries no satisfactory BMI data were
- 30 available so proxy country data were used (in the case of Member States with very small populations) or extrapolated from mean data (in the case of other countries). Some of the trends shown by the analysis have large confidence intervals due to the small number of data points used as well as the small sample sizes of some of the studies, and therefore the observed trends can only

1  
2  
3  
4 be indicative. Ideally the data should be measured, but for most countries we had to use studies in  
5  
6 which anthropometry had been self-reported. This weakens the analysis, particularly if used in  
7  
8 combination with measured data, because people tend to underreport their weight in interviews or  
9  
10 surveys.

11 5 Relative risk data may also be limited in the extent to which they estimate the true impact of BMI on  
12  
13 disease. Relative risks were taken from the International Association for the Study of Obesity (16) as  
14  
15 these were deemed the best available at the time of development of the country models. However,  
16  
17 there are limitations to these risks due to the lack of suitable metanalyses used to calculate them. It  
18  
19 was assumed that the relative risk estimates are the same for all age groups since data were not  
20  
21 always available by age. They are also based on both measured and self-reported data and do not  
22  
23 account for ethnic differences in body composition. In the present study we included the same  
24  
25 relative risk for each Member State; however given the paucity of epidemiological data on both BMI  
26  
27 and disease within many of the countries of interest it is unknown whether this assumption is valid.

28  
29  
30  
31  
32  
33  
34  
35  
36  
37  
38  
39  
40  
41  
42  
43  
44  
45  
46  
47  
48  
49  
50  
51  
52  
53  
54  
55  
56  
57  
58  
59  
60  
15 Increased surveillance and monitoring of NCDs is one of the six key objectives of the WHO 2008-  
2013 Global strategy for the Prevention and Control of Non-communicable Diseases (24). This  
strategy aims to target governments in making policies that control and abate the increasing  
prevalence of NCDs across Europe and our results provide further evidence for raising the priority of  
NCD prevention. In particular, this study promotes the need for interventions that are effective in  
reducing major NCD risk factors (objective 3 of the strategy). In addition to this, in early 2013 the  
WHO formed a global monitoring framework which aims to track the progress of prevention of  
major non-communicable diseases and their key risk factors and consists of nine global targets and  
25 indicators adopted by the WHO Member States during the 66th World Health Assembly in May  
2013.

The microsimulation models are easily adaptable to include new data when it becomes available  
from such strategies. For example, we were not able to include data on children because of the  
limited amount of standardised data but with initiatives such as the WHO Childhood Obesity  
Surveillance Initiative (25) assessment of future childhood obesity trends will be possible. The  
models can also forecast future healthcare costs and the cost-effectiveness of specific interventions  
since our model incorporates our sophisticated economic module. Withrow and Alter (26) carried  
out a systematic review of the direct costs of obesity and found that obesity accounted for 0.7-2.8%  
of a countries total healthcare cost. Further, obese individuals have 30% higher healthcare costs  
than non-obese individuals though little published data on healthcare costs exists. Another  
important point of future work is to explore joint risk factors such as tobacco, physical activity and

1  
2  
3  
4 alcohol. Integration of these would be a valuable next step in quantifying the total life-style related  
5 disease burden.  
6

7  
8 A key assumption of the model is that people do not reverse in the BMI categories. At a population  
9 level this generally reflects reality, where weight loss is often only temporary. However this  
10  
11 5 assumption does not take into account future changes in circumstances, such as fluctuations in food  
12 prices. It relies on our best estimate based on previous trends. That said, this approach allows for  
13  
14 future trends to be forecast so that policy makers can plan interventions and allocate resources  
15 appropriately.  
16

17  
18 It is clear that tackling NCDs and obesity is a major challenge across Europe placing unsustainable  
19  
20 10 burden on struggling health systems. Governments need to initiate change that effectively reduces  
21 key risk factors such as obesity through preventative measures such as food tax, industry pledges  
22 and reduced junk food marketing that may go some way into reducing obesity-related mortality.  
23  
24 Primary prevention is crucial if increasing trends are to be averted (27).  
25  
26  
27  
28

29 15  
30  
31  
32  
33  
34  
35  
36  
37  
38  
39  
40  
41  
42  
43  
44  
45  
46  
47  
48  
49  
50  
51  
52

53 20  
54  
55  
56  
57  
58  
59  
60

25

---

**Data sharing**

Data used in these analyses are from published sources and can be accessed upon request.

**Competing Interests**

All authors have completed the ICMJE uniform disclosure form at [www.icmje.org/coi\\_disclosure.pdf](http://www.icmje.org/coi_disclosure.pdf) and declare: no support from any organisation for the submitted work; no financial relationships with any organisations that might have an interest in the submitted work in the previous three years; no other relationships or activities that could appear to have influenced the submitted work.

**Contributorship**

All authors have completed the ICMJE uniform disclosure form at [www.icmje.org/coi\\_disclosure.pdf](http://www.icmje.org/coi_disclosure.pdf) and declare: no support from any organisation for the submitted work; no financial relationships with any organisations that might have an interest in the submitted work in the previous three years; no other relationships or activities that could appear to have influenced the submitted work.

LW and DD carried out the acquisition, analysis and interpretation of data for the work in this study and drafted the manuscript. TM, JB, KM, GG contributed to the conception and design of this study. JB, GG, TM, MB, KM revised the document for important intellectual content.

All authors edited and approved the final version of this manuscript and agree to be accountable for all aspects of the work in ensuring that questions related to the accuracy or integrity of any part of the work are appropriately investigated and resolved.

## REFERENCES

- 1 Imperial College London. Global Burden of Metabolic Risk Factors of Chronic Diseases.  
5 [www5.imperial.ac.uk/medicine/metabolic\\_risks/bmi/](http://www5.imperial.ac.uk/medicine/metabolic_risks/bmi/) (accessed May 20, 2013).
- 2 World Health Organization. Global Status Report on NCDs.  
14 [www.who.int/chp/ncd\\_global\\_status\\_report/en/](http://www.who.int/chp/ncd_global_status_report/en/) (accessed April 15, 2013).
- 3 General Assembly of the United Nations. UN High Level Meeting Non-Communicable  
18 Diseases. [www.un.org/en/ga/president/65/issues/ncdiseases.shtml](http://www.un.org/en/ga/president/65/issues/ncdiseases.shtml) (accessed June 1 2013)
- 10 4 World Health Organization. NCD Global Monitoring Framework.  
24 [www.who.int/nmh/global\\_monitoring\\_framework/en/](http://www.who.int/nmh/global_monitoring_framework/en/) (accessed June 1, 2013)
- 5 World Health Organization Regional Office for Europe. The new European policy for health.  
27 Health 2020: vision, values, main directions and approaches.  
30 [www.who.int/nmh/global\\_monitoring\\_framework/en/](http://www.who.int/nmh/global_monitoring_framework/en/) (accessed June 4 2013)
- 15 6 Shuldiner AR. Obesity genes and gene-environment-behavior interactions:  
33 recommendations for a way forward. *Obesity* 2008; Suppl 3: S79-S81.
- 7 World Health Organization. Diet, Nutrition and the prevention of Chronic Disease. 2003;  
38 [http://whqlibdoc.who.int/trs/who\\_trs\\_916.pdf](http://whqlibdoc.who.int/trs/who_trs_916.pdf) (accessed February 10, 2013)
- 20 8 Jones A, Bentham G, Foster C, Hillsdon M, Panter J. Foresight Tackling Obesities: Future  
42 Choices - Obesogenic Environments - Evidence Review. 2007; Government Office for  
44 Science. [www.bis.gov.uk/assets/foresight/docs/obesity/03.pdf](http://www.bis.gov.uk/assets/foresight/docs/obesity/03.pdf) (accessed January 23, 2013)
- 9 Wang YC, McPherson K, Marsh T, Gortmaker SL, Brown M. Health and economic burden of  
48 the projected obesity trends in the USA and the UK. *Lancet* 2011; **378**:815-25.
- 25 10 Rtveldze K, Marsh T, Webber L, Kilpi F, Goryakin Y, Kontsevaya A et al. Obesity trends in  
52 Russia. The impact on health and healthcare costs . *Health* 2012; **4**:1471-84.

- 1  
2  
3  
4 11 Webber L, Kilpi F, Marsh T, Rtveladze K, McPherson K, Brown M. Modelling obesity trends  
5 and related diseases in Eastern Europe. *Obes Rev* 2012; 13:744-51.  
6  
7  
8 12 World Health Organization. Global database on body mass index. <http://apps.who.int/bmi/>  
9 (accessed March 3, 2012).  
10  
11 5  
12  
13  
14 13 National Institute of Health. Pubmed.gov US National Library of Medicine.  
15 <http://www.ncbi.nlm.nih.gov/pubmed> (accessed March 2, 2013).  
16  
17  
18 14 Elsevier. Science Direct. [www.sciencedirect.com](http://www.sciencedirect.com) (accessed June 15, 2012)  
19  
20  
21  
22 10 15 World Health Organization. DISMOD II.  
23 [www.who.int/healthinfo/global\\_burden\\_disease/tools\\_software/en/](http://www.who.int/healthinfo/global_burden_disease/tools_software/en/) (accessed November  
24 28, 2012)  
25  
26  
27  
28  
29 16 International Association for the Study of Obesity. Estimated relative risk of disease by BMI  
30 15 category: overweight and obesity.  
31 [www.iaso.org/site\\_media/uploads/Appendix\\_Relative\\_Risk\\_Assessments\\_IASO.pdf](http://www.iaso.org/site_media/uploads/Appendix_Relative_Risk_Assessments_IASO.pdf)  
32 (accessed November 20, 2012)  
33  
34  
35  
36  
37  
38 17 McPherson K, Marsh T, Brown M. Foresight report on obesity. *Lancet* 2007; **37**: 1755.  
39  
40 20 18 United Nations Department of Economics and Social Affairs. World Population Prospects,  
41 the 2010 Revision. <http://esa.un.org/wpp/> (accessed 10 June 2012).  
42  
43  
44  
45  
46 19 Embarcadero Technologies. embarcadero. [www.embarcadero.co.uk/](http://www.embarcadero.co.uk/) (accessed June 10,  
47 2013).  
48  
49 25  
50  
51  
52 20 Gondos A, Bray F, Brewster DH, Coebergh JW, Hakulinen T, Janssen-Heijnen ML et al. Recent  
53 trends in cancer survival across Europe between 2000 and 2004: a model-based period  
54 analysis from 12 cancer registries. *Eur J Cancer* 2008; **44**: 1463-75.  
55  
56  
57  
58  
59  
60

- 1  
2  
3  
4 21 Truelsen T, Piechowski-Jóźwiak B, Bonita R, Mathers C, Bogousslavsky J, Boysen G. Stroke  
5 Incidence and Prevalence in Europe: a Review of Available Data. *Eur J Neurology* 2006; **13**,  
6 581-98.  
7  
8  
9  
10 22 Vibo R, Korv J, Roose M. The Third Stroke Registry in Tartu, Estonia, from 2001 to 2003. *Acta*  
11 5 *Neurol Scand* 2007; **116**: 31-6.  
12  
13  
14 23 Van Den Bos. The burden of chronic diseases in terms of disability, use of health care and  
15 healthy life expectancies. *European journal of public health* 1995; **5**: 29-34.  
16  
17  
18 24 World Health Organization. 2008-2013 Action Plan for the Global Strategy for the Prevention  
19 and Control of Noncommunicable Diseases. Geneva, Switzerland: WHO document  
20 production services [www.who.int/nmh/publications/9789241597418/en/](http://www.who.int/nmh/publications/9789241597418/en/) (accessed June 1,  
21 10 2013).  
22  
23  
24  
25 25 World Health Organization. Childhood Obesity Surveillance Initiative.  
26 [www.euro.who.int/en/what-we-do/health-topics/disease-](http://www.euro.who.int/en/what-we-do/health-topics/disease-prevention/nutrition/activities/monitoring-and-surveillance/who-european-childhood-obesity-surveillance-initiative-cosi)  
27 [prevention/nutrition/activities/monitoring-and-surveillance/who-european-childhood-](http://www.euro.who.int/en/what-we-do/health-topics/disease-prevention/nutrition/activities/monitoring-and-surveillance/who-european-childhood-obesity-surveillance-initiative-cosi)  
28 [obesity-surveillance-initiative-cosi](http://www.euro.who.int/en/what-we-do/health-topics/disease-prevention/nutrition/activities/monitoring-and-surveillance/who-european-childhood-obesity-surveillance-initiative-cosi) (accessed May 2, 2012).  
29 15  
30  
31  
32 26 Withrow D, Alter DA. The economic burden of obesity worldwide: a systematic review of the  
33 direct costs of obesity. *Obes Rev* 2011; **12** :131-41.  
34  
35  
36  
37 27 World Health Organization. Global Status Report on NCDs 2011 - chapter 7.  
38 [www.who.int/chp/ncd\\_global\\_status\\_report/en/](http://www.who.int/chp/ncd_global_status_report/en/) (accessed June 2, 2013).  
39 20  
40  
41  
42  
43  
44  
45  
46  
47  
48  
49  
50  
51  
52  
53  
54  
55  
56  
57  
58  
59  
60



## FIGURE LEGENDS

Figure 1. Total projected prevalence rates by 2030 per 100,000 of the population in 2010 for all 53 Euro-region countries.

Figure 2. Projected disease prevalence of diabetes, CHD & Stroke, cancers per 100,000 of the population by 2030 by country.

Figure 3. Projected incidence gain in 2030 by disease and intervention per 100,000 of the population in 2010

Figure 4. Projected cumulative incidence gain per 100,000 of the population by 2030 in each of the 53 Euro-region countries given a 5% reduction in population BMI.

## APPENDICES

Appendix 1: A table of BMI references

Appendix 2: BMI manipulation methods

Appendix 3: Disease references

Appendix 4: Detailed statistical methods

Appendix 5: Population pyramids

Appendix 6: Data tables presenting prevalence rate, prevalence gains, cumulative incidence cases and incidence cases avoided by 2030 for each country.

25

1  
2  
3  
4  
5  
6  
7  
8  
9  
10  
11  
12  
13  
14  
15  
16  
17  
18  
19  
20  
21  
22  
23  
24  
25  
26  
27  
28  
29  
30  
31  
32  
33  
34  
35  
36  
37  
38  
39  
40  
41  
42  
43  
44  
45  
46  
47  
48  
49  
50  
51  
52  
53  
54  
55  
56  
57  
58  
59  
60

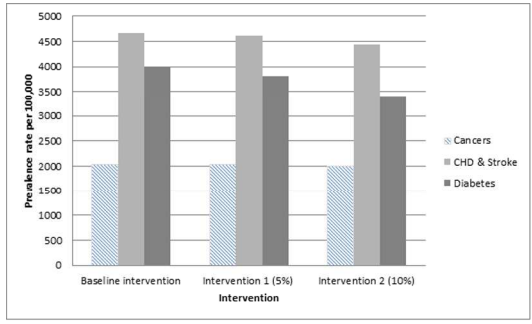

Figure 1. Total projected prevalence rates by 2030 per 100,000 of the population in 2010 for all 53 Euro-region countries.  
304x171mm (300 x 300 DPI)

review only

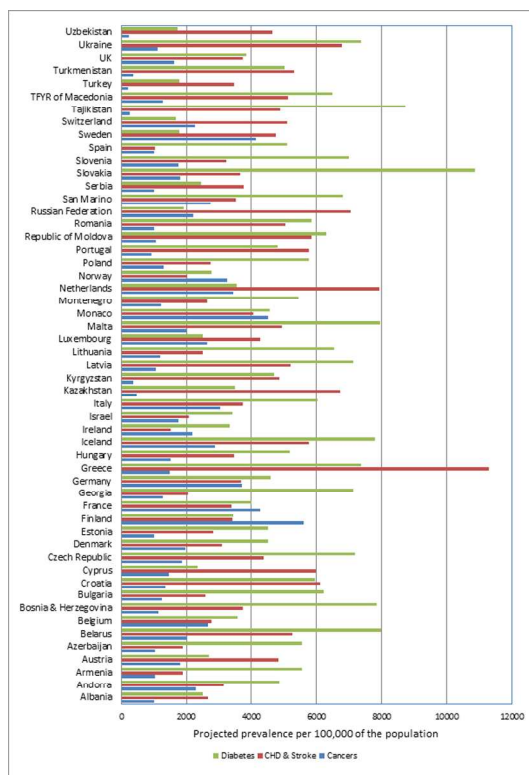

Figure 2. Projected disease prevalence of diabetes, CHD & Stroke, cancers per 100,000 of the population by 2030 by country.  
304x234mm (300 x 300 DPI)

ew only

1  
2  
3  
4  
5  
6  
7  
8  
9  
10  
11  
12  
13  
14  
15  
16  
17  
18  
19  
20  
21  
22  
23  
24  
25  
26  
27  
28  
29  
30  
31  
32  
33  
34  
35  
36  
37  
38  
39  
40  
41  
42  
43  
44  
45  
46  
47  
48  
49  
50  
51  
52  
53  
54  
55  
56  
57  
58  
59  
60

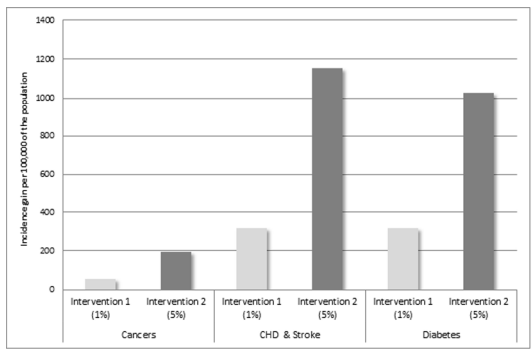

Figure 3. Projected incidence gain in 2030 by disease and intervention per 100,000 of the population in 2010  
304x234mm (300 x 300 DPI)

View only

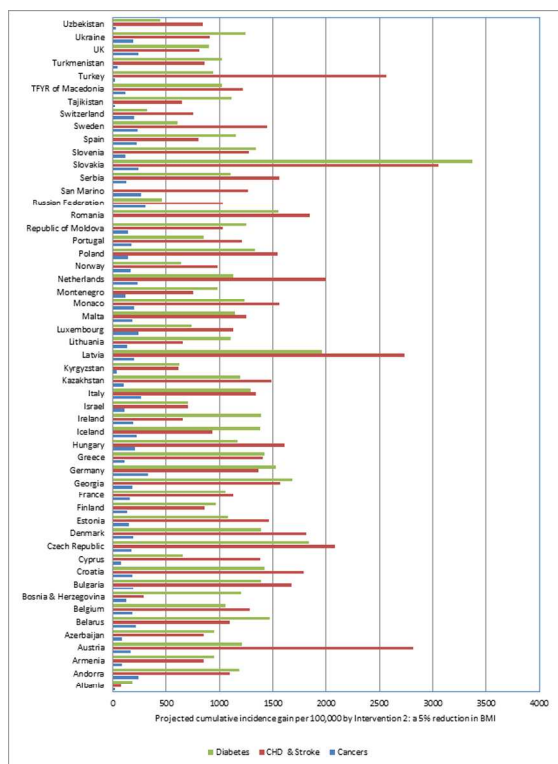

Figure 4. Projected cumulative incidence gain per 100,000 of the population by 2030 in each of the 53 Euro-region countries given a 5% reduction in population BMI.  
304x234mm (300 x 300 DPI)

## Appendix 1 Table of BMI references for each country

| Country                | Study name citation                                                          | Data year(s) | Sample size |      | Age groups | Measured/<br>self-reported | National/<br>regional data |
|------------------------|------------------------------------------------------------------------------|--------------|-------------|------|------------|----------------------------|----------------------------|
|                        |                                                                              |              | M           | F    |            |                            |                            |
| Albania                | Shapo et al, 2003<br>Demographic and Health Survey                           | 2001         | 535         | 585  | 24-65+     | Measured                   | Regional                   |
|                        |                                                                              | 2009         | 2972        | 7330 | 15-49      | Measured                   | National                   |
| Andorra                | No BMI data, Spain proxy adjusted for Monaco population size and structure   |              |             |      |            |                            |                            |
| Armenia                | Demographic and Health Survey                                                | 2000         | -           | 5962 | 15-49      | Measured                   | National                   |
|                        | Personal communication B. Roberts                                            | 2001         | 745         | 1049 | 18-60+     | Self-reported              | National                   |
|                        | Demographic and Health Survey                                                | 2005         | -           | 6016 | 15-49      | Measured                   | National                   |
|                        | Personal communication B. Roberts                                            | 2010         | 789         | 932  | 18-60+     | Self-reported              | National                   |
| Austria                | Health Statistics Austria, 2002                                              | 1999         | 3368        | 3624 | 15-100     | Self-reported              | National                   |
|                        | Schwarz, Abdominal Obesity and Cardiometabolic Risk Factors in Austria, 2007 | 2006         | 528         | 526  | 30-74      | Self-reported              | National                   |
|                        | Klimont et al, Österreichische Gesundheitsbefragung, 2006/2007               | 2007         | 2914        | 3203 | 20-100     | Self-reported              | National                   |
| Azerbaijan             | WHO <sup>1</sup> : Reproductive Health Survey                                | 2001         | -           | 1772 | 20-44      | Measured                   | National                   |
|                        | Demographic and Health Survey                                                | 2006         | 2382        | 7793 | 15-49      | Measured                   | National                   |
|                        | Personal communication B. Roberts                                            | 2010         | 789         | 821  | 18-60+     | Self-reported              | National                   |
|                        | Azerbaijan Statistical yearbook 2012                                         | 2011         | 2056        | 2194 | 15-65+     | Unknown                    | National                   |
| Belarus                | Personal communication B. Roberts                                            | 2001         | 758         | 925  | 18-60+     | Self-reported              | National                   |
|                        | Personal communication B. Roberts                                            | 2010         | 764         | 991  | 18-60+     | Self-reported              | National                   |
| Belgium                | Belgian Health Interview Survey, 1997                                        | 1997         | 3934        | 4137 | 15-100     | Self-reported              | National                   |
|                        | Belgian Health Interview Survey, 2001                                        | 2001         | 4582        | 4809 | 15-100     | Self-reported              | National                   |
|                        | Belgian Health Interview Survey, 2004                                        | 2004         | 4836        | 5483 | 15-100     | Self-reported              | National                   |
|                        | Belgian Health Interview Survey, 2008                                        | 2008         | 4093        | 4738 | 15-100     | Self-reported              | National                   |
| Bosnia and Herzegovina | WHO: Laatikainen T et al, 2002                                               | 2002         | 1118        | 1613 | 25-64      | Measured                   | National                   |
|                        | Estimated from Global Burden of Disease mean data <sup>2</sup>               | 2008         |             |      |            |                            |                            |
| Bulgaria               | WHO; Survey of the Health Status of the Population                           | 2001         | 8008        |      | 25-74      | Self-reported              | National                   |
|                        | WHO; Petrova et al 2006                                                      | 2004         | 515         | 516  | 25-74      | Self-reported              | National                   |
|                        | Eurostat database: Health Interview Survey 2008 Bulgaria                     | 2008         | 5664        |      | 25-84      | Self-reported              | National                   |

| Country                                                                | Study name citation                                                                           | Data year(s) | Sample size |        | Age groups    | Measured/<br>self-reported | National/<br>regional data |
|------------------------------------------------------------------------|-----------------------------------------------------------------------------------------------|--------------|-------------|--------|---------------|----------------------------|----------------------------|
|                                                                        |                                                                                               |              | M           | F      |               |                            |                            |
| Croatia                                                                | WHO; Budak, 2003                                                                              | 97-99        | 1967        | 2982   | 0-100         | Measured                   | National                   |
|                                                                        | WHO; Croatian Adult Health Survey                                                             | 2003         | 2878        | 6162   | 18+           | Measured                   | National                   |
| Cyprus                                                                 | Statistical Service Cyprus, personal communication                                            | 2003         | 267866      | 284397 | 15-100        | Self-reported              | National                   |
|                                                                        | Statistical Service Cyprus, personal communication                                            | 2008         | 277077      | 300761 | 15-100        | Self-reported              | National                   |
| Czech Republic                                                         | WHO; Sample Survey of the Health Status of the Czech Population HIS CR 1993                   | 1993         | 734         | 833    | 20-74         | Self-reported              | National                   |
|                                                                        | WHO; Sample Survey of the Health Status of the Czech Population 1996                          | 1996         | 1031        | 1123   | 20-74         | Self-reported              | National                   |
|                                                                        | WHO; Sample Survey of the Health Status of the Czech Population HIS 1999                      | 1999         | 1603        | 1760   | 20-74         | Self-reported              | National                   |
|                                                                        | WHO; Sample Survey of the Health Status of the Czech Population HIS 2002                      | 2002         | 1142        | 1284   | 20-74         | Self-reported              | National                   |
|                                                                        | Eurostat database: European Health Interview Survey 2008 Czech Republic                       | 2008         | 940         | 1015   | 20-74         | Self-reported              | National                   |
| Denmark                                                                | SUSY 2000, National Institute of Public Health                                                | 2000         | 8126        | 8275   | 16-100        | Self-reported              | National                   |
|                                                                        | Ekholm et al, Health and mortality survey Denmark, 2005                                       | 2006         | 7046        | 7441   | 16-100        | Self-reported              | National                   |
|                                                                        | SUSY 2010, National Institute of Public Health                                                | 2010         | 79347       | 92873  | 16-100        | Self-reported              | National                   |
| Estonia                                                                | Unpublished data obtained from Mare Tekkel                                                    | 1998         | 561         | 743    | 16-64         | Self-reported              | National                   |
|                                                                        | Kasmel et al. Health behaviour among Estonian adult population, spring 2000                   | 2000         | 547         | 790    | 16-64         | Self-reported              | National                   |
|                                                                        | Kasmel et al. Health behaviour among Estonian adult population, spring 2002                   | 2002         | 542         | 779    | 16-64         | Self-reported              | National                   |
|                                                                        | Tervise Arengu Instituut, Health behaviour among Estonian adult population                    | 2004         | 1299        | 1743   | 16-64         | Self-reported              | National                   |
|                                                                        | Tekkel et al. Health Behavior among Estonian Adult Population, 2006                           | 2006         | 1112        | 1706   | 16-64         | Self-reported              | National                   |
|                                                                        | Tekkel et al. Health Behavior among Estonian Adult Population, 2008                           | 2008         | 1248        | 1702   | 16-64         | Self-reported              | National                   |
|                                                                        | Tekkel and Veideman, Health Behaviour among Estonian Adult Population 2010                    | 2010         | 1227        | 1760   | 16-64         | Self-reported              | National                   |
| Finland                                                                | WHO; Helakorpi et al, Health behaviour among Finnish adult population, 1998                   | 1998         | 1689        | 1816   | 15-64         | Self-reported              | National                   |
|                                                                        | WHO; Helakorpi et al, Health behaviour among Finnish adult population, 1999                   | 1999         | 1523        | 1801   | 15-64         | Self-reported              | National                   |
|                                                                        | WHO; Raitarki et al, Distribution and determinants of serum high-sensitive C-reactive protein | 2001         | 1026        | 1193   | 20-39         | Self-reported              | National                   |
|                                                                        | WHO; Helakorpi et al, Health behaviour among Finnish adult population, 2002                   | 2002         | 1462        | 1757   | 15-64         | Self-reported              | National                   |
|                                                                        | WHO ; Helakorpi et al, Health behaviour among Finnish adult population, 2003                  | 2003         | 1516        | 1819   | 15-64         | Self-reported              | National                   |
|                                                                        | WHO; Helakorpi et al, Health behaviour among Finnish adult population, 2004                   | 2004         | 1520        | 1805   | 15-64         | Self-reported              | National                   |
|                                                                        | WHO; Helakorpi et al, Health behaviour among Finnish adult population, 2005                   | 2005         | 1500        | 1727   | 15-64         | Self-reported              | National                   |
|                                                                        | WHO; Helakorpi et al, Health behaviour among Finnish adult population, 2006                   | 2006         | 1450        | 1761   | 15-64         | Self-reported              | National                   |
|                                                                        | WHO; Helakorpi et al, Health behaviour among Finnish adult population, 2007                   | 2007         | 1397        | 1789   | 15-64         | Self-reported              | National                   |
|                                                                        | WHO; Helakorpi et al, Health behaviour among Finnish adult population, 2008                   | 2008         | 1346        | 1776   | 15-64         | Self-reported              | National                   |
|                                                                        | Helakorpi et al, Health behaviour among Finnish adult population, 2009                        | 2009         | 1240        | 1620   | 15-64         | Self-reported              | National                   |
| Helakorpi et al, Health behaviour among Finnish adult population, 2010 | 2010                                                                                          | 1221         | 1539        | 15-64  | Self-reported | National                   |                            |
| Helakorpi et al, Health behaviour among Finnish adult population, 2011 | 2011                                                                                          | 1181         | 1565        | 15-64  | Self-reported | National                   |                            |

| Country | Study name citation                                                                          | Data year(s) | Sample size |         | Age groups | Measured/<br>self-reported | National/<br>regional data |
|---------|----------------------------------------------------------------------------------------------|--------------|-------------|---------|------------|----------------------------|----------------------------|
|         |                                                                                              |              | M           | F       |            |                            |                            |
| France  | Maillard et al, Trends in the prevalence of obesity in the French adult population, 1999     | 1992         | 7250        | 7856    | 18-100     | Self-reported              | National                   |
|         | Enquête épidémiologique nationale sur le surpoids et l'obésité, Roche 2009                   | 1997         | -           | -       | 18-100     | Self-reported              | National                   |
|         | Enquête épidémiologique nationale sur le surpoids et l'obésité, Roche 2009                   | 2000         | -           | -       | 18-100     | Self-reported              | National                   |
|         | Enquête épidémiologique nationale sur le surpoids et l'obésité, Roche 2009                   | 2003         | 25770       |         | 18-100     | Self-reported              | National                   |
|         | Enquête épidémiologique nationale sur le surpoids et l'obésité, Roche 2009                   | 2006         | -           | -       | 18-100     | Self-reported              | National                   |
|         | Eurostat database; Health Survey 2008 France                                                 | 2008         | 3115        |         | 18-100     | Self-reported              | National                   |
|         | Enquête épidémiologique nationale sur le surpoids et l'obésité, Roche 2009                   | 2009         | -           | -       | 18-100     | Self-reported              | National                   |
| Georgia | Personal communication B. Roberts                                                            | 2001         | 874         | 994     | 18-60+     | Self-reported              | National                   |
|         | Personal communication B. Roberts                                                            | 2010         | 728         | 1134    | 18-60+     | Self-reported              | National                   |
| Germany | WHO; Hoffmester et al, National trends in risk factors for CVD in Germany, 1994              | 1991         | 2556        | 2715    | 25-69      | Measured                   | National                   |
|         | Microcensus 1999, Federal Statistics Office, personal communication                          | 1999         | 24513       | 25765   | 18-100     | Self-reported              | National                   |
|         | Microcensus 2003, Federal Statistics Office, personal communication                          | 2003         | 24222       | 25235   | 18-100     | Self-reported              | National                   |
|         | Microcensus 2005, Federal Statistics Office, personal communication                          | 2005         | 25873       | 26654   | 18-100     | Self-reported              | National                   |
|         | Nationale Verzehrs Studie II 2008, personal communication                                    | 2008         | 6117        | 7090    | 18-80      | Self-reported              | National                   |
|         | Microcensus 2009, Federal Statistics Office, personal communication                          | 2009         | 25112       | 25560   | 18-100     | Self-reported              | National                   |
| Greece  | Survey on Income & Living Conditions, Hellenic Statistical Authority, personal communication | 1998         | 4659710     | 5133801 | 15-100     | Self-reported              | National                   |
|         | Survey on Income & Living Conditions, Hellenic Statistical Authority, personal communication | 1999         | 4428897     | 4912742 | 15-100     | Self-reported              | National                   |
|         | Survey on Income & Living Conditions, Hellenic Statistical Authority, personal communication | 2000         | 4398975     | 4831754 | 15-100     | Self-reported              | National                   |
|         | Survey on Income & Living Conditions, Hellenic Statistical Authority, personal communication | 2001         | 4360600     | 4867626 | 15-100     | Self-reported              | National                   |
|         | WHO; Kapantais et al, 2004                                                                   | 2003         | 8234        | 9107    | 20-69      | Self-reported              | National                   |
|         | Survey on Income & Living Conditions, Hellenic Statistical Authority, personal communication | 2009         | 4369422     | 4618038 | 15-100     | Self-reported              | National                   |
| Hungary | WHO: Boros et al. National Health Interview Survey 2003                                      | 2003         | 2214        | 2741    | 25-64      | Self-reported              | National                   |
|         | Eurostat database: Health Interview Survey 2008 Hungary                                      | 2009         | 5051        |         | 25-64      | Self-reported              | National                   |
| Iceland | Personal communication E. Gisladdottir                                                       | 1990         | 557         | 577     | 15-80      | Self-reported              | National                   |
|         | Personal communication E. Gisladdottir                                                       | 2002         | 591         | 656     | 18-79      | Self-reported              | National                   |
|         | Personal communication E. Gisladdottir                                                       | 2007         | 2670        | 2995    | 18-79      | Self-reported              | National                   |
|         | Personal communication E. Gisladdottir                                                       | 2010         | 621         | 640     | 18-79      | Self-reported              | National                   |



| Country    | Study name citation                                                                    | Data year(s) | Sample size |       | Age groups | Measured/<br>self-reported | National/<br>regional data |
|------------|----------------------------------------------------------------------------------------|--------------|-------------|-------|------------|----------------------------|----------------------------|
|            |                                                                                        |              | M           | F     |            |                            |                            |
| Ireland    | North/South Ireland Food Consumption Survey (NSIFCS)                                   | 1998         | 2688        | 3074  | 18-64      | Self-reported              | National                   |
|            | Survey of Lifestyle, Attitudes and Nutrition in Ireland (SLAN)                         | 2002         | 2164        | 3149  | 18-100     | Self-reported              | National                   |
|            | Survey of Lifestyle, Attitudes and Nutrition in Ireland (SLAN)                         | 2007         | 942         | 1224  | 18-100     | Measured                   | National                   |
|            | Growing Up in Ireland (GUI)                                                            | 2008         | 6761        | 7799  | 18-100     | Measured                   | National                   |
|            | Combined NANS and GUI data                                                             | 2009         | 8389        | 8415  | 18-100     | Measured                   | National                   |
|            | North/South Ireland Food Consumption Survey (NSIFCS)                                   | 2010         | 361         | 375   | 18-100     | Measured                   | National                   |
| Italy      | Calza et al, Obesity and prevalence of chronic diseases, personal communication        | 2000         | 55303       | 59716 | 18-100     | Self-reported              | National                   |
|            | WHO; Istituto Nazionale Di Statistica. Stili di vita e condizioni di salute, 2004      | 2002         | 21851       | 23738 | 18-100     | Self-reported              | National                   |
|            | WHO; Istituto Nazionale Di Statistica. Stili di vita e condizioni di salute, 2004      | 2003         | 21233       | 23151 | 18-100     | Self-reported              | National                   |
|            | WHO; Gallus et al, Overweight and obesity in Italian adults, 2004                      | 2004         | 1407        | 1525  | 18-100     | Self-reported              | National                   |
|            | WHO; Istituto Nazionale Di Statistica. Health conditions and risk factors, 2007        | 2005         | 19384       | 21165 | 18-100     | Self-reported              | National                   |
|            | Istituto Nazionale Di Statistica . La vita quotidiana nel 2006, personal communication | 2006         | 19378       | 21169 | 18-100     | Self-reported              | National                   |
|            | Istat database, personal communication                                                 | 2007         | 19187       | 20822 | 25-100     | Self-reported              | National                   |
|            | Istat database, personal communication                                                 | 2008         | 23522       | 25437 | 18-100     | Self-reported              | National                   |
|            | Istat database, personal communication                                                 | 2009         | 23689       | 25592 | 18-100     | Self-reported              | National                   |
|            | Istat database, personal communication                                                 | 2010         | 19151       | 21060 | 25-100     | Self-reported              | National                   |
| Israel     | Keinar-Boken et al, 2005                                                               | 2000         | 1371        | 1410  | 15-64      | Self-reported              | National                   |
|            | Personal communication with A. Ifrah                                                   | 2002         | 3029        | 3287  | 18-64      | Self-reported              | National                   |
|            | Personal communication with A. Ifrah                                                   | 2004         | 1455        | 1910  | 18-64      | Self-reported              | National                   |
|            | Personal communication with A. Ifrah                                                   | 2008         | 1987        | 2199  | 21-64      | Self-reported              | National                   |
|            | Personal communication with N. Goldberger                                              | 2009         | 4880        | 5451  | 21-64      | Self-reported              | National                   |
| Kazakhstan | WHO: Demographic and Health Survey                                                     | 1999         | -           | 2238  | 15-49      | Measured                   | National                   |
|            | Personal communication B. Roberts                                                      | 2001         | 802         | 986   | 18-60+     | Self-reported              | National                   |
|            | Personal communication B. Roberts                                                      | 2010         | 851         | 939   | 18-60+     | Self-reported              | National                   |
|            | Personal communication S. Tazhybayev                                                   | 2012         | 1299        | 2430  | 15-65+     | Measured                   | National                   |
| Kyrgyzstan | WHO: Popkin BM and Martinchik AN, 1994                                                 | 1993         | 2267        | 2647  | 18-100     | Measured                   | National                   |
|            | WHO: Demographic and Health Survey                                                     | 1997         | -           | 3518  | 15-49      | Measured                   | National                   |
|            | Personal communication B. Roberts                                                      | 2001         | 845         | 988   | 18-60+     | Self-reported              | National                   |
|            | Personal communication B. Roberts                                                      | 2010         | 870         | 930   | 18-60+     | Self-reported              | National                   |

| Country                                                                   | Study name citation                                                         | Data year(s) | Sample size |        | Age groups    | Measured/<br>self-reported | National/<br>regional data |
|---------------------------------------------------------------------------|-----------------------------------------------------------------------------|--------------|-------------|--------|---------------|----------------------------|----------------------------|
|                                                                           |                                                                             |              | M           | F      |               |                            |                            |
| Latvia                                                                    | Pudule et al. Health behaviour among Latvian adult population, 2002         | 2002         | 856         | 1091   | 15-64         | Self-reported              | National                   |
|                                                                           | Unpublished data obtained from Dace Krievkalne                              | 2003         | 3189        | 3647   | 20-74         | Self-reported              | National                   |
|                                                                           | Pudule et al. Health behaviour among Latvian adult population, 2004         | 2004         | 742         | 1014   | 15-74         | Self-reported              | National                   |
|                                                                           | Pudule et al. Health behaviour among Latvian adult population, 2006         | 2006         | 665         | 873    | 15-74         | Self-reported              | National                   |
|                                                                           | Eurostat database: European Health Interview Survey 2008 Latvia             | 2008         | 2867        | 3591   | 18-94         | Self-reported              | National                   |
| Lithuania                                                                 | WHO; Grabauskas et al, 1998                                                 | 1998         | 811         | 1044   | 20-64         | Self-reported              | National                   |
|                                                                           | WHO; Grabauskas et al, 2000                                                 | 2000         | 989         | 1183   | 20-64         | Self-reported              | National                   |
|                                                                           | Grabauskas et al. Lithuanian health behaviour monitoring, 2002              | 2002         | 1650        | 1027   | 20-64         | Self-reported              | National                   |
|                                                                           | Grabauskas et al. Health Behaviour among Lithuanian adult population, 2004  | 2004         | 757         | 1009   | 20-64         | Self-reported              | National                   |
|                                                                           | Unpublished data obtained from Sigita Mačiukienė                            | 2005         | 3801        | 5707   | 15-100        | Self-reported              | National                   |
|                                                                           | Grabauskas et al. Health Behaviour among Lithuanian Adult Population, 2006  | 2006         | 704         | 1001   | 20-64         | Self-reported              | National                   |
|                                                                           | Grabauskas et al, Health Behaviur among Lithuanian Adult Population, 2008   | 2008         | 715         | 994    | 20-64         | Self-reported              | National                   |
| Grabauskas et al, Health Behaviur among Lithuanian Adult Population, 2010 | 2010                                                                        | 578          | 1359        | 20-64  | Self-reported | National                   |                            |
| Luxembourg                                                                | Tchicaya and Lorentz, Vivre au Luxembourg, 2010                             | 1995         | -           | -      | 16-64         | Self-reported              | National                   |
|                                                                           | Tchicaya and Lorentz, Vivre au Luxembourg, 2010                             | 2005         | -           | -      | 16-64         | Self-reported              | National                   |
|                                                                           | Tchicaya and Lorentz, Vivre au Luxembourg, 2010                             | 2008         | -           | -      | 16-64         | Self-reported              | National                   |
| Malta                                                                     | WHO; Asciak et al, The first national health interview survey, 2003         | 2002         | 1844        | 2022   | 16-100        | Self-reported              | National                   |
|                                                                           | National Health Survey 2007, personal communication                         | 2007         | 151898      | 161082 | 18-65         | Self-reported              | National                   |
|                                                                           | Eurostat database: European Health Interview Survey 2008 Malta              | 2008         | -           | -      | 18-100        | Self-reported              | National                   |
| Monaco                                                                    | No BMI data, France proxy adjusted for Monaco population size and structure |              |             |        |               |                            |                            |
| Montenegro                                                                | WHO: Health status and health needs in Serbia., 2002                        | 2000         | 4458        | 4975   | 20-100        | Measured                   | National                   |
|                                                                           | Estimated from Global Burden of Disease mean data <sup>2</sup>              | 2008         |             |        |               |                            |                            |

| Country                                       | Study name citation                                                            | Data year(s) | Sample size |        | Age groups    | Measured/<br>self-reported | National/<br>regional data |
|-----------------------------------------------|--------------------------------------------------------------------------------|--------------|-------------|--------|---------------|----------------------------|----------------------------|
|                                               |                                                                                |              | M           | F      |               |                            |                            |
| Netherlands                                   | Netherlands Central Bureau voor de Statistiek                                  | 2000         | -           | -      | 16-100        | Self-reported              | National                   |
|                                               | Netherlands Central Bureau voor de Statistiek                                  | 2001         | -           | -      | 16-100        | Self-reported              | National                   |
|                                               | Netherlands Central Bureau voor de Statistiek                                  | 2002         | -           | -      | 16-100        | Self-reported              | National                   |
|                                               | Netherlands Central Bureau voor de Statistiek                                  | 2003         | -           | -      | 16-100        | Self-reported              | National                   |
|                                               | Netherlands Central Bureau voor de Statistiek                                  | 2004         | -           | -      | 16-100        | Self-reported              | National                   |
|                                               | Netherlands Central Bureau voor de Statistiek                                  | 2005         | -           | -      | 16-100        | Self-reported              | National                   |
|                                               | Netherlands Central Bureau voor de Statistiek                                  | 2006         | -           | -      | 16-100        | Self-reported              | National                   |
|                                               | Netherlands Central Bureau voor de Statistiek                                  | 2007         | -           | -      | 16-100        | Self-reported              | National                   |
|                                               | Netherlands Central Bureau voor de Statistiek                                  | 2008         | -           | -      | 16-100        | Self-reported              | National                   |
|                                               | Netherlands Central Bureau voor de Statistiek                                  | 2009         | -           | -      | 16-100        | Self-reported              | National                   |
|                                               | Netherlands Central Bureau voor de Statistiek                                  | 2010         | -           | -      | 16-100        | Self-reported              | National                   |
| Netherlands Central Bureau voor de Statistiek | 2011                                                                           | -            | -           | 16-100 | Self-reported | National                   |                            |
| Norway                                        | WHO: Johansson et al, 1998                                                     | 1994         | 1461        | 1559   | 16-100        | Self-reported              | National                   |
|                                               | Health Interview Survey                                                        | 1998         | 3456        | 3669   | 16-100        | Self-reported              | National                   |
|                                               | Health Interview Survey                                                        | 2002         | 3410        | 3417   | 16-100        | Self-reported              | National                   |
|                                               | WHO: Hougen HC, 2006                                                           | 2005         | 3401        | 3365   | 16-100        | Self-reported              | National                   |
|                                               | WHO: Wilhelmsen , 2009                                                         | 2008         | 3172        | 3293   | 16-100        | Self-reported              | National                   |
| Poland                                        | WHO; CINDI 2003                                                                | 1992         | 792         | 904    | 25-64         | Measured                   | Subnational                |
|                                               | Eurostat database: National Health Interview Survey for Poland                 | 1996         | 3137        | 9411   | 15-100        | Self-reported              | National                   |
|                                               | Szponar et al. Household food consumption and anthropometric survey, 2003      | 2001         | 1949        |        | 19-100        | Both                       | National                   |
|                                               | Statistical Office Poland, personal communication                              | 2004         | 19335       | 19446  | 15-70         | Self-reported              | National                   |
|                                               | Statistical Office Poland, personal communication                              | 2009         | 11932       | 14673  | 15-70         | Self-reported              | National                   |
| Portugal                                      | Marques-Vidal et al, Ten-year trends in overweight and obesity 1995-2005; 2011 | 1996         | 38504       |        | 18-75         | Self-reported              | National                   |
|                                               | Marques-Vidal et al, Ten-year trends in overweight and obesity 1995-2005; 2011 | 1999         | 38688       |        | 18-75         | Self-reported              | National                   |
|                                               | WHO; Carmo et al, Overweigh and obesity in Portugal, 2008                      | 2004         | 8116        |        | 18-64         | Both                       | National                   |
|                                               | Marques-Vidal et al, Ten-year trends in overweight and obesity 1995-2005; 2011 | 2006         | 25348       |        | 18-75         | Self-reported              | National                   |
| Republic of Moldova                           | Personal communication B. Roberts                                              | 2001         | 816         | 973    | 18-60+        | Self-reported              | National                   |
|                                               | Demographic and Health Survey                                                  | 2005         | -           | 7062   | 15-49         | Measured                   | National                   |
|                                               | Personal communication B. Roberts                                              | 2010         | 744         | 967    | 18-60+        | Self-reported              | National                   |
| Romania                                       | Eurostat database: National Health Interview Survey 2002 Romania               | 2000         |             | 21200  | 15-100        | Self-reported              | National                   |
|                                               | Eurostat database: European Health Interview Survey 2008 Romania               | 2008         |             | 18172  | 18-100        | Self-reported              | National                   |

1  
2  
3  
4  
5  
6  
7  
8  
9  
10  
11  
12  
13  
14  
15  
16  
17  
18  
19  
20  
21  
22  
23  
24  
25  
26  
27  
28  
29  
30  
31  
32  
33  
34  
35  
36  
37  
38  
39  
40  
41  
42  
43  
44  
45  
46  
47

| Country                                                                   | Study name citation                                                           | Data year(s) | Sample size |        | Age groups    | Measured/self-reported | National/regional data |
|---------------------------------------------------------------------------|-------------------------------------------------------------------------------|--------------|-------------|--------|---------------|------------------------|------------------------|
|                                                                           |                                                                               |              | M           | F      |               |                        |                        |
| Russian Federation                                                        | Russia Longitudinal Monitoring Survey, University of North Carolina, 2011     | 1995         | 3364        | 4445   | 20-80+        | Self-reported          | National               |
|                                                                           | Russia Longitudinal Monitoring Survey, University of North Carolina, 2011     | 1996         | 3288        | 4382   | 20-80+        | Self-reported          | National               |
|                                                                           | Russia Longitudinal Monitoring Survey, University of North Carolina, 2011     | 1999         | 3399        | 4494   | 20-80+        | Self-reported          | National               |
|                                                                           | Russia Longitudinal Monitoring Survey, University of North Carolina, 2011     | 2000         | 3497        | 4719   | 20-80+        | Self-reported          | National               |
|                                                                           | Russia Longitudinal Monitoring Survey, University of North Carolina, 2011     | 2001         | 3859        | 5328   | 20-80+        | Self-reported          | National               |
|                                                                           | Russia Longitudinal Monitoring Survey, University of North Carolina, 2011     | 2002         | 4034        | 5484   | 20-80+        | Self-reported          | National               |
|                                                                           | Russia Longitudinal Monitoring Survey, University of North Carolina, 2011     | 2003         | 4089        | 5570   | 20-80+        | Self-reported          | National               |
|                                                                           | Russia Longitudinal Monitoring Survey, University of North Carolina, 2011     | 2004         | 4113        | 5593   | 20-80+        | Self-reported          | National               |
|                                                                           | Russia Longitudinal Monitoring Survey, University of North Carolina, 2011     | 2005         | 3997        | 5436   | 20-80+        | Self-reported          | National               |
|                                                                           | Russia Longitudinal Monitoring Survey, University of North Carolina, 2011     | 2006         | 4969        | 6609   | 20-80+        | Self-reported          | National               |
| Russia Longitudinal Monitoring Survey, University of North Carolina, 2011 | 2007                                                                          | 4950         | 6587        | 20-80+ | Self-reported | National               |                        |
| Russia Longitudinal Monitoring Survey, University of North Carolina, 2011 | 2008                                                                          | 4693         | 6402        | 20-80+ | Self-reported | National               |                        |
| Russia Longitudinal Monitoring Survey, University of North Carolina, 2011 | 2009                                                                          | 4708         | 6427        | 20-80+ | Self-reported | National               |                        |
| San Marino                                                                | No BMI data, Italy proxy adjusted for Monaco population size and structure    |              |             |        |               |                        |                        |
| Serbia                                                                    | Grujic et al, 2002                                                            | 2000         | 4458        | 4974   | 20-100        | Measured               | National               |
|                                                                           | Unpublished data obtained from Tatjana Pavlica                                | 2001-07      | 1865        | 2382   | 20-100        | Measured               | Regional               |
| Slovakia                                                                  | Eurostat database: National Health Interview Survey 2002 Slovakia             | 2002         | 1569        |        | 15-64         | Self-reported          | National               |
|                                                                           | Annual Health Report, Slovak Public Health Authority, personal communication  | 2006         | 1393        | 1443   | 15-65         | Self-reported          | National               |
|                                                                           | Eurostat database: European Health Interview Survey 2008 Slovakia             | 2009         | 1457        | 1423   | 15-65         | Self-reported          | National               |
|                                                                           | Annual Health Report , Slovak Public Health Authority, personal communication | 2010         | 1437        | 1438   | 15-65         | Self-reported          | National               |
| Slovenia                                                                  | Eurostat database: National Health Interview Survey 2002 Slovenia             | 2001         | 1097        |        | 15-100        | Self-reported          | National               |
|                                                                           | Eurostat database: European Health Interview Survey 2008 Slovenia             | 2007         | 2118        |        | 18-100        | Self-reported          | National               |
| Spain                                                                     | National Statistics Institute online database, National Health Survey 2003    | 2003         | 16296       | 17248  | 18-100        | Self-reported          | National               |
|                                                                           | National Statistics Institute online database, National Health Survey 2006    | 2006         | 16911       | 16478  | 18-100        | Self-reported          | National               |
|                                                                           | National Statistics Institute online database, National Health Survey 2009    | 2009         | 17558       | 17718  | 18-100        | Self-reported          | National               |

| Country        | Study name citation                                                                 | Data year(s) | Sample size |       | Age groups | Measured/<br>self-reported | National/<br>regional<br>data |
|----------------|-------------------------------------------------------------------------------------|--------------|-------------|-------|------------|----------------------------|-------------------------------|
|                |                                                                                     |              | M           | F     |            |                            |                               |
| Sweden         | WHO; Swedish Survey of Living Conditions                                            | 1999         | 5587        | 5762  | 16-84      | Self-reported              | National                      |
|                | WHO; Swedish Survey of Living Conditions                                            | 2001         | 5515        | 5838  | 16-84      | Self-reported              | National                      |
|                | Statistics Sweden, personal communication                                           | 2004         | 2742        | 2849  | 16-84      | Self-reported              | National                      |
|                | Statistics Sweden, personal communication                                           | 2008         | 11118       |       | 16-84      | Self-reported              | National                      |
|                | WHO; Enkätundersökning 2009, Det nationella urvalet                                 | 2009         | 4570        | 5604  | 16-84      | Self-reported              | National                      |
|                | Statistics Sweden, personal communication                                           | 2011         | 2633        | 2914  | 16-100     | Self-reported              | National                      |
| Switzerland    | WHO: Enquete Suisse sur la Sante 2003                                               | 1992         | 6749        | 8150  | 15-100     | Self-reported              | National                      |
|                | WHO: Enquete Suisse sur la Sante 2003                                               | 1997         | 6716        | 7105  | 15-100     | Self-reported              | National                      |
|                | WHO: Enquete Suisse sur la Sante 2003                                               | 2002         | 8843        | 10629 | 15-100     | Self-reported              | National                      |
|                | WHO: Enquete Suisse sur la Sante 2009                                               | 2007         | 8339        | 10134 | 15-100     | Self-reported              | National                      |
| Tajikistan     | Estimated from Global Burden of Disease mean data <sup>2</sup><br>1995 through 2008 | 1995-2008    |             |       |            |                            |                               |
| TFYR Macedonia | Estimated from Global Burden of Disease mean data <sup>2</sup><br>1995 through 2008 | 1995-2008    |             |       |            |                            |                               |
| Turkey         | Erem et al, 2001                                                                    | 1998/99      | 1324        | 1322  | 20-100     | Measured                   | Subnational                   |
|                | Turkish Obesity and Hypertension Study, Hatemi et al, 2003                          | 1999-2000    | 15144       | 4975  | 20-100     | Measured                   | Subnational                   |
|                | Yumuk et al, 2005                                                                   | 2001         | 5866        | 7000  | 20-100     | Measured                   | Subnational                   |
|                | Erem et al, 2004                                                                    | 2001-2002    | 2288        | 2728  | 20-69      | Measured                   | Subnational                   |
|                | Oguz et al, 2008                                                                    | 2004-2005    | 2110        | 2154  | 20-100     | Measured                   | National                      |
|                | Iseri et al, 2008                                                                   | 2007         | 2263        | 1942  | 20-85      | Measured                   | National                      |
| Turkmenistan   | Estimated from Global Burden of Disease mean data <sup>3</sup><br>1995 through 2008 | 1995-2008    |             |       |            |                            |                               |
| Ukraine        | WHO: CINDI programme, 2003                                                          | 1995         | 788         | 892   | 25-64      | Measured                   | Subnational                   |
|                | Personal communication B. Roberts                                                   | 2001         | 830         | 1229  | 18-60+     | Self-reported              | National                      |
|                | WHO: Kravchenko et al, 2005                                                         | 2002         | -           | 856   | 15-49      | Measured                   | National                      |
|                | Personal communication B. Roberts                                                   | 2010         | 794         | 1098  | 18-60+     | Self-reported              | National                      |

1  
2  
3  
4  
5  
6  
7  
8  
9  
10  
11  
12  
13  
14  
15  
16  
17  
18  
19  
20  
21  
22  
23  
24  
25  
26  
27  
28  
29  
30  
31  
32  
33  
34  
35  
36  
37  
38  
39  
40  
41  
42  
43  
44  
45  
46  
47

| Country    | Study name citation                                                                             | Data year(s) | Sample size |      | Age groups | Measured/<br>self-reported | National/<br>regional data |
|------------|-------------------------------------------------------------------------------------------------|--------------|-------------|------|------------|----------------------------|----------------------------|
|            |                                                                                                 |              | M           | F    |            |                            |                            |
| UK         | Health Survey for England                                                                       | 2000         | 3260        | 3703 | 16-100     | Measured                   | National                   |
|            | Health Survey for England                                                                       | 2001         | 6267        | 7414 | 16-100     | Measured                   | National                   |
|            | Health Survey for England                                                                       | 2002         | 2969        | 3509 | 16-100     | Measured                   | National                   |
|            | Health Survey for England                                                                       | 2003         | 6519        | 6570 | 16-100     | Measured                   | National                   |
|            | Health Survey for England                                                                       | 2004         | 2772        | 2812 | 16-100     | Measured                   | National                   |
|            | Health Survey for England                                                                       | 2005         | 3144        | 3184 | 16-100     | Measured                   | National                   |
|            | Health Survey for England                                                                       | 2006         | 6014        | 6074 | 16-100     | Measured                   | National                   |
|            | Health Survey for England                                                                       | 2007         | 3008        | 2983 | 16-100     | Measured                   | National                   |
|            | Health Survey for England                                                                       | 2008         | 6385        | 6450 | 16-100     | Measured                   | National                   |
|            | Health Survey for England                                                                       | 2009         | 2055        | 2045 | 16-100     | Measured                   | National                   |
| Uzbekistan | Health Survey for England                                                                       | 2010         | 3563        | 3523 | 16-100     | Measured                   | National                   |
|            | WHO: Demographic and Health Survey                                                              | 1996         | -           | 4038 | 15-49      | Measured                   | National                   |
|            | Demographic and Health Survey<br>Estimated from Global Burden of Disease mean data <sup>2</sup> | 2002<br>2008 | 2058        | 4967 | 15-65      | Measured                   | National                   |

<sup>1</sup> Denotes that data were taken from the WHO BMI database.

<sup>2</sup> [http://www1.imperial.ac.uk/publichealth/departments/ebs/projects/eresh/majidezzati/healthmetrics/metabolicriskfactors/metabolic\\_risk\\_factor\\_maps/](http://www1.imperial.ac.uk/publichealth/departments/ebs/projects/eresh/majidezzati/healthmetrics/metabolicriskfactors/metabolic_risk_factor_maps/)

## Appendix 2. Methodology of BMI data manipulation

### Computing BMI distribution from mean data

#### Assumptions

##### Assumption 1

For each data-year,  $y$ ,  $\log(\text{BMI})$  has a Normal distribution  $N(\mu(y), \sigma(y))$ .

##### Assumption 2

The value for  $\mu(y)$  is taken as  $\ln(\text{mean-BMI}_{\text{Ezzati}}(y))$

##### Assumption 3

The value for  $\sigma(y)$  is obtained from the HSE data for that year and age-gender group by fitting a normal distribution to the  $\log(\text{bmi})$  data and taking the ML estimate. This is a programmed function in the obesity\_distribution program

For each year these assumptions allow the computation of

$$p_{ok} \equiv P(\text{BMI} < 25) = \frac{1}{\sqrt{2\pi}\sigma(y)} \int_{-\infty}^{\ln(25)} dt \exp\left(-\frac{(t - \mu(y))^2}{2\sigma^2(y)}\right)$$

$$p_{ow} \equiv P(25 < \text{BMI} < 30) = \frac{1}{\sqrt{2\pi}\sigma(y)} \int_{\ln(25)}^{\ln(30)} dt \exp\left(-\frac{(t - \mu(y))^2}{2\sigma^2(y)}\right)$$

$$p_{ob} \equiv P(30 < \text{BMI}) = \frac{1}{\sqrt{2\pi}\sigma(y)} \int_{\ln(30)}^{\infty} dt \exp\left(-\frac{(t - \mu(y))^2}{2\sigma^2(y)}\right)$$

##### Assumption 4

The 95% confidence intervals for the 3  $p$  values above are derived from The Ezzati 95% confidence intervals for the mean, thus for  $p(\text{BMI} < 25)$

$$\frac{1}{\sqrt{2\pi}\sigma(y)} \int_{-\infty}^{\ln(25)} dt \exp\left(-\frac{(t - \mu(y) + \text{cl}(y))^2}{2\sigma^2(y)}\right) < P(\text{BMI} < 25) < \frac{1}{\sqrt{2\pi}\sigma(y)} \int_{-\infty}^{\ln(25)} dt \exp\left(-\frac{(t - \mu(y) - \text{cl}(y))^2}{2\sigma^2(y)}\right)$$

The difference between the upper and lower limits is taken as  $4\sigma_{ok}$ .

Similar relations for pre-obesity and obese give a data point for each year  $y$ :

$$\{(p_{ok}, \sigma_{ok}), (p_{ow}, \sigma_{ow}), (p_{ob}, \sigma_{ob})\}$$

#### Predicting BMI

The data set for the most recent 10 years of Ezzati data and associated HSE data  $\sigma$ -values are used as described to compile a Text Data Entry file for the obesity\_distribution program.

### Sample sizes, probabilities and variances

Imagine a population having some uniformly distributed characteristic  $q$ . The population is sampled  $N$  times resulting in  $n$  occurrences of the characteristic  $q$ . The posterior distribution of  $q$  is the beta distribution

$$p(q|N, n) = \frac{(N+1)!}{(N-n)!n!} q^n (1-q)^{N-n}$$

Equation 1

This Beta distribution is mathematically awkward to deal with directly and it is usual practice to approximate it by a Normal distribution. When it is valid to do so the best approximation is provided by a Normal distribution whose mean is the maximum likelihood estimate for  $q$  - the value for which the beta distribution has a maximum and is easily calculated as  $\hat{q} = \frac{n}{N}$ . The posterior distribution is

approximated as a Normal distribution with this value as its mean, it has the variance  $\hat{\sigma}^2 = \frac{1}{N} \hat{q}(1-\hat{q})$ .

[This approximation is obtained by writing  $q^n (1-q)^{N-n} = \exp(n \ln q + (N-n) \ln(1-q))$  and expanding the argument of the exponential as a Taylor series about  $\hat{q}$  as far as terms quadratic in  $(q - \hat{q})$ .]

This is OK provided that  $\hat{q}$  is neither very close to zero or very close to 1, in which case this approximation of  $q$ 's beta distribution as a Normal distribution with mean  $\hat{q}$  is not valid. In these circumstances it is better to approximate the posterior distribution as a Normal distribution having mean and variance as given by the actual mean and variance of the Beta distribution, namely

$$\hat{q} = \frac{(n+1)}{(N+2)}$$

$$\hat{\sigma}^2 = \frac{(n+1)(N-n+1)}{(N+1)(N+2)(N+3)}$$

Equation 2

Note that, when  $N \gg n$ , these approximations agree; Equation 2 has the advantage that  $n$  can take the value 0.

### Means and distributions

Suppose BMI is distributed in the range 15-45 and that it has a mean  $m$ . If it is assumed that the distribution,  $\rho(\text{bmi})$ , is uniform for  $15 < \text{bmi} < B$  and for  $B < \text{bmi} < 45$  then we have

$$\rho = \begin{cases} \alpha & \text{for } 15 < b < B \\ \beta & \text{for } B < b < 45 \end{cases}$$

The condition that the distribution must integrate to unity is,

$$\int_{15}^{45} \rho db = \alpha(B-15) + \beta(45-B) = 1$$

The condition that it has the required mean is,



$$\int_{15}^{45} \rho b db = \frac{1}{2}\alpha(B - 15)(B \pm 15) \pm \frac{1}{2}\beta(45 - B)(45 \pm B) = m$$

These equations can be solved for  $\alpha$  and  $\beta$ ,

$$\alpha = \frac{45 \pm B - 2m}{30(B - 15)}, \quad \beta = \frac{2m - B - 15}{30(45 - B)}$$

The probability that a person has a bmi:  $p(\text{bmi} < B) = (45 \pm B - 2m)/30$ ;  $p(\text{bmi} > B) = (2m - B - 15)/30$

When  $B=25$  these values are  $(35-m)/15$  and  $(m-20)/15$  respectively

OTF-type distributions

Suppose the distribution is

$$p(\text{bmi}) = \begin{cases} p_1, & b_0 < \text{bmi} < b_1 \\ p_2, & b_1 < \text{bmi} < b_2 \\ p_3, & b_2 < \text{bmi} < b_3 \end{cases}$$

Equation 3

Typically  $b_0=15, b_1=25, b_2=30, b_3=45$ .

Because it is a distribution, the sum of the probabilities  $\{p_i\}$  must add to 1:

$$p_1 \pm p_2 \pm p_3 = 1$$

Equation 4

The mean,  $m$ , is calculated as:

$$p_1(b_0 \pm b_1) \pm p_2(b_1 \pm b_2) \pm p_3(b_2 \pm b_3) = 2m$$

Equation 5

If we know the mean and we want to determine the 3 probabilities we need one other equation.

Suppose we know one of the  $p$ 's –  $p_3$  say. The other  $p$ -values are calculated as

$$p_1 = \frac{(b_1 \pm b_2) \pm p_3(b_3 - b_1) - 2m}{(b_2 - b_0)}, \quad p_2 = 1 - p_3 - p_1$$

If, instead, we knew  $p_1$  then the other values are given as

$$p_2 = \frac{(b_2 \pm b_3) \pm p_1(b_1 - b_2) - 2m}{(b_3 - b_1)}, \quad p_3 = 1 - p_1 - p_2$$

And, finally, if we know  $p_2$ :

$$p_3 = \frac{(b_3 \pm b_1) \pm p_2(b_2 - b_3) - 2m}{(b_1 - b_2)}, \quad p_1 = 1 - p_2 - p_3$$

[These are obtained by cyclically permuting the indices 1,2,3]

### BMI distributional data – age group standardisation

BMI data is quoted for a variety of age groups and BMI groups. The idea is to break this down into a standardised set of age groups and BMI groups. The standardised age groups will be 5 year age groups:

20-24, 25-29, 30-34, 35-39, etc.

The BMI groups will be the standard IOTF set: bmi<25 (ok), 25<bmi≤29.9 (pre-ob), bmi≥30 (ob).

#### Example

Given the measured data

| Age group | Bmi group | Year  | Sample size | probability | variance                  |
|-----------|-----------|-------|-------------|-------------|---------------------------|
| 20-39     | ok        | $Y_1$ | $N_{ok}$    | $P_{ok}$    | $P_{ok}(1-P_{ok})/N_{ok}$ |
| 20-39     | pre-ob    | $Y_1$ | $N_{po}$    | $P_{po}$    | $P_{po}(1-P_{po})/N_{po}$ |
| 20-39     | ob        | $Y_1$ | $N_{ob}$    | $P_{ob}$    | $P_{ob}(1-P_{ob})/N_{ob}$ |

We assume that the different five year age groups are uniformly distributed among the 20 year age group and that each five year age group has the same proportion of ok/pre-ob/ob as the 20 year age group. The only difference is that the sample size must be reduced appropriately for the smaller age groups.

| Age group | Bmi group | Year  | Sample size | probability | variance                   |
|-----------|-----------|-------|-------------|-------------|----------------------------|
| 20-24     | ok        | $Y_1$ | $N_{ok}/4$  | $P_{ok}$    | $4P_{ok}(1-P_{ok})/N_{ok}$ |
| 25-29     | ok        | $Y_1$ | $N_{ok}/4$  | $P_{ok}$    | $4P_{ok}(1-P_{ok})/N_{ok}$ |
| 30-34     | ok        | $Y_1$ | $N_{ok}/4$  | $P_{ok}$    | $4P_{ok}(1-P_{ok})/N_{ok}$ |
| 35-39     | ok        | $Y_1$ | $N_{ok}/4$  | $P_{ok}$    | $4P_{ok}(1-P_{ok})/N_{ok}$ |
| 20-24     | pre-ob    | $Y_1$ | $N_{po}/4$  | $P_{po}$    | $4P_{po}(1-P_{po})/N_{po}$ |
| 25-29     | pre-ob    | $Y_1$ | $N_{po}/4$  | $P_{po}$    | $4P_{po}(1-P_{po})/N_{po}$ |
| 30-34     | pre-ob    | $Y_1$ | $N_{po}/4$  | $P_{po}$    | $4P_{po}(1-P_{po})/N_{po}$ |
| 35-39     | pre-ob    | $Y_1$ | $N_{po}/4$  | $P_{po}$    | $4P_{po}(1-P_{po})/N_{po}$ |
| 20-24     | ob        | $Y_1$ | $N_{ob}/4$  | $P_{ob}$    | $4P_{ob}(1-P_{ob})/N_{ob}$ |
| 25-29     | ob        | $Y_1$ | $N_{ob}/4$  | $P_{ob}$    | $4P_{ob}(1-P_{ob})/N_{ob}$ |
| 30-34     | ob        | $Y_1$ | $N_{ob}/4$  | $P_{ob}$    | $4P_{ob}(1-P_{ob})/N_{ob}$ |
| 35-39     | ob        | $Y_1$ | $N_{ob}/4$  | $P_{ob}$    | $4P_{ob}(1-P_{ob})/N_{ob}$ |

The standardised data can then be combined for different years

#### Comparison of means

Suppose we have two means  $m_1, m_2$  with variances  $\sigma_1^2, \sigma_2^2$  which are supposed to be Normally distributed. The test for them being 'the same' is that the ratio,  $\frac{m_1 - m_2}{\sqrt{\sigma_1^2 + \sigma_2^2}}$ , should be suitably small –

typically it should lie between  $\pm 1.96$  (1.96 is approximately 2; it occurs here because 95% of a zero mean, unit variance, Normal distribution  $N(x; 0, 1)$  lies in the region  $|x| < 1.96$  .... and the normalised difference of the two means has a zero mean, unit variance, Normal distribution).

The mean of a BMI distribution of the form of Equation 3 is given by Equation 5.

For the Imperial College/Ezzati website,

<http://www1.imperial.ac.uk/publichealth/departments/ebs/projects/eresh/majidezzati/healthmetrics/metabolicriskfactors/>

the link [Download the numerical results \(by age group\)](#) produces an excel spread sheet for mean BMI values by year with 95% upper and lower UI [Uncertainty intervals].

Denoting the upper and lower UI by  $UI_{\pm}$  and  $UI_{-}$ , the associated standard deviation  $\sigma$  is given by the equation

$$\sigma = (UI_{\pm} - UI_{-})/3.92$$

So, for any given year for which we have data, the means can be tested. The value of the zero mean, unit variance residual statistic,  $\frac{m_1 - m_2}{\sqrt{\sigma_1^2 \pm \sigma_2^2}}$  should be recorded

Calculating the variance of the mean

Suppose we have a distribution (Equation 3) in which the variances of  $p_1$  and  $p_2$  are  $s_1^2$  and  $s_2^2$  respectively. The mean of the distribution is given by equation 2, the variance of the mean is given by

$$\sigma^2 = \frac{1}{4}(b_0 \pm b_1 - b_2 - b_3)^2 s_1^2 \pm \frac{1}{4}(b_1 - b_3)^2 s_2^2$$

Equation 6

The optimal inclusion of dissimilar (complementary) data

Suppose we have two measurements  $N(p_1, s_1^2)$  and  $N(p_2, s_2^2)$  for, say, the percentage obese for two sections of a community – e.g rural and urban, male and female. Suppose that the rural population has  $n_1$  members and the urban population has  $n_2$  members. Thus, a person drawn at random from the whole population has a probability  $\pi_1$  of being rural and  $\pi_2$  of being urban where

$$\pi_1 = \frac{n_1}{n_1 \pm n_2}, \quad \pi_2 = \frac{n_2}{n_1 \pm n_2}$$

The probability (and variance) the same random person being obese is

$$p(\text{obese}) = p(\text{obese}|\text{rural})p(\text{rural}) \pm p(\text{obese}|\text{urban})p(\text{urban})$$

$$p_{ob} = p_1 \pi_1 \pm p_2 \pi_2$$

$$\sigma_{ob}^2 = \pi_1^2 s_1^2 \pm \pi_2^2 s_2^2$$

The optimal combination of similar data

Suppose we have two independent measurements  $N(p_1, s_1^2)$  and  $N(p_2, s_2^2)$  of some quantity  $p$ . The

optimal (Bayesian) combination of the two is given as  $N\left(p_1 + \frac{s_1^2}{s_1^2 + s_2^2}(p_2 - p_1), \frac{s_1^2 s_2^2}{s_1^2 + s_2^2}\right)$ . The new

mean lies between the  $p_1$  and  $p_2$ ; the new variance is less than both  $s_1^2$  and  $s_2^2$ . [ $N(x, s^2)$  is a normal distribution with mean  $x$  and variance  $s^2$ .]

### Variable age grouping

We suppose that the set {a labels age groups} of distributions are  $\{p_{a1}(t), p_{a2}(t), p_{a3}(t)\}$ . We need consider only the first two values (subscripts 1 and 2 - the third is determined by the condition that the sum is unity). The probabilities, here regarded as random variables, are supposed to grow linearly with time

$$p_{ai}(t) = p_{ai}(t_0) + (t - t_0) \dot{p}_{ai}(t_0)$$

Each of these two equations can be written as the vector equation

$$\begin{pmatrix} p_{ai}(t) \\ \dot{p}_{ai}(t) \end{pmatrix} = \begin{pmatrix} 1 & t - t_0 \\ 0 & 1 \end{pmatrix} \begin{pmatrix} p_{ai}(t_0) \\ \dot{p}_{ai}(t_0) \end{pmatrix} \equiv \Phi(t - t_0) \begin{pmatrix} p_{ai}(t_0) \\ \dot{p}_{ai}(t_0) \end{pmatrix}$$

### Equation 7

The quantity  $p_a(t)$  and its time derivative are themselves random variables. Supposing they are Normally distributed and their mean and covariance are denoted  $X_{ai}$  and  $P_{ai}$  respectively, then Equation 7 implies the two matrix equations:

$$X_{ai}(t) = \Phi(t - t_0) X_{ai}(t_0)$$

$$P_{ai}(t) = \Phi(t - t_0) P_{ai}(t_0) \Phi^T(t - t_0)$$

### Equation 8

It is conventional to drop the explicit time dependence in favour of the more compact notation that relates the predicted values  $(\hat{x}, \hat{p})$  to the previous best estimate  $(\tilde{x}, \tilde{p})$

$$\hat{X}_{ai} = \Phi \tilde{X}_{ai}$$

$$\hat{P}_{ai} = \Phi \tilde{P}_{ai} \Phi^T$$

### Equation 9

At a new data point – a measurement  $z$  of  $p_{ai}(t)$  with variance  $\sigma_z^2$  say – the predicted values are optimally combined with the measured values via Bayes' rule to give the well known Kalman Bucy equations, that here can be written

$$\tilde{X}_{ai} = \hat{X}_{ai} + K(z - H \hat{X}_{ai})$$

$$\tilde{P}_{ai} = (I - KH) P_{ai}$$

$$K = \hat{P}_{ai} H^T (H \hat{P}_{ai} K^T + \sigma_z^2)^{-1}$$

$$H \equiv (1 \quad 0)$$

### Equation 10

Suppose we know the distribution at some year  $y_1$  for a consecutive set of age groups  $A_1, A_2, \dots, A_n$ .

1  
2  
3 ...to be continued  
4

5 Computing of distribution from one plot and the mean  
6

7 Assuming BMI cuts  $B_0=15$ ,  $B_1=25$ ,  $B_2=30$ ,  $B_3=45$  and a 3-dimensional BMI distribution  $\{p_1(t), p_2(t), p_3(t)\}$   
8

9 where, for all times  $t$ , the probabilities  $\{p_i\}$  must add to 1:  
10

$$11 \quad p_1 \pm p_2 \pm p_3 = 1$$

12  
13  
14 Equation 11  
15

16 Suppose at some time  $t_0$  we know the point  $\{p_1(t_0), p_2(t_0), p_3(t_0)\}$  the following equations allow for the  
17 computation of another point  $\{q_1(t_1), q_2(t_1), q_3(t_1)\}$  at some time  $t_1$ :  
18

19 At time  $t_1$  we suppose we know the mean. Further suppose that the ratio of the proportion obese to  
20 the proportion overweight remains the same, thus  
21

$$22 \quad q_3 = \lambda q_2, \quad \lambda \equiv \frac{p_3}{p_2}$$

23  
24 The  $q$ 's are now determined from the equations  
25

$$26 \quad q_1(B_0 \pm B_1) \pm q_2((B_1 \pm B_2) \pm \lambda(B_2 \pm B_3)) = 2m$$

$$27 \quad q_1 \pm q_2(1 \pm \lambda) = 1$$

28  
29 Hence  
30  
31

$$32 \quad q_2 = \frac{2m - B_0 - B_1}{(B_1 \pm B_2) \pm \lambda(B_2 \pm B_3) - (1 \pm \lambda)(B_0 \pm B_1)}$$

33  
34 etc  
35  
36

37 The variance of the new plot  $q$  can be taken to be the same as  $p$ .  
38  
39  
40  
41  
42  
43  
44

45  
46 Computation of distribution from mean and variance  
47

48 Given the mean  $m$  and variance  $v$  the distribution  $\{p_1, p_2, p_3\}$  can be computed from the equations  
49  
50  
51  
52  
53  
54  
55  
56  
57  
58  
59  
60

$$\begin{aligned}
 p_1 + p_2 + p_3 &= 1 \\
 \beta_1 p_1 + \beta_2 p_2 &= \mu \equiv 2m - b_2 - b_3 \\
 \gamma_1 p_2 + \gamma_2 p_2 &= v \equiv 3(v + m^2) \\
 \beta_1 &= b_0 + b_1 - b_2 - b_3 \\
 \beta_2 &= b_1 - b_3 \\
 \gamma_1 &= v_1 - v_3 \\
 \gamma_2 &= v_2 - v_3 \\
 v_1 &\equiv b_0^2 + b_0 b_1 + b_1^2 \\
 v_2 &\equiv b_1^2 + b_1 b_2 + b_2^2 \\
 v_3 &\equiv b_2^2 + b_2 b_3 + b_3^2
 \end{aligned}$$

Equation 12

These are solved:

$$\begin{aligned}
 \beta_1 p_1 + \beta_2 p_2 &= \mu \\
 \gamma_1 p_1 + \gamma_2 p_2 &= v \\
 &\Rightarrow \\
 p_1 &= (\mu \gamma_2 - v \beta_2) / d \\
 p_2 &= -(\mu \gamma_1 - v \beta_1) / d \\
 d &\equiv \beta_1 \gamma_2 - \gamma_1 \beta_2
 \end{aligned}$$

Equation 13

Monte Carlo trials and accuracy

Suppose N trials are performed attempting to observe a quantity whose prevalence is p and that n hits are obtained. The maximum likelihood estimate for p is

$$\hat{p} = \frac{n}{N}$$

The variance of the estimate is  $\frac{\hat{p}(1-\hat{p})}{N}$ .

Suppose that p is small,  $p=10^{-k}$  for  $k=1,2,3,4,\dots$  and that  $N=10^K$ , typically  $K=6,7,8,\dots$  then the standard deviation,  $\sigma$ , of the estimate is approximately

$$\sigma = \sqrt{\frac{\hat{p}(1-\hat{p})}{N}} \approx 10^{-\frac{1}{2}(k+K)} \text{ and the 'accuracy', } \frac{\sigma}{\hat{p}} \approx 10^{-\frac{1}{2}(K-k)}.$$

For example, the number of trials to achieve an accuracy of 1 part in 100 is determined as

$$\frac{1}{2}(K - k) = 2 \text{ or } K=4 \pm k.$$

Hence the rule: the smaller the prevalence being observed; the larger the number of trials that is necessary.

More precisely stated: to observe a prevalence of  $10^{-k}$  to an accuracy of one part in  $10^A$  ( $A=1,2,3,\dots$ ) will require  $10^{2A \pm k}$  Monte Carlo trials.

An individual's body mass index (BMI) is defined as:

$$BMI = \frac{w}{h^2},$$

where  $w$  and  $h$  correspond to individual's weight and height, respectively.  $BMI$  provides a simple measure of a person's "fatness" or "thinness". Although  $BMI$  is measured on a continuous scale, it is grouped in the following five categories:

- 1)  $BMI$ : <18.5 (underweight)
- 2)  $BMI$  from 18.5 to 24.99: (healthy weight)
- 3)  $BMI$  from 25 to 29.99: (overweight)
- 4)  $BMI$  from 30 to 39.99: (obese)
- 5)  $BMI \geq 40$ : (morbidly obese)

Let  $g=1,\dots,5$ , denote  $BMI$  group (lower and larger values of  $g$  correspond to groups with lower and larger values of  $BMI$  on the continuous scale, respectively). Let  $q_g(t)$  be the prevalence of individuals with  $BMI$  values that correspond to group  $g$  at time  $t$ . To ensure that  $q_g(t)$  takes values within  $[0,1]$ , we model  $q_g(t)$  by

$$q_g(t) = \frac{1}{2} [1 + \tanh(\beta_0^g + \beta_1^g t)]. \quad (1)$$

An alternative way to estimate  $q_g(t)$  is through a logistic regression model with percentage for  $BMI$  group  $g$  as the outcome, and time,  $t$ , as the single explanatory variable:

$$\ln\left(\frac{q_g(t)}{1-q_g(t)}\right) = \beta_0^g + \beta_1^g t. \quad (2)$$

By solving equation (2) for  $q_g(t)$  we obtain

$$q_g(t) = \frac{\exp(\beta_0^g + \beta_1^g t)}{1 + \exp(\beta_0^g + \beta_1^g t)}.$$

Equations (1) and (2) are mathematically identical, but (1) provides greater numerical stability. Fitting separate models for the estimation of  $q_g(t)$  for each group  $g$ , does not guarantee that

$$\sum_{g=1}^5 q_g(t) = 1.$$

Thus, to ensure that the estimates of prevalence of individuals in all  $BMI$  groups sum up to 1 for each time  $t$ , we estimate the prevalence of individuals with  $BMI$  values that correspond to group  $g$  at time  $t$  by

$$P_g(t) = \frac{q_g(t)}{\sum_{g=1}^5 q_g(t)}. \quad (3)$$

### Micro simulation – BMI growth model

The distribution of BMI in the population is estimated using regression analysis stratified by both sex ( $S$ ) and age group ( $A=0-9, 10-19, 20-29, \dots, 70-79, 80+$ ). The fitted models are extrapolated to forecast the distribution of BMI groups in the future. For each sex-and-age-group stratum, the set of cross-sectional, time-dependent, discrete distributions of BMI groups,  $D = \{P_g(t) | g = 1, \dots, 5; t > 0\}$ , is used to manufacture BMI growth models for individual members of the population. This is done in a way that guarantees that the cross-sectional BMI group distributions obtained by simulation under the growth models match the BMI group distributions of the observed data. The details are as follows;

For each such discrete distribution in  $D$ , there is a continuous counterpart. Let  $\beta$  denote BMI in the continuous scale and let  $f(\beta|A, S, t)$  be the probability density function of  $\beta$  for age group  $A$  and sex  $S$  at time  $t$ . Then

$$P_g(t|A, S) = \int_{\beta \in g} f(\beta|A, S, t) d\beta. \quad (4)$$

Equations (3) and (4) both refer to the same quantity. However, equation (4) uses the definition of a probability density function to express the age-and-sex-specific percentage of individuals in BMI group  $g$  at time  $t$ . Equation (3) gives an estimate of the this quantity using model (1) for all  $g=0, \dots, 5$ . The cumulative distribution function of  $\beta$  is

$$F(\beta|A, S, t) = \int_0^\beta f(\beta|A, S, t) d\beta. \quad (5)$$

At a time  $t$ , a person with sex  $S$  belonging to the age group  $A$  is said to be on the  $p$ -th percentile of this distribution if  $F(\beta|A, S, t) = p/100$ . Given the cross-sectional information of  $D$ , it is possible to simulate longitudinal trajectories by forming pseudo cohorts within the population. A key requirement for these sets of longitudinal trajectories is that they reproduce the cross-sectional distribution of BMI groups for any year with available data. The method adopted here and in the earlier Foresight report<sup>1</sup> is based on the assumption that people's BMI changes throughout their lives in such a way that they always stay on the same BMI percentile. As they age, individuals move from one age group to another and their BMI changes so that they remain on the same percentile but of a different distribution. This rule is not too far from the truth; and has as a result that relatively fat people stay relatively fat and relatively thin people stay relatively thin. Crucially it meets the important condition that the cross-sectional BMI group distributions obtained by simulation match the BMI group distributions of the observed data. This can be seen as follows:.

<sup>1</sup> Foresight report



When the population's BMI distributions by sex and age are known for all years (by extrapolation of fitted model (3)), a person who is in age group  $A$  and who grows ten year older will at some time move into the next age group  $A'$  and will have a BMI that was described first by the distribution  $f(\beta|A, S, t)$  and then at the later time  $t'$  by the distribution  $f(\beta|A', S, t')$ . If the BMI of that individual is on the  $p^{\text{th}}$  percentile of the BMI distribution, his BMI will change from  $b$  to  $b'$  so that

$$\beta = F^{-1}\left(\frac{p}{100} \mid A, S, t\right) \quad (6)$$

$$\beta' = F^{-1}\left(\frac{p}{100} \mid A', S, t'\right) \Rightarrow \beta' = F^{-1}(F(\beta|A, S, t) \mid A', S, t') \quad (7)$$

Where  $F^{-1}$  is the inverse function of the cumulative distribution function of  $\beta$ . **Error! Reference source not found.** guarantees that the transformation taking the random variable  $b$  to  $b'$  ensures the correct cross-sectional distribution at  $t'$ .

The micro simulation both generates individuals from the BMI distributions of the set  $D$  and, once generated, grows the individual's BMI in a way that is also determined by the set  $D$ . It is possible to implement equation 7 as a suitably fast algorithm.

#### Micro simulation: Birth, disease and death models.

Simulated people are generated with the correct demographic statistics in the simulation's start-year. In this year women are stochastically allocated the number and years of birth of their children – these are generated from known fertility and mother's age at birth statistics (valid in the start-year). If a woman has children then those children are generated as members of the simulation in the appropriate birth year.

In the course of their lives, simulated people can die from one of the BMI related diseases that they might have acquired or from some other cause. The probabilities that a person of a given age and gender dies from a cause other than a BMI related disease are calculated in terms of known death and disease statistics valid in the start-year and are held constant over the course of the simulation. The death rates from BMI related diseases will change as a consequence of the population's changing BMI distribution.

1  
2  
3  
4  
5  
6  
7  
8  
9  
10  
11  
12  
13  
14  
15  
16  
17  
18  
19  
20  
21  
22  
23  
24  
25  
26  
27  
28  
29  
30  
31  
32  
33  
34  
35  
36  
37  
38  
39  
40  
41  
42  
43  
44  
45  
46  
47

Appendix 3. Table of disease reference for each country

| Country    | Disease        | Incidence                 | Prevalence        | Mortality      | Survival             |
|------------|----------------|---------------------------|-------------------|----------------|----------------------|
| Albania    | Diabetes       | Converted from prevalence | Shapo et al, 2004 | Non-fatal      | Non-fatal            |
|            | CHD            | UK proxy                  |                   | WHO, 2008      | Czech Republic proxy |
|            | Stroke         | Hungary proxy             |                   | WHO, 2008      | Estonia proxy        |
|            | Hypertension   | Shapo et al, 2004         | Shapo et al, 2004 | Non-fatal      | Non-fatal            |
|            | Osteoarthritis | UK proxy                  |                   | Non-fatal      | Non-fatal            |
|            | Cancers        |                           |                   |                |                      |
|            | Breast         | Globocan, 2008            |                   | Globocan, 2008 | Slovenia proxy       |
|            | Colorectal     | Globocan, 2008            |                   | Globocan, 2008 | Estonia proxy        |
|            | Corpus uteri   | Globocan, 2008            |                   | Globocan, 2008 | Czech proxy          |
|            | Kidney         | Globocan, 2008            |                   | Globocan, 2008 | Estonia proxy        |
|            | Liver          | Globocan, 2008            |                   | Globocan, 2008 | Lithuania proxy      |
| Oesophagus | Globocan, 2008 |                           | Globocan, 2008    | Poland proxy   |                      |
| Pancreas   | Globocan, 2008 |                           | Globocan, 2008    | Poland proxy   |                      |
| Andorra    | Diabetes       | Spain proxy               |                   | Non-fatal      | Non-fatal            |
|            | CHD            | Spain proxy               |                   | Spain proxy    | Spain proxy          |
|            | Stroke         | Spain proxy               |                   | Spain proxy    | Spain proxy          |
|            | Hypertension   | Spain proxy               |                   | Non-fatal      | Non-fatal            |
|            | Osteoarthritis | UK proxy                  |                   | Non-fatal      | Non-fatal            |
|            | Cancers        |                           |                   |                |                      |
|            | Breast         | Spain proxy               |                   | Spain proxy    | Spain proxy          |
|            | Colorectal     | Spain proxy               |                   | Spain proxy    | Spain proxy          |
|            | Corpus uteri   | Spain proxy               |                   | Spain proxy    | Spain proxy          |
|            | Kidney         | Spain proxy               |                   | Spain proxy    | Spain proxy          |
|            | Liver          | Spain proxy               |                   | Spain proxy    | Spain proxy          |
| Oesophagus | Spain proxy    |                           | Spain proxy       | Spain proxy    |                      |
| Pancreas   | Spain proxy    |                           | Spain proxy       | Spain proxy    |                      |

| Country    | Disease        | Incidence                 | Prevalence               | Mortality        | Survival               |
|------------|----------------|---------------------------|--------------------------|------------------|------------------------|
| Armenia    | Diabetes       | Converted from prevalence | Ezzati, 2008             | Non-fatal        | Non-fatal              |
|            | CHD            | Georgia proxy             |                          | WHO, 2008        | Georgia proxy          |
|            | Stroke         | Georgia proxy             |                          | WHO, 2008        | Georgia proxy          |
|            | Hypertension   | Converted from prevalence | DHS, 2005                | Non-fatal        | Non-fatal              |
|            | Osteoarthritis | UK proxy                  |                          | Non-fatal        | Non-fatal              |
|            | Cancers        |                           |                          |                  |                        |
|            | Breast         | Globocan, 2008            |                          | Globocan, 2008   | Belarus proxy          |
|            | Colorectal     | Globocan, 2008            |                          | Globocan, 2008   | Belarus proxy          |
|            | Corpus uteri   | Globocan, 2008            |                          | Globocan, 2008   | Belarus proxy          |
|            | Kidney         | Globocan, 2008            |                          | Globocan, 2008   | Belarus proxy          |
|            | Liver          | Globocan, 2008            |                          | Globocan, 2008   | Belarus proxy          |
|            | Oesophagus     | Globocan, 2008            |                          | Globocan, 2008   | Belarus proxy          |
| Pancreas   | Globocan, 2008 |                           | Globocan, 2008           | Belarus proxy    |                        |
| Austria    | Diabetes       | Converted from prevalence | Statistics Austria, 2007 | Non-fatal        | Non-fatal              |
|            | CHD            | Converted from prevalence | Statistics Austria, 2007 | WHO 2008         | UK proxy               |
|            | Stroke         | Truelsen et al, 2006      |                          | WHO 2008         | UK proxy               |
|            | Hypertension   | Converted from prevalence | Statistics Austria, 2007 | Non-fatal        | Non-fatal              |
|            | Osteoarthritis | UK proxy                  |                          | Non-fatal        | Non-fatal              |
|            | Cancers        |                           |                          |                  |                        |
|            | Breast         | Globocan, 2008            |                          | Globocan, 2008   | Verdecchia et al, 2007 |
|            | Colorectal     | Globocan, 2008            |                          | Globocan, 2008   | Verdecchia et al, 2007 |
|            | Corpus uteri   | Globocan, 2008            |                          | Globocan, 2008   | Verdecchia et al, 2007 |
|            | Kidney         | Globocan, 2008            |                          | Globocan, 2008   | Verdecchia et al, 2007 |
|            | Liver          | Globocan, 2008            |                          | Globocan, 2008   | Sant et al, 2009       |
|            | Oesophagus     | Globocan, 2008            |                          | Globocan, 2008   | Sant et al, 2009       |
| Pancreas   | Globocan, 2008 |                           | Globocan, 2008           | Sant et al, 2009 |                        |
| Azerbaijan | Diabetes       | Converted from prevalence | DHS, 2006                | Non-fatal        | Non-fatal              |
|            | CHD            | Georgia proxy             |                          | WHO, 2008        | Georgia proxy          |
|            | Stroke         | Aliyev, 2008              |                          | WHO, 2008        | Georgia proxy          |
|            | Hypertension   | Converted from prevalence | DHS, 2006                | Non-fatal        | Non-fatal              |
|            | Osteoarthritis | UK proxy                  |                          | Non-fatal        | Non-fatal              |
|            | Cancers        |                           |                          |                  |                        |
|            | Breast         | Globocan, 2008            |                          | Globocan, 2008   | Belarus proxy          |
|            | Colorectal     | Globocan, 2008            |                          | Globocan, 2008   | Belarus proxy          |
|            | Corpus uteri   | Globocan, 2008            |                          | Globocan, 2008   | Belarus proxy          |
|            | Kidney         | Globocan, 2008            |                          | Globocan, 2008   | Belarus proxy          |
|            | Liver          | Globocan, 2008            |                          | Globocan, 2008   | Belarus proxy          |
|            | Oesophagus     | Globocan, 2008            |                          | Globocan, 2008   | Belarus proxy          |
| Pancreas   | Globocan, 2008 |                           | Globocan, 2008           | Belarus proxy    |                        |

1  
2  
3  
4  
5  
6  
7  
8  
9  
10  
11  
12  
13  
14  
15  
16  
17  
18  
19  
20  
21  
22  
23  
24  
25  
26  
27  
28  
29  
30  
31  
32  
33  
34  
35  
36  
37  
38  
39  
40  
41  
42  
43  
44  
45  
46  
47

| Country                | Disease        | Incidence                 | Prevalence                       | Mortality            | Survival               |
|------------------------|----------------|---------------------------|----------------------------------|----------------------|------------------------|
| Belarus                | Diabetes       | Converted from prevalence | Ezzati, 2008                     | Non-fatal            | Non-fatal              |
|                        | CHD            | Russia proxy              |                                  | WHO, 2008            | Russia proxy           |
|                        | Stroke         | Kulesh et al, 2010        |                                  | WHO, 2008            | Kulesh et al, 2010     |
|                        | Hypertension   | Converted from prevalence | Balashenko NS, 2011              | Non-fatal            | Non-fatal              |
|                        | Osteoarthritis | UK proxy                  |                                  | Non-fatal            | Non-fatal              |
|                        | Cancers        |                           |                                  |                      |                        |
|                        | Breast         | Globocan, 2008            |                                  | Globocan, 2008       | Zalutsky et al, 2005   |
|                        | Colorectal     | Globocan, 2008            |                                  | Globocan, 2008       | Zalutsky et al, 2005   |
|                        | Corpus uteri   | Globocan, 2008            |                                  | Globocan, 2008       | Zalutsky et al, 2005   |
|                        | Kidney         | Globocan, 2008            |                                  | Globocan, 2008       | Zalutsky et al, 2005   |
|                        | Liver          | Globocan, 2008            |                                  | Globocan, 2008       | Zalutsky et al, 2005   |
| Oesophagus             | Globocan, 2008 |                           | Globocan, 2008                   | Zalutsky et al, 2005 |                        |
| Pancreas               | Globocan, 2008 |                           | Globocan, 2008                   | Zalutsky et al, 2005 |                        |
| Belgium                | Diabetes       | Converted from prevalence | Institute of Public Health, 2008 | Non-fatal            | Non-fatal              |
|                        | CHD            | Converted from prevalence | Institute of Public Health, 2008 | WHO 2008             | Euroheart, 2008        |
|                        | Stroke         | Truelsen et al, 2006      | Institute of Public Health, 2008 | WHO 2008             | UK proxy               |
|                        | Hypertension   | Converted from prevalence | Institute of Public Health, 2008 | Non-fatal            | Non-fatal              |
|                        | Osteoarthritis | Converted from prevalence | Institute of Public Health, 2008 | Non-fatal            | Non-fatal              |
|                        | Cancers        |                           |                                  |                      |                        |
|                        | Breast         | Globocan, 2008            |                                  | Globocan, 2008       | Verdecchia et al, 2007 |
|                        | Colorectal     | Globocan, 2008            |                                  | Globocan, 2008       | Verdecchia et al, 2007 |
|                        | Corpus uteri   | Globocan, 2008            |                                  | Globocan, 2008       | Verdecchia et al, 2007 |
|                        | Kidney         | Globocan, 2008            |                                  | Globocan, 2008       | Verdecchia et al, 2007 |
|                        | Liver          | Globocan, 2008            |                                  | Globocan, 2008       | Sant et al, 2009       |
| Oesophagus             | Globocan, 2008 |                           | Globocan, 2008                   | Sant et al, 2009     |                        |
| Pancreas               | Globocan, 2008 |                           | Globocan, 2008                   | Sant et al, 2009     |                        |
| Bosnia and Herzegovina | Diabetes       | Converted from prevalence | Ezzati, 2008                     | Non-fatal            | Non-fatal              |
|                        | CHD            | UK proxy                  |                                  | WHO, 2008            | Czech proxy            |
|                        | Stroke         | Converted from prevalence | Vasilj et al, 2006               | WHO, 2008            | Smajlovic at al, 2006  |
|                        | Hypertension   | Converted from prevalence | Pilav, 2006                      | Non-fatal            | Non-fatal              |
|                        | Osteoarthritis | UK proxy                  |                                  | Non-fatal            | Non-fatal              |
|                        | Cancers        |                           |                                  |                      |                        |
|                        | Breast         | Globocan, 2008            |                                  | Globocan, 2008       | Slovenia proxy         |
|                        | Colorectal     | Globocan, 2008            |                                  | Globocan, 2008       | Estonia proxy          |
|                        | Corpus uteri   | Globocan, 2008            |                                  | Globocan, 2008       | Czech proxy            |
|                        | Kidney         | Globocan, 2008            |                                  | Globocan, 2008       | Estonia proxy          |
|                        | Liver          | Globocan, 2008            |                                  | Globocan, 2008       | Lithuania proxy        |
| Oesophagus             | Globocan, 2008 |                           | Globocan, 2008                   | Poland proxy         |                        |
| Pancreas               | Globocan, 2008 |                           | Globocan, 2008                   | Poland proxy         |                        |

| Country  | Disease        | Incidence                 | Prevalence   | Mortality              | Survival                     |
|----------|----------------|---------------------------|--------------|------------------------|------------------------------|
| Bulgaria | Diabetes       | Converted from prevalence | Ezzati, 2008 | Non-fatal<br>WHO, 2008 | Non-fatal<br>Czech proxy     |
|          | CHD            | UK proxy                  |              |                        |                              |
|          | Stroke         | Powles et al, 2002        |              |                        |                              |
|          | Hypertension   | UK proxy                  |              |                        |                              |
|          | Osteoarthritis | UK proxy                  |              |                        |                              |
|          | Cancers        |                           |              |                        |                              |
|          | Breast         | Globocan, 2008            |              |                        |                              |
|          | Colorectal     | Globocan, 2008            |              |                        |                              |
|          | Corpus uteri   | Globocan, 2008            |              |                        |                              |
|          | Kidney         | Globocan, 2008            |              |                        |                              |
|          | Liver          | Globocan, 2008            |              |                        |                              |
|          | Oesophagus     | Globocan, 2008            |              |                        |                              |
|          | Pancreas       | Globocan, 2008            |              |                        |                              |
| Croatia  | Diabetes       | Converted from prevalence | Ezzati, 2008 | Non-fatal<br>WHO, 2008 | Non-fatal<br>Czech proxy     |
|          | CHD            | UK proxy                  |              |                        |                              |
|          | Stroke         | Hungary proxy             |              |                        |                              |
|          | Hypertension   | Uhernick et al, 2009      |              |                        |                              |
|          | Osteoarthritis | UK proxy                  |              |                        |                              |
|          | Cancers        |                           |              |                        |                              |
|          | Breast         | Globocan, 2008            |              |                        |                              |
|          | Colorectal     | Globocan, 2008            |              |                        |                              |
|          | Corpus uteri   | Globocan, 2008            |              |                        |                              |
|          | Kidney         | Globocan, 2008            |              |                        |                              |
|          | Liver          | Globocan, 2008            |              |                        |                              |
|          | Oesophagus     | Globocan, 2008            |              |                        |                              |
|          | Pancreas       | Globocan, 2008            |              |                        |                              |
| Cyprus   | Diabetes       | Converted from prevalence | Cystat, 2008 | Non-fatal<br>WHO 2008  | Non-fatal<br>Euroheart, 2008 |
|          | CHD            | Cystat, 2008              |              |                        |                              |
|          | Stroke         | Truelsen et al, 2006      |              |                        |                              |
|          | Hypertension   | Converted from prevalence |              |                        |                              |
|          | Osteoarthritis | Converted from prevalence |              |                        |                              |
|          | Cancers        |                           |              |                        |                              |
|          | Breast         | Globocan, 2008            |              |                        |                              |
|          | Colorectal     | Globocan, 2008            |              |                        |                              |
|          | Corpus uteri   | Globocan, 2008            |              |                        |                              |
|          | Kidney         | Globocan, 2008            |              |                        |                              |
|          | Liver          | Globocan, 2008            |              |                        |                              |
|          | Oesophagus     | Globocan, 2008            |              |                        |                              |
|          | Pancreas       | Globocan, 2008            |              |                        |                              |

1  
2  
3  
4  
5  
6  
7  
8  
9  
10  
11  
12  
13  
14  
15  
16  
17  
18  
19  
20  
21  
22  
23  
24  
25  
26  
27  
28  
29  
30  
31  
32  
33  
34  
35  
36  
37  
38  
39  
40  
41  
42  
43  
44  
45  
46  
47

| Country        | Disease        | Incidence                 | Prevalence                  | Mortality        | Survival                        |
|----------------|----------------|---------------------------|-----------------------------|------------------|---------------------------------|
| Czech Republic | Diabetes       | Converted from prevalence | Ezzati, 2008                | Non-fatal        | Non-fatal                       |
|                | CHD            | UK proxy                  |                             | WHO 2008         | Euroheart, 2008                 |
|                | Stroke         | Truelsen et al, 2006      |                             | WHO 2008         | Estonia proxy                   |
|                | Hypertension   | UK proxy                  |                             | Non-fatal        | Non-fatal                       |
|                | Osteoarthritis | UK proxy                  |                             | Non-fatal        | Non-fatal                       |
|                | Cancers        |                           |                             |                  |                                 |
|                | Breast         | Globocan, 2008            |                             | Globocan, 2008   | Verdecchia et al, 2007          |
|                | Colorectal     | Globocan, 2008            |                             | Globocan, 2008   | Verdecchia et al, 2007          |
|                | Corpus uteri   | Globocan, 2008            |                             | Globocan, 2008   | Verdecchia et al, 2007          |
|                | Kidney         | Globocan, 2008            |                             | Globocan, 2008   | Verdecchia et al, 2007          |
|                | Liver          | Globocan, 2008            |                             | Globocan, 2008   | Sant et al, 2009                |
| Oesophagus     | Globocan, 2008 | Globocan, 2008            | Globocan, 2008              | Sant et al, 2009 |                                 |
| Pancreas       | Globocan, 2008 | Globocan, 2008            | Globocan, 2008              | Sant et al, 2009 |                                 |
| Denmark        | Diabetes       | Steno 2010                | National Health Survey 2010 | Non-fatal        | Non-fatal                       |
|                | CHD            | Converted from prevalence |                             | WHO 2008         | Euroheart, 2008                 |
|                | Stroke         | Truelsen et al, 2006      |                             | WHO 2008         | EU Chronic Disease Report, 2007 |
|                | Hypertension   | Converted from prevalence |                             | Non-fatal        | Non-fatal                       |
|                | Osteoarthritis | Converted from prevalence |                             | Non-fatal        | Non-fatal                       |
|                | Cancers        |                           |                             |                  |                                 |
|                | Breast         | Globocan, 2008            |                             | Globocan, 2008   | Sant et al, 2009                |
|                | Colorectal     | Globocan, 2008            |                             | Globocan, 2008   | Sant et al, 2009                |
|                | Corpus uteri   | Globocan, 2008            |                             | Globocan, 2008   | Sant et al, 2009                |
|                | Kidney         | Globocan, 2008            |                             | Globocan, 2008   | Sant et al, 2009                |
|                | Liver          | Globocan, 2008            |                             | Globocan, 2008   | Sant et al, 2009                |
| Oesophagus     | Globocan, 2008 | Globocan, 2008            | Globocan, 2008              | Sant et al, 2009 |                                 |
| Pancreas       | Globocan, 2008 | Globocan, 2008            | Globocan, 2008              | Sant et al, 2009 |                                 |
| Estonia        | Diabetes       | Converted from prevalence | Ezzati, 2008                | Non-fatal        | Non-fatal                       |
|                | CHD            | UK proxy                  |                             | WHO 2008         | Czech proxy                     |
|                | Stroke         | Truelsen et al, 2006      |                             | WHO 2008         | Vibo et al, 2007                |
|                | Hypertension   | UK proxy                  |                             | Non-fatal        | Non-fatal                       |
|                | Osteoarthritis | UK proxy                  |                             | Non-fatal        | Non-fatal                       |
|                | Cancers        |                           |                             |                  |                                 |
|                | Breast         | Globocan, 2008            |                             | Globocan, 2008   | Gondos et al, 2008              |
|                | Colorectal     | Globocan, 2008            |                             | Globocan, 2008   | Gondos et al, 2008              |
|                | Corpus uteri   | Globocan, 2008            |                             | Globocan, 2008   | Gondos et al, 2008              |
|                | Kidney         | Globocan, 2008            |                             | Globocan, 2008   | Gondos et al, 2008              |
|                | Liver          | Globocan, 2008            |                             | Globocan, 2008   | Gondos et al, 2008              |
| Oesophagus     | Globocan, 2008 | Globocan, 2008            | Gondos et al, 2008          |                  |                                 |
| Pancreas       | Globocan, 2008 | Globocan, 2008            | Gondos et al, 2008          |                  |                                 |

| Country  | Disease        | Incidence                    | Prevalence                                            | Mortality        | Survival               |
|----------|----------------|------------------------------|-------------------------------------------------------|------------------|------------------------|
| Finland  | Diabetes       | Finnish Health Survey, 2011  | Finnish Health Survey, 2000                           | Non-fatal        | Non-fatal              |
|          | CHD            | THL/KTL database, 2009       |                                                       | WHO 2008         | THL database 2008      |
|          | Stroke         | Truelsen et al, 2006         |                                                       | WHO 2008         | THL database 2008      |
|          | Hypertension   | Finnish Health Survey, 2011  |                                                       | Non-fatal        | Non-fatal              |
|          | Osteoarthritis | Converted from prevalence    |                                                       | Non-fatal        | Non-fatal              |
|          | Cancers        |                              |                                                       |                  |                        |
|          | Breast         | Globocan, 2008               |                                                       | Globocan, 2008   | Verdecchia et al, 2007 |
|          | Colorectal     | Globocan, 2008               |                                                       | Globocan, 2008   | Verdecchia et al, 2007 |
|          | Corpus uteri   | Globocan, 2008               |                                                       | Globocan, 2008   | Verdecchia et al, 2007 |
|          | Kidney         | Globocan, 2008               |                                                       | Globocan, 2008   | Verdecchia et al, 2007 |
|          | Liver          | Globocan, 2008               |                                                       | Globocan, 2008   | Sant et al, 2009       |
|          | Oesophagus     | Globocan, 2008               |                                                       | Globocan, 2008   | Sant et al, 2009       |
| Pancreas | Globocan, 2008 | Globocan, 2008               | Globocan, 2008                                        | Sant et al, 2009 |                        |
| France   | Diabetes       | Personal comm. INVS, 2006    | Personal comm. Entred, 2009                           | Non-fatal        | Non-fatal              |
|          | CHD            | UK proxy                     |                                                       | WHO 2008         | Euroheart, 2008        |
|          | Stroke         | Truelsen et al, 2006         |                                                       | WHO 2008         | UK proxy               |
|          | Hypertension   | Radi et al, 2004             |                                                       | Non-fatal        | Non-fatal              |
|          | Osteoarthritis | UK proxy                     |                                                       | Non-fatal        | Non-fatal              |
|          | Cancers        |                              |                                                       |                  |                        |
|          | Breast         | Globocan, 2008               |                                                       | Globocan, 2008   | Verdecchia et al, 2007 |
|          | Colorectal     | Globocan, 2008               |                                                       | Globocan, 2008   | Verdecchia et al, 2007 |
|          | Corpus uteri   | Globocan, 2008               |                                                       | Globocan, 2008   | Verdecchia et al, 2007 |
|          | Kidney         | Globocan, 2008               |                                                       | Globocan, 2008   | Verdecchia et al, 2007 |
|          | Liver          | Globocan, 2008               |                                                       | Globocan, 2008   | Sant et al, 2009       |
|          | Oesophagus     | Globocan, 2008               |                                                       | Globocan, 2008   | Sant et al, 2009       |
| Pancreas | Globocan, 2008 | Globocan, 2008               | Globocan, 2008                                        | Sant et al, 2009 |                        |
| Georgia  | Diabetes       | Converted from prevalence    | Ezzati, 2008<br><br>Personal communication B. Roberts | Non-fatal        | Non-fatal              |
|          | CHD            | Iskadze et al, 2011          |                                                       | WHO, 2008        | NCDC, 2009             |
|          | Stroke         | Tsiskaridze et al, 2000-2003 |                                                       | WHO, 2008        | Tsiskaridze et al      |
|          | Hypertension   | Converted from prevalence    |                                                       | Non-fatal        | Non-fatal              |
|          | Osteoarthritis | UK proxy                     |                                                       | Non-fatal        | Non-fatal              |
|          | Cancers        |                              |                                                       |                  |                        |
|          | Breast         | Globocan, 2008               |                                                       | Globocan, 2008   | NCDC, 2010             |
|          | Colorectal     | Globocan, 2008               |                                                       | Globocan, 2008   | Belarus proxy          |
|          | Corpus uteri   | Globocan, 2008               |                                                       | Globocan, 2008   | Belarus proxy          |
|          | Kidney         | Globocan, 2008               |                                                       | Globocan, 2008   | Belarus proxy          |
|          | Liver          | Globocan, 2008               |                                                       | Globocan, 2008   | Belarus proxy          |
|          | Oesophagus     | Globocan, 2008               |                                                       | Globocan, 2008   | Belarus proxy          |
| Pancreas | Globocan, 2008 | Globocan, 2008               | Globocan, 2008                                        | Belarus proxy    |                        |

| Country | Disease        | Incidence                 | Prevalence   | Mortality      | Survival               |
|---------|----------------|---------------------------|--------------|----------------|------------------------|
| Germany | Diabetes       | Wilke et al 2012 (2008)   |              | Non-fatal      | Non-fatal              |
|         | CHD            | UK proxy                  |              | WHO 2008       | Euroheart, 2008        |
|         | Stroke         | Truelsen et al, 2006      |              | WHO 2008       | UK proxy               |
|         | Hypertension   | UK proxy                  |              | Non-fatal      | Non-fatal              |
|         | Osteoarthritis | UK proxy                  |              | Non-fatal      | Non-fatal              |
|         | Cancers        |                           |              |                |                        |
|         | Breast         | Globocan, 2008            |              | Globocan, 2008 | Verdecchia et al, 2007 |
|         | Colorectal     | Globocan, 2008            |              | Globocan, 2008 | Verdecchia et al, 2007 |
|         | Corpus uteri   | Globocan, 2008            |              | Globocan, 2008 | Verdecchia et al, 2007 |
|         | Kidney         | Globocan, 2008            |              | Globocan, 2008 | Verdecchia et al, 2007 |
|         | Liver          | Globocan, 2008            |              | Globocan, 2008 | Sant et al, 2009       |
|         | Oesophagus     | Globocan, 2008            |              | Globocan, 2008 | Sant et al, 2009       |
|         | Pancreas       | Globocan, 2008            |              | Globocan, 2008 | Sant et al, 2009       |
| Greece  | Diabetes       | Converted from prevalence | Ezzati, 2008 | Non-fatal      | Non-fatal              |
|         | CHD            | UK proxy                  |              | WHO 2008       | UK proxy               |
|         | Stroke         | Truelsen et al, 2006      |              | WHO 2008       | UK proxy               |
|         | Hypertension   | UK proxy                  |              | Non-fatal      | Non-fatal              |
|         | Osteoarthritis | UK proxy                  |              | Non-fatal      | Non-fatal              |
|         | Cancers        |                           |              |                |                        |
|         | Breast         | Globocan, 2008            |              | Globocan, 2008 | France proxy           |
|         | Colorectal     | Globocan, 2008            |              | Globocan, 2008 | France proxy           |
|         | Corpus uteri   | Globocan, 2008            |              | Globocan, 2008 | France proxy           |
|         | Kidney         | Globocan, 2008            |              | Globocan, 2008 | France proxy           |
|         | Liver          | Globocan, 2008            |              | Globocan, 2008 | France proxy           |
|         | Oesophagus     | Globocan, 2008            |              | Globocan, 2008 | France proxy           |
|         | Pancreas       | Globocan, 2008            |              | Globocan, 2008 | France proxy           |
| Hungary | Diabetes       | Converted from prevalence | Ezzati, 2008 | Non-fatal      | Non-fatal              |
|         | CHD            | UK proxy                  |              | WHO 2008       | Czech proxy            |
|         | Stroke         | Truelsen et al, 2006      |              | WHO 2008       | Estonia proxy          |
|         | Hypertension   | UK proxy                  |              | Non-fatal      | Non-fatal              |
|         | Osteoarthritis | UK proxy                  |              | Non-fatal      | Non-fatal              |
|         | Cancers        |                           |              |                |                        |
|         | Breast         | Globocan, 2008            |              | Globocan, 2008 | Slovenia proxy         |
|         | Colorectal     | Globocan, 2008            |              | Globocan, 2008 | Estonia proxy          |
|         | Corpus uteri   | Globocan, 2008            |              | Globocan, 2008 | Czech proxy            |
|         | Kidney         | Globocan, 2008            |              | Globocan, 2008 | Estonia proxy          |
|         | Liver          | Globocan, 2008            |              | Globocan, 2008 | Lithuania proxy        |
|         | Oesophagus     | Globocan, 2008            |              | Globocan, 2008 | Poland proxy           |
|         | Pancreas       | Globocan, 2008            |              | Globocan, 2008 | Poland proxy           |



| Country  | Disease        | Incidence                 | Prevalence               | Mortality              | Survival                              |
|----------|----------------|---------------------------|--------------------------|------------------------|---------------------------------------|
| Iceland  | Diabetes       | Converted from prevalence | Ezzati, 2008             | Non-fatal<br>WHO, 2008 | Non-fatal<br>Euroheart, 2012          |
|          | CHD            | UK proxy                  |                          |                        |                                       |
|          | Stroke         | Truelsen et al, 2006      | Ingvarsson et al, 1999   | Non-fatal<br>WHO, 2008 | Non-fatal<br>Euroheart, 2012          |
|          | Hypertension   | UK proxy                  |                          |                        |                                       |
|          | Osteoarthritis | Converted from prevalence |                          | Non-fatal              | Non-fatal                             |
|          | Cancers        |                           |                          |                        |                                       |
|          | Breast         | Globocan, 2008            |                          | Globocan, 2008         | Verdecchia et al, 2007                |
|          | Colorectal     | Globocan, 2008            |                          | Globocan, 2008         | Verdecchia et al, 2007                |
|          | Corpus uteri   | Globocan, 2008            |                          | Globocan, 2008         | Verdecchia et al, 2007                |
|          | Kidney         | Globocan, 2008            |                          | Globocan, 2008         | Verdecchia et al, 2007                |
|          | Liver          | Globocan, 2008            |                          | Globocan, 2008         | Sant et al, 2009                      |
|          | Oesophagus     | Globocan, 2008            |                          | Globocan, 2008         | Sant et al, 2009                      |
| Pancreas | Globocan, 2008 | Globocan, 2008            | Globocan, 2008           | Sant et al, 2009       |                                       |
| Ireland  | Diabetes       | Converted from prevalence | Personal comm. L. Keaver | Non-fatal<br>WHO 2008  | Non-fatal<br>Personal comm. L. Keaver |
|          | CHD            | Personal comm. L. Keaver  |                          |                        |                                       |
|          | Stroke         | Truelsen et al, 2006      | Personal comm. L. Keaver | Non-fatal<br>WHO 2008  | Non-fatal<br>Personal comm. L. Keaver |
|          | Hypertension   | Converted from prevalence |                          |                        |                                       |
|          | Osteoarthritis | Converted from prevalence |                          | Non-fatal              | Non-fatal                             |
|          | Cancers        |                           |                          |                        |                                       |
|          | Breast         | Globocan, 2008            |                          | Globocan, 2008         | Verdecchia et al, 2007                |
|          | Colorectal     | Globocan, 2008            |                          | Globocan, 2008         | Verdecchia et al, 2007                |
|          | Corpus uteri   | Globocan, 2008            |                          | Globocan, 2008         | Verdecchia et al, 2007                |
|          | Kidney         | Globocan, 2008            |                          | Globocan, 2008         | Verdecchia et al, 2007                |
|          | Liver          | Globocan, 2008            |                          | Globocan, 2008         | Sant et al, 2009                      |
|          | Oesophagus     | Globocan, 2008            |                          | Globocan, 2008         | Sant et al, 2009                      |
| Pancreas | Globocan, 2008 | Globocan, 2008            | Globocan, 2008           | Sant et al, 2009       |                                       |
| Italy    | Diabetes       | Converted from prevalence | Ezzati, 2008             | Non-fatal<br>WHO 2008  | Non-fatal<br>Euroheart, 2008          |
|          | CHD            | UK proxy                  |                          |                        |                                       |
|          | Stroke         | Truelsen et al, 2006      | Ezzati, 2008             | Non-fatal<br>WHO 2008  | EU chronic disease report, 2007       |
|          | Hypertension   | UK proxy                  |                          |                        |                                       |
|          | Osteoarthritis | UK proxy                  |                          | Non-fatal              | Non-fatal                             |
|          | Cancers        |                           |                          |                        |                                       |
|          | Breast         | Globocan, 2008            |                          | Globocan, 2008         | Verdecchia et al, 2007                |
|          | Colorectal     | Globocan, 2008            |                          | Globocan, 2008         | Verdecchia et al, 2007                |
|          | Corpus uteri   | Globocan, 2008            |                          | Globocan, 2008         | Verdecchia et al, 2007                |
|          | Kidney         | Globocan, 2008            |                          | Globocan, 2008         | Verdecchia et al, 2007                |
|          | Liver          | Globocan, 2008            |                          | Globocan, 2008         | Gondos et al, 2008                    |
|          | Oesophagus     | Globocan, 2008            |                          | Globocan, 2008         | Gondos et al, 2008                    |
| Pancreas | Globocan, 2008 | Globocan, 2008            | Globocan, 2008           | Gondos et al, 2008     |                                       |

1  
2  
3  
4  
5  
6  
7  
8  
9  
10  
11  
12  
13  
14  
15  
16  
17  
18  
19  
20  
21  
22  
23  
24  
25  
26  
27  
28  
29  
30  
31  
32  
33  
34  
35  
36  
37  
38  
39  
40  
41  
42  
43  
44  
45  
46  
47

| Country    | Disease        | Incidence                 | Prevalence                        | Mortality         | Survival       |
|------------|----------------|---------------------------|-----------------------------------|-------------------|----------------|
| Israel     | Diabetes       | Converted from prevalence | Pers. communication N. Goldberger | Non-fatal         | Non-fatal      |
|            | CHD            | Kark et al, 2005          |                                   | Kark et al, 2005  | Ehnheart, 2009 |
|            | Stroke         | Converted from prevalence | Pers. communication N. Goldberger | WHO, 2008         | Ehnheart, 2009 |
|            | Hypertension   | Converted from prevalence | Pers. communication N. Goldberger | Non-fatal         | Non-fatal      |
|            | Osteoarthritis | UK proxy                  |                                   | Non-fatal         | Non-fatal      |
|            | Cancers        |                           |                                   |                   |                |
|            | Breast         | Globocan, 2008            |                                   | Globocan, 2008    |                |
|            | Colorectal     | Globocan, 2008            |                                   | Globocan, 2008    |                |
|            | Corpus uteri   | Globocan, 2008            |                                   | Globocan, 2008    |                |
|            | Kidney         | Globocan, 2008            |                                   | Globocan, 2008    |                |
|            | Liver          | Globocan, 2008            |                                   | Globocan, 2008    |                |
| Oesophagus | Globocan, 2008 |                           | Globocan, 2008                    |                   |                |
| Pancreas   | Globocan, 2008 |                           | Globocan, 2008                    | Rozen et al, 2009 |                |
| Kazakhstan | Diabetes       | Converted from prevalence | Ezzati, 2008                      | Non-fatal         | Non-fatal      |
|            | CHD            | Uzbekistan proxy          |                                   | WHO, 2008         | Georgia proxy  |
|            | Stroke         | Azerbaijan proxy          |                                   | WHO, 2008         | Georgia proxy  |
|            | Hypertension   | Converted from prevalence | Personal communication B. Roberts | Non-fatal         | Non-fatal      |
|            | Osteoarthritis | UK proxy                  |                                   | Non-fatal         | Non-fatal      |
|            | Cancers        |                           |                                   |                   |                |
|            | Breast         | Globocan, 2008            |                                   | Globocan, 2008    |                |
|            | Colorectal     | Globocan, 2008            |                                   | Globocan, 2008    |                |
|            | Corpus uteri   | Globocan, 2008            |                                   | Globocan, 2008    |                |
|            | Kidney         | Globocan, 2008            |                                   | Globocan, 2008    |                |
|            | Liver          | Globocan, 2008            |                                   | Globocan, 2008    |                |
| Oesophagus | Globocan, 2008 |                           | Globocan, 2008                    |                   |                |
| Pancreas   | Globocan, 2008 |                           | Globocan, 2008                    |                   |                |
| Kyrgyzstan | Diabetes       | Converted from prevalence | Ezzati, 2008                      | Non-fatal         | Non-fatal      |
|            | CHD            | Uzbekistan proxy          |                                   | WHO, 2008         | Georgia proxy  |
|            | Stroke         | Azerbaijan proxy          |                                   | WHO, 2008         | Georgia proxy  |
|            | Hypertension   | Converted from prevalence | Young et al, 2005                 | Non-fatal         | Non-fatal      |
|            | Osteoarthritis | UK proxy                  |                                   | Non-fatal         | Non-fatal      |
|            | Cancers        |                           |                                   |                   |                |
|            | Breast         | Globocan, 2008            |                                   | Globocan, 2008    |                |
|            | Colorectal     | Globocan, 2008            |                                   | Globocan, 2008    |                |
|            | Corpus uteri   | Globocan, 2008            |                                   | Globocan, 2008    |                |
|            | Kidney         | Globocan, 2008            |                                   | Globocan, 2008    |                |
|            | Liver          | Globocan, 2008            |                                   | Globocan, 2008    |                |
| Oesophagus | Globocan, 2008 |                           | Globocan, 2008                    |                   |                |
| Pancreas   | Globocan, 2008 |                           | Globocan, 2008                    |                   |                |

| Country    | Disease        | Incidence                 | Prevalence          | Mortality      | Survival                  |
|------------|----------------|---------------------------|---------------------|----------------|---------------------------|
| Latvia     | Diabetes       | Converted from prevalence | Ezzati, 2008        | Non-fatal      | Non-fatal                 |
|            | CHD            | UK proxy                  |                     | WHO 2008       | Czech proxy               |
|            | Stroke         | Truelsen et al, 2006      |                     | WHO 2008       | Estonia proxy             |
|            | Hypertension   | UK proxy                  |                     | Non-fatal      | Non-fatal                 |
|            | Osteoarthritis | UK proxy                  |                     | Non-fatal      | Non-fatal                 |
|            | Cancers        |                           |                     |                |                           |
|            | Breast         | Globocan, 2008            |                     | Globocan, 2008 | Slovenia proxy            |
|            | Colorectal     | Globocan, 2008            |                     | Globocan, 2008 | Estonia proxy             |
|            | Corpus uteri   | Globocan, 2008            |                     | Globocan, 2008 | Czech proxy               |
|            | Kidney         | Globocan, 2008            |                     | Globocan, 2008 | Estonia proxy             |
|            | Liver          | Globocan, 2008            |                     | Globocan, 2008 | Lithuania proxy           |
|            | Oesophagus     | Globocan, 2008            |                     | Globocan, 2008 | Poland proxy              |
|            | Pancreas       | Globocan, 2008            |                     | Globocan, 2008 | Poland proxy              |
| Lithuania  | Diabetes       | Converted from prevalence | Ezzati, 2008        | Non-fatal      | Non-fatal                 |
|            | CHD            | UK proxy                  |                     | WHO 2008       | Euroheart, 2008           |
|            | Stroke         | Truelsen et al, 2006      |                     | WHO 2008       | EU chronic disease report |
|            | Hypertension   | UK proxy                  |                     | Non-fatal      | Non-fatal                 |
|            | Osteoarthritis | UK proxy                  |                     | Non-fatal      | Non-fatal                 |
|            | Cancers        |                           |                     |                |                           |
|            | Breast         | Globocan, 2008            |                     | Globocan, 2008 | Gondos et al, 2008        |
|            | Colorectal     | Globocan, 2008            |                     | Globocan, 2008 | Gondos et al, 2008        |
|            | Corpus uteri   | Globocan, 2008            |                     | Globocan, 2008 | Gondos et al, 2008        |
|            | Kidney         | Globocan, 2008            |                     | Globocan, 2008 | Gondos et al, 2008        |
|            | Liver          | Globocan, 2008            |                     | Globocan, 2008 | Gondos et al, 2008        |
|            | Oesophagus     | Globocan, 2008            |                     | Globocan, 2008 | Gondos et al, 2008        |
|            | Pancreas       | Globocan, 2008            |                     | Globocan, 2008 | Gondos et al, 2008        |
| Luxembourg | Diabetes       | Converted from prevalence | Alkerwi et al, 2010 | Non-fatal      | Non-fatal                 |
|            | CHD            | UK proxy                  | Alkerwi et al, 2010 | WHO 2008       | UK proxy                  |
|            | Stroke         | Truelsen et al, 2006      |                     | WHO 2008       | UK proxy                  |
|            | Hypertension   | Converted from prevalence |                     | Non-fatal      | Non-fatal                 |
|            | Osteoarthritis | UK proxy                  |                     | Non-fatal      | Non-fatal                 |
|            | Cancers        |                           |                     |                |                           |
|            | Breast         | Globocan, 2008            |                     | Globocan, 2008 | France proxy              |
|            | Colorectal     | Globocan, 2008            |                     | Globocan, 2008 | France proxy              |
|            | Corpus uteri   | Globocan, 2008            |                     | Globocan, 2008 | France proxy              |
|            | Kidney         | Globocan, 2008            |                     | Globocan, 2008 | France proxy              |
|            | Liver          | Globocan, 2008            |                     | Globocan, 2008 | France proxy              |
|            | Oesophagus     | Globocan, 2008            |                     | Globocan, 2008 | France proxy              |
|            | Pancreas       | Globocan, 2008            |                     | Globocan, 2008 | France proxy              |

| Country    | Disease        | Incidence                 | Prevalence     | Mortality        | Survival               |
|------------|----------------|---------------------------|----------------|------------------|------------------------|
| Malta      | Diabetes       | Converted from prevalence | Ezzati, 2008   | Non-fatal        | Non-fatal              |
|            | CHD            | UK proxy                  |                | WHO 2008         | UK proxy               |
|            | Stroke         | Truelsen et al, 2006      |                | WHO 2008         | UK proxy               |
|            | Hypertension   | UK proxy                  |                | Non-fatal        | Non-fatal              |
|            | Osteoarthritis | UK proxy                  |                | Non-fatal        | Non-fatal              |
|            | Cancers        |                           |                |                  |                        |
|            | Breast         | Globocan, 2008            |                | Globocan, 2008   | Verdecchia et al, 2007 |
|            | Colorectal     | Globocan, 2008            |                | Globocan, 2008   | Verdecchia et al, 2007 |
|            | Corpus uteri   | Globocan, 2008            |                | Globocan, 2008   | Verdecchia et al, 2007 |
|            | Kidney         | Globocan, 2008            |                | Globocan, 2008   | Verdecchia et al, 2007 |
|            | Liver          | Globocan, 2008            |                | Globocan, 2008   | Sant et al, 2009       |
|            | Oesophagus     | Globocan, 2008            |                | Globocan, 2008   | Sant et al, 2009       |
| Pancreas   | Globocan, 2008 | Globocan, 2008            | Globocan, 2008 | Sant et al, 2009 |                        |
| Monaco     | Diabetes       | France proxy              |                | Non-fatal        | Non-fatal              |
|            | CHD            | UK proxy                  |                | WHO, 2008        | France proxy           |
|            | Stroke         | France proxy              |                | WHO, 2008        | France proxy           |
|            | Hypertension   | France proxy              |                | Non-fatal        | Non-fatal              |
|            | Osteoarthritis | UK proxy                  |                | Non-fatal        | Non-fatal              |
|            | Cancers        |                           |                |                  |                        |
|            | Breast         | France proxy              |                | France proxy     | France proxy           |
|            | Colorectal     | France proxy              |                | France proxy     | France proxy           |
|            | Corpus uteri   | France proxy              |                | France proxy     | France proxy           |
|            | Kidney         | France proxy              |                | France proxy     | France proxy           |
|            | Liver          | France proxy              |                | France proxy     | France proxy           |
|            | Oesophagus     | France proxy              |                | France proxy     | France proxy           |
| Pancreas   | France proxy   | France proxy              | France proxy   |                  |                        |
| Montenegro | Diabetes       | Converted from prevalence | Ezzati, 2008   | Non-fatal        | Non-fatal              |
|            | CHD            | UK proxy                  |                | WHO, 2008        | Czech proxy            |
|            | Stroke         | Hungary proxy             |                | WHO, 2008        | Estonia proxy          |
|            | Hypertension   | UK proxy                  |                | Non-fatal        | Non-fatal              |
|            | Osteoarthritis | UK proxy                  |                | Non-fatal        | Non-fatal              |
|            | Cancers        |                           |                |                  |                        |
|            | Breast         | Globocan, 2008            |                | Globocan, 2008   | Slovenia proxy         |
|            | Colorectal     | Globocan, 2008            |                | Globocan, 2008   | Estonia proxy          |
|            | Corpus uteri   | Globocan, 2008            |                | Globocan, 2008   | Czech proxy            |
|            | Kidney         | Globocan, 2008            |                | Globocan, 2008   | Estonia proxy          |
|            | Liver          | Globocan, 2008            |                | Globocan, 2008   | Lithuania proxy        |
|            | Oesophagus     | Globocan, 2008            |                | Globocan, 2008   | Poland proxy           |
| Pancreas   | Globocan, 2008 | Globocan, 2008            | Globocan, 2008 | Poland proxy     |                        |

| Country     | Disease        | Incidence                          | Prevalence                                                                           | Mortality        | Survival                        |
|-------------|----------------|------------------------------------|--------------------------------------------------------------------------------------|------------------|---------------------------------|
| Netherlands | Diabetes       | Ubink-Veltmaat et al, 2003         | Ubink-Veltmaat et al, 2003 (2000)                                                    | Non-fatal        | Non-fatal                       |
|             | CHD            | Netherlands Morbidity Stats (2007) |                                                                                      | WHO 2008         | UK proxy                        |
|             | Stroke         | Truelsen et al, 2006               | Netherlands Morbidity Statistics<br>Netherlands Morbidity Statistics,<br>2011 (2007) | WHO 2008         | UK proxy                        |
|             | Hypertension   | Converted from prevalence          |                                                                                      | Non-fatal        | Non-fatal                       |
|             | Osteoarthritis | Converted from prevalence          |                                                                                      | Non-fatal        | Non-fatal                       |
|             | Cancers        |                                    |                                                                                      |                  |                                 |
|             | Breast         | Globocan, 2008                     |                                                                                      | Globocan, 2008   | Verdecchia et al, 2007          |
|             | Colorectal     | Globocan, 2008                     |                                                                                      | Globocan, 2008   | Verdecchia et al, 2007          |
|             | Corpus uteri   | Globocan, 2008                     |                                                                                      | Globocan, 2008   | Verdecchia et al, 2007          |
|             | Kidney         | Globocan, 2008                     |                                                                                      | Globocan, 2008   | Verdecchia et al, 2007          |
|             | Liver          | Globocan, 2008                     |                                                                                      | Globocan, 2008   | Sant et al, 2009                |
| Oesophagus  | Globocan, 2008 | Globocan, 2008                     | Sant et al, 2009                                                                     |                  |                                 |
| Pancreas    | Globocan, 2008 | Globocan, 2008                     | Globocan, 2008                                                                       | Sant et al, 2009 |                                 |
| Norway      | Diabetes       | Converted from prevalence          | Langhammer et al, 2012                                                               | Non-fatal        | Non-fatal                       |
|             | CHD            | Mannsverk et al, 2011              |                                                                                      | WHO, 2008        | Euroheart, 2012                 |
|             | Stroke         | Truelsen et al, 2006               | Langhammer et al, 2012<br>Langhammer et al, 2012                                     | WHO, 2008        | Euroheart, 2012                 |
|             | Hypertension   | Converted from prevalence          |                                                                                      | Non-fatal        | Non-fatal                       |
|             | Osteoarthritis | Converted from prevalence          |                                                                                      | Non-fatal        | Non-fatal                       |
|             | Cancers        |                                    |                                                                                      |                  |                                 |
|             | Breast         | Globocan, 2008                     |                                                                                      | Globocan, 2008   | Gondos et al, 2008              |
|             | Colorectal     | Globocan, 2008                     |                                                                                      | Globocan, 2008   | Gondos et al, 2008              |
|             | Corpus uteri   | Globocan, 2008                     |                                                                                      | Globocan, 2008   | Gondos et al, 2008              |
|             | Kidney         | Globocan, 2008                     |                                                                                      | Globocan, 2008   | Gondos et al, 2008              |
|             | Liver          | Globocan, 2008                     |                                                                                      | Globocan, 2008   | Gondos et al, 2008              |
| Oesophagus  | Globocan, 2008 | Globocan, 2008                     | Gondos et al, 2008                                                                   |                  |                                 |
| Pancreas    | Globocan, 2008 | Globocan, 2008                     | Gondos et al, 2008                                                                   |                  |                                 |
| Poland      | Diabetes       | Converted from prevalence          | Ezzati, 2008                                                                         | Non-fatal        | Non-fatal                       |
|             | CHD            | UK proxy                           |                                                                                      | WHO 2008         | UK proxy                        |
|             | Stroke         | Wawrzyńczyk et al, 2011            |                                                                                      | WHO 2008         | EU chronic disease report ,2007 |
|             | Hypertension   | UK proxy                           |                                                                                      | Non-fatal        | Non-fatal                       |
|             | Osteoarthritis | UK proxy                           |                                                                                      | Non-fatal        | Non-fatal                       |
|             | Cancers        |                                    |                                                                                      |                  |                                 |
|             | Breast         | Globocan, 2008                     |                                                                                      | Globocan, 2008   | Gondos et al, 2008              |
|             | Colorectal     | Globocan, 2008                     |                                                                                      | Globocan, 2008   | Gondos et al, 2008              |
|             | Corpus uteri   | Globocan, 2008                     |                                                                                      | Globocan, 2008   | Gondos et al, 2008              |
|             | Kidney         | Globocan, 2008                     |                                                                                      | Globocan, 2008   | Gondos et al, 2008              |
|             | Liver          | Globocan, 2008                     |                                                                                      | Globocan, 2008   | Gondos et al, 2008              |
| Oesophagus  | Globocan, 2008 | Globocan, 2008                     | Gondos et al, 2008                                                                   |                  |                                 |
| Pancreas    | Globocan, 2008 | Globocan, 2008                     | Gondos et al, 2008                                                                   |                  |                                 |

1  
2  
3  
4  
5  
6  
7  
8  
9  
10  
11  
12  
13  
14  
15  
16  
17  
18  
19  
20  
21  
22  
23  
24  
25  
26  
27  
28  
29  
30  
31  
32  
33  
34  
35  
36  
37  
38  
39  
40  
41  
42  
43  
44  
45  
46  
47

| Country             | Disease        | Incidence                 | Prevalence                                                             | Mortality                                                     | Survival                                                            |
|---------------------|----------------|---------------------------|------------------------------------------------------------------------|---------------------------------------------------------------|---------------------------------------------------------------------|
| Portugal            | Diabetes       | Converted from prevalence | Ezzati, 2008                                                           | Non-fatal<br>WHO 2008<br>WHO 2008<br>Non-fatal<br>Non-fatal   | Non-fatal<br>UK proxy<br>UK proxy<br>Non-fatal<br>Non-fatal         |
|                     | CHD            | UK proxy                  |                                                                        |                                                               |                                                                     |
|                     | Stroke         | Truelsen et al, 2006      |                                                                        |                                                               |                                                                     |
|                     | Hypertension   | UK proxy                  |                                                                        |                                                               |                                                                     |
|                     | Osteoarthritis | UK proxy                  |                                                                        |                                                               |                                                                     |
|                     | Cancers        |                           |                                                                        |                                                               |                                                                     |
|                     | Breast         | Globocan, 2008            |                                                                        |                                                               |                                                                     |
|                     | Colorectal     | Globocan, 2008            |                                                                        |                                                               |                                                                     |
|                     | Corpus uteri   | Globocan, 2008            |                                                                        |                                                               |                                                                     |
|                     | Kidney         | Globocan, 2008            |                                                                        |                                                               |                                                                     |
|                     | Liver          | Globocan, 2008            |                                                                        |                                                               |                                                                     |
|                     | Oesophagus     | Globocan, 2008            |                                                                        |                                                               |                                                                     |
| Pancreas            | Globocan, 2008 |                           |                                                                        |                                                               |                                                                     |
| Republic of Moldova | Diabetes       | Converted from prevalence | Ezzati, 2008<br>Ukraine proxy<br><br>Personal communication B. Roberts | Non-fatal<br>WHO, 2008<br>WHO, 2008<br>Non-fatal<br>Non-fatal | Non-fatal<br>UK proxy<br>Ukraine proxy<br>Non-fatal<br>Non-fatal    |
|                     | CHD            | Converted from prevalence |                                                                        |                                                               |                                                                     |
|                     | Stroke         | Ukraine proxy             |                                                                        |                                                               |                                                                     |
|                     | Hypertension   | Converted from prevalence |                                                                        |                                                               |                                                                     |
|                     | Osteoarthritis | UK proxy                  |                                                                        |                                                               |                                                                     |
|                     | Cancers        |                           |                                                                        |                                                               |                                                                     |
|                     | Breast         | Globocan, 2008            |                                                                        |                                                               |                                                                     |
|                     | Colorectal     | Globocan, 2008            |                                                                        |                                                               |                                                                     |
|                     | Corpus uteri   | Globocan, 2008            |                                                                        |                                                               |                                                                     |
|                     | Kidney         | Globocan, 2008            |                                                                        |                                                               |                                                                     |
|                     | Liver          | Globocan, 2008            |                                                                        |                                                               |                                                                     |
|                     | Oesophagus     | Globocan, 2008            |                                                                        |                                                               |                                                                     |
| Pancreas            | Globocan, 2008 |                           |                                                                        |                                                               |                                                                     |
| Romania             | Diabetes       | Converted from prevalence | Ezzati, 2008                                                           | Non-fatal<br>WHO 2008<br>WHO 2008<br>Non-fatal<br>Non-fatal   | Non-fatal<br>Czech proxy<br>Estonia proxy<br>Non-fatal<br>Non-fatal |
|                     | CHD            | UK proxy                  |                                                                        |                                                               |                                                                     |
|                     | Stroke         | Hungary proxy             |                                                                        |                                                               |                                                                     |
|                     | Hypertension   | UK proxy                  |                                                                        |                                                               |                                                                     |
|                     | Osteoarthritis | UK proxy                  |                                                                        |                                                               |                                                                     |
|                     | Cancers        |                           |                                                                        |                                                               |                                                                     |
|                     | Breast         | Globocan, 2008            |                                                                        |                                                               |                                                                     |
|                     | Colorectal     | Globocan, 2008            |                                                                        |                                                               |                                                                     |
|                     | Corpus uteri   | Globocan, 2008            |                                                                        |                                                               |                                                                     |
|                     | Kidney         | Globocan, 2008            |                                                                        |                                                               |                                                                     |
|                     | Liver          | Globocan, 2008            |                                                                        |                                                               |                                                                     |
|                     | Oesophagus     | Globocan, 2008            |                                                                        |                                                               |                                                                     |
| Pancreas            | Globocan, 2008 |                           |                                                                        |                                                               |                                                                     |

| Country            | Disease                                                                                    | Incidence                                                                                  | Prevalence                                                              | Mortality                                                                                                                                                                                                                                                                                                                                                                                                                                                                        | Survival                                                                                                                                                                                                                                                                                                                                                                    |
|--------------------|--------------------------------------------------------------------------------------------|--------------------------------------------------------------------------------------------|-------------------------------------------------------------------------|----------------------------------------------------------------------------------------------------------------------------------------------------------------------------------------------------------------------------------------------------------------------------------------------------------------------------------------------------------------------------------------------------------------------------------------------------------------------------------|-----------------------------------------------------------------------------------------------------------------------------------------------------------------------------------------------------------------------------------------------------------------------------------------------------------------------------------------------------------------------------|
| Russian Federation | Diabetes                                                                                   | Converted from prevalence                                                                  | Shishkin NS et al, 2005<br><br>Federal State Institute statistics, 2005 | Non-fatal<br>Boytsov SA, 2010<br>WHO, 2008<br>Non-fatal<br>Non-fatal<br><br><a href="http://www.oncology.ru">www.oncology.ru</a><br><a href="http://www.oncology.ru">www.oncology.ru</a><br><a href="http://www.oncology.ru">www.oncology.ru</a><br><a href="http://www.oncology.ru">www.oncology.ru</a><br><a href="http://www.oncology.ru">www.oncology.ru</a><br><a href="http://www.oncology.ru">www.oncology.ru</a><br><a href="http://www.oncology.ru">www.oncology.ru</a> | Non-fatal<br>Tunstall-Pedoe et al, 1999<br>Feigin et al, 1995<br>Non-fatal<br>Non-fatal<br><br><a href="http://www.mednet.ru">www.mednet.ru</a><br><a href="http://www.mednet.ru">www.mednet.ru</a><br>info.cancerresearchuk.org<br>info.cancerresearchuk.org<br>info.cancerresearchuk.org<br><a href="http://www.mednet.ru">www.mednet.ru</a><br>info.cancerresearchuk.org |
|                    | CHD                                                                                        | Boytsov SA et al, 2010                                                                     |                                                                         |                                                                                                                                                                                                                                                                                                                                                                                                                                                                                  |                                                                                                                                                                                                                                                                                                                                                                             |
|                    | Stroke                                                                                     | Feigin et al, 1995                                                                         |                                                                         |                                                                                                                                                                                                                                                                                                                                                                                                                                                                                  |                                                                                                                                                                                                                                                                                                                                                                             |
|                    | Hypertension                                                                               | Converted from prevalence                                                                  |                                                                         |                                                                                                                                                                                                                                                                                                                                                                                                                                                                                  |                                                                                                                                                                                                                                                                                                                                                                             |
|                    | Osteoarthritis                                                                             | <a href="http://www.mednet.ru">www.mednet.ru</a>                                           |                                                                         |                                                                                                                                                                                                                                                                                                                                                                                                                                                                                  |                                                                                                                                                                                                                                                                                                                                                                             |
|                    | Cancers                                                                                    |                                                                                            |                                                                         |                                                                                                                                                                                                                                                                                                                                                                                                                                                                                  |                                                                                                                                                                                                                                                                                                                                                                             |
|                    | Breast                                                                                     | <a href="http://www.oncology.ru/service/statistics">www.oncology.ru/service/statistics</a> |                                                                         |                                                                                                                                                                                                                                                                                                                                                                                                                                                                                  |                                                                                                                                                                                                                                                                                                                                                                             |
|                    | Colorectal                                                                                 | <a href="http://www.oncology.ru/service/statistics">www.oncology.ru/service/statistics</a> |                                                                         |                                                                                                                                                                                                                                                                                                                                                                                                                                                                                  |                                                                                                                                                                                                                                                                                                                                                                             |
|                    | Corpus uteri                                                                               | <a href="http://www.oncology.ru/service/statistics">www.oncology.ru/service/statistics</a> |                                                                         |                                                                                                                                                                                                                                                                                                                                                                                                                                                                                  |                                                                                                                                                                                                                                                                                                                                                                             |
|                    | Kidney                                                                                     | <a href="http://www.oncology.ru/service/statistics">www.oncology.ru/service/statistics</a> |                                                                         |                                                                                                                                                                                                                                                                                                                                                                                                                                                                                  |                                                                                                                                                                                                                                                                                                                                                                             |
|                    | Liver                                                                                      | <a href="http://www.oncology.ru/service/statistics">www.oncology.ru/service/statistics</a> |                                                                         |                                                                                                                                                                                                                                                                                                                                                                                                                                                                                  |                                                                                                                                                                                                                                                                                                                                                                             |
|                    | Oesophagus                                                                                 | <a href="http://www.oncology.ru/service/statistics">www.oncology.ru/service/statistics</a> |                                                                         |                                                                                                                                                                                                                                                                                                                                                                                                                                                                                  |                                                                                                                                                                                                                                                                                                                                                                             |
| Pancreas           | <a href="http://www.oncology.ru/service/statistics">www.oncology.ru/service/statistics</a> |                                                                                            |                                                                         |                                                                                                                                                                                                                                                                                                                                                                                                                                                                                  |                                                                                                                                                                                                                                                                                                                                                                             |
| San Marino         | Diabetes                                                                                   | Italy proxy                                                                                |                                                                         | Non-fatal<br>WHO, 2008<br>WHO, 2008<br>Non-fatal<br>Non-fatal<br><br>Personal comm.<br>Personal comm.<br>Personal comm.<br>Personal comm.<br>Personal comm.<br>Personal comm.<br>Personal comm.                                                                                                                                                                                                                                                                                  | Non-fatal<br>Italy proxy<br>Italy proxy<br>Non-fatal<br>Non-fatal<br><br>Personal comm.<br>Personal comm.<br>Italy proxy<br>Italy proxy<br>Italy proxy<br>Italy proxy<br>Personal comm.                                                                                                                                                                                     |
|                    | CHD                                                                                        | UK proxy                                                                                   |                                                                         |                                                                                                                                                                                                                                                                                                                                                                                                                                                                                  |                                                                                                                                                                                                                                                                                                                                                                             |
|                    | Stroke                                                                                     | Italy proxy                                                                                |                                                                         |                                                                                                                                                                                                                                                                                                                                                                                                                                                                                  |                                                                                                                                                                                                                                                                                                                                                                             |
|                    | Hypertension                                                                               | UK proxy                                                                                   |                                                                         |                                                                                                                                                                                                                                                                                                                                                                                                                                                                                  |                                                                                                                                                                                                                                                                                                                                                                             |
|                    | Osteoarthritis                                                                             | UK proxy                                                                                   |                                                                         |                                                                                                                                                                                                                                                                                                                                                                                                                                                                                  |                                                                                                                                                                                                                                                                                                                                                                             |
|                    | Cancers                                                                                    |                                                                                            |                                                                         |                                                                                                                                                                                                                                                                                                                                                                                                                                                                                  |                                                                                                                                                                                                                                                                                                                                                                             |
|                    | Breast                                                                                     | Personal comm. with Dr F. Masi                                                             |                                                                         |                                                                                                                                                                                                                                                                                                                                                                                                                                                                                  |                                                                                                                                                                                                                                                                                                                                                                             |
|                    | Colorectal                                                                                 | Personal comm. with Dr F. Masi                                                             |                                                                         |                                                                                                                                                                                                                                                                                                                                                                                                                                                                                  |                                                                                                                                                                                                                                                                                                                                                                             |
|                    | Corpus uteri                                                                               | Personal comm. with Dr F. Masi                                                             |                                                                         |                                                                                                                                                                                                                                                                                                                                                                                                                                                                                  |                                                                                                                                                                                                                                                                                                                                                                             |
|                    | Kidney                                                                                     | Personal comm. with Dr F. Masi                                                             |                                                                         |                                                                                                                                                                                                                                                                                                                                                                                                                                                                                  |                                                                                                                                                                                                                                                                                                                                                                             |
|                    | Liver                                                                                      | Personal comm. with Dr F. Masi                                                             |                                                                         |                                                                                                                                                                                                                                                                                                                                                                                                                                                                                  |                                                                                                                                                                                                                                                                                                                                                                             |
|                    | Oesophagus                                                                                 | Personal comm. with Dr F. Masi                                                             |                                                                         |                                                                                                                                                                                                                                                                                                                                                                                                                                                                                  |                                                                                                                                                                                                                                                                                                                                                                             |
| Pancreas           | Personal comm. with Dr F. Masi                                                             |                                                                                            |                                                                         |                                                                                                                                                                                                                                                                                                                                                                                                                                                                                  |                                                                                                                                                                                                                                                                                                                                                                             |
| Serbia             | Diabetes                                                                                   | Serbian diabetes registry, 2010                                                            |                                                                         | Non-fatal<br>ACS registry, 2010<br>WHO, 2008<br>Non-fatal<br>Non-fatal<br><br>Globocan, 2008<br>Globocan, 2008<br>Globocan, 2008<br>Globocan, 2008<br>Globocan, 2008<br>Globocan, 2008<br>Globocan, 2008                                                                                                                                                                                                                                                                         | Non-fatal<br>Czech proxy<br>Estonia proxy<br>Non-fatal<br>Non-fatal<br><br>Slovenia proxy<br>Estonia proxy<br>Czech proxy<br>Estonia proxy<br>Lithuania proxy<br>Poland proxy<br>Poland proxy                                                                                                                                                                               |
|                    | CHD                                                                                        | Acute coronary syndrome registry, 2010                                                     |                                                                         |                                                                                                                                                                                                                                                                                                                                                                                                                                                                                  |                                                                                                                                                                                                                                                                                                                                                                             |
|                    | Stroke                                                                                     | Hungary proxy                                                                              |                                                                         |                                                                                                                                                                                                                                                                                                                                                                                                                                                                                  |                                                                                                                                                                                                                                                                                                                                                                             |
|                    | Hypertension                                                                               | UK proxy                                                                                   |                                                                         |                                                                                                                                                                                                                                                                                                                                                                                                                                                                                  |                                                                                                                                                                                                                                                                                                                                                                             |
|                    | Osteoarthritis                                                                             | UK proxy                                                                                   |                                                                         |                                                                                                                                                                                                                                                                                                                                                                                                                                                                                  |                                                                                                                                                                                                                                                                                                                                                                             |
|                    | Cancers                                                                                    |                                                                                            |                                                                         |                                                                                                                                                                                                                                                                                                                                                                                                                                                                                  |                                                                                                                                                                                                                                                                                                                                                                             |
|                    | Breast                                                                                     | Globocan, 2008                                                                             |                                                                         |                                                                                                                                                                                                                                                                                                                                                                                                                                                                                  |                                                                                                                                                                                                                                                                                                                                                                             |
|                    | Colorectal                                                                                 | Globocan, 2008                                                                             |                                                                         |                                                                                                                                                                                                                                                                                                                                                                                                                                                                                  |                                                                                                                                                                                                                                                                                                                                                                             |
|                    | Corpus uteri                                                                               | Globocan, 2008                                                                             |                                                                         |                                                                                                                                                                                                                                                                                                                                                                                                                                                                                  |                                                                                                                                                                                                                                                                                                                                                                             |
|                    | Kidney                                                                                     | Globocan, 2008                                                                             |                                                                         |                                                                                                                                                                                                                                                                                                                                                                                                                                                                                  |                                                                                                                                                                                                                                                                                                                                                                             |
|                    | Liver                                                                                      | Globocan, 2008                                                                             |                                                                         |                                                                                                                                                                                                                                                                                                                                                                                                                                                                                  |                                                                                                                                                                                                                                                                                                                                                                             |
|                    | Oesophagus                                                                                 | Globocan, 2008                                                                             |                                                                         |                                                                                                                                                                                                                                                                                                                                                                                                                                                                                  |                                                                                                                                                                                                                                                                                                                                                                             |
| Pancreas           | Globocan, 2008                                                                             |                                                                                            |                                                                         |                                                                                                                                                                                                                                                                                                                                                                                                                                                                                  |                                                                                                                                                                                                                                                                                                                                                                             |



1  
2  
3  
4  
5  
6  
7  
8  
9  
10  
11  
12  
13  
14  
15  
16  
17  
18  
19  
20  
21  
22  
23  
24  
25  
26  
27  
28  
29  
30  
31  
32  
33  
34  
35  
36  
37  
38  
39  
40  
41  
42  
43  
44  
45  
46  
47

| Country    | Disease        | Incidence                                           | Prevalence                                | Mortality                                 | Survival               |
|------------|----------------|-----------------------------------------------------|-------------------------------------------|-------------------------------------------|------------------------|
| Slovakia   | Diabetes       | Preliminary 2011 data personal communication        |                                           | Non-fatal                                 | Non-fatal              |
|            | CHD            | Preliminary 2011 data (IHD), personal communication |                                           | WHO 2008                                  | Czech proxy            |
|            | Stroke         | Truelsen et al, 2006                                |                                           | WHO 2008                                  | Estonia proxy          |
|            | Hypertension   | Preliminary 2011 data personal communication        |                                           | Non-fatal                                 | Non-fatal              |
|            | Osteoarthritis | UK proxy                                            |                                           | Non-fatal                                 | Non-fatal              |
|            | Cancers        |                                                     |                                           |                                           |                        |
|            | Breast         | Globocan, 2008                                      |                                           | Globocan, 2008                            | Sant et al, 2003       |
|            | Colorectal     | Globocan, 2008                                      |                                           | Globocan, 2008                            | Estonia proxy          |
|            | Corpus uteri   | Globocan, 2008                                      |                                           | Globocan, 2008                            | Czech proxy            |
|            | Kidney         | Globocan, 2008                                      |                                           | Globocan, 2008                            | Estonia proxy          |
|            | Liver          | Globocan, 2008                                      |                                           | Globocan, 2008                            | Lithuania proxy        |
| Oesophagus | Globocan, 2008 | Globocan, 2008                                      | Poland proxy                              |                                           |                        |
| Pancreas   | Globocan, 2008 | Globocan, 2008                                      | Globocan, 2008                            | Poland proxy                              |                        |
| Slovenia   | Diabetes       | Converted from prevalence                           | Ezzati, 2008                              | Non-fatal                                 | Non-fatal              |
|            | CHD            | UK proxy                                            |                                           | WHO 2008                                  | Czech proxy            |
|            | Stroke         | Truelsen et al, 2006                                |                                           | WHO 2008                                  | Estonia proxy          |
|            | Hypertension   | UK proxy                                            |                                           | Non-fatal                                 | Non-fatal              |
|            | Osteoarthritis | UK proxy                                            |                                           | Non-fatal                                 | Non-fatal              |
|            | Cancers        |                                                     |                                           |                                           |                        |
|            | Breast         | Globocan, 2008                                      |                                           | Globocan, 2008                            | Gondos et al, 2008     |
|            | Colorectal     | Globocan, 2008                                      |                                           | Globocan, 2008                            | Gondos et al, 2008     |
|            | Corpus uteri   | Globocan, 2008                                      |                                           | Globocan, 2008                            | Gondos et al, 2008     |
|            | Kidney         | Globocan, 2008                                      |                                           | Globocan, 2008                            | Gondos et al, 2008     |
|            | Liver          | Globocan, 2008                                      |                                           | Globocan, 2008                            | Gondos et al, 2008     |
| Oesophagus | Globocan, 2008 | Globocan, 2008                                      | Gondos et al, 2008                        |                                           |                        |
| Pancreas   | Globocan, 2008 | Globocan, 2008                                      | Gondos et al, 2008                        |                                           |                        |
| Spain      | Diabetes       | Converted from prevalence                           | Encuesta Europea de Salud en Espana, 2009 | Non-fatal                                 | Non-fatal              |
|            | CHD            | Encuesta Europea de Salud en Espana                 |                                           | WHO 2008                                  | Euroheart, 2008        |
|            | Stroke         | Truelsen et al, 2006                                |                                           | WHO 2008                                  | UK proxy               |
|            | Hypertension   | Converted from prevalence                           |                                           | Encuesta Europea de Salud en Espana, 2009 | Non-fatal              |
|            | Osteoarthritis | UK proxy                                            |                                           | Non-fatal                                 | Non-fatal              |
|            | Cancers        |                                                     |                                           |                                           |                        |
|            | Breast         | Globocan, 2008                                      |                                           | Globocan, 2008                            | Verdecchia et al, 2007 |
|            | Colorectal     | Globocan, 2008                                      |                                           | Globocan, 2008                            | Verdecchia et al, 2007 |
|            | Corpus uteri   | Globocan, 2008                                      |                                           | Globocan, 2008                            | Verdecchia et al, 2007 |
|            | Kidney         | Globocan, 2008                                      |                                           | Globocan, 2008                            | Verdecchia et al, 2007 |
|            | Liver          | Globocan, 2008                                      |                                           | Globocan, 2008                            | Sant et al, 2009       |
| Oesophagus | Globocan, 2008 | Globocan, 2008                                      | Sant et al, 2009                          |                                           |                        |
| Pancreas   | Globocan, 2008 | Globocan, 2008                                      | Globocan, 2008                            | Sant et al, 2009                          |                        |



| Country     | Disease                                                                                                                                                     | Incidence                                                                                                                                                                                                                                                             | Prevalence                                                                         | Mortality                                                                                                                                                                                       | Survival                                                                                                                                                                                                                                                            |
|-------------|-------------------------------------------------------------------------------------------------------------------------------------------------------------|-----------------------------------------------------------------------------------------------------------------------------------------------------------------------------------------------------------------------------------------------------------------------|------------------------------------------------------------------------------------|-------------------------------------------------------------------------------------------------------------------------------------------------------------------------------------------------|---------------------------------------------------------------------------------------------------------------------------------------------------------------------------------------------------------------------------------------------------------------------|
| Sweden      | Diabetes<br>CHD<br>Stroke<br>Hypertension<br>Osteoarthritis<br>Cancers<br>Breast<br>Colorectal<br>Corpus uteri<br>Kidney<br>Liver<br>Oesophagus<br>Pancreas | Thunander et al, 2008<br>Statistics Sweden, 2010<br>Truelsen et al, 2006<br>Converted from prevalence<br>UK proxy<br><br>Globocan, 2008<br>Globocan, 2008<br>Globocan, 2008<br>Globocan, 2008<br>Globocan, 2008<br>Globocan, 2008<br>Globocan, 2008<br>Globocan, 2008 | Statistics Sweden, 2010                                                            | Non-fatal<br>WHO 2008<br>WHO 2008<br>Non-fatal<br>Non-fatal<br><br>Globocan, 2008<br>Globocan, 2008<br>Globocan, 2008<br>Globocan, 2008<br>Globocan, 2008<br>Globocan, 2008<br>Globocan, 2008   | Non-fatal<br>Case fatality 2010<br>EU chronic disease report 2007<br>Non-fatal<br>Non-fatal<br><br>Verdecchia et al, 2007<br>Verdecchia et al, 2007<br>Verdecchia et al, 2007<br>Verdecchia et al, 2007<br>Sant et al, 2009<br>Sant et al, 2009<br>Sant et al, 2009 |
| Switzerland | Diabetes<br>CHD<br>Stroke<br>Hypertension<br>Osteoarthritis<br>Cancers<br>Breast<br>Colorectal<br>Corpus uteri<br>Kidney<br>Liver<br>Oesophagus<br>Pancreas | Converted from prevalence<br>UK proxy<br>Truelsen et al, 2006<br>Converted from prevalence<br>UK proxy<br><br>Globocan, 2008<br>Globocan, 2008<br>Globocan, 2008<br>Globocan, 2008<br>Globocan, 2008<br>Globocan, 2008<br>Globocan, 2008<br>Globocan, 2008            | Swiss Federal Statistics Office, 2007<br><br>Swiss Federal Statistics Office, 2007 | Non-fatal<br>WHO, 2008<br>WHO, 2008<br>Non-fatal<br>Non-fatal<br><br>Globocan, 2008<br>Globocan, 2008<br>Globocan, 2008<br>Globocan, 2008<br>Globocan, 2008<br>Globocan, 2008<br>Globocan, 2008 | Non-fatal<br>Euroheart, 2012<br>Euroheart, 2012<br>Non-fatal<br>Non-fatal<br><br>Gondos et al, 2008<br>Gondos et al, 2008                             |
| Tajikistan  | Diabetes<br>CHD<br>Stroke<br>Hypertension<br>Osteoarthritis<br>Cancers<br>Breast<br>Colorectal<br>Corpus uteri<br>Kidney<br>Liver<br>Oesophagus<br>Pancreas | Converted from prevalence<br>Uzbekistan proxy<br>Azerbaijan proxy<br>Converted from prevalence<br>UK proxy<br><br>Globocan, 2008<br>Globocan, 2008<br>Globocan, 2008<br>Globocan, 2008<br>Globocan, 2008<br>Globocan, 2008<br>Globocan, 2008                          | Ezzati, 2008<br><br>Azerbaijan proxy                                               | Non-fatal<br>WHO, 2008<br>WHO, 2008<br>Non-fatal<br>Non-fatal<br><br>Globocan, 2008<br>Globocan, 2008<br>Globocan, 2008<br>Globocan, 2008<br>Globocan, 2008<br>Globocan, 2008<br>Globocan, 2008 | Non-fatal<br>Georgia proxy<br>Georgia proxy<br>Non-fatal<br>Non-fatal<br><br>Kazakhstan proxy<br>Kazakhstan proxy<br>Kazakhstan proxy<br>Kazakhstan proxy<br>Kyrgyzstan proxy<br>Kazakhstan proxy<br>Kazakhstan proxy                                               |

1  
2  
3  
4  
5  
6  
7  
8  
9  
10  
11  
12  
13  
14  
15  
16  
17  
18  
19  
20  
21  
22  
23  
24  
25  
26  
27  
28  
29  
30  
31  
32  
33  
34  
35  
36  
37  
38  
39  
40  
41  
42  
43  
44  
45  
46  
47

| Country           | Disease        | Incidence                 | Prevalence           | Mortality        | Survival           |
|-------------------|----------------|---------------------------|----------------------|------------------|--------------------|
| TFYR of Macedonia | Diabetes       | Converted from prevalence | Ezzati, 2008         | Non-fatal        | Non-fatal          |
|                   | CHD            | UK proxy                  |                      | WHO, 2008        | Slovenia proxy     |
|                   | Stroke         | Hungary proxy             |                      | WHO, 2008        | Slovenia proxy     |
|                   | Hypertension   | Albania proxy             |                      | Non-fatal        | Non-fatal          |
|                   | Osteoarthritis | UK proxy                  |                      | Non-fatal        | Non-fatal          |
|                   | Cancers        |                           |                      |                  |                    |
|                   | Breast         | Globocan, 2008            |                      | Globocan, 2008   | Slovenia proxy     |
|                   | Colorectal     | Globocan, 2008            |                      | Globocan, 2008   | Estonia proxy      |
|                   | Corpus uteri   | Globocan, 2008            |                      | Globocan, 2008   | Czech proxy        |
|                   | Kidney         | Globocan, 2008            |                      | Globocan, 2008   | Estonia proxy      |
|                   | Liver          | Globocan, 2008            |                      | Globocan, 2008   | Lithuania proxy    |
|                   | Oesophagus     | Globocan, 2008            |                      | Globocan, 2008   | Poland proxy       |
| Pancreas          | Globocan, 2008 | Globocan, 2008            | Globocan, 2008       | Poland proxy     |                    |
| Turkey            | Diabetes       | Converted from prevalence | Yumuk VD et al, 2005 | Non-fatal        | Non-fatal          |
|                   | CHD            | Converted from prevalence |                      | WHO, 2008        | Georgia proxy      |
|                   | Stroke         | Greece proxy              | Onat et al, 1993     | WHO, 2008        | Kumral et al, 1998 |
|                   | Hypertension   | Arici et al, 2010         | Non-fatal            | Non-fatal        | Non-fatal          |
|                   | Osteoarthritis | UK proxy                  | Non-fatal            | Non-fatal        | Non-fatal          |
|                   | Cancers        |                           |                      |                  |                    |
|                   | Breast         | Globocan, 2008            | Globocan, 2008       | Globocan, 2008   | Belarus proxy      |
|                   | Colorectal     | Globocan, 2008            | Globocan, 2008       | Globocan, 2008   | Belarus proxy      |
|                   | Corpus uteri   | Globocan, 2008            | Globocan, 2008       | Globocan, 2008   | Belarus proxy      |
|                   | Kidney         | Globocan, 2008            | Globocan, 2008       | Globocan, 2008   | Belarus proxy      |
|                   | Liver          | Globocan, 2008            | Globocan, 2008       | Globocan, 2008   | Belarus proxy      |
|                   | Oesophagus     | Globocan, 2008            | Globocan, 2008       | Globocan, 2008   | Belarus proxy      |
| Pancreas          | Globocan, 2008 | Globocan, 2008            | Globocan, 2008       | Belarus proxy    |                    |
| Turkmenistan      | Diabetes       | Converted from prevalence | Ezzati, 2008         | Non-fatal        | Non-fatal          |
|                   | CHD            | Uzbekistan proxy          |                      | WHO, 2008        | Georgia proxy      |
|                   | Stroke         | Azerbaijan proxy          | Azerbaijan proxy     | WHO, 2008        | Georgia proxy      |
|                   | Hypertension   | Converted from prevalence |                      | Non-fatal        | Non-fatal          |
|                   | Osteoarthritis | UK proxy                  | Non-fatal            | Non-fatal        | Non-fatal          |
|                   | Cancers        |                           |                      |                  |                    |
|                   | Breast         | Globocan, 2008            | Globocan, 2008       | Globocan, 2008   | Kazakhstan proxy   |
|                   | Colorectal     | Globocan, 2008            | Globocan, 2008       | Globocan, 2008   | Kazakhstan proxy   |
|                   | Corpus uteri   | Globocan, 2008            | Globocan, 2008       | Globocan, 2008   | Kazakhstan proxy   |
|                   | Kidney         | Globocan, 2008            | Globocan, 2008       | Globocan, 2008   | Kazakhstan proxy   |
|                   | Liver          | Globocan, 2008            | Globocan, 2008       | Globocan, 2008   | Kyrgyzstan proxy   |
|                   | Oesophagus     | Globocan, 2008            | Globocan, 2008       | Globocan, 2008   | Kazakhstan proxy   |
| Pancreas          | Globocan, 2008 | Globocan, 2008            | Globocan, 2008       | Kazakhstan proxy |                    |

| Country    | Disease                       | Incidence                     | Prevalence                    | Mortality                     | Survival               |
|------------|-------------------------------|-------------------------------|-------------------------------|-------------------------------|------------------------|
| Ukraine    | Diabetes                      | Converted from prevalence     | Ezzati, 2008                  | Non-fatal                     | Non-fatal              |
|            | CHD                           | Converted from prevalence     | Gorbas IM, 2009               | WHO, 2008                     | Russia proxy           |
|            | Stroke                        | Mihalka et al, 2001           |                               | WHO, 2008                     | Mihalka et al, 2001    |
|            | Hypertension                  | Converted from prevalence     | DHS, 2007                     | Non-fatal                     | Non-fatal              |
|            | Osteoarthritis                | Converted from prevalence     | Povorozniuk VV, 2009          | Non-fatal                     | Non-fatal              |
|            | Cancers                       |                               |                               |                               |                        |
|            | Breast                        | Globocan, 2008                |                               | Globocan, 2008                | Korchinskaya A, 2012   |
|            | Colorectal                    | Globocan, 2008                |                               | Globocan, 2008                | Belarus proxy          |
|            | Corpus uteri                  | Globocan, 2008                |                               | Globocan, 2008                | Konanaychin, 2011      |
|            | Kidney                        | Globocan, 2008                |                               | Globocan, 2008                | Kondratenko, 2009      |
|            | Liver                         | Globocan, 2008                |                               | Globocan, 2008                | Belarus proxy          |
|            | Oesophagus                    | Globocan, 2008                |                               | Globocan, 2008                | Ganul et al, 2012      |
| Pancreas   | Globocan, 2008                |                               | Globocan, 2008                | Schepotin et al, 2011         |                        |
| UK         | Diabetes                      | BHF statistics                |                               | Non-fatal                     | Non-fatal              |
|            | CHD                           | EU CVD statistics 2008        |                               | BHF statistics                | Euroheart, 2008        |
|            | Stroke                        | BHF Stroke statistics, 2009   |                               | BHF statistics                | BHF statistics         |
|            | Hypertension                  | BHF statistics                |                               | Non-fatal                     | Non-fatal              |
|            | Osteoarthritis                |                               |                               | Non-fatal                     | Non-fatal              |
|            | Cancers                       |                               |                               |                               |                        |
|            | Breast                        | UK Cancer Research statistics |                               | UK Cancer Research statistics | Verdecchia et al, 2007 |
|            | Colorectal                    | UK Cancer Research statistics |                               | UK Cancer Research statistics | Verdecchia et al, 2007 |
|            | Corpus uteri                  | UK Cancer Research statistics |                               | UK Cancer Research statistics | Verdecchia et al, 2007 |
|            | Kidney                        | UK Cancer Research statistics |                               | UK Cancer Research statistics | Verdecchia et al, 2007 |
|            | Liver                         | UK Cancer Research statistics |                               | UK Cancer Research statistics | Sant et al, 2009       |
|            | Oesophagus                    | UK Cancer Research statistics |                               | UK Cancer Research statistics | Sant et al, 2009       |
| Pancreas   | UK Cancer Research statistics |                               | UK Cancer Research statistics | Sant et al, 2009              |                        |
| Uzbekistan | Diabetes                      | Converted from prevalence     | Sultanov, 2008                | Non-fatal                     | Non-fatal              |
|            | CHD                           | Mamutov et al, 2012           |                               | WHO, 2008                     | Georgia proxy          |
|            | Stroke                        | Azerbaijan proxy              |                               | WHO, 2008                     | Georgia proxy          |
|            | Hypertension                  | Converted from prevalence     | DHS, 2002                     | Non-fatal                     | Non-fatal              |
|            | Osteoarthritis                | UK proxy                      |                               | Non-fatal                     | Non-fatal              |
|            | Cancers                       |                               |                               |                               |                        |
|            | Breast                        | Globocan, 2008                |                               | Globocan, 2008                | Kazakhstan proxy       |
|            | Colorectal                    | Globocan, 2008                |                               | Globocan, 2008                | Kazakhstan proxy       |
|            | Corpus uteri                  | Globocan, 2008                |                               | Globocan, 2008                | Kazakhstan proxy       |
|            | Kidney                        | Globocan, 2008                |                               | Globocan, 2008                | Kazakhstan proxy       |
|            | Liver                         | Globocan, 2008                |                               | Globocan, 2008                | Kyrgyzstan proxy       |
|            | Oesophagus                    | Globocan, 2008                |                               | Globocan, 2008                | Kazakhstan proxy       |
| Pancreas   | Globocan, 2008                |                               | Globocan, 2008                | Kazakhstan proxy              |                        |

### Appendix 4. Population pyramids by country in 2010

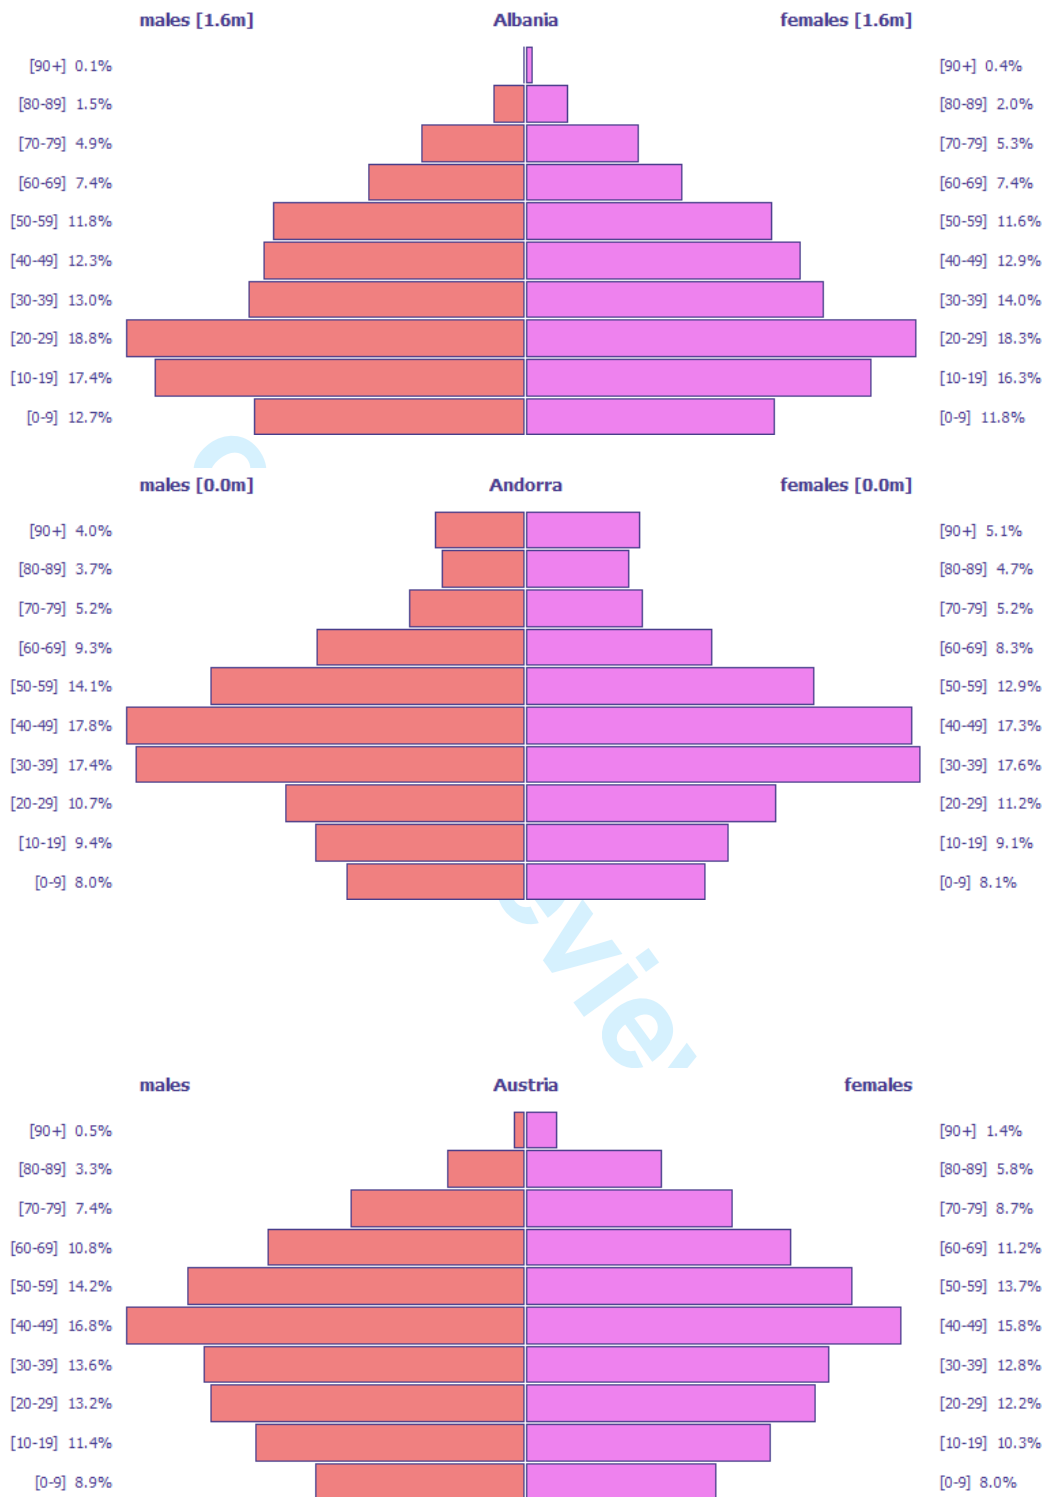

1  
2  
3  
4  
5  
6  
7  
8  
9  
10  
11  
12  
13  
14  
15  
16  
17  
18  
19  
20  
21  
22  
23  
24  
25  
26  
27  
28  
29  
30  
31  
32  
33  
34  
35  
36  
37  
38  
39  
40  
41  
42  
43  
44  
45  
46  
47  
48  
49  
50  
51  
52  
53  
54  
55  
56  
57  
58  
59  
60

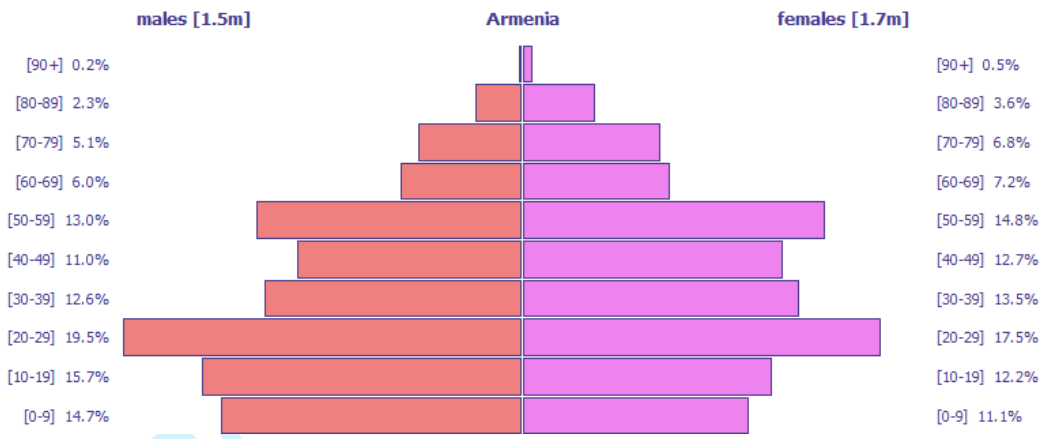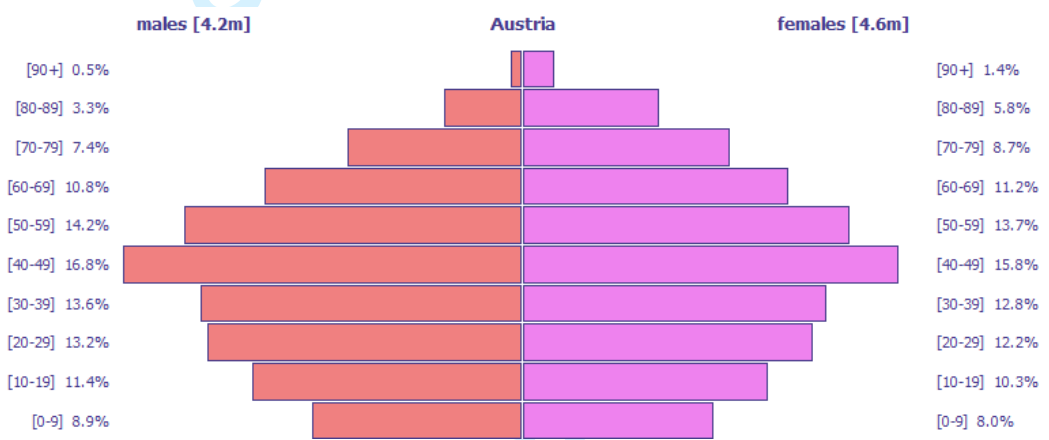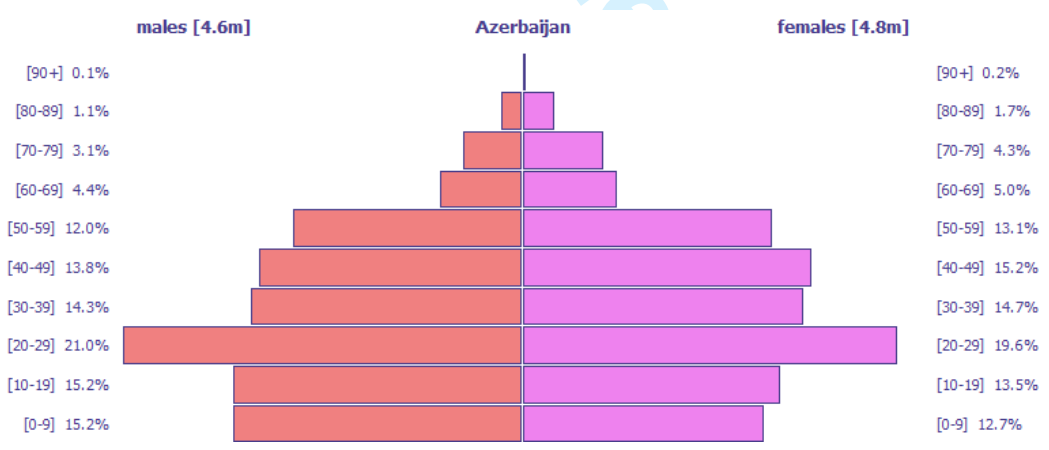

1  
2  
3  
4  
5  
6  
7  
8  
9  
10  
11  
12  
13  
14  
15  
16  
17  
18  
19  
20  
21  
22  
23  
24  
25  
26  
27  
28  
29  
30  
31  
32  
33  
34  
35  
36  
37  
38  
39  
40  
41  
42  
43  
44  
45  
46  
47  
48  
49  
50  
51  
52  
53  
54  
55  
56  
57  
58  
59  
60

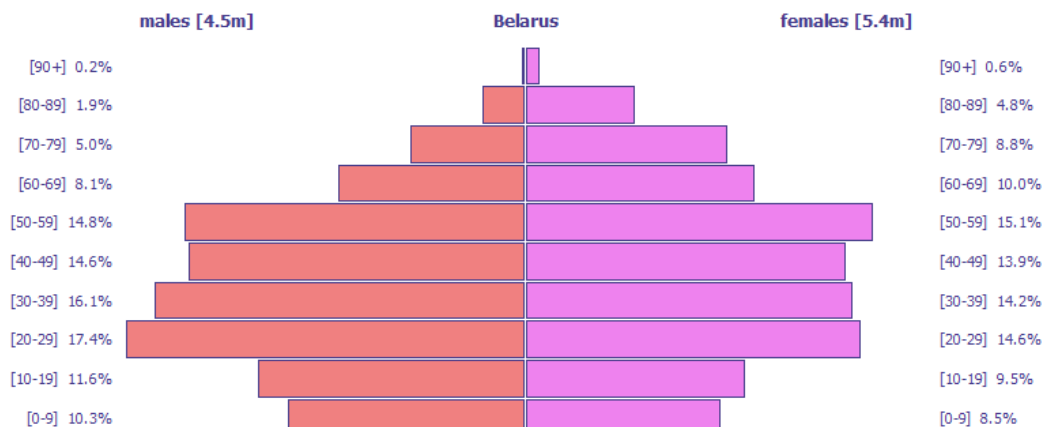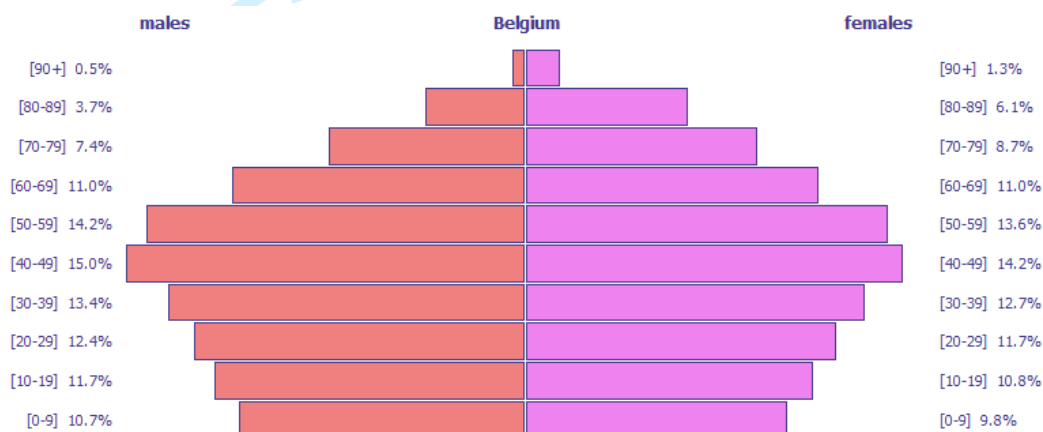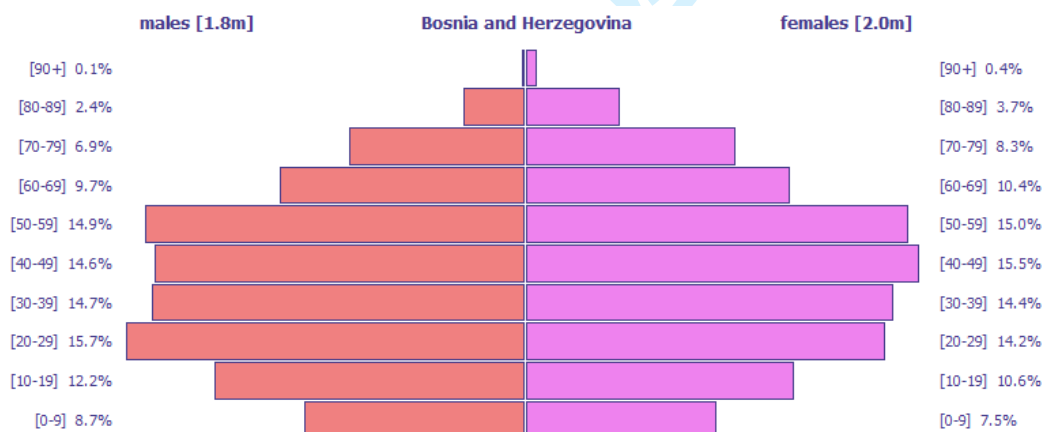

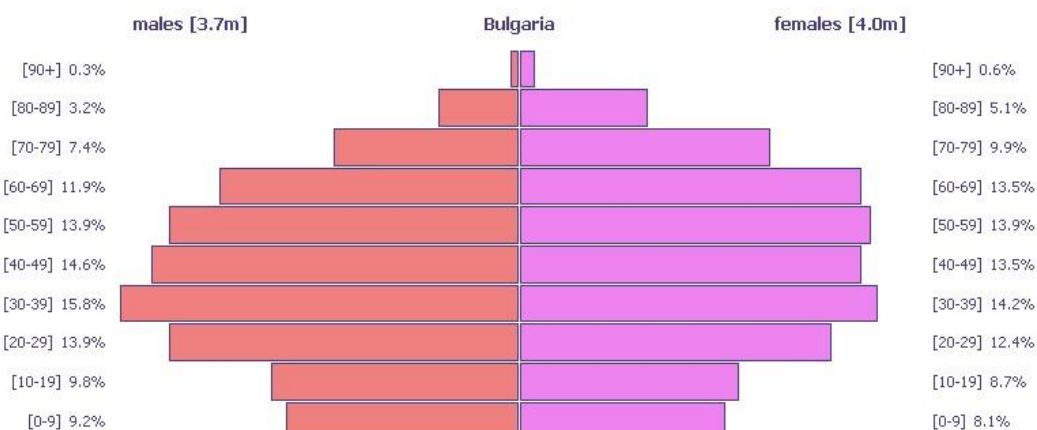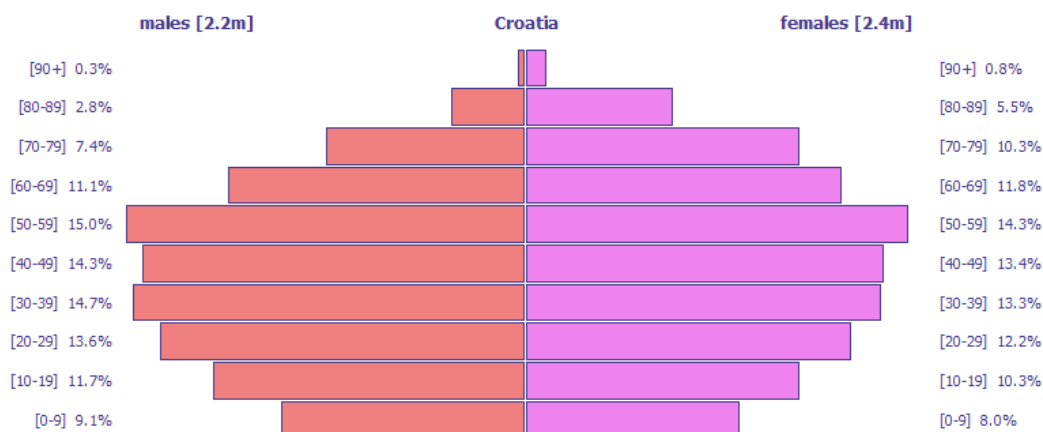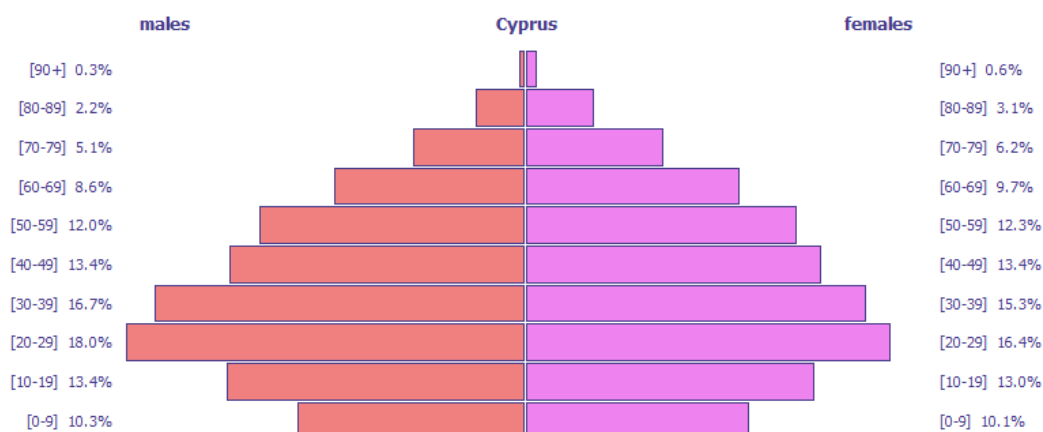

1  
2  
3  
4  
5  
6  
7  
8  
9  
10  
11  
12  
13  
14  
15  
16  
17  
18  
19  
20  
21  
22  
23  
24  
25  
26  
27  
28  
29  
30  
31  
32  
33  
34  
35  
36  
37  
38  
39  
40  
41  
42  
43  
44  
45  
46  
47  
48  
49  
50  
51  
52  
53  
54  
55  
56  
57  
58  
59  
60

1  
2  
3  
4  
5  
6  
7  
8  
9  
10  
11  
12  
13  
14  
15  
16  
17  
18  
19  
20  
21  
22  
23  
24  
25  
26  
27  
28  
29  
30  
31  
32  
33  
34  
35  
36  
37  
38  
39  
40  
41  
42  
43  
44  
45  
46  
47  
48  
49  
50  
51  
52  
53  
54  
55  
56  
57  
58  
59  
60

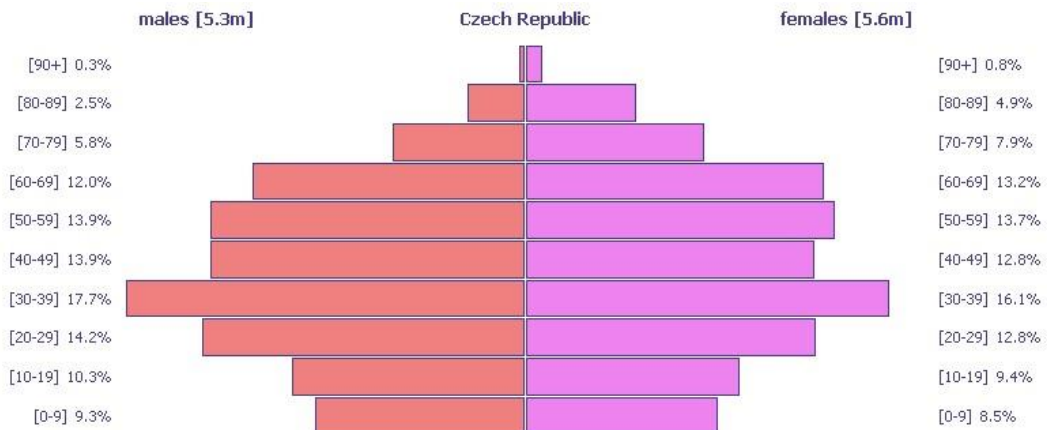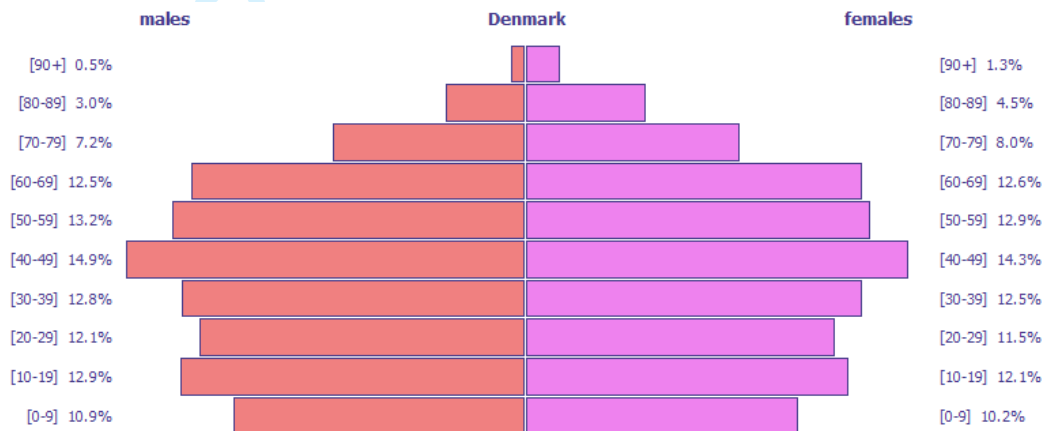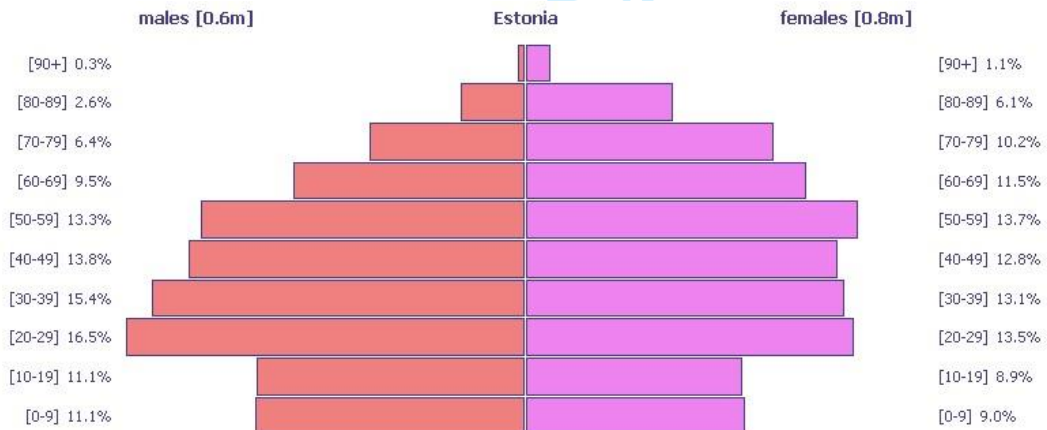



1  
2  
3  
4  
5  
6  
7  
8  
9  
10  
11  
12  
13  
14  
15  
16  
17  
18  
19  
20  
21  
22  
23  
24  
25  
26  
27  
28  
29  
30  
31  
32  
33  
34  
35  
36  
37  
38  
39  
40  
41  
42  
43  
44  
45  
46  
47  
48  
49  
50  
51  
52  
53  
54  
55  
56  
57  
58  
59  
60

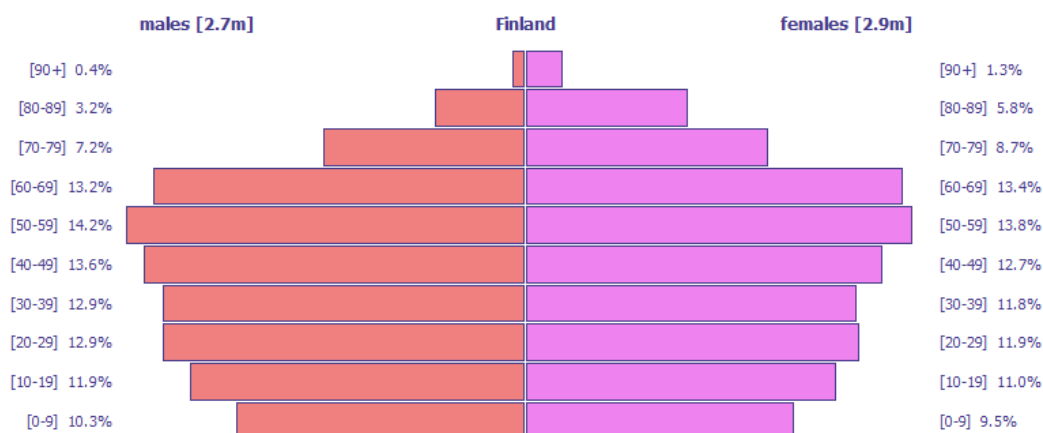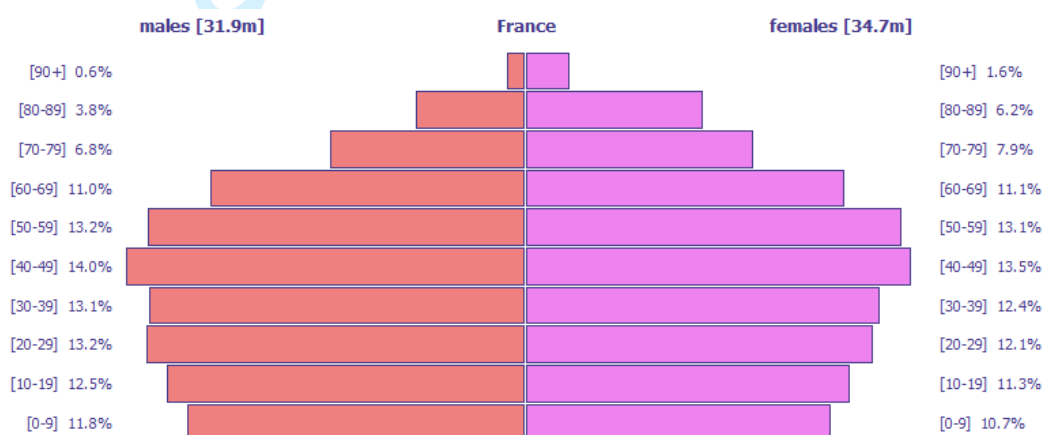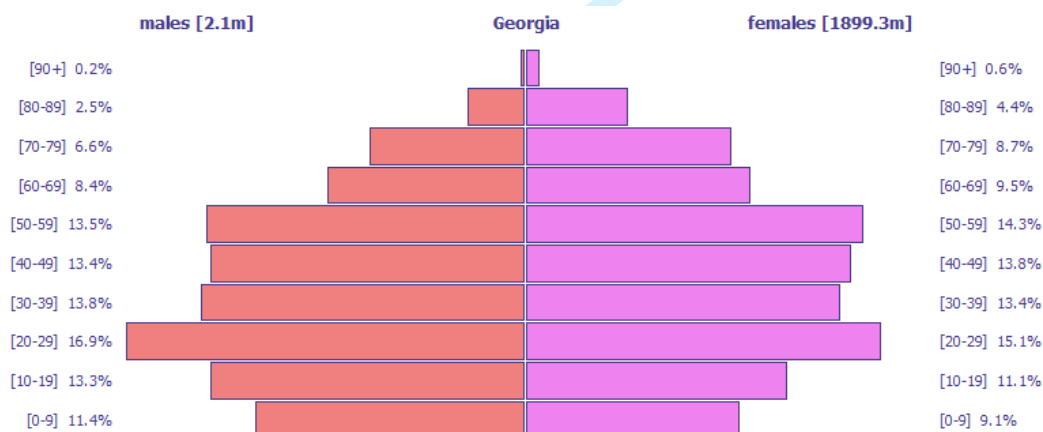

1  
2  
3  
4  
5  
6  
7  
8  
9  
10  
11  
12  
13  
14  
15  
16  
17  
18  
19  
20  
21  
22  
23  
24  
25  
26  
27  
28  
29  
30  
31  
32  
33  
34  
35  
36  
37  
38  
39  
40  
41  
42  
43  
44  
45  
46  
47  
48  
49  
50  
51  
52  
53  
54  
55  
56  
57  
58  
59  
60

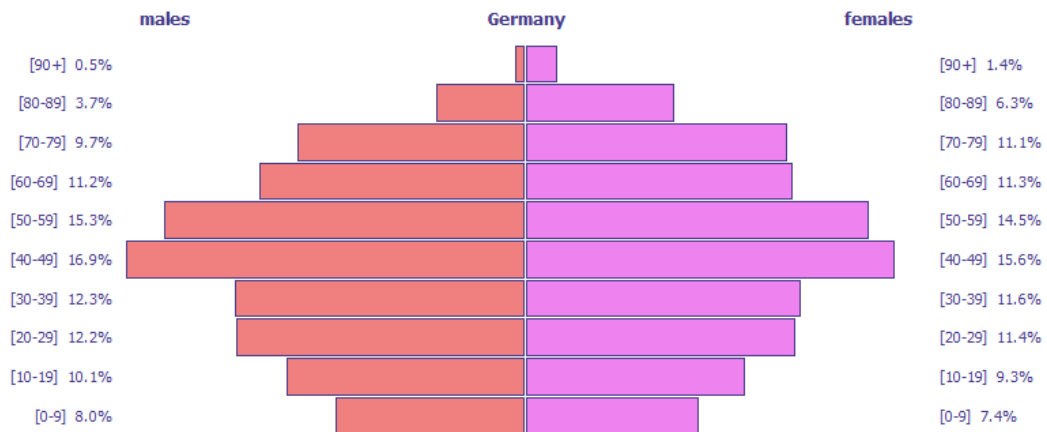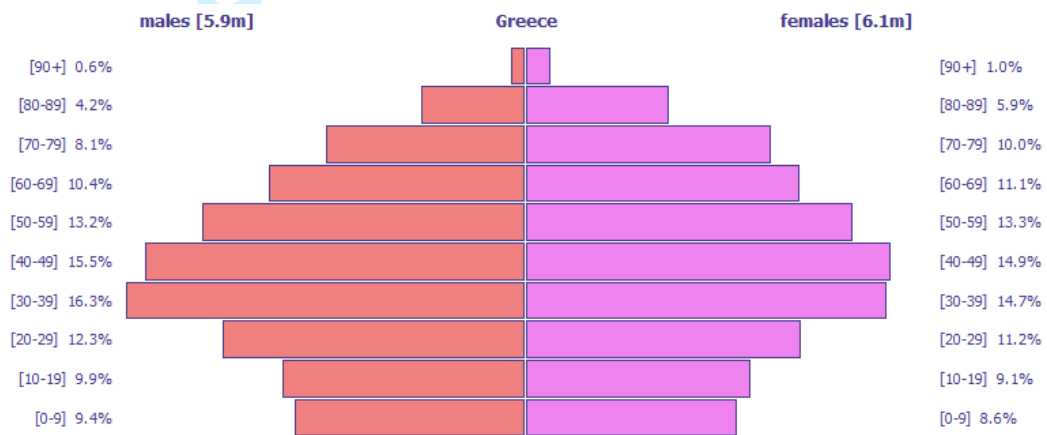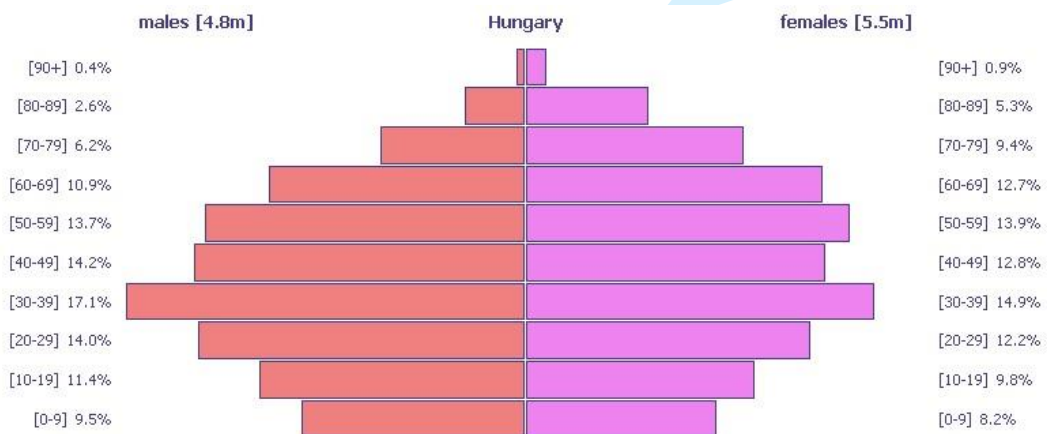

1  
2  
3  
4  
5  
6  
7  
8  
9  
10  
11  
12  
13  
14  
15  
16  
17  
18  
19  
20  
21  
22  
23  
24  
25  
26  
27  
28  
29  
30  
31  
32  
33  
34  
35  
36  
37  
38  
39  
40  
41  
42  
43  
44  
45  
46  
47  
48  
49  
50  
51  
52  
53  
54  
55  
56  
57  
58  
59  
60

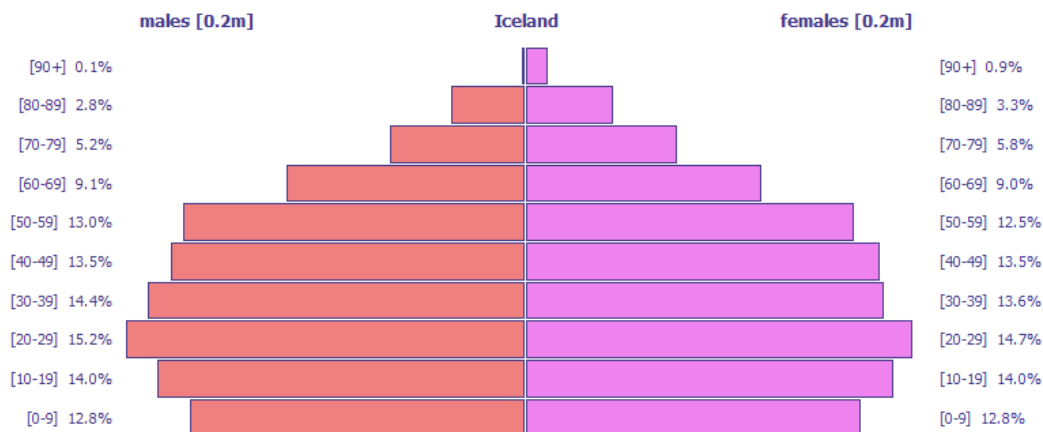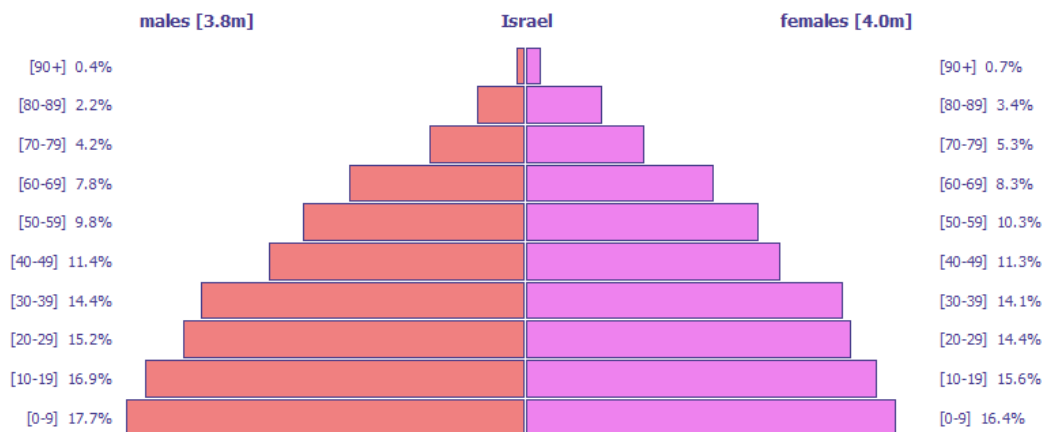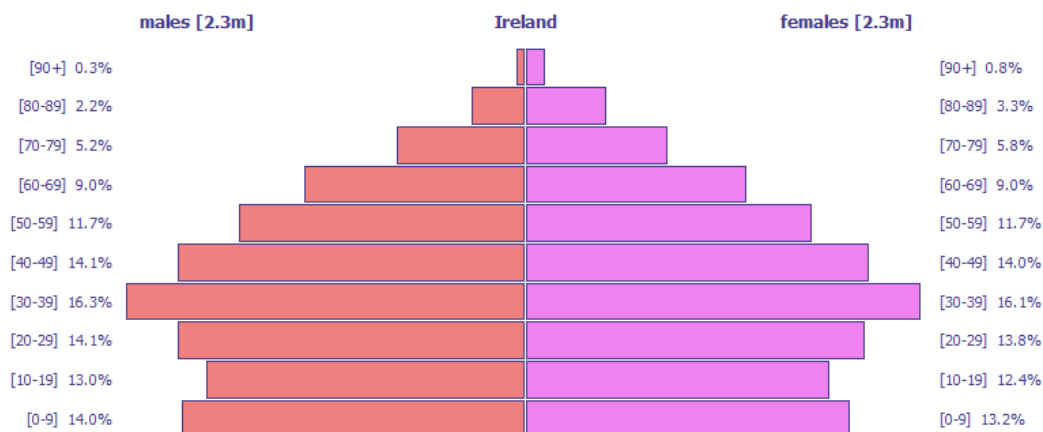

1  
2  
3  
4  
5  
6  
7  
8  
9  
10  
11  
12  
13  
14  
15  
16  
17  
18  
19  
20  
21  
22  
23  
24  
25  
26  
27  
28  
29  
30  
31  
32  
33  
34  
35  
36  
37  
38  
39  
40  
41  
42  
43  
44  
45  
46  
47  
48  
49  
50  
51  
52  
53  
54  
55  
56  
57  
58  
59  
60

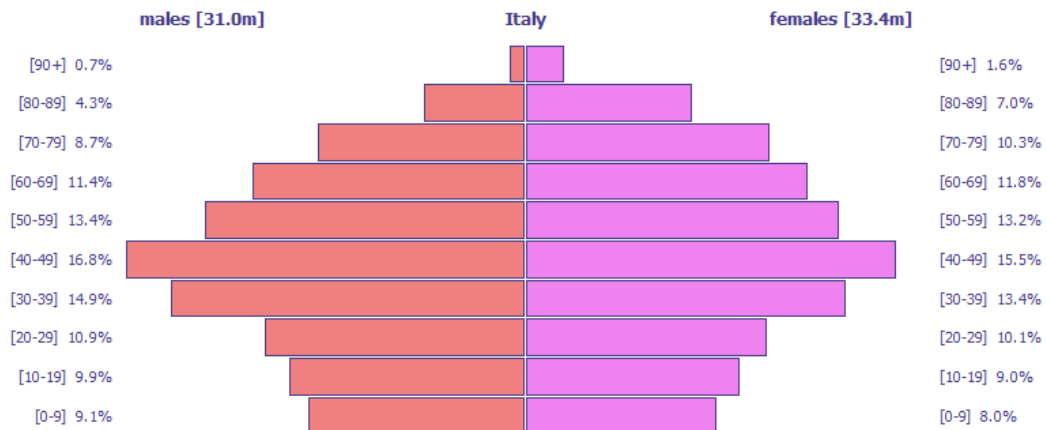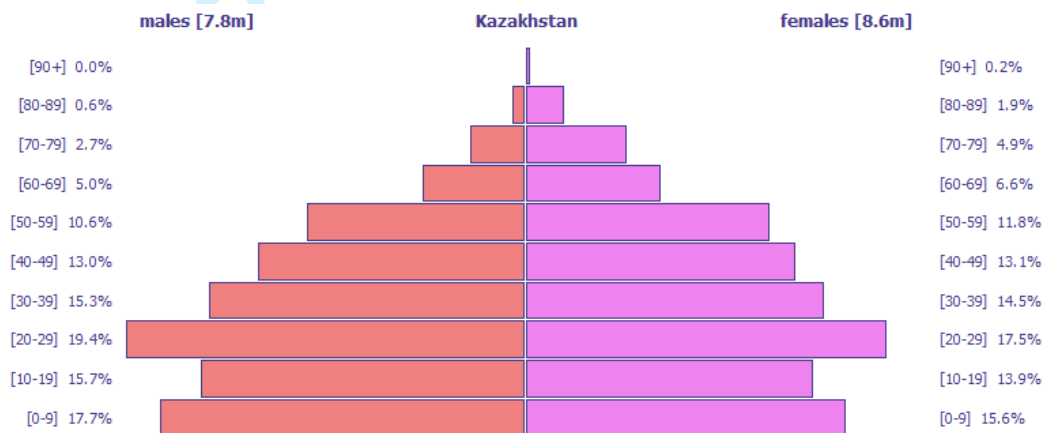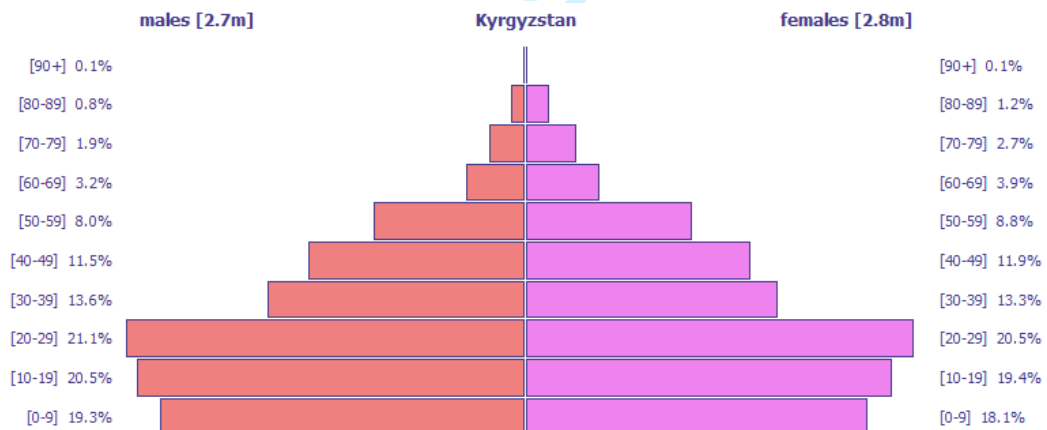

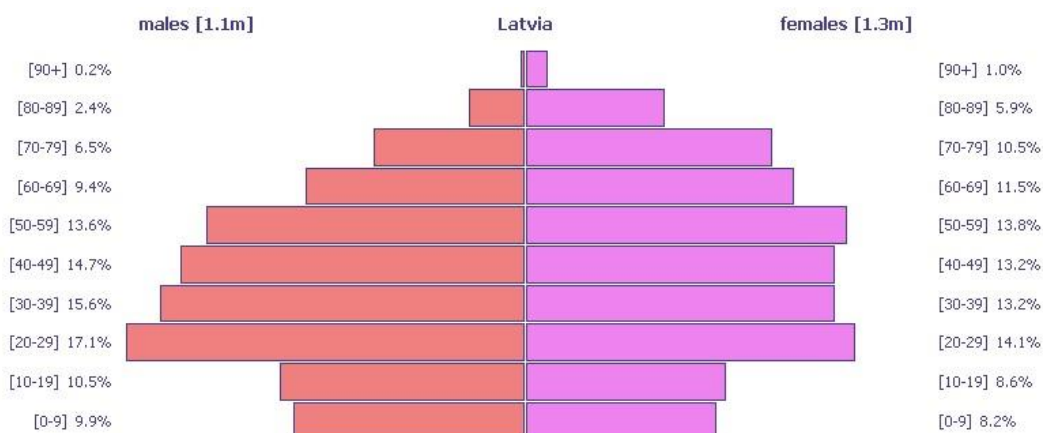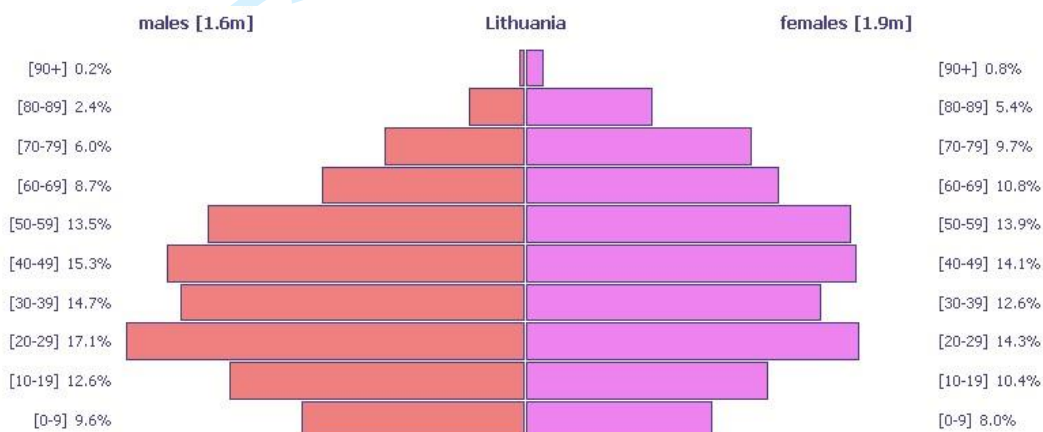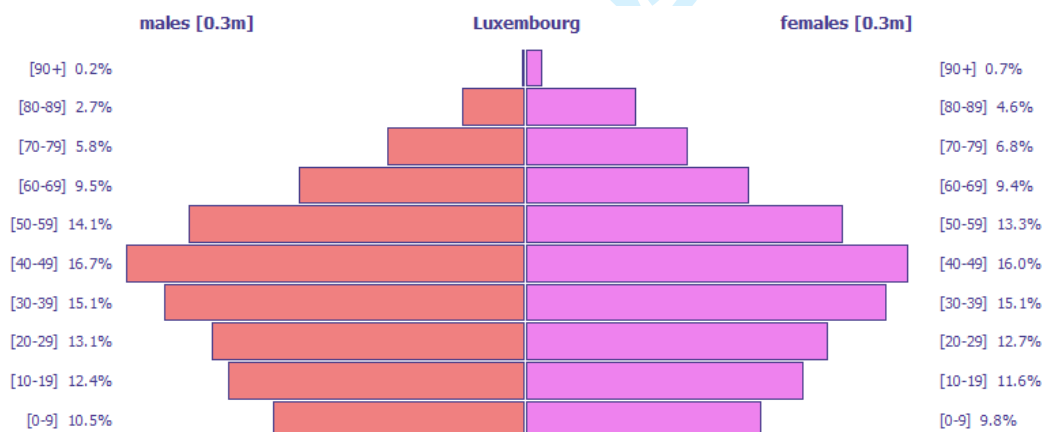

1  
2  
3  
4  
5  
6  
7  
8  
9  
10  
11  
12  
13  
14  
15  
16  
17  
18  
19  
20  
21  
22  
23  
24  
25  
26  
27  
28  
29  
30  
31  
32  
33  
34  
35  
36  
37  
38  
39  
40  
41  
42  
43  
44  
45  
46  
47  
48  
49  
50  
51  
52  
53  
54  
55  
56  
57  
58  
59  
60

1  
2  
3  
4  
5  
6  
7  
8  
9  
10  
11  
12  
13  
14  
15  
16  
17  
18  
19  
20  
21  
22  
23  
24  
25  
26  
27  
28  
29  
30  
31  
32  
33  
34  
35  
36  
37  
38  
39  
40  
41  
42  
43  
44  
45  
46  
47  
48  
49  
50  
51  
52  
53  
54  
55  
56  
57  
58  
59  
60

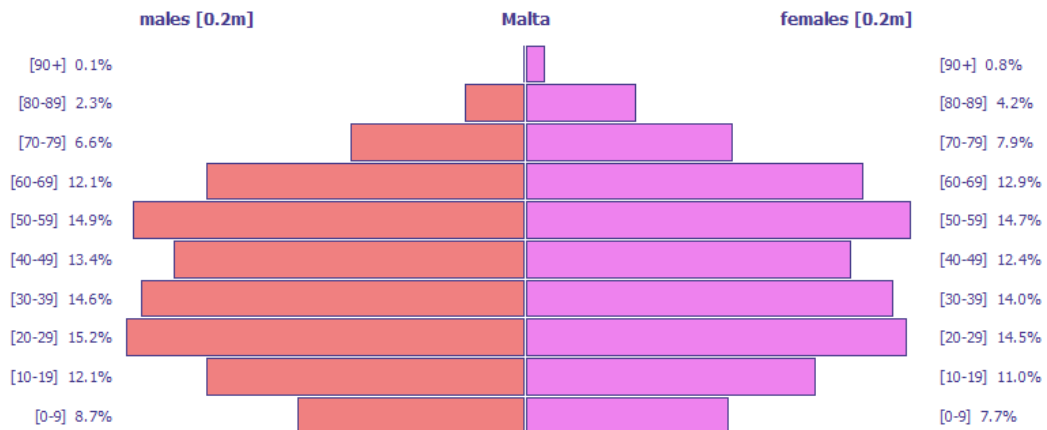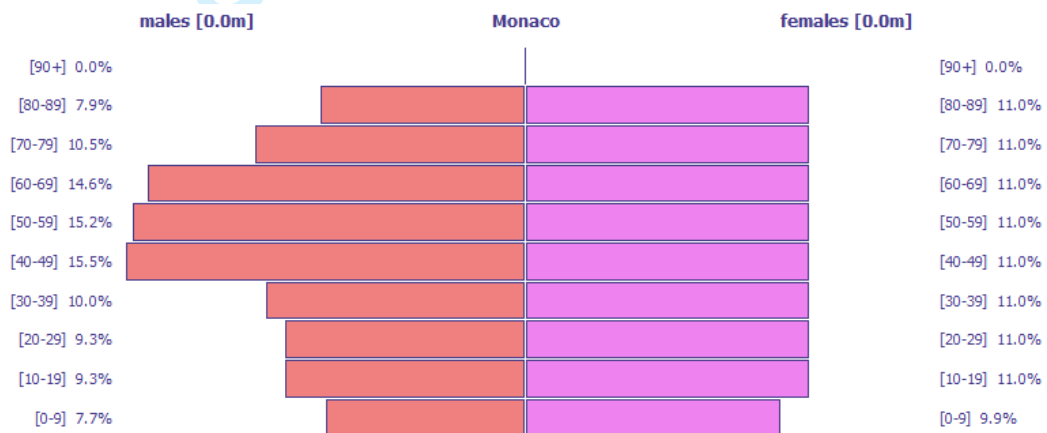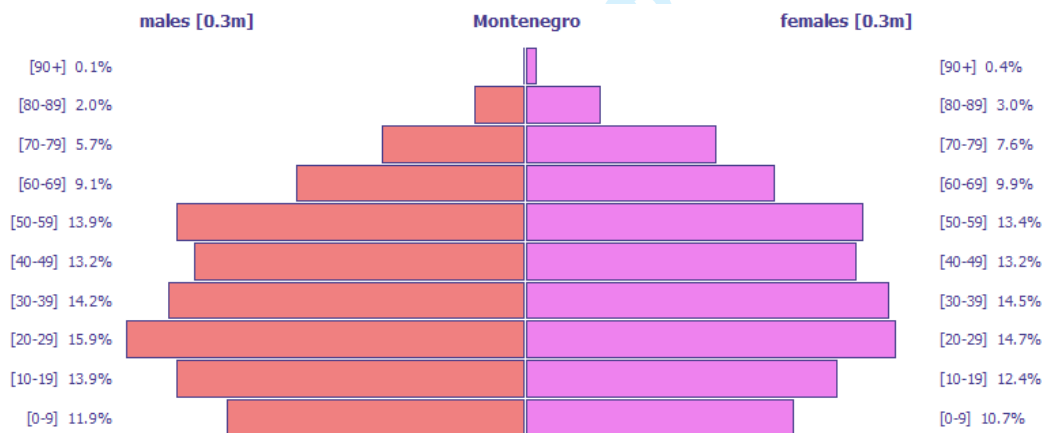

1  
2  
3  
4  
5  
6  
7  
8  
9  
10  
11  
12  
13  
14  
15  
16  
17  
18  
19  
20  
21  
22  
23  
24  
25  
26  
27  
28  
29  
30  
31  
32  
33  
34  
35  
36  
37  
38  
39  
40  
41  
42  
43  
44  
45  
46  
47  
48  
49  
50  
51  
52  
53  
54  
55  
56  
57  
58  
59  
60

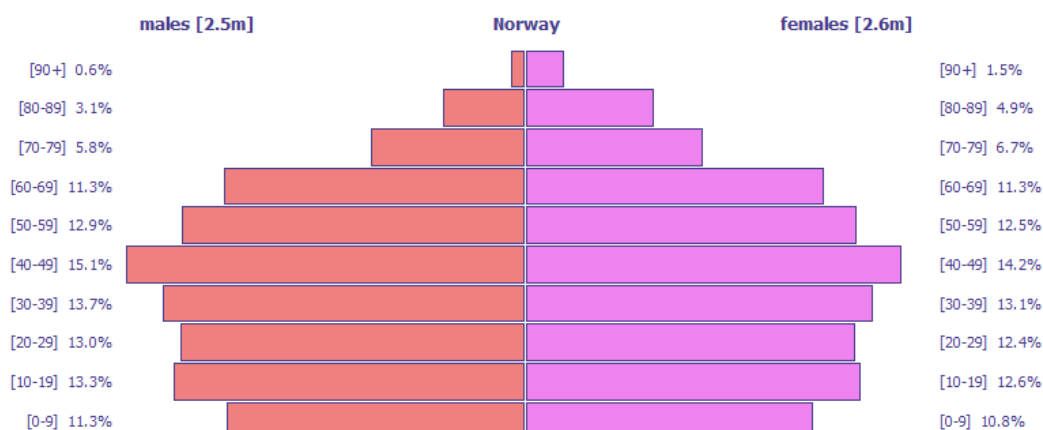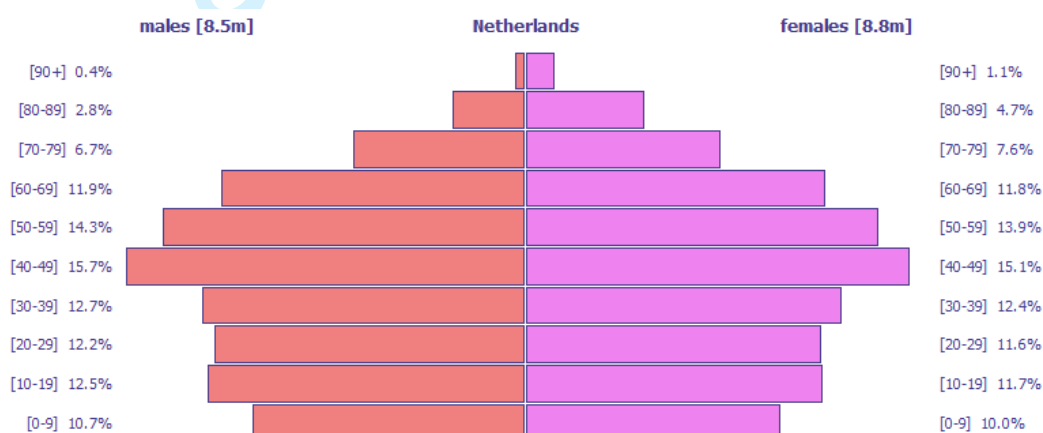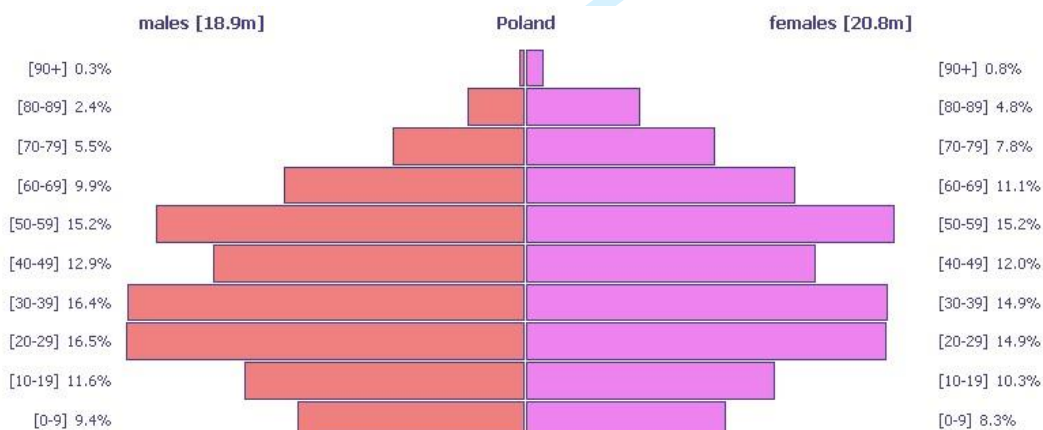

1  
2  
3  
4  
5  
6  
7  
8  
9  
10  
11  
12  
13  
14  
15  
16  
17  
18  
19  
20  
21  
22  
23  
24  
25  
26  
27  
28  
29  
30  
31  
32  
33  
34  
35  
36  
37  
38  
39  
40  
41  
42  
43  
44  
45  
46  
47  
48  
49  
50  
51  
52  
53  
54  
55  
56  
57  
58  
59  
60

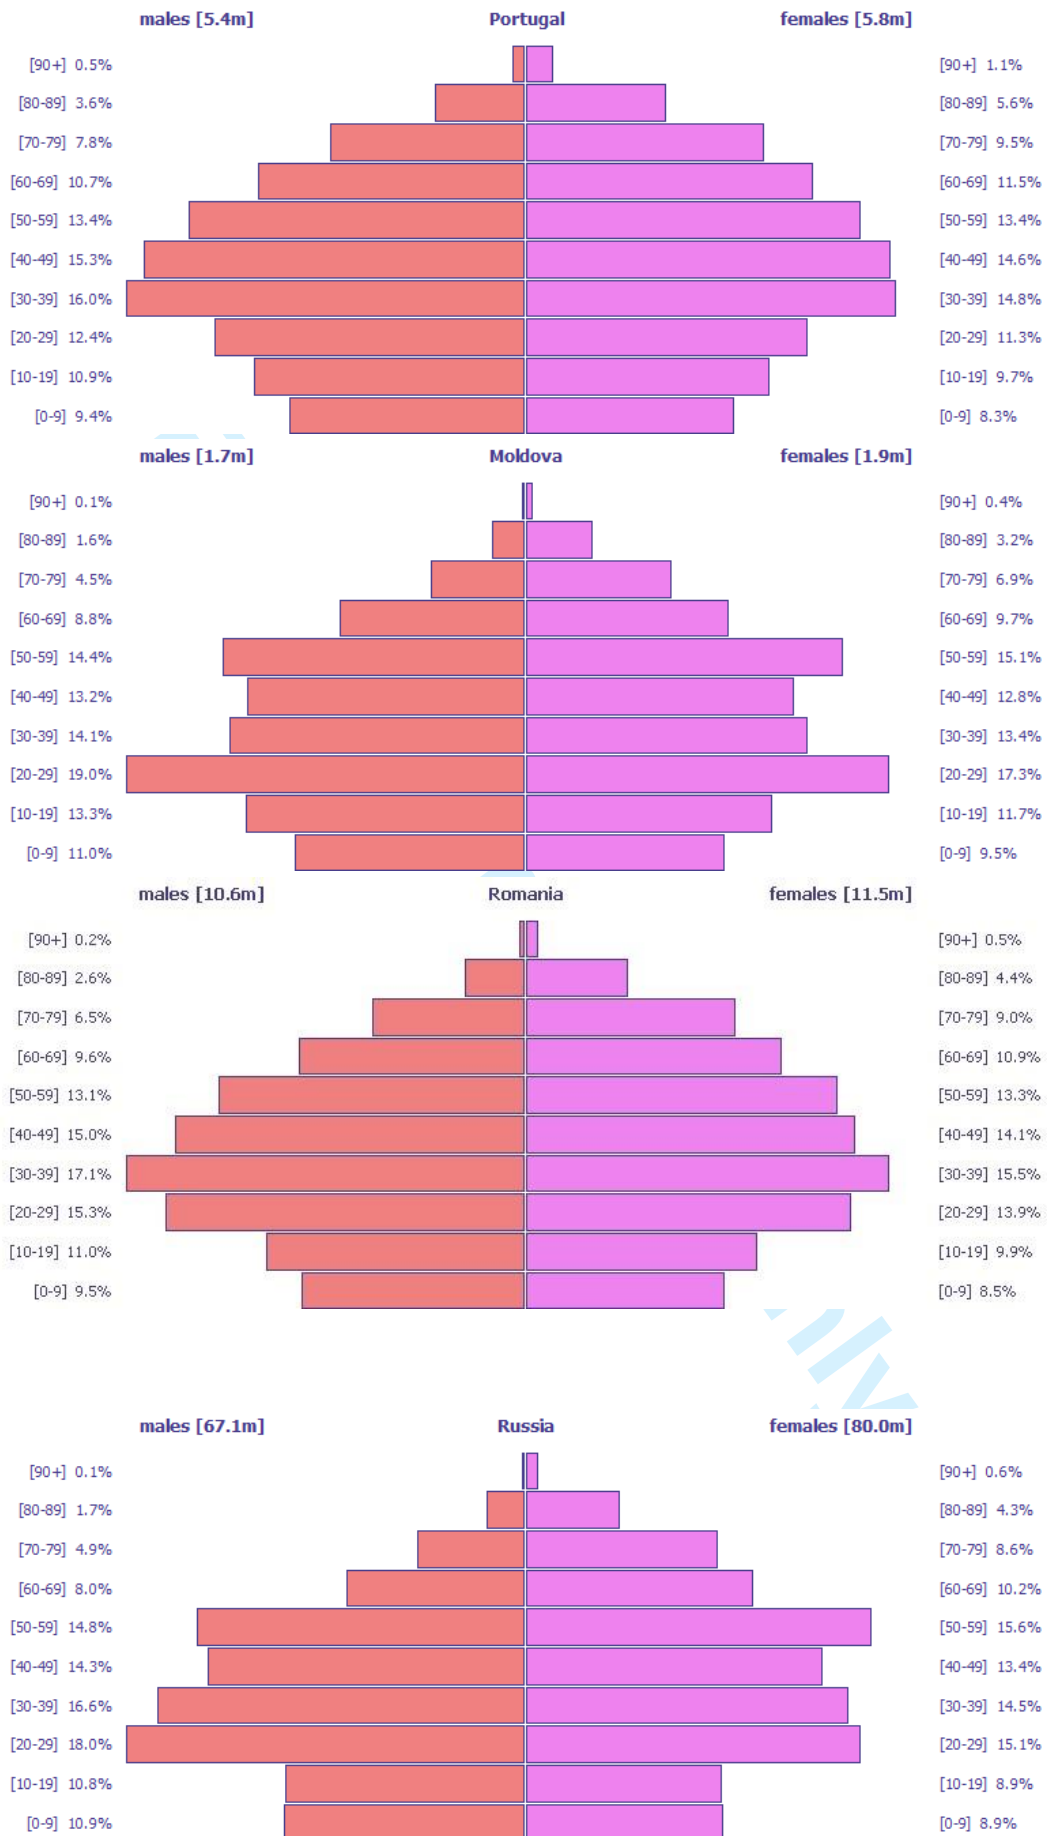



1  
2  
3  
4  
5  
6  
7  
8  
9  
10  
11  
12  
13  
14  
15  
16  
17  
18  
19  
20  
21  
22  
23  
24  
25  
26  
27  
28  
29  
30  
31  
32  
33  
34  
35  
36  
37  
38  
39  
40  
41  
42  
43  
44  
45  
46  
47  
48  
49  
50  
51  
52  
53  
54  
55  
56  
57  
58  
59  
60

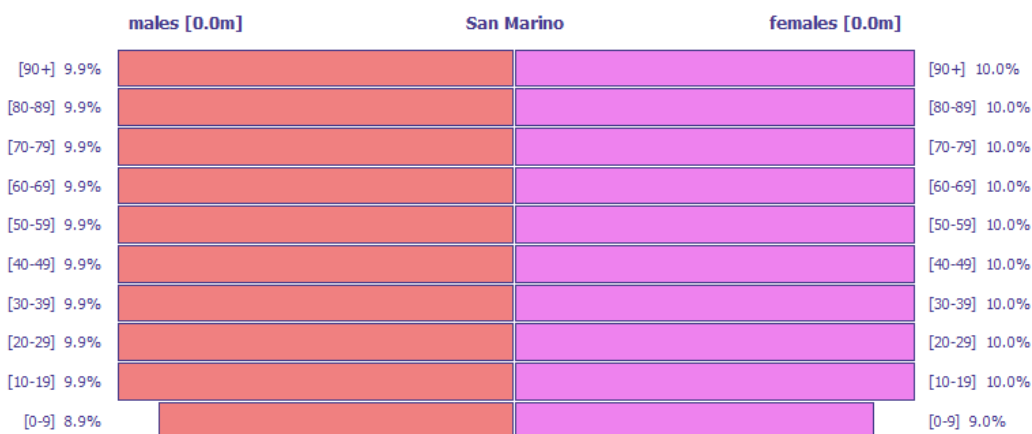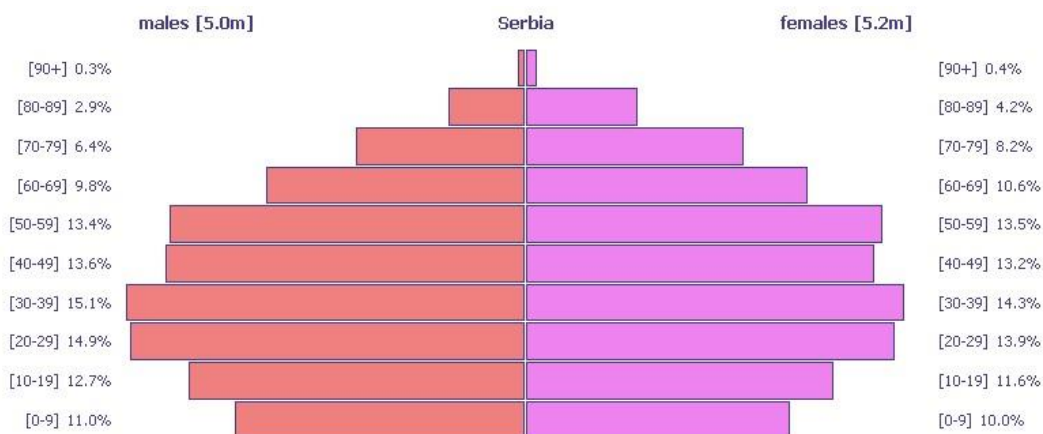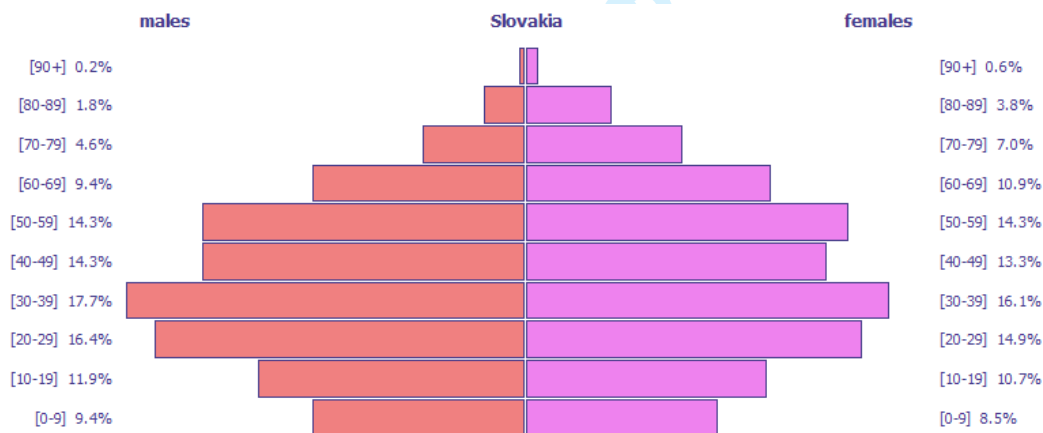

1  
2  
3  
4  
5  
6  
7  
8  
9  
10  
11  
12  
13  
14  
15  
16  
17  
18  
19  
20  
21  
22  
23  
24  
25  
26  
27  
28  
29  
30  
31  
32  
33  
34  
35  
36  
37  
38  
39  
40  
41  
42  
43  
44  
45  
46  
47  
48  
49  
50  
51  
52  
53  
54  
55  
56  
57  
58  
59  
60

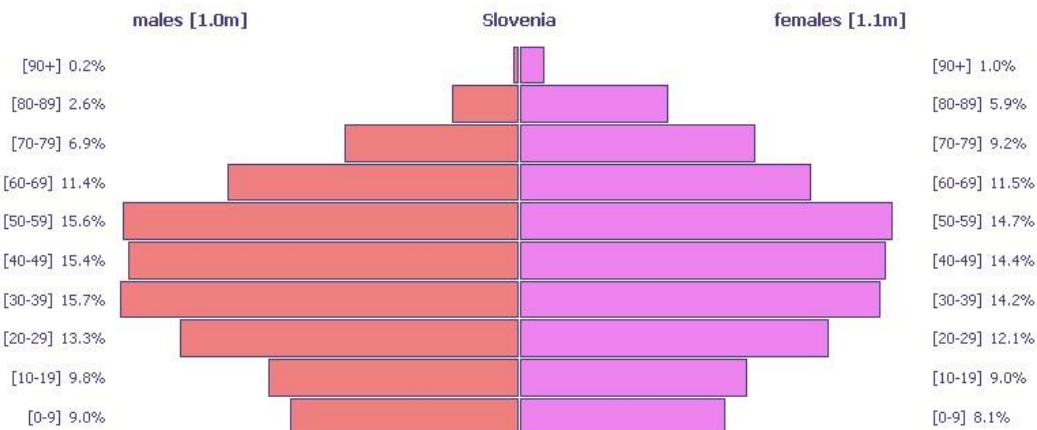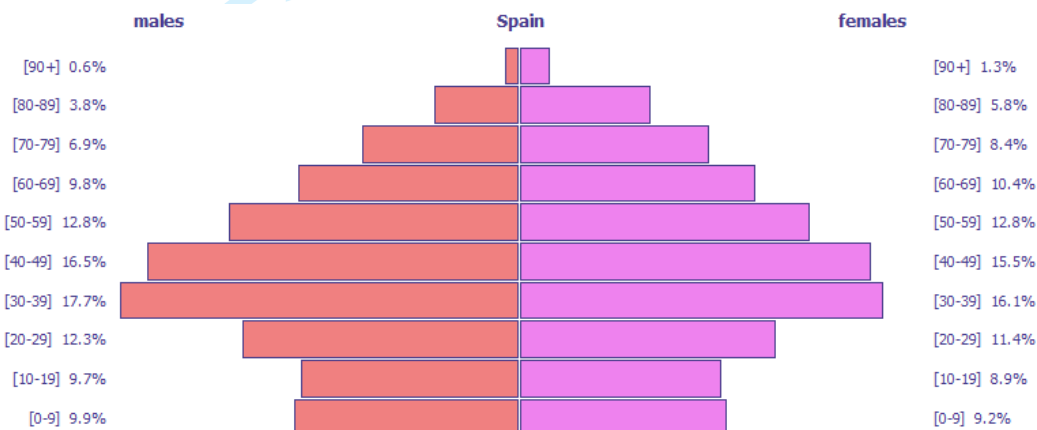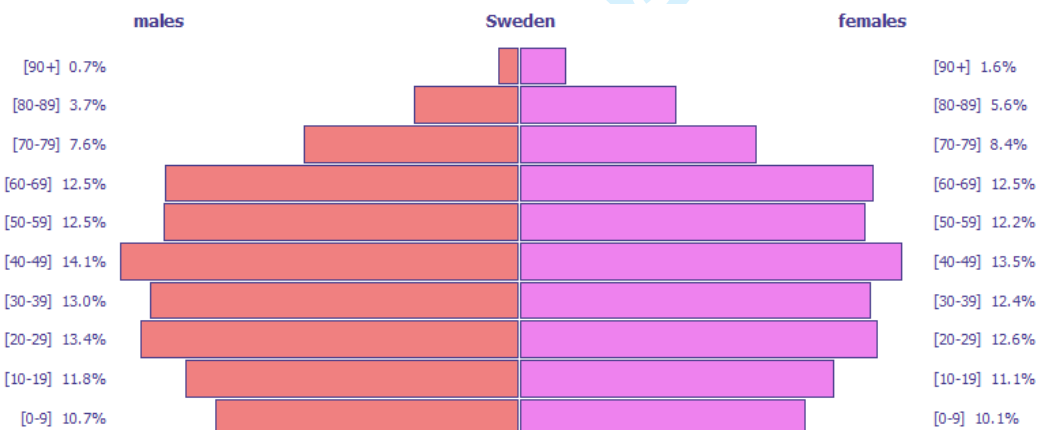

1  
2  
3  
4  
5  
6  
7  
8  
9  
10  
11  
12  
13  
14  
15  
16  
17  
18  
19  
20  
21  
22  
23  
24  
25  
26  
27  
28  
29  
30  
31  
32  
33  
34  
35  
36  
37  
38  
39  
40  
41  
42  
43  
44  
45  
46  
47  
48  
49  
50  
51  
52  
53  
54  
55  
56  
57  
58  
59  
60

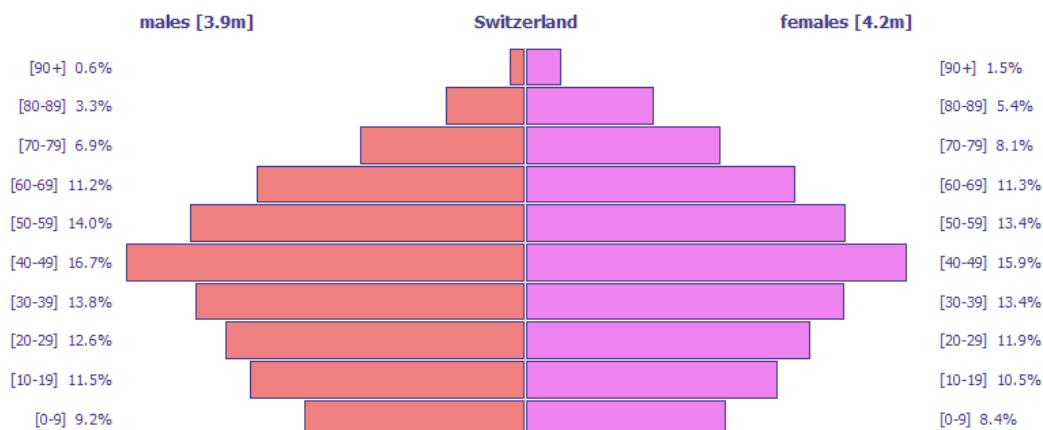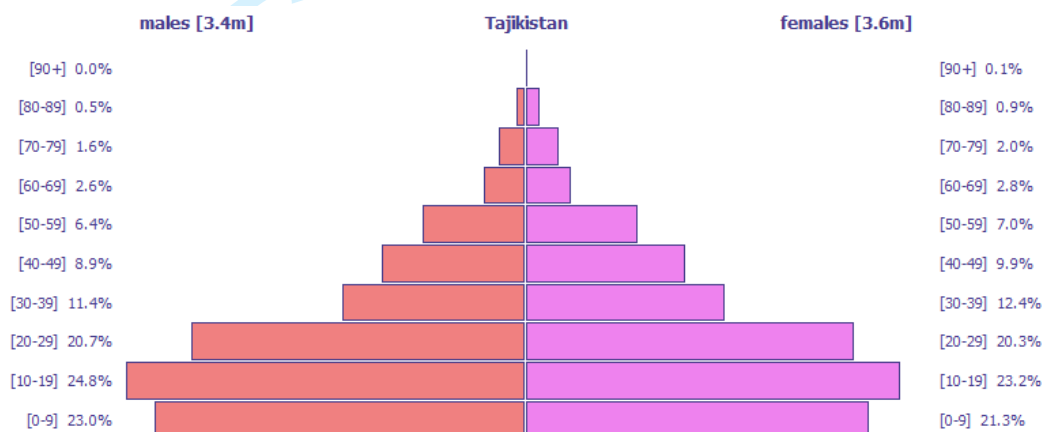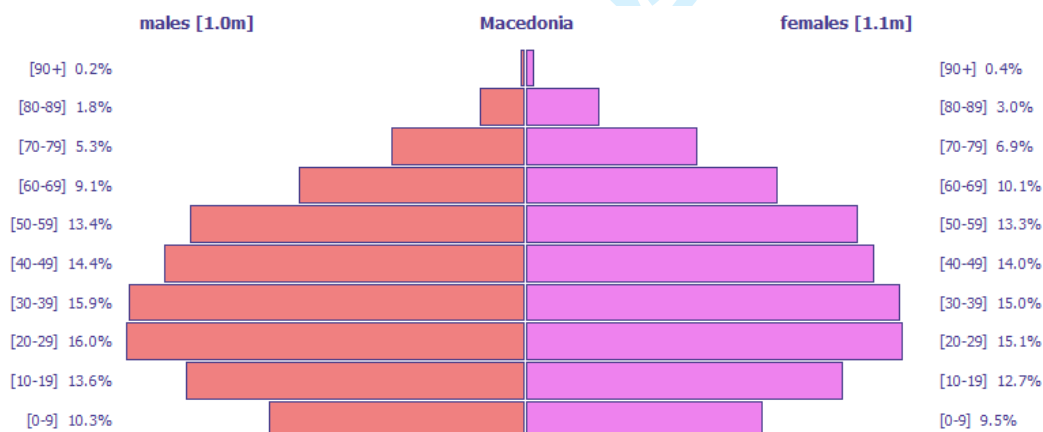

1  
2  
3  
4  
5  
6  
7  
8  
9  
10  
11  
12  
13  
14  
15  
16  
17  
18  
19  
20  
21  
22  
23  
24  
25  
26  
27  
28  
29  
30  
31  
32  
33  
34  
35  
36  
37  
38  
39  
40  
41  
42  
43  
44  
45  
46  
47  
48  
49  
50  
51  
52  
53  
54  
55  
56  
57  
58  
59  
60

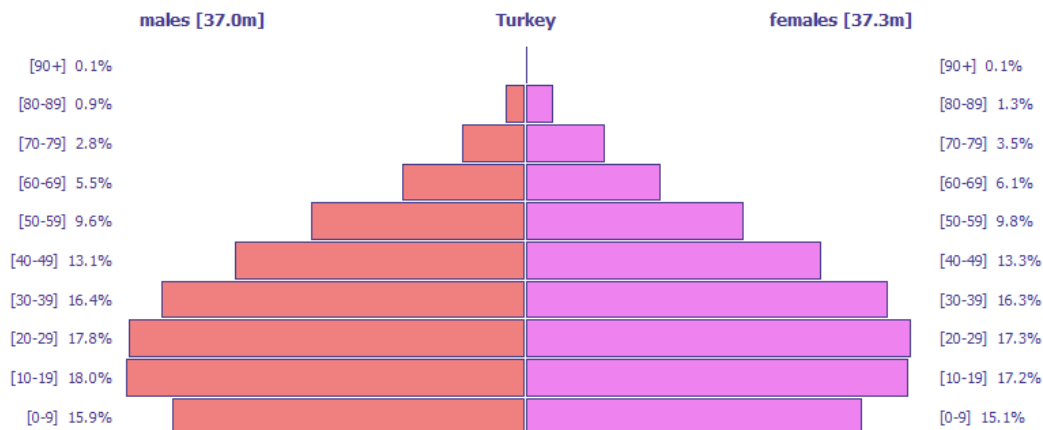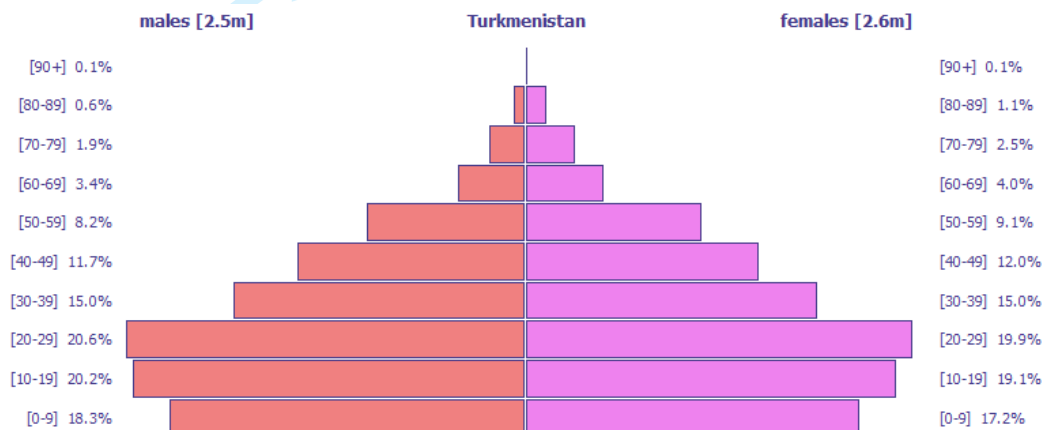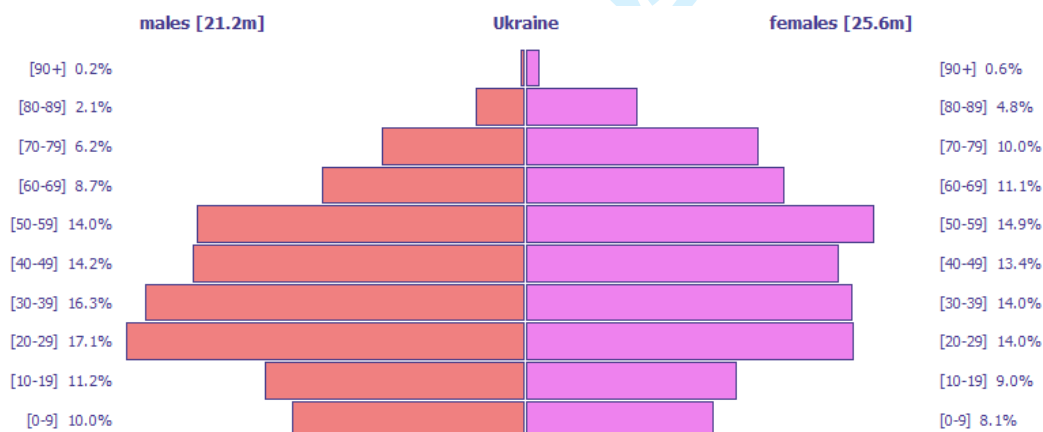

1  
2  
3  
4  
5  
6  
7  
8  
9  
10  
11  
12  
13  
14  
15  
16  
17  
18  
19  
20  
21  
22  
23  
24  
25  
26  
27  
28  
29  
30  
31  
32  
33  
34  
35  
36  
37  
38  
39  
40  
41  
42  
43  
44  
45  
46  
47  
48  
49  
50  
51  
52  
53  
54  
55  
56  
57  
58  
59  
60

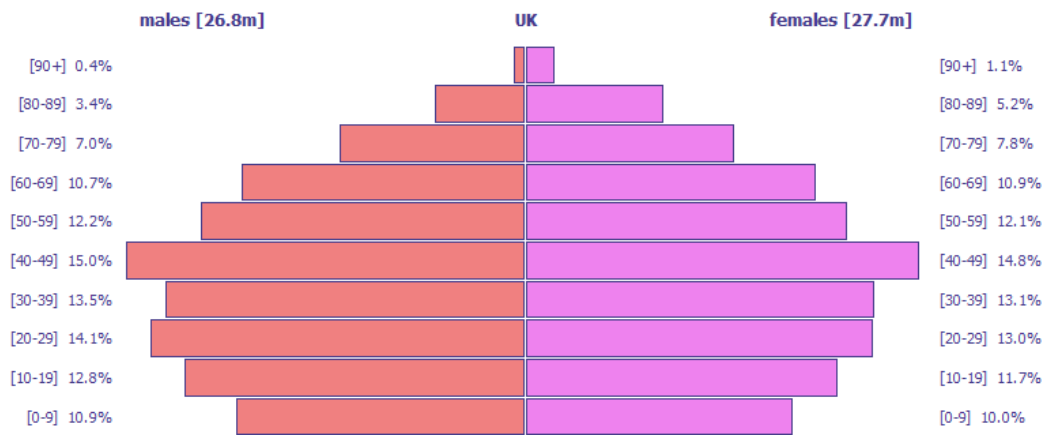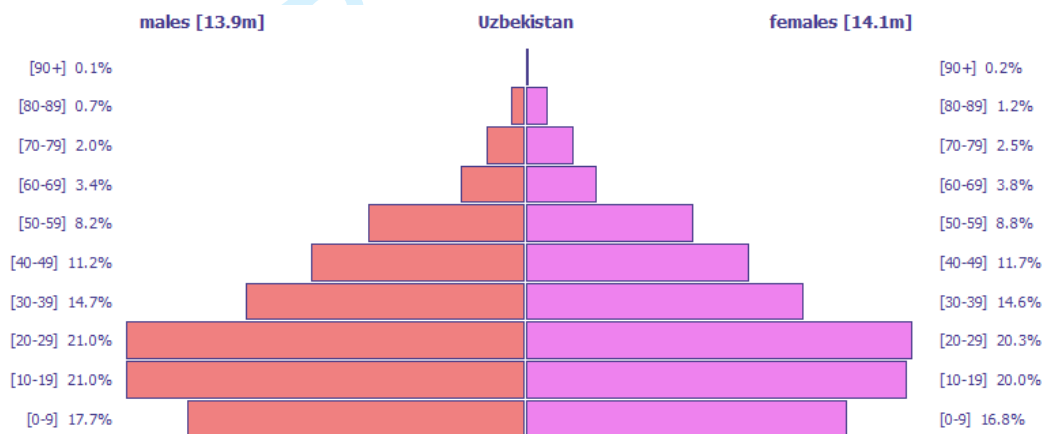

## Appendix 6. Disease tables by country

### Albania

**Table A1. Cumulative incidence cases from year 2010 [per 100000 of population in 2010] for Albania**

| Year       | Cancers    | CHD & Stroke | Osteoarthritis | Diabetes   | Hypertension |
|------------|------------|--------------|----------------|------------|--------------|
| Scenario 0 |            |              |                |            |              |
| 2010       | 113 [±3]   | 524 [±6]     | 13 [±1]        | 113 [±3]   | 1555 [±11]   |
| 2020       | 1178 [±9]  | 5401 [±20]   | 133 [±3]       | 988 [±9]   | 16435 [±35]  |
| 2030       | 2222 [±13] | 10237 [±27]  | 243 [±4]       | 1588 [±11] | 30095 [±47]  |
| Scenario 1 |            |              |                |            |              |
| 2010       | 113 [±3]   | 525 [±6]     | 13 [±1]        | 113 [±3]   | 1555 [±11]   |
| 2020       | 1169 [±9]  | 5379 [±20]   | 135 [±3]       | 960 [±9]   | 16392 [±35]  |
| 2030       | 2208 [±13] | 10193 [±27]  | 244 [±4]       | 1552 [±11] | 30012 [±47]  |
| Scenario 2 |            |              |                |            |              |
| 2010       | 110 [±3]   | 525 [±6]     | 14 [±1]        | 114 [±3]   | 1557 [±11]   |
| 2020       | 1146 [±9]  | 5235 [±20]   | 123 [±3]       | 828 [±8]   | 16136 [±35]  |
| 2030       | 2165 [±13] | 9934 [±27]   | 228 [±4]       | 1343 [±10] | 29680 [±47]  |

**Table A2. Cumulative incidence cases avoided from year 2010 [per 100000 of population in 2010] for Albania**

| Year       | Cancers  | CHD & Stroke | Osteoarthritis | Diabetes  | Hypertension |
|------------|----------|--------------|----------------|-----------|--------------|
| Scenario 1 |          |              |                |           |              |
| 2010       | 0 [±4]   | -1 [±9]      | 0 [±1]         | 0 [±4]    | 0 [±16]      |
| 2020       | 9 [±14]  | 22 [±29]     | -2 [±5]        | 28 [±12]  | 43 [±51]     |
| 2030       | 14 [±19] | 44 [±40]     | -1 [±6]        | 36 [±16]  | 83 [±69]     |
| Scenario 2 |          |              |                |           |              |
| 2010       | 3 [±4]   | -1 [±9]      | -1 [±1]        | -1 [±4]   | -2 [±16]     |
| 2020       | 32 [±14] | 166 [±29]    | 10 [±5]        | 160 [±12] | 299 [±51]    |
| 2030       | 57 [±19] | 303 [±40]    | 15 [±6]        | 245 [±15] | 415 [±69]    |

**Table A3. Prevalence cases in year [per 100000] for Albania**

| Year       | Cancers   | CHD & Stroke | Osteoarthritis | Diabetes   | Hypertension |
|------------|-----------|--------------|----------------|------------|--------------|
| Scenario 0 |           |              |                |            |              |
| 2010       | 829 [±8]  | 1954 [±13]   | 262 [±5]       | 2724 [±15] | 42669 [±58]  |
| 2020       | 965 [±9]  | 2419 [±14]   | 274 [±5]       | 2718 [±14] | 47159 [±60]  |
| 2030       | 1015 [±9] | 2663 [±14]   | 287 [±5]       | 2509 [±14] | 50524 [±61]  |
| Scenario 1 |           |              |                |            |              |
| 2010       | 840 [±8]  | 1953 [±12]   | 261 [±5]       | 2727 [±15] | 42639 [±58]  |
| 2020       | 960 [±9]  | 2410 [±14]   | 276 [±5]       | 2693 [±14] | 47089 [±60]  |
| 2030       | 1011 [±9] | 2651 [±14]   | 287 [±5]       | 2481 [±13] | 50428 [±61]  |
| Scenario 2 |           |              |                |            |              |
| 2010       | 833 [±8]  | 1960 [±13]   | 263 [±5]       | 2723 [±15] | 42661 [±58]  |
| 2020       | 944 [±8]  | 2357 [±13]   | 266 [±4]       | 2575 [±14] | 46904 [±60]  |
| 2030       | 997 [±9]  | 2586 [±14]   | 277 [±4]       | 2320 [±13] | 50222 [±61]  |

**Table A4. Prevalence cases avoided in year [per 100000] for Albania**

| Year       | Cancers   | CHD & Stroke | Osteoarthritis | Diabetes  | Hypertension |
|------------|-----------|--------------|----------------|-----------|--------------|
| Scenario 1 |           |              |                |           |              |
| 2010       | -11 [±12] | 1 [±18]      | 1 [±6]         | -3 [±21]  | 30 [±83]     |
| 2020       | 5 [±12]   | 9 [±20]      | -2 [±7]        | 25 [±21]  | 70 [±87]     |
| 2030       | 4 [±13]   | 12 [±21]     | 0 [±7]         | 28 [±20]  | 96 [±90]     |
| Scenario 2 |           |              |                |           |              |
| 2010       | -4 [±12]  | -6 [±18]     | -1 [±6]        | 1 [±21]   | 8 [±83]      |
| 2020       | 21 [±12]  | 62 [±20]     | 8 [±7]         | 143 [±21] | 255 [±87]    |
| 2030       | 18 [±13]  | 77 [±20]     | 10 [±7]        | 189 [±20] | 302 [±90]    |

## Andorra

**Table A5. Cumulative incidence cases from year 2010 [per 100000 of population in 2010] for Andorra**

| Year       | Cancers    | CHD & Stroke | Osteoarthritis | Diabetes   | Hypertension |
|------------|------------|--------------|----------------|------------|--------------|
| Scenario 0 |            |              |                |            |              |
| 2010       | 174 [±4]   | 897 [±8]     | 15 [±1]        | 218 [±4]   | 575 [±7]     |
| 2020       | 2068 [±13] | 7668 [±25]   | 184 [±4]       | 2573 [±15] | 7148 [±25]   |
| 2030       | 4426 [±20] | 15278 [±37]  | 384 [±6]       | 5328 [±22] | 14869 [±36]  |
| Scenario 1 |            |              |                |            |              |
| 2010       | 169 [±4]   | 897 [±8]     | 14 [±1]        | 218 [±4]   | 581 [±7]     |
| 2020       | 2043 [±13] | 7551 [±25]   | 179 [±4]       | 2435 [±14] | 6994 [±24]   |
| 2030       | 4358 [±20] | 14994 [±37]  | 372 [±6]       | 5022 [±21] | 14493 [±36]  |
| Scenario 2 |            |              |                |            |              |
| 2010       | 169 [±4]   | 896 [±8]     | 16 [±1]        | 216 [±4]   | 580 [±7]     |
| 2020       | 1970 [±13] | 7178 [±25]   | 168 [±4]       | 2003 [±13] | 6464 [±23]   |
| 2030       | 4188 [±19] | 14180 [±35]  | 349 [±6]       | 4138 [±19] | 13324 [±34]  |

**Table A6. Cumulative incidence cases avoided from year 2010 [per 100000 of population in 2010] for Andorra**

| Year       | Cancers   | CHD & Stroke | Osteoarthritis | Diabetes   | Hypertension |
|------------|-----------|--------------|----------------|------------|--------------|
| Scenario 1 |           |              |                |            |              |
| 2010       | 5 [±5]    | 0 [±12]      | 1 [±2]         | 0 [±6]     | -6 [±10]     |
| 2020       | 25 [±18]  | 117 [±35]    | 5 [±5]         | 138 [±20]  | 154 [±34]    |
| 2030       | 68 [±27]  | 284 [±49]    | 12 [±8]        | 306 [±29]  | 376 [±48]    |
| Scenario 2 |           |              |                |            |              |
| 2010       | 5 [±5]    | 1 [±12]      | -1 [±2]        | 2 [±6]     | -5 [±10]     |
| 2020       | 98 [±18]  | 490 [±34]    | 16 [±5]        | 570 [±19]  | 684 [±33]    |
| 2030       | 238 [±26] | 1098 [±49]   | 35 [±8]        | 1190 [±28] | 1545 [±47]   |



**Table A7. Prevalence cases in year [per 100000] for Andorra**

| Year       | Cancers    | CHD & Stroke | Osteoarthritis | Diabetes   | Hypertension |
|------------|------------|--------------|----------------|------------|--------------|
| Scenario 0 |            |              |                |            |              |
| 2010       | 1587 [±11] | 2299 [±14]   | 403 [±6]       | 4303 [±19] | 13720 [±33]  |
| 2020       | 1888 [±13] | 2441 [±14]   | 396 [±6]       | 4183 [±19] | 14817 [±35]  |
| 2030       | 2278 [±14] | 3145 [±17]   | 473 [±6]       | 4857 [±21] | 17775 [±40]  |
| Scenario 1 |            |              |                |            |              |
| 2010       | 1589 [±11] | 2300 [±14]   | 402 [±6]       | 4311 [±19] | 13724 [±33]  |
| 2020       | 1876 [±13] | 2420 [±14]   | 390 [±6]       | 4088 [±19] | 14683 [±35]  |
| 2030       | 2248 [±14] | 3085 [±17]   | 463 [±6]       | 4666 [±20] | 17498 [±39]  |
| Scenario 2 |            |              |                |            |              |
| 2010       | 1579 [±11] | 2300 [±14]   | 405 [±6]       | 4304 [±19] | 13720 [±33]  |
| 2020       | 1837 [±12] | 2316 [±14]   | 384 [±6]       | 3763 [±18] | 14282 [±35]  |
| 2030       | 2198 [±14] | 2939 [±16]   | 450 [±6]       | 4111 [±19] | 16696 [±38]  |

**Table A8. Prevalence cases avoided in year [per 100000] for Andorra**

| Year       | Cancers  | CHD & Stroke | Osteoarthritis | Diabetes  | Hypertension |
|------------|----------|--------------|----------------|-----------|--------------|
| Scenario 1 |          |              |                |           |              |
| 2010       | -2 [±16] | -1 [±19]     | 1 [±8]         | -8 [±26]  | -4 [±47]     |
| 2020       | 12 [±17] | 21 [±20]     | 6 [±8]         | 95 [±26]  | 134 [±49]    |
| 2030       | 30 [±19] | 60 [±22]     | 10 [±9]        | 191 [±28] | 277 [±53]    |
| Scenario 2 |          |              |                |           |              |
| 2010       | 8 [±16]  | -1 [±19]     | -2 [±8]        | -1 [±26]  | 0 [±47]      |
| 2020       | 51 [±17] | 125 [±20]    | 12 [±8]        | 420 [±25] | 535 [±48]    |
| 2030       | 80 [±19] | 206 [±22]    | 23 [±9]        | 746 [±27] | 1079 [±53]   |

## Austria

**Table A9. Cumulative incidence cases from year 2010 [per 100000 of population in 2010] for Austria**

| Year       | Cancers    | CHD & Stroke | Osteoarthritis | Diabetes   | Hypertension |
|------------|------------|--------------|----------------|------------|--------------|
| Scenario 0 |            |              |                |            |              |
| 2010       | 183 [±4]   | 3033 [±16]   | 17 [±1]        | 224 [±4]   | 504 [±6]     |
| 2020       | 2086 [±14] | 24761 [±47]  | 206 [±4]       | 2678 [±15] | 6254 [±24]   |
| 2030       | 4278 [±21] | 47804 [±69]  | 426 [±6]       | 5662 [±24] | 12793 [±35]  |
| Scenario 1 |            |              |                |            |              |
| 2010       | 182 [±4]   | 3033 [±16]   | 17 [±1]        | 225 [±4]   | 506 [±6]     |
| 2020       | 2046 [±13] | 24249 [±46]  | 195 [±4]       | 2480 [±15] | 6000 [±23]   |
| 2030       | 4199 [±20] | 46736 [±68]  | 411 [±6]       | 5229 [±23] | 12247 [±35]  |
| Scenario 2 |            |              |                |            |              |
| 2010       | 185 [±4]   | 3023 [±16]   | 17 [±1]        | 221 [±4]   | 500 [±6]     |
| 2020       | 2002 [±13] | 23303 [±45]  | 183 [±4]       | 2089 [±14] | 5566 [±22]   |
| 2030       | 4108 [±20] | 44991 [±66]  | 387 [±6]       | 4454 [±21] | 11286 [±33]  |

**Table A10. Cumulative incidence cases avoided from year 2010 [per 100000 of population in 2010] Austria**

| Year       | Cancers   | CHD & Stroke | Osteoarthritis | Diabetes   | Hypertension |
|------------|-----------|--------------|----------------|------------|--------------|
| Scenario 1 |           |              |                |            |              |
| 2010       | 1 [±5]    | 0 [±22]      | 0 [±2]         | 0 [±6]     | 0 [±9]       |
| 2020       | 40 [±18]  | 512 [±63]    | 11 [±6]        | 198 [±20]  | 254 [±31]    |
| 2030       | 79 [±26]  | 1068 [±87]   | 15 [±8]        | 433 [±30]  | 546 [±45]    |
| Scenario 2 |           |              |                |            |              |
| 2010       | -2 [±5]   | 10 [±22]     | 0 [±2]         | 3 [±6]     | 4 [±9]       |
| 2020       | 84 [±18]  | 1458 [±62]   | 23 [±6]        | 589 [±20]  | 688 [±31]    |
| 2030       | 170 [±26] | 2813 [±86]   | 39 [±8]        | 1208 [±28] | 1507 [±44]   |

**Table A11. Prevalence cases in year [per 100000] for Austria**

| Year       | Cancers    | CHD & Stroke | Osteoarthritis | Diabetes   | Hypertension |
|------------|------------|--------------|----------------|------------|--------------|
| Scenario 0 |            |              |                |            |              |
| 2010       | 1559 [±11] | 4763 [±20]   | 414 [±6]       | 3457 [±17] | 13069 [±32]  |
| 2020       | 1683 [±12] | 4721 [±20]   | 408 [±6]       | 2522 [±15] | 13030 [±34]  |
| 2030       | 1801 [±13] | 4841 [±22]   | 438 [±7]       | 2703 [±16] | 13610 [±37]  |
| Scenario 1 |            |              |                |            |              |
| 2010       | 1557 [±11] | 4757 [±20]   | 412 [±6]       | 3467 [±17] | 13048 [±32]  |
| 2020       | 1670 [±12] | 4622 [±20]   | 399 [±6]       | 2425 [±15] | 12857 [±34]  |
| 2030       | 1796 [±13] | 4777 [±22]   | 430 [±6]       | 2554 [±16] | 13352 [±36]  |
| Scenario 2 |            |              |                |            |              |
| 2010       | 1561 [±11] | 4757 [±20]   | 409 [±6]       | 3459 [±17] | 13016 [±32]  |
| 2020       | 1664 [±12] | 4503 [±20]   | 393 [±6]       | 2250 [±14] | 12643 [±33]  |
| 2030       | 1782 [±13] | 4639 [±21]   | 421 [±6]       | 2314 [±15] | 12903 [±35]  |

**Table A12. Prevalence cases avoided in year [per 100000] Austria**

| Year       | Cancers  | CHD & Stroke | Osteoarthritis | Diabetes  | Hypertension |
|------------|----------|--------------|----------------|-----------|--------------|
| Scenario 1 |          |              |                |           |              |
| 2010       | 2 [±16]  | 6 [±28]      | 2 [±8]         | 0 [±24]   | 21 [±46]     |
| 2020       | 13 [±16] | 99 [±27]     | 9 [±8]         | 97 [±20]  | 173 [±46]    |
| 2030       | 5 [±17]  | 64 [±28]     | 8 [±8]         | 149 [±21] | 258 [±46]    |
| Scenario 2 |          |              |                |           |              |
| 2010       | 0 [±16]  | 6 [±28]      | 5 [±8]         | 0 [±24]   | 53 [±46]     |
| 2020       | 19 [±16] | 218 [±27]    | 15 [±8]        | 272 [±20] | 387 [±45]    |
| 2030       | 19 [±17] | 202 [±28]    | 17 [±8]        | 389 [±20] | 707 [±46]    |

## Armenia

**Table A13. Cumulative incidence cases from year 2010 [per 100000 of population in 2010] for Armenia**

| Year       | Cancers    | CHD & Stroke | Osteoarthritis | Diabetes   | Hypertension |
|------------|------------|--------------|----------------|------------|--------------|
| Scenario 0 |            |              |                |            |              |
| 2010       | 115 [±3]   | 888 [±8]     | 15 [±1]        | 247 [±4]   | 641 [±7]     |
| 2020       | 1266 [±10] | 8079 [±25]   | 162 [±4]       | 2573 [±14] | 6866 [±23]   |
| 2030       | 2522 [±14] | 15084 [±34]  | 316 [±5]       | 4771 [±19] | 14350 [±34]  |
| Scenario 1 |            |              |                |            |              |
| 2010       | 115 [±3]   | 888 [±8]     | 16 [±1]        | 248 [±4]   | 638 [±7]     |
| 2020       | 1256 [±10] | 7961 [±25]   | 159 [±4]       | 2419 [±14] | 6739 [±23]   |
| 2030       | 2496 [±14] | 14847 [±34]  | 309 [±5]       | 4490 [±19] | 14022 [±33]  |
| Scenario 2 |            |              |                |            |              |
| 2010       | 116 [±3]   | 885 [±8]     | 14 [±1]        | 247 [±4]   | 639 [±7]     |
| 2020       | 1225 [±10] | 7595 [±24]   | 147 [±3]       | 2069 [±13] | 6461 [±23]   |
| 2030       | 2435 [±14] | 14233 [±33]  | 295 [±5]       | 3817 [±17] | 13408 [±32]  |

**Table A14. Cumulative incidence cases avoided from year 2010 [per 100000 of population in 2010] for Armenia**

| Year       | Cancers  | CHD & Stroke | Osteoarthritis | Diabetes  | Hypertension |
|------------|----------|--------------|----------------|-----------|--------------|
| Scenario 1 |          |              |                |           |              |
| 2010       | 0 [±4]   | 0 [±12]      | -1 [±2]        | -1 [±6]   | 3 [±10]      |
| 2020       | 10 [±14] | 118 [±36]    | 3 [±5]         | 154 [±20] | 127 [±33]    |
| 2030       | 26 [±20] | 237 [±49]    | 7 [±7]         | 281 [±27] | 328 [±48]    |
| Scenario 2 |          |              |                |           |              |
| 2010       | -1 [±4]  | 3 [±12]      | 1 [±2]         | 0 [±6]    | 2 [±10]      |
| 2020       | 41 [±14] | 484 [±35]    | 15 [±5]        | 504 [±19] | 405 [±33]    |
| 2030       | 87 [±20] | 851 [±48]    | 21 [±7]        | 954 [±26] | 942 [±47]    |

**Table A15. Prevalence cases in year [per 100000] for Armenia**

| Year       | Cancers   | CHD & Stroke | Osteoarthritis | Diabetes   | Hypertension |
|------------|-----------|--------------|----------------|------------|--------------|
| Scenario 0 |           |              |                |            |              |
| 2010       | 855 [±8]  | 1423 [±11]   | 316 [±5]       | 5933 [±22] | 26724 [±46]  |
| 2020       | 952 [±9]  | 1816 [±12]   | 301 [±5]       | 5456 [±21] | 26337 [±46]  |
| 2030       | 1046 [±9] | 1887 [±12]   | 328 [±5]       | 5542 [±21] | 28023 [±47]  |
| Scenario 1 |           |              |                |            |              |
| 2010       | 859 [±8]  | 1424 [±11]   | 320 [±5]       | 5926 [±22] | 26711 [±46]  |
| 2020       | 944 [±9]  | 1799 [±12]   | 301 [±5]       | 5331 [±20] | 26234 [±45]  |
| 2030       | 1029 [±9] | 1864 [±12]   | 327 [±5]       | 5356 [±21] | 27758 [±47]  |
| Scenario 2 |           |              |                |            |              |
| 2010       | 853 [±8]  | 1425 [±11]   | 318 [±5]       | 5917 [±22] | 26705 [±46]  |
| 2020       | 930 [±9]  | 1737 [±12]   | 292 [±5]       | 5092 [±20] | 26056 [±45]  |
| 2030       | 1025 [±9] | 1809 [±12]   | 318 [±5]       | 4917 [±20] | 27326 [±46]  |

**Table A16. Prevalence cases avoided in year [per 100000] for Armenia**

| Year       | Cancers  | CHD & Stroke | Osteoarthritis | Diabetes  | Hypertension |
|------------|----------|--------------|----------------|-----------|--------------|
| Scenario 1 |          |              |                |           |              |
| 2010       | -4 [±12] | -1 [±15]     | -4 [±7]        | 7 [±31]   | 13 [±65]     |
| 2020       | 8 [±12]  | 17 [±17]     | 0 [±7]         | 125 [±29] | 103 [±65]    |
| 2030       | 17 [±13] | 23 [±17]     | 1 [±7]         | 186 [±30] | 265 [±67]    |
| Scenario 2 |          |              |                |           |              |
| 2010       | 2 [±12]  | -2 [±15]     | -2 [±7]        | 16 [±31]  | 19 [±65]     |
| 2020       | 22 [±12] | 79 [±17]     | 9 [±7]         | 364 [±29] | 281 [±65]    |
| 2030       | 21 [±13] | 78 [±17]     | 10 [±7]        | 625 [±29] | 697 [±67]    |

## Azerbaijan

**Table A17. Cumulative incidence cases from year 2010 [per 100000 of population in 2010] for Azerbaijan**

| Year       | Cancers    | CHD & Stroke | Osteoarthritis | Diabetes   | Hypertension |
|------------|------------|--------------|----------------|------------|--------------|
| Scenario 0 |            |              |                |            |              |
| 2010       | 61 [±2]    | 2232 [±13]   | 13 [±1]        | 105 [±3]   | 449 [±6]     |
| 2020       | 669 [±7]   | 17162 [±37]  | 133 [±3]       | 1126 [±9]  | 4965 [±20]   |
| 2030       | 1307 [±10] | 30683 [±49]  | 251 [±4]       | 2148 [±13] | 9870 [±28]   |
| Scenario 1 |            |              |                |            |              |
| 2010       | 62 [±2]    | 2220 [±13]   | 12 [±1]        | 107 [±3]   | 445 [±6]     |
| 2020       | 665 [±7]   | 17008 [±37]  | 129 [±3]       | 1065 [±9]  | 4823 [±19]   |
| 2030       | 1300 [±10] | 30437 [±49]  | 247 [±4]       | 1999 [±12] | 9522 [±27]   |
| Scenario 2 |            |              |                |            |              |
| 2010       | 60 [±2]    | 2231 [±13]   | 13 [±1]        | 110 [±3]   | 444 [±6]     |
| 2020       | 641 [±7]   | 16616 [±36]  | 123 [±3]       | 895 [±8]   | 4573 [±19]   |
| 2030       | 1257 [±10] | 29810 [±48]  | 234 [±4]       | 1690 [±11] | 9029 [±27]   |

**Table A18. Cumulative incidence cases avoided from year 2010 [per 100000 of population in 2010] for Azerbaijan**

| Year       | Cancers  | CHD & Stroke | Osteoarthritis | Diabetes  | Hypertension |
|------------|----------|--------------|----------------|-----------|--------------|
| Scenario 1 |          |              |                |           |              |
| 2010       | 0 [±4]   | 0 [±12]      | -1 [±2]        | -1 [±6]   | 3 [±10]      |
| 2020       | 10 [±14] | 118 [±36]    | 3 [±5]         | 154 [±20] | 127 [±33]    |
| 2030       | 26 [±20] | 237 [±49]    | 7 [±7]         | 281 [±27] | 328 [±48]    |
| Scenario 2 |          |              |                |           |              |
| 2010       | -1 [±4]  | 3 [±12]      | 1 [±2]         | 0 [±6]    | 2 [±10]      |
| 2020       | 41 [±14] | 484 [±35]    | 15 [±5]        | 504 [±19] | 405 [±33]    |
| 2030       | 87 [±20] | 851 [±48]    | 21 [±7]        | 954 [±26] | 942 [±47]    |

**Table A19. Prevalence cases in year [per 100000] for Azerbaijan**

| Year       | Cancers   | CHD & Stroke | Osteoarthritis | Diabetes   | Hypertension |
|------------|-----------|--------------|----------------|------------|--------------|
| Scenario 0 |           |              |                |            |              |
| 2010       | 855 [±8]  | 1423 [±11]   | 316 [±5]       | 5933 [±22] | 26724 [±46]  |
| 2020       | 952 [±9]  | 1816 [±12]   | 301 [±5]       | 5456 [±21] | 26337 [±46]  |
| 2030       | 1046 [±9] | 1887 [±12]   | 328 [±5]       | 5542 [±21] | 28023 [±47]  |
| Scenario 1 |           |              |                |            |              |
| 2010       | 859 [±8]  | 1424 [±11]   | 320 [±5]       | 5926 [±22] | 26711 [±46]  |
| 2020       | 944 [±9]  | 1799 [±12]   | 301 [±5]       | 5331 [±20] | 26234 [±45]  |
| 2030       | 1029 [±9] | 1864 [±12]   | 327 [±5]       | 5356 [±21] | 27758 [±47]  |
| Scenario 2 |           |              |                |            |              |
| 2010       | 853 [±8]  | 1425 [±11]   | 318 [±5]       | 5917 [±22] | 26705 [±46]  |
| 2020       | 930 [±9]  | 1737 [±12]   | 292 [±5]       | 5092 [±20] | 26056 [±45]  |
| 2030       | 1025 [±9] | 1809 [±12]   | 318 [±5]       | 4917 [±20] | 27326 [±46]  |

**Table A20. Prevalence cases avoided in year [per 100000] for Azerbaijan**

| Year       | Cancers  | CHD & Stroke | Osteoarthritis | Diabetes  | Hypertension |
|------------|----------|--------------|----------------|-----------|--------------|
| Scenario 1 |          |              |                |           |              |
| 2010       | -4 [±12] | -1 [±15]     | -4 [±7]        | 7 [±31]   | 13 [±65]     |
| 2020       | 8 [±12]  | 17 [±17]     | 0 [±7]         | 125 [±29] | 103 [±65]    |
| 2030       | 17 [±13] | 23 [±17]     | 1 [±7]         | 186 [±30] | 265 [±67]    |
| Scenario 2 |          |              |                |           |              |
| 2010       | 2 [±12]  | -2 [±15]     | -2 [±7]        | 16 [±31]  | 19 [±65]     |
| 2020       | 22 [±12] | 79 [±17]     | 9 [±7]         | 364 [±29] | 281 [±65]    |
| 2030       | 21 [±13] | 78 [±17]     | 10 [±7]        | 625 [±29] | 697 [±67]    |

## Belarus

**Table A21. Cumulative incidence cases from year 2010 [per 100000 of population in 2010] for Belarus**

| Year       | Cancers    | CHD & Stroke | Osteoarthritis | Diabetes   | Hypertension |
|------------|------------|--------------|----------------|------------|--------------|
| Scenario 0 |            |              |                |            |              |
| 2010       | 148 [±3]   | 714 [±8]     | 17 [±1]        | 276 [±5]   | 1003 [±9]    |
| 2020       | 1780 [±12] | 8396 [±26]   | 195 [±4]       | 3204 [±16] | 11195 [±31]  |
| 2030       | 3815 [±19] | 18167 [±40]  | 422 [±6]       | 6810 [±25] | 22512 [±45]  |
| Scenario 1 |            |              |                |            |              |
| 2010       | 146 [±3]   | 715 [±8]     | 17 [±1]        | 277 [±5]   | 1004 [±9]    |
| 2020       | 1739 [±12] | 8255 [±26]   | 195 [±4]       | 2955 [±16] | 10860 [±30]  |
| 2030       | 3737 [±18] | 17785 [±40]  | 418 [±6]       | 6312 [±24] | 21991 [±44]  |
| Scenario 2 |            |              |                |            |              |
| 2010       | 147 [±3]   | 717 [±8]     | 17 [±1]        | 276 [±5]   | 1002 [±9]    |
| 2020       | 1697 [±12] | 7936 [±26]   | 183 [±4]       | 2501 [±14] | 10323 [±29]  |
| 2030       | 3598 [±18] | 17067 [±39]  | 396 [±6]       | 5340 [±22] | 20872 [±43]  |

**Table A22. Cumulative incidence cases avoided from year 2010 [per 100000 of population in 2010] for Belarus**

| Year       | Cancers   | CHD & Stroke | Osteoarthritis | Diabetes   | Hypertension |
|------------|-----------|--------------|----------------|------------|--------------|
| Scenario 1 |           |              |                |            |              |
| 2010       | 2 [±5]    | -1 [±11]     | 0 [±2]         | -1 [±7]    | -1 [±13]     |
| 2020       | 41 [±17]  | 141 [±36]    | 0 [±6]         | 249 [±22]  | 335 [±42]    |
| 2030       | 78 [±25]  | 382 [±54]    | 4 [±8]         | 498 [±32]  | 521 [±60]    |
| Scenario 2 |           |              |                |            |              |
| 2010       | 1 [±5]    | -3 [±11]     | 0 [±2]         | 0 [±7]     | 1 [±13]      |
| 2020       | 83 [±17]  | 460 [±36]    | 12 [±5]        | 703 [±21]  | 872 [±41]    |
| 2030       | 217 [±24] | 1100 [±53]   | 26 [±8]        | 1470 [±31] | 1640 [±59]   |



**Table A23. Prevalence cases in year [per 100000] for Belarus**

| Year       | Cancers    | CHD & Stroke | Osteoarthritis | Diabetes   | Hypertension |
|------------|------------|--------------|----------------|------------|--------------|
| Scenario 0 |            |              |                |            |              |
| 2010       | 1436 [±11] | 3046 [±16]   | 388 [±6]       | 6321 [±22] | 34492 [±53]  |
| 2020       | 1742 [±12] | 4279 [±19]   | 420 [±6]       | 7155 [±24] | 38390 [±56]  |
| 2030       | 2011 [±13] | 5267 [±22]   | 481 [±7]       | 7989 [±27] | 41598 [±61]  |
| Scenario 1 |            |              |                |            |              |
| 2010       | 1428 [±11] | 3051 [±16]   | 388 [±6]       | 6318 [±22] | 34490 [±53]  |
| 2020       | 1715 [±12] | 4207 [±19]   | 422 [±6]       | 6950 [±24] | 38115 [±56]  |
| 2030       | 1980 [±13] | 5166 [±22]   | 479 [±7]       | 7664 [±26] | 41245 [±61]  |
| Scenario 2 |            |              |                |            |              |
| 2010       | 1436 [±11] | 3044 [±16]   | 384 [±6]       | 6306 [±22] | 34446 [±52]  |
| 2020       | 1691 [±12] | 4092 [±18]   | 408 [±6]       | 6570 [±23] | 37605 [±56]  |
| 2030       | 1923 [±13] | 4984 [±21]   | 461 [±6]       | 6987 [±25] | 40353 [±60]  |

**Table A24. Prevalence cases avoided in year [per 100000] for Belarus**

| Year       | Cancers  | CHD & Stroke | Osteoarthritis | Diabetes   | Hypertension |
|------------|----------|--------------|----------------|------------|--------------|
| Scenario 1 |          |              |                |            |              |
| 2010       | 8 [±15]  | -5 [±22]     | 0 [±8]         | 3 [±32]    | 2 [±74]      |
| 2020       | 27 [±17] | 72 [±26]     | -2 [±8]        | 205 [±34]  | 275 [±78]    |
| 2030       | 31 [±18] | 101 [±29]    | 2 [±9]         | 325 [±35]  | 353 [±81]    |
| Scenario 2 |          |              |                |            |              |
| 2010       | 0 [±15]  | 2 [±22]      | 4 [±8]         | 15 [±32]   | 46 [±74]     |
| 2020       | 51 [±17] | 187 [±26]    | 12 [±8]        | 585 [±33]  | 785 [±78]    |
| 2030       | 88 [±18] | 283 [±29]    | 20 [±9]        | 1002 [±35] | 1245 [±81]   |

## Belgium

**Table A25. Cumulative incidence cases from year 2010 [per 100000 of population in 2010] for Belgium**

| Year       | Cancers    | CHD & Stroke | Osteoarthritis | Diabetes   | Hypertension |
|------------|------------|--------------|----------------|------------|--------------|
| Scenario 0 |            |              |                |            |              |
| 2010       | 245 [±4]   | 940 [±9]     | 853 [±8]       | 266 [±5]   | 785 [±8]     |
| 2020       | 2764 [±15] | 9773 [±28]   | 9921 [±29]     | 2942 [±16] | 8756 [±27]   |
| 2030       | 5488 [±22] | 19130 [±41]  | 20051 [±41]    | 6007 [±23] | 17459 [±39]  |
| Scenario 1 |            |              |                |            |              |
| 2010       | 245 [±4]   | 939 [±9]     | 857 [±8]       | 262 [±5]   | 774 [±8]     |
| 2020       | 2742 [±15] | 9627 [±28]   | 9781 [±28]     | 2794 [±15] | 8536 [±27]   |
| 2030       | 5434 [±22] | 18771 [±40]  | 19744 [±41]    | 5728 [±22] | 16973 [±38]  |
| Scenario 2 |            |              |                |            |              |
| 2010       | 245 [±4]   | 932 [±9]     | 854 [±8]       | 263 [±5]   | 773 [±8]     |
| 2020       | 2681 [±15] | 9156 [±27]   | 9310 [±28]     | 2413 [±14] | 7993 [±26]   |
| 2030       | 5300 [±21] | 17848 [±39]  | 18953 [±40]    | 4952 [±21] | 15931 [±37]  |

**Table A26. Cumulative incidence cases avoided from year 2010 [per 100000 of population in 2010] Belgium**

| Year       | Cancers   | CHD & Stroke | Osteoarthritis | Diabetes   | Hypertension |
|------------|-----------|--------------|----------------|------------|--------------|
| Scenario 1 |           |              |                |            |              |
| 2010       | 0 [±6]    | 1 [±12]      | 0 [±12]        | 4 [±6]     | 11 [±11]     |
| 2020       | 22 [±21]  | 146 [±39]    | 140 [±40]      | 148 [±21]  | 220 [±37]    |
| 2030       | 54 [±30]  | 359 [±55]    | 307 [±56]      | 279 [±31]  | 486 [±52]    |
| Scenario 2 |           |              |                |            |              |
| 2010       | 0 [±6]    | 8 [±12]      | 0 [±12]        | 3 [±7]     | 12 [±11]     |
| 2020       | 83 [±21]  | 617 [±39]    | 611 [±39]      | 529 [±21]  | 763 [±37]    |
| 2030       | 188 [±29] | 1282 [±54]   | 1098 [±56]     | 1055 [±30] | 1528 [±52]   |

**Table A27. Prevalence cases in year [per 100000] for Belgium**

| Year       | Cancers    | CHD & Stroke | Osteoarthritis | Diabetes   | Hypertension |
|------------|------------|--------------|----------------|------------|--------------|
| Scenario 0 |            |              |                |            |              |
| 2010       | 2285 [±14] | 2052 [±13]   | 18497 [±38]    | 3900 [±18] | 16167 [±36]  |
| 2020       | 2502 [±14] | 2557 [±15]   | 18697 [±39]    | 3415 [±17] | 16692 [±37]  |
| 2030       | 2655 [±15] | 2770 [±15]   | 19770 [±41]    | 3580 [±18] | 17569 [±39]  |
| Scenario 1 |            |              |                |            |              |
| 2010       | 2291 [±14] | 2054 [±13]   | 18497 [±38]    | 3890 [±18] | 16189 [±36]  |
| 2020       | 2496 [±14] | 2521 [±14]   | 18600 [±39]    | 3333 [±17] | 16552 [±37]  |
| 2030       | 2635 [±15] | 2709 [±15]   | 19613 [±41]    | 3460 [±17] | 17278 [±38]  |
| Scenario 2 |            |              |                |            |              |
| 2010       | 2280 [±14] | 2045 [±13]   | 18461 [±38]    | 3889 [±18] | 16172 [±36]  |
| 2020       | 2468 [±14] | 2418 [±14]   | 18296 [±39]    | 3135 [±16] | 16215 [±37]  |
| 2030       | 2616 [±15] | 2613 [±15]   | 19275 [±41]    | 3154 [±16] | 16760 [±38]  |

**Table A28. Prevalence cases avoided in year [per 100000] Belgium**

| Year       | Cancers  | CHD & Stroke | Osteoarthritis | Diabetes  | Hypertension |
|------------|----------|--------------|----------------|-----------|--------------|
| Scenario 1 |          |              |                |           |              |
| 2010       | 0 [±19]  | 0 [±18]      | 0 [±54]        | 10 [±25]  | 0 [±51]      |
| 2020       | 6 [±20]  | 36 [±20]     | 97 [±55]       | 82 [±23]  | 140 [±52]    |
| 2030       | 20 [±21] | 61 [±21]     | 157 [±56]      | 120 [±24] | 291 [±53]    |
| Scenario 2 |          |              |                |           |              |
| 2010       | 5 [±19]  | 7 [±18]      | 36 [±54]       | 11 [±25]  | -5 [±51]     |
| 2020       | 34 [±20] | 139 [±20]    | 401 [±54]      | 280 [±23] | 477 [±51]    |
| 2030       | 39 [±21] | 157 [±21]    | 495 [±56]      | 426 [±23] | 809 [±52]    |

## Bosnia &amp; Herzegovina

**Table A29. Cumulative incidence cases from year 2010 [per 100000 of population in 2010] for Bosnia and Herzegovina**

| Year       | Cancers    | CHD & Stroke | Osteoarthritis | Diabetes   | Hypertension |
|------------|------------|--------------|----------------|------------|--------------|
| Scenario 0 |            |              |                |            |              |
| 2010       | 114 [±3]   | 631 [±7]     | 17 [±1]        | 251 [±4]   | 855 [±8]     |
| 2020       | 1339 [±11] | 7268 [±25]   | 191 [±4]       | 2828 [±15] | 9452 [±28]   |
| 2030       | 2751 [±16] | 15132 [±37]  | 380 [±6]       | 5493 [±22] | 18477 [±40]  |
| Scenario 1 |            |              |                |            |              |
| 2010       | 113 [±3]   | 625 [±7]     | 16 [±1]        | 249 [±4]   | 858 [±8]     |
| 2020       | 1323 [±10] | 7228 [±24]   | 184 [±4]       | 2627 [±15] | 9151 [±28]   |
| 2030       | 2714 [±15] | 15024 [±36]  | 366 [±6]       | 5124 [±21] | 17847 [±40]  |
| Scenario 2 |            |              |                |            |              |
| 2010       | 114 [±3]   | 630 [±7]     | 17 [±1]        | 253 [±4]   | 857 [±8]     |
| 2020       | 1281 [±10] | 7165 [±24]   | 175 [±4]       | 2204 [±14] | 8507 [±27]   |
| 2030       | 2620 [±15] | 14843 [±36]  | 346 [±6]       | 4288 [±19] | 16661 [±38]  |

**Table A30. Cumulative incidence cases avoided from year 2010 [per 100000 of population in 2010] for Bosnia and Herzegovina**

| Year       | Cancers   | CHD & Stroke | Osteoarthritis | Diabetes   | Hypertension |
|------------|-----------|--------------|----------------|------------|--------------|
| Scenario 1 |           |              |                |            |              |
| 2010       | 1 [±4]    | 6 [±10]      | 1 [±2]         | 2 [±6]     | -3 [±12]     |
| 2020       | 16 [±15]  | 40 [±34]     | 7 [±5]         | 201 [±21]  | 301 [±39]    |
| 2030       | 37 [±21]  | 108 [±49]    | 14 [±8]        | 369 [±29]  | 630 [±54]    |
| Scenario 2 |           |              |                |            |              |
| 2010       | 0 [±4]    | 1 [±10]      | 0 [±2]         | -2 [±6]    | -2 [±12]     |
| 2020       | 58 [±14]  | 103 [±34]    | 16 [±5]        | 624 [±20]  | 945 [±38]    |
| 2030       | 131 [±21] | 289 [±49]    | 34 [±8]        | 1205 [±28] | 1816 [±53]   |

**Table A31. Prevalence cases in year [per 100000] for Bosnia and Herzegovina**

| Year       | Cancers    | CHD & Stroke | Osteoarthritis | Diabetes   | Hypertension |
|------------|------------|--------------|----------------|------------|--------------|
| Scenario 0 |            |              |                |            |              |
| 2010       | 845 [±8]   | 2351 [±14]   | 378 [±6]       | 6659 [±23] | 25035 [±45]  |
| 2020       | 1039 [±9]  | 3216 [±16]   | 422 [±6]       | 7371 [±25] | 28209 [±48]  |
| 2030       | 1141 [±10] | 3742 [±18]   | 459 [±6]       | 7847 [±26] | 30438 [±52]  |
| Scenario 1 |            |              |                |            |              |
| 2010       | 841 [±8]   | 2342 [±14]   | 373 [±5]       | 6659 [±23] | 25046 [±45]  |
| 2020       | 1031 [±9]  | 3202 [±16]   | 416 [±6]       | 7181 [±24] | 27921 [±48]  |
| 2030       | 1132 [±10] | 3718 [±18]   | 450 [±6]       | 7532 [±26] | 29882 [±51]  |
| Scenario 2 |            |              |                |            |              |
| 2010       | 843 [±8]   | 2348 [±14]   | 375 [±5]       | 6651 [±23] | 25033 [±45]  |
| 2020       | 1011 [±9]  | 3181 [±16]   | 409 [±6]       | 6799 [±24] | 27314 [±48]  |
| 2030       | 1100 [±10] | 3670 [±18]   | 434 [±6]       | 6868 [±25] | 28862 [±51]  |

**Table A32. Prevalence cases avoided in year [per 100000] for Bosnia and Herzegovina**

| Year       | Cancers  | CHD & Stroke | Osteoarthritis | Diabetes  | Hypertension |
|------------|----------|--------------|----------------|-----------|--------------|
| Scenario 1 |          |              |                |           |              |
| 2010       | 4 [±12]  | 9 [±19]      | 5 [±8]         | 0 [±33]   | -11 [±63]    |
| 2020       | 8 [±13]  | 14 [±23]     | 6 [±8]         | 190 [±34] | 288 [±67]    |
| 2030       | 9 [±13]  | 24 [±24]     | 9 [±9]         | 315 [±35] | 556 [±69]    |
| Scenario 2 |          |              |                |           |              |
| 2010       | 2 [±12]  | 3 [±19]      | 3 [±8]         | 8 [±33]   | 2 [±63]      |
| 2020       | 28 [±13] | 35 [±23]     | 13 [±8]        | 572 [±34] | 895 [±67]    |
| 2030       | 41 [±13] | 72 [±24]     | 25 [±8]        | 979 [±34] | 1576 [±69]   |

## Bulgaria

**Table A33. Cumulative incidence cases from year 2010 [per 100000 of population in 2010] for Bulgaria**

| Year       | Cancers           | CHD & Stroke       | Osteoarthritis  | Diabetes          | Hypertension       |
|------------|-------------------|--------------------|-----------------|-------------------|--------------------|
| Scenario 0 |                   |                    |                 |                   |                    |
| 2010       | 171 [ $\pm 4$ ]   | 1406 [ $\pm 11$ ]  | 18 [ $\pm 1$ ]  | 233 [ $\pm 4$ ]   | 705 [ $\pm 8$ ]    |
| 2020       | 1933 [ $\pm 13$ ] | 12944 [ $\pm 34$ ] | 215 [ $\pm 4$ ] | 2856 [ $\pm 16$ ] | 8520 [ $\pm 27$ ]  |
| 2030       | 3974 [ $\pm 20$ ] | 25378 [ $\pm 50$ ] | 445 [ $\pm 7$ ] | 5957 [ $\pm 24$ ] | 17732 [ $\pm 42$ ] |
| Scenario 1 |                   |                    |                 |                   |                    |
| 2010       | 170 [ $\pm 4$ ]   | 1410 [ $\pm 11$ ]  | 19 [ $\pm 1$ ]  | 234 [ $\pm 4$ ]   | 696 [ $\pm 7$ ]    |
| 2020       | 1910 [ $\pm 13$ ] | 12760 [ $\pm 34$ ] | 215 [ $\pm 4$ ] | 2645 [ $\pm 15$ ] | 8225 [ $\pm 27$ ]  |
| 2030       | 3914 [ $\pm 20$ ] | 24915 [ $\pm 49$ ] | 439 [ $\pm 7$ ] | 5521 [ $\pm 23$ ] | 17183 [ $\pm 41$ ] |
| Scenario 2 |                   |                    |                 |                   |                    |
| 2010       | 171 [ $\pm 4$ ]   | 1407 [ $\pm 11$ ]  | 18 [ $\pm 1$ ]  | 231 [ $\pm 4$ ]   | 706 [ $\pm 8$ ]    |
| 2020       | 1842 [ $\pm 13$ ] | 12113 [ $\pm 33$ ] | 202 [ $\pm 4$ ] | 2173 [ $\pm 14$ ] | 7602 [ $\pm 26$ ]  |
| 2030       | 3779 [ $\pm 19$ ] | 23702 [ $\pm 48$ ] | 414 [ $\pm 6$ ] | 4569 [ $\pm 21$ ] | 15927 [ $\pm 39$ ] |

**Table A34. Cumulative incidence cases avoided from year 2010 [per 100000] Bulgaria**

| Year       | Cancers          | CHD & Stroke      | Osteoarthritis | Diabetes          | Hypertension      |
|------------|------------------|-------------------|----------------|-------------------|-------------------|
| Scenario 1 |                  |                   |                |                   |                   |
| 2010       | 1 [ $\pm 5$ ]    | -4 [ $\pm 15$ ]   | -1 [ $\pm 2$ ] | -1 [ $\pm 6$ ]    | 9 [ $\pm 11$ ]    |
| 2020       | 23 [ $\pm 18$ ]  | 184 [ $\pm 45$ ]  | 0 [ $\pm 6$ ]  | 211 [ $\pm 21$ ]  | 295 [ $\pm 37$ ]  |
| 2030       | 60 [ $\pm 25$ ]  | 463 [ $\pm 63$ ]  | 6 [ $\pm 8$ ]  | 436 [ $\pm 30$ ]  | 549 [ $\pm 53$ ]  |
| Scenario 2 |                  |                   |                |                   |                   |
| 2010       | 0 [ $\pm 5$ ]    | -1 [ $\pm 15$ ]   | 0 [ $\pm 2$ ]  | 2 [ $\pm 6$ ]     | -1 [ $\pm 11$ ]   |
| 2020       | 91 [ $\pm 17$ ]  | 831 [ $\pm 45$ ]  | 13 [ $\pm 6$ ] | 683 [ $\pm 20$ ]  | 918 [ $\pm 36$ ]  |
| 2030       | 195 [ $\pm 25$ ] | 1676 [ $\pm 63$ ] | 31 [ $\pm 8$ ] | 1388 [ $\pm 29$ ] | 1805 [ $\pm 52$ ] |

**Table A35. Prevalence cases in year [per 100000] for Bulgaria**

| Year       | Cancers           | CHD & Stroke      | Osteoarthritis  | Diabetes          | Hypertension       |
|------------|-------------------|-------------------|-----------------|-------------------|--------------------|
| Scenario 0 |                   |                   |                 |                   |                    |
| 2010       | 1047 [ $\pm 9$ ]  | 2342 [ $\pm 14$ ] | 406 [ $\pm 6$ ] | 6690 [ $\pm 23$ ] | 17721 [ $\pm 38$ ] |
| 2020       | 1152 [ $\pm 10$ ] | 2431 [ $\pm 15$ ] | 383 [ $\pm 6$ ] | 5910 [ $\pm 23$ ] | 17794 [ $\pm 40$ ] |
| 2030       | 1250 [ $\pm 11$ ] | 2576 [ $\pm 16$ ] | 404 [ $\pm 6$ ] | 6227 [ $\pm 25$ ] | 19104 [ $\pm 43$ ] |
| Scenario 1 |                   |                   |                 |                   |                    |
| 2010       | 1049 [ $\pm 9$ ]  | 2345 [ $\pm 14$ ] | 402 [ $\pm 6$ ] | 6691 [ $\pm 23$ ] | 17718 [ $\pm 38$ ] |
| 2020       | 1149 [ $\pm 10$ ] | 2416 [ $\pm 15$ ] | 380 [ $\pm 6$ ] | 5759 [ $\pm 23$ ] | 17587 [ $\pm 39$ ] |
| 2030       | 1227 [ $\pm 11$ ] | 2509 [ $\pm 16$ ] | 399 [ $\pm 6$ ] | 5936 [ $\pm 24$ ] | 18773 [ $\pm 43$ ] |
| Scenario 2 |                   |                   |                 |                   |                    |
| 2010       | 1047 [ $\pm 9$ ]  | 2341 [ $\pm 14$ ] | 406 [ $\pm 6$ ] | 6696 [ $\pm 23$ ] | 17749 [ $\pm 38$ ] |
| 2020       | 1122 [ $\pm 10$ ] | 2320 [ $\pm 14$ ] | 380 [ $\pm 6$ ] | 5467 [ $\pm 22$ ] | 17227 [ $\pm 39$ ] |
| 2030       | 1201 [ $\pm 11$ ] | 2413 [ $\pm 15$ ] | 391 [ $\pm 6$ ] | 5381 [ $\pm 23$ ] | 18096 [ $\pm 42$ ] |

**Table A36. Prevalence cases avoided in year [per 100000] Bulgaria**

| Year       | Cancers         | CHD & Stroke     | Osteoarthritis | Diabetes         | Hypertension      |
|------------|-----------------|------------------|----------------|------------------|-------------------|
| Scenario 1 |                 |                  |                |                  |                   |
| 2010       | -2 [ $\pm 13$ ] | -3 [ $\pm 19$ ]  | 4 [ $\pm 8$ ]  | -1 [ $\pm 33$ ]  | 3 [ $\pm 53$ ]    |
| 2020       | 3 [ $\pm 14$ ]  | 15 [ $\pm 20$ ]  | 3 [ $\pm 8$ ]  | 151 [ $\pm 31$ ] | 207 [ $\pm 53$ ]  |
| 2030       | 23 [ $\pm 14$ ] | 67 [ $\pm 20$ ]  | 5 [ $\pm 8$ ]  | 291 [ $\pm 31$ ] | 331 [ $\pm 55$ ]  |
| Scenario 2 |                 |                  |                |                  |                   |
| 2010       | 0 [ $\pm 13$ ]  | 1 [ $\pm 19$ ]   | 0 [ $\pm 8$ ]  | -6 [ $\pm 33$ ]  | -28 [ $\pm 53$ ]  |
| 2020       | 30 [ $\pm 13$ ] | 111 [ $\pm 19$ ] | 3 [ $\pm 8$ ]  | 443 [ $\pm 30$ ] | 567 [ $\pm 53$ ]  |
| 2030       | 49 [ $\pm 14$ ] | 163 [ $\pm 20$ ] | 13 [ $\pm 8$ ] | 846 [ $\pm 30$ ] | 1008 [ $\pm 55$ ] |

## Croatia

**Table A37. Cumulative incidence cases from year 2010 [per 100000 of population in 2010] for Croatia**

| Year       | Cancers           | CHD & Stroke       | Osteoarthritis  | Diabetes          | Hypertension       |
|------------|-------------------|--------------------|-----------------|-------------------|--------------------|
| Scenario 0 |                   |                    |                 |                   |                    |
| 2010       | 191 [ $\pm 4$ ]   | 1638 [ $\pm 11$ ]  | 21 [ $\pm 1$ ]  | 245 [ $\pm 4$ ]   | 725 [ $\pm 8$ ]    |
| 2020       | 2110 [ $\pm 13$ ] | 15814 [ $\pm 37$ ] | 237 [ $\pm 4$ ] | 2727 [ $\pm 15$ ] | 8294 [ $\pm 27$ ]  |
| 2030       | 4246 [ $\pm 20$ ] | 30803 [ $\pm 53$ ] | 473 [ $\pm 7$ ] | 5463 [ $\pm 22$ ] | 16797 [ $\pm 39$ ] |
| Scenario 1 |                   |                    |                 |                   |                    |
| 2010       | 190 [ $\pm 4$ ]   | 1636 [ $\pm 11$ ]  | 22 [ $\pm 1$ ]  | 241 [ $\pm 4$ ]   | 722 [ $\pm 8$ ]    |
| 2020       | 2083 [ $\pm 13$ ] | 15586 [ $\pm 36$ ] | 230 [ $\pm 4$ ] | 2546 [ $\pm 15$ ] | 8035 [ $\pm 26$ ]  |
| 2030       | 4209 [ $\pm 20$ ] | 30390 [ $\pm 53$ ] | 465 [ $\pm 7$ ] | 5067 [ $\pm 22$ ] | 16327 [ $\pm 39$ ] |
| Scenario 2 |                   |                    |                 |                   |                    |
| 2010       | 189 [ $\pm 4$ ]   | 1634 [ $\pm 11$ ]  | 21 [ $\pm 1$ ]  | 239 [ $\pm 4$ ]   | 725 [ $\pm 8$ ]    |
| 2020       | 2015 [ $\pm 13$ ] | 14946 [ $\pm 36$ ] | 216 [ $\pm 4$ ] | 2033 [ $\pm 13$ ] | 7402 [ $\pm 25$ ]  |
| 2030       | 4061 [ $\pm 19$ ] | 29012 [ $\pm 51$ ] | 434 [ $\pm 6$ ] | 4036 [ $\pm 19$ ] | 14990 [ $\pm 37$ ] |

**Table A38. Cumulative incidence cases avoided from year 2010 [per 100000 of population in 2010] for Croatia**

| Year       | Cancers          | CHD & Stroke      | Osteoarthritis | Diabetes          | Hypertension      |
|------------|------------------|-------------------|----------------|-------------------|-------------------|
| Scenario 1 |                  |                   |                |                   |                   |
| 2010       | 1 [ $\pm 6$ ]    | 2 [ $\pm 16$ ]    | -1 [ $\pm 2$ ] | 4 [ $\pm 6$ ]     | 3 [ $\pm 11$ ]    |
| 2020       | 27 [ $\pm 18$ ]  | 228 [ $\pm 50$ ]  | 7 [ $\pm 6$ ]  | 181 [ $\pm 21$ ]  | 259 [ $\pm 36$ ]  |
| 2030       | 37 [ $\pm 26$ ]  | 413 [ $\pm 70$ ]  | 8 [ $\pm 9$ ]  | 396 [ $\pm 29$ ]  | 470 [ $\pm 51$ ]  |
| Scenario 2 |                  |                   |                |                   |                   |
| 2010       | 2 [ $\pm 6$ ]    | 4 [ $\pm 16$ ]    | 0 [ $\pm 2$ ]  | 6 [ $\pm 6$ ]     | 0 [ $\pm 11$ ]    |
| 2020       | 95 [ $\pm 18$ ]  | 868 [ $\pm 50$ ]  | 21 [ $\pm 6$ ] | 694 [ $\pm 20$ ]  | 892 [ $\pm 35$ ]  |
| 2030       | 185 [ $\pm 26$ ] | 1791 [ $\pm 69$ ] | 39 [ $\pm 9$ ] | 1427 [ $\pm 28$ ] | 1807 [ $\pm 50$ ] |



**Table A39. Prevalence cases in year [per 100000] for Croatia**

| Year       | Cancers    | CHD & Stroke | Osteoarthritis | Diabetes   | Hypertension |
|------------|------------|--------------|----------------|------------|--------------|
| Scenario 0 |            |              |                |            |              |
| 2010       | 1169 [±10] | 5254 [±21]   | 449 [±6]       | 5814 [±22] | 16856 [±37]  |
| 2020       | 1276 [±10] | 5750 [±22]   | 426 [±6]       | 5615 [±22] | 17878 [±39]  |
| 2030       | 1364 [±11] | 6116 [±24]   | 442 [±6]       | 5941 [±23] | 19300 [±42]  |
| Scenario 1 |            |              |                |            |              |
| 2010       | 1162 [±10] | 5250 [±20]   | 448 [±6]       | 5812 [±22] | 16881 [±37]  |
| 2020       | 1264 [±10] | 5717 [±22]   | 422 [±6]       | 5498 [±22] | 17720 [±39]  |
| 2030       | 1368 [±11] | 6073 [±24]   | 440 [±6]       | 5681 [±23] | 19020 [±42]  |
| Scenario 2 |            |              |                |            |              |
| 2010       | 1159 [±10] | 5241 [±20]   | 446 [±6]       | 5800 [±22] | 16845 [±37]  |
| 2020       | 1245 [±10] | 5571 [±22]   | 416 [±6]       | 5145 [±21] | 17264 [±38]  |
| 2030       | 1336 [±11] | 5853 [±23]   | 426 [±6]       | 5034 [±21] | 18195 [±41]  |

**Table A40. Prevalence cases avoided in year [per 100000] for Croatia**

| Year       | Cancers  | CHD & Stroke | Osteoarthritis | Diabetes  | Hypertension |
|------------|----------|--------------|----------------|-----------|--------------|
| Scenario 1 |          |              |                |           |              |
| 2010       | 7 [±14]  | 4 [±29]      | 1 [±8]         | 2 [±30]   | -25 [±52]    |
| 2020       | 12 [±14] | 33 [±30]     | 4 [±8]         | 117 [±30] | 158 [±53]    |
| 2030       | -4 [±15] | 43 [±31]     | 2 [±8]         | 260 [±30] | 280 [±55]    |
| Scenario 2 |          |              |                |           |              |
| 2010       | 10 [±14] | 13 [±29]     | 3 [±8]         | 14 [±30]  | 11 [±52]     |
| 2020       | 31 [±14] | 179 [±30]    | 10 [±8]        | 470 [±29] | 614 [±53]    |
| 2030       | 28 [±15] | 263 [±31]    | 16 [±8]        | 907 [±30] | 1105 [±55]   |

## Cyprus

**Table A41. Cumulative incidence cases from year 2010 [per 100000 of population in 2010] for Cyprus**

| Year       | Cancers           | CHD & Stroke       | Osteoarthritis    | Diabetes          | Hypertension       |
|------------|-------------------|--------------------|-------------------|-------------------|--------------------|
| Scenario 0 |                   |                    |                   |                   |                    |
| 2010       | 105 [ $\pm 3$ ]   | 924 [ $\pm 9$ ]    | 181 [ $\pm 4$ ]   | 121 [ $\pm 3$ ]   | 573 [ $\pm 7$ ]    |
| 2020       | 1196 [ $\pm 10$ ] | 9939 [ $\pm 28$ ]  | 2095 [ $\pm 13$ ] | 1395 [ $\pm 10$ ] | 6471 [ $\pm 23$ ]  |
| 2030       | 2395 [ $\pm 14$ ] | 20261 [ $\pm 40$ ] | 4192 [ $\pm 18$ ] | 2923 [ $\pm 15$ ] | 13220 [ $\pm 32$ ] |
| Scenario 1 |                   |                    |                   |                   |                    |
| 2010       | 106 [ $\pm 3$ ]   | 917 [ $\pm 9$ ]    | 183 [ $\pm 4$ ]   | 124 [ $\pm 3$ ]   | 568 [ $\pm 7$ ]    |
| 2020       | 1186 [ $\pm 10$ ] | 9778 [ $\pm 28$ ]  | 2050 [ $\pm 13$ ] | 1316 [ $\pm 10$ ] | 6277 [ $\pm 22$ ]  |
| 2030       | 2367 [ $\pm 14$ ] | 19843 [ $\pm 40$ ] | 4102 [ $\pm 18$ ] | 2722 [ $\pm 15$ ] | 12814 [ $\pm 32$ ] |
| Scenario 2 |                   |                    |                   |                   |                    |
| 2010       | 104 [ $\pm 3$ ]   | 915 [ $\pm 9$ ]    | 183 [ $\pm 4$ ]   | 124 [ $\pm 3$ ]   | 574 [ $\pm 7$ ]    |
| 2020       | 1160 [ $\pm 10$ ] | 9283 [ $\pm 27$ ]  | 1944 [ $\pm 12$ ] | 1092 [ $\pm 9$ ]  | 5810 [ $\pm 21$ ]  |
| 2030       | 2312 [ $\pm 14$ ] | 18881 [ $\pm 39$ ] | 3896 [ $\pm 18$ ] | 2266 [ $\pm 13$ ] | 11882 [ $\pm 31$ ] |

**Table A42. Cumulative incidence cases avoided from year 2010 [per 100000 of population in 2010] Cyprus**

| Year       | Cancers         | CHD & Stroke      | Osteoarthritis   | Diabetes         | Hypertension      |
|------------|-----------------|-------------------|------------------|------------------|-------------------|
| Scenario 1 |                 |                   |                  |                  |                   |
| 2010       | 0 [ $\pm 4$ ]   | 7 [ $\pm 12$ ]    | 0 [ $\pm 5$ ]    | 0 [ $\pm 4$ ]    | 5 [ $\pm 10$ ]    |
| 2020       | 10 [ $\pm 14$ ] | 161 [ $\pm 40$ ]  | 45 [ $\pm 18$ ]  | 79 [ $\pm 15$ ]  | 194 [ $\pm 32$ ]  |
| 2030       | 28 [ $\pm 20$ ] | 418 [ $\pm 57$ ]  | 90 [ $\pm 26$ ]  | 201 [ $\pm 21$ ] | 406 [ $\pm 46$ ]  |
| Scenario 2 |                 |                   |                  |                  |                   |
| 2010       | 1 [ $\pm 4$ ]   | 9 [ $\pm 12$ ]    | -2 [ $\pm 5$ ]   | -3 [ $\pm 4$ ]   | -1 [ $\pm 10$ ]   |
| 2020       | 36 [ $\pm 14$ ] | 656 [ $\pm 39$ ]  | 151 [ $\pm 18$ ] | 303 [ $\pm 14$ ] | 661 [ $\pm 31$ ]  |
| 2030       | 83 [ $\pm 19$ ] | 1380 [ $\pm 56$ ] | 296 [ $\pm 25$ ] | 657 [ $\pm 20$ ] | 1338 [ $\pm 45$ ] |

**Table A43. Prevalence cases in year [per 100000] for Cyprus**

| Year       | Cancers    | CHD & Stroke | Osteoarthritis | Diabetes   | Hypertension |
|------------|------------|--------------|----------------|------------|--------------|
| Scenario 0 |            |              |                |            |              |
| 2010       | 1114 [±9]  | 4253 [±18]   | 3496 [±17]     | 1762 [±12] | 8899 [±27]   |
| 2020       | 1299 [±10] | 5098 [±20]   | 3837 [±17]     | 2017 [±13] | 10616 [±29]  |
| 2030       | 1454 [±11] | 5973 [±22]   | 4334 [±19]     | 2348 [±14] | 12448 [±32]  |
| Scenario 1 |            |              |                |            |              |
| 2010       | 1121 [±9]  | 4258 [±18]   | 3491 [±17]     | 1755 [±12] | 8899 [±27]   |
| 2020       | 1301 [±10] | 5013 [±20]   | 3787 [±17]     | 1954 [±12] | 10462 [±29]  |
| 2030       | 1437 [±11] | 5814 [±22]   | 4258 [±18]     | 2226 [±13] | 12171 [±31]  |
| Scenario 2 |            |              |                |            |              |
| 2010       | 1122 [±9]  | 4264 [±18]   | 3494 [±17]     | 1764 [±12] | 8918 [±27]   |
| 2020       | 1287 [±10] | 4791 [±19]   | 3721 [±17]     | 1804 [±12] | 10126 [±28]  |
| 2030       | 1422 [±11] | 5517 [±21]   | 4144 [±18]     | 1983 [±13] | 11614 [±30]  |

**Table A44. Prevalence cases avoided in year [per 100000] Cyprus**

| Year       | Cancers  | CHD & Stroke | Osteoarthritis | Diabetes  | Hypertension |
|------------|----------|--------------|----------------|-----------|--------------|
| Scenario 1 |          |              |                |           |              |
| 2010       | 0 [±13]  | 0 [±26]      | 5 [±24]        | 7 [±17]   | 0 [±38]      |
| 2020       | 0 [±14]  | 85 [±28]     | 50 [±25]       | 63 [±18]  | 154 [±41]    |
| 2030       | 17 [±15] | 159 [±31]    | 76 [±26]       | 122 [±19] | 277 [±44]    |
| Scenario 2 |          |              |                |           |              |
| 2010       | 0 [±13]  | -11 [±26]    | 2 [±24]        | -2 [±17]  | -19 [±38]    |
| 2020       | 12 [±14] | 307 [±28]    | 116 [±25]      | 213 [±17] | 490 [±41]    |
| 2030       | 32 [±15] | 456 [±30]    | 190 [±26]      | 365 [±19] | 834 [±44]    |

## Czech Republic

**Table A45. Cumulative incidence cases from year 2010 [per 100000 of population in 2010] for Czech Republic**

| Year       | Cancers           | CHD & Stroke       | Osteoarthritis  | Diabetes          | Hypertension       |
|------------|-------------------|--------------------|-----------------|-------------------|--------------------|
| Scenario 0 |                   |                    |                 |                   |                    |
| 2010       | 217 [ $\pm 4$ ]   | 1886 [ $\pm 12$ ]  | 19 [ $\pm 1$ ]  | 275 [ $\pm 5$ ]   | 758 [ $\pm 8$ ]    |
| 2020       | 2666 [ $\pm 16$ ] | 17906 [ $\pm 41$ ] | 255 [ $\pm 5$ ] | 3272 [ $\pm 18$ ] | 9443 [ $\pm 30$ ]  |
| 2030       | 6015 [ $\pm 27$ ] | 38310 [ $\pm 67$ ] | 571 [ $\pm 8$ ] | 7363 [ $\pm 29$ ] | 21071 [ $\pm 50$ ] |
| Scenario 1 |                   |                    |                 |                   |                    |
| 2010       | 219 [ $\pm 4$ ]   | 1882 [ $\pm 12$ ]  | 21 [ $\pm 1$ ]  | 273 [ $\pm 5$ ]   | 757 [ $\pm 8$ ]    |
| 2020       | 2663 [ $\pm 16$ ] | 17749 [ $\pm 41$ ] | 251 [ $\pm 5$ ] | 3065 [ $\pm 17$ ] | 9196 [ $\pm 30$ ]  |
| 2030       | 5980 [ $\pm 26$ ] | 37856 [ $\pm 67$ ] | 557 [ $\pm 8$ ] | 6867 [ $\pm 28$ ] | 20504 [ $\pm 49$ ] |
| Scenario 2 |                   |                    |                 |                   |                    |
| 2010       | 221 [ $\pm 4$ ]   | 1894 [ $\pm 12$ ]  | 21 [ $\pm 1$ ]  | 276 [ $\pm 5$ ]   | 759 [ $\pm 8$ ]    |
| 2020       | 2596 [ $\pm 16$ ] | 17007 [ $\pm 40$ ] | 239 [ $\pm 5$ ] | 2502 [ $\pm 15$ ] | 8488 [ $\pm 29$ ]  |
| 2030       | 5836 [ $\pm 26$ ] | 36230 [ $\pm 65$ ] | 532 [ $\pm 8$ ] | 5523 [ $\pm 25$ ] | 18756 [ $\pm 47$ ] |

**Table A46. Cumulative incidence cases avoided from year 2010 [per 100000 of population in 2010] Czech Republic**

| Year       | Cancers          | CHD & Stroke      | Osteoarthritis | Diabetes          | Hypertension      |
|------------|------------------|-------------------|----------------|-------------------|-------------------|
| Scenario 1 |                  |                   |                |                   |                   |
| 2010       | -2 [ $\pm 6$ ]   | 4 [ $\pm 17$ ]    | -2 [ $\pm 2$ ] | 2 [ $\pm 7$ ]     | 1 [ $\pm 11$ ]    |
| 2020       | 3 [ $\pm 21$ ]   | 157 [ $\pm 53$ ]  | 4 [ $\pm 6$ ]  | 207 [ $\pm 23$ ]  | 247 [ $\pm 39$ ]  |
| 2030       | 35 [ $\pm 31$ ]  | 454 [ $\pm 78$ ]  | 14 [ $\pm 9$ ] | 496 [ $\pm 34$ ]  | 567 [ $\pm 58$ ]  |
| Scenario 2 |                  |                   |                |                   |                   |
| 2010       | -4 [ $\pm 6$ ]   | -8 [ $\pm 17$ ]   | -2 [ $\pm 2$ ] | -1 [ $\pm 7$ ]    | -1 [ $\pm 11$ ]   |
| 2020       | 70 [ $\pm 21$ ]  | 899 [ $\pm 53$ ]  | 16 [ $\pm 6$ ] | 770 [ $\pm 21$ ]  | 955 [ $\pm 38$ ]  |
| 2030       | 179 [ $\pm 31$ ] | 2080 [ $\pm 77$ ] | 39 [ $\pm 9$ ] | 1840 [ $\pm 32$ ] | 2315 [ $\pm 56$ ] |

**Table A47. Prevalence cases in year [per 100000] for Czech Republic**

| Year       | Cancers    | CHD & Stroke | Osteoarthritis | Diabetes   | Hypertension |
|------------|------------|--------------|----------------|------------|--------------|
| Scenario 0 |            |              |                |            |              |
| 2010       | 1291 [±10] | 3494 [±17]   | 451 [±6]       | 6790 [±23] | 17597 [±38]  |
| 2020       | 1555 [±12] | 3740 [±19]   | 471 [±7]       | 6346 [±25] | 19800 [±44]  |
| 2030       | 1849 [±15] | 4363 [±23]   | 553 [±8]       | 7185 [±29] | 23371 [±52]  |
| Scenario 1 |            |              |                |            |              |
| 2010       | 1296 [±10] | 3486 [±17]   | 452 [±6]       | 6791 [±23] | 17621 [±38]  |
| 2020       | 1551 [±12] | 3707 [±19]   | 467 [±7]       | 6188 [±24] | 19640 [±43]  |
| 2030       | 1837 [±15] | 4318 [±22]   | 544 [±8]       | 6879 [±28] | 23017 [±52]  |
| Scenario 2 |            |              |                |            |              |
| 2010       | 1298 [±10] | 3500 [±17]   | 452 [±6]       | 6781 [±23] | 17639 [±38]  |
| 2020       | 1526 [±12] | 3607 [±19]   | 461 [±7]       | 5859 [±24] | 19226 [±43]  |
| 2030       | 1823 [±15] | 4187 [±22]   | 536 [±8]       | 6131 [±27] | 21972 [±51]  |

**Table A48. Prevalence cases avoided in year [per 100000] Czech Republic**

| Year       | Cancers  | CHD & Stroke | Osteoarthritis | Diabetes   | Hypertension |
|------------|----------|--------------|----------------|------------|--------------|
| Scenario 1 |          |              |                |            |              |
| 2010       | -5 [±14] | 8 [±24]      | -1 [±8]        | -1 [±33]   | -24 [±53]    |
| 2020       | 4 [±16]  | 33 [±24]     | 4 [±9]         | 158 [±32]  | 160 [±56]    |
| 2030       | 12 [±17] | 45 [±26]     | 9 [±9]         | 306 [±34]  | 354 [±61]    |
| Scenario 2 |          |              |                |            |              |
| 2010       | -7 [±14] | -6 [±24]     | -1 [±8]        | 9 [±33]    | -42 [±53]    |
| 2020       | 29 [±16] | 133 [±24]    | 10 [±9]        | 487 [±31]  | 574 [±56]    |
| 2030       | 26 [±17] | 176 [±26]    | 17 [±9]        | 1054 [±33] | 1399 [±60]   |

## Denmark

**Table A49. Cumulative incidence cases from year 2010 [per 100000 of population in 2010] for Denmark**

| Year       | Cancers    | CHD & Stroke | Osteoarthritis | Diabetes   | Hypertension |
|------------|------------|--------------|----------------|------------|--------------|
| Scenario 0 |            |              |                |            |              |
| 2010       | 250 [±4]   | 1330 [±10]   | 976 [±9]       | 296 [±5]   | 776 [±8]     |
| 2020       | 2844 [±16] | 12949 [±33]  | 11993 [±32]    | 3536 [±17] | 8810 [±27]   |
| 2030       | 5572 [±22] | 24645 [±47]  | 24016 [±47]    | 7348 [±26] | 17692 [±40]  |
| Scenario 1 |            |              |                |            |              |
| 2010       | 249 [±4]   | 1323 [±10]   | 981 [±9]       | 298 [±5]   | 779 [±8]     |
| 2020       | 2820 [±16] | 12694 [±33]  | 11789 [±32]    | 3323 [±17] | 8544 [±27]   |
| 2030       | 5510 [±22] | 24079 [±47]  | 23661 [±46]    | 6888 [±25] | 17139 [±39]  |
| Scenario 2 |            |              |                |            |              |
| 2010       | 248 [±4]   | 1317 [±10]   | 974 [±9]       | 300 [±5]   | 776 [±8]     |
| 2020       | 2744 [±15] | 12060 [±32]  | 11305 [±31]    | 2851 [±16] | 8023 [±26]   |
| 2030       | 5377 [±22] | 22831 [±45]  | 22825 [±45]    | 5958 [±23] | 16059 [±38]  |

**Table A50. Cumulative incidence cases avoided from year 2010 [per 100000 of population in 2010] Denmark**

| Year       | Cancers   | CHD & Stroke | Osteoarthritis | Diabetes   | Hypertension |
|------------|-----------|--------------|----------------|------------|--------------|
| Scenario 1 |           |              |                |            |              |
| 2010       | 1 [±6]    | 7 [±15]      | 0 [±13]        | 0 [±7]     | 0 [±11]      |
| 2020       | 24 [±21]  | 255 [±45]    | 204 [±44]      | 213 [±23]  | 266 [±37]    |
| 2030       | 62 [±30]  | 566 [±62]    | 355 [±62]      | 460 [±34]  | 553 [±53]    |
| Scenario 2 |           |              |                |            |              |
| 2010       | 2 [±6]    | 13 [±15]     | 2 [±12]        | -4 [±7]    | 0 [±11]      |
| 2020       | 100 [±21] | 889 [±45]    | 688 [±43]      | 685 [±23]  | 787 [±37]    |
| 2030       | 195 [±30] | 1814 [±62]   | 1191 [±61]     | 1390 [±33] | 1633 [±52]   |

**Table A51. Prevalence cases in year [per 100000] for Denmark**

| Year       | Cancers    | CHD & Stroke | Osteoarthritis | Diabetes   | Hypertension |
|------------|------------|--------------|----------------|------------|--------------|
| Scenario 0 |            |              |                |            |              |
| 2010       | 1918 [±12] | 2748 [±15]   | 21670 [±42]    | 5352 [±21] | 15920 [±36]  |
| 2020       | 1962 [±13] | 3063 [±16]   | 21199 [±43]    | 4344 [±19] | 15558 [±36]  |
| 2030       | 1974 [±13] | 3099 [±17]   | 21325 [±44]    | 4504 [±20] | 15810 [±38]  |
| Scenario 1 |            |              |                |            |              |
| 2010       | 1919 [±12] | 2733 [±15]   | 21624 [±42]    | 5371 [±21] | 15909 [±36]  |
| 2020       | 1971 [±13] | 3025 [±16]   | 21056 [±42]    | 4237 [±19] | 15365 [±36]  |
| 2030       | 1971 [±13] | 3031 [±17]   | 21166 [±44]    | 4319 [±20] | 15531 [±37]  |
| Scenario 2 |            |              |                |            |              |
| 2010       | 1903 [±12] | 2730 [±15]   | 21616 [±42]    | 5375 [±21] | 15891 [±36]  |
| 2020       | 1932 [±13] | 2916 [±16]   | 20809 [±42]    | 4005 [±18] | 15090 [±36]  |
| 2030       | 1957 [±13] | 2911 [±16]   | 20881 [±43]    | 3959 [±19] | 15031 [±37]  |

**Table A52. Prevalence cases avoided in year [per 100000] Denmark**

| Year       | Cancers  | CHD & Stroke | Osteoarthritis | Diabetes  | Hypertension |
|------------|----------|--------------|----------------|-----------|--------------|
| Scenario 1 |          |              |                |           |              |
| 2010       | 0 [±18]  | 15 [±21]     | 46 [±59]       | 0 [±29]   | 11 [±50]     |
| 2020       | 0 [±18]  | 38 [±22]     | 143 [±58]      | 107 [±26] | 193 [±50]    |
| 2030       | 3 [±18]  | 68 [±22]     | 159 [±58]      | 185 [±27] | 279 [±50]    |
| Scenario 2 |          |              |                |           |              |
| 2010       | 15 [±17] | 18 [±21]     | 54 [±59]       | -23 [±29] | 29 [±50]     |
| 2020       | 30 [±18] | 147 [±22]    | 390 [±58]      | 339 [±26] | 468 [±50]    |
| 2030       | 17 [±18] | 188 [±22]    | 444 [±58]      | 545 [±26] | 779 [±50]    |

## Estonia

**Table A53. Cumulative incidence cases from year 2010 [per 100000 of population in 2010] for Estonia**

| Year       | Cancers           | CHD & Stroke       | Osteoarthritis  | Diabetes          | Hypertension       |
|------------|-------------------|--------------------|-----------------|-------------------|--------------------|
| Scenario 0 |                   |                    |                 |                   |                    |
| 2010       | 180 [ $\pm 4$ ]   | 1705 [ $\pm 12$ ]  | 18 [ $\pm 1$ ]  | 209 [ $\pm 4$ ]   | 677 [ $\pm 7$ ]    |
| 2020       | 1827 [ $\pm 12$ ] | 14510 [ $\pm 35$ ] | 187 [ $\pm 4$ ] | 2350 [ $\pm 14$ ] | 7690 [ $\pm 26$ ]  |
| 2030       | 3521 [ $\pm 18$ ] | 26422 [ $\pm 49$ ] | 366 [ $\pm 6$ ] | 4536 [ $\pm 20$ ] | 15207 [ $\pm 37$ ] |
| Scenario 1 |                   |                    |                 |                   |                    |
| 2010       | 171 [ $\pm 4$ ]   | 1701 [ $\pm 12$ ]  | 16 [ $\pm 1$ ]  | 209 [ $\pm 4$ ]   | 682 [ $\pm 7$ ]    |
| 2020       | 1795 [ $\pm 12$ ] | 14341 [ $\pm 35$ ] | 183 [ $\pm 4$ ] | 2208 [ $\pm 14$ ] | 7487 [ $\pm 25$ ]  |
| 2030       | 3469 [ $\pm 18$ ] | 26092 [ $\pm 49$ ] | 352 [ $\pm 6$ ] | 4230 [ $\pm 20$ ] | 14766 [ $\pm 37$ ] |
| Scenario 2 |                   |                    |                 |                   |                    |
| 2010       | 174 [ $\pm 4$ ]   | 1701 [ $\pm 12$ ]  | 17 [ $\pm 1$ ]  | 212 [ $\pm 4$ ]   | 682 [ $\pm 7$ ]    |
| 2020       | 1735 [ $\pm 12$ ] | 13723 [ $\pm 34$ ] | 169 [ $\pm 4$ ] | 1808 [ $\pm 12$ ] | 6901 [ $\pm 24$ ]  |
| 2030       | 3365 [ $\pm 17$ ] | 24959 [ $\pm 47$ ] | 328 [ $\pm 5$ ] | 3455 [ $\pm 18$ ] | 13492 [ $\pm 35$ ] |

**Table A54. Cumulative incidence cases avoided from year 2010 [per 100000 of population in 2010] Estonia**

| Year       | Cancers          | CHD & Stroke      | Osteoarthritis | Diabetes          | Hypertension      |
|------------|------------------|-------------------|----------------|-------------------|-------------------|
| Scenario 1 |                  |                   |                |                   |                   |
| 2010       | 9 [ $\pm 5$ ]    | 4 [ $\pm 17$ ]    | 2 [ $\pm 2$ ]  | 0 [ $\pm 6$ ]     | -5 [ $\pm 10$ ]   |
| 2020       | 32 [ $\pm 17$ ]  | 169 [ $\pm 48$ ]  | 4 [ $\pm 5$ ]  | 142 [ $\pm 19$ ]  | 203 [ $\pm 35$ ]  |
| 2030       | 52 [ $\pm 24$ ]  | 330 [ $\pm 65$ ]  | 14 [ $\pm 8$ ] | 306 [ $\pm 26$ ]  | 441 [ $\pm 49$ ]  |
| Scenario 2 |                  |                   |                |                   |                   |
| 2010       | 6 [ $\pm 5$ ]    | 4 [ $\pm 17$ ]    | 1 [ $\pm 2$ ]  | -3 [ $\pm 6$ ]    | -5 [ $\pm 10$ ]   |
| 2020       | 92 [ $\pm 17$ ]  | 787 [ $\pm 48$ ]  | 18 [ $\pm 5$ ] | 542 [ $\pm 18$ ]  | 789 [ $\pm 34$ ]  |
| 2030       | 156 [ $\pm 23$ ] | 1463 [ $\pm 64$ ] | 38 [ $\pm 7$ ] | 1081 [ $\pm 25$ ] | 1715 [ $\pm 48$ ] |



**Table A55. Prevalence cases in year [per 100000] for Estonia**

| Year       | Cancers    | CHD & Stroke | Osteoarthritis | Diabetes   | Hypertension |
|------------|------------|--------------|----------------|------------|--------------|
| Scenario 0 |            |              |                |            |              |
| 2010       | 976 [±9]   | 3099 [±16]   | 392 [±6]       | 5422 [±21] | 16964 [±37]  |
| 2020       | 988 [±9]   | 2872 [±16]   | 343 [±5]       | 4494 [±20] | 15972 [±37]  |
| 2030       | 1003 [±10] | 2837 [±16]   | 340 [±6]       | 4515 [±20] | 16313 [±39]  |
| Scenario 1 |            |              |                |            |              |
| 2010       | 976 [±9]   | 3092 [±16]   | 392 [±6]       | 5415 [±21] | 16973 [±37]  |
| 2020       | 977 [±9]   | 2842 [±16]   | 340 [±5]       | 4388 [±19] | 15850 [±37]  |
| 2030       | 989 [±9]   | 2817 [±16]   | 333 [±5]       | 4301 [±20] | 16050 [±38]  |
| Scenario 2 |            |              |                |            |              |
| 2010       | 977 [±9]   | 3096 [±16]   | 390 [±6]       | 5418 [±21] | 16948 [±37]  |
| 2020       | 954 [±9]   | 2766 [±15]   | 331 [±5]       | 4127 [±19] | 15473 [±36]  |
| 2030       | 978 [±9]   | 2729 [±16]   | 322 [±5]       | 3865 [±19] | 15271 [±37]  |

**Table A56. Prevalence cases avoided in year [per 100000] Estonia**

| Year       | Cancers  | CHD & Stroke | Osteoarthritis | Diabetes  | Hypertension |
|------------|----------|--------------|----------------|-----------|--------------|
| Scenario 1 |          |              |                |           |              |
| 2010       | 0 [±12]  | 7 [±22]      | 0 [±8]         | 7 [±29]   | -9 [±52]     |
| 2020       | 11 [±13] | 30 [±21]     | 3 [±7]         | 106 [±27] | 122 [±50]    |
| 2030       | 14 [±13] | 20 [±21]     | 7 [±7]         | 214 [±27] | 263 [±51]    |
| Scenario 2 |          |              |                |           |              |
| 2010       | -1 [±12] | 3 [±22]      | 2 [±8]         | 4 [±29]   | 16 [±52]     |
| 2020       | 34 [±12] | 106 [±21]    | 12 [±7]        | 367 [±26] | 499 [±50]    |
| 2030       | 25 [±13] | 108 [±21]    | 18 [±7]        | 650 [±26] | 1042 [±50]   |

## Finland

**Table A57. Cumulative incidence cases from year 2010 [per 100000 of population in 2010] for Finland**

| Year       | Cancers    | CHD & Stroke | Osteoarthritis | Diabetes   | Hypertension |
|------------|------------|--------------|----------------|------------|--------------|
| Scenario 0 |            |              |                |            |              |
| 2010       | 294 [±5]   | 973 [±9]     | 392 [±6]       | 190 [±4]   | 635 [±7]     |
| 2020       | 3324 [±17] | 10028 [±29]  | 4243 [±19]     | 2174 [±13] | 7066 [±24]   |
| 2030       | 6460 [±24] | 19723 [±41]  | 8033 [±26]     | 4420 [±20] | 14024 [±35]  |
| Scenario 1 |            |              |                |            |              |
| 2010       | 294 [±5]   | 965 [±9]     | 395 [±6]       | 190 [±4]   | 634 [±7]     |
| 2020       | 3290 [±16] | 9913 [±29]   | 4165 [±19]     | 2026 [±13] | 6801 [±24]   |
| 2030       | 6405 [±23] | 19451 [±41]  | 7885 [±26]     | 4100 [±19] | 13480 [±34]  |
| Scenario 2 |            |              |                |            |              |
| 2010       | 296 [±5]   | 964 [±9]     | 399 [±6]       | 191 [±4]   | 632 [±7]     |
| 2020       | 3251 [±16] | 9623 [±28]   | 3946 [±18]     | 1698 [±12] | 6308 [±23]   |
| 2030       | 6325 [±23] | 18858 [±40]  | 7462 [±25]     | 3450 [±17] | 12471 [±33]  |

**Table A58. Cumulative incidence cases avoided from year 2010 [per 100000 of population in 2010] Finland**

| Year       | Cancers   | CHD & Stroke | Osteoarthritis | Diabetes  | Hypertension |
|------------|-----------|--------------|----------------|-----------|--------------|
| Scenario 1 |           |              |                |           |              |
| 2010       | 0 [±7]    | 8 [±12]      | 0 [±8]         | 0 [±6]    | 1 [±10]      |
| 2020       | 34 [±23]  | 115 [±40]    | 78 [±26]       | 148 [±18] | 265 [±33]    |
| 2030       | 55 [±32]  | 272 [±56]    | 148 [±36]      | 320 [±26] | 544 [±47]    |
| Scenario 2 |           |              |                |           |              |
| 2010       | 0 [±7]    | 9 [±12]      | 0 [±8]         | 0 [±6]    | 3 [±10]      |
| 2020       | 73 [±23]  | 405 [±40]    | 297 [±26]      | 476 [±18] | 758 [±33]    |
| 2030       | 135 [±32] | 865 [±56]    | 571 [±35]      | 970 [±25] | 1553 [±46]   |

**Table A59. Prevalence cases in year [per 100000] for Finland**

| Year       | Cancers    | CHD & Stroke | Osteoarthritis | Diabetes   | Hypertension |
|------------|------------|--------------|----------------|------------|--------------|
| Scenario 0 |            |              |                |            |              |
| 2010       | 6668 [±23] | 2578 [±14]   | 7456 [±24]     | 3441 [±17] | 15870 [±36]  |
| 2020       | 6013 [±22] | 3230 [±16]   | 7630 [±25]     | 3279 [±16] | 16644 [±37]  |
| 2030       | 5615 [±22] | 3402 [±17]   | 7651 [±26]     | 3449 [±17] | 17250 [±39]  |
| Scenario 1 |            |              |                |            |              |
| 2010       | 6652 [±23] | 2558 [±14]   | 7438 [±24]     | 3432 [±17] | 15847 [±36]  |
| 2020       | 5983 [±22] | 3204 [±16]   | 7564 [±25]     | 3166 [±16] | 16417 [±37]  |
| 2030       | 5590 [±22] | 3375 [±17]   | 7565 [±26]     | 3244 [±17] | 16847 [±38]  |
| Scenario 2 |            |              |                |            |              |
| 2010       | 6652 [±23] | 2565 [±14]   | 7456 [±24]     | 3439 [±17] | 15893 [±36]  |
| 2020       | 5968 [±22] | 3165 [±16]   | 7436 [±25]     | 2951 [±16] | 16104 [±36]  |
| 2030       | 5595 [±22] | 3308 [±17]   | 7340 [±25]     | 2889 [±16] | 16228 [±37]  |

**Table A60. Prevalence cases avoided in year [per 100000] Finland**

| Year       | Cancers  | CHD & Stroke | Osteoarthritis | Diabetes  | Hypertension |
|------------|----------|--------------|----------------|-----------|--------------|
| Scenario 1 |          |              |                |           |              |
| 2010       | 2 [±20]  | 0 [±29]      | 0 [±35]        | 2 [±20]   | 0 [±69]      |
| 2020       | 21 [±22] | 74 [±33]     | 24 [±37]       | 109 [±22] | 215 [±76]    |
| 2030       | 0 [±23]  | 194 [±36]    | 93 [±40]       | 221 [±24] | 474 [±81]    |
| Scenario 2 |          |              |                |           |              |
| 2010       | 0 [±20]  | 0 [±29]      | 0 [±35]        | 0 [±20]   | 0 [±69]      |
| 2020       | 46 [±22] | 380 [±33]    | 224 [±37]      | 371 [±22] | 697 [±75]    |
| 2030       | 55 [±23] | 641 [±35]    | 362 [±39]      | 610 [±23] | 1375 [±81]   |

## France

**Table A61. Cumulative incidence cases from year 2010 [per 100000 of population in 2010] for France**

| Year       | Cancers           | CHD & Stroke       | Osteoarthritis  | Diabetes          | Hypertension       |
|------------|-------------------|--------------------|-----------------|-------------------|--------------------|
| Scenario 0 |                   |                    |                 |                   |                    |
| 2010       | 213 [ $\pm 4$ ]   | 897 [ $\pm 8$ ]    | 16 [ $\pm 1$ ]  | 199 [ $\pm 4$ ]   | 1353 [ $\pm 10$ ]  |
| 2020       | 2481 [ $\pm 14$ ] | 9407 [ $\pm 28$ ]  | 183 [ $\pm 4$ ] | 2426 [ $\pm 14$ ] | 14376 [ $\pm 34$ ] |
| 2030       | 4897 [ $\pm 20$ ] | 18475 [ $\pm 39$ ] | 371 [ $\pm 6$ ] | 5114 [ $\pm 21$ ] | 27688 [ $\pm 48$ ] |
| Scenario 1 |                   |                    |                 |                   |                    |
| 2010       | 214 [ $\pm 4$ ]   | 907 [ $\pm 9$ ]    | 17 [ $\pm 1$ ]  | 201 [ $\pm 4$ ]   | 1357 [ $\pm 10$ ]  |
| 2020       | 2446 [ $\pm 14$ ] | 9289 [ $\pm 27$ ]  | 181 [ $\pm 4$ ] | 2252 [ $\pm 14$ ] | 14067 [ $\pm 34$ ] |
| 2030       | 4835 [ $\pm 20$ ] | 18148 [ $\pm 39$ ] | 362 [ $\pm 5$ ] | 4756 [ $\pm 20$ ] | 27196 [ $\pm 47$ ] |
| Scenario 2 |                   |                    |                 |                   |                    |
| 2010       | 214 [ $\pm 4$ ]   | 898 [ $\pm 8$ ]    | 17 [ $\pm 1$ ]  | 194 [ $\pm 4$ ]   | 1359 [ $\pm 10$ ]  |
| 2020       | 2398 [ $\pm 14$ ] | 8870 [ $\pm 27$ ]  | 173 [ $\pm 4$ ] | 1901 [ $\pm 12$ ] | 13496 [ $\pm 33$ ] |
| 2030       | 4733 [ $\pm 20$ ] | 17347 [ $\pm 38$ ] | 344 [ $\pm 5$ ] | 4060 [ $\pm 18$ ] | 26199 [ $\pm 47$ ] |

**Table A62. Cumulative incidence cases avoided from year 2010 [per 100000 of population in 2010] France**

| Year       | Cancers          | CHD & Stroke      | Osteoarthritis | Diabetes          | Hypertension      |
|------------|------------------|-------------------|----------------|-------------------|-------------------|
| Scenario 1 |                  |                   |                |                   |                   |
| 2010       | 0 [ $\pm 6$ ]    | 0 [ $\pm 12$ ]    | 0 [ $\pm 2$ ]  | 0 [ $\pm 6$ ]     | 0 [ $\pm 15$ ]    |
| 2020       | 35 [ $\pm 20$ ]  | 118 [ $\pm 39$ ]  | 2 [ $\pm 5$ ]  | 174 [ $\pm 19$ ]  | 309 [ $\pm 48$ ]  |
| 2030       | 62 [ $\pm 28$ ]  | 327 [ $\pm 54$ ]  | 9 [ $\pm 8$ ]  | 358 [ $\pm 28$ ]  | 492 [ $\pm 66$ ]  |
| Scenario 2 |                  |                   |                |                   |                   |
| 2010       | 0 [ $\pm 6$ ]    | -1 [ $\pm 12$ ]   | -1 [ $\pm 2$ ] | 5 [ $\pm 6$ ]     | -6 [ $\pm 15$ ]   |
| 2020       | 83 [ $\pm 20$ ]  | 537 [ $\pm 38$ ]  | 10 [ $\pm 5$ ] | 525 [ $\pm 19$ ]  | 880 [ $\pm 47$ ]  |
| 2030       | 164 [ $\pm 28$ ] | 1128 [ $\pm 54$ ] | 27 [ $\pm 8$ ] | 1054 [ $\pm 27$ ] | 1489 [ $\pm 66$ ] |

**Table A63. Prevalence cases in year [per 100000] for France**

| Year       | Cancers    | CHD & Stroke | Osteoarthritis | Diabetes   | Hypertension |
|------------|------------|--------------|----------------|------------|--------------|
| Scenario 0 |            |              |                |            |              |
| 2010       | 3932 [±18] | 2481 [±14]   | 404 [±6]       | 3798 [±17] | 51131 [±64]  |
| 2020       | 4111 [±18] | 3091 [±16]   | 402 [±6]       | 3632 [±17] | 53004 [±66]  |
| 2030       | 4267 [±19] | 3386 [±17]   | 424 [±6]       | 4006 [±18] | 54421 [±67]  |
| Scenario 1 |            |              |                |            |              |
| 2010       | 3948 [±18] | 2489 [±14]   | 406 [±6]       | 3821 [±17] | 51165 [±64]  |
| 2020       | 4116 [±18] | 3063 [±16]   | 402 [±6]       | 3514 [±17] | 52787 [±65]  |
| 2030       | 4260 [±19] | 3333 [±17]   | 420 [±6]       | 3807 [±18] | 54116 [±67]  |
| Scenario 2 |            |              |                |            |              |
| 2010       | 3942 [±18] | 2470 [±14]   | 406 [±6]       | 3808 [±17] | 51163 [±64]  |
| 2020       | 4091 [±18] | 2951 [±15]   | 401 [±6]       | 3286 [±16] | 52363 [±65]  |
| 2030       | 4252 [±19] | 3216 [±16]   | 414 [±6]       | 3437 [±17] | 53481 [±66]  |

**Table A64. Prevalence cases avoided in year [per 100000] France**

| Year       | Cancers  | CHD & Stroke | Osteoarthritis | Diabetes  | Hypertension |
|------------|----------|--------------|----------------|-----------|--------------|
| Scenario 1 |          |              |                |           |              |
| 2010       | 0 [±25]  | 0 [±20]      | 0 [±8]         | 0 [±25]   | 0 [±90]      |
| 2020       | 0 [±26]  | 28 [±22]     | 0 [±8]         | 118 [±24] | 217 [±92]    |
| 2030       | 7 [±26]  | 53 [±23]     | 4 [±8]         | 199 [±25] | 305 [±93]    |
| Scenario 2 |          |              |                |           |              |
| 2010       | 0 [±25]  | 11 [±20]     | 0 [±8]         | 0 [±25]   | 0 [±90]      |
| 2020       | 20 [±26] | 140 [±22]    | 1 [±8]         | 346 [±24] | 641 [±92]    |
| 2030       | 15 [±26] | 170 [±23]    | 10 [±8]        | 569 [±24] | 940 [±93]    |

## Georgia

**Table A65. Cumulative incidence cases from year 2010 [per 100000 of population in 2010] for Georgia**

| Year       | Cancers    | CHD & Stroke | Osteoarthritis | Diabetes   | Hypertension |
|------------|------------|--------------|----------------|------------|--------------|
| Scenario 0 |            |              |                |            |              |
| 2010       | 153 [±3]   | 1097 [±9]    | 23 [±1]        | 271 [±5]   | 751 [±8]     |
| 2020       | 1636 [±11] | 9618 [±27]   | 254 [±4]       | 3489 [±16] | 8603 [±25]   |
| 2030       | 3151 [±15] | 17714 [±36]  | 490 [±6]       | 7336 [±23] | 16531 [±35]  |
| Scenario 1 |            |              |                |            |              |
| 2010       | 151 [±3]   | 1109 [±9]    | 23 [±1]        | 269 [±5]   | 742 [±8]     |
| 2020       | 1593 [±11] | 9340 [±26]   | 245 [±4]       | 3076 [±15] | 8183 [±25]   |
| 2030       | 3066 [±15] | 17136 [±35]  | 474 [±6]       | 6680 [±22] | 15890 [±34]  |
| Scenario 2 |            |              |                |            |              |
| 2010       | 154 [±4]   | 1103 [±9]    | 24 [±1]        | 267 [±5]   | 747 [±8]     |
| 2020       | 1551 [±11] | 8802 [±26]   | 235 [±4]       | 2585 [±14] | 7632 [±24]   |
| 2030       | 2965 [±15] | 16146 [±34]  | 456 [±6]       | 5652 [±20] | 14868 [±33]  |

**Table A66. Cumulative incidence cases avoided from year 2010 [per 100000 of population in 2010] for Georgia**

| Year       | Cancers   | CHD & Stroke | Osteoarthritis | Diabetes   | Hypertension |
|------------|-----------|--------------|----------------|------------|--------------|
| Scenario 1 |           |              |                |            |              |
| 2010       | 2 [±5]    | -12 [±13]    | 0 [±2]         | 2 [±7]     | 9 [±11]      |
| 2020       | 43 [±16]  | 278 [±39]    | 9 [±6]         | 413 [±23]  | 420 [±37]    |
| 2030       | 85 [±22]  | 578 [±53]    | 16 [±9]        | 656 [±33]  | 641 [±51]    |
| Scenario 2 |           |              |                |            |              |
| 2010       | -1 [±5]   | -6 [±13]     | -1 [±2]        | 4 [±7]     | 4 [±11]      |
| 2020       | 85 [±16]  | 816 [±38]    | 19 [±6]        | 904 [±22]  | 971 [±36]    |
| 2030       | 186 [±22] | 1568 [±52]   | 34 [±9]        | 1684 [±32] | 1663 [±50]   |

**Table A67. Prevalence cases in year [per 100000] for Georgia**

| Year       | Cancers    | CHD & Stroke | Osteoarthritis | Diabetes   | Hypertension |
|------------|------------|--------------|----------------|------------|--------------|
| Scenario 0 |            |              |                |            |              |
| 2010       | 1102 [±9]  | 1589 [±11]   | 580 [±7]       | 7073 [±24] | 18900 [±39]  |
| 2020       | 1203 [±9]  | 1905 [±12]   | 526 [±6]       | 6279 [±22] | 18204 [±37]  |
| 2030       | 1275 [±10] | 2042 [±12]   | 528 [±6]       | 7123 [±23] | 18758 [±37]  |
| Scenario 1 |            |              |                |            |              |
| 2010       | 1099 [±9]  | 1601 [±11]   | 580 [±7]       | 7097 [±24] | 18902 [±39]  |
| 2020       | 1178 [±9]  | 1844 [±12]   | 519 [±6]       | 5976 [±21] | 17893 [±37]  |
| 2030       | 1235 [±9]  | 1958 [±12]   | 519 [±6]       | 6727 [±22] | 18396 [±36]  |
| Scenario 2 |            |              |                |            |              |
| 2010       | 1107 [±9]  | 1596 [±11]   | 573 [±7]       | 7064 [±24] | 18899 [±39]  |
| 2020       | 1163 [±9]  | 1746 [±11]   | 510 [±6]       | 5652 [±21] | 17547 [±36]  |
| 2030       | 1207 [±9]  | 1860 [±12]   | 508 [±6]       | 6064 [±21] | 17840 [±36]  |

**Table A68. Prevalence cases avoided in year [per 100000] for Georgia**

| Year       | Cancers  | CHD & Stroke | Osteoarthritis | Diabetes   | Hypertension |
|------------|----------|--------------|----------------|------------|--------------|
| Scenario 1 |          |              |                |            |              |
| 2010       | 3 [±13]  | -12 [±16]    | 0 [±10]        | -24 [±34]  | -2 [±55]     |
| 2020       | 25 [±14] | 61 [±17]     | 7 [±9]         | 303 [±31]  | 311 [±54]    |
| 2030       | 40 [±14] | 84 [±18]     | 9 [±9]         | 396 [±33]  | 362 [±55]    |
| Scenario 2 |          |              |                |            |              |
| 2010       | -5 [±13] | -7 [±16]     | 7 [±10]        | 9 [±34]    | 1 [±55]      |
| 2020       | 40 [±14] | 159 [±17]    | 16 [±9]        | 627 [±31]  | 657 [±53]    |
| 2030       | 68 [±14] | 182 [±18]    | 20 [±9]        | 1059 [±32] | 918 [±54]    |

## Germany

**Table A69. Cumulative incidence cases from year 2010 [per 100000 of population in 2010] for Germany**

| Year       | Cancers    | CHD & Stroke | Hypertension | Diabetes   | Osteoarthritis |
|------------|------------|--------------|--------------|------------|----------------|
| Scenario 0 |            |              |              |            |                |
| 2010       | 254 [±5]   | 916 [±9]     | 735 [±8]     | 231 [±4]   | 17 [±1]        |
| 2020       | 3231 [±17] | 11095 [±32]  | 9247 [±29]   | 3227 [±17] | 223 [±5]       |
| 2030       | 7460 [±29] | 25401 [±53]  | 20832 [±48]  | 7816 [±30] | 508 [±8]       |
| Scenario 1 |            |              |              |            |                |
| 2010       | 255 [±5]   | 911 [±9]     | 732 [±8]     | 234 [±4]   | 18 [±1]        |
| 2020       | 3191 [±17] | 10956 [±32]  | 8919 [±29]   | 3022 [±17] | 221 [±5]       |
| 2030       | 7353 [±29] | 25011 [±53]  | 20191 [±48]  | 7361 [±29] | 500 [±7]       |
| Scenario 2 |            |              |              |            |                |
| 2010       | 256 [±5]   | 911 [±9]     | 735 [±8]     | 236 [±4]   | 18 [±1]        |
| 2020       | 3098 [±17] | 10563 [±31]  | 8341 [±28]   | 2568 [±15] | 212 [±4]       |
| 2030       | 7129 [±28] | 24034 [±52]  | 18736 [±46]  | 6285 [±26] | 479 [±7]       |

**Table A70. Cumulative incidence cases avoided from year 2010 [per 100000 of population in 2010] Germany**

| Year       | Cancers   | CHD & Stroke | Hypertension | Diabetes   | Osteoarthritis |
|------------|-----------|--------------|--------------|------------|----------------|
| Scenario 1 |           |              |              |            |                |
| 2010       | 0 [±6]    | 5 [±12]      | 3 [±11]      | 0 [±6]     | 0 [±2]         |
| 2020       | 40 [±23]  | 139 [±42]    | 328 [±38]    | 205 [±22]  | 2 [±6]         |
| 2030       | 107 [±34] | 390 [±64]    | 641 [±57]    | 455 [±35]  | 8 [±9]         |
| Scenario 2 |           |              |              |            |                |
| 2010       | -2 [±6]   | 5 [±12]      | 0 [±11]      | -5 [±6]    | -1 [±2]        |
| 2020       | 133 [±23] | 532 [±42]    | 906 [±38]    | 659 [±22]  | 11 [±6]        |
| 2030       | 331 [±34] | 1367 [±63]   | 2096 [±56]   | 1531 [±34] | 29 [±9]        |



**Table A71. Prevalence cases in year [per 100000] for Germany**

| Year       | Cancers    | CHD & Stroke | Hypertension | Diabetes   | Osteoarthritis |
|------------|------------|--------------|--------------|------------|----------------|
| Scenario 0 |            |              |              |            |                |
| 2010       | 2470 [±14] | 2000 [±13]   | 18474 [±38]  | 3470 [±17] | 448 [±6]       |
| 2020       | 3075 [±17] | 2910 [±16]   | 22003 [±45]  | 3698 [±19] | 497 [±7]       |
| 2030       | 3715 [±20] | 3678 [±20]   | 25940 [±54]  | 4599 [±23] | 581 [±8]       |
| Scenario 1 |            |              |              |            |                |
| 2010       | 2456 [±14] | 2000 [±13]   | 18501 [±38]  | 3483 [±17] | 449 [±6]       |
| 2020       | 3039 [±17] | 2884 [±16]   | 21756 [±45]  | 3574 [±18] | 494 [±7]       |
| 2030       | 3677 [±20] | 3637 [±20]   | 25526 [±54]  | 4395 [±22] | 576 [±8]       |
| Scenario 2 |            |              |              |            |                |
| 2010       | 2471 [±14] | 1994 [±13]   | 18482 [±38]  | 3486 [±17] | 449 [±6]       |
| 2020       | 3000 [±17] | 2834 [±16]   | 21322 [±45]  | 3313 [±18] | 492 [±7]       |
| 2030       | 3616 [±20] | 3551 [±20]   | 24573 [±52]  | 3922 [±21] | 568 [±8]       |

**Table A72. Prevalence cases avoided in year [per 100000] Germany**

| Year       | Cancers  | CHD & Stroke | Hypertension | Diabetes  | Osteoarthritis |
|------------|----------|--------------|--------------|-----------|----------------|
| Scenario 1 |          |              |              |           |                |
| 2010       | 14 [±20] | 0 [±18]      | 0 [±54]      | 0 [±24]   | 0 [±8]         |
| 2020       | 36 [±22] | 26 [±22]     | 247 [±59]    | 124 [±24] | 3 [±9]         |
| 2030       | 38 [±24] | 41 [±24]     | 414 [±64]    | 204 [±27] | 5 [±10]        |
| Scenario 2 |          |              |              |           |                |
| 2010       | 0 [±20]  | 6 [±18]      | 0 [±54]      | -16 [±24] | 0 [±8]         |
| 2020       | 75 [±22] | 76 [±21]     | 681 [±59]    | 385 [±24] | 5 [±9]         |
| 2030       | 99 [±24] | 127 [±24]    | 1367 [±64]   | 677 [±26] | 13 [±10]       |

## Greece

**Table A73. Cumulative incidence cases from year 2010 [per 100000 of population in 2010] for Greece**

| Year       | Cancers           | CHD & Stroke       | Diabetes          | Osteoarthritis  | Hypertension       |
|------------|-------------------|--------------------|-------------------|-----------------|--------------------|
| Scenario 0 |                   |                    |                   |                 |                    |
| 2010       | 126 [ $\pm 3$ ]   | 949 [ $\pm 9$ ]    | 299 [ $\pm 5$ ]   | 19 [ $\pm 1$ ]  | 717 [ $\pm 8$ ]    |
| 2020       | 1428 [ $\pm 11$ ] | 10931 [ $\pm 30$ ] | 3280 [ $\pm 16$ ] | 195 [ $\pm 4$ ] | 7819 [ $\pm 25$ ]  |
| 2030       | 2963 [ $\pm 16$ ] | 22627 [ $\pm 45$ ] | 6463 [ $\pm 24$ ] | 388 [ $\pm 6$ ] | 15138 [ $\pm 36$ ] |
| Scenario 1 |                   |                    |                   |                 |                    |
| 2010       | 126 [ $\pm 3$ ]   | 950 [ $\pm 9$ ]    | 297 [ $\pm 5$ ]   | 18 [ $\pm 1$ ]  | 719 [ $\pm 8$ ]    |
| 2020       | 1414 [ $\pm 11$ ] | 10745 [ $\pm 30$ ] | 3095 [ $\pm 16$ ] | 191 [ $\pm 4$ ] | 7632 [ $\pm 25$ ]  |
| 2030       | 2939 [ $\pm 16$ ] | 22276 [ $\pm 44$ ] | 6093 [ $\pm 23$ ] | 382 [ $\pm 6$ ] | 14756 [ $\pm 36$ ] |
| Scenario 2 |                   |                    |                   |                 |                    |
| 2010       | 126 [ $\pm 3$ ]   | 959 [ $\pm 9$ ]    | 297 [ $\pm 5$ ]   | 17 [ $\pm 1$ ]  | 707 [ $\pm 8$ ]    |
| 2020       | 1372 [ $\pm 11$ ] | 10273 [ $\pm 29$ ] | 2562 [ $\pm 15$ ] | 181 [ $\pm 4$ ] | 7048 [ $\pm 24$ ]  |
| 2030       | 2849 [ $\pm 16$ ] | 21221 [ $\pm 43$ ] | 5040 [ $\pm 21$ ] | 362 [ $\pm 6$ ] | 13537 [ $\pm 34$ ] |

**Table A74. Cumulative incidence cases avoided from year 2010 [per 100000 of population in 2010] Greece**

| Year       | Cancers          | CHD & Stroke      | Diabetes          | Osteoarthritis | Hypertension      |
|------------|------------------|-------------------|-------------------|----------------|-------------------|
| Scenario 1 |                  |                   |                   |                |                   |
| 2010       | 0 [ $\pm 4$ ]    | -1 [ $\pm 12$ ]   | 2 [ $\pm 7$ ]     | 1 [ $\pm 2$ ]  | -2 [ $\pm 11$ ]   |
| 2020       | 14 [ $\pm 15$ ]  | 186 [ $\pm 42$ ]  | 185 [ $\pm 23$ ]  | 4 [ $\pm 6$ ]  | 187 [ $\pm 35$ ]  |
| 2030       | 24 [ $\pm 22$ ]  | 351 [ $\pm 60$ ]  | 370 [ $\pm 32$ ]  | 6 [ $\pm 8$ ]  | 382 [ $\pm 49$ ]  |
| Scenario 2 |                  |                   |                   |                |                   |
| 2010       | 0 [ $\pm 4$ ]    | -10 [ $\pm 12$ ]  | 2 [ $\pm 7$ ]     | 2 [ $\pm 2$ ]  | 10 [ $\pm 11$ ]   |
| 2020       | 56 [ $\pm 15$ ]  | 658 [ $\pm 41$ ]  | 718 [ $\pm 22$ ]  | 14 [ $\pm 5$ ] | 771 [ $\pm 34$ ]  |
| 2030       | 114 [ $\pm 22$ ] | 1406 [ $\pm 59$ ] | 1423 [ $\pm 30$ ] | 26 [ $\pm 8$ ] | 1601 [ $\pm 48$ ] |

**Table A75. Prevalence cases in year [per 100000] for Greece**

| Year       | Cancers    | CHD & Stroke | Diabetes   | Osteoarthritis | Hypertension |
|------------|------------|--------------|------------|----------------|--------------|
| Scenario 0 |            |              |            |                |              |
| 2010       | 1190 [±10] | 9256 [±27]   | 6262 [±22] | 422 [±6]       | 17636 [±38]  |
| 2020       | 1350 [±11] | 9998 [±29]   | 6913 [±24] | 449 [±6]       | 19669 [±40]  |
| 2030       | 1499 [±11] | 11292 [±31]  | 7373 [±25] | 482 [±7]       | 21197 [±43]  |
| Scenario 1 |            |              |            |                |              |
| 2010       | 1192 [±10] | 9263 [±27]   | 6250 [±22] | 418 [±6]       | 17646 [±38]  |
| 2020       | 1348 [±11] | 9930 [±29]   | 6763 [±24] | 443 [±6]       | 19531 [±40]  |
| 2030       | 1491 [±11] | 11169 [±31]  | 7112 [±25] | 476 [±6]       | 20904 [±43]  |
| Scenario 2 |            |              |            |                |              |
| 2010       | 1201 [±10] | 9255 [±27]   | 6237 [±22] | 413 [±6]       | 17635 [±38]  |
| 2020       | 1331 [±10] | 9656 [±28]   | 6326 [±23] | 437 [±6]       | 19038 [±40]  |
| 2030       | 1475 [±11] | 10751 [±31]  | 6404 [±24] | 469 [±6]       | 19972 [±42]  |

**Table A76. Prevalence cases avoided in year [per 100000] Greece**

| Year       | Cancers   | CHD & Stroke | Diabetes  | Osteoarthritis | Hypertension |
|------------|-----------|--------------|-----------|----------------|--------------|
| Scenario 1 |           |              |           |                |              |
| 2010       | -2 [±14]  | -7 [±38]     | 12 [±32]  | 4 [±8]         | -10 [±53]    |
| 2020       | 2 [±15]   | 68 [±40]     | 150 [±33] | 6 [±8]         | 138 [±56]    |
| 2030       | 8 [±15]   | 123 [±42]    | 261 [±34] | 6 [±9]         | 293 [±58]    |
| Scenario 2 |           |              |           |                |              |
| 2010       | -11 [±14] | 1 [±38]      | 25 [±32]  | 9 [±8]         | 1 [±53]      |
| 2020       | 19 [±15]  | 342 [±40]    | 587 [±33] | 12 [±8]        | 631 [±56]    |
| 2030       | 24 [±15]  | 541 [±42]    | 969 [±33] | 13 [±9]        | 1225 [±57]   |

## Hungary

**Table A77. Cumulative Incidence cases in year [per 100,000 of population in 2010] for Hungary**

| Year       | Cancers           | CHD & Stroke       | Osteoarthritis  | Diabetes          | Hypertension       |
|------------|-------------------|--------------------|-----------------|-------------------|--------------------|
| Scenario 0 |                   |                    |                 |                   |                    |
| 2010       | 237 [ $\pm 4$ ]   | 1685 [ $\pm 12$ ]  | 18 [ $\pm 1$ ]  | 225 [ $\pm 4$ ]   | 706 [ $\pm 8$ ]    |
| 2020       | 2573 [ $\pm 15$ ] | 15174 [ $\pm 37$ ] | 205 [ $\pm 4$ ] | 2519 [ $\pm 15$ ] | 8023 [ $\pm 27$ ]  |
| 2030       | 5126 [ $\pm 22$ ] | 28877 [ $\pm 53$ ] | 407 [ $\pm 6$ ] | 5011 [ $\pm 22$ ] | 16029 [ $\pm 40$ ] |
| Scenario 1 |                   |                    |                 |                   |                    |
| 2010       | 236 [ $\pm 4$ ]   | 1698 [ $\pm 12$ ]  | 18 [ $\pm 1$ ]  | 228 [ $\pm 4$ ]   | 707 [ $\pm 8$ ]    |
| 2020       | 2543 [ $\pm 15$ ] | 15035 [ $\pm 36$ ] | 200 [ $\pm 4$ ] | 2389 [ $\pm 15$ ] | 7817 [ $\pm 26$ ]  |
| 2030       | 5056 [ $\pm 22$ ] | 28528 [ $\pm 53$ ] | 398 [ $\pm 6$ ] | 4690 [ $\pm 21$ ] | 15616 [ $\pm 39$ ] |
| Scenario 2 |                   |                    |                 |                   |                    |
| 2010       | 235 [ $\pm 4$ ]   | 1684 [ $\pm 12$ ]  | 18 [ $\pm 1$ ]  | 230 [ $\pm 4$ ]   | 714 [ $\pm 8$ ]    |
| 2020       | 2460 [ $\pm 15$ ] | 14355 [ $\pm 36$ ] | 186 [ $\pm 4$ ] | 1961 [ $\pm 13$ ] | 7235 [ $\pm 25$ ]  |
| 2030       | 4917 [ $\pm 22$ ] | 27265 [ $\pm 51$ ] | 368 [ $\pm 6$ ] | 3842 [ $\pm 19$ ] | 14358 [ $\pm 37$ ] |

**Table A78. Cumulative incidence cases avoided from year 2010 [per 100000 of population in 2010] Hungary**

| Year       | Cancers          | CHD & Stroke      | Osteoarthritis | Diabetes          | Hypertension      |
|------------|------------------|-------------------|----------------|-------------------|-------------------|
| Scenario 1 |                  |                   |                |                   |                   |
| 2010       | 1 [ $\pm 6$ ]    | -13 [ $\pm 16$ ]  | 0 [ $\pm 2$ ]  | -3 [ $\pm 6$ ]    | -1 [ $\pm 11$ ]   |
| 2020       | 30 [ $\pm 20$ ]  | 139 [ $\pm 49$ ]  | 5 [ $\pm 6$ ]  | 130 [ $\pm 20$ ]  | 206 [ $\pm 36$ ]  |
| 2030       | 70 [ $\pm 29$ ]  | 349 [ $\pm 68$ ]  | 9 [ $\pm 8$ ]  | 321 [ $\pm 28$ ]  | 413 [ $\pm 50$ ]  |
| Scenario 2 |                  |                   |                |                   |                   |
| 2010       | 2 [ $\pm 6$ ]    | 1 [ $\pm 16$ ]    | 0 [ $\pm 2$ ]  | -5 [ $\pm 6$ ]    | -8 [ $\pm 11$ ]   |
| 2020       | 113 [ $\pm 20$ ] | 819 [ $\pm 49$ ]  | 19 [ $\pm 6$ ] | 558 [ $\pm 19$ ]  | 788 [ $\pm 35$ ]  |
| 2030       | 209 [ $\pm 28$ ] | 1612 [ $\pm 67$ ] | 39 [ $\pm 8$ ] | 1169 [ $\pm 27$ ] | 1671 [ $\pm 49$ ] |

**Table A79. Prevalence cases from year 2010 [per 100,000] for Hungary**

| Year       | Cancers    | CHD & Stroke | Osteoarthritis | Diabetes   | Hypertension |
|------------|------------|--------------|----------------|------------|--------------|
| Scenario 0 |            |              |                |            |              |
| 2010       | 1417 [±11] | 3477 [±17]   | 401 [±6]       | 6077 [±22] | 16584 [±36]  |
| 2020       | 1465 [±11] | 3433 [±17]   | 361 [±6]       | 5182 [±21] | 16272 [±38]  |
| 2030       | 1517 [±12] | 3453 [±18]   | 366 [±6]       | 5187 [±23] | 16708 [±40]  |
| Scenario 1 |            |              |                |            |              |
| 2010       | 1406 [±11] | 3483 [±17]   | 399 [±6]       | 6076 [±22] | 16594 [±36]  |
| 2020       | 1447 [±11] | 3406 [±17]   | 357 [±6]       | 5099 [±21] | 16131 [±38]  |
| 2030       | 1497 [±12] | 3414 [±18]   | 361 [±6]       | 4982 [±22] | 16466 [±40]  |
| Scenario 2 |            |              |                |            |              |
| 2010       | 1411 [±11] | 3474 [±17]   | 392 [±6]       | 6074 [±22] | 16610 [±36]  |
| 2020       | 1425 [±11] | 3307 [±17]   | 345 [±6]       | 4833 [±21] | 15803 [±37]  |
| 2030       | 1473 [±12] | 3319 [±18]   | 343 [±6]       | 4503 [±21] | 15757 [±39]  |

**Table A80. Prevalence cases avoided in year [per 100,000] Hungary**

| Year       | Cancers  | CHD & Stroke | Osteoarthritis | Diabetes  | Hypertension |
|------------|----------|--------------|----------------|-----------|--------------|
| Scenario 1 |          |              |                |           |              |
| 2010       | 11 [±15] | -6 [±24]     | 2 [±8]         | 1 [±31]   | -10 [±52]    |
| 2020       | 18 [±15] | 27 [±23]     | 4 [±8]         | 83 [±29]  | 141 [±51]    |
| 2030       | 20 [±16] | 39 [±23]     | 5 [±8]         | 205 [±29] | 242 [±52]    |
| Scenario 2 |          |              |                |           |              |
| 2010       | 6 [±15]  | 3 [±24]      | 9 [±8]         | 3 [±31]   | -26 [±52]    |
| 2020       | 40 [±15] | 126 [±23]    | 16 [±8]        | 349 [±28] | 469 [±51]    |
| 2030       | 44 [±15] | 134 [±23]    | 23 [±8]        | 684 [±28] | 951 [±51]    |

## Iceland

**Table A81. Cumulative incidence cases from year 2010 [per 100000 of population in 2010] for Iceland**

| Year       | Cancers    | CHD & Stroke | Osteoarthritis | Diabetes   | Hypertension |
|------------|------------|--------------|----------------|------------|--------------|
| Scenario 0 |            |              |                |            |              |
| 2010       | 188 [±4]   | 477 [±6]     | 221 [±4]       | 247 [±4]   | 642 [±7]     |
| 2020       | 2179 [±13] | 5779 [±21]   | 2606 [±14]     | 2958 [±15] | 7255 [±23]   |
| 2030       | 4365 [±18] | 12239 [±30]  | 5240 [±19]     | 6155 [±21] | 14491 [±32]  |
| Scenario 1 |            |              |                |            |              |
| 2010       | 185 [±4]   | 473 [±6]     | 214 [±4]       | 251 [±4]   | 645 [±7]     |
| 2020       | 2147 [±13] | 5656 [±21]   | 2545 [±14]     | 2722 [±14] | 6961 [±23]   |
| 2030       | 4292 [±18] | 11964 [±29]  | 5126 [±19]     | 5647 [±20] | 13905 [±32]  |
| Scenario 2 |            |              |                |            |              |
| 2010       | 188 [±4]   | 484 [±6]     | 220 [±4]       | 250 [±4]   | 651 [±7]     |
| 2020       | 2090 [±12] | 5384 [±20]   | 2392 [±13]     | 2268 [±13] | 6446 [±22]   |
| 2030       | 4143 [±17] | 11306 [±28]  | 4858 [±19]     | 4771 [±18] | 12925 [±30]  |

**Table A82. Cumulative incidence cases avoided from year 2010 [per 100000 of population in 2010] for Iceland**

| Year       | Cancers   | CHD & Stroke | Osteoarthritis | Diabetes   | Hypertension |
|------------|-----------|--------------|----------------|------------|--------------|
| Scenario 1 |           |              |                |            |              |
| 2010       | 3 [±5]    | 4 [±9]       | 7 [±6]         | -4 [±6]    | -3 [±10]     |
| 2020       | 32 [±19]  | 123 [±30]    | 61 [±20]       | 236 [±21]  | 294 [±34]    |
| 2030       | 73 [±26]  | 275 [±44]    | 114 [±29]      | 508 [±31]  | 586 [±48]    |
| Scenario 2 |           |              |                |            |              |
| 2010       | 0 [±5]    | -7 [±9]      | 1 [±6]         | -3 [±6]    | -9 [±10]     |
| 2020       | 89 [±18]  | 395 [±30]    | 214 [±20]      | 690 [±20]  | 809 [±33]    |
| 2030       | 222 [±26] | 933 [±43]    | 382 [±28]      | 1384 [±30] | 1566 [±47]   |

**Table A83. Prevalence cases in year [per 100000] for Iceland**

| Year       | Cancers    | CHD & Stroke | Osteoarthritis | Diabetes   | Hypertension |
|------------|------------|--------------|----------------|------------|--------------|
| Scenario 0 |            |              |                |            |              |
| 2010       | 2301 [±14] | 3481 [±17]   | 4478 [±19]     | 4954 [±20] | 13289 [±33]  |
| 2020       | 2628 [±14] | 4620 [±19]   | 5201 [±20]     | 6395 [±22] | 16250 [±35]  |
| 2030       | 2873 [±14] | 5770 [±20]   | 5992 [±21]     | 7794 [±24] | 18871 [±37]  |
| Scenario 1 |            |              |                |            |              |
| 2010       | 2292 [±14] | 3487 [±17]   | 4505 [±19]     | 4950 [±20] | 13279 [±33]  |
| 2020       | 2599 [±14] | 4538 [±18]   | 5174 [±20]     | 6177 [±21] | 15967 [±35]  |
| 2030       | 2842 [±14] | 5636 [±20]   | 5934 [±21]     | 7361 [±23] | 18382 [±36]  |
| Scenario 2 |            |              |                |            |              |
| 2010       | 2293 [±14] | 3482 [±17]   | 4484 [±19]     | 4975 [±20] | 13299 [±33]  |
| 2020       | 2578 [±14] | 4337 [±18]   | 5026 [±19]     | 5787 [±21] | 15525 [±34]  |
| 2030       | 2795 [±14] | 5279 [±19]   | 5735 [±20]     | 6658 [±22] | 17618 [±35]  |

**Table A84. Prevalence cases avoided in year [per 100000] for Iceland**

| Year       | Cancers  | CHD & Stroke | Osteoarthritis | Diabetes   | Hypertension |
|------------|----------|--------------|----------------|------------|--------------|
| Scenario 1 |          |              |                |            |              |
| 2010       | 9 [±19]  | -6 [±24]     | -27 [±27]      | 4 [±28]    | 10 [±46]     |
| 2020       | 29 [±20] | 82 [±27]     | 27 [±29]       | 218 [±32]  | 283 [±51]    |
| 2030       | 31 [±21] | 134 [±30]    | 58 [±31]       | 433 [±35]  | 489 [±55]    |
| Scenario 2 |          |              |                |            |              |
| 2010       | 8 [±19]  | -1 [±24]     | -6 [±27]       | -21 [±28]  | -10 [±46]    |
| 2020       | 50 [±20] | 283 [±27]    | 175 [±29]      | 608 [±31]  | 725 [±50]    |
| 2030       | 78 [±21] | 491 [±30]    | 257 [±31]      | 1136 [±34] | 1253 [±54]   |

## Ireland

**Table A85. Cumulative incidence cases from year 2010 [per 100000 of population in 2010] for Ireland**

| Year       | Cancers           | CHD & Stroke       | Osteoarthritis   | Diabetes          | Hypertension       |
|------------|-------------------|--------------------|------------------|-------------------|--------------------|
| Scenario 0 |                   |                    |                  |                   |                    |
| 2010       | 252 [ $\pm 4$ ]   | 525 [ $\pm 6$ ]    | 42 [ $\pm 2$ ]   | 137 [ $\pm 3$ ]   | 913 [ $\pm 9$ ]    |
| 2020       | 3038 [ $\pm 15$ ] | 5913 [ $\pm 21$ ]  | 508 [ $\pm 6$ ]  | 1650 [ $\pm 11$ ] | 10638 [ $\pm 29$ ] |
| 2030       | 6450 [ $\pm 22$ ] | 12134 [ $\pm 31$ ] | 1041 [ $\pm 9$ ] | 3568 [ $\pm 17$ ] | 21499 [ $\pm 41$ ] |
| Scenario 1 |                   |                    |                  |                   |                    |
| 2010       | 254 [ $\pm 5$ ]   | 521 [ $\pm 6$ ]    | 43 [ $\pm 2$ ]   | 134 [ $\pm 3$ ]   | 916 [ $\pm 9$ ]    |
| 2020       | 2948 [ $\pm 15$ ] | 5801 [ $\pm 21$ ]  | 499 [ $\pm 6$ ]  | 1535 [ $\pm 11$ ] | 10199 [ $\pm 28$ ] |
| 2030       | 6291 [ $\pm 22$ ] | 11893 [ $\pm 30$ ] | 1021 [ $\pm 9$ ] | 3324 [ $\pm 16$ ] | 20675 [ $\pm 40$ ] |
| Scenario 2 |                   |                    |                  |                   |                    |
| 2010       | 249 [ $\pm 4$ ]   | 524 [ $\pm 6$ ]    | 44 [ $\pm 2$ ]   | 139 [ $\pm 3$ ]   | 916 [ $\pm 9$ ]    |
| 2020       | 2803 [ $\pm 15$ ] | 5534 [ $\pm 21$ ]  | 466 [ $\pm 6$ ]  | 1268 [ $\pm 10$ ] | 9499 [ $\pm 27$ ]  |
| 2030       | 5997 [ $\pm 21$ ] | 11329 [ $\pm 29$ ] | 957 [ $\pm 9$ ]  | 2745 [ $\pm 14$ ] | 19360 [ $\pm 38$ ] |

**Table A86. Cumulative incidence cases avoided from year 2010 [per 100000 of population in 2010] Ireland**

| Year       | Cancers          | CHD & Stroke     | Osteoarthritis  | Diabetes         | Hypertension      |
|------------|------------------|------------------|-----------------|------------------|-------------------|
| Scenario 1 |                  |                  |                 |                  |                   |
| 2010       | -2 [ $\pm 6$ ]   | 4 [ $\pm 9$ ]    | -1 [ $\pm 3$ ]  | 3 [ $\pm 5$ ]    | -3 [ $\pm 12$ ]   |
| 2020       | 90 [ $\pm 22$ ]  | 112 [ $\pm 31$ ] | 9 [ $\pm 9$ ]   | 115 [ $\pm 16$ ] | 439 [ $\pm 41$ ]  |
| 2030       | 159 [ $\pm 32$ ] | 241 [ $\pm 44$ ] | 20 [ $\pm 13$ ] | 244 [ $\pm 23$ ] | 824 [ $\pm 58$ ]  |
| Scenario 2 |                  |                  |                 |                  |                   |
| 2010       | 3 [ $\pm 6$ ]    | 1 [ $\pm 9$ ]    | -2 [ $\pm 3$ ]  | -2 [ $\pm 5$ ]   | -3 [ $\pm 12$ ]   |
| 2020       | 235 [ $\pm 22$ ] | 379 [ $\pm 30$ ] | 42 [ $\pm 9$ ]  | 382 [ $\pm 15$ ] | 1139 [ $\pm 40$ ] |
| 2030       | 453 [ $\pm 32$ ] | 805 [ $\pm 43$ ] | 84 [ $\pm 13$ ] | 823 [ $\pm 22$ ] | 2139 [ $\pm 57$ ] |



**Table A87. Prevalence cases in year [per 100000] for Ireland**

| Year       | Cancers    | CHD & Stroke | Osteoarthritis | Diabetes   | Hypertension |
|------------|------------|--------------|----------------|------------|--------------|
| Scenario 0 |            |              |                |            |              |
| 2010       | 1346 [±10] | 770 [±8]     | 873 [±8]       | 2742 [±15] | 21728 [±42]  |
| 2020       | 1798 [±12] | 1300 [±10]   | 962 [±9]       | 2845 [±15] | 24392 [±43]  |
| 2030       | 2173 [±13] | 1519 [±11]   | 1083 [±9]      | 3327 [±16] | 27156 [±46]  |
| Scenario 1 |            |              |                |            |              |
| 2010       | 1356 [±10] | 765 [±8]     | 874 [±8]       | 2738 [±15] | 21742 [±42]  |
| 2020       | 1767 [±12] | 1280 [±10]   | 958 [±9]       | 2752 [±15] | 24048 [±43]  |
| 2030       | 2142 [±13] | 1495 [±11]   | 1076 [±9]      | 3150 [±16] | 26566 [±45]  |
| Scenario 2 |            |              |                |            |              |
| 2010       | 1350 [±10] | 763 [±8]     | 873 [±8]       | 2752 [±15] | 21740 [±42]  |
| 2020       | 1705 [±11] | 1220 [±10]   | 932 [±8]       | 2547 [±14] | 23511 [±42]  |
| 2030       | 2079 [±13] | 1428 [±10]   | 1035 [±9]      | 2744 [±14] | 25706 [±44]  |

**Table A88. Prevalence cases avoided in year [per 100000] Ireland**

| Year       | Cancers   | CHD & Stroke | Osteoarthritis | Diabetes  | Hypertension |
|------------|-----------|--------------|----------------|-----------|--------------|
| Scenario 1 |           |              |                |           |              |
| 2010       | -10 [±15] | 5 [±11]      | -1 [±12]       | 4 [±21]   | -14 [±59]    |
| 2020       | 31 [±17]  | 20 [±14]     | 4 [±12]        | 93 [±21]  | 344 [±62]    |
| 2030       | 31 [±19]  | 24 [±16]     | 7 [±13]        | 177 [±23] | 590 [±66]    |
| Scenario 2 |           |              |                |           |              |
| 2010       | -4 [±15]  | 7 [±11]      | 0 [±12]        | -10 [±21] | -12 [±59]    |
| 2020       | 93 [±17]  | 80 [±14]     | 30 [±12]       | 298 [±21] | 881 [±62]    |
| 2030       | 94 [±18]  | 91 [±15]     | 48 [±13]       | 583 [±22] | 1450 [±65]   |

## Israel

**Table A89. Cumulative incidence cases from year 2010 [per 100000 of population in 2010] for Israel**

| Year       | Cancers    | CHD & Stroke | Osteoarthritis | Diabetes   | Hypertension |
|------------|------------|--------------|----------------|------------|--------------|
| Scenario 0 |            |              |                |            |              |
| 2010       | 191 [±4]   | 668 [±7]     | 12 [±1]        | 214 [±4]   | 547 [±7]     |
| 2020       | 2013 [±12] | 6272 [±21]   | 127 [±3]       | 2017 [±12] | 5508 [±20]   |
| 2030       | 3668 [±16] | 10879 [±27]  | 229 [±4]       | 3600 [±16] | 10131 [±26]  |
| Scenario 1 |            |              |                |            |              |
| 2010       | 192 [±4]   | 670 [±7]     | 11 [±1]        | 213 [±4]   | 547 [±7]     |
| 2020       | 1997 [±12] | 6223 [±21]   | 126 [±3]       | 1912 [±12] | 5463 [±20]   |
| 2030       | 3643 [±16] | 10737 [±27]  | 225 [±4]       | 3395 [±15] | 10032 [±26]  |
| Scenario 2 |            |              |                |            |              |
| 2010       | 190 [±4]   | 666 [±7]     | 12 [±1]        | 214 [±4]   | 544 [±7]     |
| 2020       | 1950 [±12] | 5887 [±21]   | 120 [±3]       | 1627 [±11] | 5314 [±20]   |
| 2030       | 3553 [±15] | 10174 [±26]  | 214 [±4]       | 2890 [±14] | 9769 [±26]   |

**Table A90. Cumulative incidence cases avoided from year 2010 [per 100000 of population in 2010] for Israel**

| Year       | Cancers   | CHD & Stroke | Diabetes  | Hypertension | Osteoarthritis |
|------------|-----------|--------------|-----------|--------------|----------------|
| Scenario 1 |           |              |           |              |                |
| 2010       | -1 [±6]   | -2 [±10]     | 1 [±6]    | 0 [±9]       | 1 [±1]         |
| 2020       | 16 [±18]  | 49 [±32]     | 105 [±18] | 45 [±30]     | 1 [±4]         |
| 2030       | 25 [±24]  | 142 [±42]    | 205 [±24] | 99 [±40]     | 4 [±6]         |
| Scenario 2 |           |              |           |              |                |
| 2010       | 1 [±6]    | 2 [±10]      | 0 [±6]    | 3 [±9]       | 0 [±1]         |
| 2020       | 63 [±18]  | 385 [±31]    | 390 [±17] | 194 [±29]    | 7 [±4]         |
| 2030       | 115 [±24] | 705 [±41]    | 710 [±23] | 362 [±40]    | 15 [±6]        |

**Table A91. Prevalence cases in year [per 100000] for Israel**

| Year       | Cancers    | CHD & Stroke | Osteoarthritis | Diabetes   | Hypertension |
|------------|------------|--------------|----------------|------------|--------------|
| Scenario 0 |            |              |                |            |              |
| 2010       | 1597 [±11] | 1900 [±12]   | 278 [±5]       | 4189 [±18] | 11908 [±31]  |
| 2020       | 1728 [±11] | 2143 [±13]   | 261 [±4]       | 3601 [±16] | 11767 [±29]  |
| 2030       | 1751 [±11] | 2085 [±12]   | 260 [±4]       | 3410 [±15] | 11832 [±28]  |
| Scenario 1 |            |              |                |            |              |
| 2010       | 1602 [±11] | 1903 [±12]   | 278 [±5]       | 4205 [±18] | 11902 [±31]  |
| 2020       | 1725 [±11] | 2136 [±13]   | 259 [±4]       | 3536 [±16] | 11719 [±29]  |
| 2030       | 1744 [±11] | 2049 [±12]   | 256 [±4]       | 3275 [±15] | 11774 [±28]  |
| Scenario 2 |            |              |                |            |              |
| 2010       | 1607 [±11] | 1894 [±12]   | 275 [±5]       | 4183 [±18] | 11855 [±31]  |
| 2020       | 1706 [±11] | 2044 [±12]   | 254 [±4]       | 3335 [±16] | 11655 [±29]  |
| 2030       | 1733 [±11] | 1971 [±11]   | 252 [±4]       | 2984 [±14] | 11699 [±28]  |

**Table A92. Prevalence cases avoided in year [per 100000] for Israel**

| Year       | Cancers  | CHD & Stroke | Diabetes  | Hypertension | Osteoarthritis |
|------------|----------|--------------|-----------|--------------|----------------|
| Scenario 1 |          |              |           |              |                |
| 2010       | 5 [±16]  | -1 [±11]     | -9 [±27]  | -5 [±44]     | -4 [±7]        |
| 2020       | 14 [±17] | 8 [±13]      | 67 [±24]  | 54 [±44]     | -2 [±6]        |
| 2030       | 11 [±17] | 18 [±12]     | 139 [±24] | 68 [±44]     | 1 [±7]         |
| Scenario 2 |          |              |           |              |                |
| 2010       | 7 [±16]  | -6 [±11]     | -10 [±27] | 40 [±44]     | -3 [±7]        |
| 2020       | 29 [±17] | 68 [±12]     | 262 [±24] | 139 [±44]    | 6 [±6]         |
| 2030       | 19 [±17] | 78 [±12]     | 442 [±23] | 155 [±44]    | 13 [±6]        |

## Italy

**Table A93. Cumulative incidence cases from year 2010 [per 100000 of population in 2010] for Italy**

| Year       | Cancers    | CHD & Stroke | Diabetes   | Osteoarthritis | Hypertension |
|------------|------------|--------------|------------|----------------|--------------|
| Scenario 0 |            |              |            |                |              |
| 2010       | 246 [±4]   | 1095 [±9]    | 236 [±4]   | 17 [±1]        | 746 [±8]     |
| 2020       | 2869 [±16] | 11269 [±31]  | 2733 [±15] | 202 [±4]       | 8253 [±27]   |
| 2030       | 5919 [±24] | 22213 [±46]  | 5518 [±23] | 410 [±6]       | 16310 [±39]  |
| Scenario 1 |            |              |            |                |              |
| 2010       | 246 [±4]   | 1097 [±9]    | 237 [±4]   | 18 [±1]        | 748 [±8]     |
| 2020       | 2845 [±16] | 11119 [±31]  | 2550 [±15] | 196 [±4]       | 8047 [±26]   |
| 2030       | 5861 [±23] | 21865 [±45]  | 5142 [±22] | 398 [±6]       | 15836 [±38]  |
| Scenario 2 |            |              |            |                |              |
| 2010       | 245 [±4]   | 1091 [±9]    | 235 [±4]   | 18 [±1]        | 743 [±8]     |
| 2020       | 2748 [±15] | 10644 [±30]  | 2099 [±13] | 187 [±4]       | 7405 [±25]   |
| 2030       | 5651 [±23] | 20873 [±44]  | 4222 [±20] | 376 [±6]       | 14479 [±37]  |

**Table A94. Cumulative incidence cases avoided from year 2010 [per 100000 of population in 2010] Italy**

| Year       | Cancers   | CHD & Stroke | Diabetes   | Osteoarthritis | Hypertension |
|------------|-----------|--------------|------------|----------------|--------------|
| Scenario 1 |           |              |            |                |              |
| 2010       | 0 [±6]    | -2 [±13]     | -1 [±6]    | -1 [±2]        | -2 [±11]     |
| 2020       | 24 [±21]  | 150 [±42]    | 183 [±21]  | 6 [±6]         | 206 [±36]    |
| 2030       | 58 [±31]  | 348 [±59]    | 376 [±29]  | 12 [±8]        | 474 [±51]    |
| Scenario 2 |           |              |            |                |              |
| 2010       | 1 [±6]    | 4 [±13]      | 1 [±6]     | -1 [±2]        | 3 [±11]      |
| 2020       | 121 [±21] | 625 [±42]    | 634 [±20]  | 15 [±6]        | 848 [±35]    |
| 2030       | 268 [±30] | 1340 [±59]   | 1296 [±28] | 34 [±8]        | 1831 [±50]   |

**Table A95. Prevalence cases in year [per 100000] for Italy**

| Year       | Cancers    | CHD & Stroke | Diabetes   | Osteoarthritis | Hypertension |
|------------|------------|--------------|------------|----------------|--------------|
| Scenario 0 |            |              |            |                |              |
| 2010       | 2560 [±14] | 2885 [±15]   | 5845 [±22] | 447 [±6]       | 18448 [±38]  |
| 2020       | 2830 [±16] | 3417 [±17]   | 5791 [±22] | 450 [±6]       | 19563 [±41]  |
| 2030       | 3043 [±17] | 3728 [±19]   | 6040 [±24] | 472 [±7]       | 20547 [±44]  |
| Scenario 1 |            |              |            |                |              |
| 2010       | 2569 [±14] | 2877 [±15]   | 5828 [±22] | 450 [±6]       | 18441 [±38]  |
| 2020       | 2806 [±16] | 3372 [±17]   | 5640 [±22] | 442 [±6]       | 19409 [±41]  |
| 2030       | 3011 [±17] | 3663 [±18]   | 5772 [±23] | 462 [±7]       | 20218 [±43]  |
| Scenario 2 |            |              |            |                |              |
| 2010       | 2560 [±14] | 2877 [±15]   | 5853 [±22] | 455 [±6]       | 18432 [±38]  |
| 2020       | 2767 [±15] | 3286 [±17]   | 5343 [±21] | 438 [±6]       | 18960 [±40]  |
| 2030       | 2966 [±17] | 3529 [±18]   | 5211 [±22] | 453 [±6]       | 19354 [±42]  |

**Table A96. Prevalence cases avoided in year [per 100000] Italy**

| Year       | Cancers  | CHD & Stroke | Diabetes  | Osteoarthritis | Hypertension |
|------------|----------|--------------|-----------|----------------|--------------|
| Scenario 1 |          |              |           |                |              |
| 2010       | -9 [±20] | 8 [±21]      | 17 [±31]  | -3 [±8]        | 7 [±54]      |
| 2020       | 24 [±21] | 45 [±23]     | 151 [±30] | 8 [±8]         | 154 [±56]    |
| 2030       | 32 [±22] | 65 [±24]     | 268 [±31] | 10 [±9]        | 329 [±57]    |
| Scenario 2 |          |              |           |                |              |
| 2010       | 0 [±20]  | 8 [±21]      | -8 [±31]  | -8 [±8]        | 16 [±54]     |
| 2020       | 63 [±21] | 131 [±23]    | 448 [±30] | 12 [±8]        | 603 [±56]    |
| 2030       | 77 [±22] | 199 [±24]    | 829 [±30] | 19 [±9]        | 1193 [±56]   |

## Kazakhstan

**Table A97. Cumulative incidence cases from year 2010 [per 100000 of population in 2010] for Kazakhstan**

| Year       | Cancers           | CHD & Stroke       | Osteoarthritis  | Diabetes          | Hypertension       |
|------------|-------------------|--------------------|-----------------|-------------------|--------------------|
| Scenario 0 |                   |                    |                 |                   |                    |
| 2010       | 101 [ $\pm 3$ ]   | 2532 [ $\pm 14$ ]  | 12 [ $\pm 1$ ]  | 257 [ $\pm 5$ ]   | 667 [ $\pm 7$ ]    |
| 2020       | 1044 [ $\pm 9$ ]  | 18107 [ $\pm 38$ ] | 132 [ $\pm 3$ ] | 2965 [ $\pm 15$ ] | 6710 [ $\pm 23$ ]  |
| 2030       | 1986 [ $\pm 13$ ] | 31143 [ $\pm 50$ ] | 246 [ $\pm 4$ ] | 6231 [ $\pm 22$ ] | 13355 [ $\pm 33$ ] |
| Scenario 1 |                   |                    |                 |                   |                    |
| 2010       | 99 [ $\pm 3$ ]    | 2527 [ $\pm 14$ ]  | 11 [ $\pm 1$ ]  | 261 [ $\pm 5$ ]   | 675 [ $\pm 7$ ]    |
| 2020       | 1039 [ $\pm 9$ ]  | 17899 [ $\pm 38$ ] | 128 [ $\pm 3$ ] | 2782 [ $\pm 15$ ] | 6503 [ $\pm 23$ ]  |
| 2030       | 1972 [ $\pm 13$ ] | 30782 [ $\pm 50$ ] | 242 [ $\pm 4$ ] | 5910 [ $\pm 22$ ] | 12847 [ $\pm 32$ ] |
| Scenario 2 |                   |                    |                 |                   |                    |
| 2010       | 100 [ $\pm 3$ ]   | 2528 [ $\pm 14$ ]  | 13 [ $\pm 1$ ]  | 257 [ $\pm 5$ ]   | 670 [ $\pm 7$ ]    |
| 2020       | 998 [ $\pm 9$ ]   | 17434 [ $\pm 37$ ] | 121 [ $\pm 3$ ] | 2409 [ $\pm 14$ ] | 5827 [ $\pm 22$ ]  |
| 2030       | 1896 [ $\pm 12$ ] | 29971 [ $\pm 49$ ] | 232 [ $\pm 4$ ] | 5057 [ $\pm 20$ ] | 11505 [ $\pm 30$ ] |

**Table A98. Cumulative incidence cases avoided from year 2010 [per 100000 of population in 2010] for Kazakhstan**

| Year       | Cancers         | CHD & Stroke      | Osteoarthritis | Diabetes          | Hypertension      |
|------------|-----------------|-------------------|----------------|-------------------|-------------------|
| Scenario 1 |                 |                   |                |                   |                   |
| 2010       | 2 [ $\pm 4$ ]   | 5 [ $\pm 20$ ]    | 1 [ $\pm 1$ ]  | -4 [ $\pm 6$ ]    | -8 [ $\pm 10$ ]   |
| 2020       | 5 [ $\pm 13$ ]  | 208 [ $\pm 54$ ]  | 4 [ $\pm 5$ ]  | 183 [ $\pm 21$ ]  | 207 [ $\pm 33$ ]  |
| 2030       | 14 [ $\pm 18$ ] | 361 [ $\pm 70$ ]  | 4 [ $\pm 6$ ]  | 321 [ $\pm 31$ ]  | 508 [ $\pm 46$ ]  |
| Scenario 2 |                 |                   |                |                   |                   |
| 2010       | 1 [ $\pm 4$ ]   | 4 [ $\pm 20$ ]    | -1 [ $\pm 1$ ] | 0 [ $\pm 6$ ]     | -3 [ $\pm 10$ ]   |
| 2020       | 46 [ $\pm 13$ ] | 673 [ $\pm 53$ ]  | 11 [ $\pm 4$ ] | 556 [ $\pm 21$ ]  | 883 [ $\pm 32$ ]  |
| 2030       | 90 [ $\pm 18$ ] | 1172 [ $\pm 70$ ] | 14 [ $\pm 6$ ] | 1174 [ $\pm 30$ ] | 1850 [ $\pm 45$ ] |

**Table A99. Prevalence cases in year [per 100000] for Kazakhstan**

| Year       | Cancers  | CHD & Stroke | Osteoarthritis | Diabetes   | Hypertension |
|------------|----------|--------------|----------------|------------|--------------|
| Scenario 0 |          |              |                |            |              |
| 2010       | 402 [±6] | 6484 [±23]   | 243 [±4]       | 4527 [±19] | 11972 [±31]  |
| 2020       | 437 [±6] | 6014 [±22]   | 199 [±4]       | 4820 [±20] | 12084 [±31]  |
| 2030       | 462 [±6] | 6021 [±22]   | 201 [±4]       | 5810 [±22] | 13681 [±33]  |
| Scenario 1 |          |              |                |            |              |
| 2010       | 397 [±6] | 6469 [±23]   | 247 [±4]       | 4535 [±19] | 11947 [±31]  |
| 2020       | 437 [±6] | 5970 [±22]   | 197 [±4]       | 4687 [±19] | 11924 [±31]  |
| 2030       | 463 [±6] | 5987 [±22]   | 200 [±4]       | 5643 [±21] | 13384 [±33]  |
| Scenario 2 |          |              |                |            |              |
| 2010       | 404 [±6] | 6476 [±23]   | 244 [±4]       | 4538 [±19] | 12007 [±31]  |
| 2020       | 425 [±6] | 5859 [±22]   | 193 [±4]       | 4423 [±19] | 11525 [±30]  |
| 2030       | 448 [±6] | 5877 [±22]   | 194 [±4]       | 5069 [±20] | 12606 [±32]  |

**Table A100. Prevalence cases avoided in year [per 100000] for Kazakhstan**

| Year       | Cancers | CHD & Stroke | Osteoarthritis | Diabetes  | Hypertension |
|------------|---------|--------------|----------------|-----------|--------------|
| Scenario 1 |         |              |                |           |              |
| 2010       | 5 [±8]  | 15 [±32]     | -4 [±6]        | -8 [±27]  | 25 [±44]     |
| 2020       | 0 [±8]  | 44 [±31]     | 2 [±6]         | 133 [±28] | 160 [±44]    |
| 2030       | -1 [±9] | 34 [±31]     | 1 [±6]         | 167 [±30] | 297 [±47]    |
| Scenario 2 |         |              |                |           |              |
| 2010       | -2 [±8] | 8 [±32]      | -1 [±6]        | -11 [±27] | -35 [±44]    |
| 2020       | 12 [±8] | 155 [±31]    | 6 [±6]         | 397 [±27] | 559 [±43]    |
| 2030       | 14 [±9] | 144 [±31]    | 7 [±6]         | 741 [±30] | 1075 [±46]   |

## Kyrgyzstan

**Table A101. Cumulative incidence cases from year 2010 [per 100000 of population in 2010] for Kyrgyzstan**

| Year       | Cancers   | CHD & Stroke | Osteoarthritis | Diabetes   | Hypertension |
|------------|-----------|--------------|----------------|------------|--------------|
| Scenario 0 |           |              |                |            |              |
| 2010       | 66 [±2]   | 1637 [±11]   | 9 [±1]         | 212 [±4]   | 411 [±6]     |
| 2020       | 656 [±7]  | 12239 [±30]  | 101 [±3]       | 2258 [±13] | 4426 [±18]   |
| 2030       | 1214 [±9] | 20914 [±38]  | 190 [±4]       | 4037 [±17] | 8387 [±24]   |
| Scenario 1 |           |              |                |            |              |
| 2010       | 62 [±2]   | 1640 [±11]   | 9 [±1]         | 209 [±4]   | 409 [±6]     |
| 2020       | 644 [±7]  | 12117 [±30]  | 98 [±3]        | 2148 [±13] | 4331 [±18]   |
| 2030       | 1194 [±9] | 20708 [±37]  | 186 [±4]       | 3867 [±16] | 8252 [±24]   |
| Scenario 2 |           |              |                |            |              |
| 2010       | 64 [±2]   | 1643 [±11]   | 9 [±1]         | 209 [±4]   | 413 [±6]     |
| 2020       | 636 [±7]  | 11863 [±30]  | 95 [±3]        | 1910 [±12] | 4141 [±17]   |
| 2030       | 1175 [±9] | 20300 [±37]  | 176 [±3]       | 3409 [±15] | 7855 [±23]   |

**Table A102. Cumulative incidence cases avoided from year 2010 [per 100000 of population in 2010] for Kyrgyzstan**

| Year       | Cancers  | CHD & Stroke | Osteoarthritis | Diabetes  | Hypertension |
|------------|----------|--------------|----------------|-----------|--------------|
| Scenario 1 |          |              |                |           |              |
| 2010       | 0 [±3]   | 5 [±16]      | 0 [±1]         | 1 [±6]    | -4 [±8]      |
| 2020       | 4 [±10]  | 227 [±45]    | 2 [±4]         | 130 [±20] | 116 [±27]    |
| 2030       | 13 [±14] | 280 [±59]    | 3 [±6]         | 222 [±28] | 168 [±38]    |
| Scenario 2 |          |              |                |           |              |
| 2010       | -1 [±3]  | 12 [±16]     | 0 [±1]         | 1 [±6]    | -5 [±8]      |
| 2020       | 25 [±10] | 602 [±44]    | 7 [±4]         | 470 [±19] | 365 [±27]    |
| 2030       | 53 [±14] | 859 [±59]    | 13 [±6]        | 865 [±27] | 644 [±37]    |



**Table A103. Prevalence cases in year [per 100000] for Kyrgyzstan**

| Year       | Cancers  | CHD & Stroke | Osteoarthritis | Diabetes   | Hypertension |
|------------|----------|--------------|----------------|------------|--------------|
| Scenario 0 |          |              |                |            |              |
| 2010       | 304 [±5] | 4239 [±18]   | 175 [±4]       | 3479 [±17] | 9006 [±27]   |
| 2020       | 334 [±5] | 4522 [±18]   | 155 [±3]       | 3782 [±17] | 9483 [±26]   |
| 2030       | 353 [±5] | 4676 [±18]   | 166 [±3]       | 4029 [±17] | 10217 [±26]  |
| Scenario 1 |          |              |                |            |              |
| 2010       | 302 [±5] | 4255 [±18]   | 174 [±4]       | 3494 [±17] | 9005 [±27]   |
| 2020       | 333 [±5] | 4487 [±18]   | 153 [±3]       | 3705 [±17] | 9409 [±26]   |
| 2030       | 350 [±5] | 4656 [±18]   | 164 [±3]       | 3942 [±16] | 10145 [±26]  |
| Scenario 2 |          |              |                |            |              |
| 2010       | 298 [±5] | 4251 [±18]   | 169 [±4]       | 3504 [±17] | 9024 [±27]   |
| 2020       | 326 [±5] | 4427 [±18]   | 150 [±3]       | 3531 [±16] | 9290 [±26]   |
| 2030       | 349 [±5] | 4572 [±18]   | 155 [±3]       | 3647 [±16] | 9876 [±26]   |

**Table A104. Prevalence cases avoided in year [per 100000] for Kyrgyzstan**

| Year       | Cancers | CHD & Stroke | Osteoarthritis | Diabetes  | Hypertension |
|------------|---------|--------------|----------------|-----------|--------------|
| Scenario 1 |         |              |                |           |              |
| 2010       | 2 [±7]  | -16 [±26]    | 1 [±5]         | -15 [±24] | 1 [±38]      |
| 2020       | 1 [±7]  | 35 [±27]     | 2 [±5]         | 77 [±24]  | 74 [±39]     |
| 2030       | 3 [±7]  | 20 [±27]     | 2 [±5]         | 87 [±25]  | 72 [±40]     |
| Scenario 2 |         |              |                |           |              |
| 2010       | 6 [±7]  | -12 [±26]    | 6 [±5]         | -25 [±24] | -18 [±38]    |
| 2020       | 8 [±7]  | 95 [±27]     | 5 [±5]         | 251 [±24] | 193 [±39]    |
| 2030       | 4 [±7]  | 104 [±27]    | 11 [±5]        | 382 [±25] | 341 [±40]    |

## Latvia

**Table A105. Cumulative incidence cases from year 2010 [per 100,000 of population in 2010] for Latvia**

| Year       | Cancers           | CHD & Stroke       | Osteoarthritis  | Diabetes          | Hypertension       |
|------------|-------------------|--------------------|-----------------|-------------------|--------------------|
| Scenario 0 |                   |                    |                 |                   |                    |
| 2010       | 143 [ $\pm 3$ ]   | 1918 [ $\pm 12$ ]  | 16 [ $\pm 1$ ]  | 242 [ $\pm 4$ ]   | 656 [ $\pm 7$ ]    |
| 2020       | 1738 [ $\pm 13$ ] | 19994 [ $\pm 45$ ] | 199 [ $\pm 4$ ] | 3349 [ $\pm 18$ ] | 8959 [ $\pm 30$ ]  |
| 2030       | 3976 [ $\pm 23$ ] | 44170 [ $\pm 76$ ] | 460 [ $\pm 8$ ] | 7977 [ $\pm 32$ ] | 21728 [ $\pm 53$ ] |
| Scenario 1 |                   |                    |                 |                   |                    |
| 2010       | 142 [ $\pm 3$ ]   | 1917 [ $\pm 12$ ]  | 15 [ $\pm 1$ ]  | 243 [ $\pm 4$ ]   | 646 [ $\pm 7$ ]    |
| 2020       | 1703 [ $\pm 13$ ] | 19665 [ $\pm 45$ ] | 194 [ $\pm 4$ ] | 3084 [ $\pm 18$ ] | 8697 [ $\pm 30$ ]  |
| 2030       | 3900 [ $\pm 23$ ] | 43389 [ $\pm 75$ ] | 447 [ $\pm 8$ ] | 7355 [ $\pm 31$ ] | 21082 [ $\pm 52$ ] |
| Scenario 2 |                   |                    |                 |                   |                    |
| 2010       | 141 [ $\pm 3$ ]   | 1920 [ $\pm 12$ ]  | 15 [ $\pm 1$ ]  | 241 [ $\pm 4$ ]   | 649 [ $\pm 7$ ]    |
| 2020       | 1632 [ $\pm 13$ ] | 18814 [ $\pm 43$ ] | 178 [ $\pm 4$ ] | 2522 [ $\pm 16$ ] | 7987 [ $\pm 28$ ]  |
| 2030       | 3772 [ $\pm 22$ ] | 41434 [ $\pm 73$ ] | 413 [ $\pm 7$ ] | 6013 [ $\pm 28$ ] | 19291 [ $\pm 50$ ] |

**Table A106. Cumulative incidence cases avoided from year 2010 [per 100,000 of population in 2010] Latvia**

| Year       | Cancers          | CHD & Stroke      | Osteoarthritis | Diabetes          | Hypertension      |
|------------|------------------|-------------------|----------------|-------------------|-------------------|
| Scenario 1 |                  |                   |                |                   |                   |
| 2010       | 1 [ $\pm 5$ ]    | 1 [ $\pm 18$ ]    | 1 [ $\pm 2$ ]  | -1 [ $\pm 6$ ]    | 10 [ $\pm 10$ ]   |
| 2020       | 35 [ $\pm 17$ ]  | 329 [ $\pm 56$ ]  | 5 [ $\pm 6$ ]  | 265 [ $\pm 23$ ]  | 262 [ $\pm 38$ ]  |
| 2030       | 76 [ $\pm 25$ ]  | 781 [ $\pm 84$ ]  | 13 [ $\pm 9$ ] | 622 [ $\pm 35$ ]  | 646 [ $\pm 59$ ]  |
| Scenario 2 |                  |                   |                |                   |                   |
| 2010       | 2 [ $\pm 5$ ]    | -2 [ $\pm 18$ ]   | 1 [ $\pm 2$ ]  | 1 [ $\pm 6$ ]     | 7 [ $\pm 10$ ]    |
| 2020       | 106 [ $\pm 16$ ] | 1180 [ $\pm 56$ ] | 21 [ $\pm 5$ ] | 827 [ $\pm 22$ ]  | 972 [ $\pm 37$ ]  |
| 2030       | 204 [ $\pm 25$ ] | 2736 [ $\pm 83$ ] | 47 [ $\pm 8$ ] | 1964 [ $\pm 33$ ] | 2437 [ $\pm 57$ ] |

**Table A107. Prevalence cases in year [per 100,000] for Latvia**

| Year       | Cancers    | CHD & Stroke | Osteoarthritis | Diabetes   | Hypertension |
|------------|------------|--------------|----------------|------------|--------------|
| Scenario 0 |            |              |                |            |              |
| 2010       | 817 [±8]   | 3989 [±18]   | 310 [±5]       | 5910 [±22] | 14809 [±34]  |
| 2020       | 909 [±10]  | 4440 [±21]   | 306 [±6]       | 5858 [±24] | 16043 [±40]  |
| 2030       | 1064 [±12] | 5192 [±26]   | 354 [±7]       | 7129 [±31] | 19764 [±51]  |
| Scenario 1 |            |              |                |            |              |
| 2010       | 818 [±8]   | 3984 [±18]   | 313 [±5]       | 5909 [±22] | 14791 [±34]  |
| 2020       | 893 [±9]   | 4368 [±21]   | 304 [±6]       | 5670 [±24] | 15861 [±40]  |
| 2030       | 1054 [±12] | 5107 [±26]   | 350 [±7]       | 6729 [±30] | 19420 [±50]  |
| Scenario 2 |            |              |                |            |              |
| 2010       | 813 [±8]   | 3989 [±18]   | 309 [±5]       | 5910 [±22] | 14788 [±34]  |
| 2020       | 877 [±9]   | 4270 [±21]   | 293 [±5]       | 5305 [±23] | 15472 [±39]  |
| 2030       | 1041 [±12] | 4947 [±25]   | 336 [±7]       | 5954 [±28] | 18447 [±49]  |

**Table A108. Prevalence cases avoided in year [per 100,000] Latvia**

| Year       | Cancers  | CHD & Stroke | Osteoarthritis | Diabetes   | Hypertension |
|------------|----------|--------------|----------------|------------|--------------|
| Scenario 1 |          |              |                |            |              |
| 2010       | -1 [±11] | 5 [±25]      | -3 [±7]        | 1 [±31]    | 18 [±49]     |
| 2020       | 16 [±12] | 72 [±27]     | 2 [±7]         | 188 [±30]  | 182 [±51]    |
| 2030       | 10 [±13] | 85 [±29]     | 4 [±8]         | 400 [±33]  | 344 [±56]    |
| Scenario 2 |          |              |                |            |              |
| 2010       | 4 [±11]  | 0 [±25]      | 1 [±7]         | 0 [±31]    | 21 [±49]     |
| 2020       | 32 [±12] | 170 [±26]    | 13 [±7]        | 553 [±30]  | 571 [±50]    |
| 2030       | 23 [±13] | 245 [±28]    | 18 [±7]        | 1175 [±32] | 1317 [±55]   |

## Lithuania

**Table A109. Cumulative incidence cases from year 2010 [per 100000 of population in 2010] for Lithuania**

| Year       | Cancers           | CHD & Stroke       | Osteoarthritis  | Diabetes          | Hypertension       |
|------------|-------------------|--------------------|-----------------|-------------------|--------------------|
| Scenario 0 |                   |                    |                 |                   |                    |
| 2010       | 147 [ $\pm 3$ ]   | 588 [ $\pm 7$ ]    | 17 [ $\pm 1$ ]  | 239 [ $\pm 4$ ]   | 665 [ $\pm 7$ ]    |
| 2020       | 1718 [ $\pm 12$ ] | 6465 [ $\pm 23$ ]  | 196 [ $\pm 4$ ] | 2635 [ $\pm 15$ ] | 7481 [ $\pm 25$ ]  |
| 2030       | 3498 [ $\pm 18$ ] | 12873 [ $\pm 34$ ] | 394 [ $\pm 6$ ] | 4912 [ $\pm 21$ ] | 15020 [ $\pm 37$ ] |
| Scenario 1 |                   |                    |                 |                   |                    |
| 2010       | 151 [ $\pm 3$ ]   | 593 [ $\pm 7$ ]    | 16 [ $\pm 1$ ]  | 239 [ $\pm 4$ ]   | 657 [ $\pm 7$ ]    |
| 2020       | 1707 [ $\pm 12$ ] | 6420 [ $\pm 23$ ]  | 191 [ $\pm 4$ ] | 2489 [ $\pm 14$ ] | 7304 [ $\pm 25$ ]  |
| 2030       | 3469 [ $\pm 18$ ] | 12739 [ $\pm 34$ ] | 387 [ $\pm 6$ ] | 4625 [ $\pm 20$ ] | 14656 [ $\pm 36$ ] |
| Scenario 2 |                   |                    |                 |                   |                    |
| 2010       | 153 [ $\pm 3$ ]   | 585 [ $\pm 7$ ]    | 17 [ $\pm 1$ ]  | 244 [ $\pm 4$ ]   | 666 [ $\pm 7$ ]    |
| 2020       | 1655 [ $\pm 12$ ] | 6174 [ $\pm 23$ ]  | 177 [ $\pm 4$ ] | 2057 [ $\pm 13$ ] | 6770 [ $\pm 24$ ]  |
| 2030       | 3364 [ $\pm 17$ ] | 12217 [ $\pm 33$ ] | 361 [ $\pm 6$ ] | 3807 [ $\pm 19$ ] | 13481 [ $\pm 35$ ] |

**Table A110. Cumulative incidence cases avoided from year 2010 [per 100000 of population in 2010] Lithuania**

| Year       | Cancers          | CHD & Stroke     | Osteoarthritis | Diabetes          | Hypertension      |
|------------|------------------|------------------|----------------|-------------------|-------------------|
| Scenario 1 |                  |                  |                |                   |                   |
| 2010       | -4 [ $\pm 5$ ]   | -5 [ $\pm 10$ ]  | 1 [ $\pm 2$ ]  | 0 [ $\pm 6$ ]     | 8 [ $\pm 10$ ]    |
| 2020       | 11 [ $\pm 17$ ]  | 45 [ $\pm 32$ ]  | 5 [ $\pm 6$ ]  | 146 [ $\pm 20$ ]  | 177 [ $\pm 34$ ]  |
| 2030       | 29 [ $\pm 24$ ]  | 134 [ $\pm 45$ ] | 7 [ $\pm 8$ ]  | 287 [ $\pm 28$ ]  | 364 [ $\pm 49$ ]  |
| Scenario 2 |                  |                  |                |                   |                   |
| 2010       | -6 [ $\pm 5$ ]   | 3 [ $\pm 10$ ]   | 0 [ $\pm 2$ ]  | -5 [ $\pm 6$ ]    | -1 [ $\pm 10$ ]   |
| 2020       | 63 [ $\pm 16$ ]  | 291 [ $\pm 32$ ] | 19 [ $\pm 5$ ] | 578 [ $\pm 19$ ]  | 711 [ $\pm 34$ ]  |
| 2030       | 134 [ $\pm 23$ ] | 656 [ $\pm 45$ ] | 33 [ $\pm 8$ ] | 1105 [ $\pm 26$ ] | 1539 [ $\pm 48$ ] |

**Table A111. Prevalence cases in year [per 100000] for Lithuania**

| Year       | Cancers    | CHD & Stroke | Osteoarthritis | Diabetes   | Hypertension |
|------------|------------|--------------|----------------|------------|--------------|
| Scenario 0 |            |              |                |            |              |
| 2010       | 929 [±9]   | 1881 [±12]   | 374 [±5]       | 6588 [±23] | 16489 [±36]  |
| 2020       | 1108 [±10] | 2338 [±14]   | 389 [±6]       | 6692 [±24] | 17528 [±38]  |
| 2030       | 1195 [±10] | 2516 [±15]   | 406 [±6]       | 6530 [±24] | 18358 [±41]  |
| Scenario 1 |            |              |                |            |              |
| 2010       | 923 [±9]   | 1889 [±12]   | 374 [±5]       | 6591 [±23] | 16479 [±36]  |
| 2020       | 1093 [±10] | 2319 [±14]   | 382 [±6]       | 6579 [±24] | 17377 [±38]  |
| 2030       | 1177 [±10] | 2471 [±15]   | 401 [±6]       | 6328 [±24] | 18095 [±41]  |
| Scenario 2 |            |              |                |            |              |
| 2010       | 929 [±9]   | 1870 [±12]   | 374 [±5]       | 6560 [±23] | 16513 [±36]  |
| 2020       | 1076 [±10] | 2244 [±14]   | 374 [±6]       | 6213 [±23] | 16986 [±38]  |
| 2030       | 1152 [±10] | 2363 [±15]   | 389 [±6]       | 5751 [±23] | 17266 [±40]  |

**Table A112. Prevalence cases avoided in year [per 100000] Lithuania**

| Year       | Cancers  | CHD & Stroke | Osteoarthritis | Diabetes  | Hypertension |
|------------|----------|--------------|----------------|-----------|--------------|
| Scenario 1 |          |              |                |           |              |
| 2010       | 6 [±12]  | -8 [±17]     | 0 [±8]         | -3 [±32]  | 10 [±51]     |
| 2020       | 15 [±13] | 19 [±19]     | 7 [±8]         | 113 [±33] | 151 [±53]    |
| 2030       | 18 [±14] | 45 [±20]     | 5 [±8]         | 202 [±32] | 263 [±54]    |
| Scenario 2 |          |              |                |           |              |
| 2010       | 0 [±12]  | 11 [±17]     | 0 [±8]         | 28 [±32]  | -24 [±51]    |
| 2020       | 32 [±13] | 94 [±19]     | 15 [±8]        | 479 [±32] | 542 [±53]    |
| 2030       | 43 [±14] | 153 [±20]    | 17 [±8]        | 779 [±31] | 1092 [±53]   |

## Luxembourg

**Table A113. Cumulative incidence cases from year 2010 [per 100000 of population in 2010] for Luxembourg**

| Year       | Cancers           | CHD & Stroke       | Osteoarthritis  | Diabetes          | Hypertension       |
|------------|-------------------|--------------------|-----------------|-------------------|--------------------|
| Scenario 0 |                   |                    |                 |                   |                    |
| 2010       | 216 [ $\pm 4$ ]   | 687 [ $\pm 7$ ]    | 15 [ $\pm 1$ ]  | 130 [ $\pm 3$ ]   | 1166 [ $\pm 10$ ]  |
| 2020       | 2498 [ $\pm 14$ ] | 7826 [ $\pm 25$ ]  | 180 [ $\pm 4$ ] | 1578 [ $\pm 11$ ] | 12432 [ $\pm 32$ ] |
| 2030       | 5223 [ $\pm 21$ ] | 16397 [ $\pm 37$ ] | 368 [ $\pm 5$ ] | 3344 [ $\pm 17$ ] | 24431 [ $\pm 45$ ] |
| Scenario 1 |                   |                    |                 |                   |                    |
| 2010       | 211 [ $\pm 4$ ]   | 682 [ $\pm 7$ ]    | 16 [ $\pm 1$ ]  | 134 [ $\pm 3$ ]   | 1165 [ $\pm 10$ ]  |
| 2020       | 2452 [ $\pm 14$ ] | 7655 [ $\pm 25$ ]  | 178 [ $\pm 4$ ] | 1473 [ $\pm 11$ ] | 12066 [ $\pm 31$ ] |
| 2030       | 5129 [ $\pm 20$ ] | 16013 [ $\pm 36$ ] | 366 [ $\pm 5$ ] | 3118 [ $\pm 16$ ] | 23747 [ $\pm 44$ ] |
| Scenario 2 |                   |                    |                 |                   |                    |
| 2010       | 214 [ $\pm 4$ ]   | 686 [ $\pm 7$ ]    | 15 [ $\pm 1$ ]  | 131 [ $\pm 3$ ]   | 1155 [ $\pm 10$ ]  |
| 2020       | 2388 [ $\pm 14$ ] | 7308 [ $\pm 24$ ]  | 168 [ $\pm 4$ ] | 1211 [ $\pm 10$ ] | 11300 [ $\pm 30$ ] |
| 2030       | 4978 [ $\pm 20$ ] | 15270 [ $\pm 35$ ] | 344 [ $\pm 5$ ] | 2601 [ $\pm 15$ ] | 22311 [ $\pm 43$ ] |

**Table A114. Cumulative incidence cases avoided from year 2010 [per 100000 of population in 2010] Luxembourg**

| Year       | Cancers          | CHD & Stroke      | Osteoarthritis | Diabetes         | Hypertension      |
|------------|------------------|-------------------|----------------|------------------|-------------------|
| Scenario 1 |                  |                   |                |                  |                   |
| 2010       | 5 [ $\pm 6$ ]    | 5 [ $\pm 10$ ]    | 0 [ $\pm 2$ ]  | 0 [ $\pm 5$ ]    | 1 [ $\pm 14$ ]    |
| 2020       | 46 [ $\pm 20$ ]  | 171 [ $\pm 35$ ]  | 2 [ $\pm 5$ ]  | 105 [ $\pm 16$ ] | 366 [ $\pm 44$ ]  |
| 2030       | 94 [ $\pm 29$ ]  | 384 [ $\pm 51$ ]  | 2 [ $\pm 8$ ]  | 226 [ $\pm 23$ ] | 684 [ $\pm 62$ ]  |
| Scenario 2 |                  |                   |                |                  |                   |
| 2010       | 2 [ $\pm 6$ ]    | 1 [ $\pm 10$ ]    | 0 [ $\pm 2$ ]  | 0 [ $\pm 5$ ]    | 11 [ $\pm 14$ ]   |
| 2020       | 110 [ $\pm 20$ ] | 518 [ $\pm 35$ ]  | 12 [ $\pm 5$ ] | 367 [ $\pm 15$ ] | 1132 [ $\pm 44$ ] |
| 2030       | 245 [ $\pm 29$ ] | 1127 [ $\pm 50$ ] | 24 [ $\pm 8$ ] | 743 [ $\pm 22$ ] | 2120 [ $\pm 61$ ] |

**Table A115. Prevalence cases in year [per 100000] for Luxembourg**

| Year       | Cancers    | CHD & Stroke | Osteoarthritis | Diabetes   | Hypertension |
|------------|------------|--------------|----------------|------------|--------------|
| Scenario 0 |            |              |                |            |              |
| 2010       | 1996 [±13] | 2750 [±15]   | 353 [±5]       | 1773 [±12] | 28536 [±48]  |
| 2020       | 2345 [±14] | 3492 [±17]   | 386 [±6]       | 2091 [±13] | 31884 [±50]  |
| 2030       | 2648 [±15] | 4267 [±19]   | 429 [±6]       | 2492 [±14] | 34618 [±53]  |
| Scenario 1 |            |              |                |            |              |
| 2010       | 1999 [±13] | 2755 [±15]   | 350 [±5]       | 1777 [±12] | 28530 [±48]  |
| 2020       | 2315 [±14] | 3433 [±17]   | 378 [±5]       | 2012 [±13] | 31561 [±50]  |
| 2030       | 2619 [±15] | 4153 [±18]   | 428 [±6]       | 2348 [±14] | 34098 [±53]  |
| Scenario 2 |            |              |                |            |              |
| 2010       | 2005 [±13] | 2765 [±15]   | 347 [±5]       | 1778 [±12] | 28530 [±48]  |
| 2020       | 2286 [±14] | 3296 [±16]   | 371 [±5]       | 1823 [±12] | 30960 [±50]  |
| 2030       | 2582 [±15] | 3962 [±18]   | 413 [±6]       | 2059 [±13] | 33109 [±52]  |

**Table A116. Prevalence cases avoided in year [per 100000] Luxembourg**

| Year       | Cancers  | CHD & Stroke | Osteoarthritis | Diabetes  | Hypertension |
|------------|----------|--------------|----------------|-----------|--------------|
| Scenario 1 |          |              |                |           |              |
| 2010       | 0 [±18]  | 0 [±21]      | 3 [±7]         | 0 [±17]   | 6 [±68]      |
| 2020       | 30 [±19] | 59 [±24]     | 8 [±8]         | 79 [±18]  | 323 [±71]    |
| 2030       | 29 [±21] | 114 [±26]    | 1 [±8]         | 144 [±20] | 520 [±74]    |
| Scenario 2 |          |              |                |           |              |
| 2010       | 0 [±18]  | 0 [±21]      | 6 [±7]         | 0 [±17]   | 6 [±68]      |
| 2020       | 59 [±19] | 196 [±23]    | 15 [±8]        | 268 [±18] | 924 [±71]    |
| 2030       | 66 [±20] | 305 [±26]    | 16 [±8]        | 433 [±19] | 1509 [±74]   |

## Malta

**Table A117. Cumulative incidence cases from year 2010 [per 100000 of population in 2010] for Malta**

| Year       | Cancers           | CHD & Stroke       | Diabetes          | Osteoarthritis  | Hypertension       |
|------------|-------------------|--------------------|-------------------|-----------------|--------------------|
| Scenario 0 |                   |                    |                   |                 |                    |
| 2010       | 183 [ $\pm 4$ ]   | 726 [ $\pm 8$ ]    | 227 [ $\pm 4$ ]   | 17 [ $\pm 1$ ]  | 682 [ $\pm 7$ ]    |
| 2020       | 2157 [ $\pm 13$ ] | 8884 [ $\pm 27$ ]  | 2521 [ $\pm 14$ ] | 194 [ $\pm 4$ ] | 8078 [ $\pm 26$ ]  |
| 2030       | 4447 [ $\pm 20$ ] | 19356 [ $\pm 41$ ] | 5243 [ $\pm 21$ ] | 404 [ $\pm 6$ ] | 16937 [ $\pm 38$ ] |
| Scenario 1 |                   |                    |                   |                 |                    |
| 2010       | 180 [ $\pm 4$ ]   | 724 [ $\pm 8$ ]    | 225 [ $\pm 4$ ]   | 17 [ $\pm 1$ ]  | 691 [ $\pm 7$ ]    |
| 2020       | 2133 [ $\pm 13$ ] | 8696 [ $\pm 27$ ]  | 2369 [ $\pm 14$ ] | 191 [ $\pm 4$ ] | 7829 [ $\pm 25$ ]  |
| 2030       | 4401 [ $\pm 20$ ] | 19017 [ $\pm 41$ ] | 4929 [ $\pm 21$ ] | 397 [ $\pm 6$ ] | 16469 [ $\pm 38$ ] |
| Scenario 2 |                   |                    |                   |                 |                    |
| 2010       | 187 [ $\pm 4$ ]   | 729 [ $\pm 8$ ]    | 230 [ $\pm 4$ ]   | 17 [ $\pm 1$ ]  | 688 [ $\pm 7$ ]    |
| 2020       | 2066 [ $\pm 13$ ] | 8289 [ $\pm 26$ ]  | 1967 [ $\pm 13$ ] | 176 [ $\pm 4$ ] | 7192 [ $\pm 24$ ]  |
| 2030       | 4258 [ $\pm 19$ ] | 18103 [ $\pm 40$ ] | 4099 [ $\pm 19$ ] | 369 [ $\pm 6$ ] | 15208 [ $\pm 36$ ] |

**Table A118. Cumulative incidence cases avoided from year 2010 [per 100000 of population in 2010] Malta**

| Year       | Cancers          | CHD & Stroke      | Diabetes          | Osteoarthritis | Hypertension      |
|------------|------------------|-------------------|-------------------|----------------|-------------------|
| Scenario 1 |                  |                   |                   |                |                   |
| 2010       | 3 [ $\pm 5$ ]    | 2 [ $\pm 11$ ]    | 2 [ $\pm 6$ ]     | 0 [ $\pm 2$ ]  | -9 [ $\pm 10$ ]   |
| 2020       | 24 [ $\pm 19$ ]  | 188 [ $\pm 38$ ]  | 152 [ $\pm 20$ ]  | 3 [ $\pm 6$ ]  | 249 [ $\pm 36$ ]  |
| 2030       | 46 [ $\pm 27$ ]  | 339 [ $\pm 55$ ]  | 314 [ $\pm 29$ ]  | 7 [ $\pm 8$ ]  | 468 [ $\pm 52$ ]  |
| Scenario 2 |                  |                   |                   |                |                   |
| 2010       | -4 [ $\pm 5$ ]   | -3 [ $\pm 11$ ]   | -3 [ $\pm 6$ ]    | 0 [ $\pm 2$ ]  | -6 [ $\pm 10$ ]   |
| 2020       | 91 [ $\pm 18$ ]  | 595 [ $\pm 37$ ]  | 554 [ $\pm 19$ ]  | 18 [ $\pm 5$ ] | 886 [ $\pm 35$ ]  |
| 2030       | 189 [ $\pm 26$ ] | 1253 [ $\pm 55$ ] | 1144 [ $\pm 27$ ] | 35 [ $\pm 8$ ] | 1729 [ $\pm 51$ ] |



**Table A119. Prevalence cases in year [per 100000] for Malta**

| Year       | Cancers    | CHD & Stroke | Diabetes   | Osteoarthritis | Hypertension |
|------------|------------|--------------|------------|----------------|--------------|
| Scenario 0 |            |              |            |                |              |
| 2010       | 1490 [±11] | 3077 [±16]   | 6691 [±23] | 380 [±6]       | 15627 [±35]  |
| 2020       | 1831 [±12] | 4189 [±19]   | 7386 [±25] | 417 [±6]       | 18245 [±39]  |
| 2030       | 2000 [±13] | 4945 [±21]   | 7964 [±26] | 462 [±6]       | 20580 [±42]  |
| Scenario 1 |            |              |            |                |              |
| 2010       | 1490 [±11] | 3071 [±16]   | 6683 [±23] | 378 [±5]       | 15648 [±35]  |
| 2020       | 1820 [±12] | 4105 [±18]   | 7255 [±24] | 415 [±6]       | 18067 [±38]  |
| 2030       | 1977 [±13] | 4854 [±21]   | 7712 [±26] | 460 [±6]       | 20274 [±42]  |
| Scenario 2 |            |              |            |                |              |
| 2010       | 1496 [±11] | 3075 [±16]   | 6703 [±23] | 386 [±6]       | 15646 [±35]  |
| 2020       | 1783 [±12] | 3948 [±18]   | 6921 [±24] | 409 [±6]       | 17541 [±38]  |
| 2030       | 1925 [±13] | 4616 [±20]   | 7057 [±25] | 444 [±6]       | 19388 [±41]  |

**Table A120. Prevalence cases avoided in year [per 100000] Malta**

| Year       | Cancers  | CHD & Stroke | Diabetes  | Osteoarthritis | Hypertension |
|------------|----------|--------------|-----------|----------------|--------------|
| Scenario 1 |          |              |           |                |              |
| 2010       | 0 [±15]  | 6 [±22]      | 8 [±33]   | 2 [±8]         | -21 [±50]    |
| 2020       | 11 [±17] | 84 [±26]     | 131 [±34] | 2 [±8]         | 178 [±54]    |
| 2030       | 23 [±18] | 91 [±28]     | 252 [±35] | 2 [±9]         | 306 [±57]    |
| Scenario 2 |          |              |           |                |              |
| 2010       | -6 [±15] | 2 [±22]      | -12 [±33] | -6 [±8]        | -19 [±50]    |
| 2020       | 48 [±17] | 241 [±26]    | 465 [±34] | 8 [±8]         | 704 [±54]    |
| 2030       | 75 [±18] | 329 [±28]    | 907 [±35] | 18 [±9]        | 1192 [±57]   |

## Monaco

**Table A121. Cumulative incidence cases from year 2010 [per 100000 of population in 2010] for Monaco**

| Year       | Cancers           | CHD & Stroke       | Osteoarthritis  | Diabetes          | Hypertension       |
|------------|-------------------|--------------------|-----------------|-------------------|--------------------|
| Scenario 0 |                   |                    |                 |                   |                    |
| 2010       | 237 [ $\pm 4$ ]   | 1305 [ $\pm 10$ ]  | 18 [ $\pm 1$ ]  | 230 [ $\pm 4$ ]   | 1237 [ $\pm 10$ ]  |
| 2020       | 2797 [ $\pm 16$ ] | 13904 [ $\pm 35$ ] | 220 [ $\pm 4$ ] | 2894 [ $\pm 16$ ] | 13547 [ $\pm 35$ ] |
| 2030       | 5670 [ $\pm 24$ ] | 26778 [ $\pm 51$ ] | 452 [ $\pm 7$ ] | 6144 [ $\pm 24$ ] | 27373 [ $\pm 52$ ] |
| Scenario 1 |                   |                    |                 |                   |                    |
| 2010       | 238 [ $\pm 4$ ]   | 1307 [ $\pm 10$ ]  | 19 [ $\pm 1$ ]  | 231 [ $\pm 4$ ]   | 1227 [ $\pm 10$ ]  |
| 2020       | 2751 [ $\pm 16$ ] | 13677 [ $\pm 35$ ] | 219 [ $\pm 4$ ] | 2702 [ $\pm 15$ ] | 13247 [ $\pm 34$ ] |
| 2030       | 5576 [ $\pm 23$ ] | 26245 [ $\pm 51$ ] | 451 [ $\pm 7$ ] | 5724 [ $\pm 24$ ] | 26825 [ $\pm 51$ ] |
| Scenario 2 |                   |                    |                 |                   |                    |
| 2010       | 238 [ $\pm 4$ ]   | 1329 [ $\pm 10$ ]  | 18 [ $\pm 1$ ]  | 234 [ $\pm 4$ ]   | 1234 [ $\pm 10$ ]  |
| 2020       | 2705 [ $\pm 15$ ] | 13173 [ $\pm 34$ ] | 202 [ $\pm 4$ ] | 2291 [ $\pm 14$ ] | 12675 [ $\pm 34$ ] |
| 2030       | 5470 [ $\pm 23$ ] | 25220 [ $\pm 49$ ] | 416 [ $\pm 6$ ] | 4904 [ $\pm 22$ ] | 25828 [ $\pm 50$ ] |

**Table A122. Cumulative incidence cases avoided from year 2010 [per 100000 of population in 2010] for Monaco**

| Year       | Cancers          | CHD & Stroke      | Osteoarthritis | Diabetes          | Hypertension      |
|------------|------------------|-------------------|----------------|-------------------|-------------------|
| Scenario 1 |                  |                   |                |                   |                   |
| 2010       | -1 [ $\pm 6$ ]   | -2 [ $\pm 14$ ]   | -1 [ $\pm 2$ ] | -1 [ $\pm 6$ ]    | 10 [ $\pm 14$ ]   |
| 2020       | 46 [ $\pm 21$ ]  | 227 [ $\pm 47$ ]  | 1 [ $\pm 6$ ]  | 192 [ $\pm 21$ ]  | 300 [ $\pm 46$ ]  |
| 2030       | 94 [ $\pm 30$ ]  | 533 [ $\pm 65$ ]  | 1 [ $\pm 8$ ]  | 420 [ $\pm 31$ ]  | 548 [ $\pm 66$ ]  |
| Scenario 2 |                  |                   |                |                   |                   |
| 2010       | -1 [ $\pm 6$ ]   | -24 [ $\pm 15$ ]  | 0 [ $\pm 2$ ]  | -4 [ $\pm 6$ ]    | 3 [ $\pm 14$ ]    |
| 2020       | 92 [ $\pm 21$ ]  | 731 [ $\pm 47$ ]  | 18 [ $\pm 6$ ] | 603 [ $\pm 20$ ]  | 872 [ $\pm 46$ ]  |
| 2030       | 200 [ $\pm 30$ ] | 1558 [ $\pm 64$ ] | 36 [ $\pm 8$ ] | 1240 [ $\pm 30$ ] | 1545 [ $\pm 65$ ] |

**Table A123. Prevalence cases in year [per 100000] for Monaco**

| Year       | Cancers    | CHD & Stroke | Osteoarthritis | Diabetes   | Hypertension |
|------------|------------|--------------|----------------|------------|--------------|
| Scenario 0 |            |              |                |            |              |
| 2010       | 4555 [±19] | 3402 [±16]   | 491 [±6]       | 4987 [±20] | 57472 [±68]  |
| 2020       | 4490 [±20] | 4007 [±19]   | 458 [±6]       | 4358 [±20] | 57611 [±72]  |
| 2030       | 4506 [±21] | 4048 [±20]   | 460 [±7]       | 4560 [±21] | 57335 [±75]  |
| Scenario 1 |            |              |                |            |              |
| 2010       | 4557 [±19] | 3399 [±16]   | 495 [±6]       | 4978 [±20] | 57517 [±68]  |
| 2020       | 4475 [±20] | 3953 [±19]   | 461 [±6]       | 4220 [±19] | 57432 [±71]  |
| 2030       | 4496 [±21] | 3990 [±20]   | 467 [±7]       | 4350 [±21] | 57067 [±75]  |
| Scenario 2 |            |              |                |            |              |
| 2010       | 4556 [±19] | 3426 [±17]   | 497 [±6]       | 4990 [±20] | 57512 [±68]  |
| 2020       | 4478 [±20] | 3832 [±18]   | 451 [±6]       | 3976 [±19] | 57024 [±71]  |
| 2030       | 4489 [±21] | 3859 [±19]   | 445 [±7]       | 3954 [±20] | 56475 [±74]  |

**Table A124. Prevalence cases avoided in year [per 100000] for Monaco**

| Year       | Cancers  | CHD & Stroke | Osteoarthritis | Diabetes  | Hypertension |
|------------|----------|--------------|----------------|-----------|--------------|
| Scenario 1 |          |              |                |           |              |
| 2010       | -2 [±27] | 3 [±23]      | -4 [±9]        | 9 [±28]   | -45 [±96]    |
| 2020       | 15 [±27] | 54 [±25]     | -3 [±9]        | 138 [±26] | 179 [±96]    |
| 2030       | 10 [±27] | 58 [±25]     | -7 [±9]        | 210 [±27] | 268 [±96]    |
| Scenario 2 |          |              |                |           |              |
| 2010       | -1 [±27] | -24 [±23]    | -6 [±9]        | -3 [±28]  | -40 [±96]    |
| 2020       | 12 [±27] | 175 [±25]    | 7 [±9]         | 382 [±26] | 587 [±96]    |
| 2030       | 17 [±27] | 189 [±25]    | 15 [±9]        | 606 [±26] | 860 [±95]    |

## Montenegro

**Table A125. Cumulative incidence cases from year 2010 [per 100000 of population in 2010] for Montenegro**

| Year       | Cancers    | CHD & Stroke | Osteoarthritis | Diabetes   | Hypertension |
|------------|------------|--------------|----------------|------------|--------------|
| Scenario 0 |            |              |                |            |              |
| 2010       | 135 [±3]   | 732 [±8]     | 17 [±1]        | 213 [±4]   | 652 [±7]     |
| 2020       | 1487 [±11] | 7603 [±25]   | 169 [±4]       | 2356 [±14] | 7390 [±24]   |
| 2030       | 2928 [±16] | 14574 [±35]  | 330 [±5]       | 4541 [±19] | 14529 [±35]  |
| Scenario 1 |            |              |                |            |              |
| 2010       | 134 [±3]   | 733 [±8]     | 16 [±1]        | 212 [±4]   | 653 [±7]     |
| 2020       | 1473 [±11] | 7560 [±25]   | 167 [±4]       | 2204 [±13] | 7183 [±24]   |
| 2030       | 2896 [±16] | 14442 [±35]  | 323 [±5]       | 4212 [±19] | 14026 [±34]  |
| Scenario 2 |            |              |                |            |              |
| 2010       | 132 [±3]   | 736 [±8]     | 16 [±1]        | 214 [±4]   | 654 [±7]     |
| 2020       | 1427 [±11] | 7245 [±24]   | 158 [±4]       | 1858 [±12] | 6675 [±23]   |
| 2030       | 2809 [±15] | 13816 [±34]  | 305 [±5]       | 3560 [±17] | 13095 [±33]  |

**Table A126. Cumulative incidence cases avoided from year 2010 [per 100000 of population in 2010] for Montenegro**

| Year       | Cancers   | CHD & Stroke | Osteoarthritis | Diabetes  | Hypertension |
|------------|-----------|--------------|----------------|-----------|--------------|
| Scenario 1 |           |              |                |           |              |
| 2010       | 1 [±5]    | -1 [±11]     | 1 [±2]         | 1 [±6]    | -1 [±10]     |
| 2020       | 14 [±15]  | 43 [±35]     | 2 [±5]         | 152 [±19] | 207 [±34]    |
| 2030       | 32 [±22]  | 132 [±48]    | 7 [±7]         | 329 [±26] | 503 [±48]    |
| Scenario 2 |           |              |                |           |              |
| 2010       | 3 [±5]    | -4 [±11]     | 1 [±2]         | -1 [±6]   | -2 [±10]     |
| 2020       | 60 [±15]  | 358 [±34]    | 11 [±5]        | 498 [±18] | 715 [±34]    |
| 2030       | 119 [±21] | 758 [±48]    | 25 [±7]        | 981 [±25] | 1434 [±47]   |

**Table A127. Prevalence cases in year [per 100000] for Montenegro**

| Year       | Cancers    | CHD & Stroke | Osteoarthritis | Diabetes   | Hypertension |
|------------|------------|--------------|----------------|------------|--------------|
| Scenario 0 |            |              |                |            |              |
| 2010       | 997 [±9]   | 2105 [±13]   | 335 [±5]       | 5239 [±20] | 15121 [±35]  |
| 2020       | 1151 [±10] | 2512 [±14]   | 341 [±5]       | 5191 [±21] | 16059 [±36]  |
| 2030       | 1218 [±10] | 2644 [±15]   | 359 [±5]       | 5440 [±21] | 17175 [±38]  |
| Scenario 1 |            |              |                |            |              |
| 2010       | 998 [±9]   | 2108 [±13]   | 331 [±5]       | 5257 [±21] | 15121 [±35]  |
| 2020       | 1147 [±10] | 2514 [±14]   | 338 [±5]       | 5075 [±20] | 15888 [±36]  |
| 2030       | 1202 [±10] | 2628 [±15]   | 356 [±5]       | 5178 [±21] | 16756 [±37]  |
| Scenario 2 |            |              |                |            |              |
| 2010       | 1003 [±9]  | 2113 [±13]   | 329 [±5]       | 5249 [±20] | 15107 [±35]  |
| 2020       | 1123 [±10] | 2437 [±14]   | 330 [±5]       | 4807 [±20] | 15490 [±35]  |
| 2030       | 1173 [±10] | 2519 [±14]   | 342 [±5]       | 4741 [±20] | 16128 [±37]  |

**Table A128. Prevalence cases avoided in year [per 100000] for Montenegro**

| Year       | Cancers  | CHD & Stroke | Osteoarthritis | Diabetes  | Hypertension |
|------------|----------|--------------|----------------|-----------|--------------|
| Scenario 1 |          |              |                |           |              |
| 2010       | -1 [±13] | -3 [±18]     | 4 [±7]         | -18 [±29] | 0 [±49]      |
| 2020       | 4 [±14]  | -2 [±20]     | 3 [±7]         | 116 [±29] | 171 [±51]    |
| 2030       | 16 [±14] | 16 [±21]     | 3 [±8]         | 262 [±29] | 419 [±52]    |
| Scenario 2 |          |              |                |           |              |
| 2010       | -6 [±13] | -8 [±18]     | 6 [±7]         | -10 [±29] | 14 [±49]     |
| 2020       | 28 [±13] | 75 [±20]     | 11 [±7]        | 384 [±28] | 569 [±50]    |
| 2030       | 45 [±14] | 125 [±20]    | 17 [±7]        | 699 [±29] | 1047 [±52]   |

## Netherlands

**Table A129. Cumulative incidence cases from year 2010 [per 100000 of population in 2010] for the Netherlands**

| Year       | Cancers    | CHD & Stroke | Osteoarthritis | Diabetes   | Hypertension |
|------------|------------|--------------|----------------|------------|--------------|
| Scenario 0 |            |              |                |            |              |
| 2010       | 237 [±4]   | 1006 [±9]    | 219 [±4]       | 219 [±4]   | 1055 [±9]    |
| 2020       | 3057 [±17] | 12610 [±34]  | 2820 [±16]     | 2744 [±16] | 12989 [±35]  |
| 2030       | 6953 [±28] | 28886 [±57]  | 6272 [±27]     | 6204 [±26] | 28037 [±56]  |
| Scenario 1 |            |              |                |            |              |
| 2010       | 238 [±4]   | 1008 [±9]    | 218 [±4]       | 217 [±4]   | 1058 [±9]    |
| 2020       | 3051 [±17] | 12398 [±34]  | 2742 [±16]     | 2608 [±16] | 12677 [±34]  |
| 2030       | 6907 [±28] | 28380 [±56]  | 6113 [±26]     | 5908 [±26] | 27417 [±55]  |
| Scenario 2 |            |              |                |            |              |
| 2010       | 236 [±4]   | 1006 [±9]    | 218 [±4]       | 223 [±4]   | 1053 [±9]    |
| 2020       | 2962 [±17] | 11771 [±33]  | 2587 [±16]     | 2217 [±14] | 11997 [±33]  |
| 2030       | 6721 [±27] | 26894 [±55]  | 5766 [±25]     | 5072 [±24] | 25886 [±54]  |

**Table A130. Cumulative incidence cases avoided from year 2010 [per 100000 of population in 2010] Netherlands**

| Year       | Cancers   | CHD & Stroke | Osteoarthritis | Diabetes   | Hypertension |
|------------|-----------|--------------|----------------|------------|--------------|
| Scenario 1 |           |              |                |            |              |
| 2010       | -1 [±6]   | -2 [±13]     | 1 [±6]         | 2 [±6]     | -3 [±13]     |
| 2020       | 6 [±22]   | 212 [±45]    | 78 [±21]       | 136 [±21]  | 312 [±45]    |
| 2030       | 46 [±33]  | 506 [±68]    | 159 [±31]      | 296 [±31]  | 620 [±67]    |
| Scenario 2 |           |              |                |            |              |
| 2010       | 1 [±6]    | 0 [±13]      | 1 [±6]         | -4 [±6]    | 2 [±13]      |
| 2020       | 95 [±22]  | 839 [±44]    | 233 [±21]      | 527 [±20]  | 992 [±45]    |
| 2030       | 232 [±33] | 1992 [±67]   | 506 [±31]      | 1132 [±30] | 2151 [±66]   |

**Table A131. Prevalence cases in year [per 100000] for The Netherlands**

| Year       | Cancers    | CHD & Stroke | Osteoarthritis | Diabetes   | Hypertension |
|------------|------------|--------------|----------------|------------|--------------|
| Scenario 0 |            |              |                |            |              |
| 2010       | 2253 [±13] | 4904 [±20]   | 5406 [±21]     | 2436 [±14] | 28935 [±48]  |
| 2020       | 2889 [±16] | 6500 [±25]   | 6336 [±24]     | 2989 [±17] | 35543 [±58]  |
| 2030       | 3450 [±20] | 7927 [±30]   | 7407 [±29]     | 3542 [±20] | 41456 [±68]  |
| Scenario 1 |            |              |                |            |              |
| 2010       | 2266 [±13] | 4905 [±20]   | 5409 [±21]     | 2437 [±14] | 28916 [±48]  |
| 2020       | 2885 [±16] | 6400 [±24]   | 6281 [±24]     | 2892 [±16] | 35285 [±57]  |
| 2030       | 3437 [±20] | 7778 [±30]   | 7307 [±29]     | 3408 [±20] | 41009 [±68]  |
| Scenario 2 |            |              |                |            |              |
| 2010       | 2253 [±13] | 4890 [±20]   | 5408 [±21]     | 2434 [±14] | 28908 [±48]  |
| 2020       | 2850 [±16] | 6114 [±24]   | 6166 [±24]     | 2634 [±16] | 34781 [±57]  |
| 2030       | 3405 [±19] | 7385 [±29]   | 7104 [±28]     | 3060 [±18] | 40045 [±67]  |

**Table A132. Prevalence cases avoided in year [per 100000] for Netherlands**

| Year       | Cancers   | CHD & Stroke | Osteoarthritis | Diabetes  | Hypertension |
|------------|-----------|--------------|----------------|-----------|--------------|
| Scenario 1 |           |              |                |           |              |
| 2010       | -13 [±19] | -1 [±28]     | -3 [±29]       | -1 [±20]  | 19 [±68]     |
| 2020       | 4 [±21]   | 100 [±32]    | 55 [±32]       | 97 [±22]  | 258 [±75]    |
| 2030       | 13 [±23]  | 149 [±35]    | 100 [±34]      | 134 [±24] | 447 [±81]    |
| Scenario 2 |           |              |                |           |              |
| 2010       | 0 [±19]   | 14 [±28]     | -2 [±29]       | 2 [±20]   | 27 [±68]     |
| 2020       | 39 [±21]  | 386 [±32]    | 170 [±32]      | 355 [±21] | 762 [±75]    |
| 2030       | 45 [±23]  | 542 [±35]    | 303 [±34]      | 482 [±23] | 1411 [±81]   |

## Norway

**Table A133. Cumulative incidence cases from year 2010 [per 100000 of population in 2010] for Norway**

| Year       | Cancers    | CHD & Stroke | Osteoarthritis | Diabetes   | Hypertension |
|------------|------------|--------------|----------------|------------|--------------|
| Scenario 0 |            |              |                |            |              |
| 2010       | 200 [±4]   | 861 [±8]     | 493 [±6]       | 124 [±3]   | 550 [±7]     |
| 2020       | 2324 [±14] | 8686 [±27]   | 5756 [±22]     | 1516 [±11] | 6430 [±23]   |
| 2030       | 4596 [±19] | 16870 [±37]  | 11407 [±31]    | 3156 [±16] | 12871 [±33]  |
| Scenario 1 |            |              |                |            |              |
| 2010       | 198 [±4]   | 864 [±8]     | 493 [±6]       | 124 [±3]   | 549 [±7]     |
| 2020       | 2298 [±14] | 8597 [±26]   | 5648 [±21]     | 1425 [±11] | 6269 [±23]   |
| 2030       | 4540 [±19] | 16632 [±37]  | 11177 [±30]    | 2941 [±16] | 12546 [±32]  |
| Scenario 2 |            |              |                |            |              |
| 2010       | 199 [±4]   | 849 [±8]     | 488 [±6]       | 124 [±3]   | 550 [±7]     |
| 2020       | 2240 [±13] | 8224 [±26]   | 5322 [±21]     | 1208 [±10] | 5874 [±22]   |
| 2030       | 4425 [±19] | 15886 [±36]  | 10589 [±29]    | 2514 [±14] | 11683 [±31]  |

**Table A134. Cumulative incidence cases avoided from year 2010 [per 100000 of population in 2010] for Norway**

| Year       | Cancers   | CHD & Stroke | Osteoarthritis | Diabetes  | Hypertension |
|------------|-----------|--------------|----------------|-----------|--------------|
| Scenario 1 |           |              |                |           |              |
| 2010       | 2 [±6]    | -3 [±12]     | 0 [±9]         | 0 [±4]    | 1 [±9]       |
| 2020       | 26 [±19]  | 89 [±37]     | 108 [±30]      | 91 [±15]  | 161 [±32]    |
| 2030       | 56 [±27]  | 238 [±52]    | 230 [±43]      | 215 [±22] | 325 [±45]    |
| Scenario 2 |           |              |                |           |              |
| 2010       | 1 [±6]    | 12 [±12]     | 5 [±9]         | 0 [±4]    | 0 [±9]       |
| 2020       | 84 [±19]  | 462 [±37]    | 434 [±30]      | 308 [±15] | 556 [±31]    |
| 2030       | 171 [±27] | 984 [±51]    | 818 [±42]      | 642 [±21] | 1188 [±44]   |



**Table A135. Prevalence cases in year [per 100000] for Norway**

| Year       | Cancers    | CHD & Stroke | Osteoarthritis | Diabetes   | Hypertension |
|------------|------------|--------------|----------------|------------|--------------|
| Scenario 0 |            |              |                |            |              |
| 2010       | 2862 [±15] | 1361 [±10]   | 10972 [±30]    | 2715 [±15] | 11631 [±31]  |
| 2020       | 3098 [±16] | 1856 [±12]   | 11508 [±31]    | 2572 [±14] | 12324 [±32]  |
| 2030       | 3265 [±16] | 2027 [±13]   | 12301 [±32]    | 2777 [±15] | 13244 [±33]  |
| Scenario 1 |            |              |                |            |              |
| 2010       | 2871 [±15] | 1366 [±10]   | 10991 [±30]    | 2723 [±15] | 11632 [±31]  |
| 2020       | 3093 [±16] | 1832 [±12]   | 11403 [±30]    | 2506 [±14] | 12178 [±31]  |
| 2030       | 3253 [±16] | 1999 [±13]   | 12138 [±32]    | 2647 [±15] | 13011 [±33]  |
| Scenario 2 |            |              |                |            |              |
| 2010       | 2848 [±15] | 1354 [±10]   | 10963 [±30]    | 2725 [±15] | 11610 [±30]  |
| 2020       | 3054 [±16] | 1767 [±12]   | 11184 [±30]    | 2373 [±14] | 11899 [±31]  |
| 2030       | 3210 [±16] | 1913 [±13]   | 11822 [±31]    | 2437 [±14] | 12487 [±32]  |

**Table A136. Prevalence cases avoided in year [per 100000] for Norway**

| Year       | Cancers  | CHD & Stroke | Osteoarthritis | Diabetes  | Hypertension |
|------------|----------|--------------|----------------|-----------|--------------|
| Scenario 1 |          |              |                |           |              |
| 2010       | -9 [±21] | -5 [±15]     | -19 [±42]      | -8 [±21]  | -1 [±43]     |
| 2020       | 5 [±22]  | 24 [±17]     | 105 [±43]      | 66 [±20]  | 146 [±44]    |
| 2030       | 12 [±23] | 28 [±18]     | 163 [±44]      | 130 [±21] | 233 [±46]    |
| Scenario 2 |          |              |                |           |              |
| 2010       | 14 [±21] | 7 [±15]      | 9 [±42]        | -10 [±21] | 21 [±43]     |
| 2020       | 44 [±22] | 89 [±17]     | 324 [±43]      | 199 [±20] | 425 [±44]    |
| 2030       | 55 [±23] | 114 [±18]    | 479 [±44]      | 340 [±20] | 757 [±45]    |

## Poland

**Table A137. Cumulative incidence cases from year 2010 [per 100000 of population in 2010] for Poland**

| Year       | Cancers           | CHD & Stroke       | Osteoarthritis  | Diabetes          | Hypertension       |
|------------|-------------------|--------------------|-----------------|-------------------|--------------------|
| Scenario 0 |                   |                    |                 |                   |                    |
| 2010       | 132 [ $\pm 3$ ]   | 987 [ $\pm 9$ ]    | 19 [ $\pm 1$ ]  | 203 [ $\pm 4$ ]   | 667 [ $\pm 7$ ]    |
| 2020       | 1674 [ $\pm 12$ ] | 10546 [ $\pm 31$ ] | 250 [ $\pm 5$ ] | 2426 [ $\pm 15$ ] | 8627 [ $\pm 28$ ]  |
| 2030       | 3857 [ $\pm 21$ ] | 23564 [ $\pm 51$ ] | 566 [ $\pm 8$ ] | 5396 [ $\pm 25$ ] | 19558 [ $\pm 47$ ] |
| Scenario 1 |                   |                    |                 |                   |                    |
| 2010       | 133 [ $\pm 3$ ]   | 988 [ $\pm 9$ ]    | 20 [ $\pm 1$ ]  | 203 [ $\pm 4$ ]   | 674 [ $\pm 7$ ]    |
| 2020       | 1659 [ $\pm 12$ ] | 10377 [ $\pm 31$ ] | 246 [ $\pm 5$ ] | 2252 [ $\pm 14$ ] | 8369 [ $\pm 28$ ]  |
| 2030       | 3820 [ $\pm 21$ ] | 23163 [ $\pm 51$ ] | 556 [ $\pm 8$ ] | 5011 [ $\pm 24$ ] | 18954 [ $\pm 46$ ] |
| Scenario 2 |                   |                    |                 |                   |                    |
| 2010       | 132 [ $\pm 3$ ]   | 988 [ $\pm 9$ ]    | 19 [ $\pm 1$ ]  | 200 [ $\pm 4$ ]   | 663 [ $\pm 7$ ]    |
| 2020       | 1613 [ $\pm 12$ ] | 9866 [ $\pm 30$ ]  | 234 [ $\pm 5$ ] | 1832 [ $\pm 13$ ] | 7726 [ $\pm 27$ ]  |
| 2030       | 3709 [ $\pm 20$ ] | 22018 [ $\pm 49$ ] | 524 [ $\pm 8$ ] | 4064 [ $\pm 21$ ] | 17327 [ $\pm 44$ ] |

**Table A138. Cumulative incidence cases avoided from year 2010 [per 100000 of population in 2010] Poland**

| Year       | Cancers          | CHD & Stroke      | Osteoarthritis | Diabetes          | Hypertension      |
|------------|------------------|-------------------|----------------|-------------------|-------------------|
| Scenario 1 |                  |                   |                |                   |                   |
| 2010       | -1 [ $\pm 5$ ]   | -1 [ $\pm 13$ ]   | -1 [ $\pm 2$ ] | 0 [ $\pm 6$ ]     | -7 [ $\pm 10$ ]   |
| 2020       | 15 [ $\pm 16$ ]  | 169 [ $\pm 41$ ]  | 4 [ $\pm 6$ ]  | 174 [ $\pm 19$ ]  | 258 [ $\pm 37$ ]  |
| 2030       | 37 [ $\pm 25$ ]  | 401 [ $\pm 61$ ]  | 10 [ $\pm 9$ ] | 385 [ $\pm 29$ ]  | 604 [ $\pm 56$ ]  |
| Scenario 2 |                  |                   |                |                   |                   |
| 2010       | 0 [ $\pm 5$ ]    | -1 [ $\pm 13$ ]   | 0 [ $\pm 2$ ]  | 3 [ $\pm 6$ ]     | 4 [ $\pm 10$ ]    |
| 2020       | 61 [ $\pm 16$ ]  | 680 [ $\pm 40$ ]  | 16 [ $\pm 6$ ] | 594 [ $\pm 18$ ]  | 901 [ $\pm 36$ ]  |
| 2030       | 148 [ $\pm 25$ ] | 1546 [ $\pm 60$ ] | 42 [ $\pm 9$ ] | 1332 [ $\pm 28$ ] | 2231 [ $\pm 54$ ] |

**Table A139. Prevalence cases in year [per 100000] for Poland**

| Year       | Cancers           | CHD & Stroke      | Osteoarthritis  | Diabetes          | Hypertension       |
|------------|-------------------|-------------------|-----------------|-------------------|--------------------|
| Scenario 0 |                   |                   |                 |                   |                    |
| 2010       | 786 [ $\pm 8$ ]   | 1738 [ $\pm 12$ ] | 434 [ $\pm 6$ ] | 5080 [ $\pm 20$ ] | 16306 [ $\pm 36$ ] |
| 2020       | 1050 [ $\pm 10$ ] | 2187 [ $\pm 14$ ] | 494 [ $\pm 7$ ] | 5072 [ $\pm 22$ ] | 19038 [ $\pm 42$ ] |
| 2030       | 1297 [ $\pm 12$ ] | 2755 [ $\pm 18$ ] | 601 [ $\pm 8$ ] | 5759 [ $\pm 25$ ] | 22979 [ $\pm 51$ ] |
| Scenario 1 |                   |                   |                 |                   |                    |
| 2010       | 784 [ $\pm 8$ ]   | 1740 [ $\pm 12$ ] | 434 [ $\pm 6$ ] | 5085 [ $\pm 20$ ] | 16305 [ $\pm 36$ ] |
| 2020       | 1044 [ $\pm 10$ ] | 2143 [ $\pm 14$ ] | 496 [ $\pm 7$ ] | 4937 [ $\pm 21$ ] | 18824 [ $\pm 42$ ] |
| 2030       | 1292 [ $\pm 12$ ] | 2725 [ $\pm 17$ ] | 596 [ $\pm 8$ ] | 5486 [ $\pm 25$ ] | 22566 [ $\pm 50$ ] |
| Scenario 2 |                   |                   |                 |                   |                    |
| 2010       | 781 [ $\pm 8$ ]   | 1735 [ $\pm 12$ ] | 433 [ $\pm 6$ ] | 5086 [ $\pm 20$ ] | 16285 [ $\pm 36$ ] |
| 2020       | 1022 [ $\pm 10$ ] | 2079 [ $\pm 14$ ] | 485 [ $\pm 7$ ] | 4682 [ $\pm 21$ ] | 18404 [ $\pm 41$ ] |
| 2030       | 1268 [ $\pm 12$ ] | 2608 [ $\pm 17$ ] | 579 [ $\pm 8$ ] | 4923 [ $\pm 23$ ] | 21503 [ $\pm 49$ ] |

**Table A140. Prevalence cases avoided in year [per 100000] Poland**

| Year       | Cancers         | CHD & Stroke     | Osteoarthritis  | Diabetes         | Hypertension      |
|------------|-----------------|------------------|-----------------|------------------|-------------------|
| Scenario 1 |                 |                  |                 |                  |                   |
| 2010       | 2 [ $\pm 11$ ]  | -2 [ $\pm 17$ ]  | 0 [ $\pm 8$ ]   | -5 [ $\pm 29$ ]  | 1 [ $\pm 51$ ]    |
| 2020       | 6 [ $\pm 13$ ]  | 44 [ $\pm 19$ ]  | -2 [ $\pm 9$ ]  | 135 [ $\pm 28$ ] | 214 [ $\pm 55$ ]  |
| 2030       | 5 [ $\pm 14$ ]  | 30 [ $\pm 21$ ]  | 5 [ $\pm 10$ ]  | 273 [ $\pm 30$ ] | 413 [ $\pm 60$ ]  |
| Scenario 2 |                 |                  |                 |                  |                   |
| 2010       | 5 [ $\pm 11$ ]  | 3 [ $\pm 17$ ]   | 1 [ $\pm 8$ ]   | -6 [ $\pm 29$ ]  | 21 [ $\pm 51$ ]   |
| 2020       | 28 [ $\pm 13$ ] | 108 [ $\pm 18$ ] | 9 [ $\pm 9$ ]   | 390 [ $\pm 28$ ] | 634 [ $\pm 55$ ]  |
| 2030       | 29 [ $\pm 14$ ] | 147 [ $\pm 21$ ] | 22 [ $\pm 10$ ] | 836 [ $\pm 29$ ] | 1476 [ $\pm 60$ ] |

## Portugal

**Table A141. Cumulative incidence cases from year 2010 [per 100000 of population in 2010] for Portugal**

| Year       | Cancers    | CHD & Stroke | Osteoarthritis | Diabetes   | Hypertension |
|------------|------------|--------------|----------------|------------|--------------|
| Scenario 0 |            |              |                |            |              |
| 2010       | 169 [±4]   | 1091 [±9]    | 16 [±1]        | 166 [±4]   | 739 [±8]     |
| 2020       | 1950 [±13] | 12046 [±31]  | 192 [±4]       | 1794 [±12] | 8058 [±26]   |
| 2030       | 3998 [±19] | 24590 [±46]  | 391 [±6]       | 3507 [±17] | 15738 [±37]  |
| Scenario 1 |            |              |                |            |              |
| 2010       | 170 [±4]   | 1087 [±9]    | 17 [±1]        | 166 [±4]   | 741 [±8]     |
| 2020       | 1932 [±13] | 11925 [±31]  | 189 [±4]       | 1688 [±12] | 7877 [±25]   |
| 2030       | 3965 [±19] | 24351 [±46]  | 381 [±6]       | 3278 [±17] | 15353 [±37]  |
| Scenario 2 |            |              |                |            |              |
| 2010       | 168 [±4]   | 1101 [±9]    | 16 [±1]        | 165 [±4]   | 745 [±8]     |
| 2020       | 1870 [±12] | 11493 [±31]  | 175 [±4]       | 1360 [±11] | 7255 [±24]   |
| 2030       | 3819 [±18] | 23379 [±45]  | 352 [±6]       | 2655 [±15] | 14046 [±35]  |

**Table A142. Cumulative incidence cases avoided from year 2010 [per 100000 of population in 2010] Portugal**

| Year       | Cancers   | CHD & Stroke | Osteoarthritis | Diabetes  | Hypertension |
|------------|-----------|--------------|----------------|-----------|--------------|
| Scenario 1 |           |              |                |           |              |
| 2010       | -1 [±5]   | 4 [±13]      | -1 [±2]        | 0 [±5]    | -2 [±11]     |
| 2020       | 18 [±18]  | 121 [±44]    | 3 [±6]         | 106 [±17] | 181 [±36]    |
| 2030       | 33 [±25]  | 239 [±63]    | 10 [±8]        | 229 [±23] | 385 [±50]    |
| Scenario 2 |           |              |                |           |              |
| 2010       | 1 [±5]    | -10 [±13]    | 0 [±2]         | 1 [±5]    | -6 [±11]     |
| 2020       | 80 [±17]  | 553 [±43]    | 17 [±5]        | 434 [±16] | 803 [±35]    |
| 2030       | 179 [±25] | 1211 [±62]   | 39 [±8]        | 852 [±22] | 1692 [±49]   |

**Table A143. Prevalence cases in year [per 100000] for Portugal**

| Year       | Cancers         | CHD & Stroke      | Osteoarthritis  | Diabetes          | Hypertension       |
|------------|-----------------|-------------------|-----------------|-------------------|--------------------|
| Scenario 0 |                 |                   |                 |                   |                    |
| 2010       | 660 [ $\pm 7$ ] | 4159 [ $\pm 18$ ] | 416 [ $\pm 6$ ] | 4177 [ $\pm 18$ ] | 17216 [ $\pm 37$ ] |
| 2020       | 810 [ $\pm 8$ ] | 5118 [ $\pm 21$ ] | 437 [ $\pm 6$ ] | 4528 [ $\pm 19$ ] | 19181 [ $\pm 40$ ] |
| 2030       | 917 [ $\pm 9$ ] | 5759 [ $\pm 22$ ] | 470 [ $\pm 6$ ] | 4791 [ $\pm 20$ ] | 20435 [ $\pm 42$ ] |
| Scenario 1 |                 |                   |                 |                   |                    |
| 2010       | 665 [ $\pm 7$ ] | 4151 [ $\pm 18$ ] | 422 [ $\pm 6$ ] | 4181 [ $\pm 18$ ] | 17223 [ $\pm 37$ ] |
| 2020       | 808 [ $\pm 8$ ] | 5069 [ $\pm 20$ ] | 439 [ $\pm 6$ ] | 4442 [ $\pm 19$ ] | 19037 [ $\pm 40$ ] |
| 2030       | 914 [ $\pm 9$ ] | 5655 [ $\pm 22$ ] | 466 [ $\pm 6$ ] | 4601 [ $\pm 20$ ] | 20130 [ $\pm 42$ ] |
| Scenario 2 |                 |                   |                 |                   |                    |
| 2010       | 667 [ $\pm 7$ ] | 4189 [ $\pm 18$ ] | 416 [ $\pm 6$ ] | 4172 [ $\pm 18$ ] | 17217 [ $\pm 37$ ] |
| 2020       | 791 [ $\pm 8$ ] | 4911 [ $\pm 20$ ] | 426 [ $\pm 6$ ] | 4157 [ $\pm 18$ ] | 18545 [ $\pm 39$ ] |
| 2030       | 879 [ $\pm 9$ ] | 5408 [ $\pm 22$ ] | 445 [ $\pm 6$ ] | 4117 [ $\pm 19$ ] | 19208 [ $\pm 41$ ] |

**Table A144. Prevalence cases avoided in year [per 100000] Portugal**

| Year       | Cancers         | CHD & Stroke     | Osteoarthritis | Diabetes         | Hypertension      |
|------------|-----------------|------------------|----------------|------------------|-------------------|
| Scenario 1 |                 |                  |                |                  |                   |
| 2010       | -5 [ $\pm 10$ ] | 8 [ $\pm 26$ ]   | -6 [ $\pm 8$ ] | -4 [ $\pm 26$ ]  | -7 [ $\pm 52$ ]   |
| 2020       | 2 [ $\pm 11$ ]  | 49 [ $\pm 29$ ]  | -2 [ $\pm 8$ ] | 86 [ $\pm 27$ ]  | 144 [ $\pm 55$ ]  |
| 2030       | 3 [ $\pm 12$ ]  | 104 [ $\pm 30$ ] | 4 [ $\pm 9$ ]  | 190 [ $\pm 27$ ] | 305 [ $\pm 57$ ]  |
| Scenario 2 |                 |                  |                |                  |                   |
| 2010       | -7 [ $\pm 10$ ] | -30 [ $\pm 26$ ] | 0 [ $\pm 8$ ]  | 5 [ $\pm 26$ ]   | -1 [ $\pm 52$ ]   |
| 2020       | 19 [ $\pm 11$ ] | 207 [ $\pm 28$ ] | 11 [ $\pm 8$ ] | 371 [ $\pm 26$ ] | 636 [ $\pm 55$ ]  |
| 2030       | 38 [ $\pm 12$ ] | 351 [ $\pm 30$ ] | 25 [ $\pm 9$ ] | 674 [ $\pm 27$ ] | 1227 [ $\pm 56$ ] |

## Republic of Macedonia

**Table A145. Cumulative incidence cases from year 2010 [per 100000 of population in 2010] for The Republic of Macedonia**

| Year       | Cancers    | CHD & Stroke | Osteoarthritis | Diabetes   | Hypertension |
|------------|------------|--------------|----------------|------------|--------------|
| Scenario 0 |            |              |                |            |              |
| 2010       | 134 [±3]   | 1238 [±10]   | 15 [±1]        | 252 [±4]   | 1781 [±12]   |
| 2020       | 1572 [±11] | 12717 [±32]  | 175 [±4]       | 2771 [±15] | 17912 [±39]  |
| 2030       | 3198 [±17] | 25371 [±47]  | 354 [±6]       | 5413 [±22] | 34255 [±55]  |
| Scenario 1 |            |              |                |            |              |
| 2010       | 137 [±3]   | 1230 [±10]   | 14 [±1]        | 255 [±5]   | 1779 [±12]   |
| 2020       | 1572 [±11] | 12536 [±32]  | 165 [±4]       | 2666 [±15] | 17602 [±38]  |
| 2030       | 3182 [±17] | 24985 [±47]  | 341 [±5]       | 5214 [±21] | 33870 [±54]  |
| Scenario 2 |            |              |                |            |              |
| 2010       | 135 [±3]   | 1233 [±10]   | 15 [±1]        | 252 [±4]   | 1779 [±12]   |
| 2020       | 1511 [±11] | 12144 [±32]  | 157 [±4]       | 2237 [±14] | 16772 [±37]  |
| 2030       | 3079 [±16] | 24149 [±46]  | 325 [±5]       | 4390 [±20] | 32856 [±54]  |

**Table A146. Cumulative incidence cases avoided from year 2010 [per 100000 of population in 2010] for Macedonia**

| Year       | Cancers   | CHD & Stroke | Diabetes   | Hypertension | Osteoarthritis |
|------------|-----------|--------------|------------|--------------|----------------|
| Scenario 1 |           |              |            |              |                |
| 2010       | -3 [±5]   | 8 [±14]      | -3 [±6]    | 2 [±17]      | 1 [±2]         |
| 2020       | 0 [±16]   | 181 [±45]    | 105 [±21]  | 310 [±53]    | 10 [±5]        |
| 2030       | 16 [±23]  | 386 [±63]    | 199 [±29]  | 385 [±74]    | 13 [±7]        |
| Scenario 2 |           |              |            |              |                |
| 2010       | -1 [±5]   | 5 [±14]      | 0 [±6]     | 2 [±17]      | 0 [±2]         |
| 2020       | 61 [±16]  | 573 [±45]    | 534 [±20]  | 1140 [±53]   | 18 [±5]        |
| 2030       | 119 [±22] | 1222 [±63]   | 1023 [±28] | 1399 [±73]   | 29 [±7]        |

**Table A147. Prevalence cases in year [per 100000] for The Republic of Macedonia**

| Year       | Cancers           | CHD & Stroke      | Osteoarthritis  | Diabetes          | Hypertension       |
|------------|-------------------|-------------------|-----------------|-------------------|--------------------|
| Scenario 0 |                   |                   |                 |                   |                    |
| 2010       | 960 [ $\pm 9$ ]   | 3920 [ $\pm 18$ ] | 322 [ $\pm 5$ ] | 5704 [ $\pm 21$ ] | 48850 [ $\pm 63$ ] |
| 2020       | 1161 [ $\pm 10$ ] | 4671 [ $\pm 20$ ] | 340 [ $\pm 5$ ] | 6219 [ $\pm 23$ ] | 53661 [ $\pm 67$ ] |
| 2030       | 1271 [ $\pm 11$ ] | 5133 [ $\pm 21$ ] | 371 [ $\pm 6$ ] | 6487 [ $\pm 24$ ] | 57062 [ $\pm 71$ ] |
| Scenario 1 |                   |                   |                 |                   |                    |
| 2010       | 962 [ $\pm 9$ ]   | 3921 [ $\pm 18$ ] | 321 [ $\pm 5$ ] | 5709 [ $\pm 21$ ] | 48826 [ $\pm 62$ ] |
| 2020       | 1160 [ $\pm 10$ ] | 4597 [ $\pm 20$ ] | 332 [ $\pm 5$ ] | 6144 [ $\pm 23$ ] | 53373 [ $\pm 67$ ] |
| 2030       | 1260 [ $\pm 10$ ] | 5015 [ $\pm 21$ ] | 364 [ $\pm 6$ ] | 6368 [ $\pm 24$ ] | 56800 [ $\pm 71$ ] |
| Scenario 2 |                   |                   |                 |                   |                    |
| 2010       | 959 [ $\pm 9$ ]   | 3923 [ $\pm 18$ ] | 325 [ $\pm 5$ ] | 5710 [ $\pm 21$ ] | 48916 [ $\pm 63$ ] |
| 2020       | 1131 [ $\pm 10$ ] | 4433 [ $\pm 19$ ] | 327 [ $\pm 5$ ] | 5801 [ $\pm 22$ ] | 52737 [ $\pm 66$ ] |
| 2030       | 1239 [ $\pm 10$ ] | 4810 [ $\pm 20$ ] | 354 [ $\pm 6$ ] | 5802 [ $\pm 23$ ] | 56131 [ $\pm 70$ ] |

**Table A148. Prevalence cases avoided in year [per 100000] for Macedonia**

| Year       | Cancers         | CHD & Stroke     | Diabetes         | Hypertension     | Osteoarthritis |
|------------|-----------------|------------------|------------------|------------------|----------------|
| Scenario 1 |                 |                  |                  |                  |                |
| 2010       | -2 [ $\pm 12$ ] | -1 [ $\pm 25$ ]  | -5 [ $\pm 30$ ]  | 24 [ $\pm 88$ ]  | 1 [ $\pm 7$ ]  |
| 2020       | 1 [ $\pm 14$ ]  | 74 [ $\pm 27$ ]  | 75 [ $\pm 31$ ]  | 288 [ $\pm 93$ ] | 8 [ $\pm 7$ ]  |
| 2030       | 11 [ $\pm 14$ ] | 118 [ $\pm 28$ ] | 119 [ $\pm 32$ ] | 262 [ $\pm 95$ ] | 7 [ $\pm 8$ ]  |
| Scenario 2 |                 |                  |                  |                  |                |
| 2010       | 1 [ $\pm 12$ ]  | -3 [ $\pm 25$ ]  | -6 [ $\pm 30$ ]  | -66 [ $\pm 88$ ] | -3 [ $\pm 7$ ] |
| 2020       | 30 [ $\pm 14$ ] | 238 [ $\pm 27$ ] | 418 [ $\pm 31$ ] | 924 [ $\pm 92$ ] | 13 [ $\pm 7$ ] |
| 2030       | 32 [ $\pm 14$ ] | 323 [ $\pm 28$ ] | 685 [ $\pm 31$ ] | 931 [ $\pm 95$ ] | 17 [ $\pm 8$ ] |

## Republic of Moldova

**Table A149. Cumulative incidence cases from year 2010 [per 100000 of population in 2010] for Republic of Moldova**

| Year       | Cancers    | CHD & Stroke | Osteoarthritis | Diabetes   | Hypertension |
|------------|------------|--------------|----------------|------------|--------------|
| Scenario 0 |            |              |                |            |              |
| 2010       | 136 [±3]   | 673 [±7]     | 25 [±1]        | 223 [±4]   | 657 [±7]     |
| 2020       | 1594 [±11] | 7871 [±25]   | 286 [±5]       | 2689 [±15] | 6871 [±24]   |
| 2030       | 3223 [±17] | 16206 [±38]  | 590 [±7]       | 5484 [±22] | 13603 [±34]  |
| Scenario 1 |            |              |                |            |              |
| 2010       | 139 [±3]   | 672 [±7]     | 26 [±1]        | 223 [±4]   | 653 [±7]     |
| 2020       | 1577 [±11] | 7784 [±25]   | 281 [±5]       | 2478 [±14] | 6698 [±23]   |
| 2030       | 3183 [±17] | 15966 [±37]  | 576 [±7]       | 5060 [±21] | 13167 [±34]  |
| Scenario 2 |            |              |                |            |              |
| 2010       | 140 [±3]   | 685 [±7]     | 26 [±1]        | 224 [±4]   | 657 [±7]     |
| 2020       | 1531 [±11] | 7434 [±25]   | 262 [±5]       | 2080 [±13] | 6274 [±23]   |
| 2030       | 3075 [±16] | 15177 [±36]  | 535 [±7]       | 4234 [±19] | 12310 [±33]  |

**Table A150. Cumulative incidence cases avoided from year 2010 [per 100000 of population in 2010] for Moldova**

| Year       | Cancers   | CHD & Stroke | Diabetes   | Hypertension | Osteoarthritis |
|------------|-----------|--------------|------------|--------------|----------------|
| Scenario 1 |           |              |            |              |                |
| 2010       | -3 [±5]   | 1 [±10]      | 0 [±6]     | 4 [±10]      | -1 [±2]        |
| 2020       | 17 [±16]  | 87 [±35]     | 211 [±20]  | 173 [±33]    | 5 [±7]         |
| 2030       | 40 [±23]  | 240 [±51]    | 424 [±29]  | 436 [±46]    | 14 [±10]       |
| Scenario 2 |           |              |            |              |                |
| 2010       | -4 [±5]   | -12 [±10]    | -1 [±6]    | 0 [±10]      | -1 [±2]        |
| 2020       | 63 [±16]  | 437 [±35]    | 609 [±20]  | 597 [±32]    | 24 [±7]        |
| 2030       | 148 [±22] | 1029 [±50]   | 1250 [±28] | 1293 [±46]   | 55 [±9]        |



**Table A151. Prevalence cases in year [per 100000] for Republic of Moldova**

| Year       | Cancers    | CHD & Stroke | Osteoarthritis | Diabetes   | Hypertension |
|------------|------------|--------------|----------------|------------|--------------|
| Scenario 0 |            |              |                |            |              |
| 2010       | 796 [±8]   | 4438 [±19]   | 520 [±6]       | 4498 [±19] | 16552 [±36]  |
| 2020       | 986 [±9]   | 5303 [±21]   | 550 [±7]       | 5504 [±21] | 18310 [±39]  |
| 2030       | 1048 [±10] | 5850 [±23]   | 599 [±7]       | 6308 [±23] | 19356 [±41]  |
| Scenario 1 |            |              |                |            |              |
| 2010       | 794 [±8]   | 4440 [±19]   | 522 [±6]       | 4518 [±19] | 16553 [±36]  |
| 2020       | 980 [±9]   | 5249 [±21]   | 543 [±7]       | 5331 [±21] | 18158 [±39]  |
| 2030       | 1030 [±9]  | 5738 [±22]   | 588 [±7]       | 5976 [±23] | 19001 [±41]  |
| Scenario 2 |            |              |                |            |              |
| 2010       | 807 [±8]   | 4450 [±19]   | 524 [±6]       | 4512 [±19] | 16543 [±36]  |
| 2020       | 959 [±9]   | 5045 [±20]   | 528 [±7]       | 4985 [±20] | 17790 [±38]  |
| 2030       | 1007 [±9]  | 5447 [±22]   | 564 [±7]       | 5368 [±22] | 18386 [±40]  |

**Table A152. Prevalence cases avoided in year [per 100000] for Moldova**

| Year       | Cancers   | CHD & Stroke | Diabetes  | Hypertension | Osteoarthritis |
|------------|-----------|--------------|-----------|--------------|----------------|
| Scenario 1 |           |              |           |              |                |
| 2010       | 2 [±11]   | -2 [±27]     | -20 [±27] | -1 [±51]     | -2 [±9]        |
| 2020       | 6 [±13]   | 54 [±29]     | 173 [±29] | 152 [±54]    | 7 [±9]         |
| 2030       | 18 [±13]  | 112 [±30]    | 332 [±31] | 355 [±55]    | 11 [±10]       |
| Scenario 2 |           |              |           |              |                |
| 2010       | -11 [±11] | -12 [±27]    | -14 [±27] | 9 [±51]      | -4 [±9]        |
| 2020       | 27 [±12]  | 258 [±29]    | 519 [±29] | 520 [±54]    | 22 [±9]        |
| 2030       | 41 [±13]  | 403 [±30]    | 940 [±31] | 970 [±55]    | 35 [±10]       |

## Romania

**Table A153. Cumulative incidence cases from year 2010 [per 100000 of population in 2010] for Romania**

| Year       | Cancers    | CHD & Stroke | Osteoarthritis | Diabetes   | Hypertension |
|------------|------------|--------------|----------------|------------|--------------|
| Scenario 0 |            |              |                |            |              |
| 2010       | 149 [+3]   | 1814 [+12]   | 16 [+1]        | 225 [+4]   | 738 [+8]     |
| 2020       | 1636 [+12] | 16871 [+38]  | 181 [+4]       | 2788 [+16] | 8843 [+28]   |
| 2030       | 3352 [+18] | 32601 [+56]  | 367 [+6]       | 5890 [+24] | 18285 [+42]  |
| Scenario 1 |            |              |                |            |              |
| 2010       | 145 [+3]   | 1794 [+12]   | 16 [+1]        | 208 [+4]   | 716 [+8]     |
| 2020       | 1644 [+12] | 16730 [+38]  | 177 [+4]       | 2576 [+15] | 8570 [+27]   |
| 2030       | 3356 [+18] | 32217 [+56]  | 357 [+6]       | 5403 [+23] | 17732 [+41]  |
| Scenario 2 |            |              |                |            |              |
| 2010       | 143 [+3]   | 1685 [+12]   | 15 [+1]        | 162 [+4]   | 653 [+7]     |
| 2020       | 1632 [+12] | 15922 [+37]  | 166 [+4]       | 2048 [+13] | 7842 [+26]   |
| 2030       | 3346 [+18] | 30755 [+54]  | 343 [+6]       | 4340 [+20] | 16372 [+39]  |

**Table A154. Cumulative incidence cases avoided from year 2010 [per 100,000 of population in 2010] Romania**

| Year       | Cancers  | CHD & Stroke | Osteoarthritis | Diabetes   | Hypertension |
|------------|----------|--------------|----------------|------------|--------------|
| Scenario 1 |          |              |                |            |              |
| 2010       | 4 [+5]   | 20 [+17]     | 0 [+2]         | 17 [+6]    | 22 [+11]     |
| 2020       | -8 [+16] | 141 [+52]    | 4 [+5]         | 212 [+21]  | 273 [+37]    |
| 2030       | -4 [+23] | 384 [+72]    | 10 [+8]        | 487 [+30]  | 553 [+54]    |
| Scenario 2 |          |              |                |            |              |
| 2010       | 6 [+5]   | 129 [+17]    | 1 [+2]         | 63 [+6]    | 85 [+11]     |
| 2020       | 4 [+16]  | 949 [+51]    | 15 [+5]        | 740 [+20]  | 1001 [+37]   |
| 2030       | 6 [+23]  | 1846 [+71]   | 24 [+8]        | 1550 [+29] | 1913 [+53]   |

**Table A155. Prevalence cases in year [per 100,000] for Romania**

| Year       | Cancers    | CHD & Stroke | Osteoarthritis | Diabetes   | Hypertension |
|------------|------------|--------------|----------------|------------|--------------|
| Scenario 0 |            |              |                |            |              |
| 2010       | 807 [+8]   | 4603 [+19]   | 347 [+5]       | 5446 [+21] | 16357 [+36]  |
| 2020       | 916 [+9]   | 4673 [+20]   | 328 [+5]       | 5222 [+21] | 17258 [+39]  |
| 2030       | 1012 [+10] | 5050 [+22]   | 351 [+6]       | 5856 [+24] | 19198 [+43]  |
| Scenario 1 |            |              |                |            |              |
| 2010       | 805 [+8]   | 4586 [+19]   | 343 [+5]       | 5439 [+21] | 16340 [+36]  |
| 2020       | 924 [+9]   | 4660 [+20]   | 321 [+5]       | 5058 [+21] | 17048 [+39]  |
| 2030       | 1012 [+10] | 4971 [+22]   | 343 [+6]       | 5512 [+23] | 18817 [+42]  |
| Scenario 2 |            |              |                |            |              |
| 2010       | 798 [+8]   | 4481 [+19]   | 343 [+5]       | 5384 [+21] | 16284 [+36]  |
| 2020       | 924 [+9]   | 4506 [+20]   | 319 [+5]       | 4702 [+20] | 16599 [+38]  |
| 2030       | 1026 [+10] | 4825 [+21]   | 343 [+6]       | 4877 [+22] | 18068 [+41]  |

**Table A156. Prevalence cases avoided in year [per 100,000] Romania**

| Year       | Cancers   | CHD & Stroke | Osteoarthritis | Diabetes  | Hypertension |
|------------|-----------|--------------|----------------|-----------|--------------|
| Scenario 1 |           |              |                |           |              |
| 2010       | 2 [+11]   | 17 [+27]     | 4 [+7]         | 7 [+30]   | 17 [+51]     |
| 2020       | -8 [+12]  | 13 [+27]     | 7 [+7]         | 164 [+29] | 210 [+52]    |
| 2030       | 0 [+13]   | 79 [+28]     | 8 [+7]         | 344 [+30] | 381 [+55]    |
| Scenario 2 |           |              |                |           |              |
| 2010       | 9 [+11]   | 122 [+27]    | 4 [+7]         | 62 [+29]  | 73 [+51]     |
| 2020       | -8 [+12]  | 167 [+27]    | 9 [+7]         | 520 [+28] | 659 [+52]    |
| 2030       | -14 [+13] | 225 [+28]    | 8 [+7]         | 979 [+29] | 1130 [+55]   |

## Russian Federation

**Table A157. Cumulative incidence cases from year 2010 [per 100000 of population in 2010] for Russian Federation**

| Year       | Cancers    | CHD & Stroke | Osteoarthritis | Diabetes   | Hypertension |
|------------|------------|--------------|----------------|------------|--------------|
| Scenario 0 |            |              |                |            |              |
| 2010       | 234 [±4]   | 843 [±8]     | 22 [±1]        | 56 [±2]    | 704 [±8]     |
| 2020       | 3042 [±17] | 10400 [±32]  | 288 [±5]       | 732 [±8]   | 8437 [±28]   |
| 2030       | 7117 [±29] | 23994 [±53]  | 685 [±9]       | 1765 [±14] | 20107 [±49]  |
| Scenario 1 |            |              |                |            |              |
| 2010       | 235 [±4]   | 839 [±8]     | 23 [±1]        | 58 [±2]    | 702 [±7]     |
| 2020       | 3015 [±17] | 10319 [±31]  | 286 [±5]       | 687 [±8]   | 8239 [±28]   |
| 2030       | 7050 [±29] | 23764 [±53]  | 682 [±9]       | 1646 [±14] | 19560 [±48]  |
| Scenario 2 |            |              |                |            |              |
| 2010       | 236 [±4]   | 847 [±8]     | 23 [±1]        | 56 [±2]    | 706 [±8]     |
| 2020       | 2906 [±17] | 9989 [±31]   | 274 [±5]       | 550 [±7]   | 7645 [±27]   |
| 2030       | 6812 [±28] | 22959 [±52]  | 650 [±9]       | 1307 [±12] | 18009 [±46]  |

**Table A158. Cumulative incidence cases avoided from year 2010 [per 100000 of population in 2010] for Russia**

| Year       | Cancers   | CHD & Stroke | Osteoarthritis | Diabetes  | Hypertension |
|------------|-----------|--------------|----------------|-----------|--------------|
| Scenario 1 |           |              |                |           |              |
| 2010       | -1 [±6]   | 4 [±12]      | -1 [±2]        | -2 [±3]   | 2 [±11]      |
| 2020       | 27 [±22]  | 81 [±41]     | 2 [±7]         | 45 [±11]  | 198 [±37]    |
| 2030       | 67 [±34]  | 230 [±62]    | 3 [±10]        | 119 [±17] | 547 [±56]    |
| Scenario 2 |           |              |                |           |              |
| 2010       | -2 [±6]   | -4 [±12]     | -1 [±2]        | 0 [±3]    | -2 [±11]     |
| 2020       | 136 [±22] | 411 [±40]    | 14 [±7]        | 182 [±10] | 792 [±36]    |
| 2030       | 305 [±33] | 1035 [±61]   | 35 [±10]       | 458 [±16] | 2098 [±55]   |

**Table A159. Prevalence cases in year [per 100000] for Russian Federation**

| Year       | Cancers    | CHD & Stroke | Osteoarthritis | Diabetes   | Hypertension |
|------------|------------|--------------|----------------|------------|--------------|
| Scenario 0 |            |              |                |            |              |
| 2010       | 1313 [±10] | 4014 [±18]   | 319 [±5]       | 1234 [±10] | 17518 [±37]  |
| 2020       | 1785 [±13] | 5544 [±23]   | 350 [±6]       | 1510 [±12] | 20711 [±44]  |
| 2030       | 2208 [±16] | 7034 [±29]   | 430 [±7]       | 1911 [±15] | 24987 [±54]  |
| Scenario 1 |            |              |                |            |              |
| 2010       | 1310 [±10] | 4017 [±18]   | 323 [±5]       | 1237 [±10] | 17527 [±37]  |
| 2020       | 1771 [±13] | 5521 [±23]   | 350 [±6]       | 1474 [±12] | 20566 [±44]  |
| 2030       | 2197 [±16] | 6972 [±29]   | 432 [±7]       | 1817 [±15] | 24579 [±54]  |
| Scenario 2 |            |              |                |            |              |
| 2010       | 1308 [±10] | 4002 [±18]   | 320 [±5]       | 1233 [±10] | 17552 [±37]  |
| 2020       | 1732 [±13] | 5363 [±23]   | 338 [±6]       | 1351 [±11] | 20106 [±44]  |
| 2030       | 2147 [±16] | 6722 [±28]   | 416 [±7]       | 1553 [±14] | 23524 [±53]  |

**Table A160. Prevalence cases avoided in year [per 100000] for Russia**

| Year       | Cancers   | CHD & Stroke | Osteoarthritis | Diabetes  | Hypertension |
|------------|-----------|--------------|----------------|-----------|--------------|
| Scenario 1 |           |              |                |           |              |
| 2010       | 4 [±59]   | -4 [±23]     | -4 [±7]        | 5 [±10]   | -3 [±47]     |
| 2020       | 111 [±58] | 9 [±24]      | -3 [±6]        | 25 [±12]  | 147 [±51]    |
| 2030       | 153 [±60] | 14 [±24]     | 4 [±5]         | 68 [±13]  | 348 [±55]    |
| Scenario 2 |           |              |                |           |              |
| 2010       | 21 [±59]  | 10 [±23]     | 0 [±7]         | 5 [±10]   | 6 [±47]      |
| 2020       | 523 [±58] | 41 [±23]     | 3 [±6]         | 95 [±11]  | 485 [±51]    |
| 2030       | 624 [±59] | 62 [±24]     | 13 [±5]        | 201 [±12] | 1195 [±55]   |

## San Marino

**Table A161. Cumulative incidence cases from year 2010 [per 100000 of population in 2010] for San Marino**

| Year       | Cancers           | CHD & Stroke       | Osteoarthritis  | Diabetes          | Hypertension       |
|------------|-------------------|--------------------|-----------------|-------------------|--------------------|
| Scenario 0 |                   |                    |                 |                   |                    |
| 2010       | 241 [ $\pm 4$ ]   | 2104 [ $\pm 13$ ]  | 14 [ $\pm 1$ ]  | 229 [ $\pm 4$ ]   | 659 [ $\pm 7$ ]    |
| 2020       | 2921 [ $\pm 17$ ] | 17245 [ $\pm 42$ ] | 192 [ $\pm 4$ ] | 2843 [ $\pm 17$ ] | 7904 [ $\pm 28$ ]  |
| 2030       | 5726 [ $\pm 25$ ] | 28951 [ $\pm 57$ ] | 387 [ $\pm 7$ ] | 5673 [ $\pm 25$ ] | 15689 [ $\pm 42$ ] |
| Scenario 1 |                   |                    |                 |                   |                    |
| 2010       | 242 [ $\pm 4$ ]   | 2095 [ $\pm 13$ ]  | 15 [ $\pm 1$ ]  | 225 [ $\pm 4$ ]   | 662 [ $\pm 7$ ]    |
| 2020       | 2897 [ $\pm 17$ ] | 17077 [ $\pm 42$ ] | 191 [ $\pm 4$ ] | 2846 [ $\pm 17$ ] | 7694 [ $\pm 28$ ]  |
| 2030       | 5659 [ $\pm 25$ ] | 28640 [ $\pm 56$ ] | 382 [ $\pm 7$ ] | 5672 [ $\pm 25$ ] | 15224 [ $\pm 41$ ] |
| Scenario 2 |                   |                    |                 |                   |                    |
| 2010       | 238 [ $\pm 4$ ]   | 2087 [ $\pm 13$ ]  | 15 [ $\pm 1$ ]  | 229 [ $\pm 4$ ]   | 659 [ $\pm 7$ ]    |
| 2020       | 2792 [ $\pm 17$ ] | 16509 [ $\pm 41$ ] | 180 [ $\pm 4$ ] | 2850 [ $\pm 17$ ] | 7108 [ $\pm 27$ ]  |
| 2030       | 5461 [ $\pm 25$ ] | 27686 [ $\pm 55$ ] | 355 [ $\pm 6$ ] | 5668 [ $\pm 25$ ] | 13966 [ $\pm 39$ ] |

**Table A162. Cumulative incidence cases avoided from year 2010 [per 100000 of population in 2010] for San Marino**

| Year       | Cancers          | CHD & Stroke      | Osteoarthritis | Diabetes        | Hypertension      |
|------------|------------------|-------------------|----------------|-----------------|-------------------|
| Scenario 1 |                  |                   |                |                 |                   |
| 2010       | -1 [ $\pm 6$ ]   | 9 [ $\pm 18$ ]    | -1 [ $\pm 2$ ] | 4 [ $\pm 6$ ]   | -3 [ $\pm 10$ ]   |
| 2020       | 24 [ $\pm 22$ ]  | 168 [ $\pm 52$ ]  | 1 [ $\pm 6$ ]  | -3 [ $\pm 21$ ] | 210 [ $\pm 35$ ]  |
| 2030       | 67 [ $\pm 30$ ]  | 311 [ $\pm 68$ ]  | 5 [ $\pm 8$ ]  | 1 [ $\pm 30$ ]  | 465 [ $\pm 50$ ]  |
| Scenario 2 |                  |                   |                |                 |                   |
| 2010       | 3 [ $\pm 6$ ]    | 17 [ $\pm 18$ ]   | -1 [ $\pm 2$ ] | 0 [ $\pm 6$ ]   | 0 [ $\pm 10$ ]    |
| 2020       | 129 [ $\pm 21$ ] | 736 [ $\pm 52$ ]  | 12 [ $\pm 5$ ] | -7 [ $\pm 21$ ] | 796 [ $\pm 35$ ]  |
| 2030       | 265 [ $\pm 30$ ] | 1265 [ $\pm 67$ ] | 32 [ $\pm 8$ ] | 5 [ $\pm 30$ ]  | 1723 [ $\pm 49$ ] |

**Table A163. Prevalence cases in year [per 100000] for San Marino**

| Year       | Cancers    | CHD & Stroke | Osteoarthritis | Diabetes   | Hypertension |
|------------|------------|--------------|----------------|------------|--------------|
| Scenario 0 |            |              |                |            |              |
| 2010       | 2798 [±15] | 4968 [±20]   | 604 [±7]       | 8512 [±26] | 22430 [±42]  |
| 2020       | 2704 [±17] | 3812 [±20]   | 437 [±7]       | 6845 [±26] | 18625 [±44]  |
| 2030       | 2733 [±17] | 3519 [±20]   | 427 [±7]       | 6798 [±27] | 18722 [±46]  |
| Scenario 1 |            |              |                |            |              |
| 2010       | 2792 [±15] | 4955 [±20]   | 598 [±7]       | 8491 [±26] | 22446 [±42]  |
| 2020       | 2697 [±17] | 3773 [±20]   | 436 [±7]       | 6852 [±26] | 18483 [±43]  |
| 2030       | 2724 [±17] | 3491 [±20]   | 427 [±7]       | 6816 [±28] | 18406 [±45]  |
| Scenario 2 |            |              |                |            |              |
| 2010       | 2783 [±15] | 4948 [±20]   | 597 [±7]       | 8503 [±26] | 22416 [±42]  |
| 2020       | 2648 [±16] | 3678 [±19]   | 429 [±7]       | 6904 [±26] | 18103 [±43]  |
| 2030       | 2671 [±17] | 3402 [±19]   | 411 [±7]       | 6892 [±28] | 17587 [±44]  |

**Table A164. Prevalence cases avoided in year [per 100000] for San Marino**

| Year       | Cancers  | CHD & Stroke | Osteoarthritis | Diabetes  | Hypertension |
|------------|----------|--------------|----------------|-----------|--------------|
| Scenario 1 |          |              |                |           |              |
| 2010       | 6 [±21]  | 13 [±28]     | 6 [±10]        | 21 [±37]  | -16 [±60]    |
| 2020       | 7 [±21]  | 39 [±25]     | 1 [±8]         | -7 [±33]  | 142 [±54]    |
| 2030       | 9 [±21]  | 28 [±24]     | 0 [±8]         | -18 [±33] | 316 [±54]    |
| Scenario 2 |          |              |                |           |              |
| 2010       | 15 [±21] | 20 [±28]     | 7 [±10]        | 9 [±37]   | 14 [±60]     |
| 2020       | 56 [±21] | 134 [±24]    | 8 [±8]         | -59 [±33] | 522 [±54]    |
| 2030       | 62 [±21] | 117 [±24]    | 16 [±8]        | -94 [±33] | 1135 [±54]   |

## Serbia

**Table A165. Cumulative incidence cases from year 2010 [per 100000 of population in 2010] for Serbia**

| Year       | Cancers           | CHD & Stroke       | Osteoarthritis  | Diabetes          | Hypertension       |
|------------|-------------------|--------------------|-----------------|-------------------|--------------------|
| Scenario 0 |                   |                    |                 |                   |                    |
| 2010       | 133 [ $\pm 3$ ]   | 1183 [ $\pm 10$ ]  | 20 [ $\pm 1$ ]  | 197 [ $\pm 4$ ]   | 685 [ $\pm 7$ ]    |
| 2020       | 1510 [ $\pm 11$ ] | 11709 [ $\pm 31$ ] | 219 [ $\pm 4$ ] | 2274 [ $\pm 14$ ] | 8107 [ $\pm 26$ ]  |
| 2030       | 3009 [ $\pm 16$ ] | 22511 [ $\pm 45$ ] | 438 [ $\pm 6$ ] | 4657 [ $\pm 20$ ] | 16498 [ $\pm 38$ ] |
| Scenario 1 |                   |                    |                 |                   |                    |
| 2010       | 133 [ $\pm 3$ ]   | 1148 [ $\pm 10$ ]  | 19 [ $\pm 1$ ]  | 180 [ $\pm 4$ ]   | 668 [ $\pm 7$ ]    |
| 2020       | 1486 [ $\pm 11$ ] | 11481 [ $\pm 31$ ] | 220 [ $\pm 4$ ] | 2109 [ $\pm 13$ ] | 7831 [ $\pm 26$ ]  |
| 2030       | 2977 [ $\pm 16$ ] | 22100 [ $\pm 44$ ] | 439 [ $\pm 6$ ] | 4357 [ $\pm 20$ ] | 16001 [ $\pm 38$ ] |
| Scenario 2 |                   |                    |                 |                   |                    |
| 2010       | 129 [ $\pm 3$ ]   | 1085 [ $\pm 9$ ]   | 17 [ $\pm 1$ ]  | 141 [ $\pm 3$ ]   | 600 [ $\pm 7$ ]    |
| 2020       | 1438 [ $\pm 11$ ] | 10847 [ $\pm 30$ ] | 205 [ $\pm 4$ ] | 1678 [ $\pm 12$ ] | 7122 [ $\pm 25$ ]  |
| 2030       | 2884 [ $\pm 16$ ] | 20946 [ $\pm 43$ ] | 411 [ $\pm 6$ ] | 3553 [ $\pm 18$ ] | 14636 [ $\pm 36$ ] |

**Table A166. Cumulative incidence cases avoided from year 2010 [per 100000 of population in 2010] for Serbia**

| Year       | Cancers          | CHD & Stroke      | Osteoarthritis | Diabetes          | Hypertension      |
|------------|------------------|-------------------|----------------|-------------------|-------------------|
| Scenario 1 |                  |                   |                |                   |                   |
| 2010       | 0 [ $\pm 5$ ]    | 35 [ $\pm 14$ ]   | 1 [ $\pm 2$ ]  | 17 [ $\pm 5$ ]    | 17 [ $\pm 10$ ]   |
| 2020       | 24 [ $\pm 15$ ]  | 228 [ $\pm 43$ ]  | -1 [ $\pm 6$ ] | 165 [ $\pm 19$ ]  | 276 [ $\pm 36$ ]  |
| 2030       | 32 [ $\pm 22$ ]  | 411 [ $\pm 60$ ]  | -1 [ $\pm 8$ ] | 300 [ $\pm 27$ ]  | 497 [ $\pm 51$ ]  |
| Scenario 2 |                  |                   |                |                   |                   |
| 2010       | 4 [ $\pm 5$ ]    | 98 [ $\pm 13$ ]   | 3 [ $\pm 2$ ]  | 56 [ $\pm 5$ ]    | 85 [ $\pm 10$ ]   |
| 2020       | 72 [ $\pm 15$ ]  | 862 [ $\pm 42$ ]  | 14 [ $\pm 6$ ] | 596 [ $\pm 18$ ]  | 985 [ $\pm 35$ ]  |
| 2030       | 125 [ $\pm 22$ ] | 1565 [ $\pm 59$ ] | 27 [ $\pm 8$ ] | 1104 [ $\pm 26$ ] | 1862 [ $\pm 50$ ] |



**Table A167. Prevalence cases in year [per 100000] for Serbia**

| Year       | Cancers  | CHD & Stroke | Osteoarthritis | Diabetes   | Hypertension |
|------------|----------|--------------|----------------|------------|--------------|
| Scenario 0 |          |              |                |            |              |
| 2010       | 826 [±8] | 3258 [±16]   | 383 [±6]       | 2703 [±15] | 15734 [±35]  |
| 2020       | 922 [±9] | 3525 [±17]   | 360 [±6]       | 2304 [±14] | 16206 [±37]  |
| 2030       | 998 [±9] | 3748 [±18]   | 377 [±6]       | 2462 [±15] | 17467 [±40]  |
| Scenario 1 |          |              |                |            |              |
| 2010       | 828 [±8] | 3217 [±16]   | 385 [±6]       | 2690 [±15] | 15718 [±35]  |
| 2020       | 915 [±9] | 3493 [±17]   | 362 [±6]       | 2215 [±14] | 16023 [±37]  |
| 2030       | 986 [±9] | 3695 [±18]   | 378 [±6]       | 2342 [±14] | 17152 [±39]  |
| Scenario 2 |          |              |                |            |              |
| 2010       | 822 [±8] | 3153 [±16]   | 382 [±6]       | 2645 [±15] | 15637 [±35]  |
| 2020       | 891 [±9] | 3353 [±17]   | 353 [±5]       | 1976 [±13] | 15528 [±36]  |
| 2030       | 970 [±9] | 3564 [±18]   | 369 [±6]       | 2016 [±13] | 16295 [±38]  |

**Table A168. Prevalence cases avoided in year [per 100000] for Serbia**

| Year       | Cancers  | CHD & Stroke | Osteoarthritis | Diabetes  | Hypertension |
|------------|----------|--------------|----------------|-----------|--------------|
| Scenario 1 |          |              |                |           |              |
| 2010       | -2 [±12] | 41 [±23]     | -2 [±8]        | 13 [±21]  | 16 [±50]     |
| 2020       | 7 [±12]  | 32 [±24]     | -2 [±8]        | 89 [±19]  | 183 [±51]    |
| 2030       | 12 [±13] | 53 [±24]     | -1 [±8]        | 120 [±20] | 315 [±53]    |
| Scenario 2 |          |              |                |           |              |
| 2010       | 4 [±11]  | 105 [±23]    | 1 [±8]         | 58 [±21]  | 97 [±50]     |
| 2020       | 31 [±12] | 172 [±23]    | 7 [±8]         | 328 [±19] | 678 [±50]    |
| 2030       | 28 [±13] | 184 [±24]    | 8 [±8]         | 446 [±19] | 1172 [±52]   |

## Slovakia

**Table A169. Cumulative incidence cases from year 2010 [per 100000 of population in 2010] for Slovakia**

| Year       | Cancers    | CHD & Stroke | Osteoarthritis | Diabetes    | Hypertension |
|------------|------------|--------------|----------------|-------------|--------------|
| Scenario 0 |            |              |                |             |              |
| 2010       | 178 [±4]   | 1431 [±11]   | 16 [±1]        | 525 [±6]    | 708 [±8]     |
| 2020       | 2247 [±15] | 15302 [±38]  | 196 [±4]       | 6866 [±26]  | 9193 [±30]   |
| 2030       | 5156 [±25] | 33631 [±63]  | 456 [±7]       | 16371 [±44] | 21156 [±50]  |
| Scenario 1 |            |              |                |             |              |
| 2010       | 177 [±4]   | 1433 [±11]   | 16 [±1]        | 522 [±6]    | 710 [±8]     |
| 2020       | 2218 [±15] | 14950 [±38]  | 194 [±4]       | 6425 [±25]  | 8986 [±29]   |
| 2030       | 5078 [±24] | 32704 [±62]  | 444 [±7]       | 15274 [±42] | 20715 [±49]  |
| Scenario 2 |            |              |                |             |              |
| 2010       | 176 [±4]   | 1428 [±11]   | 16 [±1]        | 521 [±6]    | 703 [±8]     |
| 2020       | 2157 [±14] | 14068 [±36]  | 182 [±4]       | 5479 [±23]  | 8626 [±29]   |
| 2030       | 4911 [±24] | 30577 [±59]  | 419 [±7]       | 13002 [±39] | 19837 [±48]  |

**Table A170. Cumulative incidence cases avoided from year 2010 [per 100000 of population in 2010] Slovakia**

| Year       | Cancers   | CHD & Stroke | Osteoarthritis | Diabetes   | Hypertension |
|------------|-----------|--------------|----------------|------------|--------------|
| Scenario 1 |           |              |                |            |              |
| 2010       | 1 [±5]    | -2 [±15]     | 0 [±2]         | 3 [±9]     | -2 [±11]     |
| 2020       | 29 [±19]  | 352 [±49]    | 2 [±6]         | 441 [±33]  | 207 [±38]    |
| 2030       | 78 [±29]  | 927 [±73]    | 12 [±8]        | 1097 [±50] | 441 [±58]    |
| Scenario 2 |           |              |                |            |              |
| 2010       | 2 [±5]    | 3 [±15]      | 0 [±2]         | 4 [±9]     | 5 [±11]      |
| 2020       | 90 [±19]  | 1234 [±48]   | 14 [±5]        | 1387 [±31] | 567 [±38]    |
| 2030       | 245 [±28] | 3054 [±72]   | 37 [±8]        | 3369 [±48] | 1319 [±57]   |

**Table 171. Prevalence cases in year [per 100000] for Slovakia**

| Year       | Cancers    | CHD & Stroke | Osteoarthritis | Diabetes    | Hypertension |
|------------|------------|--------------|----------------|-------------|--------------|
| Scenario 0 |            |              |                |             |              |
| 2010       | 1175 [±10] | 2392 [±14]   | 351 [±5]       | 9343 [±27]  | 15583 [±35]  |
| 2020       | 1502 [±12] | 3076 [±17]   | 380 [±6]       | 8997 [±29]  | 17970 [±41]  |
| 2030       | 1811 [±15] | 3657 [±21]   | 469 [±7]       | 10870 [±36] | 22046 [±51]  |
| Scenario 1 |            |              |                |             |              |
| 2010       | 1173 [±10] | 2392 [±14]   | 351 [±5]       | 9329 [±27]  | 15567 [±35]  |
| 2020       | 1484 [±12] | 3013 [±17]   | 380 [±6]       | 8715 [±29]  | 17859 [±41]  |
| 2030       | 1791 [±14] | 3553 [±20]   | 462 [±7]       | 10314 [±35] | 21904 [±50]  |
| Scenario 2 |            |              |                |             |              |
| 2010       | 1176 [±10] | 2393 [±14]   | 347 [±5]       | 9327 [±27]  | 15554 [±35]  |
| 2020       | 1469 [±12] | 2866 [±16]   | 374 [±6]       | 8209 [±28]  | 17754 [±41]  |
| 2030       | 1751 [±14] | 3386 [±20]   | 452 [±7]       | 9338 [±33]  | 21688 [±50]  |

**Table A172. Prevalence cases avoided in year [per 100000] Slovakia**

| Year       | Cancers  | CHD & Stroke | Osteoarthritis | Diabetes   | Hypertension |
|------------|----------|--------------|----------------|------------|--------------|
| Scenario 1 |          |              |                |            |              |
| 2010       | 2 [±14]  | 0 [±20]      | 0 [±7]         | 14 [±39]   | 16 [±50]     |
| 2020       | 18 [±15] | 63 [±22]     | 0 [±8]         | 282 [±38]  | 111 [±54]    |
| 2030       | 20 [±17] | 104 [±24]    | 7 [±9]         | 556 [±41]  | 142 [±59]    |
| Scenario 2 |          |              |                |            |              |
| 2010       | -1 [±14] | -1 [±20]     | 4 [±7]         | 16 [±39]   | 29 [±50]     |
| 2020       | 33 [±15] | 210 [±22]    | 6 [±8]         | 788 [±37]  | 216 [±53]    |
| 2030       | 60 [±17] | 271 [±24]    | 17 [±9]        | 1532 [±40] | 358 [±59]    |

## Slovenia

**Table A173. Cumulative incidence cases in year 2010 [per 100,000 of population in 2010] for Slovenia**

| Year       | Cancers    | CHD & Stroke | Osteoarthritis | Diabetes   | Hypertension |
|------------|------------|--------------|----------------|------------|--------------|
| Scenario 0 |            |              |                |            |              |
| 2010       | 192 [+4]   | 1013 [+9]    | 18 [+1]        | 248 [+4]   | 729 [+8]     |
| 2020       | 2239 [+14] | 10422 [+30]  | 209 [+4]       | 2742 [+15] | 8183 [+26]   |
| 2030       | 4602 [+21] | 20833 [+44]  | 420 [+6]       | 5444 [+22] | 16306 [+39]  |
| Scenario 1 |            |              |                |            |              |
| 2010       | 194 [+4]   | 993 [+9]     | 18 [+1]        | 232 [+4]   | 703 [+8]     |
| 2020       | 2213 [+14] | 10261 [+29]  | 204 [+4]       | 2560 [+15] | 7953 [+26]   |
| 2030       | 4562 [+20] | 20507 [+43]  | 414 [+6]       | 5064 [+22] | 15870 [+38]  |
| Scenario 2 |            |              |                |            |              |
| 2010       | 188 [+4]   | 939 [+9]     | 17 [+1]        | 183 [+4]   | 632 [+7]     |
| 2020       | 2171 [+14] | 9806 [+29]   | 191 [+4]       | 2054 [+13] | 7286 [+25]   |
| 2030       | 4485 [+20] | 19557 [+42]  | 386 [+6]       | 4104 [+19] | 14574 [+36]  |

**Table A174. Cumulative incidence cases avoided in year [per 100,000 of population in 2010] Slovenia**

| Year       | Cancers   | CHD & Stroke | Osteoarthritis | Diabetes   | Hypertension |
|------------|-----------|--------------|----------------|------------|--------------|
| Scenario 1 |           |              |                |            |              |
| 2010       | -2 [+6]   | 20 [+13]     | 0 [+2]         | 16 [+6]    | 26 [+11]     |
| 2020       | 26 [+19]  | 161 [+41]    | 5 [+6]         | 182 [+21]  | 230 [+36]    |
| 2030       | 40 [+27]  | 326 [+58]    | 6 [+8]         | 380 [+29]  | 436 [+51]    |
| Scenario 2 |           |              |                |            |              |
| 2010       | 4 [+6]    | 74 [+12]     | 1 [+2]         | 65 [+6]    | 97 [+10]     |
| 2020       | 68 [+19]  | 616 [+40]    | 18 [+6]        | 688 [+20]  | 897 [+35]    |
| 2030       | 117 [+27] | 1276 [+57]   | 34 [+8]        | 1340 [+28] | 1732 [+50]   |

**Table A175. Prevalence cases in year [per 100,000] for Slovenia**

| Year       | Cancers    | CHD & Stroke | Osteoarthritis | Diabetes   | Hypertension |
|------------|------------|--------------|----------------|------------|--------------|
| Scenario 0 |            |              |                |            |              |
| 2010       | 1407 [+11] | 2454 [+14]   | 385 [+6]       | 7051 [+24] | 17563 [+37]  |
| 2020       | 1585 [+12] | 2907 [+16]   | 383 [+6]       | 6826 [+24] | 18482 [+40]  |
| 2030       | 1743 [+13] | 3217 [+17]   | 406 [+6]       | 6983 [+25] | 19508 [+42]  |
| Scenario 1 |            |              |                |            |              |
| 2010       | 1408 [+11] | 2431 [+14]   | 390 [+6]       | 7024 [+24] | 17561 [+37]  |
| 2020       | 1578 [+12] | 2886 [+16]   | 386 [+6]       | 6672 [+24] | 18338 [+39]  |
| 2030       | 1742 [+13] | 3182 [+17]   | 408 [+6]       | 6705 [+25] | 19221 [+42]  |
| Scenario 2 |            |              |                |            |              |
| 2010       | 1400 [+11] | 2374 [+14]   | 389 [+6]       | 6978 [+24] | 17480 [+37]  |
| 2020       | 1556 [+11] | 2792 [+15]   | 377 [+6]       | 6286 [+23] | 17835 [+39]  |
| 2030       | 1719 [+13] | 3041 [+17]   | 391 [+6]       | 6052 [+23] | 18381 [+41]  |

**Table A176. Prevalence cases avoided in year [per 100,000] Slovenia**

| Year       | Cancers  | CHD & Stroke | Osteoarthritis | Diabetes  | Hypertension |
|------------|----------|--------------|----------------|-----------|--------------|
| Scenario 1 |          |              |                |           |              |
| 2010       | -1 [+15] | 23 [+20]     | -5 [+8]        | 27 [+34]  | 2 [+53]      |
| 2020       | 7 [+16]  | 21 [+22]     | -3 [+8]        | 154 [+33] | 144 [+54]    |
| 2030       | 1 [+17]  | 35 [+23]     | -2 [+8]        | 278 [+33] | 287 [+56]    |
| Scenario 2 |          |              |                |           |              |
| 2010       | 7 [+15]  | 80 [+20]     | -4 [+8]        | 73 [+34]  | 83 [+53]     |
| 2020       | 29 [+16] | 115 [+21]    | 6 [+8]         | 540 [+32] | 647 [+54]    |
| 2030       | 24 [+17] | 176 [+22]    | 15 [+8]        | 931 [+32] | 1127 [+55]   |

## Spain

**Table A177. Cumulative incidence cases from year 2010 [per 100000 of population in 2010] for Spain**

| Year       | Cancers    | CHD & Stroke | Diabetes   | Hypertension | Osteoarthritis |
|------------|------------|--------------|------------|--------------|----------------|
| Scenario 0 |            |              |            |              |                |
| 2010       | 180 [±4]   | 412 [±6]     | 203 [±4]   | 599 [±7]     | 17 [±1]        |
| 2020       | 2103 [±13] | 4296 [±19]   | 2503 [±14] | 6873 [±23]   | 184 [±4]       |
| 2030       | 4399 [±19] | 8737 [±27]   | 5402 [±21] | 14107 [±34]  | 374 [±6]       |
| Scenario 1 |            |              |            |              |                |
| 2010       | 180 [±4]   | 414 [±6]     | 203 [±4]   | 597 [±7]     | 16 [±1]        |
| 2020       | 2070 [±13] | 4179 [±18]   | 2338 [±14] | 6806 [±23]   | 184 [±4]       |
| 2030       | 4313 [±19] | 8483 [±27]   | 5031 [±20] | 13954 [±34]  | 370 [±6]       |
| Scenario 2 |            |              |            |              |                |
| 2010       | 180 [±4]   | 414 [±6]     | 209 [±4]   | 598 [±7]     | 16 [±1]        |
| 2020       | 2004 [±13] | 3925 [±18]   | 1957 [±13] | 6573 [±23]   | 180 [±4]       |
| 2030       | 4171 [±19] | 7934 [±26]   | 4250 [±19] | 13493 [±33]  | 364 [±5]       |

**Table A178. Cumulative incidence cases avoided from year 2010 [per 100000 of population in 2010] Spain**

| Year       | Cancers   | CHD & Stroke | Diabetes   | Hypertension | Osteoarthritis |
|------------|-----------|--------------|------------|--------------|----------------|
| Scenario 1 |           |              |            |              |                |
| 2010       | 0 [±5]    | 0 [±8]       | 0 [±6]     | 2 [±10]      | 1 [±2]         |
| 2020       | 33 [±18]  | 117 [±26]    | 165 [±20]  | 67 [±33]     | 0 [±5]         |
| 2030       | 86 [±26]  | 254 [±37]    | 371 [±29]  | 153 [±47]    | 4 [±8]         |
| Scenario 2 |           |              |            |              |                |
| 2010       | 0 [±5]    | -2 [±8]      | -6 [±6]    | 1 [±10]      | 1 [±2]         |
| 2020       | 99 [±18]  | 371 [±26]    | 546 [±19]  | 300 [±33]    | 4 [±5]         |
| 2030       | 228 [±26] | 803 [±37]    | 1152 [±28] | 614 [±47]    | 10 [±8]        |

**Table A179. Prevalence cases in year [per 100000] for Spain**

| Year       | Cancers  | CHD & Stroke | Diabetes   | Hypertension | Osteoarthritis |
|------------|----------|--------------|------------|--------------|----------------|
| Scenario 0 |          |              |            |              |                |
| 2010       | 650 [±7] | 585 [±7]     | 4383 [±19] | 14819 [±34]  | 403 [±6]       |
| 2020       | 830 [±8] | 880 [±8]     | 4389 [±19] | 15999 [±36]  | 428 [±6]       |
| 2030       | 995 [±9] | 1030 [±9]    | 5105 [±21] | 17950 [±39]  | 476 [±6]       |
| Scenario 1 |          |              |            |              |                |
| 2010       | 654 [±7] | 587 [±7]     | 4380 [±19] | 14811 [±34]  | 401 [±6]       |
| 2020       | 814 [±8] | 842 [±8]     | 4256 [±18] | 15960 [±36]  | 428 [±6]       |
| 2030       | 968 [±9] | 995 [±9]     | 4842 [±20] | 17906 [±39]  | 474 [±6]       |
| Scenario 2 |          |              |            |              |                |
| 2010       | 648 [±7] | 586 [±7]     | 4393 [±19] | 14795 [±34]  | 403 [±6]       |
| 2020       | 801 [±8] | 791 [±8]     | 3993 [±18] | 15807 [±36]  | 426 [±6]       |
| 2030       | 947 [±9] | 924 [±9]     | 4366 [±19] | 17645 [±38]  | 469 [±6]       |

**Table A180. Prevalence cases avoided in year [per 100000] Spain**

| Year       | Cancers  | CHD & Stroke | Diabetes  | Hypertension | Osteoarthritis |
|------------|----------|--------------|-----------|--------------|----------------|
| Scenario 1 |          |              |           |              |                |
| 2010       | 0 [±10]  | 0 [±10]      | 3 [±26]   | 8 [±49]      | 2 [±8]         |
| 2020       | 16 [±11] | 38 [±12]     | 133 [±26] | 39 [±51]     | 0 [±8]         |
| 2030       | 27 [±13] | 35 [±13]     | 263 [±28] | 44 [±54]     | 2 [±9]         |
| Scenario 2 |          |              |           |              |                |
| 2010       | 2 [±10]  | -1 [±10]     | -10 [±26] | 24 [±49]     | 0 [±8]         |
| 2020       | 29 [±11] | 89 [±12]     | 396 [±26] | 192 [±50]    | 2 [±8]         |
| 2030       | 48 [±12] | 106 [±13]    | 739 [±28] | 305 [±53]    | 7 [±9]         |

## Sweden

**Table A181. Cumulative incidence cases from year 2010 [per 100000 of population in 2010] for Sweden**

| Year       | Cancers    | CHD & Stroke | Osteoarthritis | Diabetes   | Hypertension |
|------------|------------|--------------|----------------|------------|--------------|
| Scenario 0 |            |              |                |            |              |
| 2010       | 190 [±4]   | 926 [±9]     | 15 [±1]        | 90 [±3]    | 687 [±7]     |
| 2020       | 2437 [±15] | 10894 [±32]  | 216 [±4]       | 1190 [±10] | 8822 [±28]   |
| 2030       | 5512 [±24] | 24901 [±52]  | 495 [±7]       | 2862 [±18] | 20527 [±47]  |
| Scenario 1 |            |              |                |            |              |
| 2010       | 195 [±4]   | 926 [±9]     | 16 [±1]        | 89 [±3]    | 682 [±7]     |
| 2020       | 2425 [±15] | 10742 [±31]  | 209 [±4]       | 1103 [±10] | 8500 [±28]   |
| 2030       | 5444 [±24] | 24514 [±51]  | 482 [±7]       | 2660 [±17] | 19779 [±46]  |
| Scenario 2 |            |              |                |            |              |
| 2010       | 188 [±4]   | 916 [±9]     | 16 [±1]        | 91 [±3]    | 692 [±7]     |
| 2020       | 2352 [±15] | 10283 [±31]  | 195 [±4]       | 934 [±9]   | 7934 [±27]   |
| 2030       | 5281 [±24] | 23450 [±50]  | 454 [±7]       | 2252 [±16] | 18423 [±44]  |

**Table A182. Cumulative incidence cases avoided from year 2010 [per 100000 of population in 2010] Sweden**

| Year       | Cancers   | CHD & Stroke | Osteoarthritis | Diabetes  | Hypertension |
|------------|-----------|--------------|----------------|-----------|--------------|
| Scenario 1 |           |              |                |           |              |
| 2010       | 0 [±6]    | 0 [±12]      | 0 [±2]         | 1 [±4]    | 5 [±10]      |
| 2020       | 12 [±20]  | 152 [±42]    | 7 [±6]         | 87 [±14]  | 322 [±37]    |
| 2030       | 68 [±30]  | 387 [±63]    | 13 [±9]        | 202 [±21] | 748 [±57]    |
| Scenario 2 |           |              |                |           |              |
| 2010       | 2 [±5]    | 10 [±12]     | 0 [±2]         | 0 [±4]    | 0 [±11]      |
| 2020       | 85 [±20]  | 611 [±41]    | 21 [±6]        | 256 [±13] | 888 [±37]    |
| 2030       | 231 [±29] | 1451 [±62]   | 41 [±9]        | 610 [±20] | 2104 [±56]   |



**Table A183. Prevalence cases in year [per 100000] for Sweden**

| Year       | Cancers    | CHD & Stroke | Osteoarthritis | Diabetes   | Hypertension |
|------------|------------|--------------|----------------|------------|--------------|
| Scenario 0 |            |              |                |            |              |
| 2010       | 2861 [±15] | 2569 [±14]   | 405 [±6]       | 1195 [±10] | 17095 [±37]  |
| 2020       | 3443 [±18] | 3741 [±18]   | 476 [±7]       | 1380 [±11] | 20889 [±44]  |
| 2030       | 4130 [±21] | 4738 [±23]   | 579 [±8]       | 1784 [±14] | 25845 [±53]  |
| Scenario 1 |            |              |                |            |              |
| 2010       | 2874 [±15] | 2571 [±14]   | 407 [±6]       | 1203 [±10] | 17095 [±37]  |
| 2020       | 3441 [±18] | 3700 [±18]   | 472 [±7]       | 1331 [±11] | 20637 [±43]  |
| 2030       | 4092 [±21] | 4658 [±22]   | 570 [±8]       | 1682 [±13] | 25299 [±52]  |
| Scenario 2 |            |              |                |            |              |
| 2010       | 2847 [±15] | 2557 [±14]   | 407 [±6]       | 1193 [±10] | 17097 [±37]  |
| 2020       | 3381 [±18] | 3560 [±18]   | 460 [±6]       | 1215 [±11] | 20202 [±43]  |
| 2030       | 4045 [±21] | 4497 [±22]   | 553 [±8]       | 1486 [±13] | 24377 [±51]  |

**Table A184. Prevalence cases avoided in year [per 100000] Sweden**

| Year       | Cancers  | CHD & Stroke | Osteoarthritis | Diabetes  | Hypertension |
|------------|----------|--------------|----------------|-----------|--------------|
| Scenario 1 |          |              |                |           |              |
| 2010       | 0 [±21]  | 02 [±20]     | 0 [±8]         | 0 [±14]   | 0 [±52]      |
| 2020       | 2 [±23]  | 41 [±24]     | 4 [±9]         | 49 [±15]  | 252 [±58]    |
| 2030       | 38 [±26] | 80 [±27]     | 9 [±10]        | 102 [±17] | 546 [±64]    |
| Scenario 2 |          |              |                |           |              |
| 2010       | 14 [±21] | 12 [±20]     | 0 [±8]         | 2 [±14]   | 0 [±52]      |
| 2020       | 62 [±23] | 181 [±24]    | 16 [±9]        | 165 [±14] | 687 [±57]    |
| 2030       | 85 [±26] | 241 [±27]    | 26 [±10]       | 298 [±16] | 1468 [±63]   |

## Switzerland

**Table A185. Cumulative incidence cases from year 2010 [per 100000 of population in 2010] for Switzerland**

| Year       | Cancers    | CHD & Stroke | Diabetes   | Hypertension | Osteoarthritis |
|------------|------------|--------------|------------|--------------|----------------|
| Scenario 0 |            |              |            |              |                |
| 2010       | 202 [±4]   | 542 [±7]     | 59 [±2]    | 628 [±7]     | 22 [±1]        |
| 2020       | 2435 [±14] | 6484 [±23]   | 679 [±7]   | 7207 [±24]   | 257 [±5]       |
| 2030       | 5023 [±21] | 13941 [±34]  | 1376 [±11] | 14429 [±35]  | 526 [±7]       |
| Scenario 1 |            |              |            |              |                |
| 2010       | 204 [±4]   | 541 [±7]     | 59 [±2]    | 629 [±7]     | 22 [±1]        |
| 2020       | 2404 [±14] | 6418 [±23]   | 627 [±7]   | 6983 [±24]   | 253 [±5]       |
| 2030       | 4953 [±20] | 13745 [±34]  | 1264 [±10] | 13997 [±34]  | 522 [±7]       |
| Scenario 2 |            |              |            |              |                |
| 2010       | 204 [±4]   | 544 [±7]     | 57 [±2]    | 628 [±7]     | 21 [±1]        |
| 2020       | 2348 [±14] | 6152 [±22]   | 519 [±6]   | 6548 [±23]   | 237 [±4]       |
| 2030       | 4819 [±20] | 13183 [±33]  | 1054 [±9]  | 13119 [±33]  | 490 [±6]       |

**Table A186. Cumulative incidence cases avoided from year 2010 [per 100000 of population in 2010] for Switzerland**

| Year       | Cancers   | CHD & Stroke | Osteoarthritis | Diabetes   | Hypertension |
|------------|-----------|--------------|----------------|------------|--------------|
| Scenario 1 |           |              |                |            |              |
| 2010       | -2 [±6]   | 1 [±9]       | 0 [±3]         | -1 [±10]   | 0 [±2]       |
| 2020       | 31 [±20]  | 66 [±32]     | 52 [±10]       | 224 [±34]  | 4 [±6]       |
| 2030       | 70 [±28]  | 196 [±47]    | 112 [±15]      | 432 [±48]  | 4 [±9]       |
| Scenario 2 |           |              |                |            |              |
| 2010       | -2 [±6]   | -2 [±9]      | 2 [±3]         | 0 [±10]    | 1 [±2]       |
| 2020       | 87 [±20]  | 332 [±32]    | 160 [±10]      | 659 [±33]  | 20 [±6]      |
| 2030       | 204 [±28] | 758 [±47]    | 322 [±14]      | 1310 [±47] | 36 [±9]      |

**Table A187. Prevalence cases in year [per 100000] for Switzerland**

| Year       | Cancers    | CHD & Stroke | Diabetes   | Hypertension | Osteoarthritis |
|------------|------------|--------------|------------|--------------|----------------|
| Scenario 0 |            |              |            |              |                |
| 2010       | 1560 [±11] | 3217 [±16]   | 1066 [±9]  | 13580 [±33]  | 520 [±6]       |
| 2020       | 1998 [±13] | 4180 [±18]   | 1422 [±11] | 16507 [±36]  | 584 [±7]       |
| 2030       | 2273 [±14] | 5088 [±21]   | 1672 [±12] | 18714 [±40]  | 661 [±7]       |
| Scenario 1 |            |              |            |              |                |
| 2010       | 1566 [±11] | 3220 [±16]   | 1064 [±9]  | 13564 [±33]  | 520 [±6]       |
| 2020       | 1977 [±13] | 4145 [±18]   | 1373 [±11] | 16299 [±36]  | 580 [±7]       |
| 2030       | 2241 [±14] | 5000 [±20]   | 1578 [±12] | 18370 [±39]  | 658 [±7]       |
| Scenario 2 |            |              |            |              |                |
| 2010       | 1567 [±11] | 3209 [±16]   | 1068 [±9]  | 13600 [±33]  | 519 [±6]       |
| 2020       | 1945 [±13] | 3975 [±18]   | 1281 [±10] | 15935 [±36]  | 568 [±7]       |
| 2030       | 2198 [±14] | 4771 [±20]   | 1419 [±11] | 17708 [±38]  | 635 [±7]       |

**Table A188. Prevalence cases avoided in year [per 100000] for Switzerland**

| Year       | Cancers  | CHD & Stroke | Osteoarthritis | Diabetes   | Hypertension |
|------------|----------|--------------|----------------|------------|--------------|
| Scenario 1 |          |              |                |            |              |
| 2010       | -6 [±16] | -3 [±23]     | 2 [±13]        | 16 [±47]   | 0 [±9]       |
| 2020       | 21 [±18] | 35 [±26]     | 49 [±15]       | 208 [±51]  | 4 [±10]      |
| 2030       | 32 [±19] | 88 [±28]     | 94 [±16]       | 344 [±54]  | 3 [±10]      |
| Scenario 2 |          |              |                |            |              |
| 2010       | -7 [±16] | 8 [±23]      | -2 [±13]       | -20 [±47]  | 1 [±9]       |
| 2020       | 53 [±18] | 205 [±26]    | 141 [±15]      | 572 [±51]  | 16 [±10]     |
| 2030       | 75 [±19] | 317 [±28]    | 253 [±16]      | 1006 [±54] | 26 [±10]     |

## Tajikistan

**Table A189. Cumulative incidence cases from year 2010 [per 100000 of population in 2010] for Tajikistan**

| Year       | Cancers  | CHD & Stroke | Osteoarthritis | Diabetes   | Hypertension |
|------------|----------|--------------|----------------|------------|--------------|
| Scenario 0 |          |              |                |            |              |
| 2010       | 47 [±2]  | 2137 [±13]   | 8 [±1]         | 615 [±7]   | 2171 [±13]   |
| 2020       | 460 [±6] | 12097 [±29]  | 81 [±2]        | 5290 [±19] | 19237 [±37]  |
| 2030       | 807 [±7] | 19104 [±34]  | 146 [±3]       | 9953 [±24] | 33320 [±44]  |
| Scenario 1 |          |              |                |            |              |
| 2010       | 46 [±2]  | 2151 [±13]   | 8 [±1]         | 621 [±7]   | 2171 [±13]   |
| 2020       | 456 [±6] | 12019 [±29]  | 81 [±2]        | 5135 [±19] | 19133 [±37]  |
| 2030       | 798 [±7] | 18922 [±33]  | 145 [±3]       | 9648 [±24] | 33078 [±44]  |
| Scenario 2 |          |              |                |            |              |
| 2010       | 43 [±2]  | 2136 [±13]   | 8 [±1]         | 620 [±7]   | 2174 [±13]   |
| 2020       | 447 [±6] | 11732 [±29]  | 79 [±2]        | 4721 [±18] | 18786 [±36]  |
| 2030       | 783 [±7] | 18457 [±33]  | 144 [±3]       | 8839 [±23] | 32583 [±44]  |

**Table A190. Prevalence cases avoided in year [per 100000] for Tajikistan**

| Year       | Cancers | CHD & Stroke | Osteoarthritis | Diabetes  | Hypertension |
|------------|---------|--------------|----------------|-----------|--------------|
| Scenario 1 |         |              |                |           |              |
| 2010       | 3 [±6]  | 1 [±30]      | 10 [±35]       | -12 [±80] | 4 [±5]       |
| 2020       | 3 [±6]  | 32 [±28]     | 124 [±35]      | 69 [±83]  | 3 [±4]       |
| 2030       | 2 [±7]  | 35 [±28]     | 201 [±37]      | 152 [±85] | 2 [±4]       |
| Scenario 2 |         |              |                |           |              |
| 2010       | 1 [±6]  | 1 [±30]      | 5 [±35]        | -19 [±80] | 4 [±5]       |
| 2020       | 2 [±6]  | 96 [±28]     | 423 [±34]      | 297 [±83] | 2 [±4]       |
| 2030       | 6 [±7]  | 125 [±28]    | 770 [±37]      | 450 [±85] | 1 [±4]       |

**Table A191. Prevalence cases in year [per 100000] for Tajikistan**

| Year       | Cancers  | CHD & Stroke | Osteoarthritis | Diabetes   | Hypertension |
|------------|----------|--------------|----------------|------------|--------------|
| Scenario 0 |          |              |                |            |              |
| 2010       | 244 [±4] | 5726 [±21]   | 141 [±3]       | 7630 [±25] | 40074 [±57]  |
| 2020       | 257 [±4] | 4814 [±18]   | 112 [±3]       | 7537 [±23] | 43011 [±55]  |
| 2030       | 271 [±4] | 4872 [±17]   | 121 [±3]       | 8724 [±23] | 45533 [±52]  |
| Scenario 1 |          |              |                |            |              |
| 2010       | 241 [±4] | 5725 [±21]   | 137 [±3]       | 7620 [±25] | 40086 [±57]  |
| 2020       | 254 [±4] | 4782 [±18]   | 109 [±3]       | 7413 [±23] | 42942 [±55]  |
| 2030       | 269 [±4] | 4837 [±17]   | 119 [±3]       | 8523 [±22] | 45381 [±52]  |
| Scenario 2 |          |              |                |            |              |
| 2010       | 243 [±4] | 5725 [±21]   | 137 [±3]       | 7625 [±25] | 40093 [±57]  |
| 2020       | 255 [±4] | 4718 [±18]   | 110 [±3]       | 7114 [±22] | 42714 [±55]  |
| 2030       | 265 [±4] | 4747 [±17]   | 120 [±3]       | 7954 [±22] | 45083 [±52]  |

**Table A192. Cumulative incidence cases avoided from year 2010 [per 100000 of population in 2010] for Tajikistan**

| Year       | Cancers  | CHD & Stroke | Osteoarthritis | Diabetes  | Hypertension |
|------------|----------|--------------|----------------|-----------|--------------|
| Scenario 1 |          |              |                |           |              |
| 2010       | 1 [±3]   | -14 [±19]    | -6 [±10]       | 0 [±19]   | 0 [±1]       |
| 2020       | 4 [±9]   | 78 [±44]     | 155 [±29]      | 104 [±55] | 0 [±4]       |
| 2030       | 9 [±11]  | 182 [±55]    | 305 [±40]      | 242 [±73] | 1 [±5]       |
| Scenario 2 |          |              |                |           |              |
| 2010       | 4 [±3]   | 1 [±18]      | -5 [±10]       | -3 [±19]  | 0 [±1]       |
| 2020       | 13 [±9]  | 365 [±44]    | 569 [±28]      | 451 [±55] | 2 [±4]       |
| 2030       | 24 [±11] | 647 [±55]    | 1114 [±39]     | 737 [±73] | 2 [±5]       |

## Turkey

**Table A193. Cumulative incidence cases from year 2010 [per 100000 of population in 2010] for Turkey**

| Year       | Cancers  | CHD & Stroke | Osteoarthritis | Diabetes   | Hypertension |
|------------|----------|--------------|----------------|------------|--------------|
| Scenario 0 |          |              |                |            |              |
| 2010       | 38 [±2]  | 2602 [±14]   | 12 [±1]        | 179 [±4]   | 1353 [±10]   |
| 2020       | 396 [±6] | 19989 [±40]  | 129 [±3]       | 2042 [±13] | 14697 [±35]  |
| 2030       | 719 [±8] | 35917 [±54]  | 237 [±4]       | 4138 [±18] | 28836 [±49]  |
| Scenario 1 |          |              |                |            |              |
| 2010       | 38 [±2]  | 2582 [±14]   | 12 [±1]        | 176 [±4]   | 1346 [±10]   |
| 2020       | 391 [±6] | 19611 [±40]  | 127 [±3]       | 1893 [±12] | 14343 [±34]  |
| 2030       | 716 [±8] | 35202 [±54]  | 235 [±4]       | 3836 [±18] | 28157 [±48]  |
| Scenario 2 |          |              |                |            |              |
| 2010       | 39 [±2]  | 2573 [±14]   | 12 [±1]        | 178 [±4]   | 1345 [±10]   |
| 2020       | 379 [±6] | 18604 [±39]  | 119 [±3]       | 1558 [±11] | 13340 [±33]  |
| 2030       | 698 [±8] | 33357 [±52]  | 222 [±4]       | 3195 [±16] | 26218 [±46]  |

**Table A194. Cumulative incidence cases avoided from year 2010 [per 100000 of population in 2010] for Turkey**

| Year       | Cancers  | CHD & Stroke | Osteoarthritis | Diabetes  | Hypertension |
|------------|----------|--------------|----------------|-----------|--------------|
| Scenario 1 |          |              |                |           |              |
| 2010       | 0 [±2]   | 20 [±20]     | 0 [±1]         | 3 [±5]    | 7 [±15]      |
| 2020       | 5 [±8]   | 378 [±56]    | 2 [±5]         | 149 [±18] | 354 [±48]    |
| 2030       | 3 [±11]  | 715 [±75]    | 2 [±6]         | 302 [±25] | 679 [±68]    |
| Scenario 2 |          |              |                |           |              |
| 2010       | -1 [±2]  | 29 [±20]     | 0 [±1]         | 1 [±5]    | 8 [±15]      |
| 2020       | 17 [±8]  | 1385 [±56]   | 10 [±4]        | 484 [±17] | 1357 [±47]   |
| 2030       | 21 [±11] | 2560 [±74]   | 15 [±6]        | 943 [±24] | 2618 [±66]   |

**Table A195. Prevalence cases in year [per 100000] for Turkey**

| Year       | Cancers  | CHD & Stroke | Osteoarthritis | Diabetes   | Hypertension |
|------------|----------|--------------|----------------|------------|--------------|
| Scenario 0 |          |              |                |            |              |
| 2010       | 221 [±4] | 3632 [±17]   | 212 [±4]       | 3060 [±16] | 28282 [±48]  |
| 2020       | 210 [±4] | 3422 [±17]   | 172 [±4]       | 1664 [±12] | 26775 [±47]  |
| 2030       | 209 [±4] | 3473 [±17]   | 167 [±4]       | 1772 [±12] | 27525 [±48]  |
| Scenario 1 |          |              |                |            |              |
| 2010       | 218 [±4] | 3608 [±17]   | 211 [±4]       | 3063 [±16] | 28250 [±48]  |
| 2020       | 211 [±4] | 3372 [±17]   | 172 [±4]       | 1604 [±11] | 26594 [±46]  |
| 2030       | 211 [±4] | 3408 [±17]   | 171 [±4]       | 1681 [±12] | 27252 [±47]  |
| Scenario 2 |          |              |                |            |              |
| 2010       | 220 [±4] | 3592 [±17]   | 213 [±4]       | 3078 [±16] | 28255 [±48]  |
| 2020       | 210 [±4] | 3227 [±16]   | 169 [±4]       | 1457 [±11] | 26139 [±46]  |
| 2030       | 210 [±4] | 3261 [±16]   | 165 [±4]       | 1498 [±11] | 26409 [±46]  |

**Table A196. Prevalence cases avoided in year [per 100000] for Turkey**

| Year       | Cancers | CHD & Stroke | Osteoarthritis | Diabetes  | Hypertension |
|------------|---------|--------------|----------------|-----------|--------------|
| Scenario 1 |         |              |                |           |              |
| 2010       | 3 [±6]  | 24 [±24]     | 1 [±6]         | -3 [±22]  | 32 [±67]     |
| 2020       | -1 [±6] | 50 [±23]     | 0 [±5]         | 60 [±16]  | 181 [±65]    |
| 2030       | -2 [±6] | 65 [±23]     | -4 [±5]        | 91 [±17]  | 273 [±66]    |
| Scenario 2 |         |              |                |           |              |
| 2010       | 1 [±6]  | 40 [±24]     | -1 [±6]        | -18 [±22] | 27 [±67]     |
| 2020       | 0 [±6]  | 195 [±23]    | 3 [±5]         | 207 [±16] | 636 [±65]    |
| 2030       | -1 [±6] | 212 [±23]    | 2 [±5]         | 274 [±16] | 1116 [±66]   |

## Turkmenistan

**Table A197. Cumulative incidence cases avoided from year 2010 [per 100000 of population in 2010] for Turkmenistan**

| Year       | Cancers  | CHD & Stroke | Osteoarthritis | Diabetes   | Hypertension |
|------------|----------|--------------|----------------|------------|--------------|
| Scenario 1 |          |              |                |            |              |
| 2010       | 0 [±3]   | -2 [±16]     | 0 [±1]         | 4 [±6]     | -6 [±9]      |
| 2020       | 8 [±11]  | 160 [±45]    | 4 [±4]         | 163 [±20]  | 127 [±29]    |
| 2030       | 16 [±15] | 301 [±60]    | 4 [±6]         | 343 [±28]  | 283 [±41]    |
| Scenario 2 |          |              |                |            |              |
| 2010       | -2 [±3]  | 1 [±16]      | 0 [±1]         | 1 [±6]     | -6 [±9]      |
| 2020       | 16 [±11] | 457 [±45]    | 9 [±4]         | 490 [±20]  | 397 [±29]    |
| 2030       | 47 [±15] | 864 [±60]    | 14 [±6]        | 1025 [±27] | 897 [±41]    |

**Table A198. Cumulative incidence cases from year 2010 [per 100000 of population in 2010] for Turkmenistan**

| Year       | Cancers    | CHD & Stroke | Osteoarthritis | Diabetes   | Hypertension |
|------------|------------|--------------|----------------|------------|--------------|
| Scenario 0 |            |              |                |            |              |
| 2010       | 66 [±2]    | 1622 [±11]   | 10 [±1]        | 229 [±4]   | 490 [±6]     |
| 2020       | 726 [±7]   | 12865 [±31]  | 111 [±3]       | 2626 [±14] | 5498 [±20]   |
| 2030       | 1387 [±10] | 22975 [±40]  | 215 [±4]       | 5203 [±19] | 10810 [±28]  |
| Scenario 1 |            |              |                |            |              |
| 2010       | 66 [±2]    | 1624 [±11]   | 10 [±1]        | 225 [±4]   | 496 [±6]     |
| 2020       | 718 [±7]   | 12705 [±31]  | 107 [±3]       | 2463 [±14] | 5371 [±20]   |
| 2030       | 1371 [±10] | 22674 [±40]  | 211 [±4]       | 4860 [±19] | 10527 [±27]  |
| Scenario 2 |            |              |                |            |              |
| 2010       | 68 [±2]    | 1621 [±11]   | 10 [±1]        | 228 [±4]   | 496 [±6]     |
| 2020       | 710 [±7]   | 12408 [±31]  | 102 [±3]       | 2136 [±13] | 5101 [±20]   |
| 2030       | 1340 [±10] | 22111 [±40]  | 201 [±4]       | 4178 [±17] | 9913 [±26]   |



**Table A199. Prevalence cases in year [per 100000] for Turkmenistan**

| Year       | Cancers  | CHD & Stroke | Osteoarthritis | Diabetes   | Hypertension |
|------------|----------|--------------|----------------|------------|--------------|
| Scenario 0 |          |              |                |            |              |
| 2010       | 252 [±4] | 4424 [±19]   | 174 [±4]       | 3807 [±17] | 11857 [±31]  |
| 2020       | 328 [±5] | 4863 [±19]   | 164 [±4]       | 4333 [±18] | 13101 [±31]  |
| 2030       | 357 [±5] | 5309 [±19]   | 182 [±4]       | 5020 [±19] | 14446 [±32]  |
| Scenario 1 |          |              |                |            |              |
| 2010       | 252 [±4] | 4419 [±19]   | 170 [±4]       | 3808 [±17] | 11868 [±31]  |
| 2020       | 324 [±5] | 4825 [±19]   | 161 [±3]       | 4210 [±18] | 13005 [±31]  |
| 2030       | 349 [±5] | 5239 [±19]   | 180 [±4]       | 4785 [±18] | 14236 [±32]  |
| Scenario 2 |          |              |                |            |              |
| 2010       | 254 [±5] | 4414 [±19]   | 176 [±4]       | 3808 [±17] | 11861 [±31]  |
| 2020       | 323 [±5] | 4751 [±19]   | 159 [±3]       | 3948 [±17] | 12770 [±31]  |
| 2030       | 344 [±5] | 5131 [±19]   | 175 [±4]       | 4313 [±17] | 13747 [±31]  |

**Table A200. Prevalence cases avoided in year [per 100000] for Turkmenistan**

| Year       | Cancers | CHD & Stroke | Osteoarthritis | Diabetes  | Hypertension |
|------------|---------|--------------|----------------|-----------|--------------|
| Scenario 1 |         |              |                |           |              |
| 2010       | 0 [±6]  | 5 [±27]      | 4 [±5]         | -1 [±25]  | -11 [±44]    |
| 2020       | 4 [±7]  | 38 [±28]     | 3 [±5]         | 123 [±26] | 96 [±46]     |
| 2030       | 8 [±8]  | 70 [±29]     | 2 [±5]         | 235 [±28] | 210 [±48]    |
| Scenario 2 |         |              |                |           |              |
| 2010       | -2 [±6] | 10 [±27]     | -2 [±5]        | -1 [±25]  | -4 [±44]     |
| 2020       | 5 [±7]  | 112 [±28]    | 5 [±5]         | 385 [±26] | 331 [±45]    |
| 2030       | 13 [±7] | 178 [±29]    | 7 [±5]         | 707 [±27] | 699 [±47]    |

## Ukraine

**Table A201. Cumulative incidence cases from year 2010 [per 100000 of population in 2010] for Ukraine**

| Year       | Cancers    | CHD & Stroke | Osteoarthritis | Diabetes   | Hypertension |
|------------|------------|--------------|----------------|------------|--------------|
| Scenario 0 |            |              |                |            |              |
| 2010       | 147 [±3]   | 1126 [±9]    | 529 [±7]       | 244 [±4]   | 824 [±8]     |
| 2020       | 1783 [±12] | 12672 [±33]  | 6748 [±24]     | 2789 [±16] | 8735 [±27]   |
| 2030       | 3899 [±20] | 27074 [±52]  | 15184 [±39]    | 5838 [±24] | 17390 [±42]  |
| Scenario 1 |            |              |                |            |              |
| 2010       | 149 [±3]   | 1127 [±9]    | 537 [±7]       | 237 [±4]   | 814 [±8]     |
| 2020       | 1773 [±12] | 12548 [±33]  | 6596 [±24]     | 2582 [±15] | 8335 [±27]   |
| 2030       | 3850 [±20] | 26792 [±51]  | 14823 [±38]    | 5427 [±23] | 16636 [±41]  |
| Scenario 2 |            |              |                |            |              |
| 2010       | 145 [±3]   | 1125 [±9]    | 535 [±7]       | 245 [±4]   | 819 [±8]     |
| 2020       | 1700 [±12] | 12299 [±33]  | 6199 [±23]     | 2172 [±14] | 7571 [±26]   |
| 2030       | 3706 [±19] | 26166 [±51]  | 13941 [±37]    | 4597 [±21] | 15195 [±39]  |

**Table A202. Cumulative incidence cases avoided from year 2010 [per 100000 of population in 2010] for Ukraine**

| Year       | Cancers   | CHD & Stroke | Osteoarthritis | Diabetes   | Hypertension |
|------------|-----------|--------------|----------------|------------|--------------|
| Scenario 1 |           |              |                |            |              |
| 2010       | -2 [±5]   | -1 [±13]     | 7 [±6]         | 10 [±11]   | -8 [±9]      |
| 2020       | 10 [±17]  | 124 [±45]    | 207 [±21]      | 400 [±37]  | 152 [±33]    |
| 2030       | 49 [±25]  | 282 [±66]    | 411 [±30]      | 754 [±52]  | 361 [±49]    |
| Scenario 2 |           |              |                |            |              |
| 2010       | 2 [±5]    | 1 [±13]      | -1 [±6]        | 5 [±11]    | -6 [±9]      |
| 2020       | 83 [±17]  | 373 [±45]    | 617 [±20]      | 1164 [±36] | 549 [±32]    |
| 2030       | 193 [±25] | 908 [±65]    | 1241 [±29]     | 2195 [±51] | 1243 [±48]   |

**Table A203. Prevalence cases in year [per 100000] for Ukraine**

| Year       | Cancers    | CHD & Stroke | Osteoarthritis | Diabetes   | Hypertension |
|------------|------------|--------------|----------------|------------|--------------|
| Scenario 0 |            |              |                |            |              |
| 2010       | 736 [±8]   | 4382 [±19]   | 16571 [±36]    | 5822 [±22] | 29854 [±49]  |
| 2020       | 967 [±9]   | 5757 [±22]   | 18053 [±40]    | 6619 [±24] | 32922 [±53]  |
| 2030       | 1106 [±10] | 6780 [±26]   | 20729 [±45]    | 7355 [±27] | 35361 [±59]  |
| Scenario 1 |            |              |                |            |              |
| 2010       | 740 [±8]   | 4379 [±19]   | 16573 [±36]    | 5807 [±22] | 29859 [±49]  |
| 2020       | 967 [±9]   | 5710 [±22]   | 17942 [±39]    | 6428 [±24] | 32585 [±53]  |
| 2030       | 1093 [±10] | 6682 [±26]   | 20495 [±45]    | 7045 [±26] | 34786 [±59]  |
| Scenario 2 |            |              |                |            |              |
| 2010       | 742 [±8]   | 4383 [±19]   | 16560 [±36]    | 5825 [±22] | 29822 [±49]  |
| 2020       | 938 [±9]   | 5598 [±22]   | 17591 [±39]    | 6096 [±23] | 31894 [±52]  |
| 2030       | 1063 [±10] | 6479 [±25]   | 19842 [±44]    | 6457 [±25] | 33643 [±58]  |

**Table A204. Prevalence cases avoided in year [per 100000] for Ukraine**

| Year       | Cancers  | CHD & Stroke | Osteoarthritis | Diabetes   | Hypertension |
|------------|----------|--------------|----------------|------------|--------------|
| Scenario 1 |          |              |                |            |              |
| 2010       | -4 [±11] | 3 [±26]      | 15 [±31]       | -5 [±69]   | -2 [±51]     |
| 2020       | 0 [±12]  | 47 [±30]     | 191 [±32]      | 337 [±72]  | 111 [±54]    |
| 2030       | 13 [±13] | 98 [±33]     | 310 [±34]      | 575 [±75]  | 234 [±57]    |
| Scenario 2 |          |              |                |            |              |
| 2010       | -6 [±11] | -1 [±26]     | -3 [±31]       | 32 [±69]   | 11 [±51]     |
| 2020       | 29 [±12] | 159 [±30]    | 523 [±32]      | 1028 [±72] | 462 [±53]    |
| 2030       | 43 [±13] | 301 [±33]    | 898 [±33]      | 1718 [±74] | 887 [±57]    |

## United Kingdom

**Table A205. Cumulative incidence cases from year 2010 [per 100000 of population in 2010] UK**

| Year       | Cancers    | CHD & Stroke | Osteoarthritis | Diabetes   | Hypertension |
|------------|------------|--------------|----------------|------------|--------------|
| Scenario 0 |            |              |                |            |              |
| 2010       | 223 [±4]   | 519 [±6]     | 17 [±1]        | 168 [±4]   | 247 [±4]     |
| 2020       | 2577 [±14] | 5938 [±22]   | 187 [±4]       | 1923 [±12] | 2794 [±15]   |
| 2030       | 5164 [±20] | 12164 [±31]  | 370 [±5]       | 3919 [±17] | 5539 [±21]   |
| Scenario 1 |            |              |                |            |              |
| 2010       | 226 [±4]   | 521 [±6]     | 17 [±1]        | 166 [±4]   | 247 [±4]     |
| 2020       | 2541 [±14] | 5869 [±21]   | 182 [±4]       | 1802 [±12] | 2717 [±15]   |
| 2030       | 5092 [±20] | 11960 [±31]  | 360 [±5]       | 3656 [±17] | 5354 [±20]   |
| Scenario 2 |            |              |                |            |              |
| 2010       | 229 [±4]   | 526 [±6]     | 17 [±1]        | 165 [±4]   | 247 [±4]     |
| 2020       | 2458 [±14] | 5589 [±21]   | 172 [±4]       | 1474 [±11] | 2481 [±14]   |
| 2030       | 4925 [±20] | 11348 [±30]  | 339 [±5]       | 3021 [±15] | 4888 [±19]   |

**Table A206. Cumulative incidence cases avoided from year 2010 [per 100000 of population in 2010] United Kingdom**

| Year       | Cancers   | CHD & Stroke | Osteoarthritis | Diabetes  | Hypertension |
|------------|-----------|--------------|----------------|-----------|--------------|
| Scenario 1 |           |              |                |           |              |
| 2010       | 0 [±6]    | 0 [±9]       | 0 [±2]         | 2 [±5]    | 0 [±6]       |
| 2020       | 36 [±20]  | 69 [±31]     | 5 [±5]         | 121 [±17] | 77 [±21]     |
| 2030       | 72 [±29]  | 204 [±44]    | 10 [±8]        | 263 [±25] | 185 [±30]    |
| Scenario 2 |           |              |                |           |              |
| 2010       | 0 [±6]    | 0 [±9]       | 0 [±2]         | 3 [±5]    | 0 [±6]       |
| 2020       | 119 [±20] | 349 [±30]    | 15 [±5]        | 449 [±16] | 313 [±21]    |
| 2030       | 239 [±28] | 816 [±43]    | 31 [±8]        | 898 [±24] | 651 [±29]    |

**Table A207. Prevalence cases in year [per 100000] UK**

| Year       | Cancers    | CHD & Stroke | Osteoarthritis | Diabetes   | Hypertension |
|------------|------------|--------------|----------------|------------|--------------|
| Scenario 0 |            |              |                |            |              |
| 2010       | 1202 [±10] | 2657 [±15]   | 381 [±6]       | 2747 [±15] | 5190 [±20]   |
| 2020       | 1478 [±11] | 3229 [±16]   | 405 [±6]       | 3372 [±16] | 5910 [±21]   |
| 2030       | 1631 [±11] | 3730 [±17]   | 434 [±6]       | 3850 [±17] | 6422 [±22]   |
| Scenario 1 |            |              |                |            |              |
| 2010       | 1203 [±10] | 2656 [±15]   | 382 [±6]       | 2754 [±15] | 5204 [±20]   |
| 2020       | 1459 [±11] | 3198 [±16]   | 402 [±6]       | 3275 [±16] | 5867 [±21]   |
| 2030       | 1621 [±11] | 3652 [±17]   | 431 [±6]       | 3656 [±17] | 6296 [±22]   |
| Scenario 2 |            |              |                |            |              |
| 2010       | 1221 [±10] | 2660 [±15]   | 386 [±6]       | 2752 [±15] | 5194 [±20]   |
| 2020       | 1431 [±11] | 3047 [±15]   | 396 [±6]       | 2999 [±15] | 5663 [±21]   |
| 2030       | 1583 [±11] | 3457 [±16]   | 419 [±6]       | 3220 [±16] | 5983 [±22]   |

**Table A208. Prevalence cases avoided in year [per 100000] United Kingdom**

| Year       | Cancers  | CHD & Stroke | Osteoarthritis | Diabetes  | Hypertension |
|------------|----------|--------------|----------------|-----------|--------------|
| Scenario 1 |          |              |                |           |              |
| 2010       | 0 [±14]  | 1 [±21]      | 0 [±8]         | 0 [±21]   | 0 [±29]      |
| 2020       | 19 [±15] | 31 [±23]     | 3 [±8]         | 97 [±23]  | 43 [±31]     |
| 2030       | 10 [±16] | 78 [±24]     | 3 [±8]         | 194 [±25] | 126 [±32]    |
| Scenario 2 |          |              |                |           |              |
| 2010       | 0 [±14]  | 0 [±21]      | 0 [±8]         | 0 [±21]   | 0 [±29]      |
| 2020       | 47 [±15] | 182 [±22]    | 9 [±8]         | 373 [±23] | 247 [±30]    |
| 2030       | 48 [±16] | 273 [±24]    | 15 [±8]        | 630 [±24] | 439 [±32]    |

## Uzbekistan

**Table A209. Cumulative incidence cases from year 2010 [per 100000 of population in 2010] for Uzbekistan**

| Year       | Cancers  | CHD & Stroke | Osteoarthritis | Diabetes   | Hypertension |
|------------|----------|--------------|----------------|------------|--------------|
| Scenario 0 |          |              |                |            |              |
| 2010       | 33 [±2]  | 1302 [±10]   | 8 [±1]         | 68 [±2]    | 239 [±4]     |
| 2020       | 345 [±5] | 10832 [±28]  | 91 [±3]        | 811 [±8]   | 2664 [±14]   |
| 2030       | 665 [±7] | 19682 [±37]  | 182 [±4]       | 1742 [±11] | 5435 [±19]   |
| Scenario 1 |          |              |                |            |              |
| 2010       | 33 [±2]  | 1308 [±10]   | 8 [±1]         | 68 [±2]    | 236 [±4]     |
| 2020       | 342 [±5] | 10721 [±28]  | 88 [±3]        | 735 [±7]   | 2533 [±14]   |
| 2030       | 658 [±7] | 19405 [±36]  | 175 [±3]       | 1568 [±10] | 5172 [±19]   |
| Scenario 2 |          |              |                |            |              |
| 2010       | 31 [±2]  | 1300 [±10]   | 8 [±1]         | 68 [±2]    | 239 [±4]     |
| 2020       | 327 [±5] | 10413 [±28]  | 83 [±2]        | 616 [±7]   | 2399 [±13]   |
| 2030       | 634 [±7] | 18838 [±36]  | 166 [±3]       | 1295 [±9]  | 4847 [±18]   |

**Table A210. Cumulative incidence cases avoided from year 2010 [per 100000 of population in 2010] for Uzbekistan**

| Year       | Cancers  | CHD & Stroke | Osteoarthritis | Hypertension | Diabetes  |
|------------|----------|--------------|----------------|--------------|-----------|
| Scenario 1 |          |              |                |              |           |
| 2010       | 0 [±2]   | -6 [±14]     | 0 [±1]         | 3 [±6]       | 0 [±3]    |
| 2020       | 3 [±7]   | 111 [±42]    | 3 [±4]         | 131 [±20]    | 76 [±11]  |
| 2030       | 7 [±10]  | 277 [±56]    | 7 [±5]         | 263 [±29]    | 174 [±16] |
| Scenario 2 |          |              |                |              |           |
| 2010       | 2 [±2]   | 2 [±14]      | 0 [±1]         | 0 [±6]       | 0 [±3]    |
| 2020       | 18 [±7]  | 419 [±41]    | 8 [±4]         | 265 [±20]    | 195 [±11] |
| 2030       | 31 [±10] | 844 [±56]    | 16 [±5]        | 588 [±29]    | 447 [±16] |

**Table A211. Prevalence cases in year [per 100000] for Uzbekistan**

| Year       | Cancers  | CHD & Stroke | Osteoarthritis | Diabetes   | Hypertension |
|------------|----------|--------------|----------------|------------|--------------|
| Scenario 0 |          |              |                |            |              |
| 2010       | 196 [±4] | 3374 [±16]   | 139 [±3]       | 1228 [±10] | 5113 [±20]   |
| 2020       | 218 [±4] | 4097 [±17]   | 136 [±3]       | 1390 [±10] | 5665 [±20]   |
| 2030       | 242 [±4] | 4654 [±18]   | 156 [±3]       | 1733 [±11] | 6565 [±21]   |
| Scenario 1 |          |              |                |            |              |
| 2010       | 197 [±4] | 3389 [±16]   | 138 [±3]       | 1223 [±10] | 5100 [±20]   |
| 2020       | 221 [±4] | 4051 [±17]   | 133 [±3]       | 1321 [±10] | 5536 [±20]   |
| 2030       | 241 [±4] | 4574 [±18]   | 153 [±3]       | 1604 [±10] | 6346 [±21]   |
| Scenario 2 |          |              |                |            |              |
| 2010       | 196 [±4] | 3384 [±16]   | 140 [±3]       | 1228 [±10] | 5094 [±20]   |
| 2020       | 215 [±4] | 3951 [±17]   | 131 [±3]       | 1226 [±10] | 5427 [±20]   |
| 2030       | 235 [±4] | 4443 [±17]   | 147 [±3]       | 1398 [±10] | 6109 [±20]   |

**Table A212. Prevalence cases avoided in year [per 100000] for Uzbekistan**

| Year       | Cancers | CHD & Stroke | Osteoarthritis | Diabetes  | Hypertension |
|------------|---------|--------------|----------------|-----------|--------------|
| Scenario 1 |         |              |                |           |              |
| 2010       | -1 [±6] | -15 [±23]    | 1 [±5]         | 5 [±14]   | 13 [±29]     |
| 2020       | -3 [±6] | 46 [±26]     | 3 [±5]         | 69 [±15]  | 129 [±30]    |
| 2030       | 1 [±6]  | 80 [±27]     | 3 [±5]         | 129 [±16] | 219 [±32]    |
| Scenario 2 |         |              |                |           |              |
| 2010       | 0 [±6]  | -10 [±23]    | -1 [±5]        | 0 [±14]   | 19 [±29]     |
| 2020       | 3 [±6]  | 146 [±25]    | 5 [±5]         | 164 [±14] | 238 [±30]    |
| 2030       | 7 [±6]  | 211 [±27]    | 9 [±5]         | 335 [±16] | 456 [±32]    |

# BMJ Open

## The future burden of obesity-related diseases in the 53 WHO European Region countries and the impact of effective interventions: A modelling study

|                                                                                                                                                                                                       |                                                                                                                                                                                                                                                                                                                                                                                                                                         |
|-------------------------------------------------------------------------------------------------------------------------------------------------------------------------------------------------------|-----------------------------------------------------------------------------------------------------------------------------------------------------------------------------------------------------------------------------------------------------------------------------------------------------------------------------------------------------------------------------------------------------------------------------------------|
| Journal:                                                                                                                                                                                              | <i>BMJ Open</i>                                                                                                                                                                                                                                                                                                                                                                                                                         |
| Manuscript ID:                                                                                                                                                                                        | bmjopen-2014-004787.R1                                                                                                                                                                                                                                                                                                                                                                                                                  |
| Article Type:                                                                                                                                                                                         | Research                                                                                                                                                                                                                                                                                                                                                                                                                                |
| Date Submitted by the Author:                                                                                                                                                                         | 28-Apr-2014                                                                                                                                                                                                                                                                                                                                                                                                                             |
| Complete List of Authors:                                                                                                                                                                             | Webber, Laura; UK Health Forum, Modelling<br>Divajeva, Diana; UK Health Forum, Modelling<br>Marsh, Tim; UK Health Forum, Modelling<br>McPherson, Klim; New College, University of Oxford<br>Brown, Martin; UK Health Forum, Modelling<br>Galea, Gauden; World Health Organization, Division of Noncommunicable Diseases and Life-course<br>Breda, Joao; World Health Organization, Division of Noncommunicable Diseases and Life-course |
| <b>Primary Subject Heading</b>:                                                                                                                                                                       | Public health                                                                                                                                                                                                                                                                                                                                                                                                                           |
| Secondary Subject Heading:                                                                                                                                                                            | Epidemiology, Global health, Nutrition and metabolism, Research methods                                                                                                                                                                                                                                                                                                                                                                 |
| Keywords:                                                                                                                                                                                             | Coronary heart disease < CARDIOLOGY, EPIDEMIOLOGY, NUTRITION & DIETETICS, PUBLIC HEALTH, STATISTICS & RESEARCH METHODS                                                                                                                                                                                                                                                                                                                  |
| <p>Note: The following files were submitted by the author for peer review, but cannot be converted to PDF. You must view these files (e.g. movies) online.</p> <p>Supplementary information2.docx</p> |                                                                                                                                                                                                                                                                                                                                                                                                                                         |

SCHOLARONE™  
Manuscripts



1  
2  
3  
4  
5  
6 1  
7  
8  
9  
10 2 **The future burden of obesity-related diseases in the 53 WHO**  
11 3 **European-Region countries and the impact of effective interventions:**  
12 4 **A modelling study.**  
13  
14  
15 5  
16  
17 6  
18  
19

20 7 Laura Webber, Diana Divajeva, Tim Marsh, Klim McPherson, Martin Brown, Gauden Galea, Joao  
21 8 Breda

22  
23 9 Corresponding author: Laura Webber, Deputy Director: Modelling, UK Health Forum, Fleetbank  
24 10 House, 2-6 Salisbury Square, London, EC4Y 8JX, UK [laura.webber@ukhealthforum.org.uk](mailto:laura.webber@ukhealthforum.org.uk)

25  
26 11 Diana Divajeva, Research Associate, UK Health Forum, Fleetbank House, 2-6 Salisbury Square,  
27 12 London, EC4Y 8JX, UK

28  
29 13 Tim Marsh, Director: Modelling, UK Health Forum, Fleetbank House, 2-6 Salisbury Square, London,  
30 14 EC4Y 8JX, UK

31  
32 15 Klim McPherson, Emeritus Professor, New College, University of Oxford, OX1 3BN

33  
34 16 Martin Brown, Senior statistician, UK Health Forum, Fleetbank House, 2-6 Salisbury Square, London,  
35 17 EC4Y 8JX, UK

36  
37 18 Gauden Galea, Director of the Division of Noncommunicable Diseases and Life-course, WHO  
38 19 Regional Office for Europe, UN City; Marmorvej 51 - DK-2100 Copenhagen ø Denmark, Phone: +45  
39 20 30 50 8022

40  
41 21 Joao Breda, Programme Manager, Nutrition, Physical Activity and Obesity WHO Regional Office for  
42 22 Europe, UN City; Marmorvej 51 - DK-2100 Copenhagen ø Denmark, Phone: +45 30 50 8022

43  
44 23  
45  
46 24 Key words: obesity, Europe, modelling, micro-simulation

47  
48 25 Running head: obesity and related diseases in 53 WHO/Europe countries

49  
50 26  
51 27 Disclaimer

52  
53 28 Gauden Galea and João Breda are staff members of the World Health Organization. The authors alone are  
54 29 responsible for the content and writing of this paper, which does not necessarily represent the decisions,  
55 30 policy or views of the World Health Organization.

56  
57 31  
58  
59  
60

1 The Corresponding Author has the right to grant on behalf of all authors and does grant on behalf of  
2 all authors, a worldwide licence to the Publishers and its licensees in perpetuity, in all forms, formats  
3 and media (whether known now or created in the future), to i) publish, reproduce, distribute, display  
4 and store the Contribution, ii) translate the Contribution into other languages, create adaptations,  
5 reprints, include within collections and create summaries, extracts and/or, abstracts of the  
6 Contribution, iii) create any other derivative work(s) based on the Contribution, iv) to exploit all  
7 subsidiary rights in the Contribution, v) the inclusion of electronic links from the Contribution to  
8 third party material where-ever it may be located; and, vi) licence any third party to do any or all of  
9 the above.

10

11

For peer review only

## Abstract

**Objective:** Non-communicable diseases (NCDs) are the biggest cause of death in Europe putting unsustainable burden on already struggling health systems. Increases in obesity are a major cause of NCDs. This paper projects the future burden of coronary heart disease (CHD), stroke, type 2 diabetes and seven cancers to 2030 in 53 WHO European Region countries based on current and past body mass index (BMI) trends. It also tests the impact of obesity interventions upon the future disease burden.

**Setting and participants:** Secondary data analysis of country-specific epidemiological data using a microsimulation modelling process.

**Interventions:** The effect of three hypothetical scenarios on the future burden of disease in 2030 was tested: baseline scenario, BMI trends go unchecked; intervention 1, population BMI decreases by 1%; intervention 2, BMI decreases by 5%.

**Primary and secondary outcome measures:** Quantifying the future burden major NCDs and the impact of interventions on this future disease burden.

**Results:** By 2030 in the whole of the European region the prevalence of diabetes, CHD & stroke and cancers was projected to reach an average of 3990, 4672 and 2046 cases per 100,000 respectively. The highest prevalence of diabetes was predicted in Slovakia (10,870), CHD & stroke – in Greece (11,292) and cancers – in Finland (5615 cases per 100,000). A 5% fall in population BMI was projected to significantly reduce cumulative incidence of diseases. The largest reduction in diabetes and CHD & stroke was observed in Slovakia (3054 and 3369 cases per 100,000 respectively) and in cancers was predicted in Germany (331 per 100,000).

**Conclusions:** Modelling future disease trends is important for policy makers in realistically allocating resources and implementing policies that prevent NCDs. Future research will allow real policy interventions to be tested, however better surveillance data on NCDs and their risk factors are essential for research and policy.

## Strengths and limitations

### Strengths

- This study projects the future burden of obesity-related diseases using sophisticated microsimulation modelling software

1  
2  
3  
4  
5  
6  
7  
8  
9  
10  
11  
12  
13  
14  
15  
16  
17  
18  
19  
20  
21  
22  
23  
24  
25  
26  
27  
28  
29  
30  
31  
32  
33  
34  
35  
36  
37  
38  
39  
40  
41  
42  
43  
44  
45  
46  
47  
48  
49  
50  
51  
52  
53  
54  
55  
56  
57  
58  
59  
60

- 
- 1 - It quantifies the impact on major chronic diseases (CHD, stroke, Type 2 diabetes, cancers)  
2 given a 1 or 5% reduction in population BMI
  - 3 - It highlights the need for good quality surveillance data for diseases and their risk factors so  
4 that accurate estimates can be made  
5

### 6 *Limitations*

- 7 - The model does not take account of future changes in circumstances such as fluctuations in  
8 food prices or new medical technologies.
- 9 - The model is only as good as the data that are entered into it, with good quality data more  
10 accurate predictions can be made  
11

## Background

Noncommunicable diseases (NCD) such as cardiovascular and respiratory disease are the highest cause of death globally (1). In 2008 the World Health Organization (WHO) estimated that mortality from heart disease, stroke, chronic lung disease, cancer and diabetes totalled 36.1 million (2). The growing burden of NCDs warranted urgent political action. In September 2011 during the UN High Level Meeting on NCDs global leaders made a political declaration to provide a coordinated response for preventing and controlling NCDs (3). As a result nine global voluntary targets aiming at combatting global mortality from the four main NCDs, accelerating action against the leading risk factors for NCDs and strengthening national health system responses were set out (4).

In Europe NCDs are high on the European parliament's agenda as they account for 86% of deaths and 77% of disease burden (2). This burden is unequally distributed both within and between the European countries: individuals from the most disadvantaged groups often have poorer access to health care and fewer resources such as education, employment, and housing – all of which reduce the opportunities for healthy lifestyle choices. The new European health policy framework, Health 2020, highlights these inequalities and offers a roadmap for the policy makers and public health professionals (5). The WHO European Region is determined to take forward the UN political declaration to reduce avoidable deaths from NCDs turning the declaration into action and the WHO is working to provide public health tools that help all countries across the broader European region to implement more effective programmes based on an extensive reflection process (5).

The causes of NCDs may be genetic, behavioural and environmental (6). Rapid changes in health related behaviours in recent decades have seen an upsurge in NCD prevalence (7) through modifiable lifestyle factors such as diet and exercise. Market forces driving down costs of high calorie fatty, salty and sugary foods have made them cheap and readily available resulting in increased consumption and expanding waistlines. In addition, advances in technology such as motorised transport, labour mechanisation and television have promoted sedentary lifestyles and reduced physical activity (8). Interventions that are able to tackle important risk factors such as obesity are likely to have a positive impact upon NCD prevalence and premature mortality caused by NCDs.

Projections from the UK show that behavioural interventions can be effective in reducing future incidence of diseases such as coronary heart disease, stroke, type 2 diabetes and some cancers. For example, reducing body mass index (BMI) by 1% across the population (equivalent to 1kg weight loss) was estimated to substantially reduce health burden, saving 179,000-202,000 incident cases of

1 type 2 diabetes, 122,000 cases of cardiovascular diseases and 32,000-33,000 incident cases of cancer  
2 over 20 years (9). Data from Russia show that obesity rates are predicted to increase to as high as  
3 76% in males by 2050, and rates of CHD and stroke will reach 12,723 cases per 100,000 of the  
4 population (10). Similar projections have been implemented in other European countries (11),  
5 though to our knowledge estimates of the future burden of obesity-related diseases in all European  
6 countries have not been carried out.

7 There is, therefore a new threat menacing recent progress in NCD mortality and morbidity which  
8 needs to be quantified and the current study ignites this discussion within the context of health  
9 impact models. This study also hypothesises that while reduction in the burden of NCDs has been  
10 sustained, obesity is actually threatening those gains. As such this study updates and extends this  
11 work by using a microsimulation model to project NCD trends to 2030 in all 53 Euro-region countries  
12 and assesses the impact of two hypothetical interventions, intervention 1: a 1% reduction in  
13 population BMI and intervention 2: a 5% reduction in population BMI, upon the future incidence of  
14 CHD and stroke, type 2 diabetes and obesity-related cancers.

## 16 **Methods**

### 18 *BMI data extraction*

20 Online databases (Global database on Body Mass Index (12), EU members' statistical office  
21 databases, Pubmed (13) and Science Direct (14)) were searched for published data on age and sex-  
22 specific country obesity prevalence data presented according WHO definitions of normal weight,  
23 overweight and obesity (12). In addition, article references were probed and individual researchers  
24 and public health officers were contacted for further data. A table of BMI references is presented in  
25 Appendix 1 and methods of BMI data manipulation are explained in Appendix 2a-b of the  
26 supplementary information.

### 28 *Disease data sources*

30 A second review of statistical databases and literature was carried out to locate country-specific  
31 incidence, prevalence, survival and mortality data for CHD, stroke and obesity-related cancers

1 (colorectal, pancreas, breast, kidney, liver, corpus uteri and oesophageal) as well as incidence and/or prevalence data of type 2 diabetes.

Where prevalence, but not incidence, data were available by age and sex the prevalence was converted to incidence using equations devised for DISMOD II software (15). Briefly, incidence is calculated from prevalence using a Downhill Simplex Method (16), where the algorithm determines the incidence iteratively using a best fit to the known prevalence.

Where neither incidence nor prevalence data were available data from a proxy country were used. CHD incidence was often rare, so UK, Georgia, Spain, Russia, Uzbekistan incidence data were used as proxies for countries in a similar geographical location or countries which had comparable average prevalence rates. For example, for CHD data Russian data were used as a proxy for Belarus; and Uzbekistan data were used for Kazakhstan, Kyrgyzstan, Tajikistan, and Turkmenistan. Only Belarus, Denmark, Finland, Ireland, Norway, Russian Federation and the UK had full sets of disease data. Furthermore, many countries required a proxy for survival data. Greater detail of which countries were used as proxies is presented in Appendix 3. For fatal diseases the ratio of the target-to-proxy countries' mortality rates was used to scale the proxy country's incidence rates. For type 2 diabetes proxy country data were adjusted for the different population BMI-distributions. For example, if country x had diabetes data and these were used a proxy for country y where no data exist, then country y's BMI distribution would determine the future burden of type 2 diabetes via the relative risk.

For survival data, the probability of survival,  $p$ , for a number of years,  $T$ , after acquiring a fatal disease was modelled in one of two ways depending on the disease. Either as a simple exponential distribution  $p=e^{-RT}$ , or as an exponential distribution allowing for different probability,  $p_1$ , of survival in the first year,  $p=p_1e^{-R(T-1)}$ . Stroke used the latter model; other fatal diseases the former. Disease survival statistics consist of the rate  $R$  or the rate  $R$  together with the first year survival probability  $p_1$ . These statistics can be further classified by age group and gender. The rate  $R$  was usually inferred from quoted 5-year survival statistics.

The relative risks of contracting each disease according to pre-obesity (BMI 25-29.9 kg/m<sup>2</sup>) and obesity (BMI 30≥ kg/m<sup>2</sup>) relative to normal weight (BMI 18.5-24.9 kg/m<sup>2</sup>) with age and sex as covariates were taken from the International Association for the Study of Obesity (17). A table of disease references for each country is presented in Appendix 3.

### Statistical analysis

1 Detailed statistical analysis is described in Appendix 4, Foresight: Tackling Obesities (18) and Wang  
2 and colleagues (9). Briefly, a dual-module modelling process was carried out: module one fits cross-  
3 sectional BMI data from each country using a non-linear multivariate, categorical regression model.  
4 Module two creates virtual country cohorts of 5,000,000 individuals using a microsimulation method  
5 to produce longitudinal projections to 2030 based on module one BMI distributions.  
6 Microsimulation is a computer modelling technique that works at the level of the individual; it  
7 generates individual life-histories of a specified population and this population reflects the age  
8 profile, birth, death and health statistics to make future projections. A BMI value is probabilistically  
9 assigned as a function of age, sex and calendar year and an individuals' BMI percentile in the same  
10 age cohort assumed to stay the same over time. Population size, births and deaths were also  
11 simulated in a large number of individuals as they age using data from the United Nations population  
12 statistics (19). Population pyramids are presented in Appendix 5. Within the simulation, individuals  
13 are at greater risk of getting a particular disease each year if he or she did not have the disease at  
14 the beginning of the year. Individuals can continue living with the disease or die from it if it is fatal.  
15 The software for this program was written in C++ (20).

16 To estimate the disease burden associated with the trends in overweight and obesity, as well as the  
17 effect of possible interventions, future increases in obesity-related diseases were projected from  
18 2010 to 2030, using three different trend interventions: baseline scenario: BMI trends go unchecked;  
19 intervention 1: mean population BMI decreases by 1% and intervention 2: mean population BMI  
20 decreases by 5%. The cumulative incidence cases avoided for the whole of Europe was analysed by  
21 summing the weighted average of incidence for each country.

## 22 Results

23  
24 Only 36 countries had three or more years of BMI data. Less than or equal to two points of BMI data  
25 were available for the remaining 17 countries (Albania, Andorra, Belarus, Bosnia, Croatia, Cyprus,  
26 Georgia, Hungary, Macedonia, Monaco, Montenegro, Romania, San Marino, Serbia, Slovenia,  
27 Tajikistan and Turkmenistan) so results in this instance are interpreted with caution.

28 Alongside obesity, obesity-related diseases are projected to increase in almost all countries. Figure 1  
29 presents the average projected prevalence rates for Europe (weighted for total population) by  
30 intervention. Relative to the baseline scenario (no intervention to reduce population BMI) a 1%  
31 reduction in BMI would result in an average of 3990 and 3807 type 2 diabetes prevalence cases per  
32 100,000 of the population in Europe respectively. This is a prevalence gain of 183 cases per 100,000,  
33 equating to a 4.6% reduction in prevalence. A 5% reduction in population BMI would result in an



1 average of 3411 cases of type 2 diabetes by 2030 per 100,000 of the population in 2010. This is a  
2 reduction in prevalence of 579 cases per 100,000, equating to a 14.5% reduction across Europe.

3 Figure 2 shows the projected prevalence to 2030 of each disease by country per 100,000 of the  
4 population in 2010. There was a wide variability between countries. The highest projected  
5 prevalence of cancers was observed in Finland with 5615 cases per 100,000 of the population in  
6 2010. The highest projected prevalence of CHD and stroke was observed in Greece with 11,292 cases  
7 and the highest projected prevalence of type 2 diabetes was in Slovakia with 10,870 cases per  
8 100,000 of the population in 2010.

9 Figure 3 presents the European average cumulative incidence gains by 2030 for each disease given a  
10 1% or 5% reduction in population BMI relative to the baseline scenario. As expected, higher  
11 reductions of population BMI would result in a number of obesity-related disease cases being  
12 avoided by 2030. A 1% reduction in BMI would result in an average reduction of 365 cases of CHD  
13 and stroke per 100,000 of the population by 2030. A 5% reduction in population BMI would result  
14 in the avoidance of 1317 cumulative incidence cases of CHD and stroke per 100,000 of the  
15 population.

16 Figure 4 presents cumulative incidence cases avoided in each of the 53 WHO European region  
17 countries if population BMI is reduced by 5%. The highest reduction in CHD and stroke and type 2  
18 diabetes was predicted in Slovakia with 3054 and 3369 cumulative incidence cases per 100,000  
19 population avoided by 2030 respectively. The highest reduction in cumulative incidence of obesity-  
20 related cancers was projected in Germany with 331 cases per 100,000 avoided by 2030.

21 Data tables for each country displaying cumulative incidence cases, cumulative incidence cases  
22 avoided, prevalence cases and prevalence cases avoided per 100,000 of the population are  
23 presented in Appendix 6.

## 24

### 25 Conclusions

26

27 This study used a microsimulation model to test the impact of effective interventions that reduce  
28 population BMI upon the future burden of disease. With only a few exceptions, obesity rates across  
29 the 53 countries were projected to increase by 2030. This is worrying given the extent of the related  
30 disease burden associated with obesity. There appeared to be very little pattern to the projected  
31 disease trends regionally across Europe.

1  
2  
3  
4 1 Because of increasing obesity trends our findings suggest that in 20 years an increasing number of  
5 2 people will be living with an obesity-related chronic disease in almost every county in Europe. Birth  
6 3 rates are low across Europe with most total fertility rates (TFR) below 2. This means that the  
7 4 population is ageing with fewer young people. Only Azerbaijan (2.12), Israel (2.62), Tajikistan (3.13)  
8 5 and Uzbekistan (2.19) have TFRs above 2. Projecting further we may observe a dip in prevalence  
9 6 rates as those with the disease die while there are fewer younger people to contract the disease.  
10 7 Differences in the population profiles across countries may therefore result in different estimates  
11 8 even if current disease incidence is comparable. Population profiles for each country are illustrated  
12 9 in Appendix 5 of the supplementary information.

13  
14  
15  
16  
17  
18  
19 10 Obesity-related cancers are rare and have relatively low rates compared with the other diseases.  
20 11 However, rates are projected to increase. Recent trends in cancer survival across Europe between  
21 12 2000 and 2004 reported that the survival of breast cancer was lower in Eastern Europe (Poland,  
22 13 Estonia, and Slovenia) than elsewhere in Europe (21). Screening and medical advances and varied  
23 14 access to effective treatment are likely to account for differences between Eastern and Western  
24 15 regions in Europe.

25  
26  
27  
28  
29  
30 16 Obesity is closely linked with insulin resistance and recent years have seen an epidemic of type 2  
31 17 diabetes evolve alongside rapid increases in obesity. In the UK alone, a continued increase in obesity  
32 18 is projected to add 6-8.5 million incidence cases of type 2 diabetes by 2030, at a substantial cost to  
33 19 the UK health system (9). Rates of CHD and stroke too were projected to increase across most  
34 20 countries. Highest prevalence rates were seen in Greece (11,292 per 100,000 population) and the  
35 21 lowest in Spain (1030 per 100,000 population). However, since very little CHD data were available,  
36 22 UK data was often used as a proxy, possibly underestimating the rates of CHD in Europe. Where  
37 23 data were available (e.g. Ireland, Finland) much higher rates were predicted suggesting that rates  
38 24 may be underestimated when using UK data and interpretation of proxy data should be made with  
39 25 caution. Data for stroke incidence was mostly taken from estimates by Truelson and colleagues (22).  
40 26 These data were compared with Estonia from the 2007 Tartu stroke registry (23) and appear to be  
41 27 slightly inflated. Similarly, rates were higher in the Truelson estimates compared with Polish data  
42 28 from 2005-2006 so rates of stroke incidence maybe slightly overestimated.

43  
44  
45  
46  
47  
48  
49  
50  
51 29 Quantification of the burden of NCDs is important both to patients and public health professionals  
52 30 because of the long-term consequences to patients' functioning and demand for health care (24).  
53 31 However, quantification via microsimulation is dependent upon good quality surveillance data. The  
54 32 present study highlights the lack of up-to-date surveillance data – especially annual measured BMI  
55 33 from the same survey and disease incidence data. These data are necessary if national policies to

1 control NCDs are to be appraised objectively. For some countries no satisfactory BMI data were  
2 available so proxy country data were used (in the case of Member States with very small  
3 populations) or extrapolated from mean data (in the case of other countries). Some of the trends  
4 shown by the analysis have large confidence intervals due to the small number of data points used  
5 as well as the small sample sizes of some of the studies, and therefore the observed trends can only  
6 be indicative. Ideally the data should be measured, but for most countries the only studies available  
7 were the ones in which anthropometry had been self-reported. This weakens the analysis,  
8 particularly if used in combination with measured data, because people tend to underreport their  
9 weight in interviews or surveys (25).

10 Relative risk data may also be limited in the extent to which they estimate the true impact of BMI on  
11 disease. Relative risks were taken from the International Association for the Study of Obesity (16) as  
12 these were deemed the best available at the time of development of the country models. However,  
13 there are limitations to these risks due to the lack of suitable meta-analyses used to calculate them. .  
14 They are also based on both measured and self-reported data and do not account for ethnic  
15 differences in body composition since they are based on largely white populations. In the present  
16 study we included the same relative risk for each Member State; however given the paucity of  
17 epidemiological data on both BMI and disease within many of the countries of interest it is unknown  
18 whether this assumption is valid.

19 Increased surveillance and monitoring of NCDs is one of the six key objectives of the WHO 2008-  
20 2013 Global strategy for the Prevention and Control of Non-communicable Diseases (26). This  
21 strategy aims to target governments in making policies that control and abate the increasing  
22 prevalence of NCDs across Europe and our results provide further evidence for raising the priority of  
23 NCD prevention. In particular, this study promotes the need for interventions that are effective in  
24 reducing major NCD risk factors (objective 3 of the strategy). In addition to this, in early 2013 the  
25 WHO formed a global monitoring framework which aims to track the progress of prevention of  
26 major non-communicable diseases and their key risk factors and consists of nine global targets and  
27 25 indicators adopted by the WHO Member States during the 66th World Health Assembly in May  
28 2013.

29 The microsimulation models are easily adaptable to include new data when it becomes available  
30 from such strategies. For example, we were not able to include data on children because of the  
31 limited amount of standardised data but with initiatives such as the WHO Childhood Obesity  
32 Surveillance Initiative (27) assessment of future childhood obesity trends will be possible.

1 This study tested hypothetical, and largely aspirational scenarios. However, it serves to demonstrate  
2 the value of modelling to quantify the estimated future health burden of risk factors. If data are  
3 available the model can test the long term effectiveness of real policy interventions and future work  
4 aims to do this (28).

6 A key assumption of the model is that people do not reverse in the BMI categories. At a population  
7 level this generally reflects reality, where weight loss is often only temporary. However this  
8 assumption does not take into account future changes in circumstances, such as fluctuations in food  
9 prices. It relies on our best estimate based on previous trends. That said, this approach allows for  
10 future trends to be forecast so that policy makers can plan interventions and allocate resources  
11 appropriately.

12 It is clear that tackling NCDs is a major challenge across Europe placing unsustainable burden on  
13 struggling health systems. This study provides a picture of the future with projections, and observes  
14 a worsening situation with increasing incidence of obesity-related disease. As a result, these findings  
15 call for governments to plan ahead and initiate change that effectively reduces key risk factors like  
16 obesity through preventative measures such as food tax, industry pledges and reduced junk food  
17 marketing. . Primary prevention is crucial if increasing trends are to be averted (29).

### 19 **Panel: Research in context**

21 Noncommunicable diseases (NCD) are the biggest cause of death in Europe. Health impact models  
22 are a useful and important policy tool enabling measurement of the future burden of NCDs. Obesity  
23 is a major modifiable risk factor for NCDs, which makes it necessary to quantify this threat. The  
24 current study explored the future impact of changing trends in BMI on the future burden of NCDs to  
25 2030. Effective interventions that successfully reduce population BMI by 1% or 5% would have a  
26 significant impact upon obesity-related diseases such as cardiovascular disease, type 2 diabetes and  
27 some cancers.

29 Microsimulation modelling should be utilised by policy makers so they can plan for the future  
30 provision of health care resources and instigate and maintain interventions that prevent the onset of  
31 debilitating NCDs at both an individual and national level.

1  
2  
3  
4  
5  
6  
7  
8  
9  
10  
11  
12  
13  
14  
15  
16  
17  
18  
19  
20  
21  
22  
23  
24  
25  
26  
27  
28  
29  
30  
31  
32  
33  
34  
35  
36  
37  
38  
39  
40  
41  
42  
43  
44  
45  
46  
47  
48  
49  
50  
51  
52  
53  
54  
55  
56  
57  
58  
59  
60

### 1 **Author contribution**

2 LW and DD carried out the acquisition, analysis and interpretation of data for the work in this study  
3 and drafted the manuscript. TM, JB, KM, GG contributed to the conception and design of this study.  
4 JB, GG, TM, MB, KM revised the document for important intellectual content.  
5 All authors edited and approved the final version of this manuscript and agree to be accountable for  
6 all aspects of the work in ensuring that questions related to the accuracy or integrity of any part of  
7 the work are appropriately investigated and resolved.

### 8 **Competing interests**

9 All authors have completed the ICMJE uniform disclosure form at [www.icmje.org/coi\\_disclosure.pdf](http://www.icmje.org/coi_disclosure.pdf)  
10 and declare: no support from any organisation for the submitted work; no financial relationships  
11 with any organisations that might have an interest in the submitted work in the previous three  
12 years; no other relationships or activities that could appear to have influenced the submitted work.

### 13 **Data sharing**

14 Data used in these analyses are from published sources and can be accessed upon request  
15 ([laura.webber@ukhealthforum.org.uk](mailto:laura.webber@ukhealthforum.org.uk)).

### 16 **Transparency declaration**

17 The lead author affirms that the manuscript is an honest, accurate, and transparent account of the  
18 study being reported; that no important aspects of the study have been omitted. Ethical approval  
19 was not required for this study since it is an epidemiological study reporting secondary analysis of  
20 data. This study was funded by the World Health Organization, Regional Office for Europe.  
21  
22  
23  
24  
25  
26  
27  
28  
29

## References

- 1  
2  
3  
4  
5  
6  
7  
8  
9  
10  
11  
12  
13  
14  
15  
16  
17  
18  
19  
20  
21  
22  
23  
24  
25  
26  
27  
28  
29  
30  
31  
32  
33  
34  
35  
36  
37  
38  
39  
40  
41  
42  
43  
44  
45  
46  
47  
48  
49  
50  
51  
52  
53  
54  
55  
56  
57  
58  
59  
60
- 1  
2  
3  
4  
5  
6  
7  
8  
9  
10  
11  
12  
13  
14  
15  
16  
17  
18  
19  
20  
21  
22  
23  
24  
25  
26  
27  
28  
29  
30  
31  
32  
33  
34  
35  
36  
37  
38  
39  
40  
41  
42  
43  
44  
45  
46  
47  
48  
49  
50  
51  
52  
53  
54  
55  
56  
57  
58  
59  
60
- (1) Imperial College London. Global Burden of Metabolic Risk Factors of Chronic Diseases. [www5.imperial.ac.uk/medicine/metabolic\\_risks/bmi/](http://www5.imperial.ac.uk/medicine/metabolic_risks/bmi/) (accessed May 20, 2013).
- (2) World Health Organization. Global Status Report on NCDs. [www.who.int/chp/ncd\\_global\\_status\\_report/en/](http://www.who.int/chp/ncd_global_status_report/en/) (accessed April 15, 2013).
- (3) General Assembly of the United Nations. UN High Level Meeting Non-Communicable Diseases. [www.un.org/en/ga/president/65/issues/ncdiseases.shtml](http://www.un.org/en/ga/president/65/issues/ncdiseases.shtml) (accessed June 1 2013)
- (4) World Health Organization. NCD Global Monitoring Framework. [www.who.int/nmh/global\\_monitoring\\_framework/en/](http://www.who.int/nmh/global_monitoring_framework/en/) (accessed June 1, 2013)
- (5) World Health Organization Regional Office for Europe. The new European policy for health. Health 2020: vision, values, main directions and approaches. [http://www.euro.who.int/\\_data/assets/pdf\\_file/0007/147724/wd09E\\_Health2020\\_111332.pdf](http://www.euro.who.int/_data/assets/pdf_file/0007/147724/wd09E_Health2020_111332.pdf) (accessed June 4 2013)
- (6) Shuldiner AR. Obesity genes and gene-environment-behavior interactions: recommendations for a way forward. *Obesity* 2008; Suppl 3: S79-S81.
- (7) World Health Organization. Diet, Nutrition and the prevention of Chronic Disease. 2003; [http://whqlibdoc.who.int/trs/who\\_trs\\_916.pdf](http://whqlibdoc.who.int/trs/who_trs_916.pdf) (accessed February 10, 2013)
- (8) Jones A, Bentham G, Foster C, et al. Foresight Tackling Obesities: Future Choices - Obesogenic Environments - Evidence Review. 2007; Government Office for Science. [www.bis.gov.uk/assets/foresight/docs/obesity/03.pdf](http://www.bis.gov.uk/assets/foresight/docs/obesity/03.pdf) (accessed January 23, 2013)
- (9) Wang YC, McPherson K, Marsh T, et al. Health and economic burden of the projected obesity trends in the USA and the UK. *Lancet* 2011; **378**:815-25.
- (10) Rtveldze K, Marsh T, Webber L, et al. Obesity trends in Russia. The impact on health and healthcare costs. *Health* 2012; **4**:1471-84.
- (11) Webber L, Kilpi F, Marsh T, et al. Modelling obesity trends and related diseases in Eastern Europe. *Obesity Reviews* 2012; **13**(8):744-51

- 1  
2  
3  
4 1  
5 2 (12) World Health Organization. Global database on body mass index. <http://apps.who.int/bmi/>  
6 (accessed March 3, 2012).  
7 3  
8 4  
9  
10  
11 5 (13) National Institute of Health. Pubmed.gov US National Library of Medicine.  
12 <http://www.ncbi.nlm.nih.gov/pubmed> (accessed March 2, 2013).  
13 6  
14  
15 7 (14) Elsevier. Science Direct. [www.sciencedirect.com](http://www.sciencedirect.com) (accessed June 15, 2012)  
16  
17 8  
18  
19 9 (15) World Health Organization. DISMOD II.  
20 [www.who.int/healthinfo/global\\_burden\\_disease/tools\\_software/en/](http://www.who.int/healthinfo/global_burden_disease/tools_software/en/) (accessed November  
21 10  
22 11 28, 2012)  
23 12  
24  
25 13 (16) Nelder J.A., and Mead, R.1965, "A simplex Method for Function Minimization", Computer  
26 14 Journal, vol7, pp308-313  
27 15  
28  
29 16 (17) International Association for the Study of Obesity. Estimated relative risk of disease by BMI  
30 17 category: overweight and obesity.  
31 18 [www.iaso.org/site\\_media/uploads/Appendix\\_Relative\\_Risk\\_Assessments\\_IASO.pdf](http://www.iaso.org/site_media/uploads/Appendix_Relative_Risk_Assessments_IASO.pdf)  
32 19 (accessed Novemeber 20, 2012)  
33 20  
34 21 (18) McPherson K, Marsh T, Brown M. Foresight report on obesity. *Lancet* 2007; **37**: 1755.  
35 22  
36 23 (19) United Nations Department of Economics and Social Affairs. World Population Prospects,  
37 24 the 2010 Revision. <http://esa.un.org/wpp/> (accessed 10 June 2012).  
38 25  
39 26  
40 27 (20) Embarcadero Technologies. embarcadero. [www.embarcadero.co.uk/](http://www.embarcadero.co.uk/) (accessed June 10,  
41 28 2013).  
42 29  
43  
44  
45  
46  
47 30 (21) Gondos A, Bray F, Brewster DH, et al. Recent trends in cancer survival across Europe  
48 31 between 2000 and 2004: a model-based period analysis from 12 cancer registries. *Eur J*  
49 32 Cancer 2008; **44**: 1463-75.  
50 33  
51 34  
52 35  
53 36  
54 37  
55 38  
56 39  
57 40  
58 41  
59 42  
60 43

- 1  
2  
3  
4 1 (22) Truelsen T P et al. Stroke Incidence and Prevalence in Europe: a Review of Available Data.  
5 2 European Journal of Neurology 2006 Jun;13(6):581-98.  
6  
7  
8 3 (23) Vibo R, Korv J, Roose M. The Third Stroke Registry in Tartu, Estonia, from 2001 to 2003. Acta  
9 4 Neurol Scand 2007 Jul;116(1):31-6.  
10  
11  
12 5 (24) Van Den Bos. The burden of chronic diseases in terms of disability, use of health care and  
13 6 healthy life expectancies. European journal of public health 1995;5:29-34.  
14  
15  
16 7 (25) Visscher TL, Viet AL, Kroesbergen IH, et al. Underreporting of BMI in adults and its effect on  
17 8 obesity prevalence estimations in the period 1998 to 2001. Obesity (Silver Spring) 2006; 14,  
18 9 2054-63.  
19  
20  
21  
22 10 (26) World Health Organization. 2008-2013 Action Plan for the Global Strategy for the Prevention  
23 11 and Control of Noncommunicable Diseases. Geneva, Switzerland: WHO document  
24 12 production services [www.who.int/nmh/publications/9789241597418/en/](http://www.who.int/nmh/publications/9789241597418/en/) (accessed June 1,  
25 13 2013).  
26  
27  
28  
29 14 (27) World Health Organization. Childhood Obesity Surveillance Initiative.  
30 15 [www.euro.who.int/en/what-we-do/health-topics/disease-](http://www.euro.who.int/en/what-we-do/health-topics/disease-prevention/nutrition/activities/monitoring-and-surveillance/who-european-childhood-obesity-surveillance-initiative-cosi)  
31 16 [prevention/nutrition/activities/monitoring-and-surveillance/who-european-childhood-](http://www.euro.who.int/en/what-we-do/health-topics/disease-prevention/nutrition/activities/monitoring-and-surveillance/who-european-childhood-obesity-surveillance-initiative-cosi)  
32 17 [obesity-surveillance-initiative-cosi](http://www.euro.who.int/en/what-we-do/health-topics/disease-prevention/nutrition/activities/monitoring-and-surveillance/who-european-childhood-obesity-surveillance-initiative-cosi) (accessed May 2, 2012).  
33  
34  
35  
36  
37 18 (28) Economics of chronic diseases. Project overview. <http://www.econdaproject.eu/> (accessed  
38 19 January 14, 2014)  
39  
40  
41 20 (29) World Health Organization. Global Status Report on NCDs 2011 - chapter 7.  
42 21 [www.who.int/chp/ncd\\_global\\_status\\_report/en/](http://www.who.int/chp/ncd_global_status_report/en/) (accessed June 2, 2013).  
43 22  
44  
45  
46  
47  
48  
49  
50  
51  
52  
53  
54  
55  
56  
57  
58  
59  
60



1  
2  
3  
4  
5  
6  
7  
8  
9  
10  
11  
12  
13  
14  
15  
16  
17  
18  
19  
20  
21  
22  
23  
24  
25  
26  
27  
28  
29  
30  
31  
32  
33  
34  
35  
36  
37  
38  
39  
40  
41  
42  
43  
44  
45  
46  
47  
48  
49  
50  
51  
52  
53  
54  
55  
56  
57  
58  
59  
60

1  
2  
3  
4  
5  
6  
7  
8  
9  
10  
11  
12  
13  
14  
15  
16  
17  
18  
19  
20  
21  
22  
23  
24  
25  
26  
27  
28  
29  
30  
31  
32  
33  
34  
35  
36  
37  
38  
39  
40  
41  
42  
43  
44  
45  
46  
47  
48  
49  
50  
51  
52  
53  
54  
55  
56  
57  
58  
59  
60

## Figure legends

Figure 1: Total projected prevalence by 2030 per 100,000 of the population for 53 Euro region countries

Figure 2: Projected prevalence of diabetes, CHD & Stroke, cancers per 100,000 of the population by 2030 by country

Figure 3: Cumulative incidence gains by 2030 by disease given a 1% or 5% reduction in population BMI relative to the baseline scenario.

Figure 4: Projected cumulative incidence cases avoided by 2030 per 100,000 of the population by country given a 5% reduction in population BMI

## Appendices

Appendix 1: A table of BMI references

Appendix 2: BMI manipulation methods

Appendix 3: Disease references

Appendix 4: Detailed statistical methods

Appendix 5: Population pyramids

Appendix 6: Data tables presenting prevalence rate, prevalence gains, cumulative incidence cases and incidence cases avoided by 2030 for each country.

1  
2  
3  
4  
5  
6  
7  
8  
9  
10  
11  
12  
13  
14  
15  
16  
17  
18  
19  
20  
21  
22  
23  
24  
25  
26  
27  
28  
29  
30  
31  
32  
33  
34  
35  
36  
37  
38  
39  
40  
41  
42  
43  
44  
45  
46  
47  
48  
49  
50  
51  
52  
53  
54  
55  
56  
57  
58  
59  
60

---

1

2           **The future burden of obesity-related diseases in the 53 WHO**

3           **European-Region countries and the impact of effective interventions:**

4                           **A modelling study.**

7           Laura Webber, Diana Divajeva, Tim Marsh, Klim McPherson, Martin Brown, Gauden Galea, Joao  
8           Breda

9           Corresponding author: Laura Webber, Deputy Director: Modelling, UK Health Forum, Fleetbank  
10           House, 2-6 Salisbury Square, London, EC4Y 8JX, UK [laura.webber@ukhealthforum.org.uk](mailto:laura.webber@ukhealthforum.org.uk)

11           Diana Divajeva, Research Associate, UK Health Forum, Fleetbank House, 2-6 Salisbury Square,  
12           London, EC4Y 8JX, UK

13           Tim Marsh, Director: Modelling, UK Health Forum, Fleetbank House, 2-6 Salisbury Square, London,  
14           EC4Y 8JX, UK

15           Klim McPherson, Emeritus Professor, New College, University of Oxford, OX1 3BN

16           Martin Brown, Senior statistician, UK Health Forum, Fleetbank House, 2-6 Salisbury Square, London,  
17           EC4Y 8JX, UK

18           Gauden Galea, Director of the Division of Noncommunicable Diseases and Life-course, WHO  
19           Regional Office for Europe, UN City; Marmorvej 51 - DK-2100 Copenhagen ø Denmark, Phone: +45  
20           30 50 8022

21           Joao Breda, Programme Manager, Nutrition, Physical Activity and Obesity WHO Regional Office for  
22           Europe, UN City; Marmorvej 51 - DK-2100 Copenhagen ø Denmark, Phone: +45 30 50 8022

24           Key words: obesity, Europe, modelling, micro-simulation

25           Running head: obesity and related diseases in 53 WHO/Europe countries

27           Disclaimer

28           Gauden Galea and João Breda are staff members of the World Health Organization. The authors alone are  
29           responsible for the content and writing of this paper, which does not necessarily represent the decisions,  
30           policy or views of the World Health Organization.

1  
2  
3  
4  
5  
6  
7 1 The Corresponding Author has the right to grant on behalf of all authors and does grant on behalf of  
8 2 all authors, a worldwide licence to the Publishers and its licensees in perpetuity, in all forms, formats  
9 3 and media (whether known now or created in the future), to i) publish, reproduce, distribute, display  
10 4 and store the Contribution, ii) translate the Contribution into other languages, create adaptations,  
11 5 reprints, include within collections and create summaries, extracts and/or, abstracts of the  
12 6 Contribution, iii) create any other derivative work(s) based on the Contribution, iv) to exploit all  
13 7 subsidiary rights in the Contribution, v) the inclusion of electronic links from the Contribution to  
14 8 third party material where-ever it may be located; and, vi) licence any third party to do any or all of  
15 9 the above.

### 16 10 17 18 11 **Competing interests**

19 12  
20 13 All authors have completed the ICMJE uniform disclosure form at [www.icmje.org/coi\\_disclosure.pdf](http://www.icmje.org/coi_disclosure.pdf)  
21 14 and declare: no support from any organisation for the submitted work; no financial relationships  
22 15 with any organisations that might have an interest in the submitted work in the previous three  
23 16 years; no other relationships or activities that could appear to have influenced the submitted work.  
24 17

### 25 18 **Transparency declaration**

26 19  
27 20 The lead author affirms that the manuscript is an honest, accurate, and transparent account of the  
28 21 study being reported; that no important aspects of the study have been omitted. Ethical approval  
29 22 was not required for this study since it is an epidemiological study reporting secondary analysis of  
30 23 data. This study was funded by the World Health Organization, Regional Office for Europe.  
31 24

### 32 25 **Data sharing**

33 26 Data used in these analyses are from published sources and can be accessed upon request  
34 27 ([laura.webber@ukhealthforum.org.uk](mailto:laura.webber@ukhealthforum.org.uk)).  
35 28

### 36 29 **Author contribution**

37 30  
38 31 LW and DD carried out the acquisition, analysis and interpretation of data for the work in this study  
39 32 and drafted the manuscript. TM, JB, KM, GG contributed to the conception and design of this study.  
40 41  
41 42  
42 43  
43 44  
44 45  
45 46  
46 47  
47 48  
48 49  
49 50  
50 51  
51 52  
52 53  
53 54  
54 55  
55 56  
56 57  
57 58  
58 59  
59 60

1  
2  
3  
4  
5  
6  
7  
8  
9  
10  
11  
12  
13  
14  
15  
16  
17  
18  
19  
20  
21  
22  
23  
24  
25  
26  
27  
28  
29  
30  
31  
32  
33  
34  
35  
36  
37  
38  
39  
40  
41  
42  
43  
44  
45  
46  
47  
48  
49  
50  
51  
52  
53  
54  
55  
56  
57  
58  
59  
60

---

1 JB, GG, TM, MB, KM revised the document for important intellectual content.  
2 All authors edited and approved the final version of this manuscript and agree to be accountable for  
3 all aspects of the work in ensuring that questions related to the accuracy or integrity of any part of  
4 the work are appropriately investigated and resolved.  
5

For peer review only

## Abstract

**ObjectiveBackground:** Non-communicable diseases (NCDs) are the biggest cause of death in Europe putting unsustainable burden on already struggling health systems. Increases in obesity are a major cause of NCDs. This paper projects the future burden of Coronary Heart Disease (CHD), stroke, type 2 diabetes and seven cancers to 2030 in all 53 WHO European Region countries based on current and past obesity body mass index (BMI) trends. It also tests the eventual impact of effective obesity interventions upon the future disease burden.

**Setting and participants:** Secondary data analysis of country-specific epidemiological data using a microsimulation modelling process.

**Interventions:** The effect of three hypothetical scenarios on the future burden of disease in 2030 were tested: baseline scenario, BMI trends go unchecked; intervention 1, population BMI trends decreases by 1%; intervention 2, BMI levels decreases by 5%.

**Primary and secondary outcome measures:** Quantifying the future burden major NCDs and the impact of interventions on this future disease burden.

**Results:** By 2030 in the whole of the European region the prevalence rates of diabetes, CHD & stroke and cancers are projected to reach an average of 3990, 4672 and 2046 cases per 100,000 respectively. The highest prevalence of diabetes was predicted in Slovakia (10,870 cases per 100,000); CHD & stroke – in Greece (11,292) and cancers – in Finland (5615 cases per 100,000). A 5% fall in population BMI was projected to significantly reduce cumulative incidence of diseases. The largest reduction in diabetes and CHD & stroke was observed in Slovakia (3054 and 3369 cases per 100,000 respectively) and in cancers was predicted in Germany (331 per 100,000).

**Conclusions:** Modelling future disease trends is important for policy makers in realistically allocating resources and implementing policies that prevent disease incidence NCDs. Future research will allow real policy interventions to be tested, however better surveillance data on NCDs and their risk factors are essential for research and policy.

Formatted: Normal

## Strengths and limitations

### Strengths

- This study projects the future burden of obesity-related diseases using sophisticated microsimulation modelling software
- It quantifies the impact on major chronic diseases (CHD, stroke, Type 2 diabetes, cancers) given a 1 or 5% reduction in population BMI
- It highlights the need for good quality surveillance data for diseases and their risk factors so that accurate estimates can be made

### Limitations

- The model does not take account of future changes in circumstances such as fluctuations in food prices or new medical technologies.
- The model is only as good as the data that are entered into it, with good quality data more accurate predictions can be made

### Background

Noncommunicable diseases (NCD) such as cardiovascular and respiratory disease are the highest cause of death globally (1). In 2008 the World Health Organization (WHO) estimated that mortality from ~~diseases such as~~ heart disease, stroke, chronic lung disease, cancer and diabetes totalled 36.1 million (2). [The growing burden of NCDs warranted urgent political action. In September 2011 during the UN High Level Meeting on NCDs As a result,](#) global leaders made a political declaration to provide a coordinated response ~~to for~~ preventing and controlling NCDs ~~at the UN High Level Meeting on NCDs in September 2011~~ (3). ~~NAs a result~~ nine global voluntary targets ~~aiming at combatting global mortality from the four main NCDs, accelerating action against the leading risk factors for NCDs and strengthening national health system responses were set out were set that aimed to reduce NCDs. The 25 by 25 mortality goal pledges to reduce premature mortality from NCD by 25% by 2025~~ (4).

[In Europe NCDs are high on the European parliament's agenda as they account for 86% of deaths and 77% of disease burden \(2\).](#) ~~since they account for 86% of deaths and 77% of disease burden (2),~~ [This burden is unequally distributed both within and between the European countries: individuals from the most disadvantaged groups often have poorer access to health care and fewer resources such as education, employment, and housing – all of which reduce the opportunities for healthy lifestyle choices. The new European health policy framework, and this burden is addressed in Health 2020, the new European Policy \(5\).](#) Health 2020, highlights [these inequalities and offers a roadmap for the policy makers and public health professionals \(5\).](#) ~~the stark inequality in across Europe,~~

Formatted: Space Before: 10 pt, Line spacing: Multiple 1.15 li

1  
2  
3  
4  
5  
6  
7 1 where the risk of NCDs is higher in individuals from the most disadvantaged groups since they have  
8 2 poorer access to health care and fewer resources such as education, employment, and housing  
9 3 making choosing healthy lifestyles more difficult. The WHO European Region is determined to take  
10 4 forward the UN political declaration to reduce avoidable deaths from NCDs turning the declaration  
11 5 into action and the WHO is working to provide public health tools that help all countries across the  
12 6 broader European region to implement more effective programmes based on an extensive reflection  
13 7 process (5).

14 8 The causes of NCDs are may be genetic, behavioural and environmental (6). Rapid changes in health  
15 9 related behaviours in recent decades have seen an upsurge in NCD prevalence (7) through  
16 10 modifiable lifestyle factors such as diet and exercise. Market forces driving down costs of high  
17 11 calorie fatty, salty and sugary foods have made them cheap and readily available resulting in  
18 12 increased consumption and expanding waistlines. In addition, advances in technology such as  
19 13 motorised transport, labour mechanisation and television have promoted sedentary lifestyles and  
20 14 reduced physical activity (8). Interventions that are able to tackle important risk factors such as  
21 15 obesity are likely to have a positive impact upon NCD prevalence and premature mortality caused by  
22 16 NCDs.

23 17 Projections from the UK show that behavioural interventions can be effective in reducing future  
24 18 incidence of diseases such as coronary heart disease, stroke, type 2 diabetes and some cancers. For  
25 19 example, reducing body mass index (BMI) by 1% across the population (equivalent to 1kg weight  
26 20 loss) was estimated to substantially reduce health burden, saving 179,000-202,000 incident cases of  
27 21 type 2 diabetes, 122,000 cases of cardiovascular diseases and 32,000-33,000 incident cases of cancer  
28 22 over 20 years (9). Data from Russia showed that obesity rates are predicted to increase to as high as  
29 23 76% in males by 2050, and rates of CHD and stroke will reach 12,723 cases per 100,000 of the  
30 24 population (10). Similar projections have been carried out implemented in other European countries  
31 25 (11); though to our knowledge estimates of the future burden of obesity-related diseases in all  
32 26 European countries have not been carried out.

33 27 There is, therefore a new threat menacing recent progress in NCD mortality and morbidity which  
34 28 needs to be quantified and the current study ignites this discussion within the context of health  
35 29 impact models. This study also hypothesises that while reduction in the burden of NCDs has been  
36 30 sustained, obesity is actually threatening those gains. As such this study updates and extends this  
37 31 work by using a microsimulation model to project NCD trends to 2030 in all 53 Euro-region countries  
38 32 and assesses the impact of two hypothetical interventions, intervention 1: a 1% reduction in

1 population BMI and intervention 2: a 5% reduction in population BMI, upon the future incidence of  
2 CHD and stroke, type 2 diabetes and obesity-related cancers.

## 3 4 **Methods**

### 5 6 *BMI data extraction*

7  
8 Online databases (Global database on Body Mass Index (12), EU members' statistical office  
9 databases, Pubmed (13) and Science Direct (14)) were searched for published data on age and sex-  
10 specific country obesity prevalence data presented according WHO definitions of normal weight,  
11 overweight and obesity (12). ~~In addition, A~~ article references were ~~also searched~~ probed and  
12 individual researchers and public health officers were contacted for further data ~~(see Webber et al,~~  
13 ~~in prep)~~. A table of BMI references is presented in A appendix 1 and methods of BMI data  
14 manipulation are explained in A appendix 2a-b of the supplementary information.

### 15 16 *Disease data sources*

17  
18 A second review of statistical databases and literature was carried out to locate country-specific  
19 incidence, prevalence, survival and mortality data for CHD, stroke and obesity-related cancers  
20 (colorectal, pancreas, breast, kidney, liver, corpus uteri and oesophageal) as well as incidence and/or  
21 prevalence data of type 2 diabetes.

22 Where prevalence, but not incidence, data were available by age and sex the prevalence was  
23 converted to incidence using equations devised for DISMOD II software (15). Briefly, Incidence is  
24 calculated from prevalence using a Downhill Simplex Method (16), where the algorithm determines  
25 the incidence iteratively using a best fit to the known prevalence.

26  
27 Where neither incidence nor prevalence data were available data from a proxy country were used.  
28 CHD incidence was often rare, so UK, Georgia, Spain, Russia, Uzbekistan incidence data were used as  
29 proxies for countries ins a similar geographical location or countries which had comparable average  
30 prevalence rates. For example, for CHD data Russian data were used as a proxy for Belarus; and  
31 Uzbekistan data were used for Kazakhstan, Kyrgyzstan, Tajikistan, ~~Turkmenistan~~ and Turkmenistan.

7

**Formatted:** Font: (Default) +Body (Calibri),  
Not Bold, Font color: Auto, Not Highlight

**Formatted:** Font: +Body (Calibri), Not Bold,  
Font color: Auto

**Formatted:** Font color: Auto



1  
2  
3  
4  
5  
6  
7 [Only Belarus, Denmark, Finland, Ireland, Norway, Russian Federation and the UK had full sets of](#)  
8 [disease data. Furthermore, many countries required a proxy for survival data.](#) Greater detail of  
9  
10 which countries were used as proxies is presented in Appendix 3. For fatal diseases the ratio of the  
11  
12 target-to-proxy countries' mortality rates was used to scale the proxy country's incidence rates. For  
13  
14 type 2 diabetes proxy country data were adjusted for the different population BMI-distributions. [For](#)  
15 [example, if country x had diabetes data and these were used a proxy for country y where no data](#)  
16 [exist, then country y's BMI distribution would determine the future burden of type 2 diabetes via the](#)  
17 [relative risk.](#)

18  
19 For survival data, the probability of survival,  $p$ , for a number of years,  $T$ , after acquiring a fatal  
20  
21 disease was modelled in one of two ways depending on the disease. Either as a simple exponential  
22  
23 distribution  $p=e^{-RT}$ , or as an exponential distribution allowing for different probability,  $p_1$ , of survival  
24  
25 in the first year,  $p=p_1e^{-R(T-1)}$ . Stroke used the latter model; other fatal diseases the former. Disease  
26  
27 survival statistics consist of the rate  $R$  or the rate  $R$  together with the first year survival probability  
28  
29  $p_1$ . These statistics [are can be](#) further classified by age group and gender. The rate  $R$  was usually  
30  
31 inferred from quoted 5-year survival statistics.

32  
33 The relative risks of contracting each disease according to pre-obesity (BMI 25-29.9 kg/m<sup>2</sup>) and  
34  
35 obesity (BMI 30≥ kg/m<sup>2</sup>) relative to normal weight (BMI 18.5-24.9 kg/m<sup>2</sup>) [with age and sex as](#)  
36  
37 [covariates](#) were taken from the International Association for the Study of Obesity ([1617](#)).

38  
39 A table of disease references for each country is presented in [Appendix 3](#).

## 40 [Statistical analysis](#)

41  
42 Detailed statistical analysis is described in [Appendix 4](#), Foresight: Tackling Obesities ([1718](#)) and  
43  
44 Wang and colleagues (9). [Briefly, A](#) dual-module modelling process was carried out: [m](#)Module one  
45  
46 fits cross-sectional BMI data from each country using a non-linear multivariate, categorical  
47  
48 regression model. Module two creates virtual country cohorts of 5,000,000 individuals using a  
49  
50 microsimulation method to produce longitudinal projections to 2030 based on module one BMI  
51  
52 distributions. Microsimulation is a computer modelling technique that works at the level of the  
53  
54 individual; it generates individual life-histories of a specified population and this population reflects  
55  
56 the age profile, birth, death and health statistics to make future projections. [A](#) BMI value is  
57  
58 probabilistically assigned as a function of age, sex and calendar year and an individuals' BMI  
59  
60 percentile in the same age cohort assumed to stay the same over time. Population size, births and  
deaths were also simulated in a large number of individuals as they age using data from the United

1 Nations population statistics (4819). Population pyramids are presented in [Appendix 5](#). Within the  
2 simulation, individuals are at greater risk of getting a particular disease each year if he or she did not  
3 have the disease at the beginning of the year. Individuals can continue living with the disease or die  
4 from it (if it is fatal). The software for this program was written in C++ (4920).

5 To estimate the disease burden associated with the trends in overweight and obesity, as well as the  
6 effect of possible interventions, future increases in obesity-related diseases were projected from  
7 2010 to 2030, using three different trend interventions: ~~intervention 0~~ baseline scenario: obesity-BMI  
8 trends- go unchecked; intervention 1: ~~obesity levels~~ mean population BMI decreases by 1% and  
9 intervention 2: ~~mean population BMI~~ obesity levels decreases by 5%. The cumulative incidence cases  
10 avoided for the whole of Europe was analysed by summing the weighted average of incidence for  
11 each country.

## 12 Results

13  
14 Only 36 countries had three or more years of BMI data. Less than or equal to two points of BMI data  
15 were available for the remaining 17 countries (Albania, Andorra, Belarus, Bosnia, Croatia, Cyprus,  
16 Georgia, Hungary, Macedonia, Monaco, Montenegro, Romania, San Marino, Serbia, Slovenia,  
17 Tajikistan and Turkmenistan) so results in this instance are interpreted with caution.

18 Alongside obesity, obesity-related diseases are projected to increase in almost all countries. Figure 1  
19 presents the average projected prevalence rates for Europe (weighted for total population) by  
20 intervention. A 1% reduction in population BMI would result in an average of 1575 CHD & stroke  
21 prevalence cases per 100,000 of the population in Europe. This is a prevalence gain of 29 cases per  
22 100,000, equating to a 1.8% reduction. A 5% reduction in population BMI would result in an average  
23 of 2021 cases of type 2 diabetes by 2030 per 100,000 of the population in 2010. This is a reduction in  
24 prevalence of 333 cases per 100,000, equating to a 16% reduction across Europe relative to  
25 intervention 0 (rates continue unabated). Relative to the baseline scenario (no intervention to  
26 reduce population BMI) a 1% reduction in BMI would result in an average of 3990 and 3807 type 2  
27 diabetes prevalence cases per 100,000 of the population in Europe respectively. This is a prevalence  
28 gain of 183 cases per 100,000, equating to a 4.6% reduction in prevalence. A 5% reduction in  
29 population BMI would result in an average of 3411 cases of type 2 diabetes by 2030 per 100,000 of  
30 the population in 2010. This is a reduction in prevalence of 579 cases per 100,000, equating to a  
31 14.5% reduction across Europe. There was wide variability between countries.

Figure 2 shows the projected prevalence to 2030 of each disease by country per 100,000 of the population in 2010. [There was a wide variability between countries.](#) The highest projected prevalence of cancers was observed in Finland with 5615 cases per 100,000 of the population in 2010. The highest projected prevalence of CHD and stroke was observed in Greece with 11,292 cases and the highest projected prevalence of type 2 diabetes was in Slovakia with 10,870 cases per 100,000 of the population in 2010.

Figure 3 presents the European average cumulative incidence gains by 2030 for each disease given a 1% or 5% reduction in population BMI relative to ~~intervention 0 the baseline scenario (rates continue unabated)~~. [As expected, higher reductions of population BMI would result in a number of obesity-related disease cases being avoided by 2030.](#) A 1% reduction in BMI would result in an average [reduction of 56 365 cases of cancer, CHD and stroke per 100,000 of the population in 2010 being gained](#) by 2030. A 5% reduction in population BMI would result in the avoidance of [4453-1317](#) cumulative incidence cases of CHD and stroke per 100,000 of the population ~~by 2030~~.

[Figure 4 presents cumulative incidence cases avoided in each of the 53 WHO European region countries if population BMI is reduced by 5%. The highest reduction in CHD and stroke and type 2 diabetes was predicted in Slovakia with 3054 and 3369 cumulative incidence cases per 100,000 population avoided by 2030 respectively. The highest reduction in cumulative incidence of obesity-related cancers was projected in Germany with 331 cases per 100,000 avoided by 2030.](#)

Data tables for each country displaying cumulative incidence cases, cumulative incidence cases avoided, prevalence cases and prevalence cases avoided per 100,000 of the population are presented in [Appendix 6](#).

## Conclusions

This study used a microsimulation model to test the impact of effective interventions that reduce population BMI upon the future burden of disease. With only a few exceptions, obesity rates across the 53 countries were projected to increase by 2030. This is worrying given the extent of the related disease burden associated with obesity. There appeared to be very little pattern to the projected disease trends regionally across Europe.

Because of increasing obesity trends our findings suggest that in 20 years an increasing number of people will be living with an obesity-related chronic disease in almost every county in Europe.

1  
2  
3  
4  
5  
6  
7 Interestingly, there was sometimes a rapid increase from 2010 to 2020 then a steadier increase to  
8 2030. Birth rates are low across Europe with most total fertility rates (TFR) below 2. This means that  
9 the population is ageing with fewer young people. Only Azerbaijan (2.12), Israel (2.62), Tajikistan  
10 (3.13) and Uzbekistan (2.19) have TFRs above 2. Projecting further we may observe a dip in  
11 prevalence rates as those with the disease die while there are fewer younger people to contract the  
12 disease. Differences in the population profiles across countries may therefore result in different  
13 estimates even if current disease incidence is comparable. Population profiles for each country are  
14 illustrated in [Appendix 5](#) of the supplementary information.

15 Obesity-related cancers are rare and have relatively low rates compared with the other diseases.  
16 However, rates are projected to increase. Recent trends in cancer survival across Europe between  
17 2000 and 2004 reported that the survival of breast cancer was lower in Eastern Europe (Poland,  
18 Estonia, ~~Slovenia~~ and Slovenia) than elsewhere in Europe (2021). Screening and medical advances  
19 and less varied access to effective treatment are likely to account for differences with-between  
20 Eastern Western and Western regions in Europe.

21 Obesity is closely linked with insulin resistance and recent years has recent years have seen an  
22 epidemic of type 2 diabetes evolve alongside rapid increases in obesity. In the UK alone, a continued  
23 increase in obesity is projected to add 6-8.5 million incidence cases of type 2 diabetes by 2030, at a  
24 substantial cost to the UK health system (9). Rates of ~~Coronary Heart Disease~~ CHD and ~~S~~stroke too  
25 were projected to increase across most countries. Highest prevalence rates were seen in Greece  
26 (11,292 per 100,000 population) and the lowest in Spain (1030 per 100,000 population). However,  
27 since very little CHD data were available, UK data was often used as a proxy, possibly  
28 underestimating the rates of CHD in Europe. Where data were available (e.g. Ireland, Finland) much  
29 higher rates were predicted suggesting that rates may be underestimated when using UK data and  
30 interpretation of proxy data should be made with caution. Data for stroke incidence was mostly  
31 taken from estimates by Truelson and colleagues (2122). These data were compared with Estonia  
32 from the 2007 Tartu ~~s~~stroke registry (2223) and appear to be slightly inflated. Similarly, rates were  
33 higher in the Truelson estimates compared with Polish data from 2005-2006 so rates of stroke  
34 incidence maybe slightly overestimated.

35 Quantification of the burden of NCDs is important both to patients and public health professionals  
36 because of the long-term consequences to patients' functioning and demand for health care (2324).  
37 However, quantification via microsimulation is dependent upon good quality surveillance data. ~~yet~~  
38 ~~the~~ present study highlights the lack of up-to-date surveillance data – especially annual measured  
39 BMI from the same survey and disease incidence data. These data are necessary if national policies

1  
2  
3  
4  
5  
6  
7 1 to control NCDs are to be appraised objectively. For some countries no satisfactory BMI data were  
8 2 available so proxy country data were used (in the case of Member States with very small  
9 3 populations) or extrapolated from mean data (in the case of other countries). Some of the trends  
10 4 shown by the analysis have large confidence intervals due to the small number of data points used  
11 5 as well as the small sample sizes of some of the studies, and therefore the observed trends can only  
12 6 be indicative. Ideally the data should be measured, but for most countries ~~we had to use the only~~  
13 7 studies ~~available were the ones~~ in which anthropometry had been self-reported. This weakens the  
14 8 analysis, particularly if used in combination with measured data, because people tend to  
15 9 underreport their weight in interviews or surveys (2425).

16 10 Relative risk data may also be limited in the extent to which they estimate the true impact of BMI on  
17 11 disease. Relative risks were taken from the International Association for the Study of Obesity (16) as  
18 12 these were deemed the best available at the time of development of the country models. However,  
19 13 there are limitations to these risks due to the lack of suitable meta-analyses used to calculate them.  
20 14 ~~It was assumed that the relative risk estimates are the same for all age groups since data were not~~  
21 15 ~~always available by ag.~~ They are also based on both measured and self-reported data and do not  
22 16 account for ethnic differences in body composition ~~since they are based on largely wWhite~~  
23 17 ~~populations.~~ In the present study we included the same relative risk for each Member State;  
24 18 however given the paucity of epidemiological data on both BMI and disease within many of the  
25 19 countries of interest it is unknown whether this assumption is valid.

26 20 Increased surveillance and monitoring of NCDs is one of the six key objectives of the WHO 2008-  
27 21 2013 Global strategy for the Prevention and Control of Non-communicable Diseases (2526)(24). This  
28 22 strategy aims to target governments in making policies that control and abate the increasing  
29 23 prevalence of NCDs across Europe and our results provide further evidence for raising the priority of  
30 24 NCD prevention. In particular, this study promotes the need for interventions that are effective in  
31 25 reducing major NCD risk factors (objective 3 of the strategy). In addition to this, in early 2013 the  
32 26 WHO formed a global monitoring framework which aims to track the progress of prevention of  
33 27 major non-communicable diseases and their key risk factors and consists of nine global targets and  
34 28 25 indicators adopted by the WHO Member States during the 66th World Health Assembly in May  
35 29 2013.

36 30 The microsimulation models are easily adaptable to include new data when it becomes available  
37 31 from such strategies. For example, we were not able to include data on children because of the  
38 32 limited amount of standardised data but with initiatives such as the WHO Childhood Obesity  
39 33 Surveillance Initiative (2627)(25) assessment of future childhood obesity trends will be possible.

Formatted: Font: (Default) +Body (Calibri),  
Not Bold, Font color: Auto, Not Highlight

1  
2  
3  
4  
5  
6  
7 ~~This study tested hypothetical, and largely aspirational scenarios. However, it serves to demonstrate~~  
8 ~~the value of modelling to quantify the estimated future health burden of risk factors. If data are~~  
9 ~~available the model can test the long term effectiveness of real policy interventions and future work~~  
10 aims to do this ([ecodapproject.eu28](http://ecodapproject.eu28)).

11  
12  
13  
14 ~~The models can also forecast future healthcare costs and the cost-effectiveness of specific~~  
15 ~~interventions since our model incorporates our sophisticated economic module. Withrow and Alter~~  
16 ~~(26) carried out a systematic review of the direct costs of obesity and found that obesity accounted~~  
17 ~~for 0.7-2.8% of a countries total healthcare cost. Further, obese individuals have 30% higher~~  
18 ~~healthcare costs than non-obese individuals though little published data on healthcare costs exists.~~  
19 ~~Another important point of future work is to explore joint risk factors such as tobacco, physical~~  
20 ~~activity and alcohol. Integration of these would be a valuable next step in quantifying the total life-~~  
21 ~~style related disease burden.~~

22  
23  
24  
25  
26  
27  
28  
29  
30  
31  
32  
33  
34  
35  
36  
37  
38  
39  
40  
41  
42  
43  
44  
45  
46  
47  
48  
49  
50  
51  
52  
53  
54  
55  
56  
57  
58  
59  
60

13 A key assumption of the model is that people do not reverse in the BMI categories. At a population  
14 level this generally reflects reality, where weight loss is often only temporary. However this  
15 assumption does not take into account future changes in circumstances, such as fluctuations in  
16 food prices. It relies on our best estimate based on previous trends. That said, this approach allows  
17 for future trends to be forecast so that policy makers can plan interventions and allocate resources  
18 appropriately.

19 It is clear that tackling NCDs ~~and obesity~~ is a major challenge across Europe placing unsustainable  
20 burden on struggling health systems. ~~This study provides a picture of the future with projections,~~  
21 ~~and observes a worsening situation with increasing incidence of obesity-related disease. As a result,~~  
22 ~~these findings call for Ggovernments need to plan ahead and~~ initiate change that effectively  
23 reduces key risk factors ~~such as like~~ obesity through preventative measures such as food tax, industry  
24 pledges and reduced junk food marketing. ~~that may go some way into reducing obesity-related~~  
25 ~~mortality. Examples of which may include taxing and regulating unhealthy products and reducing~~  
26 ~~junk food advertising.~~ Primary prevention is crucial if increasing trends are to be averted ([2729](#))(27).

#### Panel: Research in context

30 Noncommunicable diseases (NCD) are the biggest cause of death in Europe. Health impact models  
31 are a useful and important policy tool enabling ~~to measurement of~~ the future burden of NCDs ~~to be~~

Formatted: Font: (Default) +Body (Calibri), Not Bold, Not Italic, Font color: Auto

Formatted: Font: (Default) +Body (Calibri), Not Bold, Not Italic, Font color: Auto

Formatted: Font: (Default) +Body (Calibri), Not Bold, Not Italic, Font color: Auto

Formatted: Font: (Default) +Body (Calibri), Not Bold, Not Italic, Font color: Auto

Formatted: Font: (Default) +Body (Calibri), Not Bold, Not Italic, Font color: Auto

Formatted: Font: (Default) +Body (Calibri), Not Bold, Not Italic, Font color: Auto

Formatted: Font: (Default) +Body (Calibri), Not Bold, Not Italic, Font color: Auto

1  
2  
3  
4  
5  
6  
7 1 quantified. Obesity is a major modifiable risk factor ~~of for~~ NCDs, which makes it necessary to  
8 2 quantify and this threat ~~is necessary to be quantified~~. The current study explored the future impact  
9 3 of changing trends in ~~obesity BMI~~ on the future burden of NCDs to 2030. Effective interventions that  
10 4 successfully reduced population BMI by 1% or 5% would have a significant impact upon obesity-  
11 5 related diseases such as cardiovascular disease, type 2 diabetes and some cancers.

12 6  
13 7 Microsimulation modelling should be utilised by policy makers so they can plan for the future  
14 8 provision of health care resources and instigate and maintain interventions that prevent the onset of  
15 9 debilitating NCDs at both an individual and national level.

## 16 10 17 11 18 12 19 13 20 14 21 15 22 16 23 17 24 18 25 19 26 20 27 21 28 22 29 23 30 24 31 25 32 26 33 27 34 28 35 29 36 30 37 31 38 32 39 33 40 34 41 35 42 36 43 37 44 38 45 39 46 40 47 41 48 42 49 43 50 44 51 45 52 46 53 47 54 48 55 49 56 50 57 51 58 52 59 53 60 54

- 16 (1) Imperial College London. Global Burden of Metabolic Risk Factors of Chronic Diseases.  
17 [www5.imperial.ac.uk/medicine/metabolic\\_risks/bmi/](http://www5.imperial.ac.uk/medicine/metabolic_risks/bmi/) (accessed May 20, 2013).
- 18 (2) World Health Organization. Global Status Report on NCDs.  
19 [www.who.int/chp/ncd\\_global\\_status\\_report/en/](http://www.who.int/chp/ncd_global_status_report/en/) (accessed April 15, 2013).
- 20 (3) General Assembly of the United Nations. UN High Level Meeting Non-Communicable  
21 Diseases. [www.un.org/en/ga/president/65/issues/ncdiseases.shtml](http://www.un.org/en/ga/president/65/issues/ncdiseases.shtml) (accessed June 1 2013)
- 22 (4) World Health Organization. NCD Global Monitoring Framework.  
23 [www.who.int/nmh/global\\_monitoring\\_framework/en/](http://www.who.int/nmh/global_monitoring_framework/en/) (accessed June 1, 2013)
- 24 (5) World Health Organization Regional Office for Europe. The new European policy for health.  
25 Health 2020: vision, values, main directions and approaches.  
26 [http://www.euro.who.int/\\_data/assets/pdf\\_file/0007/147724/wd09E\\_Health2020\\_111332](http://www.euro.who.int/_data/assets/pdf_file/0007/147724/wd09E_Health2020_111332.pdf)  
27 [.pdf www.who.int/nmh/global\\_monitoring\\_framework/en/](http://www.who.int/nmh/global_monitoring_framework/en/) (accessed June 4 2013)
- 28 (6) Shuldiner AR. Obesity genes and gene-environment-behavior interactions:  
29 recommendations for a way forward. Obesity 2008; Suppl 3: S79-S81.

1  
2  
3  
4  
5  
6  
7  
8  
9  
10  
11  
12  
13  
14  
15  
16  
17  
18  
19  
20  
21  
22  
23  
24  
25  
26  
27  
28  
29  
30  
31  
32  
33  
34  
35  
36  
37  
38  
39  
40  
41  
42  
43  
44  
45  
46  
47  
48  
49  
50  
51  
52  
53  
54  
55  
56  
57  
58  
59  
60

(7) World Health Organization. Diet, Nutrition and the prevention of Chronic Disease. 2003; [http://whqlibdoc.who.int/trs/who\\_trs\\_916.pdf](http://whqlibdoc.who.int/trs/who_trs_916.pdf) (accessed February 10, 2013)

(8) Jones A, Bentham G, Foster C, Hillsdon M, Panter J. Foresight Tackling Obesities: Future Choices - Obesogenic Environments - Evidence Review. 2007; Government Office for Science. [www.bis.gov.uk/assets/foresight/docs/obesity/03.pdf](http://www.bis.gov.uk/assets/foresight/docs/obesity/03.pdf) (accessed January 23, 2013)

(9) Wang YC, McPherson K, Marsh T, Gortmaker SL, Brown M. Health and economic burden of the projected obesity trends in the USA and the UK. *Lancet* 2011; **378**:815-25.

(10) Rtveladze K, Marsh T, Webber L, Kilpi F, Goryakin Y, Kontsevaya A et al. Obesity trends in Russia. The impact on health and healthcare costs . *Health* 2012; **4**:1471-84.

(11) Webber L, Kilpi F, Marsh T, Rtveladze K, McPherson K, Brown M. Modelling obesity trends and related [diseases in Eastern Europe. Obesity Reviews 2012; 13\(8\):744-51](#)

(12) World Health Organization. Global database on body mass index. <http://apps.who.int/bmi/> (accessed March 3, 2012).

(13) National Institute of Health. Pubmed.gov US National Library of Medicine. <http://www.ncbi.nlm.nih.gov/pubmed> (accessed March 2, 2013).

(14) Elsevier. Science Direct. [www.sciencedirect.com](http://www.sciencedirect.com) (accessed June 15, 2012)

(15) World Health Organization. DISMOD II. [www.who.int/healthinfo/global\\_burden\\_disease/tools\\_software/en/](http://www.who.int/healthinfo/global_burden_disease/tools_software/en/) (accessed November 28, 2012)

(16) Nelder J.A., and Mead, R.1965, "A simplex Method for Function Minimization", *Computer Journal*, vol7, pp308-313

(1617) International Association for the Study of Obesity. Estimated relative risk of disease by BMI category: overweight and obesity.

**Formatted:** Font: (Default) +Body (Calibri), Not Bold, Font color: Auto

**Formatted:** Font: +Body (Calibri)

**Formatted:** Font: (Default) +Body (Calibri), Not Bold, Font color: Auto

**Formatted:** Font: (Default) +Body (Calibri), 11 pt, Not Bold

**Formatted:** Font: +Body (Calibri)

**Formatted:** Font: Not Bold, Font color: Auto, Not Highlight



- 1  
2  
3  
4  
5  
6  
7 1 [www.iaso.org/site\\_media/uploads/Appendix\\_Relative\\_Risk\\_Assessments\\_IASO.pdf](http://www.iaso.org/site_media/uploads/Appendix_Relative_Risk_Assessments_IASO.pdf)  
8 2 (accessed November 20, 2012)  
9 3  
10 4  
11 4 (1718) McPherson K, Marsh T, Brown M. Foresight report on obesity. *Lancet* 2007; **37**: 1755.  
12 5 (1819) United Nations Department of Economics and Social Affairs. World Population Prospects,  
13 6 the 2010 Revision. <http://esa.un.org/wpp/> (accessed 10 June 2012).  
14 7  
15 8 (1920) Embarcadero Technologies. embarcadero. [www.embarcadero.co.uk/](http://www.embarcadero.co.uk/) (accessed June 10,  
16 9 2013).  
17 10  
18 11 (2021) Gondos A, Bray F, Brewster DH, Coebergh JW, Hakulinen T, Janssen-Heijnen ML et al. Recent  
19 12 trends in cancer survival across Europe between 2000 and 2004: a model-based period  
20 13 analysis from 12 cancer registries. *Eur J Cancer* 2008; **44**: 1463-75.  
21 14 (2122) Truelsen T, JBBRMCBJBG et al. Stroke Incidence and Prevalence in Europe: a Review of  
22 15 Available Data. *European Journal of Neurology* 2006 Jun;13(6):581-98.  
23 16 (2223) Vibo R, Korv J, Roose M. The Third Stroke Registry in Tartu, Estonia, from 2001 to 2003. *Acta*  
24 17 *Neurol Scand* 2007 Jul;116(1):31-6.  
25 18 (2324) Van Den Bos. The burden of chronic diseases in terms of disability, use of health care and  
26 19 healthy life expectancies. *European journal of public health* 1995;5:29-34.  
27 20 (2425) Visscher TL, Viet AL, Kroesbergen IH, Seidell JC. Underreporting of BMI in adults and its  
28 21 effect on obesity prevalence estimations in the period 1998 to 2001. *Obesity (Silver Spring)*  
29 22 2006; **14**, 2054-63.  
30 23 (2526) World Health Organization. 2008-2013 Action Plan for the Global Strategy for the Prevention  
31 24 and Control of Noncommunicable Diseases. Geneva, Switzerland: WHO document  
32 25 production services [www.who.int/nmh/publications/9789241597418/en/](http://www.who.int/nmh/publications/9789241597418/en/) (accessed June 1,  
33 26 2013).  
34 27 (2627) World Health Organization. Childhood Obesity Surveillance Initiative.  
35 28 [www.euro.who.int/en/what-we-do/health-topics/disease-](http://www.euro.who.int/en/what-we-do/health-topics/disease-)

1  
2  
3  
4  
5  
6  
7 1 [prevention/nutrition/activities/monitoring-and-surveillance/who-european-childhood-](http://www.euro.who.int/en/what-we-do/what-we-monitor/monitoring-and-surveillance/who-european-childhood-obesity-surveillance-initiative-cosi)  
8 2 [obesity-surveillance-initiative-cosi](http://www.euro.who.int/en/what-we-do/what-we-monitor/monitoring-and-surveillance/who-european-childhood-obesity-surveillance-initiative-cosi) (accessed May 2, 2012).

9  
10  
11 3 [\(28\) Economics of chronic diseases. Project overview. http://www.econdaproject.eu/ \(accessed](http://www.econdaproject.eu/)  
12 4 [January 14, 2014\)](http://www.econdaproject.eu/)

13  
14 5 [\(2729\) World Health Organization. Global Status Report on NCDs 2011 - chapter 7.](http://www.who.int/chp/ncd_global_status_report/en/)  
15 6 [www.who.int/chp/ncd\\_global\\_status\\_report/en/](http://www.who.int/chp/ncd_global_status_report/en/) (accessed June 2, 2013).

16  
17 7  
18 8 [\(29\) Patel J.K. and Read C.B. Handbook of the Normal Distribution, 2<sup>nd</sup> edition. Mathematics: CRC](#)  
19 9 [Press 1996.](#)

## 10 11 **Appendices**

12  
13 Appendix 1: A table of BMI references

14 Appendix 2: BMI manipulation methods

15 Appendix 3: Disease references

16 Appendix 4: Detailed statistical methods

17 Appendix 5: Population pyramids

18 Appendix 6: Data tables presenting prevalence rate, prevalence gains, cumulative incidence cases  
19 and incidence cases avoided by 2030 for each country.

1  
2  
3  
4  
5  
6  
7  
8  
9  
10  
11  
12  
13  
14  
15  
16  
17  
18  
19  
20  
21  
22  
23  
24  
25  
26  
27  
28  
29  
30  
31  
32  
33  
34  
35  
36  
37  
38  
39  
40  
41  
42  
43  
44  
45  
46  
47  
48  
49  
50  
51  
52  
53  
54  
55  
56  
57  
58  
59  
60

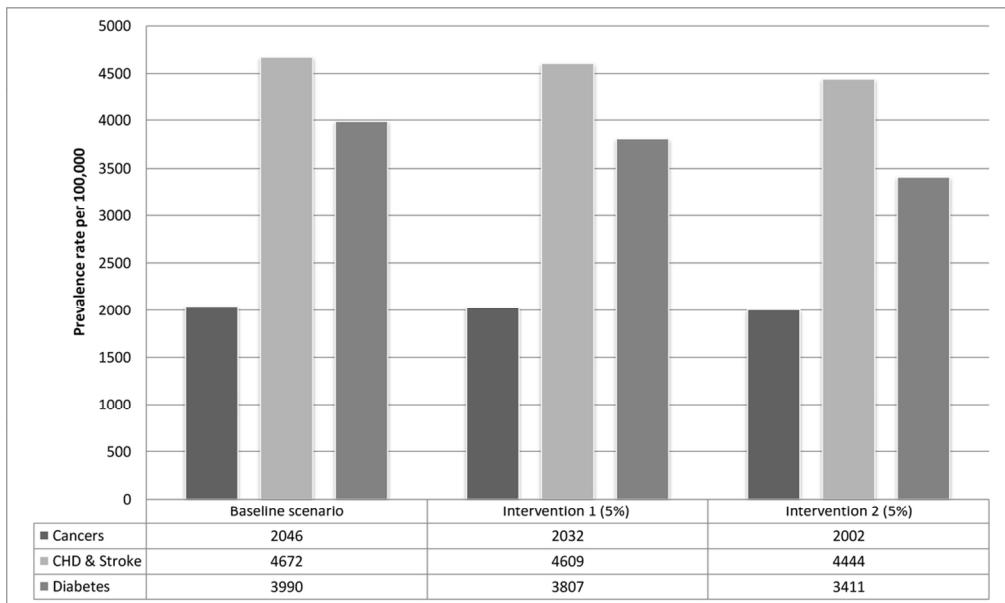

Total projected prevalence by 2030 per 100,000 of the population for 53 Euro region countries  
104x62mm (300 x 300 DPI)

Review only

1  
2  
3  
4  
5  
6  
7  
8  
9  
10  
11  
12  
13  
14  
15  
16  
17  
18  
19  
20  
21  
22  
23  
24  
25  
26  
27  
28  
29  
30  
31  
32  
33  
34  
35  
36  
37  
38  
39  
40  
41  
42  
43  
44  
45  
46  
47  
48  
49  
50  
51  
52  
53  
54  
55  
56  
57  
58  
59  
60

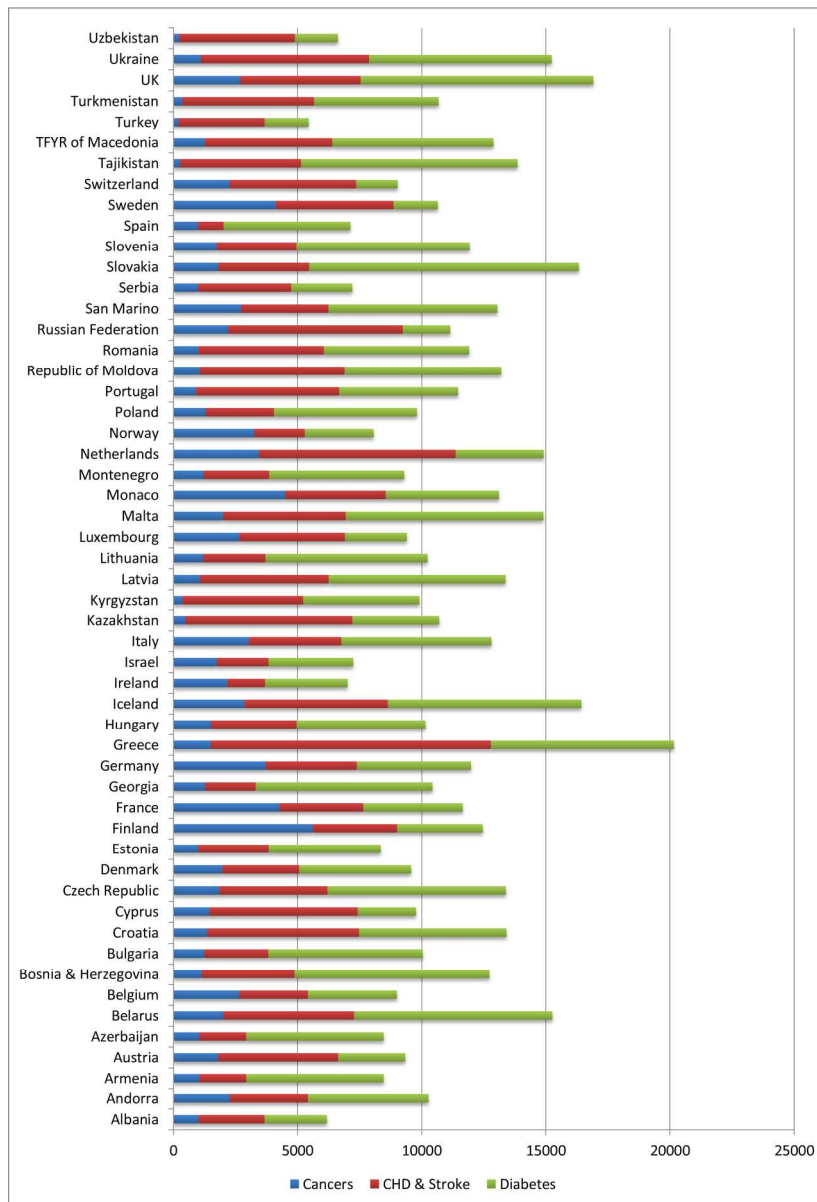

Projected prevalence of diabetes, CHD & Stroke, cancers per 100,000 of the population by 2030 by country  
233x340mm (300 x 300 DPI)

1  
2  
3  
4  
5  
6  
7  
8  
9  
10  
11  
12  
13  
14  
15  
16  
17  
18  
19  
20  
21  
22  
23  
24  
25  
26  
27  
28  
29  
30  
31  
32  
33  
34  
35  
36  
37  
38  
39  
40  
41  
42  
43  
44  
45  
46  
47  
48  
49  
50  
51  
52  
53  
54  
55  
56  
57  
58  
59  
60

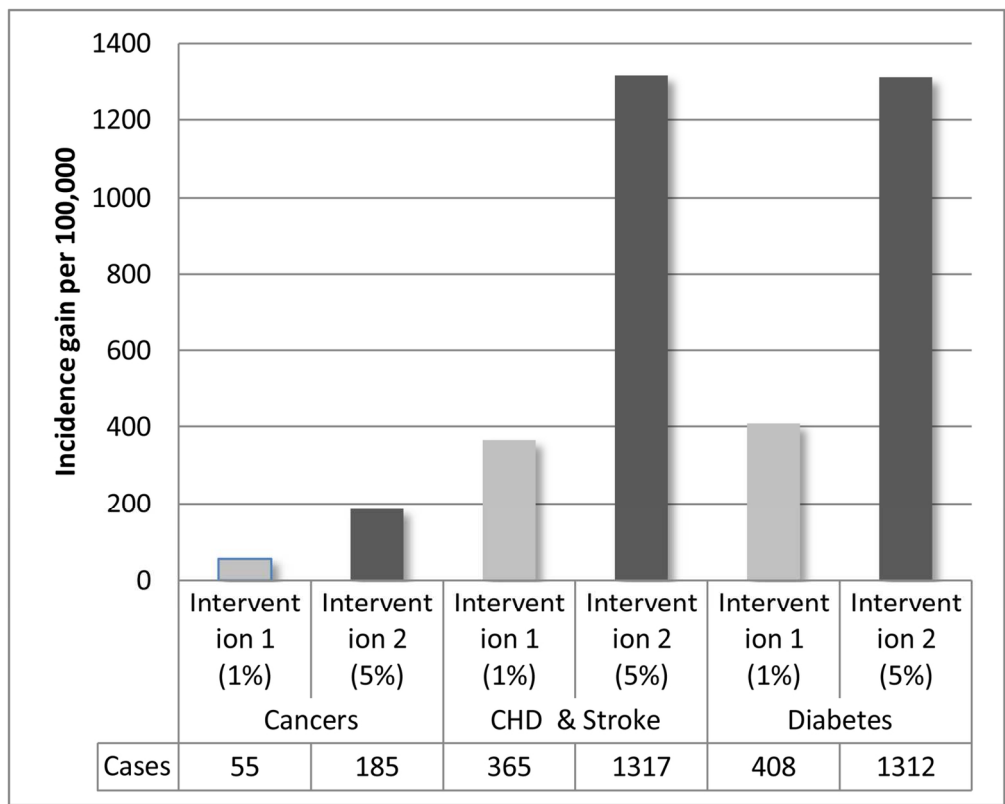

Cumulative incidence gains by 2030 by disease given a 1% or 5% reduction in population BMI relative to the baseline scenario.  
138x111mm (300 x 300 DPI)

For peer review only

1  
2  
3  
4  
5  
6  
7  
8  
9  
10  
11  
12  
13  
14  
15  
16  
17  
18  
19  
20  
21  
22  
23  
24  
25  
26  
27  
28  
29  
30  
31  
32  
33  
34  
35  
36  
37  
38  
39  
40  
41  
42  
43  
44  
45  
46  
47  
48  
49  
50  
51  
52  
53  
54  
55  
56  
57  
58  
59  
60

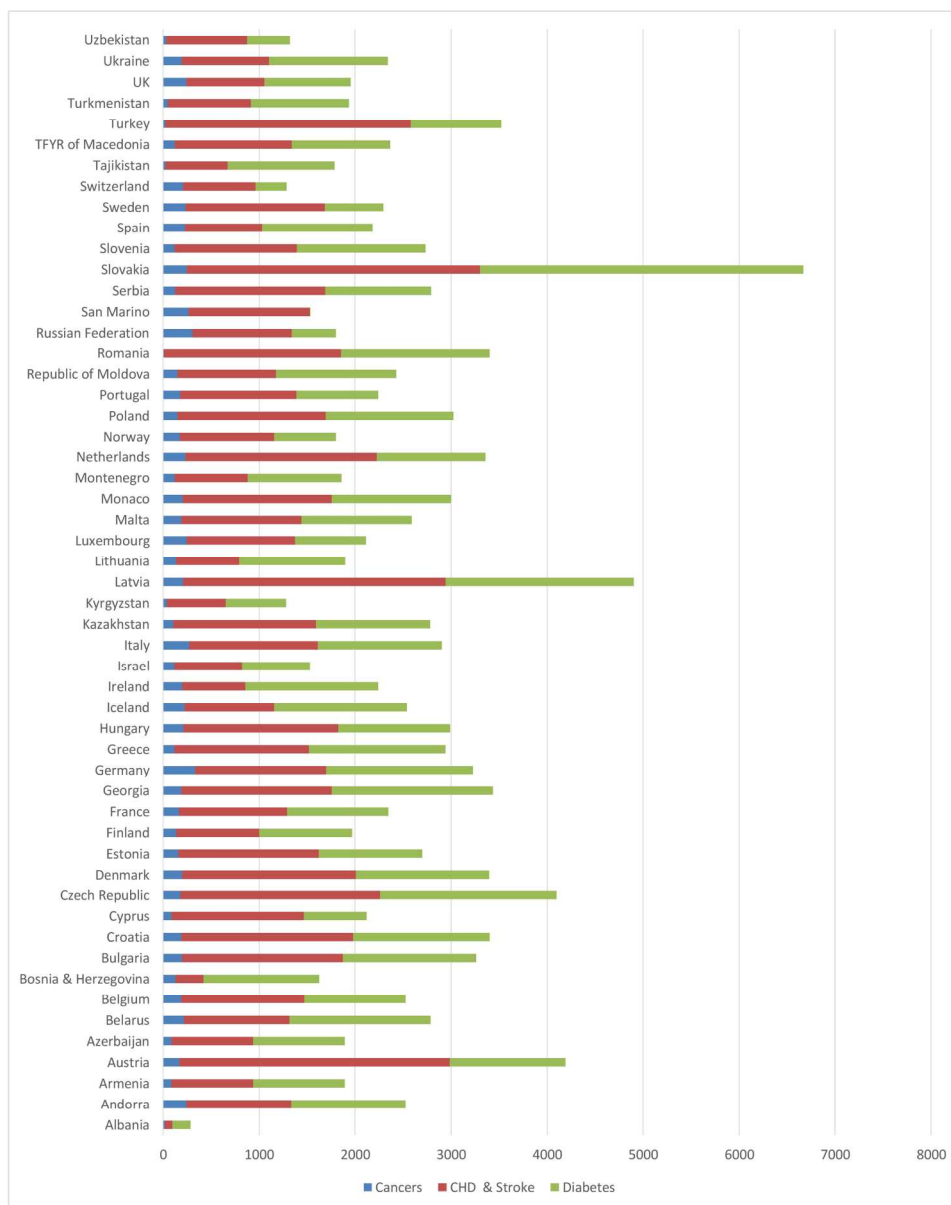

Projected cumulative incidence cases avoided by 2030 per 100,000 of the population by country given a 5% reduction in population BMI  
217x273mm (300 x 300 DPI)

1  
2  
3  
4  
5  
6  
7  
8  
9  
10  
11  
12  
13  
14  
15  
16  
17  
18  
19  
20  
21  
22  
23  
24  
25  
26  
27  
28  
29  
30  
31  
32  
33  
34  
35  
36  
37  
38  
39  
40  
41  
42  
43  
44  
45  
46  
47

Appendix 1 Table of BMI references for each country

| Country                | Study name citation                                                          | Data year(s) | Sample size |      | Age groups | Measured/<br>self-reported | National/<br>regional data |
|------------------------|------------------------------------------------------------------------------|--------------|-------------|------|------------|----------------------------|----------------------------|
|                        |                                                                              |              | M           | F    |            |                            |                            |
| Albania                | Shapo et al, 2003<br>Demographic and Health Survey                           | 2001         | 535         | 585  | 24-65+     | Measured                   | Regional                   |
|                        |                                                                              | 2009         | 2972        | 7330 | 15-49      | Measured                   | National                   |
| Andorra                | No BMI data, Spain proxy adjusted for Monaco population size and structure   |              |             |      |            |                            |                            |
| Armenia                | Demographic and Health Survey                                                | 2000         | -           | 5962 | 15-49      | Measured                   | National                   |
|                        | Personal communication B. Roberts                                            | 2001         | 745         | 1049 | 18-60+     | Self-reported              | National                   |
|                        | Demographic and Health Survey                                                | 2005         | -           | 6016 | 15-49      | Measured                   | National                   |
|                        | Personal communication B. Roberts                                            | 2010         | 789         | 932  | 18-60+     | Self-reported              | National                   |
| Austria                | Health Statistics Austria, 2002                                              | 1999         | 3368        | 3624 | 15-100     | Self-reported              | National                   |
|                        | Schwarz, Abdominal Obesity and Cardiometabolic Risk Factors in Austria, 2007 | 2006         | 528         | 526  | 30-74      | Self-reported              | National                   |
|                        | Klimont et al, Österreichische Gesundheitsbefragung, 2006/2007               | 2007         | 2914        | 3203 | 20-100     | Self-reported              | National                   |
| Azerbaijan             | WHO <sup>1</sup> : Reproductive Health Survey                                | 2001         | -           | 1772 | 20-44      | Measured                   | National                   |
|                        | Demographic and Health Survey                                                | 2006         | 2382        | 7793 | 15-49      | Measured                   | National                   |
|                        | Personal communication B. Roberts                                            | 2010         | 789         | 821  | 18-60+     | Self-reported              | National                   |
|                        | Azerbaijan Statistical yearbook 2012                                         | 2011         | 2056        | 2194 | 15-65+     | Unknown                    | National                   |
| Belarus                | Personal communication B. Roberts                                            | 2001         | 758         | 925  | 18-60+     | Self-reported              | National                   |
|                        | Personal communication B. Roberts                                            | 2010         | 764         | 991  | 18-60+     | Self-reported              | National                   |
| Belgium                | Belgian Health Interview Survey, 1997                                        | 1997         | 3934        | 4137 | 15-100     | Self-reported              | National                   |
|                        | Belgian Health Interview Survey, 2001                                        | 2001         | 4582        | 4809 | 15-100     | Self-reported              | National                   |
|                        | Belgian Health Interview Survey, 2004                                        | 2004         | 4836        | 5483 | 15-100     | Self-reported              | National                   |
|                        | Belgian Health Interview Survey, 2008                                        | 2008         | 4093        | 4738 | 15-100     | Self-reported              | National                   |
| Bosnia and Herzegovina | WHO: Laatikainen T et al, 2002                                               | 2002         | 1118        | 1613 | 25-64      | Measured                   | National                   |
|                        | Estimated from Global Burden of Disease mean data <sup>2</sup>               | 2008         |             |      |            |                            |                            |
| Bulgaria               | WHO; Survey of the Health Status of the Population                           | 2001         | 8008        |      | 25-74      | Self-reported              | National                   |
|                        | WHO; Petrova et al 2006                                                      | 2004         | 515         | 516  | 25-74      | Self-reported              | National                   |
|                        | Eurostat database: Health Interview Survey 2008 Bulgaria                     | 2008         | 5664        |      | 25-84      | Self-reported              | National                   |

| Country                                                                | Study name citation                                                                           | Data year(s) | Sample size |        | Age groups    | Measured/<br>self-reported | National/<br>regional data |
|------------------------------------------------------------------------|-----------------------------------------------------------------------------------------------|--------------|-------------|--------|---------------|----------------------------|----------------------------|
|                                                                        |                                                                                               |              | M           | F      |               |                            |                            |
| Croatia                                                                | WHO; Budak, 2003                                                                              | 97-99        | 1967        | 2982   | 0-100         | Measured                   | National                   |
|                                                                        | WHO; Croatian Adult Health Survey                                                             | 2003         | 2878        | 6162   | 18+           | Measured                   | National                   |
| Cyprus                                                                 | Statistical Service Cyprus, personal communication                                            | 2003         | 267866      | 284397 | 15-100        | Self-reported              | National                   |
|                                                                        | Statistical Service Cyprus, personal communication                                            | 2008         | 277077      | 300761 | 15-100        | Self-reported              | National                   |
| Czech Republic                                                         | WHO; Sample Survey of the Health Status of the Czech Population HIS CR 1993                   | 1993         | 734         | 833    | 20-74         | Self-reported              | National                   |
|                                                                        | WHO; Sample Survey of the Health Status of the Czech Population 1996                          | 1996         | 1031        | 1123   | 20-74         | Self-reported              | National                   |
|                                                                        | WHO; Sample Survey of the Health Status of the Czech Population HIS 1999                      | 1999         | 1603        | 1760   | 20-74         | Self-reported              | National                   |
|                                                                        | WHO; Sample Survey of the Health Status of the Czech Population HIS 2002                      | 2002         | 1142        | 1284   | 20-74         | Self-reported              | National                   |
|                                                                        | Eurostat database: European Health Interview Survey 2008 Czech Republic                       | 2008         | 940         | 1015   | 20-74         | Self-reported              | National                   |
| Denmark                                                                | SUSY 2000, National Institute of Public Health                                                | 2000         | 8126        | 8275   | 16-100        | Self-reported              | National                   |
|                                                                        | Ekholm et al, Health and mortality survey Denmark, 2005                                       | 2006         | 7046        | 7441   | 16-100        | Self-reported              | National                   |
|                                                                        | SUSY 2010, National Institute of Public Health                                                | 2010         | 79347       | 92873  | 16-100        | Self-reported              | National                   |
| Estonia                                                                | Unpublished data obtained from Mare Tekkel                                                    | 1998         | 561         | 743    | 16-64         | Self-reported              | National                   |
|                                                                        | Kasmel et al. Health behaviour among Estonian adult population, spring 2000                   | 2000         | 547         | 790    | 16-64         | Self-reported              | National                   |
|                                                                        | Kasmel et al. Health behaviour among Estonian adult population, spring 2002                   | 2002         | 542         | 779    | 16-64         | Self-reported              | National                   |
|                                                                        | Tervise Arengu Instituut, Health behaviour among Estonian adult population                    | 2004         | 1299        | 1743   | 16-64         | Self-reported              | National                   |
|                                                                        | Tekkel et al. Health Behavior among Estonian Adult Population, 2006                           | 2006         | 1112        | 1706   | 16-64         | Self-reported              | National                   |
|                                                                        | Tekkel et al. Health Behavior among Estonian Adult Population, 2008                           | 2008         | 1248        | 1702   | 16-64         | Self-reported              | National                   |
|                                                                        | Tekkel and Veideman, Health Behaviour among Estonian Adult Population 2010                    | 2010         | 1227        | 1760   | 16-64         | Self-reported              | National                   |
| Finland                                                                | WHO; Helakorpi et al, Health behaviour among Finnish adult population, 1998                   | 1998         | 1689        | 1816   | 15-64         | Self-reported              | National                   |
|                                                                        | WHO; Helakorpi et al, Health behaviour among Finnish adult population, 1999                   | 1999         | 1523        | 1801   | 15-64         | Self-reported              | National                   |
|                                                                        | WHO; Raitarki et al, Distribution and determinants of serum high-sensitive C-reactive protein | 2001         | 1026        | 1193   | 20-39         | Self-reported              | National                   |
|                                                                        | WHO; Helakorpi et al, Health behaviour among Finnish adult population, 2002                   | 2002         | 1462        | 1757   | 15-64         | Self-reported              | National                   |
|                                                                        | WHO ; Helakorpi et al, Health behaviour among Finnish adult population, 2003                  | 2003         | 1516        | 1819   | 15-64         | Self-reported              | National                   |
|                                                                        | WHO; Helakorpi et al, Health behaviour among Finnish adult population, 2004                   | 2004         | 1520        | 1805   | 15-64         | Self-reported              | National                   |
|                                                                        | WHO; Helakorpi et al, Health behaviour among Finnish adult population, 2005                   | 2005         | 1500        | 1727   | 15-64         | Self-reported              | National                   |
|                                                                        | WHO; Helakorpi et al, Health behaviour among Finnish adult population, 2006                   | 2006         | 1450        | 1761   | 15-64         | Self-reported              | National                   |
|                                                                        | WHO; Helakorpi et al, Health behaviour among Finnish adult population, 2007                   | 2007         | 1397        | 1789   | 15-64         | Self-reported              | National                   |
|                                                                        | WHO; Helakorpi et al, Health behaviour among Finnish adult population, 2008                   | 2008         | 1346        | 1776   | 15-64         | Self-reported              | National                   |
|                                                                        | Helakorpi et al, Health behaviour among Finnish adult population, 2009                        | 2009         | 1240        | 1620   | 15-64         | Self-reported              | National                   |
| Helakorpi et al, Health behaviour among Finnish adult population, 2010 | 2010                                                                                          | 1221         | 1539        | 15-64  | Self-reported | National                   |                            |
| Helakorpi et al, Health behaviour among Finnish adult population, 2011 | 2011                                                                                          | 1181         | 1565        | 15-64  | Self-reported | National                   |                            |



| Country | Study name citation                                                                          | Data year(s) | Sample size |         | Age groups | Measured/<br>self-reported | National/<br>regional data |
|---------|----------------------------------------------------------------------------------------------|--------------|-------------|---------|------------|----------------------------|----------------------------|
|         |                                                                                              |              | M           | F       |            |                            |                            |
| France  | Maillard et al, Trends in the prevalence of obesity in the French adult population, 1999     | 1992         | 7250        | 7856    | 18-100     | Self-reported              | National                   |
|         | Enquête épidémiologique nationale sur le surpoids et l'obésité, Roche 2009                   | 1997         | -           | -       | 18-100     | Self-reported              | National                   |
|         | Enquête épidémiologique nationale sur le surpoids et l'obésité, Roche 2009                   | 2000         | -           | -       | 18-100     | Self-reported              | National                   |
|         | Enquête épidémiologique nationale sur le surpoids et l'obésité, Roche 2009                   | 2003         | 25770       |         | 18-100     | Self-reported              | National                   |
|         | Enquête épidémiologique nationale sur le surpoids et l'obésité, Roche 2009                   | 2006         | -           | -       | 18-100     | Self-reported              | National                   |
|         | Eurostat database; Health Survey 2008 France                                                 | 2008         | 3115        |         | 18-100     | Self-reported              | National                   |
|         | Enquête épidémiologique nationale sur le surpoids et l'obésité, Roche 2009                   | 2009         | -           | -       | 18-100     | Self-reported              | National                   |
| Georgia | Personal communication B. Roberts                                                            | 2001         | 874         | 994     | 18-60+     | Self-reported              | National                   |
|         | Personal communication B. Roberts                                                            | 2010         | 728         | 1134    | 18-60+     | Self-reported              | National                   |
| Germany | WHO; Hoffmester et al, National trends in risk factors for CVD in Germany, 1994              | 1991         | 2556        | 2715    | 25-69      | Measured                   | National                   |
|         | Microcensus 1999, Federal Statistics Office, personal communication                          | 1999         | 24513       | 25765   | 18-100     | Self-reported              | National                   |
|         | Microcensus 2003, Federal Statistics Office, personal communication                          | 2003         | 24222       | 25235   | 18-100     | Self-reported              | National                   |
|         | Microcensus 2005, Federal Statistics Office, personal communication                          | 2005         | 25873       | 26654   | 18-100     | Self-reported              | National                   |
|         | Nationale Verzehrs Studie II 2008, personal communication                                    | 2008         | 6117        | 7090    | 18-80      | Self-reported              | National                   |
|         | Microcensus 2009, Federal Statistics Office, personal communication                          | 2009         | 25112       | 25560   | 18-100     | Self-reported              | National                   |
| Greece  | Survey on Income & Living Conditions, Hellenic Statistical Authority, personal communication | 1998         | 4659710     | 5133801 | 15-100     | Self-reported              | National                   |
|         | Survey on Income & Living Conditions, Hellenic Statistical Authority, personal communication | 1999         | 4428897     | 4912742 | 15-100     | Self-reported              | National                   |
|         | Survey on Income & Living Conditions, Hellenic Statistical Authority, personal communication | 2000         | 4398975     | 4831754 | 15-100     | Self-reported              | National                   |
|         | Survey on Income & Living Conditions, Hellenic Statistical Authority, personal communication | 2001         | 4360600     | 4867626 | 15-100     | Self-reported              | National                   |
|         | WHO; Kapantais et al, 2004                                                                   | 2003         | 8234        | 9107    | 20-69      | Self-reported              | National                   |
|         | Survey on Income & Living Conditions, Hellenic Statistical Authority, personal communication | 2009         | 4369422     | 4618038 | 15-100     | Self-reported              | National                   |
| Hungary | WHO: Boros et al. National Health Interview Survey 2003                                      | 2003         | 2214        | 2741    | 25-64      | Self-reported              | National                   |
|         | Eurostat database: Health Interview Survey 2008 Hungary                                      | 2009         | 5051        |         | 25-64      | Self-reported              | National                   |
| Iceland | Personal communication E. Gisladdottir                                                       | 1990         | 557         | 577     | 15-80      | Self-reported              | National                   |
|         | Personal communication E. Gisladdottir                                                       | 2002         | 591         | 656     | 18-79      | Self-reported              | National                   |
|         | Personal communication E. Gisladdottir                                                       | 2007         | 2670        | 2995    | 18-79      | Self-reported              | National                   |
|         | Personal communication E. Gisladdottir                                                       | 2010         | 621         | 640     | 18-79      | Self-reported              | National                   |

| Country    | Study name citation                                                                    | Data year(s) | Sample size |       | Age groups | Measured/<br>self-reported | National/<br>regional data |
|------------|----------------------------------------------------------------------------------------|--------------|-------------|-------|------------|----------------------------|----------------------------|
|            |                                                                                        |              | M           | F     |            |                            |                            |
| Ireland    | North/South Ireland Food Consumption Survey (NSIFCS)                                   | 1998         | 2688        | 3074  | 18-64      | Self-reported              | National                   |
|            | Survey of Lifestyle, Attitudes and Nutrition in Ireland (SLAN)                         | 2002         | 2164        | 3149  | 18-100     | Self-reported              | National                   |
|            | Survey of Lifestyle, Attitudes and Nutrition in Ireland (SLAN)                         | 2007         | 942         | 1224  | 18-100     | Measured                   | National                   |
|            | Growing Up in Ireland (GUI)                                                            | 2008         | 6761        | 7799  | 18-100     | Measured                   | National                   |
|            | Combined NANS and GUI data                                                             | 2009         | 8389        | 8415  | 18-100     | Measured                   | National                   |
|            | North/South Ireland Food Consumption Survey (NSIFCS)                                   | 2010         | 361         | 375   | 18-100     | Measured                   | National                   |
| Italy      | Calza et al, Obesity and prevalence of chronic diseases, personal communication        | 2000         | 55303       | 59716 | 18-100     | Self-reported              | National                   |
|            | WHO; Istituto Nazionale Di Statistica. Stili di vita e condizioni di salute, 2004      | 2002         | 21851       | 23738 | 18-100     | Self-reported              | National                   |
|            | WHO; Istituto Nazionale Di Statistica. Stili di vita e condizioni di salute, 2004      | 2003         | 21233       | 23151 | 18-100     | Self-reported              | National                   |
|            | WHO; Gallus et al, Overweight and obesity in Italian adults, 2004                      | 2004         | 1407        | 1525  | 18-100     | Self-reported              | National                   |
|            | WHO; Istituto Nazionale Di Statistica. Health conditions and risk factors, 2007        | 2005         | 19384       | 21165 | 18-100     | Self-reported              | National                   |
|            | Istituto Nazionale Di Statistica . La vita quotidiana nel 2006, personal communication | 2006         | 19378       | 21169 | 18-100     | Self-reported              | National                   |
|            | Istat database, personal communication                                                 | 2007         | 19187       | 20822 | 25-100     | Self-reported              | National                   |
|            | Istat database, personal communication                                                 | 2008         | 23522       | 25437 | 18-100     | Self-reported              | National                   |
|            | Istat database, personal communication                                                 | 2009         | 23689       | 25592 | 18-100     | Self-reported              | National                   |
|            | Istat database, personal communication                                                 | 2010         | 19151       | 21060 | 25-100     | Self-reported              | National                   |
| Israel     | Keinar-Boken et al, 2005                                                               | 2000         | 1371        | 1410  | 15-64      | Self-reported              | National                   |
|            | Personal communication with A. Ifrah                                                   | 2002         | 3029        | 3287  | 18-64      | Self-reported              | National                   |
|            | Personal communication with A. Ifrah                                                   | 2004         | 1455        | 1910  | 18-64      | Self-reported              | National                   |
|            | Personal communication with A. Ifrah                                                   | 2008         | 1987        | 2199  | 21-64      | Self-reported              | National                   |
|            | Personal communication with N. Goldberger                                              | 2009         | 4880        | 5451  | 21-64      | Self-reported              | National                   |
| Kazakhstan | WHO: Demographic and Health Survey                                                     | 1999         | -           | 2238  | 15-49      | Measured                   | National                   |
|            | Personal communication B. Roberts                                                      | 2001         | 802         | 986   | 18-60+     | Self-reported              | National                   |
|            | Personal communication B. Roberts                                                      | 2010         | 851         | 939   | 18-60+     | Self-reported              | National                   |
|            | Personal communication S. Tazhybayev                                                   | 2012         | 1299        | 2430  | 15-65+     | Measured                   | National                   |
| Kyrgyzstan | WHO: Popkin BM and Martinchik AN, 1994                                                 | 1993         | 2267        | 2647  | 18-100     | Measured                   | National                   |
|            | WHO: Demographic and Health Survey                                                     | 1997         | -           | 3518  | 15-49      | Measured                   | National                   |
|            | Personal communication B. Roberts                                                      | 2001         | 845         | 988   | 18-60+     | Self-reported              | National                   |
|            | Personal communication B. Roberts                                                      | 2010         | 870         | 930   | 18-60+     | Self-reported              | National                   |

| Country    | Study name citation                                                         | Data year(s) | Sample size |        | Age groups | Measured/<br>self-reported | National/<br>regional data |
|------------|-----------------------------------------------------------------------------|--------------|-------------|--------|------------|----------------------------|----------------------------|
|            |                                                                             |              | M           | F      |            |                            |                            |
| Latvia     | Pudule et al. Health behaviour among Latvian adult population, 2002         | 2002         | 856         | 1091   | 15-64      | Self-reported              | National                   |
|            | Unpublished data obtained from Dace Krievkalne                              | 2003         | 3189        | 3647   | 20-74      | Self-reported              | National                   |
|            | Pudule et al. Health behaviour among Latvian adult population, 2004         | 2004         | 742         | 1014   | 15-74      | Self-reported              | National                   |
|            | Pudule et al. Health behaviour among Latvian adult population, 2006         | 2006         | 665         | 873    | 15-74      | Self-reported              | National                   |
|            | Eurostat database: European Health Interview Survey 2008 Latvia             | 2008         | 2867        | 3591   | 18-94      | Self-reported              | National                   |
| Lithuania  | WHO; Grabauskas et al, 1998                                                 | 1998         | 811         | 1044   | 20-64      | Self-reported              | National                   |
|            | WHO; Grabauskas et al, 2000                                                 | 2000         | 989         | 1183   | 20-64      | Self-reported              | National                   |
|            | Grabauskas et al. Lithuanian health behaviour monitoring, 2002              | 2002         | 1650        | 1027   | 20-64      | Self-reported              | National                   |
|            | Grabauskas et al. Health Behaviour among Lithuanian adult population, 2004  | 2004         | 757         | 1009   | 20-64      | Self-reported              | National                   |
|            | Unpublished data obtained from Sigita Mačiukienė                            | 2005         | 3801        | 5707   | 15-100     | Self-reported              | National                   |
|            | Grabauskas et al. Health Behaviour among Lithuanian Adult Population, 2006  | 2006         | 704         | 1001   | 20-64      | Self-reported              | National                   |
|            | Grabauskas et al, Health Behaviur among Lithuanian Adult Population, 2008   | 2008         | 715         | 994    | 20-64      | Self-reported              | National                   |
|            | Grabauskas et al, Health Behaviur among Lithuanian Adult Population, 2010   | 2010         | 578         | 1359   | 20-64      | Self-reported              | National                   |
| Luxembourg | Tchicaya and Lorentz, Vivre au Luxembourg, 2010                             | 1995         | -           | -      | 16-64      | Self-reported              | National                   |
|            | Tchicaya and Lorentz, Vivre au Luxembourg, 2010                             | 2005         | -           | -      | 16-64      | Self-reported              | National                   |
|            | Tchicaya and Lorentz, Vivre au Luxembourg, 2010                             | 2008         | -           | -      | 16-64      | Self-reported              | National                   |
| Malta      | WHO; Asciak et al, The first national health interview survey, 2003         | 2002         | 1844        | 2022   | 16-100     | Self-reported              | National                   |
|            | National Health Survey 2007, personal communication                         | 2007         | 151898      | 161082 | 18-65      | Self-reported              | National                   |
|            | Eurostat database: European Health Interview Survey 2008 Malta              | 2008         | -           | -      | 18-100     | Self-reported              | National                   |
| Monaco     | No BMI data, France proxy adjusted for Monaco population size and structure |              |             |        |            |                            |                            |
| Montenegro | WHO: Health status and health needs in Serbia., 2002                        | 2000         | 4458        | 4975   | 20-100     | Measured                   | National                   |
|            | Estimated from Global Burden of Disease mean data <sup>2</sup>              | 2008         |             |        |            |                            |                            |

| Country                                       | Study name citation                                                            | Data year(s) | Sample size |        | Age groups    | Measured/<br>self-reported | National/<br>regional data |
|-----------------------------------------------|--------------------------------------------------------------------------------|--------------|-------------|--------|---------------|----------------------------|----------------------------|
|                                               |                                                                                |              | M           | F      |               |                            |                            |
| Netherlands                                   | Netherlands Central Bureau voor de Statistiek                                  | 2000         | -           | -      | 16-100        | Self-reported              | National                   |
|                                               | Netherlands Central Bureau voor de Statistiek                                  | 2001         | -           | -      | 16-100        | Self-reported              | National                   |
|                                               | Netherlands Central Bureau voor de Statistiek                                  | 2002         | -           | -      | 16-100        | Self-reported              | National                   |
|                                               | Netherlands Central Bureau voor de Statistiek                                  | 2003         | -           | -      | 16-100        | Self-reported              | National                   |
|                                               | Netherlands Central Bureau voor de Statistiek                                  | 2004         | -           | -      | 16-100        | Self-reported              | National                   |
|                                               | Netherlands Central Bureau voor de Statistiek                                  | 2005         | -           | -      | 16-100        | Self-reported              | National                   |
|                                               | Netherlands Central Bureau voor de Statistiek                                  | 2006         | -           | -      | 16-100        | Self-reported              | National                   |
|                                               | Netherlands Central Bureau voor de Statistiek                                  | 2007         | -           | -      | 16-100        | Self-reported              | National                   |
|                                               | Netherlands Central Bureau voor de Statistiek                                  | 2008         | -           | -      | 16-100        | Self-reported              | National                   |
|                                               | Netherlands Central Bureau voor de Statistiek                                  | 2009         | -           | -      | 16-100        | Self-reported              | National                   |
|                                               | Netherlands Central Bureau voor de Statistiek                                  | 2010         | -           | -      | 16-100        | Self-reported              | National                   |
| Netherlands Central Bureau voor de Statistiek | 2011                                                                           | -            | -           | 16-100 | Self-reported | National                   |                            |
| Norway                                        | WHO: Johansson et al, 1998                                                     | 1994         | 1461        | 1559   | 16-100        | Self-reported              | National                   |
|                                               | Health Interview Survey                                                        | 1998         | 3456        | 3669   | 16-100        | Self-reported              | National                   |
|                                               | Health Interview Survey                                                        | 2002         | 3410        | 3417   | 16-100        | Self-reported              | National                   |
|                                               | WHO: Hougen HC, 2006                                                           | 2005         | 3401        | 3365   | 16-100        | Self-reported              | National                   |
|                                               | WHO: Wilhelmsen , 2009                                                         | 2008         | 3172        | 3293   | 16-100        | Self-reported              | National                   |
| Poland                                        | WHO; CINDI 2003                                                                | 1992         | 792         | 904    | 25-64         | Measured                   | Subnational                |
|                                               | Eurostat database: National Health Interview Survey for Poland                 | 1996         | 3137        | 9411   | 15-100        | Self-reported              | National                   |
|                                               | Szponar et al. Household food consumption and anthropometric survey, 2003      | 2001         | 1949        |        | 19-100        | Both                       | National                   |
|                                               | Statistical Office Poland, personal communication                              | 2004         | 19335       | 19446  | 15-70         | Self-reported              | National                   |
|                                               | Statistical Office Poland, personal communication                              | 2009         | 11932       | 14673  | 15-70         | Self-reported              | National                   |
| Portugal                                      | Marques-Vidal et al, Ten-year trends in overweight and obesity 1995-2005; 2011 | 1996         | 38504       |        | 18-75         | Self-reported              | National                   |
|                                               | Marques-Vidal et al, Ten-year trends in overweight and obesity 1995-2005; 2011 | 1999         | 38688       |        | 18-75         | Self-reported              | National                   |
|                                               | WHO; Carmo et al, Overweigh and obesity in Portugal, 2008                      | 2004         | 8116        |        | 18-64         | Both                       | National                   |
|                                               | Marques-Vidal et al, Ten-year trends in overweight and obesity 1995-2005; 2011 | 2006         | 25348       |        | 18-75         | Self-reported              | National                   |
| Republic of Moldova                           | Personal communication B. Roberts                                              | 2001         | 816         | 973    | 18-60+        | Self-reported              | National                   |
|                                               | Demographic and Health Survey                                                  | 2005         | -           | 7062   | 15-49         | Measured                   | National                   |
|                                               | Personal communication B. Roberts                                              | 2010         | 744         | 967    | 18-60+        | Self-reported              | National                   |
| Romania                                       | Eurostat database: National Health Interview Survey 2002 Romania               | 2000         |             | 21200  | 15-100        | Self-reported              | National                   |
|                                               | Eurostat database: European Health Interview Survey 2008 Romania               | 2008         |             | 18172  | 18-100        | Self-reported              | National                   |

1  
2  
3  
4  
5  
6  
7  
8  
9  
10  
11  
12  
13  
14  
15  
16  
17  
18  
19  
20  
21  
22  
23  
24  
25  
26  
27  
28  
29  
30  
31  
32  
33  
34  
35  
36  
37  
38  
39  
40  
41  
42  
43  
44  
45  
46  
47

| Country                                                                   | Study name citation                                                           | Data year(s) | Sample size |        | Age groups    | Measured/<br>self-reported | National/<br>regional data |
|---------------------------------------------------------------------------|-------------------------------------------------------------------------------|--------------|-------------|--------|---------------|----------------------------|----------------------------|
|                                                                           |                                                                               |              | M           | F      |               |                            |                            |
| Russian Federation                                                        | Russia Longitudinal Monitoring Survey, University of North Carolina, 2011     | 1995         | 3364        | 4445   | 20-80+        | Self-reported              | National                   |
|                                                                           | Russia Longitudinal Monitoring Survey, University of North Carolina, 2011     | 1996         | 3288        | 4382   | 20-80+        | Self-reported              | National                   |
|                                                                           | Russia Longitudinal Monitoring Survey, University of North Carolina, 2011     | 1999         | 3399        | 4494   | 20-80+        | Self-reported              | National                   |
|                                                                           | Russia Longitudinal Monitoring Survey, University of North Carolina, 2011     | 2000         | 3497        | 4719   | 20-80+        | Self-reported              | National                   |
|                                                                           | Russia Longitudinal Monitoring Survey, University of North Carolina, 2011     | 2001         | 3859        | 5328   | 20-80+        | Self-reported              | National                   |
|                                                                           | Russia Longitudinal Monitoring Survey, University of North Carolina, 2011     | 2002         | 4034        | 5484   | 20-80+        | Self-reported              | National                   |
|                                                                           | Russia Longitudinal Monitoring Survey, University of North Carolina, 2011     | 2003         | 4089        | 5570   | 20-80+        | Self-reported              | National                   |
|                                                                           | Russia Longitudinal Monitoring Survey, University of North Carolina, 2011     | 2004         | 4113        | 5593   | 20-80+        | Self-reported              | National                   |
|                                                                           | Russia Longitudinal Monitoring Survey, University of North Carolina, 2011     | 2005         | 3997        | 5436   | 20-80+        | Self-reported              | National                   |
|                                                                           | Russia Longitudinal Monitoring Survey, University of North Carolina, 2011     | 2006         | 4969        | 6609   | 20-80+        | Self-reported              | National                   |
|                                                                           | Russia Longitudinal Monitoring Survey, University of North Carolina, 2011     | 2007         | 4950        | 6587   | 20-80+        | Self-reported              | National                   |
| Russia Longitudinal Monitoring Survey, University of North Carolina, 2011 | 2008                                                                          | 4693         | 6402        | 20-80+ | Self-reported | National                   |                            |
| Russia Longitudinal Monitoring Survey, University of North Carolina, 2011 | 2009                                                                          | 4708         | 6427        | 20-80+ | Self-reported | National                   |                            |
| San Marino                                                                | No BMI data, Italy proxy adjusted for Monaco population size and structure    |              |             |        |               |                            |                            |
| Serbia                                                                    | Grujic et al, 2002                                                            | 2000         | 4458        | 4974   | 20-100        | Measured                   | National                   |
|                                                                           | Unpublished data obtained from Tatjana Pavlica                                | 2001-07      | 1865        | 2382   | 20-100        | Measured                   | Regional                   |
| Slovakia                                                                  | Eurostat database: National Health Interview Survey 2002 Slovakia             | 2002         | 1569        |        | 15-64         | Self-reported              | National                   |
|                                                                           | Annual Health Report, Slovak Public Health Authority, personal communication  | 2006         | 1393        | 1443   | 15-65         | Self-reported              | National                   |
|                                                                           | Eurostat database: European Health Interview Survey 2008 Slovakia             | 2009         | 1457        | 1423   | 15-65         | Self-reported              | National                   |
|                                                                           | Annual Health Report , Slovak Public Health Authority, personal communication | 2010         | 1437        | 1438   | 15-65         | Self-reported              | National                   |
| Slovenia                                                                  | Eurostat database: National Health Interview Survey 2002 Slovenia             | 2001         | 1097        |        | 15-100        | Self-reported              | National                   |
|                                                                           | Eurostat database: European Health Interview Survey 2008 Slovenia             | 2007         | 2118        |        | 18-100        | Self-reported              | National                   |
| Spain                                                                     | National Statistics Institute online database, National Health Survey 2003    | 2003         | 16296       | 17248  | 18-100        | Self-reported              | National                   |
|                                                                           | National Statistics Institute online database, National Health Survey 2006    | 2006         | 16911       | 16478  | 18-100        | Self-reported              | National                   |
|                                                                           | National Statistics Institute online database, National Health Survey 2009    | 2009         | 17558       | 17718  | 18-100        | Self-reported              | National                   |

| Country        | Study name citation                                                                 | Data year(s) | Sample size |       | Age groups | Measured/<br>self-reported | National/<br>regional data |
|----------------|-------------------------------------------------------------------------------------|--------------|-------------|-------|------------|----------------------------|----------------------------|
|                |                                                                                     |              | M           | F     |            |                            |                            |
| Sweden         | WHO; Swedish Survey of Living Conditions                                            | 1999         | 5587        | 5762  | 16-84      | Self-reported              | National                   |
|                | WHO; Swedish Survey of Living Conditions                                            | 2001         | 5515        | 5838  | 16-84      | Self-reported              | National                   |
|                | Statistics Sweden, personal communication                                           | 2004         | 2742        | 2849  | 16-84      | Self-reported              | National                   |
|                | Statistics Sweden, personal communication                                           | 2008         | 11118       |       | 16-84      | Self-reported              | National                   |
|                | WHO; Enkätundersökning 2009, Det nationella urvalet                                 | 2009         | 4570        | 5604  | 16-84      | Self-reported              | National                   |
|                | Statistics Sweden, personal communication                                           | 2011         | 2633        | 2914  | 16-100     | Self-reported              | National                   |
| Switzerland    | WHO: Enquete Suisse sur la Sante 2003                                               | 1992         | 6749        | 8150  | 15-100     | Self-reported              | National                   |
|                | WHO: Enquete Suisse sur la Sante 2003                                               | 1997         | 6716        | 7105  | 15-100     | Self-reported              | National                   |
|                | WHO: Enquete Suisse sur la Sante 2003                                               | 2002         | 8843        | 10629 | 15-100     | Self-reported              | National                   |
|                | WHO: Enquete Suisse sur la Sante 2009                                               | 2007         | 8339        | 10134 | 15-100     | Self-reported              | National                   |
| Tajikistan     | Estimated from Global Burden of Disease mean data <sup>2</sup><br>1995 through 2008 | 1995-2008    |             |       |            |                            |                            |
| TFYR Macedonia | Estimated from Global Burden of Disease mean data <sup>2</sup><br>1995 through 2008 | 1995-2008    |             |       |            |                            |                            |
| Turkey         | Erem et al, 2001                                                                    | 1998/99      | 1324        | 1322  | 20-100     | Measured                   | Subnational                |
|                | Turkish Obesity and Hypertension Study, Hatemi et al, 2003                          | 1999-2000    | 15144       | 4975  | 20-100     | Measured                   | Subnational                |
|                | Yumuk et al, 2005                                                                   | 2001         | 5866        | 7000  | 20-100     | Measured                   | Subnational                |
|                | Erem et al, 2004                                                                    | 2001-2002    | 2288        | 2728  | 20-69      | Measured                   | Subnational                |
|                | Oguz et al, 2008                                                                    | 2004-2005    | 2110        | 2154  | 20-100     | Measured                   | National                   |
|                | Iseri et al, 2008                                                                   | 2007         | 2263        | 1942  | 20-85      | Measured                   | National                   |
| Turkmenistan   | Estimated from Global Burden of Disease mean data <sup>3</sup><br>1995 through 2008 | 1995-2008    |             |       |            |                            |                            |
| Ukraine        | WHO: CINDI programme, 2003                                                          | 1995         | 788         | 892   | 25-64      | Measured                   | Subnational                |
|                | Personal communication B. Roberts                                                   | 2001         | 830         | 1229  | 18-60+     | Self-reported              | National                   |
|                | WHO: Kravchenko et al, 2005                                                         | 2002         | -           | 856   | 15-49      | Measured                   | National                   |
|                | Personal communication B. Roberts                                                   | 2010         | 794         | 1098  | 18-60+     | Self-reported              | National                   |

1  
2  
3  
4  
5  
6  
7  
8  
9  
10  
11  
12  
13  
14  
15  
16  
17  
18  
19  
20  
21  
22  
23  
24  
25  
26  
27  
28  
29  
30  
31  
32  
33  
34  
35  
36  
37  
38  
39  
40  
41  
42  
43  
44  
45  
46  
47

| Country    | Study name citation                                            | Data year(s) | Sample size |      | Age groups | Measured/<br>self-reported | National/<br>regional data |
|------------|----------------------------------------------------------------|--------------|-------------|------|------------|----------------------------|----------------------------|
|            |                                                                |              | M           | F    |            |                            |                            |
| UK         | Health Survey for England                                      | 2000         | 3260        | 3703 | 16-100     | Measured                   | National                   |
|            | Health Survey for England                                      | 2001         | 6267        | 7414 | 16-100     | Measured                   | National                   |
|            | Health Survey for England                                      | 2002         | 2969        | 3509 | 16-100     | Measured                   | National                   |
|            | Health Survey for England                                      | 2003         | 6519        | 6570 | 16-100     | Measured                   | National                   |
|            | Health Survey for England                                      | 2004         | 2772        | 2812 | 16-100     | Measured                   | National                   |
|            | Health Survey for England                                      | 2005         | 3144        | 3184 | 16-100     | Measured                   | National                   |
|            | Health Survey for England                                      | 2006         | 6014        | 6074 | 16-100     | Measured                   | National                   |
|            | Health Survey for England                                      | 2007         | 3008        | 2983 | 16-100     | Measured                   | National                   |
|            | Health Survey for England                                      | 2008         | 6385        | 6450 | 16-100     | Measured                   | National                   |
|            | Health Survey for England                                      | 2009         | 2055        | 2045 | 16-100     | Measured                   | National                   |
|            | Health Survey for England                                      | 2010         | 3563        | 3523 | 16-100     | Measured                   | National                   |
|            | Health Survey for England                                      | 2011         | 4852        | 5765 | 16-100     | Measured                   | National                   |
| Uzbekistan | WHO: Demographic and Health Survey                             | 1996         | -           | 4038 | 15-49      | Measured                   | National                   |
|            | Demographic and Health Survey                                  | 2002         | 2058        | 4967 | 15-65      | Measured                   | National                   |
|            | Estimated from Global Burden of Disease mean data <sup>2</sup> | 2008         |             |      |            |                            |                            |

<sup>1</sup> Denotes that data were taken from the WHO BMI database.

<sup>2</sup> [http://www1.imperial.ac.uk/publichealth/departments/ebs/projects/eresh/majidezzati/healthmetrics/metabolicriskfactors/metabolic\\_risk\\_factor\\_maps/](http://www1.imperial.ac.uk/publichealth/departments/ebs/projects/eresh/majidezzati/healthmetrics/metabolicriskfactors/metabolic_risk_factor_maps/)

## Appendix 2. Methodology of BMI data manipulation

### a) Projecting BMI forward using existing BMI prevalence data

An individual's body mass index (BMI) is defined as:

$$BMI = \frac{w}{h^2},$$

where  $w$  and  $h$  correspond to individual's weight and height, respectively.  $BMI$  provides a simple measure of a person's "fatness" or "thinness". Although  $BMI$  is measured on a continuous scale, it is grouped in the following five categories:

- 1)  $BMI$ : <18.5 (underweight)
- 2)  $BMI$  from 18.5 to 24.99: (healthy weight)
- 3)  $BMI$  from 25 to 29.99: (overweight)
- 4)  $BMI$  from 30 to 39.99: (obese)

Let  $g=1,\dots,4$ , denote  $BMI$  group (lower and larger values of  $g$  correspond to groups with lower and larger values of  $BMI$  on the continuous scale, respectively). Let  $q_g(t)$  be the prevalence of individuals with  $BMI$  values that correspond to group  $g$  at time  $t$ . To ensure that  $q_g(t)$  takes values within  $[0,1]$ , we model  $q_g(t)$  by

$$q_g(t) = \frac{1}{2} [1 + \tanh(\beta_0^g + \beta_1^g t)]. \quad (1)$$

An alternative way to estimate  $q_g(t)$  is through a logistic regression model with percentage for  $BMI$  group  $g$  as the outcome, and time,  $t$ , as the single explanatory variable:

$$\ln\left(\frac{q_g(t)}{1-q_g(t)}\right) = \beta_0^g + \beta_1^g t. \quad (2)$$

By solving equation (2) for  $q_g(t)$  we obtain

$$q_g(t) = \frac{\exp(\beta_0^g + \beta_1^g t)}{1 + \exp(\beta_0^g + \beta_1^g t)}.$$

Equations (1) and (2) are mathematically identical, but (1) provides greater numerical stability. Fitting separate models for the estimation of  $q_g(t)$  for each group  $g$ , does not guarantee that

$$\sum_{g=1}^5 q_g(t) = 1.$$

Thus, to ensure that the estimates of prevalence of individuals in all  $BMI$  groups sum up to 1 for each time  $t$ , we estimate the prevalence of individuals with  $BMI$  values that correspond to group  $g$  at time  $t$  by



$$P_g(t) = \frac{q_g(t)}{\sum_{g=1}^5 q_g(t)}. \quad (3)$$

These assumptions are explained further in Foresight: Tackling Obesities, Future Choices (1).

### b) Computing BMI from a single data point

Bosnia and Herzegovina, Montenegro and Uzbekistan had only one BMI data point. For these countries 2008 estimates were used based on an analysis by Finucane and colleagues (2). This extrapolates from their estimated mean. The BMI-distribution is assumed to have the form  $[p, (1-p)/2, (1-p)/2]$  where  $p$  is the prevalence of normal weight,  $p$  is then determined from the known mean.

### c) Computing BMI distribution from mean data

Where no BMI prevalence data existed for a country data trend data were extrapolated using mean data from the Global Burden of disease study (3) with the following assumptions:

#### Assumptions

##### Assumption 1

For each data-year,  $y$ ,  $\log(\text{BMI})$  has a Normal distribution  $N(\mu(y), \sigma(y))$ .

##### Assumption 2

The value for  $\mu(y)$  is taken as  $\ln(\text{mean-BMI}_{\text{GBD}}(y))$

##### Assumption 3

The value for  $\sigma(y)$  is obtained from the review data for that year and age-gender group by fitting a normal distribution to the  $\log(\text{bmi})$  data and taking the ML estimate. This is a programmed function in the obesity\_distribution program

For each year these assumptions allow the computation of

$$p_{\text{ok}} \equiv P(\text{BMI} < 25) = \frac{1}{\sqrt{2\pi}\sigma(y)} \int_{-\infty}^{\ln(25)} dt \exp\left(-\frac{(t - \mu(y))^2}{2\sigma^2(y)}\right)$$

$$p_{\text{ow}} \equiv P(25 < \text{BMI} < 30) = \frac{1}{\sqrt{2\pi}\sigma(y)} \int_{\ln(25)}^{\ln(30)} dt \exp\left(-\frac{(t - \mu(y))^2}{2\sigma^2(y)}\right)$$

$$p_{\text{ob}} \equiv P(30 < \text{BMI}) = \frac{1}{\sqrt{2\pi}\sigma(y)} \int_{\ln(30)}^{\infty} dt \exp\left(-\frac{(t - \mu(y))^2}{2\sigma^2(y)}\right)$$

##### Assumption 4

The 95% confidence intervals for the 3  $p$  values above are derived from GBD 95 % confidence intervals for the mean, thus for  $p(\text{BMI} < 25)$

$$\frac{1}{\sqrt{2\pi}\sigma(y)} \int_{-\infty}^{\ln(25)} dt \exp\left(-\frac{(t - \mu(y) + \text{cl}(y))^2}{2\sigma^2(y)}\right) < P(\text{BMI} < 25) < \frac{1}{\sqrt{2\pi}\sigma(y)} \int_{-\infty}^{\ln(25)} dt \exp\left(-\frac{(t - \mu(y) - \text{cl}(y))^2}{2\sigma^2(y)}\right)$$

The difference between the upper and lower limits is taken as  $4\sigma_{ok}$ .

Similar relations for pre-obesity and obese give a data point for each year  $y$ :

$$\{(p_{ok}, \sigma_{ok}), (p_{ow}, \sigma_{ow}), (p_{ob}, \sigma_{ob})\}$$

### Predicting BMI

The data set for the most recent 10 years of GBD data and associated Health Survey for England (HSE) data  $\sigma$ -values are used as described to compile a Text Data Entry file for the obesity\_distribution program.

### Sample sizes, probabilities and variances

Imagine a population having some uniformly distributed characteristic  $q$ . The population is sampled  $N$  times resulting in  $n$  occurrences of the discrete characteristic  $q$ . The posterior distribution of  $q$  is the beta distribution

$$p(q|N, n) = \frac{(N+1)!}{(N-n)!n!} q^n (1-q)^{N-n}$$

Equation 1

In line with the common practice, we have approximated beta distribution by a normal distribution (4). When it is valid to do so the best approximation is provided by a normal distribution whose mean is the maximum likelihood estimate for  $q$  - the value for which the beta distribution has a

maximum and is easily calculated as  $\hat{q} = \frac{n}{N}$ . The posterior distribution is approximated as a normal

distribution with this value as its mean, it has the variance  $\hat{\sigma}^2 = \frac{1}{N} \hat{q}(1-\hat{q})$ . [This approximation is

obtained by writing  $q^n(1-q)^{N-n} = \exp(n \ln q + (N-n) \ln(1-q))$  and expanding the argument of the exponential as a Taylor series about  $\hat{q}$  as far as terms quadratic in  $(q-\hat{q})$ .]

This is OK provided that  $\hat{q}$  is neither very close to zero or very close to 1, in which case this approximation of  $q$ 's beta distribution as a normal distribution with mean  $\hat{q}$  is not valid. In these circumstances it is better to approximate the posterior distribution as a normal distribution having mean and variance as given by the actual mean and variance of the beta distribution, namely

$$\hat{q} = \frac{(n+1)}{(N+2)}$$

$$\hat{\sigma}^2 = \frac{(n+1)(N-n+1)}{(N+1)(N+2)(N+3)}$$

Equation 2

Note that, when  $N \gg n$ , these approximations agree; Equation 2 has the advantage that  $n$  can take the value 0.

Means and distributions

Suppose BMI is distributed in the range 15-45 and that it has a mean  $m$ . If it is assumed that the distribution,  $\rho(\text{bmi})$ , is uniform for  $15 < \text{bmi} < B$  and for  $B < \text{bmi} < 45$  then we have

$$\rho = \begin{cases} \alpha & \text{for } 15 < b < B \\ \beta & \text{for } B < b < 45 \end{cases}$$

The condition that the distribution must integrate to unity is,

$$\int_{15}^{45} \rho db = \alpha(B - 15) + \beta(45 - B) = 1$$

The condition that it has the required mean is,

$$\int_{15}^{45} \rho b db = \frac{1}{2}\alpha(B - 15)(B + 15) + \frac{1}{2}\beta(45 - B)(45 + B) = m$$

These equations can be solved for  $\alpha$  and  $\beta$ ,

$$\alpha = \frac{45 + B - 2m}{30(B - 15)}, \quad \beta = \frac{2m - B - 15}{30(45 - B)}$$

The probability that a person has a bmi:  $p(\text{bmi} < B) = (45 + B - 2m)/30$ ;  $p(\text{bmi} > B) = (2m - B - 15)/30$

When  $B=25$  these values are  $(35-m)/15$  and  $(m-20)/15$  respectively

OTF-type distributions

Suppose the distribution is

$$p(\text{bmi}) = \begin{cases} p_1, & b_0 < \text{bmi} < b_1 \\ p_2, & b_1 < \text{bmi} < b_2 \\ p_3, & b_2 < \text{bmi} < b_3 \end{cases}$$

Equation 3

Typically  $b_0=15$ ,  $b_1=25$ ,  $b_2=30$ ,  $b_3=45$ .

Because it is a distribution, the sum of the probabilities  $\{p_i\}$  must add to 1:

$$p_1 + p_2 + p_3 = 1$$

Equation 4

The mean,  $m$ , is calculated as:

$$p_1(b_0 + b_1) + p_2(b_1 + b_2) + p_3(b_2 + b_3) = 2m$$

Equation 5

If we know the mean and we want to determine the 3 probabilities we need one other equation.

Suppose we know one of the  $p$ 's –  $p_3$  say. The other  $p$ -values are calculated as

$$p_1 = \frac{(b_1 \pm b_2) \pm p_3(b_3 - b_1) - 2m}{(b_2 - b_0)}, \quad p_2 = 1 - p_3 - p_1$$

If, instead, we knew  $p_1$  then the other values are given as

$$p_2 = \frac{(b_2 \pm b_3) \pm p_1(b_1 - b_2) - 2m}{(b_3 - b_1)}, \quad p_3 = 1 - p_1 - p_2$$

And, finally, if we know  $p_2$ :

$$p_3 = \frac{(b_3 \pm b_1) \pm p_2(b_2 - b_3) - 2m}{(b_1 - b_2)}, \quad p_1 = 1 - p_2 - p_3$$

[These are obtained by cyclically permuting the indices 1,2,3]

### Comparison of means

Suppose we have two means  $m_1, m_2$  with variances  $\sigma_1^2, \sigma_2^2$  which are supposed to be normally distributed. The test for them being 'the same' is that the ratio,  $\frac{m_1 - m_2}{\sqrt{\sigma_1^2 + \sigma_2^2}}$ , should be suitably small –

typically it should lie between  $\pm 1.96$  (1.96 is approximately 2; it occurs here because 95% of a zero mean, unit variance, normal distribution  $N(x;0,1)$  lies in the region  $|x| < 1.96$  .... and the normalised difference of the two means has a zero mean, unit variance, normal distribution).

The mean of a BMI distribution of the form of Equation 3 is given by Equation 5.

For the Imperial College website,

<http://www1.imperial.ac.uk/publichealth/departments/ebs/projects/eresh/majidezzati/healthmetrics/metabolicriskfactors/> the link [Download the numeral results \(by age group\)](#) produces an excel spread sheet for mean BMI values by year with 95% upper and lower UI [Uncertainty intervals].

Denoting the upper and lower UI by  $UI_{\pm}$  and  $UI_{-}$ , the associated standard deviation  $\sigma$  is given by the equation

$$\sigma = (UI_{\pm} - UI_{-})/3.92$$

So, for any given year for which we have data, the means can be tested. The value of the zero mean, unit variance residual statistic and  $\frac{m_1 - m_2}{\sqrt{\sigma_1^2 + \sigma_2^2}}$  should be recorded in order to perform the analyses.

### Calculating the variance of the mean

Suppose we have a distribution (Equation 3) in which the variances of  $p_1$  and  $p_2$  are  $s_1^2$  and  $s_2^2$  respectively. The mean of the distribution is given by equation 2, the variance of the mean is given by

$$\sigma^2 = \frac{1}{4}(b_0 \pm b_1 - b_2 - b_3)^2 s_1^2 \pm \frac{1}{4}(b_1 - b_3)^2 s_2^2$$

Equation 6

The optimal inclusion of dissimilar (complementary) data

Suppose we have two measurements  $N(p_1, s_1^2)$  and  $N(p_2, s_2^2)$  for, say, the percentage obese for two sections of a community – e.g rural and urban, male and female. Suppose that the rural population has  $n_1$  members and the urban population has  $n_2$  members. Thus, a person drawn at random from the whole population has a probability  $\pi_1$  of being rural and  $\pi_2$  of being urban where

$$\pi_1 = \frac{n_1}{n_1 + n_2}, \quad \pi_2 = \frac{n_2}{n_1 + n_2}$$

The probability (and variance) the same random person being obese is

$$p(\text{obese}) = p(\text{obese}|\text{rural})p(\text{rural}) + p(\text{obese}|\text{urban})p(\text{urban})$$

$$p_{ob} = p_1 \pi_1 + p_2 \pi_2$$

$$\sigma_{ob}^2 = \pi_1^2 s_1^2 + \pi_2^2 s_2^2$$

The optimal combination of similar data

Suppose we have two independent measurements  $N(p_1, s_1^2)$  and  $N(p_2, s_2^2)$  of some quantity  $p$ . The optimal (Bayesian) combination of the two is given as  $N\left(p_1 + \frac{s_1^2}{s_1^2 + s_2^2}(p_2 - p_1), \frac{s_1^2 s_2^2}{s_1^2 + s_2^2}\right)$ . The new mean lies between the  $p_1$  and  $p_2$ ; the new variance is less than both  $s_1^2$  and  $s_2^2$ . [ $N(x, s^2)$  is a normal distribution with mean  $x$  and variance  $s^2$ .]

Variable age grouping

We suppose that the set {a labels age groups} of distributions are  $\{p_{a1}(t), p_{a2}(t), p_{a3}(t)\}$ . We need consider only the first two values (subscripts 1 and 2 - the third is determined by the condition that the sum is unity). The probabilities, here regarded as random variables, are supposed to grow linearly with time

$$p_{ai}(t) = p_{ai}(t_0) + (t - t_0) \dot{p}_{ai}(t_0)$$

Each of these two equations can be written as the vector equation

$$\begin{pmatrix} p_{ai}(t) \\ \dot{p}_{ai}(t) \end{pmatrix} = \begin{pmatrix} 1 & t - t_0 \\ 0 & 1 \end{pmatrix} \begin{pmatrix} p_{ai}(t_0) \\ \dot{p}_{ai}(t_0) \end{pmatrix} \equiv \Phi(t - t_0) \begin{pmatrix} p_{ai}(t_0) \\ \dot{p}_{ai}(t_0) \end{pmatrix}$$

Equation 7

The quantity  $p_a(t)$  and its time derivative are themselves random variables. Supposing they are normally distributed and their mean and covariance are denoted  $X_{ai}$  and  $P_{ai}$  respectively, then Equation 7 implies the two matrix equations:

$$X_{ai}(t) = \Phi(t - t_0) X_{ai}(t_0)$$

$$P_{ai}(t) = \Phi(t - t_0) P_{ai}(t_0) \Phi^T(t - t_0)$$

Equation 8

It is conventional to drop the explicit time dependence in favour of the more compact notation that relates the predicted values  $(\hat{X}, \hat{P})$  to the previous best estimate  $(\tilde{X}, \tilde{P})$

$$\hat{X}_{ai} = \Phi \tilde{X}_{ai}$$

$$\hat{P}_{ai} = \Phi \tilde{P}_{ai} \Phi^T$$

Equation 9

At a new data point – a measurement  $z$  of  $p_{ai}(t)$  with variance  $\sigma_z^2$  say – the predicted values are optimally combined with the measured values via Bayes’ rule to give the well-known Kalman Bucy equations, that here can be written

$$\tilde{X}_{ai} = \hat{X}_{ai} + K(z - H\hat{X}_{ai})$$

$$\tilde{P}_{ai} = (I - KH)P_{ai}$$

$$K = \hat{P}_{ai}H^T(H\hat{P}_{ai}K^T + \sigma_z^2)^{-1}$$

$$H \equiv (1 \ 0)$$

Computing of distribution from one plot and the mean

Assuming BMI cuts  $B_0=15, B_1=25, B_2=30, B_3=45$  and a 3-dimensional BMI distribution  $\{p_1(t), p_2(t), p_3(t)\}$

where, for all times  $t$ , the probabilities  $\{p_i\}$  must add to 1:

$$p_1 + p_2 + p_3 = 1$$

**d) Micro simulation – BMI growth model**

The following diagram is a schematic of the microsimulation model:

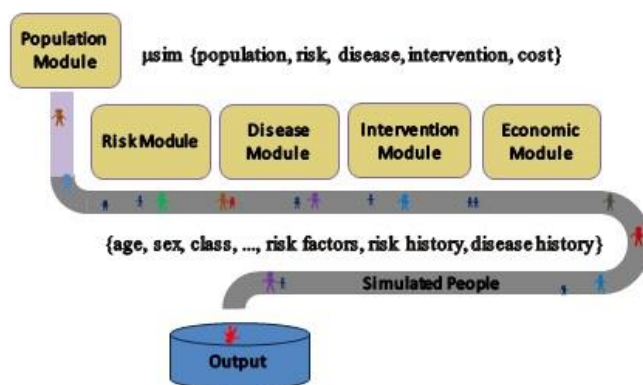

This illustrates the different modules involved in the microsimulation. A population of individuals are simulated based on known population statistics. An individual can be born and die in the model and

has a specific risk (based on the risk distribution entered) of contracting, surviving and dying from a particular disease. An individual may be subject to a particular intervention in any given year that will change their risk trajectory.

The distribution of BMI in the population is estimated using regression analysis stratified by both sex ( $S$ ) and age group ( $A=0-9, 10-19, 20-29, \dots, 70-79, 80+$ ). The fitted models are extrapolated to forecast the distribution of BMI groups in the future. For each sex-and-age-group stratum, the set of cross-sectional, time-dependent, discrete distributions of BMI groups,  $D = \{P_g(t) | g = 1, \dots, 5; t > 0\}$ , is used to manufacture BMI growth models for individual members of the population. This is done in a way that guarantees that the cross-sectional BMI group distributions obtained by simulation under the growth models match the BMI group distributions of the observed data. The details are as follows;

For each such discrete distribution in  $D$ , there is a continuous counterpart. Let  $\beta$  denote BMI in the continuous scale and let  $f(\beta|A, S, t)$  be the probability density function of  $\beta$  for age group  $A$  and sex  $S$  at time  $t$ . Then

$$P_g(t|A, S) = \int_{\beta \in g} f(\beta|A, S, t) d\beta. \quad (4)$$

Equations (3) and (4) both refer to the same quantity. However, equation (4) uses the definition of a probability density function to express the age-and-sex-specific percentage of individuals in BMI group  $g$  at time  $t$ . Equation (3) gives an estimate of the this quantity using model (1) for all  $g=0, \dots, 5$ . The cumulative distribution function of  $\beta$  is

$$F(\beta|A, S, t) = \int_0^\beta f(\beta|A, S, t) d\beta. \quad (5)$$

At a time  $t$ , a person with sex  $S$  belonging to the age group  $A$  is said to be on the  $p$ -th percentile of this distribution if  $F(\beta|A, S, t) = p/100$ . Given the cross-sectional information of  $D$ , it is possible to simulate longitudinal trajectories by forming pseudo cohorts within the population. A key requirement for these sets of longitudinal trajectories is that they reproduce the cross-sectional distribution of BMI groups for any year with available data. The method adopted here and in the earlier Foresight report (1) is based on the assumption that people's BMI changes throughout their lives in such a way that they always stay on the same BMI percentile. As they age, individuals move from one age group to another and their BMI changes so that they remain on the same percentile but of a different distribution. This rule is not too far from the truth; and has as a result that relatively fat people stay relatively fat and relatively thin people stay relatively thin. Crucially it meets the important condition that the cross-sectional BMI group distributions obtained by simulation match the BMI group distributions of the observed data. This can be seen as follows:

When the population's BMI distributions by sex and age are known for all years (by extrapolation of fitted model (3)), a person who is in age group  $A$  and who grows ten year older will at some time move into the next age group  $A'$  and will have a BMI that was described first by the distribution  $f(\beta|A, S, t)$  and then at the later time  $t'$  by the distribution  $f(\beta|A', S, t')$ . If the BMI of that individual is on the  $p^{\text{th}}$  percentile of the BMI distribution, his BMI will change from  $\beta$  to  $\beta'$  so that

$$\beta = F^{-1}\left(\frac{p}{100} \mid A, S, t\right) \quad (6)$$

$$\beta' = F^{-1}\left(\frac{p}{100} \mid A', S, t'\right) \Rightarrow \beta' = F^{-1}(F(\beta \mid A, S, t) \mid A', S, t') \quad (7)$$

Where  $F^{-1}$  is the inverse function of the cumulative distribution function of  $\beta$ . (7) guarantees that the transformation taking the random variable  $\beta$  to  $\beta'$  ensures the correct cross-sectional distribution at  $t'$ .

The micro simulation both generates individuals from the BMI distributions of the set  $D$  and, once generated, grows the individual's BMI in a way that is also determined by the set  $D$ . It is possible to implement equation 7 as a suitably fast algorithm.

#### Micro simulation: Birth, disease and death models.

Simulated people are generated with the correct demographic statistics in the simulation's start-year. In this year women are stochastically allocated the number and years of birth of their children – these are generated from known fertility and mother's age at birth statistics (valid in the start-year). If a woman has children then those children are generated as members of the simulation in the appropriate birth year.

In the course of their lives, simulated people can die from one of the BMI related diseases that they might have acquired or from some other cause. The probabilities that a person of a given age and gender dies from a cause other than a BMI related disease are calculated in terms of known death and disease statistics valid in the start-year and are held constant over the course of the simulation. The death rates from BMI related diseases will change as a consequence of the population's changing BMI distribution.

#### References

- (1) McPherson K, Marsh T, Brown M. Foresight report on obesity. *Lancet* 2007; **37**: 1755.
- (2) Finucane, Mariel M; Stevens, Gretchen A; Cowan, Melanie J; Danaei, Goodarz; Lin, John K et al. National, regional, and global trends in body-mass index since 1980: systematic analysis of health examination surveys and epidemiological studies with 960 country-years and 9.1 million participants. *Lancet* 2011; 377: 9765
- (3) Imperial College London. Global Burden of Metabolic Risk Factors of Chronic Diseases.
  - a. [www5.imperial.ac.uk/medicine/metabolic\\_risks/bmi/](http://www5.imperial.ac.uk/medicine/metabolic_risks/bmi/) (accessed May 20, 2013).
- (4) Patel J.K. and Read C.B. Handbook of the Normal Distribution, 2<sup>nd</sup> edition. Mathematics: CRC Press 1996.



1  
2  
3  
4  
5  
6  
7  
8  
9  
10  
11  
12  
13  
14  
15  
16  
17  
18  
19  
20  
21  
22  
23  
24  
25  
26  
27  
28  
29  
30  
31  
32  
33  
34  
35  
36  
37  
38  
39  
40  
41  
42  
43  
44  
45  
46  
47

Appendix 3. Table of disease reference for each country

| Country  | Disease        | Incidence                 | Prevalence        | Mortality      | Survival             |
|----------|----------------|---------------------------|-------------------|----------------|----------------------|
| Albania  | Diabetes       | Converted from prevalence | Shapo et al, 2004 | Non-fatal      | Non-fatal            |
|          | CHD            | UK proxy                  |                   | WHO, 2008      | Czech Republic proxy |
|          | Stroke         | Hungary proxy             |                   | WHO, 2008      | Estonia proxy        |
|          | Hypertension   | Shapo et al, 2004         | Shapo et al, 2004 | Non-fatal      | Non-fatal            |
|          | Osteoarthritis | UK proxy                  |                   | Non-fatal      | Non-fatal            |
|          | Cancers        |                           |                   |                |                      |
|          | Breast         | Globocan, 2008            |                   | Globocan, 2008 | Slovenia proxy       |
|          | Colorectal     | Globocan, 2008            |                   | Globocan, 2008 | Estonia proxy        |
|          | Corpus uteri   | Globocan, 2008            |                   | Globocan, 2008 | Czech proxy          |
|          | Kidney         | Globocan, 2008            |                   | Globocan, 2008 | Estonia proxy        |
|          | Liver          | Globocan, 2008            |                   | Globocan, 2008 | Lithuania proxy      |
|          | Oesophagus     | Globocan, 2008            |                   | Globocan, 2008 | Poland proxy         |
| Pancreas | Globocan, 2008 |                           | Globocan, 2008    | Poland proxy   |                      |
| Andorra  | Diabetes       | Spain proxy               |                   | Non-fatal      | Non-fatal            |
|          | CHD            | Spain proxy               |                   | Spain proxy    | Spain proxy          |
|          | Stroke         | Spain proxy               |                   | Spain proxy    | Spain proxy          |
|          | Hypertension   | Spain proxy               |                   | Non-fatal      | Non-fatal            |
|          | Osteoarthritis | UK proxy                  |                   | Non-fatal      | Non-fatal            |
|          | Cancers        |                           |                   |                |                      |
|          | Breast         | Spain proxy               |                   | Spain proxy    | Spain proxy          |
|          | Colorectal     | Spain proxy               |                   | Spain proxy    | Spain proxy          |
|          | Corpus uteri   | Spain proxy               |                   | Spain proxy    | Spain proxy          |
|          | Kidney         | Spain proxy               |                   | Spain proxy    | Spain proxy          |
|          | Liver          | Spain proxy               |                   | Spain proxy    | Spain proxy          |
|          | Oesophagus     | Spain proxy               |                   | Spain proxy    | Spain proxy          |
| Pancreas | Spain proxy    |                           | Spain proxy       | Spain proxy    |                      |

| Country    | Disease        | Incidence                 | Prevalence               | Mortality        | Survival               |
|------------|----------------|---------------------------|--------------------------|------------------|------------------------|
| Armenia    | Diabetes       | Converted from prevalence | Ezzati, 2008             | Non-fatal        | Non-fatal              |
|            | CHD            | Georgia proxy             |                          | WHO, 2008        | Georgia proxy          |
|            | Stroke         | Georgia proxy             |                          | WHO, 2008        | Georgia proxy          |
|            | Hypertension   | Converted from prevalence | DHS, 2005                | Non-fatal        | Non-fatal              |
|            | Osteoarthritis | UK proxy                  |                          | Non-fatal        | Non-fatal              |
|            | Cancers        |                           |                          |                  |                        |
|            | Breast         | Globocan, 2008            |                          | Globocan, 2008   | Belarus proxy          |
|            | Colorectal     | Globocan, 2008            |                          | Globocan, 2008   | Belarus proxy          |
|            | Corpus uteri   | Globocan, 2008            |                          | Globocan, 2008   | Belarus proxy          |
|            | Kidney         | Globocan, 2008            |                          | Globocan, 2008   | Belarus proxy          |
|            | Liver          | Globocan, 2008            |                          | Globocan, 2008   | Belarus proxy          |
|            | Oesophagus     | Globocan, 2008            |                          | Globocan, 2008   | Belarus proxy          |
| Pancreas   | Globocan, 2008 |                           | Globocan, 2008           | Belarus proxy    |                        |
| Austria    | Diabetes       | Converted from prevalence | Statistics Austria, 2007 | Non-fatal        | Non-fatal              |
|            | CHD            | Converted from prevalence | Statistics Austria, 2007 | WHO 2008         | UK proxy               |
|            | Stroke         | Truelsen et al, 2006      |                          | WHO 2008         | UK proxy               |
|            | Hypertension   | Converted from prevalence | Statistics Austria, 2007 | Non-fatal        | Non-fatal              |
|            | Osteoarthritis | UK proxy                  |                          | Non-fatal        | Non-fatal              |
|            | Cancers        |                           |                          |                  |                        |
|            | Breast         | Globocan, 2008            |                          | Globocan, 2008   | Verdecchia et al, 2007 |
|            | Colorectal     | Globocan, 2008            |                          | Globocan, 2008   | Verdecchia et al, 2007 |
|            | Corpus uteri   | Globocan, 2008            |                          | Globocan, 2008   | Verdecchia et al, 2007 |
|            | Kidney         | Globocan, 2008            |                          | Globocan, 2008   | Verdecchia et al, 2007 |
|            | Liver          | Globocan, 2008            |                          | Globocan, 2008   | Sant et al, 2009       |
|            | Oesophagus     | Globocan, 2008            |                          | Globocan, 2008   | Sant et al, 2009       |
| Pancreas   | Globocan, 2008 |                           | Globocan, 2008           | Sant et al, 2009 |                        |
| Azerbaijan | Diabetes       | Converted from prevalence | DHS, 2006                | Non-fatal        | Non-fatal              |
|            | CHD            | Georgia proxy             |                          | WHO, 2008        | Georgia proxy          |
|            | Stroke         | Aliyev, 2008              |                          | WHO, 2008        | Georgia proxy          |
|            | Hypertension   | Converted from prevalence | DHS, 2006                | Non-fatal        | Non-fatal              |
|            | Osteoarthritis | UK proxy                  |                          | Non-fatal        | Non-fatal              |
|            | Cancers        |                           |                          |                  |                        |
|            | Breast         | Globocan, 2008            |                          | Globocan, 2008   | Belarus proxy          |
|            | Colorectal     | Globocan, 2008            |                          | Globocan, 2008   | Belarus proxy          |
|            | Corpus uteri   | Globocan, 2008            |                          | Globocan, 2008   | Belarus proxy          |
|            | Kidney         | Globocan, 2008            |                          | Globocan, 2008   | Belarus proxy          |
|            | Liver          | Globocan, 2008            |                          | Globocan, 2008   | Belarus proxy          |
|            | Oesophagus     | Globocan, 2008            |                          | Globocan, 2008   | Belarus proxy          |
| Pancreas   | Globocan, 2008 |                           | Globocan, 2008           | Belarus proxy    |                        |

| Country                | Disease        | Incidence                 | Prevalence                       | Mortality            | Survival               |
|------------------------|----------------|---------------------------|----------------------------------|----------------------|------------------------|
| Belarus                | Diabetes       | Converted from prevalence | Ezzati, 2008                     | Non-fatal            | Non-fatal              |
|                        | CHD            | Russia proxy              |                                  | WHO, 2008            | Russia proxy           |
|                        | Stroke         | Kulesh et al, 2010        |                                  | WHO, 2008            | Kulesh et al, 2010     |
|                        | Hypertension   | Converted from prevalence | Balashenko NS, 2011              | Non-fatal            | Non-fatal              |
|                        | Osteoarthritis | UK proxy                  |                                  | Non-fatal            | Non-fatal              |
|                        | Cancers        |                           |                                  |                      |                        |
|                        | Breast         | Globocan, 2008            |                                  | Globocan, 2008       | Zalutsky et al, 2005   |
|                        | Colorectal     | Globocan, 2008            |                                  | Globocan, 2008       | Zalutsky et al, 2005   |
|                        | Corpus uteri   | Globocan, 2008            |                                  | Globocan, 2008       | Zalutsky et al, 2005   |
|                        | Kidney         | Globocan, 2008            |                                  | Globocan, 2008       | Zalutsky et al, 2005   |
|                        | Liver          | Globocan, 2008            |                                  | Globocan, 2008       | Zalutsky et al, 2005   |
|                        | Oesophagus     | Globocan, 2008            |                                  | Globocan, 2008       | Zalutsky et al, 2005   |
| Pancreas               | Globocan, 2008 |                           | Globocan, 2008                   | Zalutsky et al, 2005 |                        |
| Belgium                | Diabetes       | Converted from prevalence | Institute of Public Health, 2008 | Non-fatal            | Non-fatal              |
|                        | CHD            | Converted from prevalence | Institute of Public Health, 2008 | WHO 2008             | Euroheart, 2008        |
|                        | Stroke         | Truelsen et al, 2006      | Institute of Public Health, 2008 | WHO 2008             | UK proxy               |
|                        | Hypertension   | Converted from prevalence | Institute of Public Health, 2008 | Non-fatal            | Non-fatal              |
|                        | Osteoarthritis | Converted from prevalence | Institute of Public Health, 2008 | Non-fatal            | Non-fatal              |
|                        | Cancers        |                           |                                  |                      |                        |
|                        | Breast         | Globocan, 2008            |                                  | Globocan, 2008       | Verdecchia et al, 2007 |
|                        | Colorectal     | Globocan, 2008            |                                  | Globocan, 2008       | Verdecchia et al, 2007 |
|                        | Corpus uteri   | Globocan, 2008            |                                  | Globocan, 2008       | Verdecchia et al, 2007 |
|                        | Kidney         | Globocan, 2008            |                                  | Globocan, 2008       | Verdecchia et al, 2007 |
|                        | Liver          | Globocan, 2008            |                                  | Globocan, 2008       | Sant et al, 2009       |
|                        | Oesophagus     | Globocan, 2008            |                                  | Globocan, 2008       | Sant et al, 2009       |
| Pancreas               | Globocan, 2008 |                           | Globocan, 2008                   | Sant et al, 2009     |                        |
| Bosnia and Herzegovina | Diabetes       | Converted from prevalence | Ezzati, 2008                     | Non-fatal            | Non-fatal              |
|                        | CHD            | UK proxy                  |                                  | WHO, 2008            | Czech proxy            |
|                        | Stroke         | Converted from prevalence | Vasilj et al, 2006               | WHO, 2008            | Smajlovic at al, 2006  |
|                        | Hypertension   | Converted from prevalence | Pilav, 2006                      | Non-fatal            | Non-fatal              |
|                        | Osteoarthritis | UK proxy                  |                                  | Non-fatal            | Non-fatal              |
|                        | Cancers        |                           |                                  |                      |                        |
|                        | Breast         | Globocan, 2008            |                                  | Globocan, 2008       | Slovenia proxy         |
|                        | Colorectal     | Globocan, 2008            |                                  | Globocan, 2008       | Estonia proxy          |
|                        | Corpus uteri   | Globocan, 2008            |                                  | Globocan, 2008       | Czech proxy            |
|                        | Kidney         | Globocan, 2008            |                                  | Globocan, 2008       | Estonia proxy          |
|                        | Liver          | Globocan, 2008            |                                  | Globocan, 2008       | Lithuania proxy        |
|                        | Oesophagus     | Globocan, 2008            |                                  | Globocan, 2008       | Poland proxy           |
| Pancreas               | Globocan, 2008 |                           | Globocan, 2008                   | Poland proxy         |                        |

| Country  | Disease               | Incidence                 | Prevalence   | Mortality              | Survival                     |
|----------|-----------------------|---------------------------|--------------|------------------------|------------------------------|
| Bulgaria | <b>Diabetes</b>       | Converted from prevalence | Ezzati, 2008 | Non-fatal<br>WHO, 2008 | Non-fatal<br>Czech proxy     |
|          | <b>CHD</b>            | UK proxy                  |              |                        |                              |
|          | <b>Stroke</b>         | Powles et al, 2002        |              |                        |                              |
|          | <b>Hypertension</b>   | UK proxy                  |              |                        |                              |
|          | <b>Osteoarthritis</b> | UK proxy                  |              |                        |                              |
|          | <b>Cancers</b>        |                           |              |                        |                              |
|          | <b>Breast</b>         | Globocan, 2008            |              |                        |                              |
|          | <b>Colorectal</b>     | Globocan, 2008            |              |                        |                              |
|          | <b>Corpus uteri</b>   | Globocan, 2008            |              |                        |                              |
|          | <b>Kidney</b>         | Globocan, 2008            |              |                        |                              |
|          | <b>Liver</b>          | Globocan, 2008            |              |                        |                              |
|          | <b>Oesophagus</b>     | Globocan, 2008            |              |                        |                              |
|          | <b>Pancreas</b>       | Globocan, 2008            |              |                        |                              |
| Croatia  | <b>Diabetes</b>       | Converted from prevalence | Ezzati, 2008 | Non-fatal<br>WHO, 2008 | Non-fatal<br>Czech proxy     |
|          | <b>CHD</b>            | UK proxy                  |              |                        |                              |
|          | <b>Stroke</b>         | Hungary proxy             |              |                        |                              |
|          | <b>Hypertension</b>   | Uhernick et al, 2009      |              |                        |                              |
|          | <b>Osteoarthritis</b> | UK proxy                  |              |                        |                              |
|          | <b>Cancers</b>        |                           |              |                        |                              |
|          | <b>Breast</b>         | Globocan, 2008            |              |                        |                              |
|          | <b>Colorectal</b>     | Globocan, 2008            |              |                        |                              |
|          | <b>Corpus uteri</b>   | Globocan, 2008            |              |                        |                              |
|          | <b>Kidney</b>         | Globocan, 2008            |              |                        |                              |
|          | <b>Liver</b>          | Globocan, 2008            |              |                        |                              |
|          | <b>Oesophagus</b>     | Globocan, 2008            |              |                        |                              |
|          | <b>Pancreas</b>       | Globocan, 2008            |              |                        |                              |
| Cyprus   | <b>Diabetes</b>       | Converted from prevalence | Cystat, 2008 | Non-fatal<br>WHO 2008  | Non-fatal<br>Euroheart, 2008 |
|          | <b>CHD</b>            | Cystat, 2008              |              |                        |                              |
|          | <b>Stroke</b>         | Truelsen et al, 2006      |              |                        |                              |
|          | <b>Hypertension</b>   | Converted from prevalence | Cystat, 2008 | Non-fatal<br>WHO 2008  | Non-fatal<br>UK proxy        |
|          | <b>Osteoarthritis</b> | Converted from prevalence |              |                        |                              |
|          | <b>Cancers</b>        |                           |              |                        |                              |
|          | <b>Breast</b>         | Globocan, 2008            | Cystat, 2008 | Non-fatal<br>WHO 2008  | Non-fatal<br>France proxy    |
|          | <b>Colorectal</b>     | Globocan, 2008            |              |                        |                              |
|          | <b>Corpus uteri</b>   | Globocan, 2008            |              |                        |                              |
|          | <b>Kidney</b>         | Globocan, 2008            |              |                        |                              |
|          | <b>Liver</b>          | Globocan, 2008            |              |                        |                              |
|          | <b>Oesophagus</b>     | Globocan, 2008            |              |                        |                              |
|          | <b>Pancreas</b>       | Globocan, 2008            |              |                        |                              |

1  
2  
3  
4  
5  
6  
7  
8  
9  
10  
11  
12  
13  
14  
15  
16  
17  
18  
19  
20  
21  
22  
23  
24  
25  
26  
27  
28  
29  
30  
31  
32  
33  
34  
35  
36  
37  
38  
39  
40  
41  
42  
43  
44  
45  
46  
47

| Country        | Disease        | Incidence                 | Prevalence                  | Mortality          | Survival                        |
|----------------|----------------|---------------------------|-----------------------------|--------------------|---------------------------------|
| Czech Republic | Diabetes       | Converted from prevalence | Ezzati, 2008                | Non-fatal          | Non-fatal                       |
|                | CHD            | UK proxy                  |                             | WHO 2008           | Euroheart, 2008                 |
|                | Stroke         | Truelsen et al, 2006      |                             | WHO 2008           | Estonia proxy                   |
|                | Hypertension   | UK proxy                  |                             | Non-fatal          | Non-fatal                       |
|                | Osteoarthritis | UK proxy                  |                             | Non-fatal          | Non-fatal                       |
|                | Cancers        |                           |                             |                    |                                 |
|                | Breast         | Globocan, 2008            |                             | Globocan, 2008     | Verdecchia et al, 2007          |
|                | Colorectal     | Globocan, 2008            |                             | Globocan, 2008     | Verdecchia et al, 2007          |
|                | Corpus uteri   | Globocan, 2008            |                             | Globocan, 2008     | Verdecchia et al, 2007          |
|                | Kidney         | Globocan, 2008            |                             | Globocan, 2008     | Verdecchia et al, 2007          |
|                | Liver          | Globocan, 2008            |                             | Globocan, 2008     | Sant et al, 2009                |
|                | Oesophagus     | Globocan, 2008            |                             | Globocan, 2008     | Sant et al, 2009                |
| Pancreas       | Globocan, 2008 | Globocan, 2008            | Globocan, 2008              | Sant et al, 2009   |                                 |
| Denmark        | Diabetes       | Steno 2010                | National Health Survey 2010 | Non-fatal          | Non-fatal                       |
|                | CHD            | Converted from prevalence |                             | WHO 2008           | Euroheart, 2008                 |
|                | Stroke         | Truelsen et al, 2006      |                             | WHO 2008           | EU Chronic Disease Report, 2007 |
|                | Hypertension   | Converted from prevalence |                             | Non-fatal          | Non-fatal                       |
|                | Osteoarthritis | Converted from prevalence |                             | Non-fatal          | Non-fatal                       |
|                | Cancers        |                           |                             |                    |                                 |
|                | Breast         | Globocan, 2008            |                             | Globocan, 2008     | Sant et al, 2009                |
|                | Colorectal     | Globocan, 2008            |                             | Globocan, 2008     | Sant et al, 2009                |
|                | Corpus uteri   | Globocan, 2008            |                             | Globocan, 2008     | Sant et al, 2009                |
|                | Kidney         | Globocan, 2008            |                             | Globocan, 2008     | Sant et al, 2009                |
|                | Liver          | Globocan, 2008            |                             | Globocan, 2008     | Sant et al, 2009                |
|                | Oesophagus     | Globocan, 2008            |                             | Globocan, 2008     | Sant et al, 2009                |
| Pancreas       | Globocan, 2008 | Globocan, 2008            | Globocan, 2008              | Sant et al, 2009   |                                 |
| Estonia        | Diabetes       | Converted from prevalence | Ezzati, 2008                | Non-fatal          | Non-fatal                       |
|                | CHD            | UK proxy                  |                             | WHO 2008           | Czech proxy                     |
|                | Stroke         | Truelsen et al, 2006      |                             | WHO 2008           | Vibo et al, 2007                |
|                | Hypertension   | UK proxy                  |                             | Non-fatal          | Non-fatal                       |
|                | Osteoarthritis | UK proxy                  |                             | Non-fatal          | Non-fatal                       |
|                | Cancers        |                           |                             |                    |                                 |
|                | Breast         | Globocan, 2008            |                             | Globocan, 2008     | Gondos et al, 2008              |
|                | Colorectal     | Globocan, 2008            |                             | Globocan, 2008     | Gondos et al, 2008              |
|                | Corpus uteri   | Globocan, 2008            |                             | Globocan, 2008     | Gondos et al, 2008              |
|                | Kidney         | Globocan, 2008            |                             | Globocan, 2008     | Gondos et al, 2008              |
|                | Liver          | Globocan, 2008            |                             | Globocan, 2008     | Gondos et al, 2008              |
|                | Oesophagus     | Globocan, 2008            |                             | Globocan, 2008     | Gondos et al, 2008              |
| Pancreas       | Globocan, 2008 | Globocan, 2008            | Globocan, 2008              | Gondos et al, 2008 |                                 |

| Country  | Disease        | Incidence                    | Prevalence                        | Mortality      | Survival               |
|----------|----------------|------------------------------|-----------------------------------|----------------|------------------------|
| Finland  | Diabetes       | Finnish Health Survey, 2011  | Finnish Health Survey, 2000       | Non-fatal      | Non-fatal              |
|          | CHD            | THL/KTL database, 2009       |                                   | WHO 2008       | THL database 2008      |
|          | Stroke         | Truelsen et al, 2006         |                                   | WHO 2008       | THL database 2008      |
|          | Hypertension   | Finnish Health Survey, 2011  |                                   | Non-fatal      | Non-fatal              |
|          | Osteoarthritis | Converted from prevalence    |                                   | Non-fatal      | Non-fatal              |
|          | Cancers        |                              |                                   |                |                        |
|          | Breast         | Globocan, 2008               |                                   | Globocan, 2008 | Verdecchia et al, 2007 |
|          | Colorectal     | Globocan, 2008               |                                   | Globocan, 2008 | Verdecchia et al, 2007 |
|          | Corpus uteri   | Globocan, 2008               |                                   | Globocan, 2008 | Verdecchia et al, 2007 |
|          | Kidney         | Globocan, 2008               |                                   | Globocan, 2008 | Verdecchia et al, 2007 |
|          | Liver          | Globocan, 2008               |                                   | Globocan, 2008 | Sant et al, 2009       |
|          | Oesophagus     | Globocan, 2008               |                                   | Globocan, 2008 | Sant et al, 2009       |
| Pancreas | Globocan, 2008 | Globocan, 2008               | Sant et al, 2009                  |                |                        |
| France   | Diabetes       | Personal comm. INVS, 2006    | Personal comm. Entred, 2009       | Non-fatal      | Non-fatal              |
|          | CHD            | UK proxy                     |                                   | WHO 2008       | Euroheart, 2008        |
|          | Stroke         | Truelsen et al, 2006         |                                   | WHO 2008       | UK proxy               |
|          | Hypertension   | Radi et al, 2004             |                                   | Non-fatal      | Non-fatal              |
|          | Osteoarthritis | UK proxy                     |                                   | Non-fatal      | Non-fatal              |
|          | Cancers        |                              |                                   |                |                        |
|          | Breast         | Globocan, 2008               |                                   | Globocan, 2008 | Verdecchia et al, 2007 |
|          | Colorectal     | Globocan, 2008               |                                   | Globocan, 2008 | Verdecchia et al, 2007 |
|          | Corpus uteri   | Globocan, 2008               |                                   | Globocan, 2008 | Verdecchia et al, 2007 |
|          | Kidney         | Globocan, 2008               |                                   | Globocan, 2008 | Verdecchia et al, 2007 |
|          | Liver          | Globocan, 2008               |                                   | Globocan, 2008 | Sant et al, 2009       |
|          | Oesophagus     | Globocan, 2008               |                                   | Globocan, 2008 | Sant et al, 2009       |
| Pancreas | Globocan, 2008 | Globocan, 2008               | Sant et al, 2009                  |                |                        |
| Georgia  | Diabetes       | Converted from prevalence    | Ezzati, 2008                      | Non-fatal      | Non-fatal              |
|          | CHD            | Iskadze et al, 2011          |                                   | WHO, 2008      | NCDC, 2009             |
|          | Stroke         | Tsiskaridze et al, 2000-2003 | Personal communication B. Roberts | WHO, 2008      | Tsiskaridze et al      |
|          | Hypertension   | Converted from prevalence    |                                   | Non-fatal      | Non-fatal              |
|          | Osteoarthritis | UK proxy                     |                                   | Non-fatal      | Non-fatal              |
|          | Cancers        |                              |                                   |                |                        |
|          | Breast         | Globocan, 2008               |                                   | Globocan, 2008 | NCDC, 2010             |
|          | Colorectal     | Globocan, 2008               |                                   | Globocan, 2008 | Belarus proxy          |
|          | Corpus uteri   | Globocan, 2008               |                                   | Globocan, 2008 | Belarus proxy          |
|          | Kidney         | Globocan, 2008               |                                   | Globocan, 2008 | Belarus proxy          |
|          | Liver          | Globocan, 2008               |                                   | Globocan, 2008 | Belarus proxy          |
|          | Oesophagus     | Globocan, 2008               |                                   | Globocan, 2008 | Belarus proxy          |
| Pancreas | Globocan, 2008 | Globocan, 2008               | Belarus proxy                     |                |                        |

1  
2  
3  
4  
5  
6  
7  
8  
9  
10  
11  
12  
13  
14  
15  
16  
17  
18  
19  
20  
21  
22  
23  
24  
25  
26  
27  
28  
29  
30  
31  
32  
33  
34  
35  
36  
37  
38  
39  
40  
41  
42  
43  
44  
45  
46  
47

| Country | Disease        | Incidence                 | Prevalence   | Mortality      | Survival               |
|---------|----------------|---------------------------|--------------|----------------|------------------------|
| Germany | Diabetes       | Wilke et al 2012 (2008)   |              | Non-fatal      | Non-fatal              |
|         | CHD            | UK proxy                  |              | WHO 2008       | Euroheart, 2008        |
|         | Stroke         | Truelsen et al, 2006      |              | WHO 2008       | UK proxy               |
|         | Hypertension   | UK proxy                  |              | Non-fatal      | Non-fatal              |
|         | Osteoarthritis | UK proxy                  |              | Non-fatal      | Non-fatal              |
|         | Cancers        |                           |              |                |                        |
|         | Breast         | Globocan, 2008            |              | Globocan, 2008 | Verdecchia et al, 2007 |
|         | Colorectal     | Globocan, 2008            |              | Globocan, 2008 | Verdecchia et al, 2007 |
|         | Corpus uteri   | Globocan, 2008            |              | Globocan, 2008 | Verdecchia et al, 2007 |
|         | Kidney         | Globocan, 2008            |              | Globocan, 2008 | Verdecchia et al, 2007 |
|         | Liver          | Globocan, 2008            |              | Globocan, 2008 | Sant et al, 2009       |
|         | Oesophagus     | Globocan, 2008            |              | Globocan, 2008 | Sant et al, 2009       |
|         | Pancreas       | Globocan, 2008            |              | Globocan, 2008 | Sant et al, 2009       |
| Greece  | Diabetes       | Converted from prevalence | Ezzati, 2008 | Non-fatal      | Non-fatal              |
|         | CHD            | UK proxy                  |              | WHO 2008       | UK proxy               |
|         | Stroke         | Truelsen et al, 2006      |              | WHO 2008       | UK proxy               |
|         | Hypertension   | UK proxy                  |              | Non-fatal      | Non-fatal              |
|         | Osteoarthritis | UK proxy                  |              | Non-fatal      | Non-fatal              |
|         | Cancers        |                           |              |                |                        |
|         | Breast         | Globocan, 2008            |              | Globocan, 2008 | France proxy           |
|         | Colorectal     | Globocan, 2008            |              | Globocan, 2008 | France proxy           |
|         | Corpus uteri   | Globocan, 2008            |              | Globocan, 2008 | France proxy           |
|         | Kidney         | Globocan, 2008            |              | Globocan, 2008 | France proxy           |
|         | Liver          | Globocan, 2008            |              | Globocan, 2008 | France proxy           |
|         | Oesophagus     | Globocan, 2008            |              | Globocan, 2008 | France proxy           |
|         | Pancreas       | Globocan, 2008            |              | Globocan, 2008 | France proxy           |
| Hungary | Diabetes       | Converted from prevalence | Ezzati, 2008 | Non-fatal      | Non-fatal              |
|         | CHD            | UK proxy                  |              | WHO 2008       | Czech proxy            |
|         | Stroke         | Truelsen et al, 2006      |              | WHO 2008       | Estonia proxy          |
|         | Hypertension   | UK proxy                  |              | Non-fatal      | Non-fatal              |
|         | Osteoarthritis | UK proxy                  |              | Non-fatal      | Non-fatal              |
|         | Cancers        |                           |              |                |                        |
|         | Breast         | Globocan, 2008            |              | Globocan, 2008 | Slovenia proxy         |
|         | Colorectal     | Globocan, 2008            |              | Globocan, 2008 | Estonia proxy          |
|         | Corpus uteri   | Globocan, 2008            |              | Globocan, 2008 | Czech proxy            |
|         | Kidney         | Globocan, 2008            |              | Globocan, 2008 | Estonia proxy          |
|         | Liver          | Globocan, 2008            |              | Globocan, 2008 | Lithuania proxy        |
|         | Oesophagus     | Globocan, 2008            |              | Globocan, 2008 | Poland proxy           |
|         | Pancreas       | Globocan, 2008            |              | Globocan, 2008 | Poland proxy           |



| Country | Disease        | Incidence                 | Prevalence               | Mortality      | Survival                        |
|---------|----------------|---------------------------|--------------------------|----------------|---------------------------------|
| Iceland | Diabetes       | Converted from prevalence | Ezzati, 2008             | Non-fatal      | Non-fatal                       |
|         | CHD            | UK proxy                  |                          | WHO, 2008      | Euroheart, 2012                 |
|         | Stroke         | Truelsen et al, 2006      |                          | WHO, 2008      | Euroheart, 2012                 |
|         | Hypertension   | UK proxy                  |                          | Non-fatal      | Non-fatal                       |
|         | Osteoarthritis | Converted from prevalence | Ingvarsson et al, 1999   | Non-fatal      | Non-fatal                       |
|         | Cancers        |                           |                          |                |                                 |
|         | Breast         | Globocan, 2008            |                          | Globocan, 2008 | Verdecchia et al, 2007          |
|         | Colorectal     | Globocan, 2008            |                          | Globocan, 2008 | Verdecchia et al, 2007          |
|         | Corpus uteri   | Globocan, 2008            |                          | Globocan, 2008 | Verdecchia et al, 2007          |
|         | Kidney         | Globocan, 2008            |                          | Globocan, 2008 | Verdecchia et al, 2007          |
|         | Liver          | Globocan, 2008            |                          | Globocan, 2008 | Sant et al, 2009                |
|         | Oesophagus     | Globocan, 2008            |                          | Globocan, 2008 | Sant et al, 2009                |
|         | Pancreas       | Globocan, 2008            |                          | Globocan, 2008 | Sant et al, 2009                |
| Ireland | Diabetes       | Converted from prevalence | Personal comm. L. Keaver | Non-fatal      | Non-fatal                       |
|         | CHD            | Personal comm. L. Keaver  |                          | WHO 2008       | Personal comm. L. Keaver        |
|         | Stroke         | Truelsen et al, 2006      |                          | WHO 2008       | Personal comm. L. Keaver        |
|         | Hypertension   | Converted from prevalence | Personal comm. L. Keaver | Non-fatal      | Non-fatal                       |
|         | Osteoarthritis | Converted from prevalence | Personal comm. L. Keaver | Non-fatal      | Non-fatal                       |
|         | Cancers        |                           |                          |                |                                 |
|         | Breast         | Globocan, 2008            |                          | Globocan, 2008 | Verdecchia et al, 2007          |
|         | Colorectal     | Globocan, 2008            |                          | Globocan, 2008 | Verdecchia et al, 2007          |
|         | Corpus uteri   | Globocan, 2008            |                          | Globocan, 2008 | Verdecchia et al, 2007          |
|         | Kidney         | Globocan, 2008            |                          | Globocan, 2008 | Verdecchia et al, 2007          |
|         | Liver          | Globocan, 2008            |                          | Globocan, 2008 | Sant et al, 2009                |
|         | Oesophagus     | Globocan, 2008            |                          | Globocan, 2008 | Sant et al, 2009                |
|         | Pancreas       | Globocan, 2008            |                          | Globocan, 2008 | Sant et al, 2009                |
| Italy   | Diabetes       | Converted from prevalence | Ezzati, 2008             | Non-fatal      | Non-fatal                       |
|         | CHD            | UK proxy                  |                          | WHO 2008       | Euroheart, 2008                 |
|         | Stroke         | Truelsen et al, 2006      |                          | WHO 2008       | EU chronic disease report, 2007 |
|         | Hypertension   | UK proxy                  |                          | Non-fatal      | Non-fatal                       |
|         | Osteoarthritis | UK proxy                  |                          | Non-fatal      | Non-fatal                       |
|         | Cancers        |                           |                          |                |                                 |
|         | Breast         | Globocan, 2008            |                          | Globocan, 2008 | Verdecchia et al, 2007          |
|         | Colorectal     | Globocan, 2008            |                          | Globocan, 2008 | Verdecchia et al, 2007          |
|         | Corpus uteri   | Globocan, 2008            |                          | Globocan, 2008 | Verdecchia et al, 2007          |
|         | Kidney         | Globocan, 2008            |                          | Globocan, 2008 | Verdecchia et al, 2007          |
|         | Liver          | Globocan, 2008            |                          | Globocan, 2008 | Gondos et al, 2008              |
|         | Oesophagus     | Globocan, 2008            |                          | Globocan, 2008 | Gondos et al, 2008              |
|         | Pancreas       | Globocan, 2008            |                          | Globocan, 2008 | Gondos et al, 2008              |



| Country         | Disease               | Incidence                 | Prevalence                        | Mortality         | Survival       |
|-----------------|-----------------------|---------------------------|-----------------------------------|-------------------|----------------|
| Israel          | <b>Diabetes</b>       | Converted from prevalence | Pers. communication N. Goldberger | Non-fatal         | Non-fatal      |
|                 | <b>CHD</b>            | Kark et al, 2005          |                                   | Kark et al, 2005  | Ehnheart, 2009 |
|                 | <b>Stroke</b>         | Converted from prevalence | Pers. communication N. Goldberger | WHO, 2008         | Ehnheart, 2009 |
|                 | <b>Hypertension</b>   | Converted from prevalence | Pers. communication N. Goldberger | Non-fatal         | Non-fatal      |
|                 | <b>Osteoarthritis</b> | UK proxy                  |                                   | Non-fatal         | Non-fatal      |
|                 | <b>Cancers</b>        |                           |                                   |                   |                |
|                 | <b>Breast</b>         | Globocan, 2008            |                                   | Globocan, 2008    |                |
|                 | <b>Colorectal</b>     | Globocan, 2008            |                                   | Globocan, 2008    |                |
|                 | <b>Corpus uteri</b>   | Globocan, 2008            |                                   | Globocan, 2008    |                |
|                 | <b>Kidney</b>         | Globocan, 2008            |                                   | Globocan, 2008    |                |
|                 | <b>Liver</b>          | Globocan, 2008            |                                   | Globocan, 2008    |                |
|                 | <b>Oesophagus</b>     | Globocan, 2008            |                                   | Globocan, 2008    |                |
| <b>Pancreas</b> | Globocan, 2008        |                           | Globocan, 2008                    | Rozen et al, 2009 |                |
| Kazakhstan      | <b>Diabetes</b>       | Converted from prevalence | Ezzati, 2008                      | Non-fatal         | Non-fatal      |
|                 | <b>CHD</b>            | Uzbekistan proxy          |                                   | WHO, 2008         | Georgia proxy  |
|                 | <b>Stroke</b>         | Azerbaijan proxy          |                                   | WHO, 2008         | Georgia proxy  |
|                 | <b>Hypertension</b>   | Converted from prevalence | Personal communication B. Roberts | Non-fatal         | Non-fatal      |
|                 | <b>Osteoarthritis</b> | UK proxy                  |                                   | Non-fatal         | Non-fatal      |
|                 | <b>Cancers</b>        |                           |                                   |                   |                |
|                 | <b>Breast</b>         | Globocan, 2008            |                                   | Globocan, 2008    |                |
|                 | <b>Colorectal</b>     | Globocan, 2008            |                                   | Globocan, 2008    |                |
|                 | <b>Corpus uteri</b>   | Globocan, 2008            |                                   | Globocan, 2008    |                |
|                 | <b>Kidney</b>         | Globocan, 2008            |                                   | Globocan, 2008    |                |
|                 | <b>Liver</b>          | Globocan, 2008            |                                   | Globocan, 2008    |                |
|                 | <b>Oesophagus</b>     | Globocan, 2008            |                                   | Globocan, 2008    |                |
| <b>Pancreas</b> | Globocan, 2008        |                           | Globocan, 2008                    |                   |                |
| Kyrgyzstan      | <b>Diabetes</b>       | Converted from prevalence | Ezzati, 2008                      | Non-fatal         | Non-fatal      |
|                 | <b>CHD</b>            | Uzbekistan proxy          |                                   | WHO, 2008         | Georgia proxy  |
|                 | <b>Stroke</b>         | Azerbaijan proxy          |                                   | WHO, 2008         | Georgia proxy  |
|                 | <b>Hypertension</b>   | Converted from prevalence | Young et al, 2005                 | Non-fatal         | Non-fatal      |
|                 | <b>Osteoarthritis</b> | UK proxy                  |                                   | Non-fatal         | Non-fatal      |
|                 | <b>Cancers</b>        |                           |                                   |                   |                |
|                 | <b>Breast</b>         | Globocan, 2008            |                                   | Globocan, 2008    |                |
|                 | <b>Colorectal</b>     | Globocan, 2008            |                                   | Globocan, 2008    |                |
|                 | <b>Corpus uteri</b>   | Globocan, 2008            |                                   | Globocan, 2008    |                |
|                 | <b>Kidney</b>         | Globocan, 2008            |                                   | Globocan, 2008    |                |
|                 | <b>Liver</b>          | Globocan, 2008            |                                   | Globocan, 2008    |                |
|                 | <b>Oesophagus</b>     | Globocan, 2008            |                                   | Globocan, 2008    |                |
| <b>Pancreas</b> | Globocan, 2008        |                           | Globocan, 2008                    |                   |                |

| Country    | Disease        | Incidence                 | Prevalence          | Mortality      | Survival                  |
|------------|----------------|---------------------------|---------------------|----------------|---------------------------|
| Latvia     | Diabetes       | Converted from prevalence | Ezzati, 2008        | Non-fatal      | Non-fatal                 |
|            | CHD            | UK proxy                  |                     | WHO 2008       | Czech proxy               |
|            | Stroke         | Truelsen et al, 2006      |                     | WHO 2008       | Estonia proxy             |
|            | Hypertension   | UK proxy                  |                     | Non-fatal      | Non-fatal                 |
|            | Osteoarthritis | UK proxy                  |                     | Non-fatal      | Non-fatal                 |
|            | Cancers        |                           |                     |                |                           |
|            | Breast         | Globocan, 2008            |                     | Globocan, 2008 | Slovenia proxy            |
|            | Colorectal     | Globocan, 2008            |                     | Globocan, 2008 | Estonia proxy             |
|            | Corpus uteri   | Globocan, 2008            |                     | Globocan, 2008 | Czech proxy               |
|            | Kidney         | Globocan, 2008            |                     | Globocan, 2008 | Estonia proxy             |
|            | Liver          | Globocan, 2008            |                     | Globocan, 2008 | Lithuania proxy           |
|            | Oesophagus     | Globocan, 2008            |                     | Globocan, 2008 | Poland proxy              |
| Pancreas   | Globocan, 2008 | Globocan, 2008            | Poland proxy        |                |                           |
| Lithuania  | Diabetes       | Converted from prevalence | Ezzati, 2008        | Non-fatal      | Non-fatal                 |
|            | CHD            | UK proxy                  |                     | WHO 2008       | Euroheart, 2008           |
|            | Stroke         | Truelsen et al, 2006      |                     | WHO 2008       | EU chronic disease report |
|            | Hypertension   | UK proxy                  |                     | Non-fatal      | Non-fatal                 |
|            | Osteoarthritis | UK proxy                  |                     | Non-fatal      | Non-fatal                 |
|            | Cancers        |                           |                     |                |                           |
|            | Breast         | Globocan, 2008            |                     | Globocan, 2008 | Gondos et al, 2008        |
|            | Colorectal     | Globocan, 2008            |                     | Globocan, 2008 | Gondos et al, 2008        |
|            | Corpus uteri   | Globocan, 2008            |                     | Globocan, 2008 | Gondos et al, 2008        |
|            | Kidney         | Globocan, 2008            |                     | Globocan, 2008 | Gondos et al, 2008        |
|            | Liver          | Globocan, 2008            |                     | Globocan, 2008 | Gondos et al, 2008        |
|            | Oesophagus     | Globocan, 2008            |                     | Globocan, 2008 | Gondos et al, 2008        |
| Pancreas   | Globocan, 2008 | Globocan, 2008            | Gondos et al, 2008  |                |                           |
| Luxembourg | Diabetes       | Converted from prevalence | Alkerwi et al, 2010 | Non-fatal      | Non-fatal                 |
|            | CHD            | UK proxy                  | Alkerwi et al, 2010 | WHO 2008       | UK proxy                  |
|            | Stroke         | Truelsen et al, 2006      |                     | WHO 2008       | UK proxy                  |
|            | Hypertension   | Converted from prevalence |                     | Non-fatal      | Non-fatal                 |
|            | Osteoarthritis | UK proxy                  |                     | Non-fatal      | Non-fatal                 |
|            | Cancers        |                           |                     |                |                           |
|            | Breast         | Globocan, 2008            |                     | Globocan, 2008 | France proxy              |
|            | Colorectal     | Globocan, 2008            |                     | Globocan, 2008 | France proxy              |
|            | Corpus uteri   | Globocan, 2008            |                     | Globocan, 2008 | France proxy              |
|            | Kidney         | Globocan, 2008            |                     | Globocan, 2008 | France proxy              |
|            | Liver          | Globocan, 2008            |                     | Globocan, 2008 | France proxy              |
|            | Oesophagus     | Globocan, 2008            |                     | Globocan, 2008 | France proxy              |
| Pancreas   | Globocan, 2008 | Globocan, 2008            |                     | France proxy   |                           |

1  
2  
3  
4  
5  
6  
7  
8  
9  
10  
11  
12  
13  
14  
15  
16  
17  
18  
19  
20  
21  
22  
23  
24  
25  
26  
27  
28  
29  
30  
31  
32  
33  
34  
35  
36  
37  
38  
39  
40  
41  
42  
43  
44  
45  
46  
47

| Country    | Disease        | Incidence                 | Prevalence       | Mortality        | Survival               |  |
|------------|----------------|---------------------------|------------------|------------------|------------------------|--|
| Malta      | Diabetes       | Converted from prevalence | Ezzati, 2008     | Non-fatal        | Non-fatal              |  |
|            | CHD            | UK proxy                  |                  | WHO 2008         | UK proxy               |  |
|            | Stroke         | Truelsen et al, 2006      |                  | WHO 2008         | UK proxy               |  |
|            | Hypertension   | UK proxy                  |                  | Non-fatal        | Non-fatal              |  |
|            | Osteoarthritis | UK proxy                  |                  | Non-fatal        | Non-fatal              |  |
|            | Cancers        |                           |                  |                  |                        |  |
|            | Breast         | Globocan, 2008            |                  | Globocan, 2008   | Verdecchia et al, 2007 |  |
|            | Colorectal     | Globocan, 2008            |                  | Globocan, 2008   | Verdecchia et al, 2007 |  |
|            | Corpus uteri   | Globocan, 2008            |                  | Globocan, 2008   | Verdecchia et al, 2007 |  |
|            | Kidney         | Globocan, 2008            |                  | Globocan, 2008   | Verdecchia et al, 2007 |  |
|            | Liver          | Globocan, 2008            |                  | Globocan, 2008   | Sant et al, 2009       |  |
| Oesophagus | Globocan, 2008 | Globocan, 2008            | Sant et al, 2009 |                  |                        |  |
| Pancreas   | Globocan, 2008 | Globocan, 2008            | Globocan, 2008   | Sant et al, 2009 |                        |  |
| Monaco     | Diabetes       | France proxy              |                  | Non-fatal        | Non-fatal              |  |
|            | CHD            | UK proxy                  |                  | WHO, 2008        | France proxy           |  |
|            | Stroke         | France proxy              |                  | WHO, 2008        | France proxy           |  |
|            | Hypertension   | France proxy              |                  | Non-fatal        | Non-fatal              |  |
|            | Osteoarthritis | UK proxy                  |                  | Non-fatal        | Non-fatal              |  |
|            | Cancers        |                           |                  |                  |                        |  |
|            | Breast         | France proxy              |                  | France proxy     | France proxy           |  |
|            | Colorectal     | France proxy              |                  | France proxy     | France proxy           |  |
|            | Corpus uteri   | France proxy              |                  | France proxy     | France proxy           |  |
|            | Kidney         | France proxy              |                  | France proxy     | France proxy           |  |
|            | Liver          | France proxy              |                  | France proxy     | France proxy           |  |
| Oesophagus | France proxy   | France proxy              | France proxy     |                  |                        |  |
| Pancreas   | France proxy   | France proxy              | France proxy     | France proxy     |                        |  |
| Montenegro | Diabetes       | Converted from prevalence | Ezzati, 2008     | Non-fatal        | Non-fatal              |  |
|            | CHD            | UK proxy                  |                  | WHO, 2008        | Czech proxy            |  |
|            | Stroke         | Hungary proxy             |                  | WHO, 2008        | Estonia proxy          |  |
|            | Hypertension   | UK proxy                  |                  | Non-fatal        | Non-fatal              |  |
|            | Osteoarthritis | UK proxy                  |                  | Non-fatal        | Non-fatal              |  |
|            | Cancers        |                           |                  |                  |                        |  |
|            | Breast         | Globocan, 2008            |                  | Globocan, 2008   | Slovenia proxy         |  |
|            | Colorectal     | Globocan, 2008            |                  | Globocan, 2008   | Estonia proxy          |  |
|            | Corpus uteri   | Globocan, 2008            |                  | Globocan, 2008   | Czech proxy            |  |
|            | Kidney         | Globocan, 2008            |                  | Globocan, 2008   | Estonia proxy          |  |
|            | Liver          | Globocan, 2008            |                  | Globocan, 2008   | Lithuania proxy        |  |
| Oesophagus | Globocan, 2008 | Globocan, 2008            | Poland proxy     |                  |                        |  |
| Pancreas   | Globocan, 2008 | Globocan, 2008            | Globocan, 2008   | Poland proxy     |                        |  |

| Country     | Disease        | Incidence                          | Prevalence                                                                           | Mortality        | Survival                        |
|-------------|----------------|------------------------------------|--------------------------------------------------------------------------------------|------------------|---------------------------------|
| Netherlands | Diabetes       | Ubink-Veltmaat et al, 2003         | Ubink-Veltmaat et al, 2003 (2000)                                                    | Non-fatal        | Non-fatal                       |
|             | CHD            | Netherlands Morbidity Stats (2007) |                                                                                      | WHO 2008         | UK proxy                        |
|             | Stroke         | Truelsen et al, 2006               | Netherlands Morbidity Statistics<br>Netherlands Morbidity Statistics,<br>2011 (2007) | WHO 2008         | UK proxy                        |
|             | Hypertension   | Converted from prevalence          |                                                                                      | Non-fatal        | Non-fatal                       |
|             | Osteoarthritis | Converted from prevalence          |                                                                                      | Non-fatal        | Non-fatal                       |
|             | Cancers        |                                    |                                                                                      |                  |                                 |
|             | Breast         | Globocan, 2008                     |                                                                                      | Globocan, 2008   | Verdecchia et al, 2007          |
|             | Colorectal     | Globocan, 2008                     |                                                                                      | Globocan, 2008   | Verdecchia et al, 2007          |
|             | Corpus uteri   | Globocan, 2008                     |                                                                                      | Globocan, 2008   | Verdecchia et al, 2007          |
|             | Kidney         | Globocan, 2008                     |                                                                                      | Globocan, 2008   | Verdecchia et al, 2007          |
|             | Liver          | Globocan, 2008                     |                                                                                      | Globocan, 2008   | Sant et al, 2009                |
| Oesophagus  | Globocan, 2008 | Globocan, 2008                     | Sant et al, 2009                                                                     |                  |                                 |
| Pancreas    | Globocan, 2008 | Globocan, 2008                     | Globocan, 2008                                                                       | Sant et al, 2009 |                                 |
| Norway      | Diabetes       | Converted from prevalence          | Langhammer et al, 2012                                                               | Non-fatal        | Non-fatal                       |
|             | CHD            | Mannsverk et al, 2011              |                                                                                      | WHO, 2008        | Euroheart, 2012                 |
|             | Stroke         | Truelsen et al, 2006               | Langhammer et al, 2012<br>Langhammer et al, 2012                                     | WHO, 2008        | Euroheart, 2012                 |
|             | Hypertension   | Converted from prevalence          |                                                                                      | Non-fatal        | Non-fatal                       |
|             | Osteoarthritis | Converted from prevalence          |                                                                                      | Non-fatal        | Non-fatal                       |
|             | Cancers        |                                    |                                                                                      |                  |                                 |
|             | Breast         | Globocan, 2008                     |                                                                                      | Globocan, 2008   | Gondos et al, 2008              |
|             | Colorectal     | Globocan, 2008                     |                                                                                      | Globocan, 2008   | Gondos et al, 2008              |
|             | Corpus uteri   | Globocan, 2008                     |                                                                                      | Globocan, 2008   | Gondos et al, 2008              |
|             | Kidney         | Globocan, 2008                     |                                                                                      | Globocan, 2008   | Gondos et al, 2008              |
|             | Liver          | Globocan, 2008                     |                                                                                      | Globocan, 2008   | Gondos et al, 2008              |
| Oesophagus  | Globocan, 2008 | Globocan, 2008                     | Gondos et al, 2008                                                                   |                  |                                 |
| Pancreas    | Globocan, 2008 | Globocan, 2008                     | Gondos et al, 2008                                                                   |                  |                                 |
| Poland      | Diabetes       | Converted from prevalence          | Ezzati, 2008                                                                         | Non-fatal        | Non-fatal                       |
|             | CHD            | UK proxy                           |                                                                                      | WHO 2008         | UK proxy                        |
|             | Stroke         | Wawrzyńczyk et al, 2011            |                                                                                      | WHO 2008         | EU chronic disease report ,2007 |
|             | Hypertension   | UK proxy                           |                                                                                      | Non-fatal        | Non-fatal                       |
|             | Osteoarthritis | UK proxy                           |                                                                                      | Non-fatal        | Non-fatal                       |
|             | Cancers        |                                    |                                                                                      |                  |                                 |
|             | Breast         | Globocan, 2008                     |                                                                                      | Globocan, 2008   | Gondos et al, 2008              |
|             | Colorectal     | Globocan, 2008                     |                                                                                      | Globocan, 2008   | Gondos et al, 2008              |
|             | Corpus uteri   | Globocan, 2008                     |                                                                                      | Globocan, 2008   | Gondos et al, 2008              |
|             | Kidney         | Globocan, 2008                     |                                                                                      | Globocan, 2008   | Gondos et al, 2008              |
|             | Liver          | Globocan, 2008                     |                                                                                      | Globocan, 2008   | Gondos et al, 2008              |
| Oesophagus  | Globocan, 2008 | Globocan, 2008                     | Gondos et al, 2008                                                                   |                  |                                 |
| Pancreas    | Globocan, 2008 | Globocan, 2008                     | Gondos et al, 2008                                                                   |                  |                                 |

1  
2  
3  
4  
5  
6  
7  
8  
9  
10  
11  
12  
13  
14  
15  
16  
17  
18  
19  
20  
21  
22  
23  
24  
25  
26  
27  
28  
29  
30  
31  
32  
33  
34  
35  
36  
37  
38  
39  
40  
41  
42  
43  
44  
45  
46  
47

| Country             | Disease        | Incidence                 | Prevalence                                                             | Mortality                                                     | Survival                                                            |
|---------------------|----------------|---------------------------|------------------------------------------------------------------------|---------------------------------------------------------------|---------------------------------------------------------------------|
| Portugal            | Diabetes       | Converted from prevalence | Ezzati, 2008                                                           | Non-fatal<br>WHO 2008<br>WHO 2008<br>Non-fatal<br>Non-fatal   | Non-fatal<br>UK proxy<br>UK proxy<br>Non-fatal<br>Non-fatal         |
|                     | CHD            | UK proxy                  |                                                                        |                                                               |                                                                     |
|                     | Stroke         | Truelsen et al, 2006      |                                                                        |                                                               |                                                                     |
|                     | Hypertension   | UK proxy                  |                                                                        |                                                               |                                                                     |
|                     | Osteoarthritis | UK proxy                  |                                                                        |                                                               |                                                                     |
|                     | Cancers        |                           |                                                                        |                                                               |                                                                     |
|                     | Breast         | Globocan, 2008            |                                                                        |                                                               |                                                                     |
|                     | Colorectal     | Globocan, 2008            |                                                                        |                                                               |                                                                     |
|                     | Corpus uteri   | Globocan, 2008            |                                                                        |                                                               |                                                                     |
|                     | Kidney         | Globocan, 2008            |                                                                        |                                                               |                                                                     |
|                     | Liver          | Globocan, 2008            |                                                                        |                                                               |                                                                     |
|                     | Oesophagus     | Globocan, 2008            |                                                                        |                                                               |                                                                     |
| Pancreas            | Globocan, 2008 |                           |                                                                        |                                                               |                                                                     |
| Republic of Moldova | Diabetes       | Converted from prevalence | Ezzati, 2008<br>Ukraine proxy<br><br>Personal communication B. Roberts | Non-fatal<br>WHO, 2008<br>WHO, 2008<br>Non-fatal<br>Non-fatal | Non-fatal<br>UK proxy<br>Ukraine proxy<br>Non-fatal<br>Non-fatal    |
|                     | CHD            | Converted from prevalence |                                                                        |                                                               |                                                                     |
|                     | Stroke         | Ukraine proxy             |                                                                        |                                                               |                                                                     |
|                     | Hypertension   | Converted from prevalence |                                                                        |                                                               |                                                                     |
|                     | Osteoarthritis | UK proxy                  |                                                                        |                                                               |                                                                     |
|                     | Cancers        |                           |                                                                        |                                                               |                                                                     |
|                     | Breast         | Globocan, 2008            |                                                                        |                                                               |                                                                     |
|                     | Colorectal     | Globocan, 2008            |                                                                        |                                                               |                                                                     |
|                     | Corpus uteri   | Globocan, 2008            |                                                                        |                                                               |                                                                     |
|                     | Kidney         | Globocan, 2008            |                                                                        |                                                               |                                                                     |
|                     | Liver          | Globocan, 2008            |                                                                        |                                                               |                                                                     |
|                     | Oesophagus     | Globocan, 2008            |                                                                        |                                                               |                                                                     |
| Pancreas            | Globocan, 2008 |                           |                                                                        |                                                               |                                                                     |
| Romania             | Diabetes       | Converted from prevalence | Ezzati, 2008                                                           | Non-fatal<br>WHO 2008<br>WHO 2008<br>Non-fatal<br>Non-fatal   | Non-fatal<br>Czech proxy<br>Estonia proxy<br>Non-fatal<br>Non-fatal |
|                     | CHD            | UK proxy                  |                                                                        |                                                               |                                                                     |
|                     | Stroke         | Hungary proxy             |                                                                        |                                                               |                                                                     |
|                     | Hypertension   | UK proxy                  |                                                                        |                                                               |                                                                     |
|                     | Osteoarthritis | UK proxy                  |                                                                        |                                                               |                                                                     |
|                     | Cancers        |                           |                                                                        |                                                               |                                                                     |
|                     | Breast         | Globocan, 2008            |                                                                        |                                                               |                                                                     |
|                     | Colorectal     | Globocan, 2008            |                                                                        |                                                               |                                                                     |
|                     | Corpus uteri   | Globocan, 2008            |                                                                        |                                                               |                                                                     |
|                     | Kidney         | Globocan, 2008            |                                                                        |                                                               |                                                                     |
|                     | Liver          | Globocan, 2008            |                                                                        |                                                               |                                                                     |
|                     | Oesophagus     | Globocan, 2008            |                                                                        |                                                               |                                                                     |
| Pancreas            | Globocan, 2008 |                           |                                                                        |                                                               |                                                                     |

| Country            | Disease                                                                                    | Incidence                                                                                  | Prevalence                                                               | Mortality                                                              | Survival                                                            |                                                      |                                                                          |
|--------------------|--------------------------------------------------------------------------------------------|--------------------------------------------------------------------------------------------|--------------------------------------------------------------------------|------------------------------------------------------------------------|---------------------------------------------------------------------|------------------------------------------------------|--------------------------------------------------------------------------|
| Russian Federation | Diabetes                                                                                   | Converted from prevalence                                                                  | Shishkin NS et al, 2005                                                  | Non-fatal<br>Boytsov SA, 2010<br>WHO, 2008                             | Non-fatal<br>Tunstall-Pedoe et al, 1999<br>Feigin et al, 1995       |                                                      |                                                                          |
|                    | CHD                                                                                        | Boytsov SA et al, 2010                                                                     |                                                                          |                                                                        |                                                                     |                                                      |                                                                          |
|                    | Stroke                                                                                     | Feigin et al, 1995                                                                         | Federal State Institute statistics, 2005                                 | Non-fatal<br>Non-fatal                                                 | Non-fatal<br>Non-fatal                                              |                                                      |                                                                          |
|                    | Hypertension                                                                               | Converted from prevalence                                                                  |                                                                          |                                                                        |                                                                     |                                                      |                                                                          |
|                    | Osteoarthritis                                                                             | <a href="http://www.mednet.ru">www.mednet.ru</a>                                           |                                                                          |                                                                        |                                                                     |                                                      |                                                                          |
|                    | Cancers                                                                                    |                                                                                            |                                                                          |                                                                        |                                                                     |                                                      |                                                                          |
|                    | Breast                                                                                     | <a href="http://www.oncology.ru/service/statistics">www.oncology.ru/service/statistics</a> |                                                                          |                                                                        |                                                                     | <a href="http://www.oncology.ru">www.oncology.ru</a> | <a href="http://www.mednet.ru">www.mednet.ru</a>                         |
|                    | Colorectal                                                                                 | <a href="http://www.oncology.ru/service/statistics">www.oncology.ru/service/statistics</a> |                                                                          |                                                                        |                                                                     | <a href="http://www.oncology.ru">www.oncology.ru</a> | <a href="http://www.mednet.ru">www.mednet.ru</a>                         |
|                    | Corpus uteri                                                                               | <a href="http://www.oncology.ru/service/statistics">www.oncology.ru/service/statistics</a> |                                                                          |                                                                        |                                                                     | <a href="http://www.oncology.ru">www.oncology.ru</a> | <a href="http://info.cancerresearchuk.org">info.cancerresearchuk.org</a> |
|                    | Kidney                                                                                     | <a href="http://www.oncology.ru/service/statistics">www.oncology.ru/service/statistics</a> |                                                                          |                                                                        |                                                                     | <a href="http://www.oncology.ru">www.oncology.ru</a> | <a href="http://info.cancerresearchuk.org">info.cancerresearchuk.org</a> |
|                    | Liver                                                                                      | <a href="http://www.oncology.ru/service/statistics">www.oncology.ru/service/statistics</a> |                                                                          |                                                                        |                                                                     | <a href="http://www.oncology.ru">www.oncology.ru</a> | <a href="http://info.cancerresearchuk.org">info.cancerresearchuk.org</a> |
| Oesophagus         | <a href="http://www.oncology.ru/service/statistics">www.oncology.ru/service/statistics</a> | <a href="http://www.oncology.ru">www.oncology.ru</a>                                       | <a href="http://www.mednet.ru">www.mednet.ru</a>                         |                                                                        |                                                                     |                                                      |                                                                          |
| Pancreas           | <a href="http://www.oncology.ru/service/statistics">www.oncology.ru/service/statistics</a> | <a href="http://www.oncology.ru">www.oncology.ru</a>                                       | <a href="http://info.cancerresearchuk.org">info.cancerresearchuk.org</a> |                                                                        |                                                                     |                                                      |                                                                          |
| San Marino         | Diabetes                                                                                   | Italy proxy                                                                                |                                                                          | Non-fatal<br>WHO, 2008<br>WHO, 2008<br>Non-fatal<br>Non-fatal          | Non-fatal<br>Italy proxy<br>Italy proxy<br>Non-fatal<br>Non-fatal   |                                                      |                                                                          |
|                    | CHD                                                                                        | UK proxy                                                                                   |                                                                          |                                                                        |                                                                     |                                                      |                                                                          |
|                    | Stroke                                                                                     | Italy proxy                                                                                |                                                                          |                                                                        |                                                                     |                                                      |                                                                          |
|                    | Hypertension                                                                               | UK proxy                                                                                   |                                                                          |                                                                        |                                                                     |                                                      |                                                                          |
|                    | Osteoarthritis                                                                             | UK proxy                                                                                   |                                                                          |                                                                        |                                                                     |                                                      |                                                                          |
|                    | Cancers                                                                                    |                                                                                            |                                                                          |                                                                        |                                                                     |                                                      |                                                                          |
|                    | Breast                                                                                     | Personal comm. with Dr F. Masi                                                             |                                                                          |                                                                        |                                                                     | Personal comm.                                       | Personal comm.                                                           |
|                    | Colorectal                                                                                 | Personal comm. with Dr F. Masi                                                             |                                                                          |                                                                        |                                                                     | Personal comm.                                       | Personal comm.                                                           |
|                    | Corpus uteri                                                                               | Personal comm. with Dr F. Masi                                                             |                                                                          |                                                                        |                                                                     | Personal comm.                                       | Italy proxy                                                              |
|                    | Kidney                                                                                     | Personal comm. with Dr F. Masi                                                             |                                                                          |                                                                        |                                                                     | Personal comm.                                       | Italy proxy                                                              |
|                    | Liver                                                                                      | Personal comm. with Dr F. Masi                                                             |                                                                          |                                                                        |                                                                     | Personal comm.                                       | Italy proxy                                                              |
| Oesophagus         | Personal comm. with Dr F. Masi                                                             | Personal comm.                                                                             | Italy proxy                                                              |                                                                        |                                                                     |                                                      |                                                                          |
| Pancreas           | Personal comm. with Dr F. Masi                                                             | Personal comm.                                                                             | Personal comm.                                                           |                                                                        |                                                                     |                                                      |                                                                          |
| Serbia             | Diabetes                                                                                   | Serbian diabetes registry, 2010                                                            |                                                                          | Non-fatal<br>ACS registry, 2010<br>WHO, 2008<br>Non-fatal<br>Non-fatal | Non-fatal<br>Czech proxy<br>Estonia proxy<br>Non-fatal<br>Non-fatal |                                                      |                                                                          |
|                    | CHD                                                                                        | Acute coronary syndrome registry, 2010                                                     |                                                                          |                                                                        |                                                                     |                                                      |                                                                          |
|                    | Stroke                                                                                     | Hungary proxy                                                                              |                                                                          |                                                                        |                                                                     |                                                      |                                                                          |
|                    | Hypertension                                                                               | UK proxy                                                                                   |                                                                          |                                                                        |                                                                     |                                                      |                                                                          |
|                    | Osteoarthritis                                                                             | UK proxy                                                                                   |                                                                          |                                                                        |                                                                     |                                                      |                                                                          |
|                    | Cancers                                                                                    |                                                                                            |                                                                          |                                                                        |                                                                     |                                                      |                                                                          |
|                    | Breast                                                                                     | Globocan, 2008                                                                             |                                                                          |                                                                        |                                                                     | Globocan, 2008                                       | Slovenia proxy                                                           |
|                    | Colorectal                                                                                 | Globocan, 2008                                                                             |                                                                          |                                                                        |                                                                     | Globocan, 2008                                       | Estonia proxy                                                            |
|                    | Corpus uteri                                                                               | Globocan, 2008                                                                             |                                                                          |                                                                        |                                                                     | Globocan, 2008                                       | Czech proxy                                                              |
|                    | Kidney                                                                                     | Globocan, 2008                                                                             |                                                                          |                                                                        |                                                                     | Globocan, 2008                                       | Estonia proxy                                                            |
|                    | Liver                                                                                      | Globocan, 2008                                                                             |                                                                          |                                                                        |                                                                     | Globocan, 2008                                       | Lithuania proxy                                                          |
| Oesophagus         | Globocan, 2008                                                                             | Globocan, 2008                                                                             | Poland proxy                                                             |                                                                        |                                                                     |                                                      |                                                                          |
| Pancreas           | Globocan, 2008                                                                             | Globocan, 2008                                                                             | Poland proxy                                                             |                                                                        |                                                                     |                                                      |                                                                          |

1  
2  
3  
4  
5  
6  
7  
8  
9  
10  
11  
12  
13  
14  
15  
16  
17  
18  
19  
20  
21  
22  
23  
24  
25  
26  
27  
28  
29  
30  
31  
32  
33  
34  
35  
36  
37  
38  
39  
40  
41  
42  
43  
44  
45  
46  
47

| Country           | Disease               | Incidence                                           | Prevalence                                | Mortality          | Survival               |
|-------------------|-----------------------|-----------------------------------------------------|-------------------------------------------|--------------------|------------------------|
| Slovakia          | <b>Diabetes</b>       | Preliminary 2011 data personal communication        |                                           | Non-fatal          | Non-fatal              |
|                   | <b>CHD</b>            | Preliminary 2011 data (IHD), personal communication |                                           | WHO 2008           | Czech proxy            |
|                   | <b>Stroke</b>         | Truelsen et al, 2006                                |                                           | WHO 2008           | Estonia proxy          |
|                   | <b>Hypertension</b>   | Preliminary 2011 data personal communication        |                                           | Non-fatal          | Non-fatal              |
|                   | <b>Osteoarthritis</b> | UK proxy                                            |                                           | Non-fatal          | Non-fatal              |
|                   | <b>Cancers</b>        |                                                     |                                           |                    |                        |
|                   | <b>Breast</b>         | Globocan, 2008                                      |                                           | Globocan, 2008     | Sant et al, 2003       |
|                   | <b>Colorectal</b>     | Globocan, 2008                                      |                                           | Globocan, 2008     | Estonia proxy          |
|                   | <b>Corpus uteri</b>   | Globocan, 2008                                      |                                           | Globocan, 2008     | Czech proxy            |
|                   | <b>Kidney</b>         | Globocan, 2008                                      |                                           | Globocan, 2008     | Estonia proxy          |
|                   | <b>Liver</b>          | Globocan, 2008                                      |                                           | Globocan, 2008     | Lithuania proxy        |
| <b>Oesophagus</b> | Globocan, 2008        |                                                     | Globocan, 2008                            | Poland proxy       |                        |
| <b>Pancreas</b>   | Globocan, 2008        |                                                     | Globocan, 2008                            | Poland proxy       |                        |
| Slovenia          | <b>Diabetes</b>       | Converted from prevalence                           | Ezzati, 2008                              | Non-fatal          | Non-fatal              |
|                   | <b>CHD</b>            | UK proxy                                            |                                           | WHO 2008           | Czech proxy            |
|                   | <b>Stroke</b>         | Truelsen et al, 2006                                |                                           | WHO 2008           | Estonia proxy          |
|                   | <b>Hypertension</b>   | UK proxy                                            |                                           | Non-fatal          | Non-fatal              |
|                   | <b>Osteoarthritis</b> | UK proxy                                            |                                           | Non-fatal          | Non-fatal              |
|                   | <b>Cancers</b>        |                                                     |                                           |                    |                        |
|                   | <b>Breast</b>         | Globocan, 2008                                      |                                           | Globocan, 2008     | Gondos et al, 2008     |
|                   | <b>Colorectal</b>     | Globocan, 2008                                      |                                           | Globocan, 2008     | Gondos et al, 2008     |
|                   | <b>Corpus uteri</b>   | Globocan, 2008                                      |                                           | Globocan, 2008     | Gondos et al, 2008     |
|                   | <b>Kidney</b>         | Globocan, 2008                                      |                                           | Globocan, 2008     | Gondos et al, 2008     |
|                   | <b>Liver</b>          | Globocan, 2008                                      |                                           | Globocan, 2008     | Gondos et al, 2008     |
| <b>Oesophagus</b> | Globocan, 2008        |                                                     | Globocan, 2008                            | Gondos et al, 2008 |                        |
| <b>Pancreas</b>   | Globocan, 2008        |                                                     | Globocan, 2008                            | Gondos et al, 2008 |                        |
| Spain             | <b>Diabetes</b>       | Converted from prevalence                           | Encuesta Europea de Salud en Espana, 2009 | Non-fatal          | Non-fatal              |
|                   | <b>CHD</b>            | Encuesta Europea de Salud en Espana                 |                                           | WHO 2008           | Euroheart, 2008        |
|                   | <b>Stroke</b>         | Truelsen et al, 2006                                |                                           | WHO 2008           | UK proxy               |
|                   | <b>Hypertension</b>   | Converted from prevalence                           | Encuesta Europea de Salud en Espana, 2009 | Non-fatal          | Non-fatal              |
|                   | <b>Osteoarthritis</b> | UK proxy                                            |                                           | Non-fatal          | Non-fatal              |
|                   | <b>Cancers</b>        |                                                     |                                           |                    |                        |
|                   | <b>Breast</b>         | Globocan, 2008                                      |                                           | Globocan, 2008     | Verdecchia et al, 2007 |
|                   | <b>Colorectal</b>     | Globocan, 2008                                      |                                           | Globocan, 2008     | Verdecchia et al, 2007 |
|                   | <b>Corpus uteri</b>   | Globocan, 2008                                      |                                           | Globocan, 2008     | Verdecchia et al, 2007 |
|                   | <b>Kidney</b>         | Globocan, 2008                                      |                                           | Globocan, 2008     | Verdecchia et al, 2007 |
|                   | <b>Liver</b>          | Globocan, 2008                                      |                                           | Globocan, 2008     | Sant et al, 2009       |
| <b>Oesophagus</b> | Globocan, 2008        |                                                     | Globocan, 2008                            | Sant et al, 2009   |                        |
| <b>Pancreas</b>   | Globocan, 2008        |                                                     | Globocan, 2008                            | Sant et al, 2009   |                        |



| Country     | Disease                                                                                                                                                     | Incidence                                                                                                                                                                                                                                           | Prevalence                                                                         | Mortality                                                                                                                                                                                       | Survival                                                                                                                                                                                                                                                            |
|-------------|-------------------------------------------------------------------------------------------------------------------------------------------------------------|-----------------------------------------------------------------------------------------------------------------------------------------------------------------------------------------------------------------------------------------------------|------------------------------------------------------------------------------------|-------------------------------------------------------------------------------------------------------------------------------------------------------------------------------------------------|---------------------------------------------------------------------------------------------------------------------------------------------------------------------------------------------------------------------------------------------------------------------|
| Sweden      | Diabetes<br>CHD<br>Stroke<br>Hypertension<br>Osteoarthritis<br>Cancers<br>Breast<br>Colorectal<br>Corpus uteri<br>Kidney<br>Liver<br>Oesophagus<br>Pancreas | Thunander et al, 2008<br>Statistics Sweden, 2010<br>Truelsen et al, 2006<br>Converted from prevalence<br>UK proxy<br><br>Globocan, 2008<br>Globocan, 2008<br>Globocan, 2008<br>Globocan, 2008<br>Globocan, 2008<br>Globocan, 2008<br>Globocan, 2008 | Statistics Sweden, 2010                                                            | Non-fatal<br>WHO 2008<br>WHO 2008<br>Non-fatal<br>Non-fatal<br><br>Globocan, 2008<br>Globocan, 2008<br>Globocan, 2008<br>Globocan, 2008<br>Globocan, 2008<br>Globocan, 2008<br>Globocan, 2008   | Non-fatal<br>Case fatality 2010<br>EU chronic disease report 2007<br>Non-fatal<br>Non-fatal<br><br>Verdecchia et al, 2007<br>Verdecchia et al, 2007<br>Verdecchia et al, 2007<br>Verdecchia et al, 2007<br>Sant et al, 2009<br>Sant et al, 2009<br>Sant et al, 2009 |
| Switzerland | Diabetes<br>CHD<br>Stroke<br>Hypertension<br>Osteoarthritis<br>Cancers<br>Breast<br>Colorectal<br>Corpus uteri<br>Kidney<br>Liver<br>Oesophagus<br>Pancreas | Converted from prevalence<br>UK proxy<br>Truelsen et al, 2006<br>Converted from prevalence<br>UK proxy<br><br>Globocan, 2008<br>Globocan, 2008<br>Globocan, 2008<br>Globocan, 2008<br>Globocan, 2008<br>Globocan, 2008<br>Globocan, 2008            | Swiss Federal Statistics Office, 2007<br><br>Swiss Federal Statistics Office, 2007 | Non-fatal<br>WHO, 2008<br>WHO, 2008<br>Non-fatal<br>Non-fatal<br><br>Globocan, 2008<br>Globocan, 2008<br>Globocan, 2008<br>Globocan, 2008<br>Globocan, 2008<br>Globocan, 2008<br>Globocan, 2008 | Non-fatal<br>Euroheart, 2012<br>Euroheart, 2012<br>Non-fatal<br>Non-fatal<br><br>Gondos et al, 2008<br>Gondos et al, 2008                             |
| Tajikistan  | Diabetes<br>CHD<br>Stroke<br>Hypertension<br>Osteoarthritis<br>Cancers<br>Breast<br>Colorectal<br>Corpus uteri<br>Kidney<br>Liver<br>Oesophagus<br>Pancreas | Converted from prevalence<br>Uzbekistan proxy<br>Azerbaijan proxy<br>Converted from prevalence<br>UK proxy<br><br>Globocan, 2008<br>Globocan, 2008<br>Globocan, 2008<br>Globocan, 2008<br>Globocan, 2008<br>Globocan, 2008<br>Globocan, 2008        | Ezzati, 2008<br><br>Azerbaijan proxy                                               | Non-fatal<br>WHO, 2008<br>WHO, 2008<br>Non-fatal<br>Non-fatal<br><br>Globocan, 2008<br>Globocan, 2008<br>Globocan, 2008<br>Globocan, 2008<br>Globocan, 2008<br>Globocan, 2008<br>Globocan, 2008 | Non-fatal<br>Georgia proxy<br>Georgia proxy<br>Non-fatal<br>Non-fatal<br><br>Kazakhstan proxy<br>Kazakhstan proxy<br>Kazakhstan proxy<br>Kazakhstan proxy<br>Kazakhstan proxy<br>Kazakhstan proxy<br>Kazakhstan proxy                                               |



1  
2  
3  
4  
5  
6  
7  
8  
9  
10  
11  
12  
13  
14  
15  
16  
17  
18  
19  
20  
21  
22  
23  
24  
25  
26  
27  
28  
29  
30  
31  
32  
33  
34  
35  
36  
37  
38  
39  
40  
41  
42  
43  
44  
45  
46  
47

| Country           | Disease        | Incidence                 | Prevalence                               | Mortality        | Survival           |
|-------------------|----------------|---------------------------|------------------------------------------|------------------|--------------------|
| TFYR of Macedonia | Diabetes       | Converted from prevalence | Ezzati, 2008                             | Non-fatal        | Non-fatal          |
|                   | CHD            | UK proxy                  |                                          | WHO, 2008        | Slovenia proxy     |
|                   | Stroke         | Hungary proxy             |                                          | WHO, 2008        | Slovenia proxy     |
|                   | Hypertension   | Albania proxy             |                                          | Non-fatal        | Non-fatal          |
|                   | Osteoarthritis | UK proxy                  |                                          | Non-fatal        | Non-fatal          |
|                   | Cancers        |                           |                                          |                  |                    |
|                   | Breast         | Globocan, 2008            |                                          | Globocan, 2008   | Slovenia proxy     |
|                   | Colorectal     | Globocan, 2008            |                                          | Globocan, 2008   | Estonia proxy      |
|                   | Corpus uteri   | Globocan, 2008            |                                          | Globocan, 2008   | Czech proxy        |
|                   | Kidney         | Globocan, 2008            |                                          | Globocan, 2008   | Estonia proxy      |
|                   | Liver          | Globocan, 2008            |                                          | Globocan, 2008   | Lithuania proxy    |
| Oesophagus        | Globocan, 2008 | Globocan, 2008            | Poland proxy                             |                  |                    |
| Pancreas          | Globocan, 2008 | Globocan, 2008            | Globocan, 2008                           | Poland proxy     |                    |
| Turkey            | Diabetes       | Converted from prevalence | Yumuk VD et al, 2005<br>Onat et al, 1993 | Non-fatal        | Non-fatal          |
|                   | CHD            | Converted from prevalence |                                          | WHO, 2008        | Georgia proxy      |
|                   | Stroke         | Greece proxy              |                                          | WHO, 2008        | Kumral et al, 1998 |
|                   | Hypertension   | Arici et al, 2010         |                                          | Non-fatal        | Non-fatal          |
|                   | Osteoarthritis | UK proxy                  |                                          | Non-fatal        | Non-fatal          |
|                   | Cancers        |                           |                                          |                  |                    |
|                   | Breast         | Globocan, 2008            |                                          | Globocan, 2008   | Belarus proxy      |
|                   | Colorectal     | Globocan, 2008            |                                          | Globocan, 2008   | Belarus proxy      |
|                   | Corpus uteri   | Globocan, 2008            |                                          | Globocan, 2008   | Belarus proxy      |
|                   | Kidney         | Globocan, 2008            |                                          | Globocan, 2008   | Belarus proxy      |
|                   | Liver          | Globocan, 2008            |                                          | Globocan, 2008   | Belarus proxy      |
| Oesophagus        | Globocan, 2008 | Globocan, 2008            | Belarus proxy                            |                  |                    |
| Pancreas          | Globocan, 2008 | Globocan, 2008            | Globocan, 2008                           | Belarus proxy    |                    |
| Turkmenistan      | Diabetes       | Converted from prevalence | Ezzati, 2008<br><br>Azerbaijan proxy     | Non-fatal        | Non-fatal          |
|                   | CHD            | Uzbekistan proxy          |                                          | WHO, 2008        | Georgia proxy      |
|                   | Stroke         | Azerbaijan proxy          |                                          | WHO, 2008        | Georgia proxy      |
|                   | Hypertension   | Converted from prevalence |                                          | Non-fatal        | Non-fatal          |
|                   | Osteoarthritis | UK proxy                  |                                          | Non-fatal        | Non-fatal          |
|                   | Cancers        |                           |                                          |                  |                    |
|                   | Breast         | Globocan, 2008            |                                          | Globocan, 2008   | Kazakhstan proxy   |
|                   | Colorectal     | Globocan, 2008            |                                          | Globocan, 2008   | Kazakhstan proxy   |
|                   | Corpus uteri   | Globocan, 2008            |                                          | Globocan, 2008   | Kazakhstan proxy   |
|                   | Kidney         | Globocan, 2008            |                                          | Globocan, 2008   | Kazakhstan proxy   |
|                   | Liver          | Globocan, 2008            |                                          | Globocan, 2008   | Kyrgyzstan proxy   |
| Oesophagus        | Globocan, 2008 | Globocan, 2008            | Kazakhstan proxy                         |                  |                    |
| Pancreas          | Globocan, 2008 | Globocan, 2008            | Globocan, 2008                           | Kazakhstan proxy |                    |

| Country    | Disease                       | Incidence                     | Prevalence                    | Mortality                     | Survival               |
|------------|-------------------------------|-------------------------------|-------------------------------|-------------------------------|------------------------|
| Ukraine    | Diabetes                      | Converted from prevalence     | Ezzati, 2008                  | Non-fatal                     | Non-fatal              |
|            | CHD                           | Converted from prevalence     | Gorbas IM, 2009               | WHO, 2008                     | Russia proxy           |
|            | Stroke                        | Mihalka et al, 2001           |                               | WHO, 2008                     | Mihalka et al, 2001    |
|            | Hypertension                  | Converted from prevalence     | DHS, 2007                     | Non-fatal                     | Non-fatal              |
|            | Osteoarthritis                | Converted from prevalence     | Povorozniuk VV, 2009          | Non-fatal                     | Non-fatal              |
|            | Cancers                       |                               |                               |                               |                        |
|            | Breast                        | Globocan, 2008                |                               | Globocan, 2008                | Korchinskaya A, 2012   |
|            | Colorectal                    | Globocan, 2008                |                               | Globocan, 2008                | Belarus proxy          |
|            | Corpus uteri                  | Globocan, 2008                |                               | Globocan, 2008                | Konanaychin, 2011      |
|            | Kidney                        | Globocan, 2008                |                               | Globocan, 2008                | Kondratenko, 2009      |
|            | Liver                         | Globocan, 2008                |                               | Globocan, 2008                | Belarus proxy          |
|            | Oesophagus                    | Globocan, 2008                |                               | Globocan, 2008                | Ganul et al, 2012      |
| Pancreas   | Globocan, 2008                |                               | Globocan, 2008                | Schepotin et al, 2011         |                        |
| UK         | Diabetes                      | BHF statistics                |                               | Non-fatal                     | Non-fatal              |
|            | CHD                           | EU CVD statistics 2008        |                               | BHF statistics                | Euroheart, 2008        |
|            | Stroke                        | BHF Stroke statistics, 2009   |                               | BHF statistics                | BHF statistics         |
|            | Hypertension                  | BHF statistics                |                               | Non-fatal                     | Non-fatal              |
|            | Osteoarthritis                |                               |                               | Non-fatal                     | Non-fatal              |
|            | Cancers                       |                               |                               |                               |                        |
|            | Breast                        | UK Cancer Research statistics |                               | UK Cancer Research statistics | Verdecchia et al, 2007 |
|            | Colorectal                    | UK Cancer Research statistics |                               | UK Cancer Research statistics | Verdecchia et al, 2007 |
|            | Corpus uteri                  | UK Cancer Research statistics |                               | UK Cancer Research statistics | Verdecchia et al, 2007 |
|            | Kidney                        | UK Cancer Research statistics |                               | UK Cancer Research statistics | Verdecchia et al, 2007 |
|            | Liver                         | UK Cancer Research statistics |                               | UK Cancer Research statistics | Sant et al, 2009       |
|            | Oesophagus                    | UK Cancer Research statistics |                               | UK Cancer Research statistics | Sant et al, 2009       |
| Pancreas   | UK Cancer Research statistics |                               | UK Cancer Research statistics | Sant et al, 2009              |                        |
| Uzbekistan | Diabetes                      | Converted from prevalence     | Sultanov, 2008                | Non-fatal                     | Non-fatal              |
|            | CHD                           | Mamutov et al, 2012           |                               | WHO, 2008                     | Georgia proxy          |
|            | Stroke                        | Azerbaijan proxy              |                               | WHO, 2008                     | Georgia proxy          |
|            | Hypertension                  | Converted from prevalence     | DHS, 2002                     | Non-fatal                     | Non-fatal              |
|            | Osteoarthritis                | UK proxy                      |                               | Non-fatal                     | Non-fatal              |
|            | Cancers                       |                               |                               |                               |                        |
|            | Breast                        | Globocan, 2008                |                               | Globocan, 2008                | Kazakhstan proxy       |
|            | Colorectal                    | Globocan, 2008                |                               | Globocan, 2008                | Kazakhstan proxy       |
|            | Corpus uteri                  | Globocan, 2008                |                               | Globocan, 2008                | Kazakhstan proxy       |
|            | Kidney                        | Globocan, 2008                |                               | Globocan, 2008                | Kazakhstan proxy       |
|            | Liver                         | Globocan, 2008                |                               | Globocan, 2008                | Kyrgyzstan proxy       |
|            | Oesophagus                    | Globocan, 2008                |                               | Globocan, 2008                | Kazakhstan proxy       |
| Pancreas   | Globocan, 2008                |                               | Globocan, 2008                | Kazakhstan proxy              |                        |

### Appendix 4. Population pyramids by country in 2010

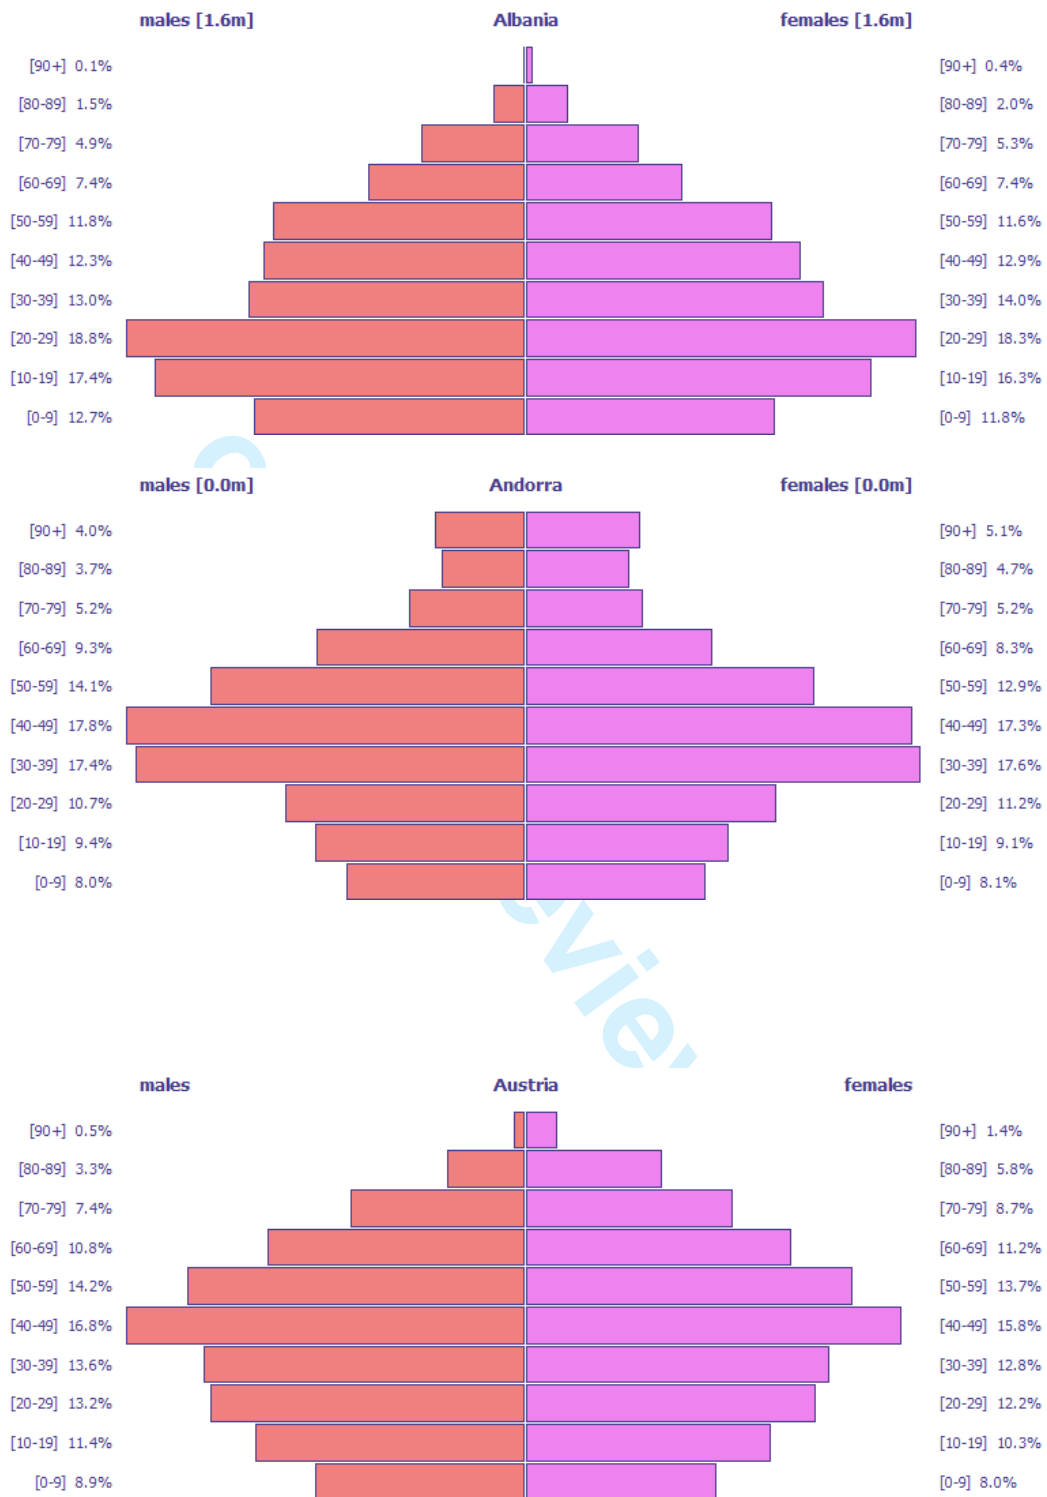

1  
2  
3  
4  
5  
6  
7  
8  
9  
10  
11  
12  
13  
14  
15  
16  
17  
18  
19  
20  
21  
22  
23  
24  
25  
26  
27  
28  
29  
30  
31  
32  
33  
34  
35  
36  
37  
38  
39  
40  
41  
42  
43  
44  
45  
46  
47  
48  
49  
50  
51  
52  
53  
54  
55  
56  
57  
58  
59  
60

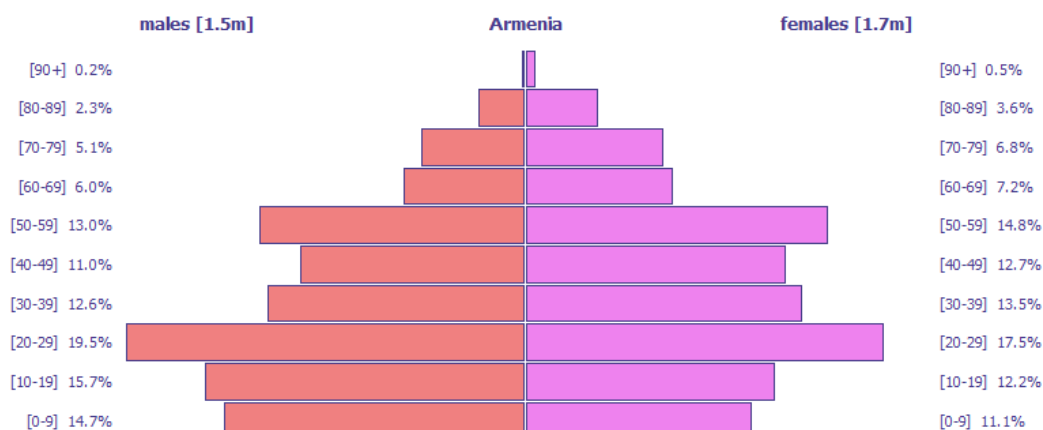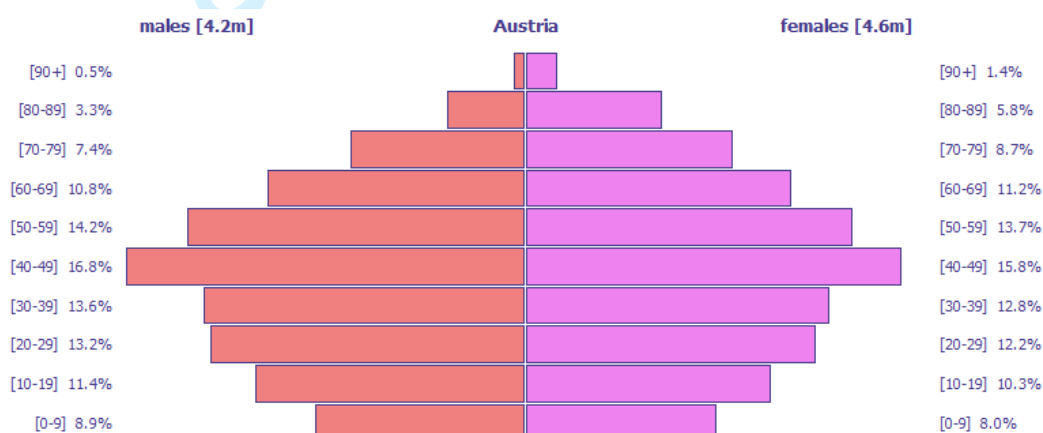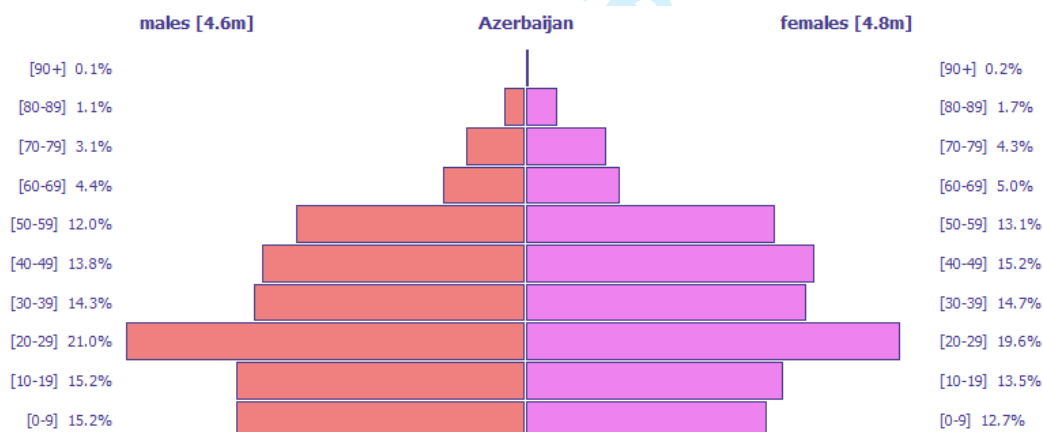

1  
2  
3  
4  
5  
6  
7  
8  
9  
10  
11  
12  
13  
14  
15  
16  
17  
18  
19  
20  
21  
22  
23  
24  
25  
26  
27  
28  
29  
30  
31  
32  
33  
34  
35  
36  
37  
38  
39  
40  
41  
42  
43  
44  
45  
46  
47  
48  
49  
50  
51  
52  
53  
54  
55  
56  
57  
58  
59  
60

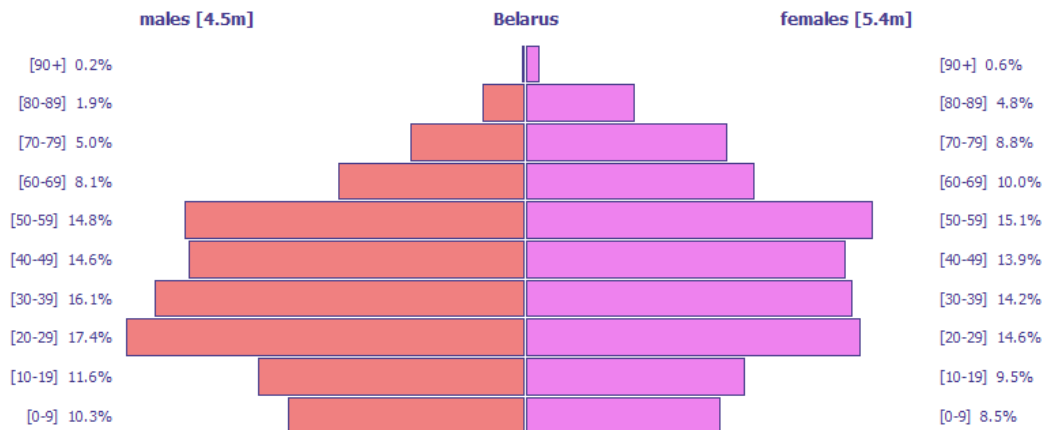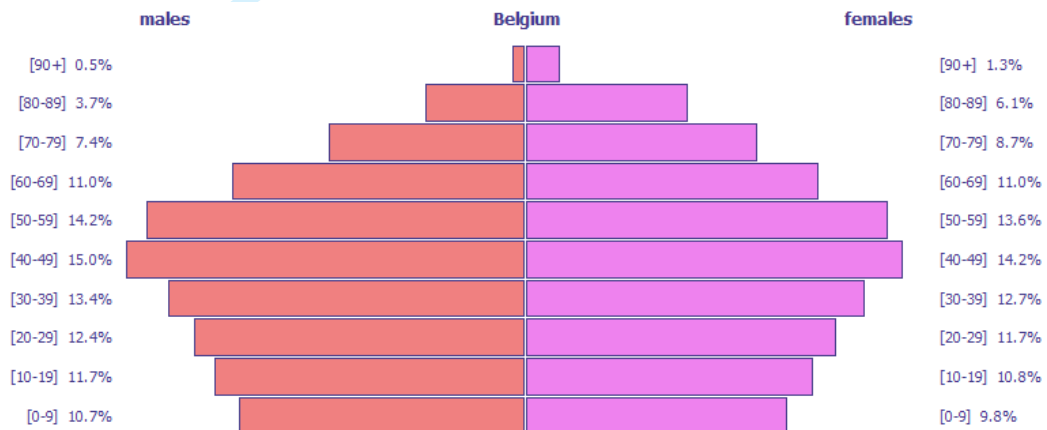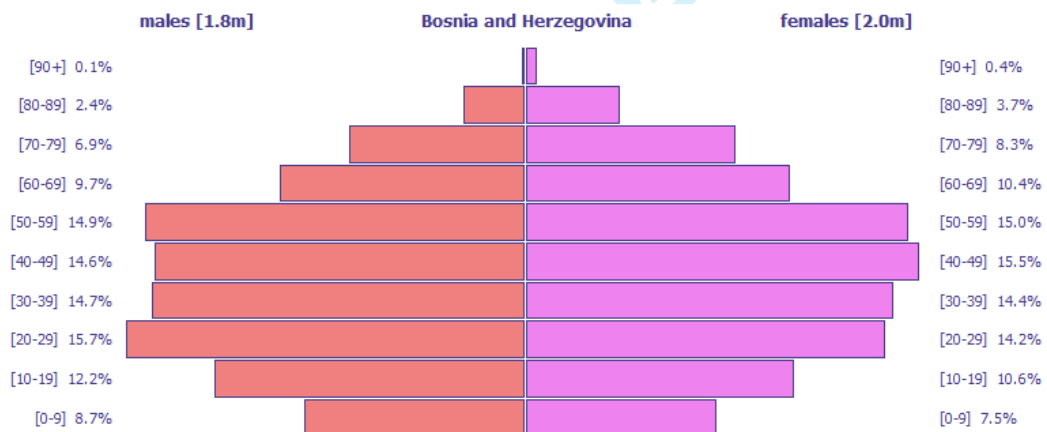

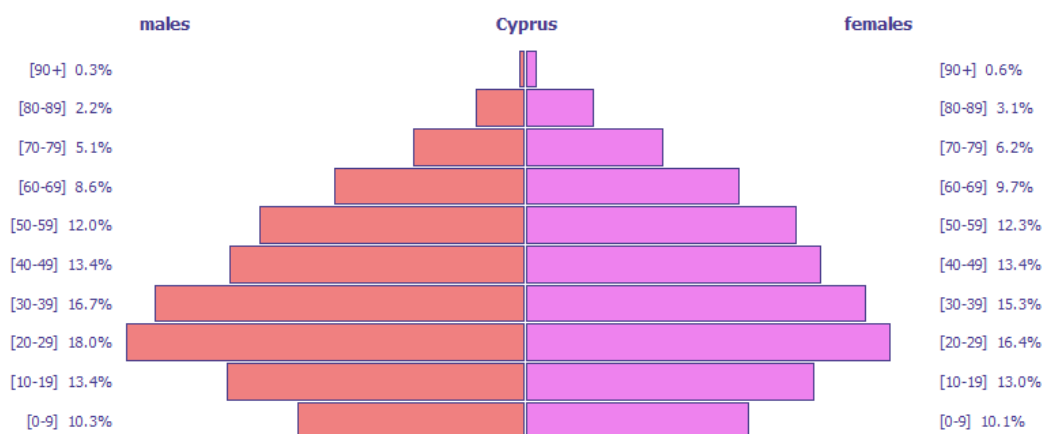

1  
2  
3  
4  
5  
6  
7  
8  
9  
10  
11  
12  
13  
14  
15  
16  
17  
18  
19  
20  
21  
22  
23  
24  
25  
26  
27  
28  
29  
30  
31  
32  
33  
34  
35  
36  
37  
38  
39  
40  
41  
42  
43  
44  
45  
46  
47  
48  
49  
50  
51  
52  
53  
54  
55  
56  
57  
58  
59  
60

1  
2  
3  
4  
5  
6  
7  
8  
9  
10  
11  
12  
13  
14  
15  
16  
17  
18  
19  
20  
21  
22  
23  
24  
25  
26  
27  
28  
29  
30  
31  
32  
33  
34  
35  
36  
37  
38  
39  
40  
41  
42  
43  
44  
45  
46  
47  
48  
49  
50  
51  
52  
53  
54  
55  
56  
57  
58  
59  
60

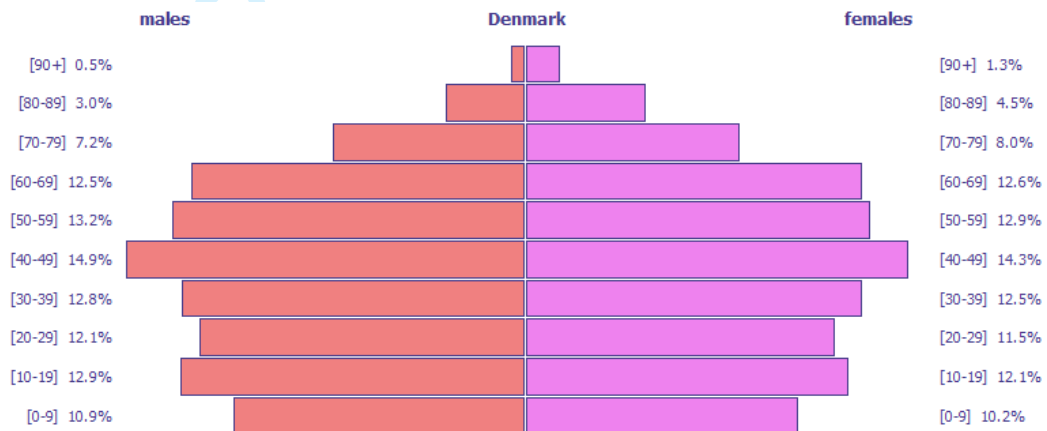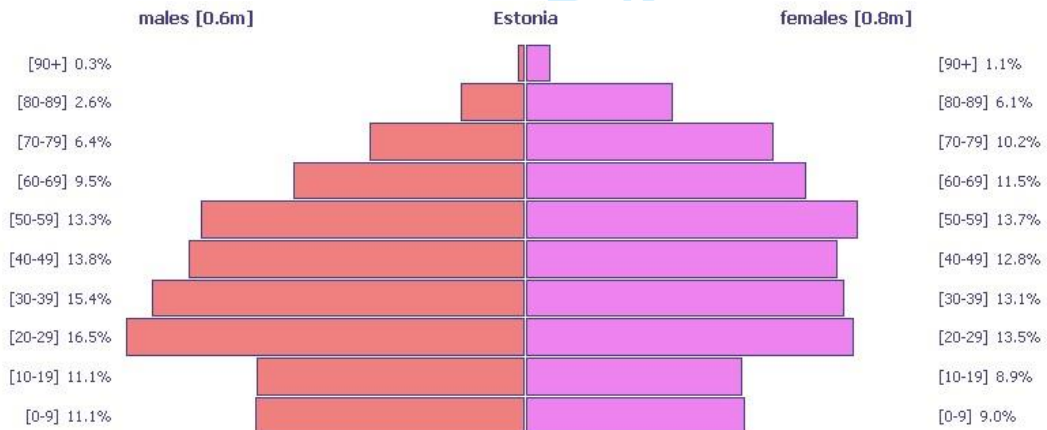

1  
2  
3  
4  
5  
6  
7  
8  
9  
10  
11  
12  
13  
14  
15  
16  
17  
18  
19  
20  
21  
22  
23  
24  
25  
26  
27  
28  
29  
30  
31  
32  
33  
34  
35  
36  
37  
38  
39  
40  
41  
42  
43  
44  
45  
46  
47  
48  
49  
50  
51  
52  
53  
54  
55  
56  
57  
58  
59  
60

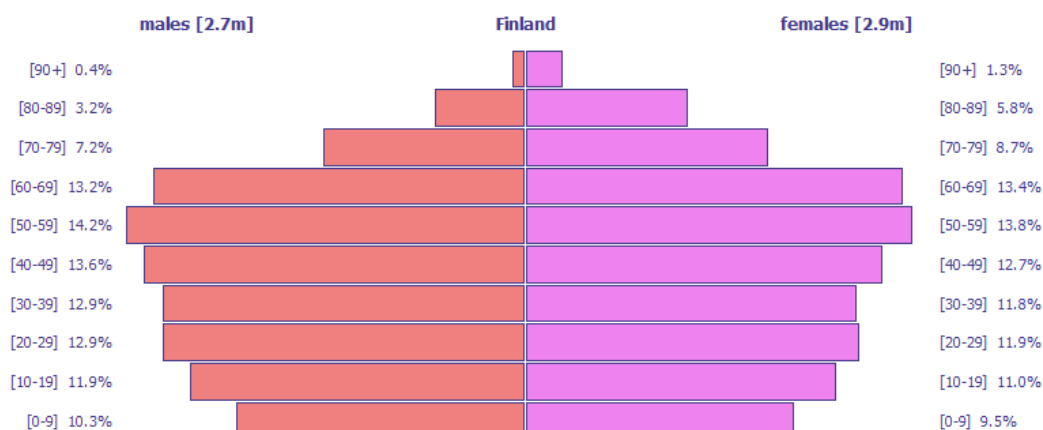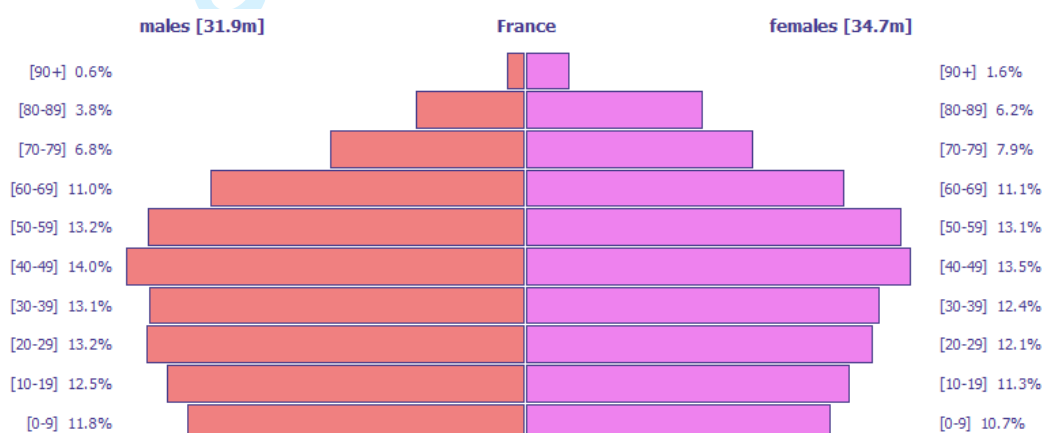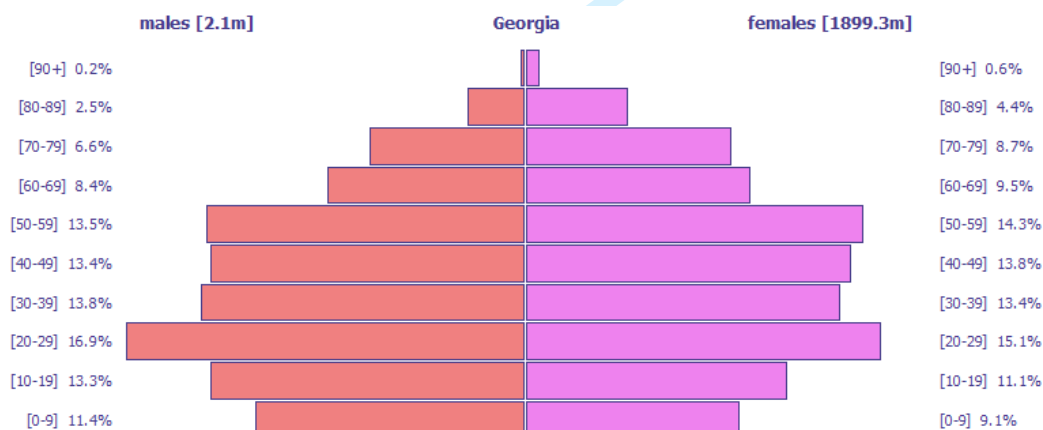



1  
2  
3  
4  
5  
6  
7  
8  
9  
10  
11  
12  
13  
14  
15  
16  
17  
18  
19  
20  
21  
22  
23  
24  
25  
26  
27  
28  
29  
30  
31  
32  
33  
34  
35  
36  
37  
38  
39  
40  
41  
42  
43  
44  
45  
46  
47  
48  
49  
50  
51  
52  
53  
54  
55  
56  
57  
58  
59  
60

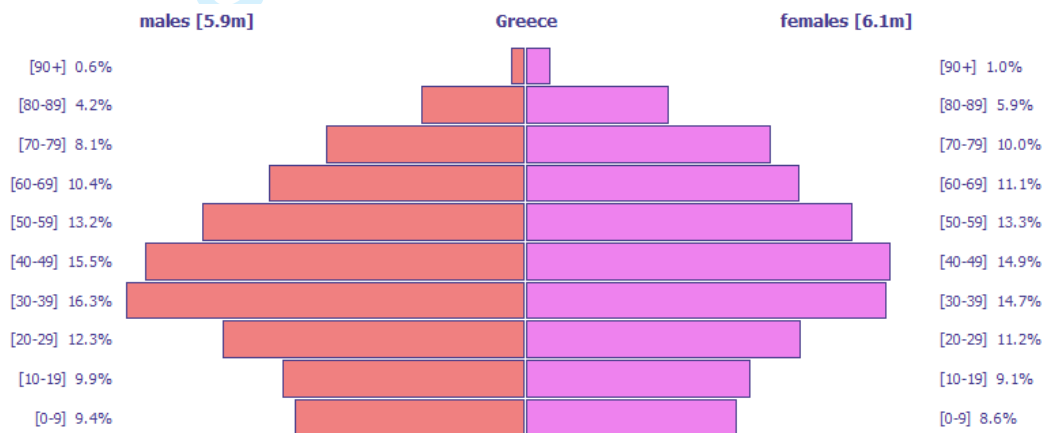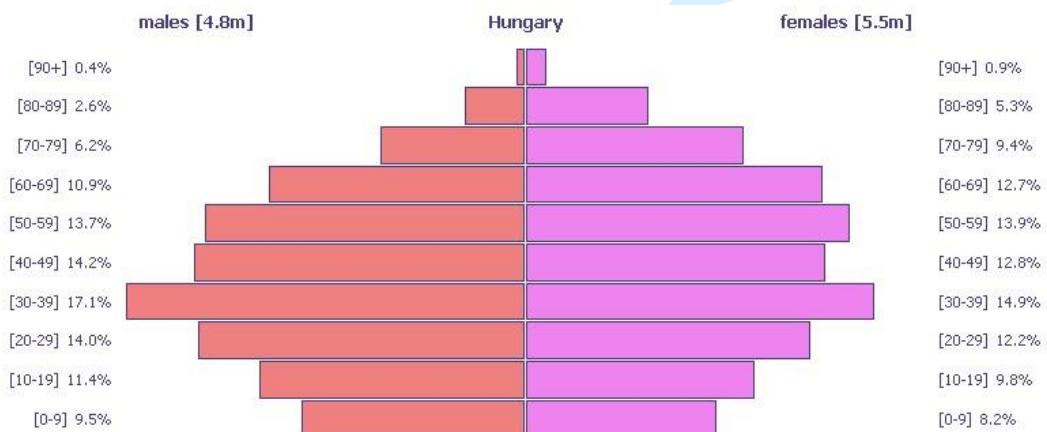

1  
2  
3  
4  
5  
6  
7  
8  
9  
10  
11  
12  
13  
14  
15  
16  
17  
18  
19  
20  
21  
22  
23  
24  
25  
26  
27  
28  
29  
30  
31  
32  
33  
34  
35  
36  
37  
38  
39  
40  
41  
42  
43  
44  
45  
46  
47  
48  
49  
50  
51  
52  
53  
54  
55  
56  
57  
58  
59  
60

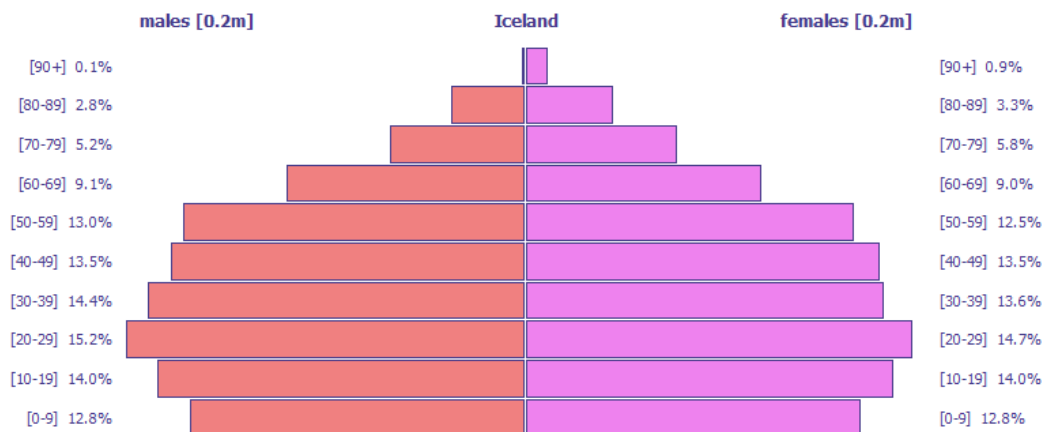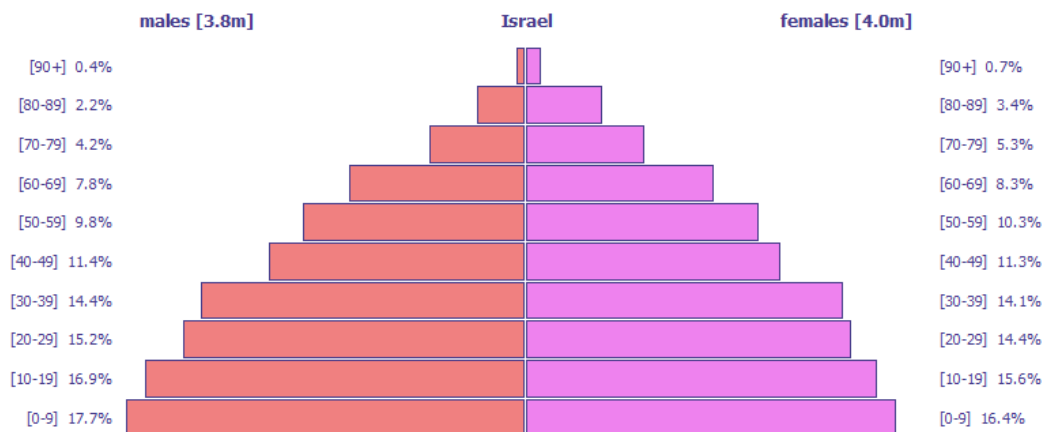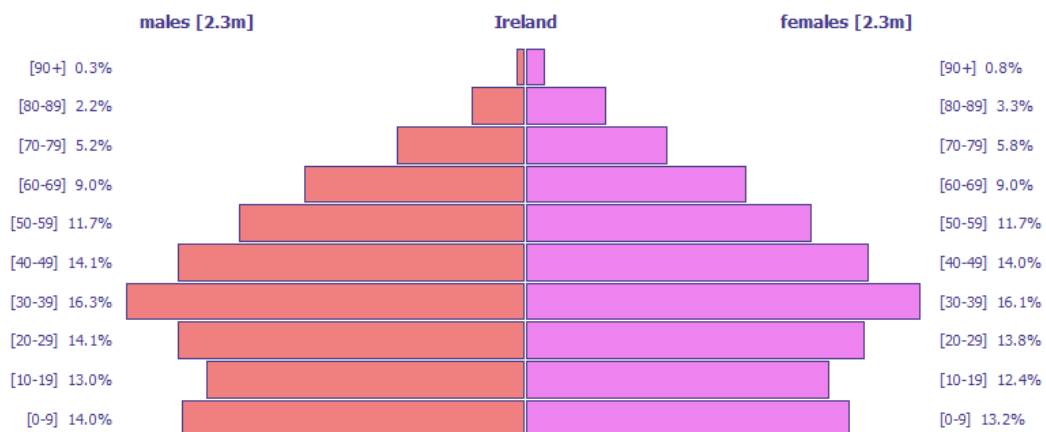

1  
2  
3  
4  
5  
6  
7  
8  
9  
10  
11  
12  
13  
14  
15  
16  
17  
18  
19  
20  
21  
22  
23  
24  
25  
26  
27  
28  
29  
30  
31  
32  
33  
34  
35  
36  
37  
38  
39  
40  
41  
42  
43  
44  
45  
46  
47  
48  
49  
50  
51  
52  
53  
54  
55  
56  
57  
58  
59  
60

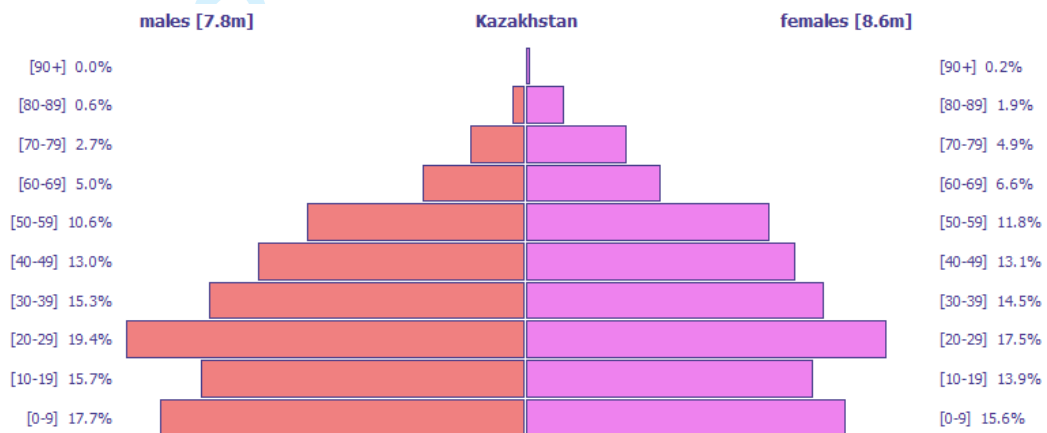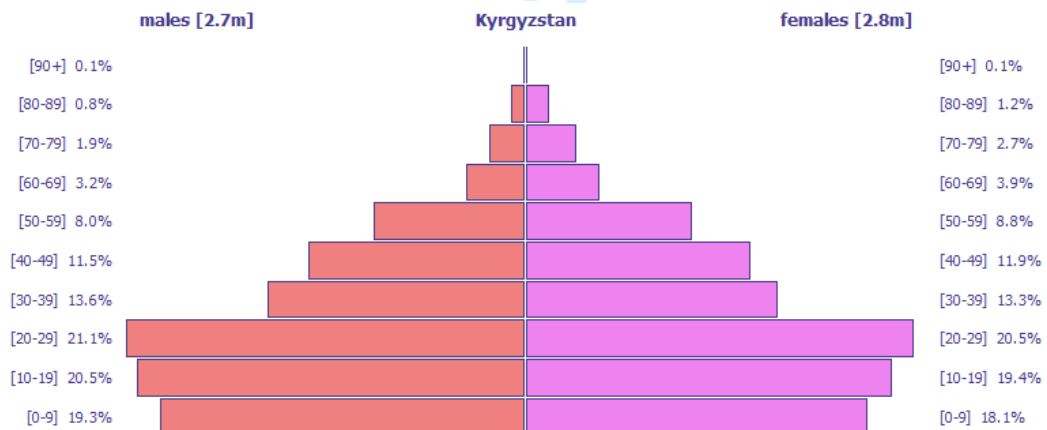

1  
2  
3  
4  
5  
6  
7  
8  
9  
10  
11  
12  
13  
14  
15  
16  
17  
18  
19  
20  
21  
22  
23  
24  
25  
26  
27  
28  
29  
30  
31  
32  
33  
34  
35  
36  
37  
38  
39  
40  
41  
42  
43  
44  
45  
46  
47  
48  
49  
50  
51  
52  
53  
54  
55  
56  
57  
58  
59  
60

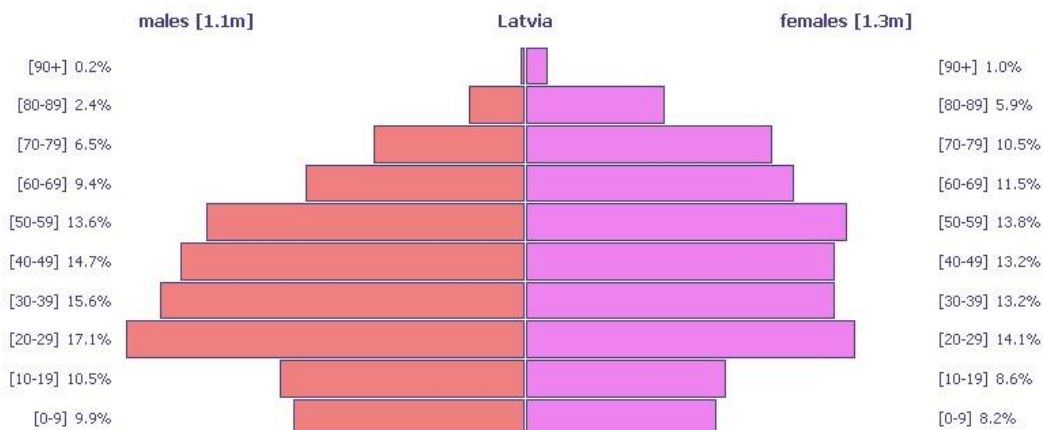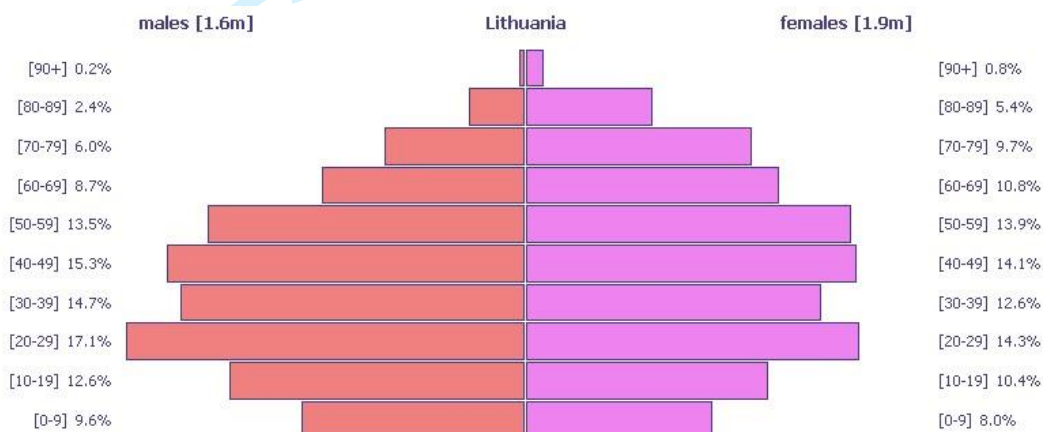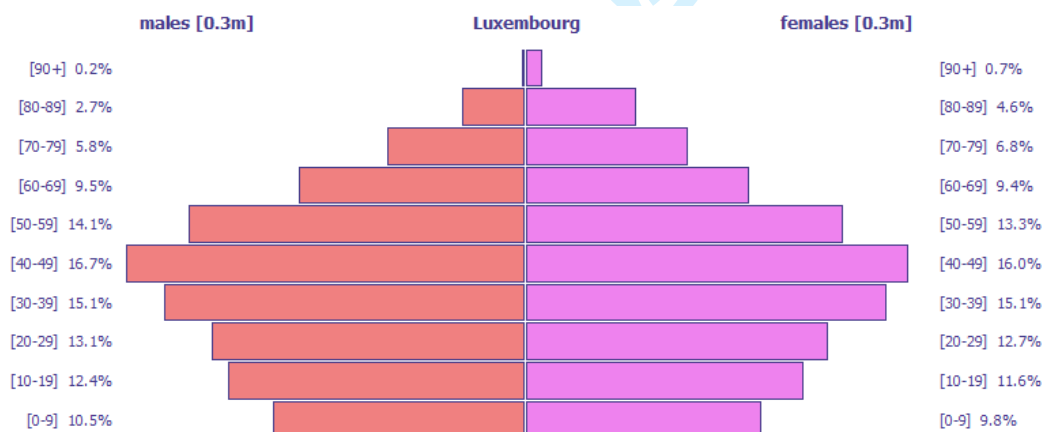

1  
2  
3  
4  
5  
6  
7  
8  
9  
10  
11  
12  
13  
14  
15  
16  
17  
18  
19  
20  
21  
22  
23  
24  
25  
26  
27  
28  
29  
30  
31  
32  
33  
34  
35  
36  
37  
38  
39  
40  
41  
42  
43  
44  
45  
46  
47  
48  
49  
50  
51  
52  
53  
54  
55  
56  
57  
58  
59  
60

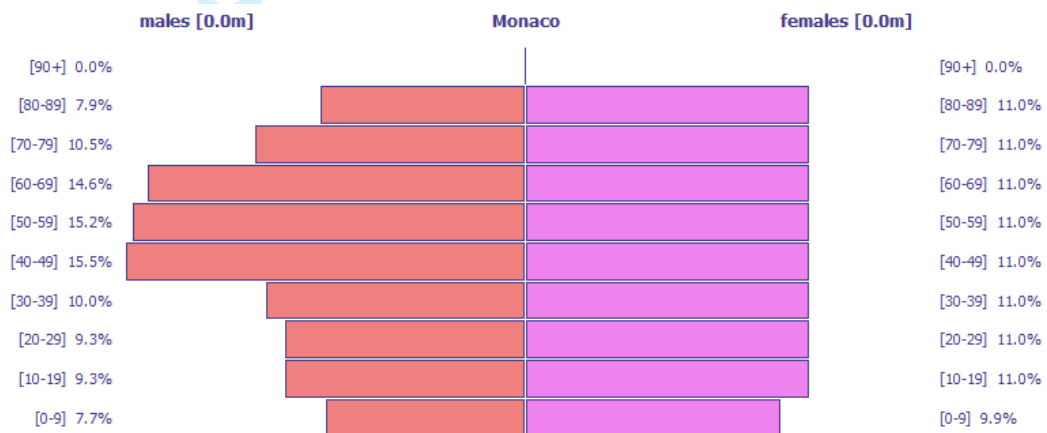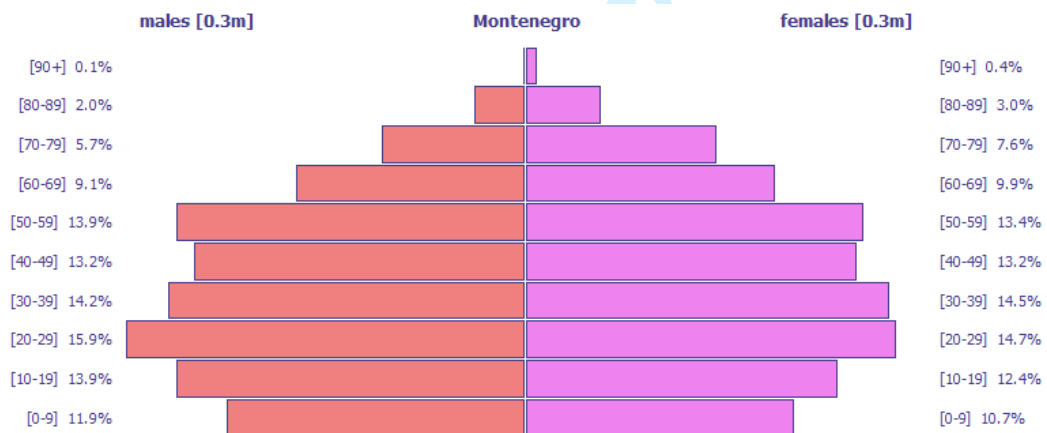

1  
2  
3  
4  
5  
6  
7  
8  
9  
10  
11  
12  
13  
14  
15  
16  
17  
18  
19  
20  
21  
22  
23  
24  
25  
26  
27  
28  
29  
30  
31  
32  
33  
34  
35  
36  
37  
38  
39  
40  
41  
42  
43  
44  
45  
46  
47  
48  
49  
50  
51  
52  
53  
54  
55  
56  
57  
58  
59  
60

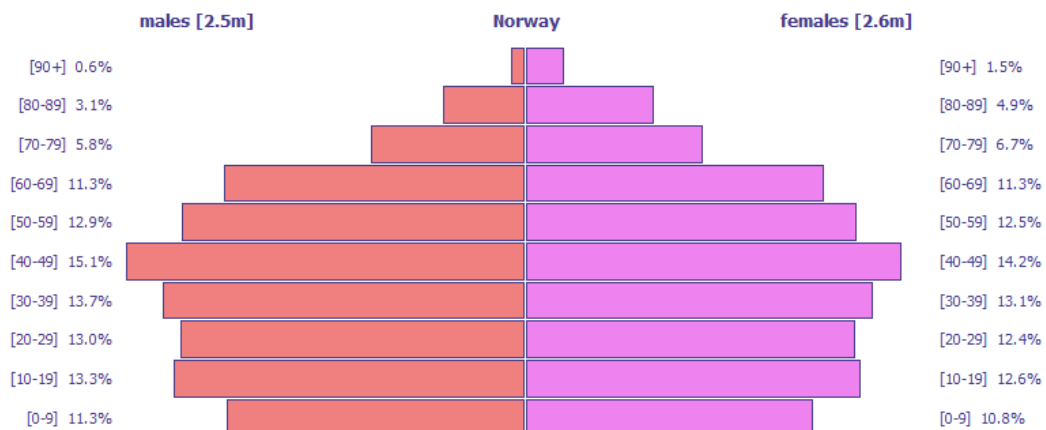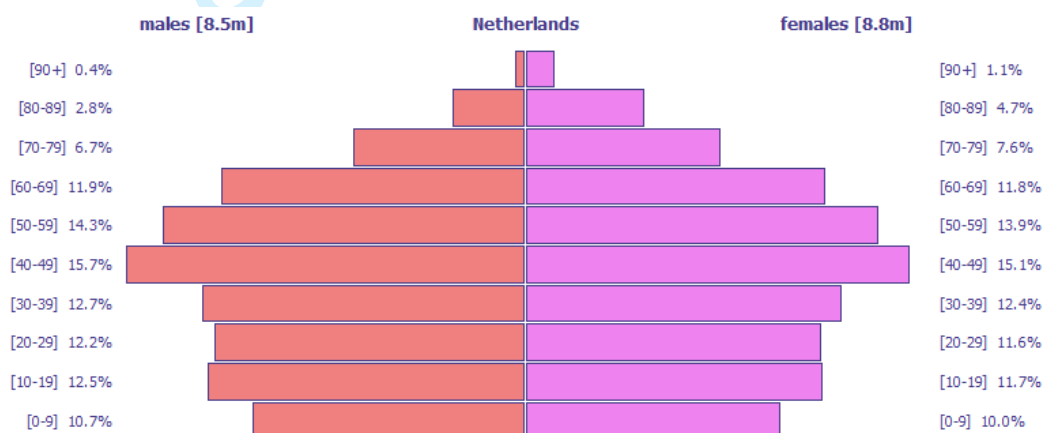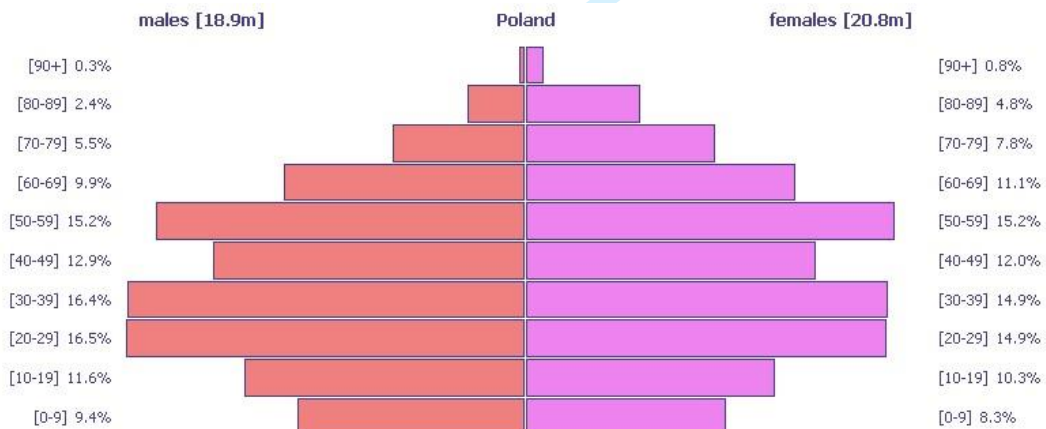

1  
2  
3  
4  
5  
6  
7  
8  
9  
10  
11  
12  
13  
14  
15  
16  
17  
18  
19  
20  
21  
22  
23  
24  
25  
26  
27  
28  
29  
30  
31  
32  
33  
34  
35  
36  
37  
38  
39  
40  
41  
42  
43  
44  
45  
46  
47  
48  
49  
50  
51  
52  
53  
54  
55  
56  
57  
58  
59  
60

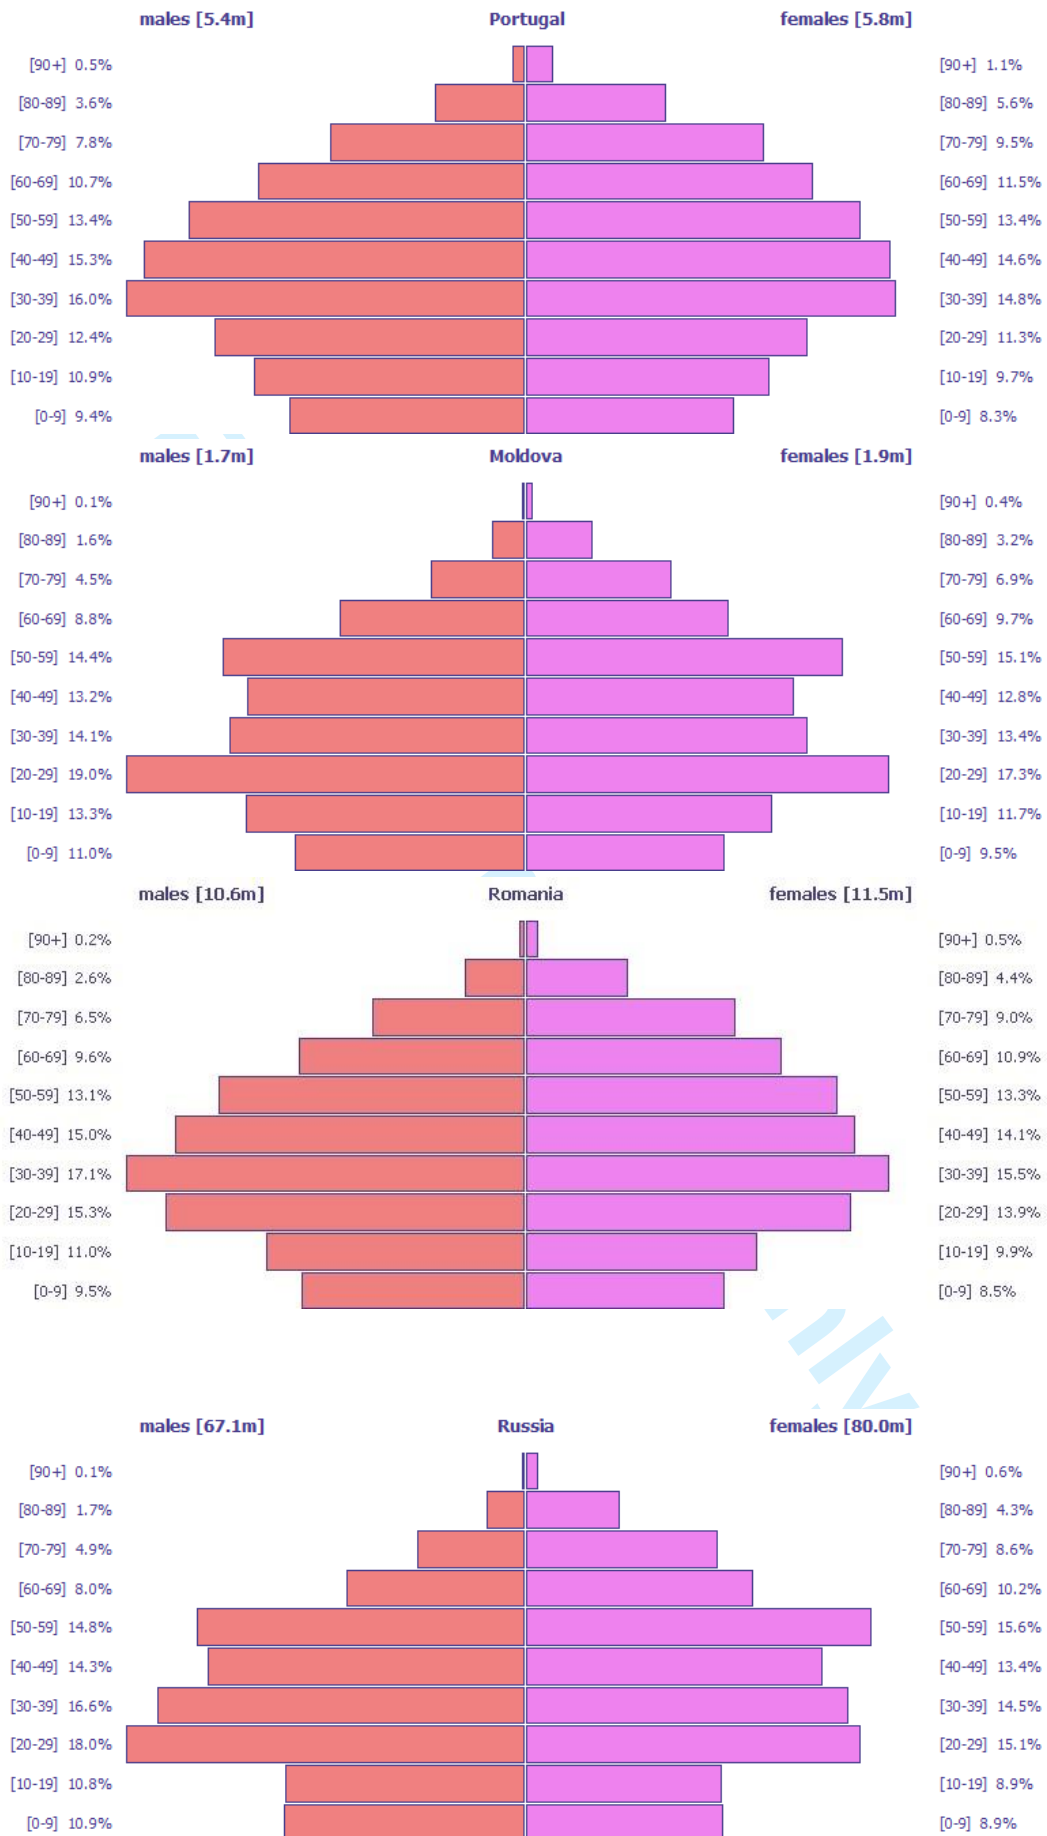

1  
2  
3  
4  
5  
6  
7  
8  
9  
10  
11  
12  
13  
14  
15  
16  
17  
18  
19  
20  
21  
22  
23  
24  
25  
26  
27  
28  
29  
30  
31  
32  
33  
34  
35  
36  
37  
38  
39  
40  
41  
42  
43  
44  
45  
46  
47  
48  
49  
50  
51  
52  
53  
54  
55  
56  
57  
58  
59  
60

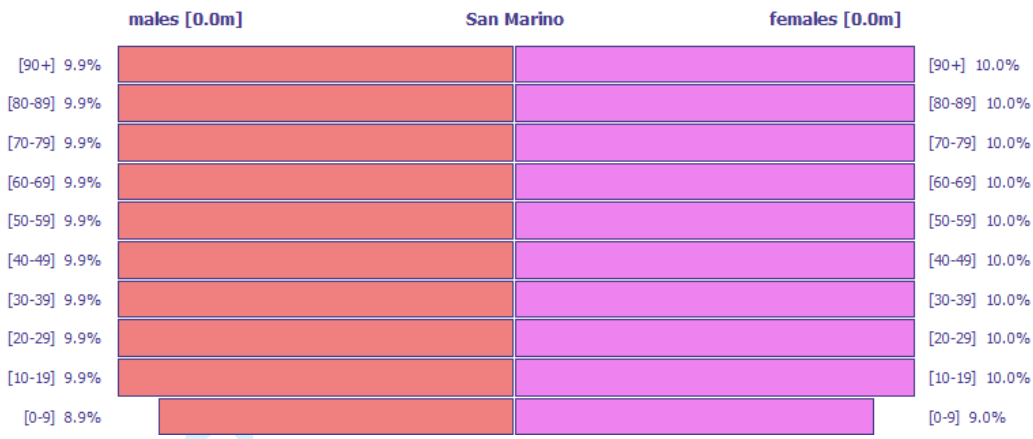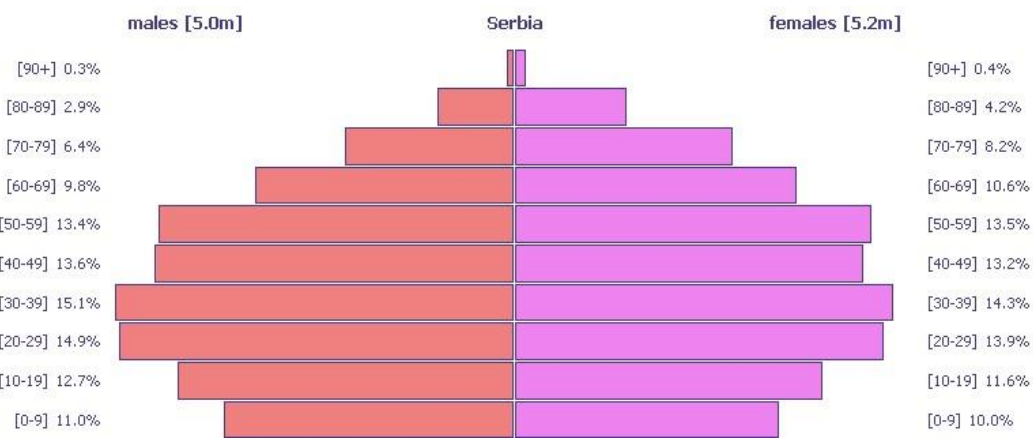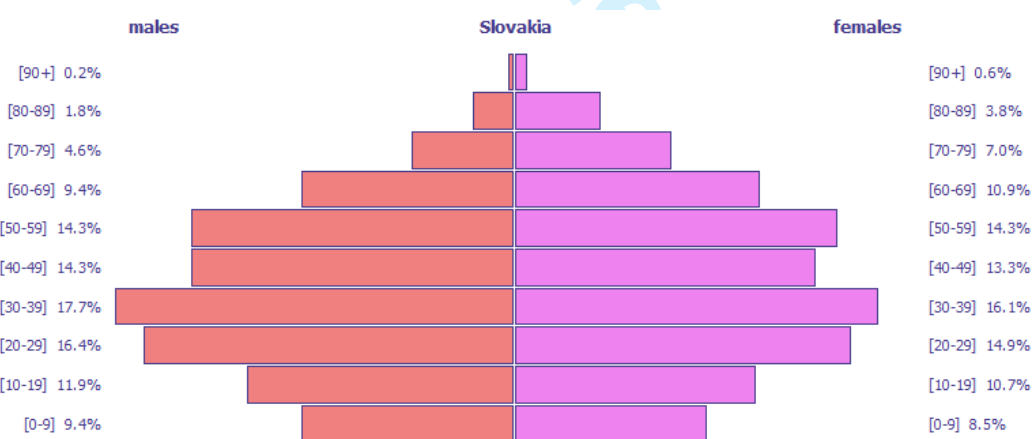



1  
2  
3  
4  
5  
6  
7  
8  
9  
10  
11  
12  
13  
14  
15  
16  
17  
18  
19  
20  
21  
22  
23  
24  
25  
26  
27  
28  
29  
30  
31  
32  
33  
34  
35  
36  
37  
38  
39  
40  
41  
42  
43  
44  
45  
46  
47  
48  
49  
50  
51  
52  
53  
54  
55  
56  
57  
58  
59  
60

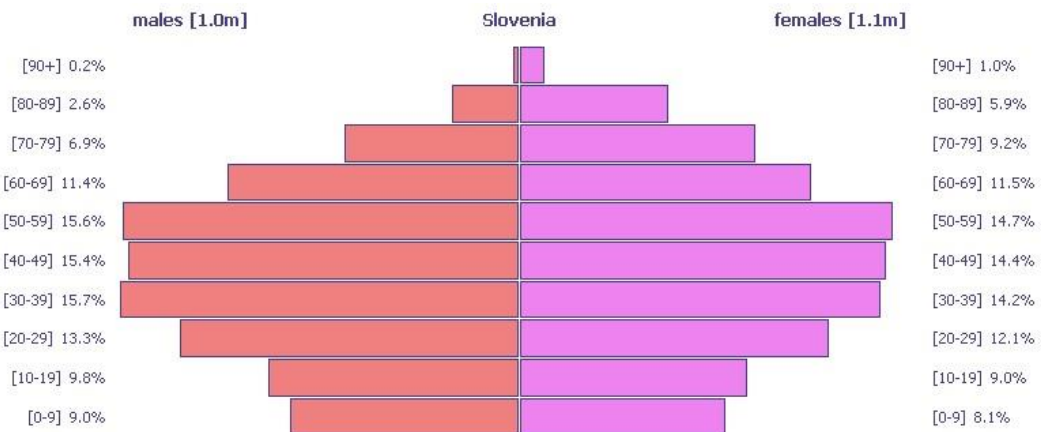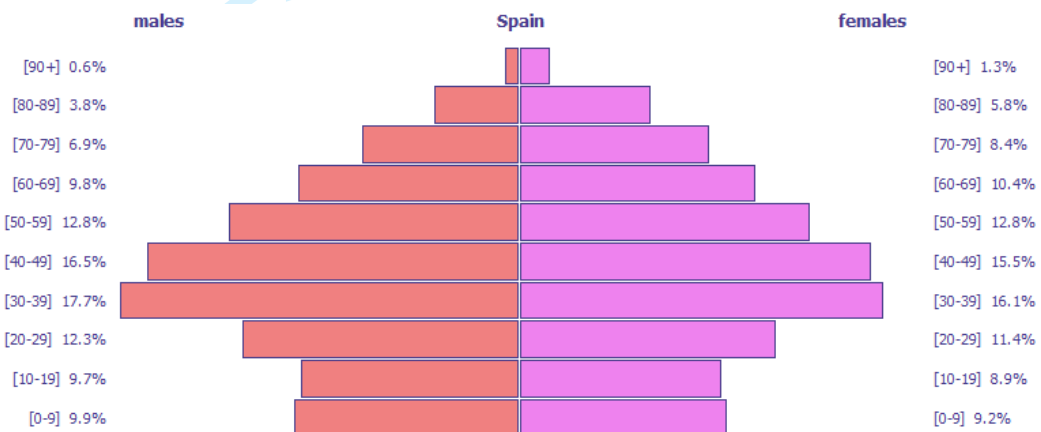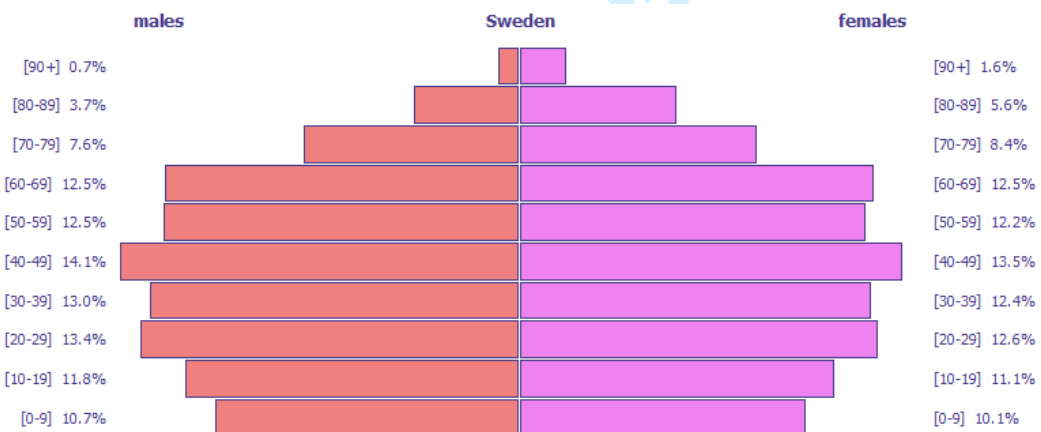

1  
2  
3  
4  
5  
6  
7  
8  
9  
10  
11  
12  
13  
14  
15  
16  
17  
18  
19  
20  
21  
22  
23  
24  
25  
26  
27  
28  
29  
30  
31  
32  
33  
34  
35  
36  
37  
38  
39  
40  
41  
42  
43  
44  
45  
46  
47  
48  
49  
50  
51  
52  
53  
54  
55  
56  
57  
58  
59  
60

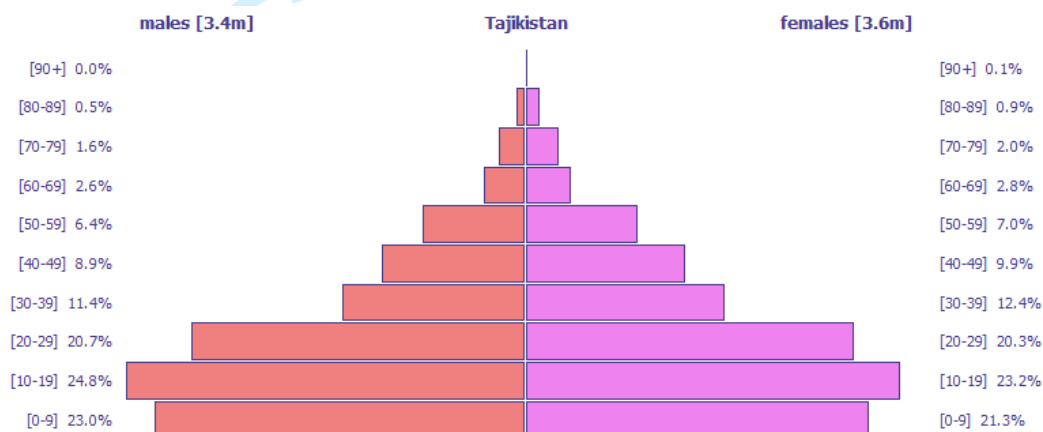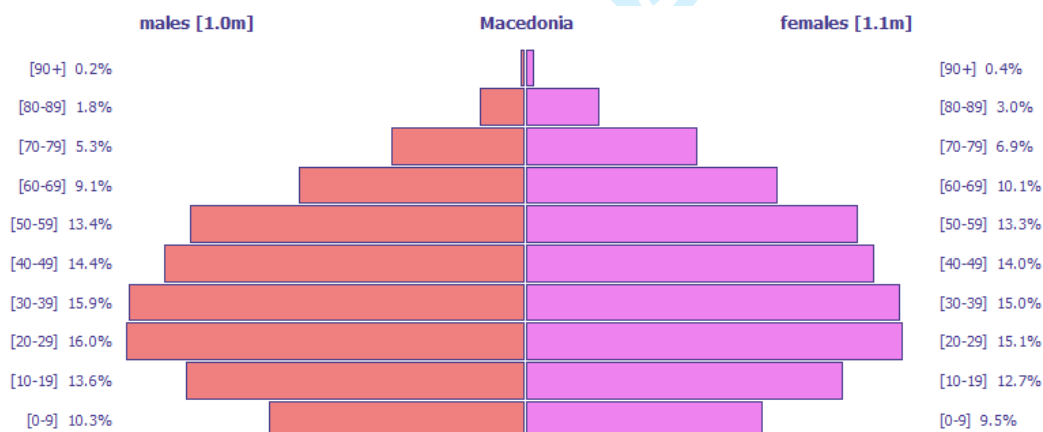

1  
2  
3  
4  
5  
6  
7  
8  
9  
10  
11  
12  
13  
14  
15  
16  
17  
18  
19  
20  
21  
22  
23  
24  
25  
26  
27  
28  
29  
30  
31  
32  
33  
34  
35  
36  
37  
38  
39  
40  
41  
42  
43  
44  
45  
46  
47  
48  
49  
50  
51  
52  
53  
54  
55  
56  
57  
58  
59  
60

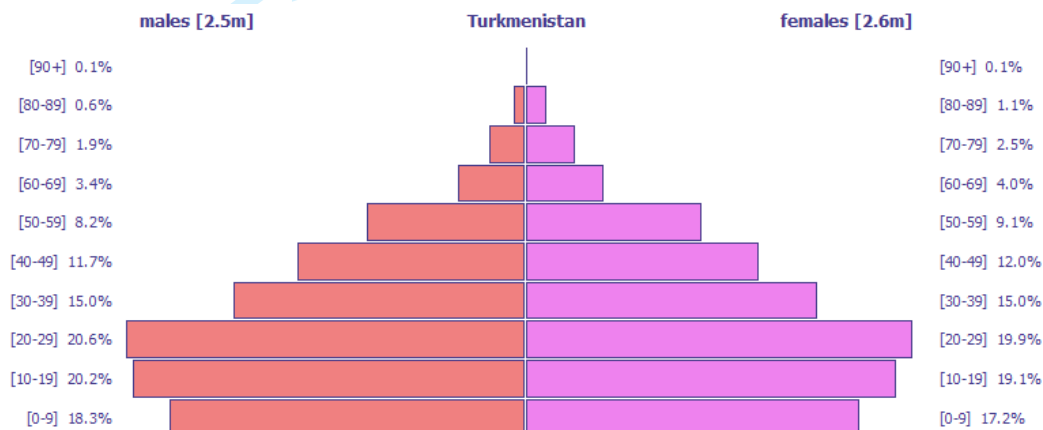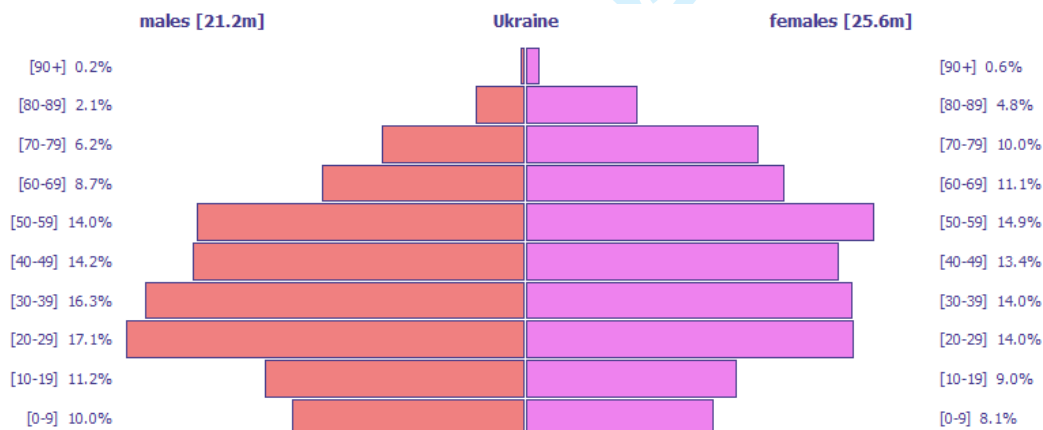

1  
2  
3  
4  
5  
6  
7  
8  
9  
10  
11  
12  
13  
14  
15  
16  
17  
18  
19  
20  
21  
22  
23  
24  
25  
26  
27  
28  
29  
30  
31  
32  
33  
34  
35  
36  
37  
38  
39  
40  
41  
42  
43  
44  
45  
46  
47  
48  
49  
50  
51  
52  
53  
54  
55  
56  
57  
58  
59  
60

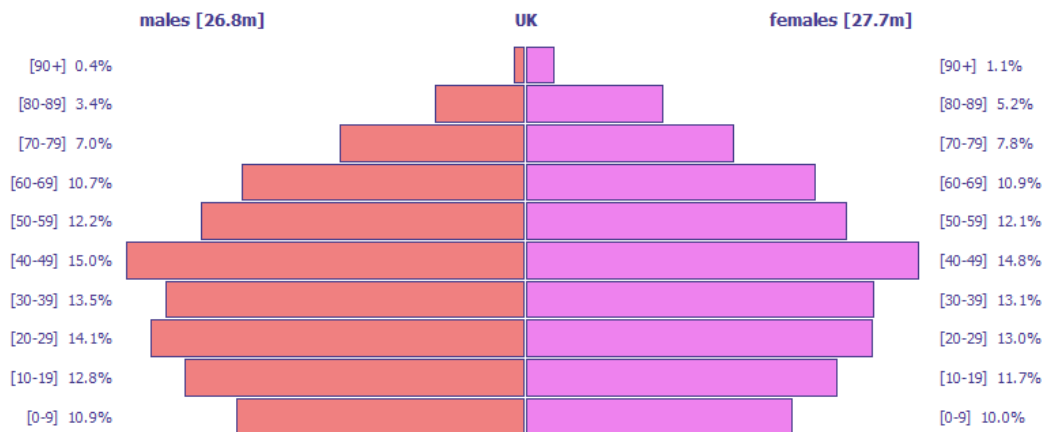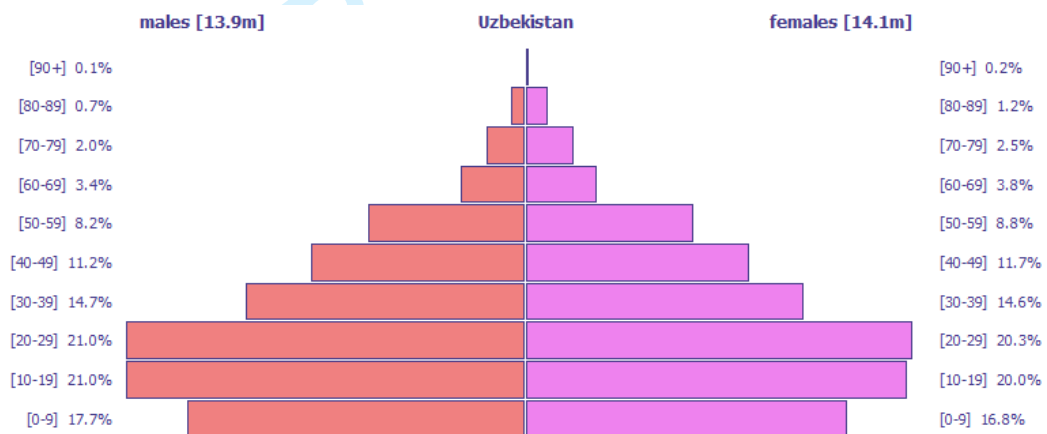

## Appendix 6. Disease tables by country

### Albania

**Table A1. Cumulative incidence cases from year 2010 [per 100000 of population in 2010] for Albania**

| Year       | Cancers    | CHD & Stroke | Osteoarthritis | Diabetes   | Hypertension |
|------------|------------|--------------|----------------|------------|--------------|
| Scenario 0 |            |              |                |            |              |
| 2010       | 113 [±3]   | 524 [±6]     | 13 [±1]        | 113 [±3]   | 1555 [±11]   |
| 2020       | 1178 [±9]  | 5401 [±20]   | 133 [±3]       | 988 [±9]   | 16435 [±35]  |
| 2030       | 2222 [±13] | 10237 [±27]  | 243 [±4]       | 1588 [±11] | 30095 [±47]  |
| Scenario 1 |            |              |                |            |              |
| 2010       | 113 [±3]   | 525 [±6]     | 13 [±1]        | 113 [±3]   | 1555 [±11]   |
| 2020       | 1169 [±9]  | 5379 [±20]   | 135 [±3]       | 960 [±9]   | 16392 [±35]  |
| 2030       | 2208 [±13] | 10193 [±27]  | 244 [±4]       | 1552 [±11] | 30012 [±47]  |
| Scenario 2 |            |              |                |            |              |
| 2010       | 110 [±3]   | 525 [±6]     | 14 [±1]        | 114 [±3]   | 1557 [±11]   |
| 2020       | 1146 [±9]  | 5235 [±20]   | 123 [±3]       | 828 [±8]   | 16136 [±35]  |
| 2030       | 2165 [±13] | 9934 [±27]   | 228 [±4]       | 1343 [±10] | 29680 [±47]  |

**Table A2. Cumulative incidence cases avoided from year 2010 [per 100000 of population in 2010] for Albania**

| Year       | Cancers  | CHD & Stroke | Osteoarthritis | Diabetes  | Hypertension |
|------------|----------|--------------|----------------|-----------|--------------|
| Scenario 1 |          |              |                |           |              |
| 2010       | 0 [±4]   | -1 [±9]      | 0 [±1]         | 0 [±4]    | 0 [±16]      |
| 2020       | 9 [±14]  | 22 [±29]     | -2 [±5]        | 28 [±12]  | 43 [±51]     |
| 2030       | 14 [±19] | 44 [±40]     | -1 [±6]        | 36 [±16]  | 83 [±69]     |
| Scenario 2 |          |              |                |           |              |
| 2010       | 3 [±4]   | -1 [±9]      | -1 [±1]        | -1 [±4]   | -2 [±16]     |
| 2020       | 32 [±14] | 166 [±29]    | 10 [±5]        | 160 [±12] | 299 [±51]    |
| 2030       | 57 [±19] | 303 [±40]    | 15 [±6]        | 245 [±15] | 415 [±69]    |

**Table A3. Prevalence cases in year [per 100000] for Albania**

| Year       | Cancers   | CHD & Stroke | Osteoarthritis | Diabetes   | Hypertension |
|------------|-----------|--------------|----------------|------------|--------------|
| Scenario 0 |           |              |                |            |              |
| 2010       | 829 [±8]  | 1954 [±13]   | 262 [±5]       | 2724 [±15] | 42669 [±58]  |
| 2020       | 965 [±9]  | 2419 [±14]   | 274 [±5]       | 2718 [±14] | 47159 [±60]  |
| 2030       | 1015 [±9] | 2663 [±14]   | 287 [±5]       | 2509 [±14] | 50524 [±61]  |
| Scenario 1 |           |              |                |            |              |
| 2010       | 840 [±8]  | 1953 [±12]   | 261 [±5]       | 2727 [±15] | 42639 [±58]  |
| 2020       | 960 [±9]  | 2410 [±14]   | 276 [±5]       | 2693 [±14] | 47089 [±60]  |
| 2030       | 1011 [±9] | 2651 [±14]   | 287 [±5]       | 2481 [±13] | 50428 [±61]  |
| Scenario 2 |           |              |                |            |              |
| 2010       | 833 [±8]  | 1960 [±13]   | 263 [±5]       | 2723 [±15] | 42661 [±58]  |
| 2020       | 944 [±8]  | 2357 [±13]   | 266 [±4]       | 2575 [±14] | 46904 [±60]  |
| 2030       | 997 [±9]  | 2586 [±14]   | 277 [±4]       | 2320 [±13] | 50222 [±61]  |

**Table A4. Prevalence cases avoided in year [per 100000] for Albania**

| Year       | Cancers   | CHD & Stroke | Osteoarthritis | Diabetes  | Hypertension |
|------------|-----------|--------------|----------------|-----------|--------------|
| Scenario 1 |           |              |                |           |              |
| 2010       | -11 [±12] | 1 [±18]      | 1 [±6]         | -3 [±21]  | 30 [±83]     |
| 2020       | 5 [±12]   | 9 [±20]      | -2 [±7]        | 25 [±21]  | 70 [±87]     |
| 2030       | 4 [±13]   | 12 [±21]     | 0 [±7]         | 28 [±20]  | 96 [±90]     |
| Scenario 2 |           |              |                |           |              |
| 2010       | -4 [±12]  | -6 [±18]     | -1 [±6]        | 1 [±21]   | 8 [±83]      |
| 2020       | 21 [±12]  | 62 [±20]     | 8 [±7]         | 143 [±21] | 255 [±87]    |
| 2030       | 18 [±13]  | 77 [±20]     | 10 [±7]        | 189 [±20] | 302 [±90]    |

## Andorra

**Table A5. Cumulative incidence cases from year 2010 [per 100000 of population in 2010] for Andorra**

| Year       | Cancers    | CHD & Stroke | Osteoarthritis | Diabetes   | Hypertension |
|------------|------------|--------------|----------------|------------|--------------|
| Scenario 0 |            |              |                |            |              |
| 2010       | 174 [±4]   | 897 [±8]     | 15 [±1]        | 218 [±4]   | 575 [±7]     |
| 2020       | 2068 [±13] | 7668 [±25]   | 184 [±4]       | 2573 [±15] | 7148 [±25]   |
| 2030       | 4426 [±20] | 15278 [±37]  | 384 [±6]       | 5328 [±22] | 14869 [±36]  |
| Scenario 1 |            |              |                |            |              |
| 2010       | 169 [±4]   | 897 [±8]     | 14 [±1]        | 218 [±4]   | 581 [±7]     |
| 2020       | 2043 [±13] | 7551 [±25]   | 179 [±4]       | 2435 [±14] | 6994 [±24]   |
| 2030       | 4358 [±20] | 14994 [±37]  | 372 [±6]       | 5022 [±21] | 14493 [±36]  |
| Scenario 2 |            |              |                |            |              |
| 2010       | 169 [±4]   | 896 [±8]     | 16 [±1]        | 216 [±4]   | 580 [±7]     |
| 2020       | 1970 [±13] | 7178 [±25]   | 168 [±4]       | 2003 [±13] | 6464 [±23]   |
| 2030       | 4188 [±19] | 14180 [±35]  | 349 [±6]       | 4138 [±19] | 13324 [±34]  |

**Table A6. Cumulative incidence cases avoided from year 2010 [per 100000 of population in 2010] for Andorra**

| Year       | Cancers   | CHD & Stroke | Osteoarthritis | Diabetes   | Hypertension |
|------------|-----------|--------------|----------------|------------|--------------|
| Scenario 1 |           |              |                |            |              |
| 2010       | 5 [±5]    | 0 [±12]      | 1 [±2]         | 0 [±6]     | -6 [±10]     |
| 2020       | 25 [±18]  | 117 [±35]    | 5 [±5]         | 138 [±20]  | 154 [±34]    |
| 2030       | 68 [±27]  | 284 [±49]    | 12 [±8]        | 306 [±29]  | 376 [±48]    |
| Scenario 2 |           |              |                |            |              |
| 2010       | 5 [±5]    | 1 [±12]      | -1 [±2]        | 2 [±6]     | -5 [±10]     |
| 2020       | 98 [±18]  | 490 [±34]    | 16 [±5]        | 570 [±19]  | 684 [±33]    |
| 2030       | 238 [±26] | 1098 [±49]   | 35 [±8]        | 1190 [±28] | 1545 [±47]   |

**Table A7. Prevalence cases in year [per 100000] for Andorra**

| Year       | Cancers    | CHD & Stroke | Osteoarthritis | Diabetes   | Hypertension |
|------------|------------|--------------|----------------|------------|--------------|
| Scenario 0 |            |              |                |            |              |
| 2010       | 1587 [±11] | 2299 [±14]   | 403 [±6]       | 4303 [±19] | 13720 [±33]  |
| 2020       | 1888 [±13] | 2441 [±14]   | 396 [±6]       | 4183 [±19] | 14817 [±35]  |
| 2030       | 2278 [±14] | 3145 [±17]   | 473 [±6]       | 4857 [±21] | 17775 [±40]  |
| Scenario 1 |            |              |                |            |              |
| 2010       | 1589 [±11] | 2300 [±14]   | 402 [±6]       | 4311 [±19] | 13724 [±33]  |
| 2020       | 1876 [±13] | 2420 [±14]   | 390 [±6]       | 4088 [±19] | 14683 [±35]  |
| 2030       | 2248 [±14] | 3085 [±17]   | 463 [±6]       | 4666 [±20] | 17498 [±39]  |
| Scenario 2 |            |              |                |            |              |
| 2010       | 1579 [±11] | 2300 [±14]   | 405 [±6]       | 4304 [±19] | 13720 [±33]  |
| 2020       | 1837 [±12] | 2316 [±14]   | 384 [±6]       | 3763 [±18] | 14282 [±35]  |
| 2030       | 2198 [±14] | 2939 [±16]   | 450 [±6]       | 4111 [±19] | 16696 [±38]  |

**Table A8. Prevalence cases avoided in year [per 100000] for Andorra**

| Year       | Cancers  | CHD & Stroke | Osteoarthritis | Diabetes  | Hypertension |
|------------|----------|--------------|----------------|-----------|--------------|
| Scenario 1 |          |              |                |           |              |
| 2010       | -2 [±16] | -1 [±19]     | 1 [±8]         | -8 [±26]  | -4 [±47]     |
| 2020       | 12 [±17] | 21 [±20]     | 6 [±8]         | 95 [±26]  | 134 [±49]    |
| 2030       | 30 [±19] | 60 [±22]     | 10 [±9]        | 191 [±28] | 277 [±53]    |
| Scenario 2 |          |              |                |           |              |
| 2010       | 8 [±16]  | -1 [±19]     | -2 [±8]        | -1 [±26]  | 0 [±47]      |
| 2020       | 51 [±17] | 125 [±20]    | 12 [±8]        | 420 [±25] | 535 [±48]    |
| 2030       | 80 [±19] | 206 [±22]    | 23 [±9]        | 746 [±27] | 1079 [±53]   |



## Austria

**Table A9. Cumulative incidence cases from year 2010 [per 100000 of population in 2010] for Austria**

| Year       | Cancers           | CHD & Stroke       | Osteoarthritis  | Diabetes          | Hypertension       |
|------------|-------------------|--------------------|-----------------|-------------------|--------------------|
| Scenario 0 |                   |                    |                 |                   |                    |
| 2010       | 183 [ $\pm 4$ ]   | 3033 [ $\pm 16$ ]  | 17 [ $\pm 1$ ]  | 224 [ $\pm 4$ ]   | 504 [ $\pm 6$ ]    |
| 2020       | 2086 [ $\pm 14$ ] | 24761 [ $\pm 47$ ] | 206 [ $\pm 4$ ] | 2678 [ $\pm 15$ ] | 6254 [ $\pm 24$ ]  |
| 2030       | 4278 [ $\pm 21$ ] | 47804 [ $\pm 69$ ] | 426 [ $\pm 6$ ] | 5662 [ $\pm 24$ ] | 12793 [ $\pm 35$ ] |
| Scenario 1 |                   |                    |                 |                   |                    |
| 2010       | 182 [ $\pm 4$ ]   | 3033 [ $\pm 16$ ]  | 17 [ $\pm 1$ ]  | 225 [ $\pm 4$ ]   | 506 [ $\pm 6$ ]    |
| 2020       | 2046 [ $\pm 13$ ] | 24249 [ $\pm 46$ ] | 195 [ $\pm 4$ ] | 2480 [ $\pm 15$ ] | 6000 [ $\pm 23$ ]  |
| 2030       | 4199 [ $\pm 20$ ] | 46736 [ $\pm 68$ ] | 411 [ $\pm 6$ ] | 5229 [ $\pm 23$ ] | 12247 [ $\pm 35$ ] |
| Scenario 2 |                   |                    |                 |                   |                    |
| 2010       | 185 [ $\pm 4$ ]   | 3023 [ $\pm 16$ ]  | 17 [ $\pm 1$ ]  | 221 [ $\pm 4$ ]   | 500 [ $\pm 6$ ]    |
| 2020       | 2002 [ $\pm 13$ ] | 23303 [ $\pm 45$ ] | 183 [ $\pm 4$ ] | 2089 [ $\pm 14$ ] | 5566 [ $\pm 22$ ]  |
| 2030       | 4108 [ $\pm 20$ ] | 44991 [ $\pm 66$ ] | 387 [ $\pm 6$ ] | 4454 [ $\pm 21$ ] | 11286 [ $\pm 33$ ] |

**Table A10. Cumulative incidence cases avoided from year 2010 [per 100000 of population in 2010] Austria**

| Year       | Cancers          | CHD & Stroke      | Osteoarthritis | Diabetes          | Hypertension      |
|------------|------------------|-------------------|----------------|-------------------|-------------------|
| Scenario 1 |                  |                   |                |                   |                   |
| 2010       | 1 [ $\pm 5$ ]    | 0 [ $\pm 22$ ]    | 0 [ $\pm 2$ ]  | 0 [ $\pm 6$ ]     | 0 [ $\pm 9$ ]     |
| 2020       | 40 [ $\pm 18$ ]  | 512 [ $\pm 63$ ]  | 11 [ $\pm 6$ ] | 198 [ $\pm 20$ ]  | 254 [ $\pm 31$ ]  |
| 2030       | 79 [ $\pm 26$ ]  | 1068 [ $\pm 87$ ] | 15 [ $\pm 8$ ] | 433 [ $\pm 30$ ]  | 546 [ $\pm 45$ ]  |
| Scenario 2 |                  |                   |                |                   |                   |
| 2010       | -2 [ $\pm 5$ ]   | 10 [ $\pm 22$ ]   | 0 [ $\pm 2$ ]  | 3 [ $\pm 6$ ]     | 4 [ $\pm 9$ ]     |
| 2020       | 84 [ $\pm 18$ ]  | 1458 [ $\pm 62$ ] | 23 [ $\pm 6$ ] | 589 [ $\pm 20$ ]  | 688 [ $\pm 31$ ]  |
| 2030       | 170 [ $\pm 26$ ] | 2813 [ $\pm 86$ ] | 39 [ $\pm 8$ ] | 1208 [ $\pm 28$ ] | 1507 [ $\pm 44$ ] |

**Table A11. Prevalence cases in year [per 100000] for Austria**

| Year       | Cancers    | CHD & Stroke | Osteoarthritis | Diabetes   | Hypertension |
|------------|------------|--------------|----------------|------------|--------------|
| Scenario 0 |            |              |                |            |              |
| 2010       | 1559 [±11] | 4763 [±20]   | 414 [±6]       | 3457 [±17] | 13069 [±32]  |
| 2020       | 1683 [±12] | 4721 [±20]   | 408 [±6]       | 2522 [±15] | 13030 [±34]  |
| 2030       | 1801 [±13] | 4841 [±22]   | 438 [±7]       | 2703 [±16] | 13610 [±37]  |
| Scenario 1 |            |              |                |            |              |
| 2010       | 1557 [±11] | 4757 [±20]   | 412 [±6]       | 3467 [±17] | 13048 [±32]  |
| 2020       | 1670 [±12] | 4622 [±20]   | 399 [±6]       | 2425 [±15] | 12857 [±34]  |
| 2030       | 1796 [±13] | 4777 [±22]   | 430 [±6]       | 2554 [±16] | 13352 [±36]  |
| Scenario 2 |            |              |                |            |              |
| 2010       | 1561 [±11] | 4757 [±20]   | 409 [±6]       | 3459 [±17] | 13016 [±32]  |
| 2020       | 1664 [±12] | 4503 [±20]   | 393 [±6]       | 2250 [±14] | 12643 [±33]  |
| 2030       | 1782 [±13] | 4639 [±21]   | 421 [±6]       | 2314 [±15] | 12903 [±35]  |

**Table A12. Prevalence cases avoided in year [per 100000] Austria**

| Year       | Cancers  | CHD & Stroke | Osteoarthritis | Diabetes  | Hypertension |
|------------|----------|--------------|----------------|-----------|--------------|
| Scenario 1 |          |              |                |           |              |
| 2010       | 2 [±16]  | 6 [±28]      | 2 [±8]         | 0 [±24]   | 21 [±46]     |
| 2020       | 13 [±16] | 99 [±27]     | 9 [±8]         | 97 [±20]  | 173 [±46]    |
| 2030       | 5 [±17]  | 64 [±28]     | 8 [±8]         | 149 [±21] | 258 [±46]    |
| Scenario 2 |          |              |                |           |              |
| 2010       | 0 [±16]  | 6 [±28]      | 5 [±8]         | 0 [±24]   | 53 [±46]     |
| 2020       | 19 [±16] | 218 [±27]    | 15 [±8]        | 272 [±20] | 387 [±45]    |
| 2030       | 19 [±17] | 202 [±28]    | 17 [±8]        | 389 [±20] | 707 [±46]    |

## Armenia

**Table A13. Cumulative incidence cases from year 2010 [per 100000 of population in 2010] for Armenia**

| Year       | Cancers    | CHD & Stroke | Osteoarthritis | Diabetes   | Hypertension |
|------------|------------|--------------|----------------|------------|--------------|
| Scenario 0 |            |              |                |            |              |
| 2010       | 115 [±3]   | 888 [±8]     | 15 [±1]        | 247 [±4]   | 641 [±7]     |
| 2020       | 1266 [±10] | 8079 [±25]   | 162 [±4]       | 2573 [±14] | 6866 [±23]   |
| 2030       | 2522 [±14] | 15084 [±34]  | 316 [±5]       | 4771 [±19] | 14350 [±34]  |
| Scenario 1 |            |              |                |            |              |
| 2010       | 115 [±3]   | 888 [±8]     | 16 [±1]        | 248 [±4]   | 638 [±7]     |
| 2020       | 1256 [±10] | 7961 [±25]   | 159 [±4]       | 2419 [±14] | 6739 [±23]   |
| 2030       | 2496 [±14] | 14847 [±34]  | 309 [±5]       | 4490 [±19] | 14022 [±33]  |
| Scenario 2 |            |              |                |            |              |
| 2010       | 116 [±3]   | 885 [±8]     | 14 [±1]        | 247 [±4]   | 639 [±7]     |
| 2020       | 1225 [±10] | 7595 [±24]   | 147 [±3]       | 2069 [±13] | 6461 [±23]   |
| 2030       | 2435 [±14] | 14233 [±33]  | 295 [±5]       | 3817 [±17] | 13408 [±32]  |

**Table A14. Cumulative incidence cases avoided from year 2010 [per 100000 of population in 2010] for Armenia**

| Year       | Cancers  | CHD & Stroke | Osteoarthritis | Diabetes  | Hypertension |
|------------|----------|--------------|----------------|-----------|--------------|
| Scenario 1 |          |              |                |           |              |
| 2010       | 0 [±4]   | 0 [±12]      | -1 [±2]        | -1 [±6]   | 3 [±10]      |
| 2020       | 10 [±14] | 118 [±36]    | 3 [±5]         | 154 [±20] | 127 [±33]    |
| 2030       | 26 [±20] | 237 [±49]    | 7 [±7]         | 281 [±27] | 328 [±48]    |
| Scenario 2 |          |              |                |           |              |
| 2010       | -1 [±4]  | 3 [±12]      | 1 [±2]         | 0 [±6]    | 2 [±10]      |
| 2020       | 41 [±14] | 484 [±35]    | 15 [±5]        | 504 [±19] | 405 [±33]    |
| 2030       | 87 [±20] | 851 [±48]    | 21 [±7]        | 954 [±26] | 942 [±47]    |

**Table A15. Prevalence cases in year [per 100000] for Armenia**

| Year       | Cancers   | CHD & Stroke | Osteoarthritis | Diabetes   | Hypertension |
|------------|-----------|--------------|----------------|------------|--------------|
| Scenario 0 |           |              |                |            |              |
| 2010       | 855 [±8]  | 1423 [±11]   | 316 [±5]       | 5933 [±22] | 26724 [±46]  |
| 2020       | 952 [±9]  | 1816 [±12]   | 301 [±5]       | 5456 [±21] | 26337 [±46]  |
| 2030       | 1046 [±9] | 1887 [±12]   | 328 [±5]       | 5542 [±21] | 28023 [±47]  |
| Scenario 1 |           |              |                |            |              |
| 2010       | 859 [±8]  | 1424 [±11]   | 320 [±5]       | 5926 [±22] | 26711 [±46]  |
| 2020       | 944 [±9]  | 1799 [±12]   | 301 [±5]       | 5331 [±20] | 26234 [±45]  |
| 2030       | 1029 [±9] | 1864 [±12]   | 327 [±5]       | 5356 [±21] | 27758 [±47]  |
| Scenario 2 |           |              |                |            |              |
| 2010       | 853 [±8]  | 1425 [±11]   | 318 [±5]       | 5917 [±22] | 26705 [±46]  |
| 2020       | 930 [±9]  | 1737 [±12]   | 292 [±5]       | 5092 [±20] | 26056 [±45]  |
| 2030       | 1025 [±9] | 1809 [±12]   | 318 [±5]       | 4917 [±20] | 27326 [±46]  |

**Table A16. Prevalence cases avoided in year [per 100000] for Armenia**

| Year       | Cancers  | CHD & Stroke | Osteoarthritis | Diabetes  | Hypertension |
|------------|----------|--------------|----------------|-----------|--------------|
| Scenario 1 |          |              |                |           |              |
| 2010       | -4 [±12] | -1 [±15]     | -4 [±7]        | 7 [±31]   | 13 [±65]     |
| 2020       | 8 [±12]  | 17 [±17]     | 0 [±7]         | 125 [±29] | 103 [±65]    |
| 2030       | 17 [±13] | 23 [±17]     | 1 [±7]         | 186 [±30] | 265 [±67]    |
| Scenario 2 |          |              |                |           |              |
| 2010       | 2 [±12]  | -2 [±15]     | -2 [±7]        | 16 [±31]  | 19 [±65]     |
| 2020       | 22 [±12] | 79 [±17]     | 9 [±7]         | 364 [±29] | 281 [±65]    |
| 2030       | 21 [±13] | 78 [±17]     | 10 [±7]        | 625 [±29] | 697 [±67]    |

## Azerbaijan

**Table A17. Cumulative incidence cases from year 2010 [per 100000 of population in 2010] for Azerbaijan**

| Year       | Cancers    | CHD & Stroke | Osteoarthritis | Diabetes   | Hypertension |
|------------|------------|--------------|----------------|------------|--------------|
| Scenario 0 |            |              |                |            |              |
| 2010       | 61 [±2]    | 2232 [±13]   | 13 [±1]        | 105 [±3]   | 449 [±6]     |
| 2020       | 669 [±7]   | 17162 [±37]  | 133 [±3]       | 1126 [±9]  | 4965 [±20]   |
| 2030       | 1307 [±10] | 30683 [±49]  | 251 [±4]       | 2148 [±13] | 9870 [±28]   |
| Scenario 1 |            |              |                |            |              |
| 2010       | 62 [±2]    | 2220 [±13]   | 12 [±1]        | 107 [±3]   | 445 [±6]     |
| 2020       | 665 [±7]   | 17008 [±37]  | 129 [±3]       | 1065 [±9]  | 4823 [±19]   |
| 2030       | 1300 [±10] | 30437 [±49]  | 247 [±4]       | 1999 [±12] | 9522 [±27]   |
| Scenario 2 |            |              |                |            |              |
| 2010       | 60 [±2]    | 2231 [±13]   | 13 [±1]        | 110 [±3]   | 444 [±6]     |
| 2020       | 641 [±7]   | 16616 [±36]  | 123 [±3]       | 895 [±8]   | 4573 [±19]   |
| 2030       | 1257 [±10] | 29810 [±48]  | 234 [±4]       | 1690 [±11] | 9029 [±27]   |

**Table A18. Cumulative incidence cases avoided from year 2010 [per 100000 of population in 2010] for Azerbaijan**

| Year       | Cancers  | CHD & Stroke | Osteoarthritis | Diabetes  | Hypertension |
|------------|----------|--------------|----------------|-----------|--------------|
| Scenario 1 |          |              |                |           |              |
| 2010       | 0 [±4]   | 0 [±12]      | -1 [±2]        | -1 [±6]   | 3 [±10]      |
| 2020       | 10 [±14] | 118 [±36]    | 3 [±5]         | 154 [±20] | 127 [±33]    |
| 2030       | 26 [±20] | 237 [±49]    | 7 [±7]         | 281 [±27] | 328 [±48]    |
| Scenario 2 |          |              |                |           |              |
| 2010       | -1 [±4]  | 3 [±12]      | 1 [±2]         | 0 [±6]    | 2 [±10]      |
| 2020       | 41 [±14] | 484 [±35]    | 15 [±5]        | 504 [±19] | 405 [±33]    |
| 2030       | 87 [±20] | 851 [±48]    | 21 [±7]        | 954 [±26] | 942 [±47]    |

**Table A19. Prevalence cases in year [per 100000] for Azerbaijan**

| Year       | Cancers   | CHD & Stroke | Osteoarthritis | Diabetes   | Hypertension |
|------------|-----------|--------------|----------------|------------|--------------|
| Scenario 0 |           |              |                |            |              |
| 2010       | 855 [±8]  | 1423 [±11]   | 316 [±5]       | 5933 [±22] | 26724 [±46]  |
| 2020       | 952 [±9]  | 1816 [±12]   | 301 [±5]       | 5456 [±21] | 26337 [±46]  |
| 2030       | 1046 [±9] | 1887 [±12]   | 328 [±5]       | 5542 [±21] | 28023 [±47]  |
| Scenario 1 |           |              |                |            |              |
| 2010       | 859 [±8]  | 1424 [±11]   | 320 [±5]       | 5926 [±22] | 26711 [±46]  |
| 2020       | 944 [±9]  | 1799 [±12]   | 301 [±5]       | 5331 [±20] | 26234 [±45]  |
| 2030       | 1029 [±9] | 1864 [±12]   | 327 [±5]       | 5356 [±21] | 27758 [±47]  |
| Scenario 2 |           |              |                |            |              |
| 2010       | 853 [±8]  | 1425 [±11]   | 318 [±5]       | 5917 [±22] | 26705 [±46]  |
| 2020       | 930 [±9]  | 1737 [±12]   | 292 [±5]       | 5092 [±20] | 26056 [±45]  |
| 2030       | 1025 [±9] | 1809 [±12]   | 318 [±5]       | 4917 [±20] | 27326 [±46]  |

**Table A20. Prevalence cases avoided in year [per 100000] for Azerbaijan**

| Year       | Cancers  | CHD & Stroke | Osteoarthritis | Diabetes  | Hypertension |
|------------|----------|--------------|----------------|-----------|--------------|
| Scenario 1 |          |              |                |           |              |
| 2010       | -4 [±12] | -1 [±15]     | -4 [±7]        | 7 [±31]   | 13 [±65]     |
| 2020       | 8 [±12]  | 17 [±17]     | 0 [±7]         | 125 [±29] | 103 [±65]    |
| 2030       | 17 [±13] | 23 [±17]     | 1 [±7]         | 186 [±30] | 265 [±67]    |
| Scenario 2 |          |              |                |           |              |
| 2010       | 2 [±12]  | -2 [±15]     | -2 [±7]        | 16 [±31]  | 19 [±65]     |
| 2020       | 22 [±12] | 79 [±17]     | 9 [±7]         | 364 [±29] | 281 [±65]    |
| 2030       | 21 [±13] | 78 [±17]     | 10 [±7]        | 625 [±29] | 697 [±67]    |

## Belarus

**Table A21. Cumulative incidence cases from year 2010 [per 100000 of population in 2010] for Belarus**

| Year       | Cancers    | CHD & Stroke | Osteoarthritis | Diabetes   | Hypertension |
|------------|------------|--------------|----------------|------------|--------------|
| Scenario 0 |            |              |                |            |              |
| 2010       | 148 [±3]   | 714 [±8]     | 17 [±1]        | 276 [±5]   | 1003 [±9]    |
| 2020       | 1780 [±12] | 8396 [±26]   | 195 [±4]       | 3204 [±16] | 11195 [±31]  |
| 2030       | 3815 [±19] | 18167 [±40]  | 422 [±6]       | 6810 [±25] | 22512 [±45]  |
| Scenario 1 |            |              |                |            |              |
| 2010       | 146 [±3]   | 715 [±8]     | 17 [±1]        | 277 [±5]   | 1004 [±9]    |
| 2020       | 1739 [±12] | 8255 [±26]   | 195 [±4]       | 2955 [±16] | 10860 [±30]  |
| 2030       | 3737 [±18] | 17785 [±40]  | 418 [±6]       | 6312 [±24] | 21991 [±44]  |
| Scenario 2 |            |              |                |            |              |
| 2010       | 147 [±3]   | 717 [±8]     | 17 [±1]        | 276 [±5]   | 1002 [±9]    |
| 2020       | 1697 [±12] | 7936 [±26]   | 183 [±4]       | 2501 [±14] | 10323 [±29]  |
| 2030       | 3598 [±18] | 17067 [±39]  | 396 [±6]       | 5340 [±22] | 20872 [±43]  |

**Table A22. Cumulative incidence cases avoided from year 2010 [per 100000 of population in 2010] for Belarus**

| Year       | Cancers   | CHD & Stroke | Osteoarthritis | Diabetes   | Hypertension |
|------------|-----------|--------------|----------------|------------|--------------|
| Scenario 1 |           |              |                |            |              |
| 2010       | 2 [±5]    | -1 [±11]     | 0 [±2]         | -1 [±7]    | -1 [±13]     |
| 2020       | 41 [±17]  | 141 [±36]    | 0 [±6]         | 249 [±22]  | 335 [±42]    |
| 2030       | 78 [±25]  | 382 [±54]    | 4 [±8]         | 498 [±32]  | 521 [±60]    |
| Scenario 2 |           |              |                |            |              |
| 2010       | 1 [±5]    | -3 [±11]     | 0 [±2]         | 0 [±7]     | 1 [±13]      |
| 2020       | 83 [±17]  | 460 [±36]    | 12 [±5]        | 703 [±21]  | 872 [±41]    |
| 2030       | 217 [±24] | 1100 [±53]   | 26 [±8]        | 1470 [±31] | 1640 [±59]   |

**Table A23. Prevalence cases in year [per 100000] for Belarus**

| Year       | Cancers    | CHD & Stroke | Osteoarthritis | Diabetes   | Hypertension |
|------------|------------|--------------|----------------|------------|--------------|
| Scenario 0 |            |              |                |            |              |
| 2010       | 1436 [±11] | 3046 [±16]   | 388 [±6]       | 6321 [±22] | 34492 [±53]  |
| 2020       | 1742 [±12] | 4279 [±19]   | 420 [±6]       | 7155 [±24] | 38390 [±56]  |
| 2030       | 2011 [±13] | 5267 [±22]   | 481 [±7]       | 7989 [±27] | 41598 [±61]  |
| Scenario 1 |            |              |                |            |              |
| 2010       | 1428 [±11] | 3051 [±16]   | 388 [±6]       | 6318 [±22] | 34490 [±53]  |
| 2020       | 1715 [±12] | 4207 [±19]   | 422 [±6]       | 6950 [±24] | 38115 [±56]  |
| 2030       | 1980 [±13] | 5166 [±22]   | 479 [±7]       | 7664 [±26] | 41245 [±61]  |
| Scenario 2 |            |              |                |            |              |
| 2010       | 1436 [±11] | 3044 [±16]   | 384 [±6]       | 6306 [±22] | 34446 [±52]  |
| 2020       | 1691 [±12] | 4092 [±18]   | 408 [±6]       | 6570 [±23] | 37605 [±56]  |
| 2030       | 1923 [±13] | 4984 [±21]   | 461 [±6]       | 6987 [±25] | 40353 [±60]  |

**Table A24. Prevalence cases avoided in year [per 100000] for Belarus**

| Year       | Cancers  | CHD & Stroke | Osteoarthritis | Diabetes   | Hypertension |
|------------|----------|--------------|----------------|------------|--------------|
| Scenario 1 |          |              |                |            |              |
| 2010       | 8 [±15]  | -5 [±22]     | 0 [±8]         | 3 [±32]    | 2 [±74]      |
| 2020       | 27 [±17] | 72 [±26]     | -2 [±8]        | 205 [±34]  | 275 [±78]    |
| 2030       | 31 [±18] | 101 [±29]    | 2 [±9]         | 325 [±35]  | 353 [±81]    |
| Scenario 2 |          |              |                |            |              |
| 2010       | 0 [±15]  | 2 [±22]      | 4 [±8]         | 15 [±32]   | 46 [±74]     |
| 2020       | 51 [±17] | 187 [±26]    | 12 [±8]        | 585 [±33]  | 785 [±78]    |
| 2030       | 88 [±18] | 283 [±29]    | 20 [±9]        | 1002 [±35] | 1245 [±81]   |



## Belgium

**Table A25. Cumulative incidence cases from year 2010 [per 100000 of population in 2010] for Belgium**

| Year       | Cancers    | CHD & Stroke | Osteoarthritis | Diabetes   | Hypertension |
|------------|------------|--------------|----------------|------------|--------------|
| Scenario 0 |            |              |                |            |              |
| 2010       | 245 [±4]   | 940 [±9]     | 853 [±8]       | 266 [±5]   | 785 [±8]     |
| 2020       | 2764 [±15] | 9773 [±28]   | 9921 [±29]     | 2942 [±16] | 8756 [±27]   |
| 2030       | 5488 [±22] | 19130 [±41]  | 20051 [±41]    | 6007 [±23] | 17459 [±39]  |
| Scenario 1 |            |              |                |            |              |
| 2010       | 245 [±4]   | 939 [±9]     | 857 [±8]       | 262 [±5]   | 774 [±8]     |
| 2020       | 2742 [±15] | 9627 [±28]   | 9781 [±28]     | 2794 [±15] | 8536 [±27]   |
| 2030       | 5434 [±22] | 18771 [±40]  | 19744 [±41]    | 5728 [±22] | 16973 [±38]  |
| Scenario 2 |            |              |                |            |              |
| 2010       | 245 [±4]   | 932 [±9]     | 854 [±8]       | 263 [±5]   | 773 [±8]     |
| 2020       | 2681 [±15] | 9156 [±27]   | 9310 [±28]     | 2413 [±14] | 7993 [±26]   |
| 2030       | 5300 [±21] | 17848 [±39]  | 18953 [±40]    | 4952 [±21] | 15931 [±37]  |

**Table A26. Cumulative incidence cases avoided from year 2010 [per 100000 of population in 2010] Belgium**

| Year       | Cancers   | CHD & Stroke | Osteoarthritis | Diabetes   | Hypertension |
|------------|-----------|--------------|----------------|------------|--------------|
| Scenario 1 |           |              |                |            |              |
| 2010       | 0 [±6]    | 1 [±12]      | 0 [±12]        | 4 [±6]     | 11 [±11]     |
| 2020       | 22 [±21]  | 146 [±39]    | 140 [±40]      | 148 [±21]  | 220 [±37]    |
| 2030       | 54 [±30]  | 359 [±55]    | 307 [±56]      | 279 [±31]  | 486 [±52]    |
| Scenario 2 |           |              |                |            |              |
| 2010       | 0 [±6]    | 8 [±12]      | 0 [±12]        | 3 [±7]     | 12 [±11]     |
| 2020       | 83 [±21]  | 617 [±39]    | 611 [±39]      | 529 [±21]  | 763 [±37]    |
| 2030       | 188 [±29] | 1282 [±54]   | 1098 [±56]     | 1055 [±30] | 1528 [±52]   |

**Table A27. Prevalence cases in year [per 100000] for Belgium**

| Year       | Cancers    | CHD & Stroke | Osteoarthritis | Diabetes   | Hypertension |
|------------|------------|--------------|----------------|------------|--------------|
| Scenario 0 |            |              |                |            |              |
| 2010       | 2285 [±14] | 2052 [±13]   | 18497 [±38]    | 3900 [±18] | 16167 [±36]  |
| 2020       | 2502 [±14] | 2557 [±15]   | 18697 [±39]    | 3415 [±17] | 16692 [±37]  |
| 2030       | 2655 [±15] | 2770 [±15]   | 19770 [±41]    | 3580 [±18] | 17569 [±39]  |
| Scenario 1 |            |              |                |            |              |
| 2010       | 2291 [±14] | 2054 [±13]   | 18497 [±38]    | 3890 [±18] | 16189 [±36]  |
| 2020       | 2496 [±14] | 2521 [±14]   | 18600 [±39]    | 3333 [±17] | 16552 [±37]  |
| 2030       | 2635 [±15] | 2709 [±15]   | 19613 [±41]    | 3460 [±17] | 17278 [±38]  |
| Scenario 2 |            |              |                |            |              |
| 2010       | 2280 [±14] | 2045 [±13]   | 18461 [±38]    | 3889 [±18] | 16172 [±36]  |
| 2020       | 2468 [±14] | 2418 [±14]   | 18296 [±39]    | 3135 [±16] | 16215 [±37]  |
| 2030       | 2616 [±15] | 2613 [±15]   | 19275 [±41]    | 3154 [±16] | 16760 [±38]  |

**Table A28. Prevalence cases avoided in year [per 100000] Belgium**

| Year       | Cancers  | CHD & Stroke | Osteoarthritis | Diabetes  | Hypertension |
|------------|----------|--------------|----------------|-----------|--------------|
| Scenario 1 |          |              |                |           |              |
| 2010       | 0 [±19]  | 0 [±18]      | 0 [±54]        | 10 [±25]  | 0 [±51]      |
| 2020       | 6 [±20]  | 36 [±20]     | 97 [±55]       | 82 [±23]  | 140 [±52]    |
| 2030       | 20 [±21] | 61 [±21]     | 157 [±56]      | 120 [±24] | 291 [±53]    |
| Scenario 2 |          |              |                |           |              |
| 2010       | 5 [±19]  | 7 [±18]      | 36 [±54]       | 11 [±25]  | -5 [±51]     |
| 2020       | 34 [±20] | 139 [±20]    | 401 [±54]      | 280 [±23] | 477 [±51]    |
| 2030       | 39 [±21] | 157 [±21]    | 495 [±56]      | 426 [±23] | 809 [±52]    |

## Bosnia &amp; Herzegovina

**Table A29. Cumulative incidence cases from year 2010 [per 100000 of population in 2010] for Bosnia and Herzegovina**

| Year       | Cancers    | CHD & Stroke | Osteoarthritis | Diabetes   | Hypertension |
|------------|------------|--------------|----------------|------------|--------------|
| Scenario 0 |            |              |                |            |              |
| 2010       | 114 [±3]   | 631 [±7]     | 17 [±1]        | 251 [±4]   | 855 [±8]     |
| 2020       | 1339 [±11] | 7268 [±25]   | 191 [±4]       | 2828 [±15] | 9452 [±28]   |
| 2030       | 2751 [±16] | 15132 [±37]  | 380 [±6]       | 5493 [±22] | 18477 [±40]  |
| Scenario 1 |            |              |                |            |              |
| 2010       | 113 [±3]   | 625 [±7]     | 16 [±1]        | 249 [±4]   | 858 [±8]     |
| 2020       | 1323 [±10] | 7228 [±24]   | 184 [±4]       | 2627 [±15] | 9151 [±28]   |
| 2030       | 2714 [±15] | 15024 [±36]  | 366 [±6]       | 5124 [±21] | 17847 [±40]  |
| Scenario 2 |            |              |                |            |              |
| 2010       | 114 [±3]   | 630 [±7]     | 17 [±1]        | 253 [±4]   | 857 [±8]     |
| 2020       | 1281 [±10] | 7165 [±24]   | 175 [±4]       | 2204 [±14] | 8507 [±27]   |
| 2030       | 2620 [±15] | 14843 [±36]  | 346 [±6]       | 4288 [±19] | 16661 [±38]  |

**Table A30. Cumulative incidence cases avoided from year 2010 [per 100000 of population in 2010] for Bosnia and Herzegovina**

| Year       | Cancers   | CHD & Stroke | Osteoarthritis | Diabetes   | Hypertension |
|------------|-----------|--------------|----------------|------------|--------------|
| Scenario 1 |           |              |                |            |              |
| 2010       | 1 [±4]    | 6 [±10]      | 1 [±2]         | 2 [±6]     | -3 [±12]     |
| 2020       | 16 [±15]  | 40 [±34]     | 7 [±5]         | 201 [±21]  | 301 [±39]    |
| 2030       | 37 [±21]  | 108 [±49]    | 14 [±8]        | 369 [±29]  | 630 [±54]    |
| Scenario 2 |           |              |                |            |              |
| 2010       | 0 [±4]    | 1 [±10]      | 0 [±2]         | -2 [±6]    | -2 [±12]     |
| 2020       | 58 [±14]  | 103 [±34]    | 16 [±5]        | 624 [±20]  | 945 [±38]    |
| 2030       | 131 [±21] | 289 [±49]    | 34 [±8]        | 1205 [±28] | 1816 [±53]   |

**Table A31. Prevalence cases in year [per 100000] for Bosnia and Herzegovina**

| Year       | Cancers    | CHD & Stroke | Osteoarthritis | Diabetes   | Hypertension |
|------------|------------|--------------|----------------|------------|--------------|
| Scenario 0 |            |              |                |            |              |
| 2010       | 845 [±8]   | 2351 [±14]   | 378 [±6]       | 6659 [±23] | 25035 [±45]  |
| 2020       | 1039 [±9]  | 3216 [±16]   | 422 [±6]       | 7371 [±25] | 28209 [±48]  |
| 2030       | 1141 [±10] | 3742 [±18]   | 459 [±6]       | 7847 [±26] | 30438 [±52]  |
| Scenario 1 |            |              |                |            |              |
| 2010       | 841 [±8]   | 2342 [±14]   | 373 [±5]       | 6659 [±23] | 25046 [±45]  |
| 2020       | 1031 [±9]  | 3202 [±16]   | 416 [±6]       | 7181 [±24] | 27921 [±48]  |
| 2030       | 1132 [±10] | 3718 [±18]   | 450 [±6]       | 7532 [±26] | 29882 [±51]  |
| Scenario 2 |            |              |                |            |              |
| 2010       | 843 [±8]   | 2348 [±14]   | 375 [±5]       | 6651 [±23] | 25033 [±45]  |
| 2020       | 1011 [±9]  | 3181 [±16]   | 409 [±6]       | 6799 [±24] | 27314 [±48]  |
| 2030       | 1100 [±10] | 3670 [±18]   | 434 [±6]       | 6868 [±25] | 28862 [±51]  |

**Table A32. Prevalence cases avoided in year [per 100000] for Bosnia and Herzegovina**

| Year       | Cancers  | CHD & Stroke | Osteoarthritis | Diabetes  | Hypertension |
|------------|----------|--------------|----------------|-----------|--------------|
| Scenario 1 |          |              |                |           |              |
| 2010       | 4 [±12]  | 9 [±19]      | 5 [±8]         | 0 [±33]   | -11 [±63]    |
| 2020       | 8 [±13]  | 14 [±23]     | 6 [±8]         | 190 [±34] | 288 [±67]    |
| 2030       | 9 [±13]  | 24 [±24]     | 9 [±9]         | 315 [±35] | 556 [±69]    |
| Scenario 2 |          |              |                |           |              |
| 2010       | 2 [±12]  | 3 [±19]      | 3 [±8]         | 8 [±33]   | 2 [±63]      |
| 2020       | 28 [±13] | 35 [±23]     | 13 [±8]        | 572 [±34] | 895 [±67]    |
| 2030       | 41 [±13] | 72 [±24]     | 25 [±8]        | 979 [±34] | 1576 [±69]   |

## Bulgaria

**Table A33. Cumulative incidence cases from year 2010 [per 100000 of population in 2010] for Bulgaria**

| Year       | Cancers    | CHD & Stroke | Osteoarthritis | Diabetes   | Hypertension |
|------------|------------|--------------|----------------|------------|--------------|
| Scenario 0 |            |              |                |            |              |
| 2010       | 171 [±4]   | 1406 [±11]   | 18 [±1]        | 233 [±4]   | 705 [±8]     |
| 2020       | 1933 [±13] | 12944 [±34]  | 215 [±4]       | 2856 [±16] | 8520 [±27]   |
| 2030       | 3974 [±20] | 25378 [±50]  | 445 [±7]       | 5957 [±24] | 17732 [±42]  |
| Scenario 1 |            |              |                |            |              |
| 2010       | 170 [±4]   | 1410 [±11]   | 19 [±1]        | 234 [±4]   | 696 [±7]     |
| 2020       | 1910 [±13] | 12760 [±34]  | 215 [±4]       | 2645 [±15] | 8225 [±27]   |
| 2030       | 3914 [±20] | 24915 [±49]  | 439 [±7]       | 5521 [±23] | 17183 [±41]  |
| Scenario 2 |            |              |                |            |              |
| 2010       | 171 [±4]   | 1407 [±11]   | 18 [±1]        | 231 [±4]   | 706 [±8]     |
| 2020       | 1842 [±13] | 12113 [±33]  | 202 [±4]       | 2173 [±14] | 7602 [±26]   |
| 2030       | 3779 [±19] | 23702 [±48]  | 414 [±6]       | 4569 [±21] | 15927 [±39]  |

**Table A34. Cumulative incidence cases avoided from year 2010 [per 100000] Bulgaria**

| Year       | Cancers   | CHD & Stroke | Osteoarthritis | Diabetes   | Hypertension |
|------------|-----------|--------------|----------------|------------|--------------|
| Scenario 1 |           |              |                |            |              |
| 2010       | 1 [±5]    | -4 [±15]     | -1 [±2]        | -1 [±6]    | 9 [±11]      |
| 2020       | 23 [±18]  | 184 [±45]    | 0 [±6]         | 211 [±21]  | 295 [±37]    |
| 2030       | 60 [±25]  | 463 [±63]    | 6 [±8]         | 436 [±30]  | 549 [±53]    |
| Scenario 2 |           |              |                |            |              |
| 2010       | 0 [±5]    | -1 [±15]     | 0 [±2]         | 2 [±6]     | -1 [±11]     |
| 2020       | 91 [±17]  | 831 [±45]    | 13 [±6]        | 683 [±20]  | 918 [±36]    |
| 2030       | 195 [±25] | 1676 [±63]   | 31 [±8]        | 1388 [±29] | 1805 [±52]   |

**Table A35. Prevalence cases in year [per 100000] for Bulgaria**

| Year       | Cancers           | CHD & Stroke      | Osteoarthritis  | Diabetes          | Hypertension       |
|------------|-------------------|-------------------|-----------------|-------------------|--------------------|
| Scenario 0 |                   |                   |                 |                   |                    |
| 2010       | 1047 [ $\pm 9$ ]  | 2342 [ $\pm 14$ ] | 406 [ $\pm 6$ ] | 6690 [ $\pm 23$ ] | 17721 [ $\pm 38$ ] |
| 2020       | 1152 [ $\pm 10$ ] | 2431 [ $\pm 15$ ] | 383 [ $\pm 6$ ] | 5910 [ $\pm 23$ ] | 17794 [ $\pm 40$ ] |
| 2030       | 1250 [ $\pm 11$ ] | 2576 [ $\pm 16$ ] | 404 [ $\pm 6$ ] | 6227 [ $\pm 25$ ] | 19104 [ $\pm 43$ ] |
| Scenario 1 |                   |                   |                 |                   |                    |
| 2010       | 1049 [ $\pm 9$ ]  | 2345 [ $\pm 14$ ] | 402 [ $\pm 6$ ] | 6691 [ $\pm 23$ ] | 17718 [ $\pm 38$ ] |
| 2020       | 1149 [ $\pm 10$ ] | 2416 [ $\pm 15$ ] | 380 [ $\pm 6$ ] | 5759 [ $\pm 23$ ] | 17587 [ $\pm 39$ ] |
| 2030       | 1227 [ $\pm 11$ ] | 2509 [ $\pm 16$ ] | 399 [ $\pm 6$ ] | 5936 [ $\pm 24$ ] | 18773 [ $\pm 43$ ] |
| Scenario 2 |                   |                   |                 |                   |                    |
| 2010       | 1047 [ $\pm 9$ ]  | 2341 [ $\pm 14$ ] | 406 [ $\pm 6$ ] | 6696 [ $\pm 23$ ] | 17749 [ $\pm 38$ ] |
| 2020       | 1122 [ $\pm 10$ ] | 2320 [ $\pm 14$ ] | 380 [ $\pm 6$ ] | 5467 [ $\pm 22$ ] | 17227 [ $\pm 39$ ] |
| 2030       | 1201 [ $\pm 11$ ] | 2413 [ $\pm 15$ ] | 391 [ $\pm 6$ ] | 5381 [ $\pm 23$ ] | 18096 [ $\pm 42$ ] |

**Table A36. Prevalence cases avoided in year [per 100000] Bulgaria**

| Year       | Cancers         | CHD & Stroke     | Osteoarthritis | Diabetes         | Hypertension      |
|------------|-----------------|------------------|----------------|------------------|-------------------|
| Scenario 1 |                 |                  |                |                  |                   |
| 2010       | -2 [ $\pm 13$ ] | -3 [ $\pm 19$ ]  | 4 [ $\pm 8$ ]  | -1 [ $\pm 33$ ]  | 3 [ $\pm 53$ ]    |
| 2020       | 3 [ $\pm 14$ ]  | 15 [ $\pm 20$ ]  | 3 [ $\pm 8$ ]  | 151 [ $\pm 31$ ] | 207 [ $\pm 53$ ]  |
| 2030       | 23 [ $\pm 14$ ] | 67 [ $\pm 20$ ]  | 5 [ $\pm 8$ ]  | 291 [ $\pm 31$ ] | 331 [ $\pm 55$ ]  |
| Scenario 2 |                 |                  |                |                  |                   |
| 2010       | 0 [ $\pm 13$ ]  | 1 [ $\pm 19$ ]   | 0 [ $\pm 8$ ]  | -6 [ $\pm 33$ ]  | -28 [ $\pm 53$ ]  |
| 2020       | 30 [ $\pm 13$ ] | 111 [ $\pm 19$ ] | 3 [ $\pm 8$ ]  | 443 [ $\pm 30$ ] | 567 [ $\pm 53$ ]  |
| 2030       | 49 [ $\pm 14$ ] | 163 [ $\pm 20$ ] | 13 [ $\pm 8$ ] | 846 [ $\pm 30$ ] | 1008 [ $\pm 55$ ] |

## Croatia

**Table A37. Cumulative incidence cases from year 2010 [per 100000 of population in 2010] for Croatia**

| Year       | Cancers    | CHD & Stroke | Osteoarthritis | Diabetes   | Hypertension |
|------------|------------|--------------|----------------|------------|--------------|
| Scenario 0 |            |              |                |            |              |
| 2010       | 191 [±4]   | 1638 [±11]   | 21 [±1]        | 245 [±4]   | 725 [±8]     |
| 2020       | 2110 [±13] | 15814 [±37]  | 237 [±4]       | 2727 [±15] | 8294 [±27]   |
| 2030       | 4246 [±20] | 30803 [±53]  | 473 [±7]       | 5463 [±22] | 16797 [±39]  |
| Scenario 1 |            |              |                |            |              |
| 2010       | 190 [±4]   | 1636 [±11]   | 22 [±1]        | 241 [±4]   | 722 [±8]     |
| 2020       | 2083 [±13] | 15586 [±36]  | 230 [±4]       | 2546 [±15] | 8035 [±26]   |
| 2030       | 4209 [±20] | 30390 [±53]  | 465 [±7]       | 5067 [±22] | 16327 [±39]  |
| Scenario 2 |            |              |                |            |              |
| 2010       | 189 [±4]   | 1634 [±11]   | 21 [±1]        | 239 [±4]   | 725 [±8]     |
| 2020       | 2015 [±13] | 14946 [±36]  | 216 [±4]       | 2033 [±13] | 7402 [±25]   |
| 2030       | 4061 [±19] | 29012 [±51]  | 434 [±6]       | 4036 [±19] | 14990 [±37]  |

**Table A38. Cumulative incidence cases avoided from year 2010 [per 100000 of population in 2010] for Croatia**

| Year       | Cancers   | CHD & Stroke | Osteoarthritis | Diabetes   | Hypertension |
|------------|-----------|--------------|----------------|------------|--------------|
| Scenario 1 |           |              |                |            |              |
| 2010       | 1 [±6]    | 2 [±16]      | -1 [±2]        | 4 [±6]     | 3 [±11]      |
| 2020       | 27 [±18]  | 228 [±50]    | 7 [±6]         | 181 [±21]  | 259 [±36]    |
| 2030       | 37 [±26]  | 413 [±70]    | 8 [±9]         | 396 [±29]  | 470 [±51]    |
| Scenario 2 |           |              |                |            |              |
| 2010       | 2 [±6]    | 4 [±16]      | 0 [±2]         | 6 [±6]     | 0 [±11]      |
| 2020       | 95 [±18]  | 868 [±50]    | 21 [±6]        | 694 [±20]  | 892 [±35]    |
| 2030       | 185 [±26] | 1791 [±69]   | 39 [±9]        | 1427 [±28] | 1807 [±50]   |

**Table A39. Prevalence cases in year [per 100000] for Croatia**

| Year       | Cancers    | CHD & Stroke | Osteoarthritis | Diabetes   | Hypertension |
|------------|------------|--------------|----------------|------------|--------------|
| Scenario 0 |            |              |                |            |              |
| 2010       | 1169 [±10] | 5254 [±21]   | 449 [±6]       | 5814 [±22] | 16856 [±37]  |
| 2020       | 1276 [±10] | 5750 [±22]   | 426 [±6]       | 5615 [±22] | 17878 [±39]  |
| 2030       | 1364 [±11] | 6116 [±24]   | 442 [±6]       | 5941 [±23] | 19300 [±42]  |
| Scenario 1 |            |              |                |            |              |
| 2010       | 1162 [±10] | 5250 [±20]   | 448 [±6]       | 5812 [±22] | 16881 [±37]  |
| 2020       | 1264 [±10] | 5717 [±22]   | 422 [±6]       | 5498 [±22] | 17720 [±39]  |
| 2030       | 1368 [±11] | 6073 [±24]   | 440 [±6]       | 5681 [±23] | 19020 [±42]  |
| Scenario 2 |            |              |                |            |              |
| 2010       | 1159 [±10] | 5241 [±20]   | 446 [±6]       | 5800 [±22] | 16845 [±37]  |
| 2020       | 1245 [±10] | 5571 [±22]   | 416 [±6]       | 5145 [±21] | 17264 [±38]  |
| 2030       | 1336 [±11] | 5853 [±23]   | 426 [±6]       | 5034 [±21] | 18195 [±41]  |

**Table A40. Prevalence cases avoided in year [per 100000] for Croatia**

| Year       | Cancers  | CHD & Stroke | Osteoarthritis | Diabetes  | Hypertension |
|------------|----------|--------------|----------------|-----------|--------------|
| Scenario 1 |          |              |                |           |              |
| 2010       | 7 [±14]  | 4 [±29]      | 1 [±8]         | 2 [±30]   | -25 [±52]    |
| 2020       | 12 [±14] | 33 [±30]     | 4 [±8]         | 117 [±30] | 158 [±53]    |
| 2030       | -4 [±15] | 43 [±31]     | 2 [±8]         | 260 [±30] | 280 [±55]    |
| Scenario 2 |          |              |                |           |              |
| 2010       | 10 [±14] | 13 [±29]     | 3 [±8]         | 14 [±30]  | 11 [±52]     |
| 2020       | 31 [±14] | 179 [±30]    | 10 [±8]        | 470 [±29] | 614 [±53]    |
| 2030       | 28 [±15] | 263 [±31]    | 16 [±8]        | 907 [±30] | 1105 [±55]   |



## Cyprus

**Table A41. Cumulative incidence cases from year 2010 [per 100000 of population in 2010] for Cyprus**

| Year       | Cancers    | CHD & Stroke | Osteoarthritis | Diabetes   | Hypertension |
|------------|------------|--------------|----------------|------------|--------------|
| Scenario 0 |            |              |                |            |              |
| 2010       | 105 [±3]   | 924 [±9]     | 181 [±4]       | 121 [±3]   | 573 [±7]     |
| 2020       | 1196 [±10] | 9939 [±28]   | 2095 [±13]     | 1395 [±10] | 6471 [±23]   |
| 2030       | 2395 [±14] | 20261 [±40]  | 4192 [±18]     | 2923 [±15] | 13220 [±32]  |
| Scenario 1 |            |              |                |            |              |
| 2010       | 106 [±3]   | 917 [±9]     | 183 [±4]       | 124 [±3]   | 568 [±7]     |
| 2020       | 1186 [±10] | 9778 [±28]   | 2050 [±13]     | 1316 [±10] | 6277 [±22]   |
| 2030       | 2367 [±14] | 19843 [±40]  | 4102 [±18]     | 2722 [±15] | 12814 [±32]  |
| Scenario 2 |            |              |                |            |              |
| 2010       | 104 [±3]   | 915 [±9]     | 183 [±4]       | 124 [±3]   | 574 [±7]     |
| 2020       | 1160 [±10] | 9283 [±27]   | 1944 [±12]     | 1092 [±9]  | 5810 [±21]   |
| 2030       | 2312 [±14] | 18881 [±39]  | 3896 [±18]     | 2266 [±13] | 11882 [±31]  |

**Table A42. Cumulative incidence cases avoided from year 2010 [per 100000 of population in 2010] Cyprus**

| Year       | Cancers  | CHD & Stroke | Osteoarthritis | Diabetes  | Hypertension |
|------------|----------|--------------|----------------|-----------|--------------|
| Scenario 1 |          |              |                |           |              |
| 2010       | 0 [±4]   | 7 [±12]      | 0 [±5]         | 0 [±4]    | 5 [±10]      |
| 2020       | 10 [±14] | 161 [±40]    | 45 [±18]       | 79 [±15]  | 194 [±32]    |
| 2030       | 28 [±20] | 418 [±57]    | 90 [±26]       | 201 [±21] | 406 [±46]    |
| Scenario 2 |          |              |                |           |              |
| 2010       | 1 [±4]   | 9 [±12]      | -2 [±5]        | -3 [±4]   | -1 [±10]     |
| 2020       | 36 [±14] | 656 [±39]    | 151 [±18]      | 303 [±14] | 661 [±31]    |
| 2030       | 83 [±19] | 1380 [±56]   | 296 [±25]      | 657 [±20] | 1338 [±45]   |

**Table A43. Prevalence cases in year [per 100000] for Cyprus**

| Year       | Cancers    | CHD & Stroke | Osteoarthritis | Diabetes   | Hypertension |
|------------|------------|--------------|----------------|------------|--------------|
| Scenario 0 |            |              |                |            |              |
| 2010       | 1114 [±9]  | 4253 [±18]   | 3496 [±17]     | 1762 [±12] | 8899 [±27]   |
| 2020       | 1299 [±10] | 5098 [±20]   | 3837 [±17]     | 2017 [±13] | 10616 [±29]  |
| 2030       | 1454 [±11] | 5973 [±22]   | 4334 [±19]     | 2348 [±14] | 12448 [±32]  |
| Scenario 1 |            |              |                |            |              |
| 2010       | 1121 [±9]  | 4258 [±18]   | 3491 [±17]     | 1755 [±12] | 8899 [±27]   |
| 2020       | 1301 [±10] | 5013 [±20]   | 3787 [±17]     | 1954 [±12] | 10462 [±29]  |
| 2030       | 1437 [±11] | 5814 [±22]   | 4258 [±18]     | 2226 [±13] | 12171 [±31]  |
| Scenario 2 |            |              |                |            |              |
| 2010       | 1122 [±9]  | 4264 [±18]   | 3494 [±17]     | 1764 [±12] | 8918 [±27]   |
| 2020       | 1287 [±10] | 4791 [±19]   | 3721 [±17]     | 1804 [±12] | 10126 [±28]  |
| 2030       | 1422 [±11] | 5517 [±21]   | 4144 [±18]     | 1983 [±13] | 11614 [±30]  |

**Table A44. Prevalence cases avoided in year [per 100000] Cyprus**

| Year       | Cancers  | CHD & Stroke | Osteoarthritis | Diabetes  | Hypertension |
|------------|----------|--------------|----------------|-----------|--------------|
| Scenario 1 |          |              |                |           |              |
| 2010       | 0 [±13]  | 0 [±26]      | 5 [±24]        | 7 [±17]   | 0 [±38]      |
| 2020       | 0 [±14]  | 85 [±28]     | 50 [±25]       | 63 [±18]  | 154 [±41]    |
| 2030       | 17 [±15] | 159 [±31]    | 76 [±26]       | 122 [±19] | 277 [±44]    |
| Scenario 2 |          |              |                |           |              |
| 2010       | 0 [±13]  | -11 [±26]    | 2 [±24]        | -2 [±17]  | -19 [±38]    |
| 2020       | 12 [±14] | 307 [±28]    | 116 [±25]      | 213 [±17] | 490 [±41]    |
| 2030       | 32 [±15] | 456 [±30]    | 190 [±26]      | 365 [±19] | 834 [±44]    |

## Czech Republic

**Table A45. Cumulative incidence cases from year 2010 [per 100000 of population in 2010] for Czech Republic**

| Year       | Cancers           | CHD & Stroke       | Osteoarthritis  | Diabetes          | Hypertension       |
|------------|-------------------|--------------------|-----------------|-------------------|--------------------|
| Scenario 0 |                   |                    |                 |                   |                    |
| 2010       | 217 [ $\pm 4$ ]   | 1886 [ $\pm 12$ ]  | 19 [ $\pm 1$ ]  | 275 [ $\pm 5$ ]   | 758 [ $\pm 8$ ]    |
| 2020       | 2666 [ $\pm 16$ ] | 17906 [ $\pm 41$ ] | 255 [ $\pm 5$ ] | 3272 [ $\pm 18$ ] | 9443 [ $\pm 30$ ]  |
| 2030       | 6015 [ $\pm 27$ ] | 38310 [ $\pm 67$ ] | 571 [ $\pm 8$ ] | 7363 [ $\pm 29$ ] | 21071 [ $\pm 50$ ] |
| Scenario 1 |                   |                    |                 |                   |                    |
| 2010       | 219 [ $\pm 4$ ]   | 1882 [ $\pm 12$ ]  | 21 [ $\pm 1$ ]  | 273 [ $\pm 5$ ]   | 757 [ $\pm 8$ ]    |
| 2020       | 2663 [ $\pm 16$ ] | 17749 [ $\pm 41$ ] | 251 [ $\pm 5$ ] | 3065 [ $\pm 17$ ] | 9196 [ $\pm 30$ ]  |
| 2030       | 5980 [ $\pm 26$ ] | 37856 [ $\pm 67$ ] | 557 [ $\pm 8$ ] | 6867 [ $\pm 28$ ] | 20504 [ $\pm 49$ ] |
| Scenario 2 |                   |                    |                 |                   |                    |
| 2010       | 221 [ $\pm 4$ ]   | 1894 [ $\pm 12$ ]  | 21 [ $\pm 1$ ]  | 276 [ $\pm 5$ ]   | 759 [ $\pm 8$ ]    |
| 2020       | 2596 [ $\pm 16$ ] | 17007 [ $\pm 40$ ] | 239 [ $\pm 5$ ] | 2502 [ $\pm 15$ ] | 8488 [ $\pm 29$ ]  |
| 2030       | 5836 [ $\pm 26$ ] | 36230 [ $\pm 65$ ] | 532 [ $\pm 8$ ] | 5523 [ $\pm 25$ ] | 18756 [ $\pm 47$ ] |

**Table A46. Cumulative incidence cases avoided from year 2010 [per 100000 of population in 2010] Czech Republic**

| Year       | Cancers          | CHD & Stroke      | Osteoarthritis | Diabetes          | Hypertension      |
|------------|------------------|-------------------|----------------|-------------------|-------------------|
| Scenario 1 |                  |                   |                |                   |                   |
| 2010       | -2 [ $\pm 6$ ]   | 4 [ $\pm 17$ ]    | -2 [ $\pm 2$ ] | 2 [ $\pm 7$ ]     | 1 [ $\pm 11$ ]    |
| 2020       | 3 [ $\pm 21$ ]   | 157 [ $\pm 53$ ]  | 4 [ $\pm 6$ ]  | 207 [ $\pm 23$ ]  | 247 [ $\pm 39$ ]  |
| 2030       | 35 [ $\pm 31$ ]  | 454 [ $\pm 78$ ]  | 14 [ $\pm 9$ ] | 496 [ $\pm 34$ ]  | 567 [ $\pm 58$ ]  |
| Scenario 2 |                  |                   |                |                   |                   |
| 2010       | -4 [ $\pm 6$ ]   | -8 [ $\pm 17$ ]   | -2 [ $\pm 2$ ] | -1 [ $\pm 7$ ]    | -1 [ $\pm 11$ ]   |
| 2020       | 70 [ $\pm 21$ ]  | 899 [ $\pm 53$ ]  | 16 [ $\pm 6$ ] | 770 [ $\pm 21$ ]  | 955 [ $\pm 38$ ]  |
| 2030       | 179 [ $\pm 31$ ] | 2080 [ $\pm 77$ ] | 39 [ $\pm 9$ ] | 1840 [ $\pm 32$ ] | 2315 [ $\pm 56$ ] |

**Table A47. Prevalence cases in year [per 100000] for Czech Republic**

| Year       | Cancers    | CHD & Stroke | Osteoarthritis | Diabetes   | Hypertension |
|------------|------------|--------------|----------------|------------|--------------|
| Scenario 0 |            |              |                |            |              |
| 2010       | 1291 [±10] | 3494 [±17]   | 451 [±6]       | 6790 [±23] | 17597 [±38]  |
| 2020       | 1555 [±12] | 3740 [±19]   | 471 [±7]       | 6346 [±25] | 19800 [±44]  |
| 2030       | 1849 [±15] | 4363 [±23]   | 553 [±8]       | 7185 [±29] | 23371 [±52]  |
| Scenario 1 |            |              |                |            |              |
| 2010       | 1296 [±10] | 3486 [±17]   | 452 [±6]       | 6791 [±23] | 17621 [±38]  |
| 2020       | 1551 [±12] | 3707 [±19]   | 467 [±7]       | 6188 [±24] | 19640 [±43]  |
| 2030       | 1837 [±15] | 4318 [±22]   | 544 [±8]       | 6879 [±28] | 23017 [±52]  |
| Scenario 2 |            |              |                |            |              |
| 2010       | 1298 [±10] | 3500 [±17]   | 452 [±6]       | 6781 [±23] | 17639 [±38]  |
| 2020       | 1526 [±12] | 3607 [±19]   | 461 [±7]       | 5859 [±24] | 19226 [±43]  |
| 2030       | 1823 [±15] | 4187 [±22]   | 536 [±8]       | 6131 [±27] | 21972 [±51]  |

**Table A48. Prevalence cases avoided in year [per 100000] Czech Republic**

| Year       | Cancers  | CHD & Stroke | Osteoarthritis | Diabetes   | Hypertension |
|------------|----------|--------------|----------------|------------|--------------|
| Scenario 1 |          |              |                |            |              |
| 2010       | -5 [±14] | 8 [±24]      | -1 [±8]        | -1 [±33]   | -24 [±53]    |
| 2020       | 4 [±16]  | 33 [±24]     | 4 [±9]         | 158 [±32]  | 160 [±56]    |
| 2030       | 12 [±17] | 45 [±26]     | 9 [±9]         | 306 [±34]  | 354 [±61]    |
| Scenario 2 |          |              |                |            |              |
| 2010       | -7 [±14] | -6 [±24]     | -1 [±8]        | 9 [±33]    | -42 [±53]    |
| 2020       | 29 [±16] | 133 [±24]    | 10 [±9]        | 487 [±31]  | 574 [±56]    |
| 2030       | 26 [±17] | 176 [±26]    | 17 [±9]        | 1054 [±33] | 1399 [±60]   |

## Denmark

**Table A49. Cumulative incidence cases from year 2010 [per 100000 of population in 2010] for Denmark**

| Year       | Cancers    | CHD & Stroke | Osteoarthritis | Diabetes   | Hypertension |
|------------|------------|--------------|----------------|------------|--------------|
| Scenario 0 |            |              |                |            |              |
| 2010       | 250 [±4]   | 1330 [±10]   | 976 [±9]       | 296 [±5]   | 776 [±8]     |
| 2020       | 2844 [±16] | 12949 [±33]  | 11993 [±32]    | 3536 [±17] | 8810 [±27]   |
| 2030       | 5572 [±22] | 24645 [±47]  | 24016 [±47]    | 7348 [±26] | 17692 [±40]  |
| Scenario 1 |            |              |                |            |              |
| 2010       | 249 [±4]   | 1323 [±10]   | 981 [±9]       | 298 [±5]   | 779 [±8]     |
| 2020       | 2820 [±16] | 12694 [±33]  | 11789 [±32]    | 3323 [±17] | 8544 [±27]   |
| 2030       | 5510 [±22] | 24079 [±47]  | 23661 [±46]    | 6888 [±25] | 17139 [±39]  |
| Scenario 2 |            |              |                |            |              |
| 2010       | 248 [±4]   | 1317 [±10]   | 974 [±9]       | 300 [±5]   | 776 [±8]     |
| 2020       | 2744 [±15] | 12060 [±32]  | 11305 [±31]    | 2851 [±16] | 8023 [±26]   |
| 2030       | 5377 [±22] | 22831 [±45]  | 22825 [±45]    | 5958 [±23] | 16059 [±38]  |

**Table A50. Cumulative incidence cases avoided from year 2010 [per 100000 of population in 2010] Denmark**

| Year       | Cancers   | CHD & Stroke | Osteoarthritis | Diabetes   | Hypertension |
|------------|-----------|--------------|----------------|------------|--------------|
| Scenario 1 |           |              |                |            |              |
| 2010       | 1 [±6]    | 7 [±15]      | 0 [±13]        | 0 [±7]     | 0 [±11]      |
| 2020       | 24 [±21]  | 255 [±45]    | 204 [±44]      | 213 [±23]  | 266 [±37]    |
| 2030       | 62 [±30]  | 566 [±62]    | 355 [±62]      | 460 [±34]  | 553 [±53]    |
| Scenario 2 |           |              |                |            |              |
| 2010       | 2 [±6]    | 13 [±15]     | 2 [±12]        | -4 [±7]    | 0 [±11]      |
| 2020       | 100 [±21] | 889 [±45]    | 688 [±43]      | 685 [±23]  | 787 [±37]    |
| 2030       | 195 [±30] | 1814 [±62]   | 1191 [±61]     | 1390 [±33] | 1633 [±52]   |

**Table A51. Prevalence cases in year [per 100000] for Denmark**

| Year       | Cancers    | CHD & Stroke | Osteoarthritis | Diabetes   | Hypertension |
|------------|------------|--------------|----------------|------------|--------------|
| Scenario 0 |            |              |                |            |              |
| 2010       | 1918 [±12] | 2748 [±15]   | 21670 [±42]    | 5352 [±21] | 15920 [±36]  |
| 2020       | 1962 [±13] | 3063 [±16]   | 21199 [±43]    | 4344 [±19] | 15558 [±36]  |
| 2030       | 1974 [±13] | 3099 [±17]   | 21325 [±44]    | 4504 [±20] | 15810 [±38]  |
| Scenario 1 |            |              |                |            |              |
| 2010       | 1919 [±12] | 2733 [±15]   | 21624 [±42]    | 5371 [±21] | 15909 [±36]  |
| 2020       | 1971 [±13] | 3025 [±16]   | 21056 [±42]    | 4237 [±19] | 15365 [±36]  |
| 2030       | 1971 [±13] | 3031 [±17]   | 21166 [±44]    | 4319 [±20] | 15531 [±37]  |
| Scenario 2 |            |              |                |            |              |
| 2010       | 1903 [±12] | 2730 [±15]   | 21616 [±42]    | 5375 [±21] | 15891 [±36]  |
| 2020       | 1932 [±13] | 2916 [±16]   | 20809 [±42]    | 4005 [±18] | 15090 [±36]  |
| 2030       | 1957 [±13] | 2911 [±16]   | 20881 [±43]    | 3959 [±19] | 15031 [±37]  |

**Table A52. Prevalence cases avoided in year [per 100000] Denmark**

| Year       | Cancers  | CHD & Stroke | Osteoarthritis | Diabetes  | Hypertension |
|------------|----------|--------------|----------------|-----------|--------------|
| Scenario 1 |          |              |                |           |              |
| 2010       | 0 [±18]  | 15 [±21]     | 46 [±59]       | 0 [±29]   | 11 [±50]     |
| 2020       | 0 [±18]  | 38 [±22]     | 143 [±58]      | 107 [±26] | 193 [±50]    |
| 2030       | 3 [±18]  | 68 [±22]     | 159 [±58]      | 185 [±27] | 279 [±50]    |
| Scenario 2 |          |              |                |           |              |
| 2010       | 15 [±17] | 18 [±21]     | 54 [±59]       | -23 [±29] | 29 [±50]     |
| 2020       | 30 [±18] | 147 [±22]    | 390 [±58]      | 339 [±26] | 468 [±50]    |
| 2030       | 17 [±18] | 188 [±22]    | 444 [±58]      | 545 [±26] | 779 [±50]    |

## Estonia

**Table A53. Cumulative incidence cases from year 2010 [per 100000 of population in 2010] for Estonia**

| Year       | Cancers    | CHD & Stroke | Osteoarthritis | Diabetes   | Hypertension |
|------------|------------|--------------|----------------|------------|--------------|
| Scenario 0 |            |              |                |            |              |
| 2010       | 180 [±4]   | 1705 [±12]   | 18 [±1]        | 209 [±4]   | 677 [±7]     |
| 2020       | 1827 [±12] | 14510 [±35]  | 187 [±4]       | 2350 [±14] | 7690 [±26]   |
| 2030       | 3521 [±18] | 26422 [±49]  | 366 [±6]       | 4536 [±20] | 15207 [±37]  |
| Scenario 1 |            |              |                |            |              |
| 2010       | 171 [±4]   | 1701 [±12]   | 16 [±1]        | 209 [±4]   | 682 [±7]     |
| 2020       | 1795 [±12] | 14341 [±35]  | 183 [±4]       | 2208 [±14] | 7487 [±25]   |
| 2030       | 3469 [±18] | 26092 [±49]  | 352 [±6]       | 4230 [±20] | 14766 [±37]  |
| Scenario 2 |            |              |                |            |              |
| 2010       | 174 [±4]   | 1701 [±12]   | 17 [±1]        | 212 [±4]   | 682 [±7]     |
| 2020       | 1735 [±12] | 13723 [±34]  | 169 [±4]       | 1808 [±12] | 6901 [±24]   |
| 2030       | 3365 [±17] | 24959 [±47]  | 328 [±5]       | 3455 [±18] | 13492 [±35]  |

**Table A54. Cumulative incidence cases avoided from year 2010 [per 100000 of population in 2010] Estonia**

| Year       | Cancers   | CHD & Stroke | Osteoarthritis | Diabetes   | Hypertension |
|------------|-----------|--------------|----------------|------------|--------------|
| Scenario 1 |           |              |                |            |              |
| 2010       | 9 [±5]    | 4 [±17]      | 2 [±2]         | 0 [±6]     | -5 [±10]     |
| 2020       | 32 [±17]  | 169 [±48]    | 4 [±5]         | 142 [±19]  | 203 [±35]    |
| 2030       | 52 [±24]  | 330 [±65]    | 14 [±8]        | 306 [±26]  | 441 [±49]    |
| Scenario 2 |           |              |                |            |              |
| 2010       | 6 [±5]    | 4 [±17]      | 1 [±2]         | -3 [±6]    | -5 [±10]     |
| 2020       | 92 [±17]  | 787 [±48]    | 18 [±5]        | 542 [±18]  | 789 [±34]    |
| 2030       | 156 [±23] | 1463 [±64]   | 38 [±7]        | 1081 [±25] | 1715 [±48]   |

**Table A55. Prevalence cases in year [per 100000] for Estonia**

| Year       | Cancers           | CHD & Stroke      | Osteoarthritis  | Diabetes          | Hypertension       |
|------------|-------------------|-------------------|-----------------|-------------------|--------------------|
| Scenario 0 |                   |                   |                 |                   |                    |
| 2010       | 976 [ $\pm 9$ ]   | 3099 [ $\pm 16$ ] | 392 [ $\pm 6$ ] | 5422 [ $\pm 21$ ] | 16964 [ $\pm 37$ ] |
| 2020       | 988 [ $\pm 9$ ]   | 2872 [ $\pm 16$ ] | 343 [ $\pm 5$ ] | 4494 [ $\pm 20$ ] | 15972 [ $\pm 37$ ] |
| 2030       | 1003 [ $\pm 10$ ] | 2837 [ $\pm 16$ ] | 340 [ $\pm 6$ ] | 4515 [ $\pm 20$ ] | 16313 [ $\pm 39$ ] |
| Scenario 1 |                   |                   |                 |                   |                    |
| 2010       | 976 [ $\pm 9$ ]   | 3092 [ $\pm 16$ ] | 392 [ $\pm 6$ ] | 5415 [ $\pm 21$ ] | 16973 [ $\pm 37$ ] |
| 2020       | 977 [ $\pm 9$ ]   | 2842 [ $\pm 16$ ] | 340 [ $\pm 5$ ] | 4388 [ $\pm 19$ ] | 15850 [ $\pm 37$ ] |
| 2030       | 989 [ $\pm 9$ ]   | 2817 [ $\pm 16$ ] | 333 [ $\pm 5$ ] | 4301 [ $\pm 20$ ] | 16050 [ $\pm 38$ ] |
| Scenario 2 |                   |                   |                 |                   |                    |
| 2010       | 977 [ $\pm 9$ ]   | 3096 [ $\pm 16$ ] | 390 [ $\pm 6$ ] | 5418 [ $\pm 21$ ] | 16948 [ $\pm 37$ ] |
| 2020       | 954 [ $\pm 9$ ]   | 2766 [ $\pm 15$ ] | 331 [ $\pm 5$ ] | 4127 [ $\pm 19$ ] | 15473 [ $\pm 36$ ] |
| 2030       | 978 [ $\pm 9$ ]   | 2729 [ $\pm 16$ ] | 322 [ $\pm 5$ ] | 3865 [ $\pm 19$ ] | 15271 [ $\pm 37$ ] |

**Table A56. Prevalence cases avoided in year [per 100000] Estonia**

| Year       | Cancers         | CHD & Stroke     | Osteoarthritis | Diabetes         | Hypertension      |
|------------|-----------------|------------------|----------------|------------------|-------------------|
| Scenario 1 |                 |                  |                |                  |                   |
| 2010       | 0 [ $\pm 12$ ]  | 7 [ $\pm 22$ ]   | 0 [ $\pm 8$ ]  | 7 [ $\pm 29$ ]   | -9 [ $\pm 52$ ]   |
| 2020       | 11 [ $\pm 13$ ] | 30 [ $\pm 21$ ]  | 3 [ $\pm 7$ ]  | 106 [ $\pm 27$ ] | 122 [ $\pm 50$ ]  |
| 2030       | 14 [ $\pm 13$ ] | 20 [ $\pm 21$ ]  | 7 [ $\pm 7$ ]  | 214 [ $\pm 27$ ] | 263 [ $\pm 51$ ]  |
| Scenario 2 |                 |                  |                |                  |                   |
| 2010       | -1 [ $\pm 12$ ] | 3 [ $\pm 22$ ]   | 2 [ $\pm 8$ ]  | 4 [ $\pm 29$ ]   | 16 [ $\pm 52$ ]   |
| 2020       | 34 [ $\pm 12$ ] | 106 [ $\pm 21$ ] | 12 [ $\pm 7$ ] | 367 [ $\pm 26$ ] | 499 [ $\pm 50$ ]  |
| 2030       | 25 [ $\pm 13$ ] | 108 [ $\pm 21$ ] | 18 [ $\pm 7$ ] | 650 [ $\pm 26$ ] | 1042 [ $\pm 50$ ] |



## Finland

**Table A57. Cumulative incidence cases from year 2010 [per 100000 of population in 2010] for Finland**

| Year       | Cancers    | CHD & Stroke | Osteoarthritis | Diabetes   | Hypertension |
|------------|------------|--------------|----------------|------------|--------------|
| Scenario 0 |            |              |                |            |              |
| 2010       | 294 [±5]   | 973 [±9]     | 392 [±6]       | 190 [±4]   | 635 [±7]     |
| 2020       | 3324 [±17] | 10028 [±29]  | 4243 [±19]     | 2174 [±13] | 7066 [±24]   |
| 2030       | 6460 [±24] | 19723 [±41]  | 8033 [±26]     | 4420 [±20] | 14024 [±35]  |
| Scenario 1 |            |              |                |            |              |
| 2010       | 294 [±5]   | 965 [±9]     | 395 [±6]       | 190 [±4]   | 634 [±7]     |
| 2020       | 3290 [±16] | 9913 [±29]   | 4165 [±19]     | 2026 [±13] | 6801 [±24]   |
| 2030       | 6405 [±23] | 19451 [±41]  | 7885 [±26]     | 4100 [±19] | 13480 [±34]  |
| Scenario 2 |            |              |                |            |              |
| 2010       | 296 [±5]   | 964 [±9]     | 399 [±6]       | 191 [±4]   | 632 [±7]     |
| 2020       | 3251 [±16] | 9623 [±28]   | 3946 [±18]     | 1698 [±12] | 6308 [±23]   |
| 2030       | 6325 [±23] | 18858 [±40]  | 7462 [±25]     | 3450 [±17] | 12471 [±33]  |

**Table A58. Cumulative incidence cases avoided from year 2010 [per 100000 of population in 2010] Finland**

| Year       | Cancers   | CHD & Stroke | Osteoarthritis | Diabetes  | Hypertension |
|------------|-----------|--------------|----------------|-----------|--------------|
| Scenario 1 |           |              |                |           |              |
| 2010       | 0 [±7]    | 8 [±12]      | 0 [±8]         | 0 [±6]    | 1 [±10]      |
| 2020       | 34 [±23]  | 115 [±40]    | 78 [±26]       | 148 [±18] | 265 [±33]    |
| 2030       | 55 [±32]  | 272 [±56]    | 148 [±36]      | 320 [±26] | 544 [±47]    |
| Scenario 2 |           |              |                |           |              |
| 2010       | 0 [±7]    | 9 [±12]      | 0 [±8]         | 0 [±6]    | 3 [±10]      |
| 2020       | 73 [±23]  | 405 [±40]    | 297 [±26]      | 476 [±18] | 758 [±33]    |
| 2030       | 135 [±32] | 865 [±56]    | 571 [±35]      | 970 [±25] | 1553 [±46]   |

**Table A59. Prevalence cases in year [per 100000] for Finland**

| Year       | Cancers    | CHD & Stroke | Osteoarthritis | Diabetes   | Hypertension |
|------------|------------|--------------|----------------|------------|--------------|
| Scenario 0 |            |              |                |            |              |
| 2010       | 6668 [±23] | 2578 [±14]   | 7456 [±24]     | 3441 [±17] | 15870 [±36]  |
| 2020       | 6013 [±22] | 3230 [±16]   | 7630 [±25]     | 3279 [±16] | 16644 [±37]  |
| 2030       | 5615 [±22] | 3402 [±17]   | 7651 [±26]     | 3449 [±17] | 17250 [±39]  |
| Scenario 1 |            |              |                |            |              |
| 2010       | 6652 [±23] | 2558 [±14]   | 7438 [±24]     | 3432 [±17] | 15847 [±36]  |
| 2020       | 5983 [±22] | 3204 [±16]   | 7564 [±25]     | 3166 [±16] | 16417 [±37]  |
| 2030       | 5590 [±22] | 3375 [±17]   | 7565 [±26]     | 3244 [±17] | 16847 [±38]  |
| Scenario 2 |            |              |                |            |              |
| 2010       | 6652 [±23] | 2565 [±14]   | 7456 [±24]     | 3439 [±17] | 15893 [±36]  |
| 2020       | 5968 [±22] | 3165 [±16]   | 7436 [±25]     | 2951 [±16] | 16104 [±36]  |
| 2030       | 5595 [±22] | 3308 [±17]   | 7340 [±25]     | 2889 [±16] | 16228 [±37]  |

**Table A60. Prevalence cases avoided in year [per 100000] Finland**

| Year       | Cancers  | CHD & Stroke | Osteoarthritis | Diabetes  | Hypertension |
|------------|----------|--------------|----------------|-----------|--------------|
| Scenario 1 |          |              |                |           |              |
| 2010       | 2 [±20]  | 0 [±29]      | 0 [±35]        | 2 [±20]   | 0 [±69]      |
| 2020       | 21 [±22] | 74 [±33]     | 24 [±37]       | 109 [±22] | 215 [±76]    |
| 2030       | 0 [±23]  | 194 [±36]    | 93 [±40]       | 221 [±24] | 474 [±81]    |
| Scenario 2 |          |              |                |           |              |
| 2010       | 0 [±20]  | 0 [±29]      | 0 [±35]        | 0 [±20]   | 0 [±69]      |
| 2020       | 46 [±22] | 380 [±33]    | 224 [±37]      | 371 [±22] | 697 [±75]    |
| 2030       | 55 [±23] | 641 [±35]    | 362 [±39]      | 610 [±23] | 1375 [±81]   |

## France

**Table A61. Cumulative incidence cases from year 2010 [per 100000 of population in 2010] for France**

| Year       | Cancers    | CHD & Stroke | Osteoarthritis | Diabetes   | Hypertension |
|------------|------------|--------------|----------------|------------|--------------|
| Scenario 0 |            |              |                |            |              |
| 2010       | 213 [±4]   | 897 [±8]     | 16 [±1]        | 199 [±4]   | 1353 [±10]   |
| 2020       | 2481 [±14] | 9407 [±28]   | 183 [±4]       | 2426 [±14] | 14376 [±34]  |
| 2030       | 4897 [±20] | 18475 [±39]  | 371 [±6]       | 5114 [±21] | 27688 [±48]  |
| Scenario 1 |            |              |                |            |              |
| 2010       | 214 [±4]   | 907 [±9]     | 17 [±1]        | 201 [±4]   | 1357 [±10]   |
| 2020       | 2446 [±14] | 9289 [±27]   | 181 [±4]       | 2252 [±14] | 14067 [±34]  |
| 2030       | 4835 [±20] | 18148 [±39]  | 362 [±5]       | 4756 [±20] | 27196 [±47]  |
| Scenario 2 |            |              |                |            |              |
| 2010       | 214 [±4]   | 898 [±8]     | 17 [±1]        | 194 [±4]   | 1359 [±10]   |
| 2020       | 2398 [±14] | 8870 [±27]   | 173 [±4]       | 1901 [±12] | 13496 [±33]  |
| 2030       | 4733 [±20] | 17347 [±38]  | 344 [±5]       | 4060 [±18] | 26199 [±47]  |

**Table A62. Cumulative incidence cases avoided from year 2010 [per 100000 of population in 2010] France**

| Year       | Cancers   | CHD & Stroke | Osteoarthritis | Diabetes   | Hypertension |
|------------|-----------|--------------|----------------|------------|--------------|
| Scenario 1 |           |              |                |            |              |
| 2010       | 0 [±6]    | 0 [±12]      | 0 [±2]         | 0 [±6]     | 0 [±15]      |
| 2020       | 35 [±20]  | 118 [±39]    | 2 [±5]         | 174 [±19]  | 309 [±48]    |
| 2030       | 62 [±28]  | 327 [±54]    | 9 [±8]         | 358 [±28]  | 492 [±66]    |
| Scenario 2 |           |              |                |            |              |
| 2010       | 0 [±6]    | -1 [±12]     | -1 [±2]        | 5 [±6]     | -6 [±15]     |
| 2020       | 83 [±20]  | 537 [±38]    | 10 [±5]        | 525 [±19]  | 880 [±47]    |
| 2030       | 164 [±28] | 1128 [±54]   | 27 [±8]        | 1054 [±27] | 1489 [±66]   |

**Table A63. Prevalence cases in year [per 100000] for France**

| Year       | Cancers    | CHD & Stroke | Osteoarthritis | Diabetes   | Hypertension |
|------------|------------|--------------|----------------|------------|--------------|
| Scenario 0 |            |              |                |            |              |
| 2010       | 3932 [±18] | 2481 [±14]   | 404 [±6]       | 3798 [±17] | 51131 [±64]  |
| 2020       | 4111 [±18] | 3091 [±16]   | 402 [±6]       | 3632 [±17] | 53004 [±66]  |
| 2030       | 4267 [±19] | 3386 [±17]   | 424 [±6]       | 4006 [±18] | 54421 [±67]  |
| Scenario 1 |            |              |                |            |              |
| 2010       | 3948 [±18] | 2489 [±14]   | 406 [±6]       | 3821 [±17] | 51165 [±64]  |
| 2020       | 4116 [±18] | 3063 [±16]   | 402 [±6]       | 3514 [±17] | 52787 [±65]  |
| 2030       | 4260 [±19] | 3333 [±17]   | 420 [±6]       | 3807 [±18] | 54116 [±67]  |
| Scenario 2 |            |              |                |            |              |
| 2010       | 3942 [±18] | 2470 [±14]   | 406 [±6]       | 3808 [±17] | 51163 [±64]  |
| 2020       | 4091 [±18] | 2951 [±15]   | 401 [±6]       | 3286 [±16] | 52363 [±65]  |
| 2030       | 4252 [±19] | 3216 [±16]   | 414 [±6]       | 3437 [±17] | 53481 [±66]  |

**Table A64. Prevalence cases avoided in year [per 100000] France**

| Year       | Cancers  | CHD & Stroke | Osteoarthritis | Diabetes  | Hypertension |
|------------|----------|--------------|----------------|-----------|--------------|
| Scenario 1 |          |              |                |           |              |
| 2010       | 0 [±25]  | 0 [±20]      | 0 [±8]         | 0 [±25]   | 0 [±90]      |
| 2020       | 0 [±26]  | 28 [±22]     | 0 [±8]         | 118 [±24] | 217 [±92]    |
| 2030       | 7 [±26]  | 53 [±23]     | 4 [±8]         | 199 [±25] | 305 [±93]    |
| Scenario 2 |          |              |                |           |              |
| 2010       | 0 [±25]  | 11 [±20]     | 0 [±8]         | 0 [±25]   | 0 [±90]      |
| 2020       | 20 [±26] | 140 [±22]    | 1 [±8]         | 346 [±24] | 641 [±92]    |
| 2030       | 15 [±26] | 170 [±23]    | 10 [±8]        | 569 [±24] | 940 [±93]    |

## Georgia

**Table A65. Cumulative incidence cases from year 2010 [per 100000 of population in 2010] for Georgia**

| Year       | Cancers    | CHD & Stroke | Osteoarthritis | Diabetes   | Hypertension |
|------------|------------|--------------|----------------|------------|--------------|
| Scenario 0 |            |              |                |            |              |
| 2010       | 153 [±3]   | 1097 [±9]    | 23 [±1]        | 271 [±5]   | 751 [±8]     |
| 2020       | 1636 [±11] | 9618 [±27]   | 254 [±4]       | 3489 [±16] | 8603 [±25]   |
| 2030       | 3151 [±15] | 17714 [±36]  | 490 [±6]       | 7336 [±23] | 16531 [±35]  |
| Scenario 1 |            |              |                |            |              |
| 2010       | 151 [±3]   | 1109 [±9]    | 23 [±1]        | 269 [±5]   | 742 [±8]     |
| 2020       | 1593 [±11] | 9340 [±26]   | 245 [±4]       | 3076 [±15] | 8183 [±25]   |
| 2030       | 3066 [±15] | 17136 [±35]  | 474 [±6]       | 6680 [±22] | 15890 [±34]  |
| Scenario 2 |            |              |                |            |              |
| 2010       | 154 [±4]   | 1103 [±9]    | 24 [±1]        | 267 [±5]   | 747 [±8]     |
| 2020       | 1551 [±11] | 8802 [±26]   | 235 [±4]       | 2585 [±14] | 7632 [±24]   |
| 2030       | 2965 [±15] | 16146 [±34]  | 456 [±6]       | 5652 [±20] | 14868 [±33]  |

**Table A66. Cumulative incidence cases avoided from year 2010 [per 100000 of population in 2010] for Georgia**

| Year       | Cancers   | CHD & Stroke | Osteoarthritis | Diabetes   | Hypertension |
|------------|-----------|--------------|----------------|------------|--------------|
| Scenario 1 |           |              |                |            |              |
| 2010       | 2 [±5]    | -12 [±13]    | 0 [±2]         | 2 [±7]     | 9 [±11]      |
| 2020       | 43 [±16]  | 278 [±39]    | 9 [±6]         | 413 [±23]  | 420 [±37]    |
| 2030       | 85 [±22]  | 578 [±53]    | 16 [±9]        | 656 [±33]  | 641 [±51]    |
| Scenario 2 |           |              |                |            |              |
| 2010       | -1 [±5]   | -6 [±13]     | -1 [±2]        | 4 [±7]     | 4 [±11]      |
| 2020       | 85 [±16]  | 816 [±38]    | 19 [±6]        | 904 [±22]  | 971 [±36]    |
| 2030       | 186 [±22] | 1568 [±52]   | 34 [±9]        | 1684 [±32] | 1663 [±50]   |

**Table A67. Prevalence cases in year [per 100000] for Georgia**

| Year       | Cancers    | CHD & Stroke | Osteoarthritis | Diabetes   | Hypertension |
|------------|------------|--------------|----------------|------------|--------------|
| Scenario 0 |            |              |                |            |              |
| 2010       | 1102 [±9]  | 1589 [±11]   | 580 [±7]       | 7073 [±24] | 18900 [±39]  |
| 2020       | 1203 [±9]  | 1905 [±12]   | 526 [±6]       | 6279 [±22] | 18204 [±37]  |
| 2030       | 1275 [±10] | 2042 [±12]   | 528 [±6]       | 7123 [±23] | 18758 [±37]  |
| Scenario 1 |            |              |                |            |              |
| 2010       | 1099 [±9]  | 1601 [±11]   | 580 [±7]       | 7097 [±24] | 18902 [±39]  |
| 2020       | 1178 [±9]  | 1844 [±12]   | 519 [±6]       | 5976 [±21] | 17893 [±37]  |
| 2030       | 1235 [±9]  | 1958 [±12]   | 519 [±6]       | 6727 [±22] | 18396 [±36]  |
| Scenario 2 |            |              |                |            |              |
| 2010       | 1107 [±9]  | 1596 [±11]   | 573 [±7]       | 7064 [±24] | 18899 [±39]  |
| 2020       | 1163 [±9]  | 1746 [±11]   | 510 [±6]       | 5652 [±21] | 17547 [±36]  |
| 2030       | 1207 [±9]  | 1860 [±12]   | 508 [±6]       | 6064 [±21] | 17840 [±36]  |

**Table A68. Prevalence cases avoided in year [per 100000] for Georgia**

| Year       | Cancers  | CHD & Stroke | Osteoarthritis | Diabetes   | Hypertension |
|------------|----------|--------------|----------------|------------|--------------|
| Scenario 1 |          |              |                |            |              |
| 2010       | 3 [±13]  | -12 [±16]    | 0 [±10]        | -24 [±34]  | -2 [±55]     |
| 2020       | 25 [±14] | 61 [±17]     | 7 [±9]         | 303 [±31]  | 311 [±54]    |
| 2030       | 40 [±14] | 84 [±18]     | 9 [±9]         | 396 [±33]  | 362 [±55]    |
| Scenario 2 |          |              |                |            |              |
| 2010       | -5 [±13] | -7 [±16]     | 7 [±10]        | 9 [±34]    | 1 [±55]      |
| 2020       | 40 [±14] | 159 [±17]    | 16 [±9]        | 627 [±31]  | 657 [±53]    |
| 2030       | 68 [±14] | 182 [±18]    | 20 [±9]        | 1059 [±32] | 918 [±54]    |

## Germany

**Table A69. Cumulative incidence cases from year 2010 [per 100000 of population in 2010] for Germany**

| Year       | Cancers    | CHD & Stroke | Hypertension | Diabetes   | Osteoarthritis |
|------------|------------|--------------|--------------|------------|----------------|
| Scenario 0 |            |              |              |            |                |
| 2010       | 254 [±5]   | 916 [±9]     | 735 [±8]     | 231 [±4]   | 17 [±1]        |
| 2020       | 3231 [±17] | 11095 [±32]  | 9247 [±29]   | 3227 [±17] | 223 [±5]       |
| 2030       | 7460 [±29] | 25401 [±53]  | 20832 [±48]  | 7816 [±30] | 508 [±8]       |
| Scenario 1 |            |              |              |            |                |
| 2010       | 255 [±5]   | 911 [±9]     | 732 [±8]     | 234 [±4]   | 18 [±1]        |
| 2020       | 3191 [±17] | 10956 [±32]  | 8919 [±29]   | 3022 [±17] | 221 [±5]       |
| 2030       | 7353 [±29] | 25011 [±53]  | 20191 [±48]  | 7361 [±29] | 500 [±7]       |
| Scenario 2 |            |              |              |            |                |
| 2010       | 256 [±5]   | 911 [±9]     | 735 [±8]     | 236 [±4]   | 18 [±1]        |
| 2020       | 3098 [±17] | 10563 [±31]  | 8341 [±28]   | 2568 [±15] | 212 [±4]       |
| 2030       | 7129 [±28] | 24034 [±52]  | 18736 [±46]  | 6285 [±26] | 479 [±7]       |

**Table A70. Cumulative incidence cases avoided from year 2010 [per 100000 of population in 2010] Germany**

| Year       | Cancers   | CHD & Stroke | Hypertension | Diabetes   | Osteoarthritis |
|------------|-----------|--------------|--------------|------------|----------------|
| Scenario 1 |           |              |              |            |                |
| 2010       | 0 [±6]    | 5 [±12]      | 3 [±11]      | 0 [±6]     | 0 [±2]         |
| 2020       | 40 [±23]  | 139 [±42]    | 328 [±38]    | 205 [±22]  | 2 [±6]         |
| 2030       | 107 [±34] | 390 [±64]    | 641 [±57]    | 455 [±35]  | 8 [±9]         |
| Scenario 2 |           |              |              |            |                |
| 2010       | -2 [±6]   | 5 [±12]      | 0 [±11]      | -5 [±6]    | -1 [±2]        |
| 2020       | 133 [±23] | 532 [±42]    | 906 [±38]    | 659 [±22]  | 11 [±6]        |
| 2030       | 331 [±34] | 1367 [±63]   | 2096 [±56]   | 1531 [±34] | 29 [±9]        |

**Table A71. Prevalence cases in year [per 100000] for Germany**

| Year       | Cancers    | CHD & Stroke | Hypertension | Diabetes   | Osteoarthritis |
|------------|------------|--------------|--------------|------------|----------------|
| Scenario 0 |            |              |              |            |                |
| 2010       | 2470 [±14] | 2000 [±13]   | 18474 [±38]  | 3470 [±17] | 448 [±6]       |
| 2020       | 3075 [±17] | 2910 [±16]   | 22003 [±45]  | 3698 [±19] | 497 [±7]       |
| 2030       | 3715 [±20] | 3678 [±20]   | 25940 [±54]  | 4599 [±23] | 581 [±8]       |
| Scenario 1 |            |              |              |            |                |
| 2010       | 2456 [±14] | 2000 [±13]   | 18501 [±38]  | 3483 [±17] | 449 [±6]       |
| 2020       | 3039 [±17] | 2884 [±16]   | 21756 [±45]  | 3574 [±18] | 494 [±7]       |
| 2030       | 3677 [±20] | 3637 [±20]   | 25526 [±54]  | 4395 [±22] | 576 [±8]       |
| Scenario 2 |            |              |              |            |                |
| 2010       | 2471 [±14] | 1994 [±13]   | 18482 [±38]  | 3486 [±17] | 449 [±6]       |
| 2020       | 3000 [±17] | 2834 [±16]   | 21322 [±45]  | 3313 [±18] | 492 [±7]       |
| 2030       | 3616 [±20] | 3551 [±20]   | 24573 [±52]  | 3922 [±21] | 568 [±8]       |

**Table A72. Prevalence cases avoided in year [per 100000] Germany**

| Year       | Cancers  | CHD & Stroke | Hypertension | Diabetes  | Osteoarthritis |
|------------|----------|--------------|--------------|-----------|----------------|
| Scenario 1 |          |              |              |           |                |
| 2010       | 14 [±20] | 0 [±18]      | 0 [±54]      | 0 [±24]   | 0 [±8]         |
| 2020       | 36 [±22] | 26 [±22]     | 247 [±59]    | 124 [±24] | 3 [±9]         |
| 2030       | 38 [±24] | 41 [±24]     | 414 [±64]    | 204 [±27] | 5 [±10]        |
| Scenario 2 |          |              |              |           |                |
| 2010       | 0 [±20]  | 6 [±18]      | 0 [±54]      | -16 [±24] | 0 [±8]         |
| 2020       | 75 [±22] | 76 [±21]     | 681 [±59]    | 385 [±24] | 5 [±9]         |
| 2030       | 99 [±24] | 127 [±24]    | 1367 [±64]   | 677 [±26] | 13 [±10]       |



## Greece

**Table A73. Cumulative incidence cases from year 2010 [per 100000 of population in 2010] for Greece**

| Year       | Cancers    | CHD & Stroke | Diabetes   | Osteoarthritis | Hypertension |
|------------|------------|--------------|------------|----------------|--------------|
| Scenario 0 |            |              |            |                |              |
| 2010       | 126 [±3]   | 949 [±9]     | 299 [±5]   | 19 [±1]        | 717 [±8]     |
| 2020       | 1428 [±11] | 10931 [±30]  | 3280 [±16] | 195 [±4]       | 7819 [±25]   |
| 2030       | 2963 [±16] | 22627 [±45]  | 6463 [±24] | 388 [±6]       | 15138 [±36]  |
| Scenario 1 |            |              |            |                |              |
| 2010       | 126 [±3]   | 950 [±9]     | 297 [±5]   | 18 [±1]        | 719 [±8]     |
| 2020       | 1414 [±11] | 10745 [±30]  | 3095 [±16] | 191 [±4]       | 7632 [±25]   |
| 2030       | 2939 [±16] | 22276 [±44]  | 6093 [±23] | 382 [±6]       | 14756 [±36]  |
| Scenario 2 |            |              |            |                |              |
| 2010       | 126 [±3]   | 959 [±9]     | 297 [±5]   | 17 [±1]        | 707 [±8]     |
| 2020       | 1372 [±11] | 10273 [±29]  | 2562 [±15] | 181 [±4]       | 7048 [±24]   |
| 2030       | 2849 [±16] | 21221 [±43]  | 5040 [±21] | 362 [±6]       | 13537 [±34]  |

**Table A74. Cumulative incidence cases avoided from year 2010 [per 100000 of population in 2010] Greece**

| Year       | Cancers   | CHD & Stroke | Diabetes   | Osteoarthritis | Hypertension |
|------------|-----------|--------------|------------|----------------|--------------|
| Scenario 1 |           |              |            |                |              |
| 2010       | 0 [±4]    | -1 [±12]     | 2 [±7]     | 1 [±2]         | -2 [±11]     |
| 2020       | 14 [±15]  | 186 [±42]    | 185 [±23]  | 4 [±6]         | 187 [±35]    |
| 2030       | 24 [±22]  | 351 [±60]    | 370 [±32]  | 6 [±8]         | 382 [±49]    |
| Scenario 2 |           |              |            |                |              |
| 2010       | 0 [±4]    | -10 [±12]    | 2 [±7]     | 2 [±2]         | 10 [±11]     |
| 2020       | 56 [±15]  | 658 [±41]    | 718 [±22]  | 14 [±5]        | 771 [±34]    |
| 2030       | 114 [±22] | 1406 [±59]   | 1423 [±30] | 26 [±8]        | 1601 [±48]   |

**Table A75. Prevalence cases in year [per 100000] for Greece**

| Year       | Cancers    | CHD & Stroke | Diabetes   | Osteoarthritis | Hypertension |
|------------|------------|--------------|------------|----------------|--------------|
| Scenario 0 |            |              |            |                |              |
| 2010       | 1190 [±10] | 9256 [±27]   | 6262 [±22] | 422 [±6]       | 17636 [±38]  |
| 2020       | 1350 [±11] | 9998 [±29]   | 6913 [±24] | 449 [±6]       | 19669 [±40]  |
| 2030       | 1499 [±11] | 11292 [±31]  | 7373 [±25] | 482 [±7]       | 21197 [±43]  |
| Scenario 1 |            |              |            |                |              |
| 2010       | 1192 [±10] | 9263 [±27]   | 6250 [±22] | 418 [±6]       | 17646 [±38]  |
| 2020       | 1348 [±11] | 9930 [±29]   | 6763 [±24] | 443 [±6]       | 19531 [±40]  |
| 2030       | 1491 [±11] | 11169 [±31]  | 7112 [±25] | 476 [±6]       | 20904 [±43]  |
| Scenario 2 |            |              |            |                |              |
| 2010       | 1201 [±10] | 9255 [±27]   | 6237 [±22] | 413 [±6]       | 17635 [±38]  |
| 2020       | 1331 [±10] | 9656 [±28]   | 6326 [±23] | 437 [±6]       | 19038 [±40]  |
| 2030       | 1475 [±11] | 10751 [±31]  | 6404 [±24] | 469 [±6]       | 19972 [±42]  |

**Table A76. Prevalence cases avoided in year [per 100000] Greece**

| Year       | Cancers   | CHD & Stroke | Diabetes  | Osteoarthritis | Hypertension |
|------------|-----------|--------------|-----------|----------------|--------------|
| Scenario 1 |           |              |           |                |              |
| 2010       | -2 [±14]  | -7 [±38]     | 12 [±32]  | 4 [±8]         | -10 [±53]    |
| 2020       | 2 [±15]   | 68 [±40]     | 150 [±33] | 6 [±8]         | 138 [±56]    |
| 2030       | 8 [±15]   | 123 [±42]    | 261 [±34] | 6 [±9]         | 293 [±58]    |
| Scenario 2 |           |              |           |                |              |
| 2010       | -11 [±14] | 1 [±38]      | 25 [±32]  | 9 [±8]         | 1 [±53]      |
| 2020       | 19 [±15]  | 342 [±40]    | 587 [±33] | 12 [±8]        | 631 [±56]    |
| 2030       | 24 [±15]  | 541 [±42]    | 969 [±33] | 13 [±9]        | 1225 [±57]   |

## Hungary

Table A77. Cumulative Incidence cases in year [per 100,000 of population in 2010] for Hungary

| Year       | Cancers           | CHD & Stroke       | Osteoarthritis  | Diabetes          | Hypertension       |
|------------|-------------------|--------------------|-----------------|-------------------|--------------------|
| Scenario 0 |                   |                    |                 |                   |                    |
| 2010       | 237 [ $\pm 4$ ]   | 1685 [ $\pm 12$ ]  | 18 [ $\pm 1$ ]  | 225 [ $\pm 4$ ]   | 706 [ $\pm 8$ ]    |
| 2020       | 2573 [ $\pm 15$ ] | 15174 [ $\pm 37$ ] | 205 [ $\pm 4$ ] | 2519 [ $\pm 15$ ] | 8023 [ $\pm 27$ ]  |
| 2030       | 5126 [ $\pm 22$ ] | 28877 [ $\pm 53$ ] | 407 [ $\pm 6$ ] | 5011 [ $\pm 22$ ] | 16029 [ $\pm 40$ ] |
| Scenario 1 |                   |                    |                 |                   |                    |
| 2010       | 236 [ $\pm 4$ ]   | 1698 [ $\pm 12$ ]  | 18 [ $\pm 1$ ]  | 228 [ $\pm 4$ ]   | 707 [ $\pm 8$ ]    |
| 2020       | 2543 [ $\pm 15$ ] | 15035 [ $\pm 36$ ] | 200 [ $\pm 4$ ] | 2389 [ $\pm 15$ ] | 7817 [ $\pm 26$ ]  |
| 2030       | 5056 [ $\pm 22$ ] | 28528 [ $\pm 53$ ] | 398 [ $\pm 6$ ] | 4690 [ $\pm 21$ ] | 15616 [ $\pm 39$ ] |
| Scenario 2 |                   |                    |                 |                   |                    |
| 2010       | 235 [ $\pm 4$ ]   | 1684 [ $\pm 12$ ]  | 18 [ $\pm 1$ ]  | 230 [ $\pm 4$ ]   | 714 [ $\pm 8$ ]    |
| 2020       | 2460 [ $\pm 15$ ] | 14355 [ $\pm 36$ ] | 186 [ $\pm 4$ ] | 1961 [ $\pm 13$ ] | 7235 [ $\pm 25$ ]  |
| 2030       | 4917 [ $\pm 22$ ] | 27265 [ $\pm 51$ ] | 368 [ $\pm 6$ ] | 3842 [ $\pm 19$ ] | 14358 [ $\pm 37$ ] |

Table A78. Cumulative incidence cases avoided from year 2010 [per 100000 of population in 2010] Hungary

| Year       | Cancers          | CHD & Stroke      | Osteoarthritis | Diabetes          | Hypertension      |
|------------|------------------|-------------------|----------------|-------------------|-------------------|
| Scenario 1 |                  |                   |                |                   |                   |
| 2010       | 1 [ $\pm 6$ ]    | -13 [ $\pm 16$ ]  | 0 [ $\pm 2$ ]  | -3 [ $\pm 6$ ]    | -1 [ $\pm 11$ ]   |
| 2020       | 30 [ $\pm 20$ ]  | 139 [ $\pm 49$ ]  | 5 [ $\pm 6$ ]  | 130 [ $\pm 20$ ]  | 206 [ $\pm 36$ ]  |
| 2030       | 70 [ $\pm 29$ ]  | 349 [ $\pm 68$ ]  | 9 [ $\pm 8$ ]  | 321 [ $\pm 28$ ]  | 413 [ $\pm 50$ ]  |
| Scenario 2 |                  |                   |                |                   |                   |
| 2010       | 2 [ $\pm 6$ ]    | 1 [ $\pm 16$ ]    | 0 [ $\pm 2$ ]  | -5 [ $\pm 6$ ]    | -8 [ $\pm 11$ ]   |
| 2020       | 113 [ $\pm 20$ ] | 819 [ $\pm 49$ ]  | 19 [ $\pm 6$ ] | 558 [ $\pm 19$ ]  | 788 [ $\pm 35$ ]  |
| 2030       | 209 [ $\pm 28$ ] | 1612 [ $\pm 67$ ] | 39 [ $\pm 8$ ] | 1169 [ $\pm 27$ ] | 1671 [ $\pm 49$ ] |

**Table A79. Prevalence cases from year 2010 [per 100,000] for Hungary**

| Year       | Cancers    | CHD & Stroke | Osteoarthritis | Diabetes   | Hypertension |
|------------|------------|--------------|----------------|------------|--------------|
| Scenario 0 |            |              |                |            |              |
| 2010       | 1417 [±11] | 3477 [±17]   | 401 [±6]       | 6077 [±22] | 16584 [±36]  |
| 2020       | 1465 [±11] | 3433 [±17]   | 361 [±6]       | 5182 [±21] | 16272 [±38]  |
| 2030       | 1517 [±12] | 3453 [±18]   | 366 [±6]       | 5187 [±23] | 16708 [±40]  |
| Scenario 1 |            |              |                |            |              |
| 2010       | 1406 [±11] | 3483 [±17]   | 399 [±6]       | 6076 [±22] | 16594 [±36]  |
| 2020       | 1447 [±11] | 3406 [±17]   | 357 [±6]       | 5099 [±21] | 16131 [±38]  |
| 2030       | 1497 [±12] | 3414 [±18]   | 361 [±6]       | 4982 [±22] | 16466 [±40]  |
| Scenario 2 |            |              |                |            |              |
| 2010       | 1411 [±11] | 3474 [±17]   | 392 [±6]       | 6074 [±22] | 16610 [±36]  |
| 2020       | 1425 [±11] | 3307 [±17]   | 345 [±6]       | 4833 [±21] | 15803 [±37]  |
| 2030       | 1473 [±12] | 3319 [±18]   | 343 [±6]       | 4503 [±21] | 15757 [±39]  |

**Table A80. Prevalence cases avoided in year [per 100,000] Hungary**

| Year       | Cancers  | CHD & Stroke | Osteoarthritis | Diabetes  | Hypertension |
|------------|----------|--------------|----------------|-----------|--------------|
| Scenario 1 |          |              |                |           |              |
| 2010       | 11 [±15] | -6 [±24]     | 2 [±8]         | 1 [±31]   | -10 [±52]    |
| 2020       | 18 [±15] | 27 [±23]     | 4 [±8]         | 83 [±29]  | 141 [±51]    |
| 2030       | 20 [±16] | 39 [±23]     | 5 [±8]         | 205 [±29] | 242 [±52]    |
| Scenario 2 |          |              |                |           |              |
| 2010       | 6 [±15]  | 3 [±24]      | 9 [±8]         | 3 [±31]   | -26 [±52]    |
| 2020       | 40 [±15] | 126 [±23]    | 16 [±8]        | 349 [±28] | 469 [±51]    |
| 2030       | 44 [±15] | 134 [±23]    | 23 [±8]        | 684 [±28] | 951 [±51]    |

## Iceland

**Table A81. Cumulative incidence cases from year 2010 [per 100000 of population in 2010] for Iceland**

| Year       | Cancers    | CHD & Stroke | Osteoarthritis | Diabetes   | Hypertension |
|------------|------------|--------------|----------------|------------|--------------|
| Scenario 0 |            |              |                |            |              |
| 2010       | 188 [±4]   | 477 [±6]     | 221 [±4]       | 247 [±4]   | 642 [±7]     |
| 2020       | 2179 [±13] | 5779 [±21]   | 2606 [±14]     | 2958 [±15] | 7255 [±23]   |
| 2030       | 4365 [±18] | 12239 [±30]  | 5240 [±19]     | 6155 [±21] | 14491 [±32]  |
| Scenario 1 |            |              |                |            |              |
| 2010       | 185 [±4]   | 473 [±6]     | 214 [±4]       | 251 [±4]   | 645 [±7]     |
| 2020       | 2147 [±13] | 5656 [±21]   | 2545 [±14]     | 2722 [±14] | 6961 [±23]   |
| 2030       | 4292 [±18] | 11964 [±29]  | 5126 [±19]     | 5647 [±20] | 13905 [±32]  |
| Scenario 2 |            |              |                |            |              |
| 2010       | 188 [±4]   | 484 [±6]     | 220 [±4]       | 250 [±4]   | 651 [±7]     |
| 2020       | 2090 [±12] | 5384 [±20]   | 2392 [±13]     | 2268 [±13] | 6446 [±22]   |
| 2030       | 4143 [±17] | 11306 [±28]  | 4858 [±19]     | 4771 [±18] | 12925 [±30]  |

**Table A82. Cumulative incidence cases avoided from year 2010 [per 100000 of population in 2010] for Iceland**

| Year       | Cancers   | CHD & Stroke | Osteoarthritis | Diabetes   | Hypertension |
|------------|-----------|--------------|----------------|------------|--------------|
| Scenario 1 |           |              |                |            |              |
| 2010       | 3 [±5]    | 4 [±9]       | 7 [±6]         | -4 [±6]    | -3 [±10]     |
| 2020       | 32 [±19]  | 123 [±30]    | 61 [±20]       | 236 [±21]  | 294 [±34]    |
| 2030       | 73 [±26]  | 275 [±44]    | 114 [±29]      | 508 [±31]  | 586 [±48]    |
| Scenario 2 |           |              |                |            |              |
| 2010       | 0 [±5]    | -7 [±9]      | 1 [±6]         | -3 [±6]    | -9 [±10]     |
| 2020       | 89 [±18]  | 395 [±30]    | 214 [±20]      | 690 [±20]  | 809 [±33]    |
| 2030       | 222 [±26] | 933 [±43]    | 382 [±28]      | 1384 [±30] | 1566 [±47]   |

**Table A83. Prevalence cases in year [per 100000] for Iceland**

| Year       | Cancers    | CHD & Stroke | Osteoarthritis | Diabetes   | Hypertension |
|------------|------------|--------------|----------------|------------|--------------|
| Scenario 0 |            |              |                |            |              |
| 2010       | 2301 [±14] | 3481 [±17]   | 4478 [±19]     | 4954 [±20] | 13289 [±33]  |
| 2020       | 2628 [±14] | 4620 [±19]   | 5201 [±20]     | 6395 [±22] | 16250 [±35]  |
| 2030       | 2873 [±14] | 5770 [±20]   | 5992 [±21]     | 7794 [±24] | 18871 [±37]  |
| Scenario 1 |            |              |                |            |              |
| 2010       | 2292 [±14] | 3487 [±17]   | 4505 [±19]     | 4950 [±20] | 13279 [±33]  |
| 2020       | 2599 [±14] | 4538 [±18]   | 5174 [±20]     | 6177 [±21] | 15967 [±35]  |
| 2030       | 2842 [±14] | 5636 [±20]   | 5934 [±21]     | 7361 [±23] | 18382 [±36]  |
| Scenario 2 |            |              |                |            |              |
| 2010       | 2293 [±14] | 3482 [±17]   | 4484 [±19]     | 4975 [±20] | 13299 [±33]  |
| 2020       | 2578 [±14] | 4337 [±18]   | 5026 [±19]     | 5787 [±21] | 15525 [±34]  |
| 2030       | 2795 [±14] | 5279 [±19]   | 5735 [±20]     | 6658 [±22] | 17618 [±35]  |

**Table A84. Prevalence cases avoided in year [per 100000] for Iceland**

| Year       | Cancers  | CHD & Stroke | Osteoarthritis | Diabetes   | Hypertension |
|------------|----------|--------------|----------------|------------|--------------|
| Scenario 1 |          |              |                |            |              |
| 2010       | 9 [±19]  | -6 [±24]     | -27 [±27]      | 4 [±28]    | 10 [±46]     |
| 2020       | 29 [±20] | 82 [±27]     | 27 [±29]       | 218 [±32]  | 283 [±51]    |
| 2030       | 31 [±21] | 134 [±30]    | 58 [±31]       | 433 [±35]  | 489 [±55]    |
| Scenario 2 |          |              |                |            |              |
| 2010       | 8 [±19]  | -1 [±24]     | -6 [±27]       | -21 [±28]  | -10 [±46]    |
| 2020       | 50 [±20] | 283 [±27]    | 175 [±29]      | 608 [±31]  | 725 [±50]    |
| 2030       | 78 [±21] | 491 [±30]    | 257 [±31]      | 1136 [±34] | 1253 [±54]   |

## Ireland

**Table A85. Cumulative incidence cases from year 2010 [per 100000 of population in 2010] for Ireland**

| Year       | Cancers           | CHD & Stroke       | Osteoarthritis   | Diabetes          | Hypertension       |
|------------|-------------------|--------------------|------------------|-------------------|--------------------|
| Scenario 0 |                   |                    |                  |                   |                    |
| 2010       | 252 [ $\pm 4$ ]   | 525 [ $\pm 6$ ]    | 42 [ $\pm 2$ ]   | 137 [ $\pm 3$ ]   | 913 [ $\pm 9$ ]    |
| 2020       | 3038 [ $\pm 15$ ] | 5913 [ $\pm 21$ ]  | 508 [ $\pm 6$ ]  | 1650 [ $\pm 11$ ] | 10638 [ $\pm 29$ ] |
| 2030       | 6450 [ $\pm 22$ ] | 12134 [ $\pm 31$ ] | 1041 [ $\pm 9$ ] | 3568 [ $\pm 17$ ] | 21499 [ $\pm 41$ ] |
| Scenario 1 |                   |                    |                  |                   |                    |
| 2010       | 254 [ $\pm 5$ ]   | 521 [ $\pm 6$ ]    | 43 [ $\pm 2$ ]   | 134 [ $\pm 3$ ]   | 916 [ $\pm 9$ ]    |
| 2020       | 2948 [ $\pm 15$ ] | 5801 [ $\pm 21$ ]  | 499 [ $\pm 6$ ]  | 1535 [ $\pm 11$ ] | 10199 [ $\pm 28$ ] |
| 2030       | 6291 [ $\pm 22$ ] | 11893 [ $\pm 30$ ] | 1021 [ $\pm 9$ ] | 3324 [ $\pm 16$ ] | 20675 [ $\pm 40$ ] |
| Scenario 2 |                   |                    |                  |                   |                    |
| 2010       | 249 [ $\pm 4$ ]   | 524 [ $\pm 6$ ]    | 44 [ $\pm 2$ ]   | 139 [ $\pm 3$ ]   | 916 [ $\pm 9$ ]    |
| 2020       | 2803 [ $\pm 15$ ] | 5534 [ $\pm 21$ ]  | 466 [ $\pm 6$ ]  | 1268 [ $\pm 10$ ] | 9499 [ $\pm 27$ ]  |
| 2030       | 5997 [ $\pm 21$ ] | 11329 [ $\pm 29$ ] | 957 [ $\pm 9$ ]  | 2745 [ $\pm 14$ ] | 19360 [ $\pm 38$ ] |

**Table A86. Cumulative incidence cases avoided from year 2010 [per 100000 of population in 2010] Ireland**

| Year       | Cancers          | CHD & Stroke     | Osteoarthritis  | Diabetes         | Hypertension      |
|------------|------------------|------------------|-----------------|------------------|-------------------|
| Scenario 1 |                  |                  |                 |                  |                   |
| 2010       | -2 [ $\pm 6$ ]   | 4 [ $\pm 9$ ]    | -1 [ $\pm 3$ ]  | 3 [ $\pm 5$ ]    | -3 [ $\pm 12$ ]   |
| 2020       | 90 [ $\pm 22$ ]  | 112 [ $\pm 31$ ] | 9 [ $\pm 9$ ]   | 115 [ $\pm 16$ ] | 439 [ $\pm 41$ ]  |
| 2030       | 159 [ $\pm 32$ ] | 241 [ $\pm 44$ ] | 20 [ $\pm 13$ ] | 244 [ $\pm 23$ ] | 824 [ $\pm 58$ ]  |
| Scenario 2 |                  |                  |                 |                  |                   |
| 2010       | 3 [ $\pm 6$ ]    | 1 [ $\pm 9$ ]    | -2 [ $\pm 3$ ]  | -2 [ $\pm 5$ ]   | -3 [ $\pm 12$ ]   |
| 2020       | 235 [ $\pm 22$ ] | 379 [ $\pm 30$ ] | 42 [ $\pm 9$ ]  | 382 [ $\pm 15$ ] | 1139 [ $\pm 40$ ] |
| 2030       | 453 [ $\pm 32$ ] | 805 [ $\pm 43$ ] | 84 [ $\pm 13$ ] | 823 [ $\pm 22$ ] | 2139 [ $\pm 57$ ] |

**Table A87. Prevalence cases in year [per 100000] for Ireland**

| Year       | Cancers    | CHD & Stroke | Osteoarthritis | Diabetes   | Hypertension |
|------------|------------|--------------|----------------|------------|--------------|
| Scenario 0 |            |              |                |            |              |
| 2010       | 1346 [±10] | 770 [±8]     | 873 [±8]       | 2742 [±15] | 21728 [±42]  |
| 2020       | 1798 [±12] | 1300 [±10]   | 962 [±9]       | 2845 [±15] | 24392 [±43]  |
| 2030       | 2173 [±13] | 1519 [±11]   | 1083 [±9]      | 3327 [±16] | 27156 [±46]  |
| Scenario 1 |            |              |                |            |              |
| 2010       | 1356 [±10] | 765 [±8]     | 874 [±8]       | 2738 [±15] | 21742 [±42]  |
| 2020       | 1767 [±12] | 1280 [±10]   | 958 [±9]       | 2752 [±15] | 24048 [±43]  |
| 2030       | 2142 [±13] | 1495 [±11]   | 1076 [±9]      | 3150 [±16] | 26566 [±45]  |
| Scenario 2 |            |              |                |            |              |
| 2010       | 1350 [±10] | 763 [±8]     | 873 [±8]       | 2752 [±15] | 21740 [±42]  |
| 2020       | 1705 [±11] | 1220 [±10]   | 932 [±8]       | 2547 [±14] | 23511 [±42]  |
| 2030       | 2079 [±13] | 1428 [±10]   | 1035 [±9]      | 2744 [±14] | 25706 [±44]  |

**Table A88. Prevalence cases avoided in year [per 100000] Ireland**

| Year       | Cancers   | CHD & Stroke | Osteoarthritis | Diabetes  | Hypertension |
|------------|-----------|--------------|----------------|-----------|--------------|
| Scenario 1 |           |              |                |           |              |
| 2010       | -10 [±15] | 5 [±11]      | -1 [±12]       | 4 [±21]   | -14 [±59]    |
| 2020       | 31 [±17]  | 20 [±14]     | 4 [±12]        | 93 [±21]  | 344 [±62]    |
| 2030       | 31 [±19]  | 24 [±16]     | 7 [±13]        | 177 [±23] | 590 [±66]    |
| Scenario 2 |           |              |                |           |              |
| 2010       | -4 [±15]  | 7 [±11]      | 0 [±12]        | -10 [±21] | -12 [±59]    |
| 2020       | 93 [±17]  | 80 [±14]     | 30 [±12]       | 298 [±21] | 881 [±62]    |
| 2030       | 94 [±18]  | 91 [±15]     | 48 [±13]       | 583 [±22] | 1450 [±65]   |



## Israel

**Table A89. Cumulative incidence cases from year 2010 [per 100000 of population in 2010] for Israel**

| Year       | Cancers    | CHD & Stroke | Osteoarthritis | Diabetes   | Hypertension |
|------------|------------|--------------|----------------|------------|--------------|
| Scenario 0 |            |              |                |            |              |
| 2010       | 191 [±4]   | 668 [±7]     | 12 [±1]        | 214 [±4]   | 547 [±7]     |
| 2020       | 2013 [±12] | 6272 [±21]   | 127 [±3]       | 2017 [±12] | 5508 [±20]   |
| 2030       | 3668 [±16] | 10879 [±27]  | 229 [±4]       | 3600 [±16] | 10131 [±26]  |
| Scenario 1 |            |              |                |            |              |
| 2010       | 192 [±4]   | 670 [±7]     | 11 [±1]        | 213 [±4]   | 547 [±7]     |
| 2020       | 1997 [±12] | 6223 [±21]   | 126 [±3]       | 1912 [±12] | 5463 [±20]   |
| 2030       | 3643 [±16] | 10737 [±27]  | 225 [±4]       | 3395 [±15] | 10032 [±26]  |
| Scenario 2 |            |              |                |            |              |
| 2010       | 190 [±4]   | 666 [±7]     | 12 [±1]        | 214 [±4]   | 544 [±7]     |
| 2020       | 1950 [±12] | 5887 [±21]   | 120 [±3]       | 1627 [±11] | 5314 [±20]   |
| 2030       | 3553 [±15] | 10174 [±26]  | 214 [±4]       | 2890 [±14] | 9769 [±26]   |

**Table A90. Cumulative incidence cases avoided from year 2010 [per 100000 of population in 2010] for Israel**

| Year       | Cancers   | CHD & Stroke | Diabetes  | Hypertension | Osteoarthritis |
|------------|-----------|--------------|-----------|--------------|----------------|
| Scenario 1 |           |              |           |              |                |
| 2010       | -1 [±6]   | -2 [±10]     | 1 [±6]    | 0 [±9]       | 1 [±1]         |
| 2020       | 16 [±18]  | 49 [±32]     | 105 [±18] | 45 [±30]     | 1 [±4]         |
| 2030       | 25 [±24]  | 142 [±42]    | 205 [±24] | 99 [±40]     | 4 [±6]         |
| Scenario 2 |           |              |           |              |                |
| 2010       | 1 [±6]    | 2 [±10]      | 0 [±6]    | 3 [±9]       | 0 [±1]         |
| 2020       | 63 [±18]  | 385 [±31]    | 390 [±17] | 194 [±29]    | 7 [±4]         |
| 2030       | 115 [±24] | 705 [±41]    | 710 [±23] | 362 [±40]    | 15 [±6]        |

**Table A91. Prevalence cases in year [per 100000] for Israel**

| Year       | Cancers    | CHD & Stroke | Osteoarthritis | Diabetes   | Hypertension |
|------------|------------|--------------|----------------|------------|--------------|
| Scenario 0 |            |              |                |            |              |
| 2010       | 1597 [±11] | 1900 [±12]   | 278 [±5]       | 4189 [±18] | 11908 [±31]  |
| 2020       | 1728 [±11] | 2143 [±13]   | 261 [±4]       | 3601 [±16] | 11767 [±29]  |
| 2030       | 1751 [±11] | 2085 [±12]   | 260 [±4]       | 3410 [±15] | 11832 [±28]  |
| Scenario 1 |            |              |                |            |              |
| 2010       | 1602 [±11] | 1903 [±12]   | 278 [±5]       | 4205 [±18] | 11902 [±31]  |
| 2020       | 1725 [±11] | 2136 [±13]   | 259 [±4]       | 3536 [±16] | 11719 [±29]  |
| 2030       | 1744 [±11] | 2049 [±12]   | 256 [±4]       | 3275 [±15] | 11774 [±28]  |
| Scenario 2 |            |              |                |            |              |
| 2010       | 1607 [±11] | 1894 [±12]   | 275 [±5]       | 4183 [±18] | 11855 [±31]  |
| 2020       | 1706 [±11] | 2044 [±12]   | 254 [±4]       | 3335 [±16] | 11655 [±29]  |
| 2030       | 1733 [±11] | 1971 [±11]   | 252 [±4]       | 2984 [±14] | 11699 [±28]  |

**Table A92. Prevalence cases avoided in year [per 100000] for Israel**

| Year       | Cancers  | CHD & Stroke | Diabetes  | Hypertension | Osteoarthritis |
|------------|----------|--------------|-----------|--------------|----------------|
| Scenario 1 |          |              |           |              |                |
| 2010       | 5 [±16]  | -1 [±11]     | -9 [±27]  | -5 [±44]     | -4 [±7]        |
| 2020       | 14 [±17] | 8 [±13]      | 67 [±24]  | 54 [±44]     | -2 [±6]        |
| 2030       | 11 [±17] | 18 [±12]     | 139 [±24] | 68 [±44]     | 1 [±7]         |
| Scenario 2 |          |              |           |              |                |
| 2010       | 7 [±16]  | -6 [±11]     | -10 [±27] | 40 [±44]     | -3 [±7]        |
| 2020       | 29 [±17] | 68 [±12]     | 262 [±24] | 139 [±44]    | 6 [±6]         |
| 2030       | 19 [±17] | 78 [±12]     | 442 [±23] | 155 [±44]    | 13 [±6]        |

## Italy

**Table A93. Cumulative incidence cases from year 2010 [per 100000 of population in 2010] for Italy**

| Year       | Cancers    | CHD & Stroke | Diabetes   | Osteoarthritis | Hypertension |
|------------|------------|--------------|------------|----------------|--------------|
| Scenario 0 |            |              |            |                |              |
| 2010       | 246 [±4]   | 1095 [±9]    | 236 [±4]   | 17 [±1]        | 746 [±8]     |
| 2020       | 2869 [±16] | 11269 [±31]  | 2733 [±15] | 202 [±4]       | 8253 [±27]   |
| 2030       | 5919 [±24] | 22213 [±46]  | 5518 [±23] | 410 [±6]       | 16310 [±39]  |
| Scenario 1 |            |              |            |                |              |
| 2010       | 246 [±4]   | 1097 [±9]    | 237 [±4]   | 18 [±1]        | 748 [±8]     |
| 2020       | 2845 [±16] | 11119 [±31]  | 2550 [±15] | 196 [±4]       | 8047 [±26]   |
| 2030       | 5861 [±23] | 21865 [±45]  | 5142 [±22] | 398 [±6]       | 15836 [±38]  |
| Scenario 2 |            |              |            |                |              |
| 2010       | 245 [±4]   | 1091 [±9]    | 235 [±4]   | 18 [±1]        | 743 [±8]     |
| 2020       | 2748 [±15] | 10644 [±30]  | 2099 [±13] | 187 [±4]       | 7405 [±25]   |
| 2030       | 5651 [±23] | 20873 [±44]  | 4222 [±20] | 376 [±6]       | 14479 [±37]  |

**Table A94. Cumulative incidence cases avoided from year 2010 [per 100000 of population in 2010] Italy**

| Year       | Cancers   | CHD & Stroke | Diabetes   | Osteoarthritis | Hypertension |
|------------|-----------|--------------|------------|----------------|--------------|
| Scenario 1 |           |              |            |                |              |
| 2010       | 0 [±6]    | -2 [±13]     | -1 [±6]    | -1 [±2]        | -2 [±11]     |
| 2020       | 24 [±21]  | 150 [±42]    | 183 [±21]  | 6 [±6]         | 206 [±36]    |
| 2030       | 58 [±31]  | 348 [±59]    | 376 [±29]  | 12 [±8]        | 474 [±51]    |
| Scenario 2 |           |              |            |                |              |
| 2010       | 1 [±6]    | 4 [±13]      | 1 [±6]     | -1 [±2]        | 3 [±11]      |
| 2020       | 121 [±21] | 625 [±42]    | 634 [±20]  | 15 [±6]        | 848 [±35]    |
| 2030       | 268 [±30] | 1340 [±59]   | 1296 [±28] | 34 [±8]        | 1831 [±50]   |

**Table A95. Prevalence cases in year [per 100000] for Italy**

| Year       | Cancers    | CHD & Stroke | Diabetes   | Osteoarthritis | Hypertension |
|------------|------------|--------------|------------|----------------|--------------|
| Scenario 0 |            |              |            |                |              |
| 2010       | 2560 [±14] | 2885 [±15]   | 5845 [±22] | 447 [±6]       | 18448 [±38]  |
| 2020       | 2830 [±16] | 3417 [±17]   | 5791 [±22] | 450 [±6]       | 19563 [±41]  |
| 2030       | 3043 [±17] | 3728 [±19]   | 6040 [±24] | 472 [±7]       | 20547 [±44]  |
| Scenario 1 |            |              |            |                |              |
| 2010       | 2569 [±14] | 2877 [±15]   | 5828 [±22] | 450 [±6]       | 18441 [±38]  |
| 2020       | 2806 [±16] | 3372 [±17]   | 5640 [±22] | 442 [±6]       | 19409 [±41]  |
| 2030       | 3011 [±17] | 3663 [±18]   | 5772 [±23] | 462 [±7]       | 20218 [±43]  |
| Scenario 2 |            |              |            |                |              |
| 2010       | 2560 [±14] | 2877 [±15]   | 5853 [±22] | 455 [±6]       | 18432 [±38]  |
| 2020       | 2767 [±15] | 3286 [±17]   | 5343 [±21] | 438 [±6]       | 18960 [±40]  |
| 2030       | 2966 [±17] | 3529 [±18]   | 5211 [±22] | 453 [±6]       | 19354 [±42]  |

**Table A96. Prevalence cases avoided in year [per 100000] Italy**

| Year       | Cancers  | CHD & Stroke | Diabetes  | Osteoarthritis | Hypertension |
|------------|----------|--------------|-----------|----------------|--------------|
| Scenario 1 |          |              |           |                |              |
| 2010       | -9 [±20] | 8 [±21]      | 17 [±31]  | -3 [±8]        | 7 [±54]      |
| 2020       | 24 [±21] | 45 [±23]     | 151 [±30] | 8 [±8]         | 154 [±56]    |
| 2030       | 32 [±22] | 65 [±24]     | 268 [±31] | 10 [±9]        | 329 [±57]    |
| Scenario 2 |          |              |           |                |              |
| 2010       | 0 [±20]  | 8 [±21]      | -8 [±31]  | -8 [±8]        | 16 [±54]     |
| 2020       | 63 [±21] | 131 [±23]    | 448 [±30] | 12 [±8]        | 603 [±56]    |
| 2030       | 77 [±22] | 199 [±24]    | 829 [±30] | 19 [±9]        | 1193 [±56]   |

## Kazakhstan

**Table A97. Cumulative incidence cases from year 2010 [per 100000 of population in 2010] for Kazakhstan**

| Year       | Cancers           | CHD & Stroke       | Osteoarthritis  | Diabetes          | Hypertension       |
|------------|-------------------|--------------------|-----------------|-------------------|--------------------|
| Scenario 0 |                   |                    |                 |                   |                    |
| 2010       | 101 [ $\pm 3$ ]   | 2532 [ $\pm 14$ ]  | 12 [ $\pm 1$ ]  | 257 [ $\pm 5$ ]   | 667 [ $\pm 7$ ]    |
| 2020       | 1044 [ $\pm 9$ ]  | 18107 [ $\pm 38$ ] | 132 [ $\pm 3$ ] | 2965 [ $\pm 15$ ] | 6710 [ $\pm 23$ ]  |
| 2030       | 1986 [ $\pm 13$ ] | 31143 [ $\pm 50$ ] | 246 [ $\pm 4$ ] | 6231 [ $\pm 22$ ] | 13355 [ $\pm 33$ ] |
| Scenario 1 |                   |                    |                 |                   |                    |
| 2010       | 99 [ $\pm 3$ ]    | 2527 [ $\pm 14$ ]  | 11 [ $\pm 1$ ]  | 261 [ $\pm 5$ ]   | 675 [ $\pm 7$ ]    |
| 2020       | 1039 [ $\pm 9$ ]  | 17899 [ $\pm 38$ ] | 128 [ $\pm 3$ ] | 2782 [ $\pm 15$ ] | 6503 [ $\pm 23$ ]  |
| 2030       | 1972 [ $\pm 13$ ] | 30782 [ $\pm 50$ ] | 242 [ $\pm 4$ ] | 5910 [ $\pm 22$ ] | 12847 [ $\pm 32$ ] |
| Scenario 2 |                   |                    |                 |                   |                    |
| 2010       | 100 [ $\pm 3$ ]   | 2528 [ $\pm 14$ ]  | 13 [ $\pm 1$ ]  | 257 [ $\pm 5$ ]   | 670 [ $\pm 7$ ]    |
| 2020       | 998 [ $\pm 9$ ]   | 17434 [ $\pm 37$ ] | 121 [ $\pm 3$ ] | 2409 [ $\pm 14$ ] | 5827 [ $\pm 22$ ]  |
| 2030       | 1896 [ $\pm 12$ ] | 29971 [ $\pm 49$ ] | 232 [ $\pm 4$ ] | 5057 [ $\pm 20$ ] | 11505 [ $\pm 30$ ] |

**Table A98. Cumulative incidence cases avoided from year 2010 [per 100000 of population in 2010] for Kazakhstan**

| Year       | Cancers         | CHD & Stroke      | Osteoarthritis | Diabetes          | Hypertension      |
|------------|-----------------|-------------------|----------------|-------------------|-------------------|
| Scenario 1 |                 |                   |                |                   |                   |
| 2010       | 2 [ $\pm 4$ ]   | 5 [ $\pm 20$ ]    | 1 [ $\pm 1$ ]  | -4 [ $\pm 6$ ]    | -8 [ $\pm 10$ ]   |
| 2020       | 5 [ $\pm 13$ ]  | 208 [ $\pm 54$ ]  | 4 [ $\pm 5$ ]  | 183 [ $\pm 21$ ]  | 207 [ $\pm 33$ ]  |
| 2030       | 14 [ $\pm 18$ ] | 361 [ $\pm 70$ ]  | 4 [ $\pm 6$ ]  | 321 [ $\pm 31$ ]  | 508 [ $\pm 46$ ]  |
| Scenario 2 |                 |                   |                |                   |                   |
| 2010       | 1 [ $\pm 4$ ]   | 4 [ $\pm 20$ ]    | -1 [ $\pm 1$ ] | 0 [ $\pm 6$ ]     | -3 [ $\pm 10$ ]   |
| 2020       | 46 [ $\pm 13$ ] | 673 [ $\pm 53$ ]  | 11 [ $\pm 4$ ] | 556 [ $\pm 21$ ]  | 883 [ $\pm 32$ ]  |
| 2030       | 90 [ $\pm 18$ ] | 1172 [ $\pm 70$ ] | 14 [ $\pm 6$ ] | 1174 [ $\pm 30$ ] | 1850 [ $\pm 45$ ] |

**Table A99. Prevalence cases in year [per 100000] for Kazakhstan**

| Year       | Cancers  | CHD & Stroke | Osteoarthritis | Diabetes   | Hypertension |
|------------|----------|--------------|----------------|------------|--------------|
| Scenario 0 |          |              |                |            |              |
| 2010       | 402 [±6] | 6484 [±23]   | 243 [±4]       | 4527 [±19] | 11972 [±31]  |
| 2020       | 437 [±6] | 6014 [±22]   | 199 [±4]       | 4820 [±20] | 12084 [±31]  |
| 2030       | 462 [±6] | 6021 [±22]   | 201 [±4]       | 5810 [±22] | 13681 [±33]  |
| Scenario 1 |          |              |                |            |              |
| 2010       | 397 [±6] | 6469 [±23]   | 247 [±4]       | 4535 [±19] | 11947 [±31]  |
| 2020       | 437 [±6] | 5970 [±22]   | 197 [±4]       | 4687 [±19] | 11924 [±31]  |
| 2030       | 463 [±6] | 5987 [±22]   | 200 [±4]       | 5643 [±21] | 13384 [±33]  |
| Scenario 2 |          |              |                |            |              |
| 2010       | 404 [±6] | 6476 [±23]   | 244 [±4]       | 4538 [±19] | 12007 [±31]  |
| 2020       | 425 [±6] | 5859 [±22]   | 193 [±4]       | 4423 [±19] | 11525 [±30]  |
| 2030       | 448 [±6] | 5877 [±22]   | 194 [±4]       | 5069 [±20] | 12606 [±32]  |

**Table A100. Prevalence cases avoided in year [per 100000] for Kazakhstan**

| Year       | Cancers | CHD & Stroke | Osteoarthritis | Diabetes  | Hypertension |
|------------|---------|--------------|----------------|-----------|--------------|
| Scenario 1 |         |              |                |           |              |
| 2010       | 5 [±8]  | 15 [±32]     | -4 [±6]        | -8 [±27]  | 25 [±44]     |
| 2020       | 0 [±8]  | 44 [±31]     | 2 [±6]         | 133 [±28] | 160 [±44]    |
| 2030       | -1 [±9] | 34 [±31]     | 1 [±6]         | 167 [±30] | 297 [±47]    |
| Scenario 2 |         |              |                |           |              |
| 2010       | -2 [±8] | 8 [±32]      | -1 [±6]        | -11 [±27] | -35 [±44]    |
| 2020       | 12 [±8] | 155 [±31]    | 6 [±6]         | 397 [±27] | 559 [±43]    |
| 2030       | 14 [±9] | 144 [±31]    | 7 [±6]         | 741 [±30] | 1075 [±46]   |

## Kyrgyzstan

**Table A101. Cumulative incidence cases from year 2010 [per 100000 of population in 2010] for Kyrgyzstan**

| Year       | Cancers   | CHD & Stroke | Osteoarthritis | Diabetes   | Hypertension |
|------------|-----------|--------------|----------------|------------|--------------|
| Scenario 0 |           |              |                |            |              |
| 2010       | 66 [±2]   | 1637 [±11]   | 9 [±1]         | 212 [±4]   | 411 [±6]     |
| 2020       | 656 [±7]  | 12239 [±30]  | 101 [±3]       | 2258 [±13] | 4426 [±18]   |
| 2030       | 1214 [±9] | 20914 [±38]  | 190 [±4]       | 4037 [±17] | 8387 [±24]   |
| Scenario 1 |           |              |                |            |              |
| 2010       | 62 [±2]   | 1640 [±11]   | 9 [±1]         | 209 [±4]   | 409 [±6]     |
| 2020       | 644 [±7]  | 12117 [±30]  | 98 [±3]        | 2148 [±13] | 4331 [±18]   |
| 2030       | 1194 [±9] | 20708 [±37]  | 186 [±4]       | 3867 [±16] | 8252 [±24]   |
| Scenario 2 |           |              |                |            |              |
| 2010       | 64 [±2]   | 1643 [±11]   | 9 [±1]         | 209 [±4]   | 413 [±6]     |
| 2020       | 636 [±7]  | 11863 [±30]  | 95 [±3]        | 1910 [±12] | 4141 [±17]   |
| 2030       | 1175 [±9] | 20300 [±37]  | 176 [±3]       | 3409 [±15] | 7855 [±23]   |

**Table A102. Cumulative incidence cases avoided from year 2010 [per 100000 of population in 2010] for Kyrgyzstan**

| Year       | Cancers  | CHD & Stroke | Osteoarthritis | Diabetes  | Hypertension |
|------------|----------|--------------|----------------|-----------|--------------|
| Scenario 1 |          |              |                |           |              |
| 2010       | 0 [±3]   | 5 [±16]      | 0 [±1]         | 1 [±6]    | -4 [±8]      |
| 2020       | 4 [±10]  | 227 [±45]    | 2 [±4]         | 130 [±20] | 116 [±27]    |
| 2030       | 13 [±14] | 280 [±59]    | 3 [±6]         | 222 [±28] | 168 [±38]    |
| Scenario 2 |          |              |                |           |              |
| 2010       | -1 [±3]  | 12 [±16]     | 0 [±1]         | 1 [±6]    | -5 [±8]      |
| 2020       | 25 [±10] | 602 [±44]    | 7 [±4]         | 470 [±19] | 365 [±27]    |
| 2030       | 53 [±14] | 859 [±59]    | 13 [±6]        | 865 [±27] | 644 [±37]    |

**Table A103. Prevalence cases in year [per 100000] for Kyrgyzstan**

| Year       | Cancers  | CHD & Stroke | Osteoarthritis | Diabetes   | Hypertension |
|------------|----------|--------------|----------------|------------|--------------|
| Scenario 0 |          |              |                |            |              |
| 2010       | 304 [±5] | 4239 [±18]   | 175 [±4]       | 3479 [±17] | 9006 [±27]   |
| 2020       | 334 [±5] | 4522 [±18]   | 155 [±3]       | 3782 [±17] | 9483 [±26]   |
| 2030       | 353 [±5] | 4676 [±18]   | 166 [±3]       | 4029 [±17] | 10217 [±26]  |
| Scenario 1 |          |              |                |            |              |
| 2010       | 302 [±5] | 4255 [±18]   | 174 [±4]       | 3494 [±17] | 9005 [±27]   |
| 2020       | 333 [±5] | 4487 [±18]   | 153 [±3]       | 3705 [±17] | 9409 [±26]   |
| 2030       | 350 [±5] | 4656 [±18]   | 164 [±3]       | 3942 [±16] | 10145 [±26]  |
| Scenario 2 |          |              |                |            |              |
| 2010       | 298 [±5] | 4251 [±18]   | 169 [±4]       | 3504 [±17] | 9024 [±27]   |
| 2020       | 326 [±5] | 4427 [±18]   | 150 [±3]       | 3531 [±16] | 9290 [±26]   |
| 2030       | 349 [±5] | 4572 [±18]   | 155 [±3]       | 3647 [±16] | 9876 [±26]   |

**Table A104. Prevalence cases avoided in year [per 100000] for Kyrgyzstan**

| Year       | Cancers | CHD & Stroke | Osteoarthritis | Diabetes  | Hypertension |
|------------|---------|--------------|----------------|-----------|--------------|
| Scenario 1 |         |              |                |           |              |
| 2010       | 2 [±7]  | -16 [±26]    | 1 [±5]         | -15 [±24] | 1 [±38]      |
| 2020       | 1 [±7]  | 35 [±27]     | 2 [±5]         | 77 [±24]  | 74 [±39]     |
| 2030       | 3 [±7]  | 20 [±27]     | 2 [±5]         | 87 [±25]  | 72 [±40]     |
| Scenario 2 |         |              |                |           |              |
| 2010       | 6 [±7]  | -12 [±26]    | 6 [±5]         | -25 [±24] | -18 [±38]    |
| 2020       | 8 [±7]  | 95 [±27]     | 5 [±5]         | 251 [±24] | 193 [±39]    |
| 2030       | 4 [±7]  | 104 [±27]    | 11 [±5]        | 382 [±25] | 341 [±40]    |



## Latvia

**Table A105. Cumulative incidence cases from year 2010 [per 100,000 of population in 2010] for Latvia**

| Year       | Cancers           | CHD & Stroke       | Osteoarthritis  | Diabetes          | Hypertension       |
|------------|-------------------|--------------------|-----------------|-------------------|--------------------|
| Scenario 0 |                   |                    |                 |                   |                    |
| 2010       | 143 [ $\pm 3$ ]   | 1918 [ $\pm 12$ ]  | 16 [ $\pm 1$ ]  | 242 [ $\pm 4$ ]   | 656 [ $\pm 7$ ]    |
| 2020       | 1738 [ $\pm 13$ ] | 19994 [ $\pm 45$ ] | 199 [ $\pm 4$ ] | 3349 [ $\pm 18$ ] | 8959 [ $\pm 30$ ]  |
| 2030       | 3976 [ $\pm 23$ ] | 44170 [ $\pm 76$ ] | 460 [ $\pm 8$ ] | 7977 [ $\pm 32$ ] | 21728 [ $\pm 53$ ] |
| Scenario 1 |                   |                    |                 |                   |                    |
| 2010       | 142 [ $\pm 3$ ]   | 1917 [ $\pm 12$ ]  | 15 [ $\pm 1$ ]  | 243 [ $\pm 4$ ]   | 646 [ $\pm 7$ ]    |
| 2020       | 1703 [ $\pm 13$ ] | 19665 [ $\pm 45$ ] | 194 [ $\pm 4$ ] | 3084 [ $\pm 18$ ] | 8697 [ $\pm 30$ ]  |
| 2030       | 3900 [ $\pm 23$ ] | 43389 [ $\pm 75$ ] | 447 [ $\pm 8$ ] | 7355 [ $\pm 31$ ] | 21082 [ $\pm 52$ ] |
| Scenario 2 |                   |                    |                 |                   |                    |
| 2010       | 141 [ $\pm 3$ ]   | 1920 [ $\pm 12$ ]  | 15 [ $\pm 1$ ]  | 241 [ $\pm 4$ ]   | 649 [ $\pm 7$ ]    |
| 2020       | 1632 [ $\pm 13$ ] | 18814 [ $\pm 43$ ] | 178 [ $\pm 4$ ] | 2522 [ $\pm 16$ ] | 7987 [ $\pm 28$ ]  |
| 2030       | 3772 [ $\pm 22$ ] | 41434 [ $\pm 73$ ] | 413 [ $\pm 7$ ] | 6013 [ $\pm 28$ ] | 19291 [ $\pm 50$ ] |

**Table A106. Cumulative incidence cases avoided from year 2010 [per 100,000 of population in 2010] Latvia**

| Year       | Cancers          | CHD & Stroke      | Osteoarthritis | Diabetes          | Hypertension      |
|------------|------------------|-------------------|----------------|-------------------|-------------------|
| Scenario 1 |                  |                   |                |                   |                   |
| 2010       | 1 [ $\pm 5$ ]    | 1 [ $\pm 18$ ]    | 1 [ $\pm 2$ ]  | -1 [ $\pm 6$ ]    | 10 [ $\pm 10$ ]   |
| 2020       | 35 [ $\pm 17$ ]  | 329 [ $\pm 56$ ]  | 5 [ $\pm 6$ ]  | 265 [ $\pm 23$ ]  | 262 [ $\pm 38$ ]  |
| 2030       | 76 [ $\pm 25$ ]  | 781 [ $\pm 84$ ]  | 13 [ $\pm 9$ ] | 622 [ $\pm 35$ ]  | 646 [ $\pm 59$ ]  |
| Scenario 2 |                  |                   |                |                   |                   |
| 2010       | 2 [ $\pm 5$ ]    | -2 [ $\pm 18$ ]   | 1 [ $\pm 2$ ]  | 1 [ $\pm 6$ ]     | 7 [ $\pm 10$ ]    |
| 2020       | 106 [ $\pm 16$ ] | 1180 [ $\pm 56$ ] | 21 [ $\pm 5$ ] | 827 [ $\pm 22$ ]  | 972 [ $\pm 37$ ]  |
| 2030       | 204 [ $\pm 25$ ] | 2736 [ $\pm 83$ ] | 47 [ $\pm 8$ ] | 1964 [ $\pm 33$ ] | 2437 [ $\pm 57$ ] |

**Table A107. Prevalence cases in year [per 100,000] for Latvia**

| Year       | Cancers    | CHD & Stroke | Osteoarthritis | Diabetes   | Hypertension |
|------------|------------|--------------|----------------|------------|--------------|
| Scenario 0 |            |              |                |            |              |
| 2010       | 817 [±8]   | 3989 [±18]   | 310 [±5]       | 5910 [±22] | 14809 [±34]  |
| 2020       | 909 [±10]  | 4440 [±21]   | 306 [±6]       | 5858 [±24] | 16043 [±40]  |
| 2030       | 1064 [±12] | 5192 [±26]   | 354 [±7]       | 7129 [±31] | 19764 [±51]  |
| Scenario 1 |            |              |                |            |              |
| 2010       | 818 [±8]   | 3984 [±18]   | 313 [±5]       | 5909 [±22] | 14791 [±34]  |
| 2020       | 893 [±9]   | 4368 [±21]   | 304 [±6]       | 5670 [±24] | 15861 [±40]  |
| 2030       | 1054 [±12] | 5107 [±26]   | 350 [±7]       | 6729 [±30] | 19420 [±50]  |
| Scenario 2 |            |              |                |            |              |
| 2010       | 813 [±8]   | 3989 [±18]   | 309 [±5]       | 5910 [±22] | 14788 [±34]  |
| 2020       | 877 [±9]   | 4270 [±21]   | 293 [±5]       | 5305 [±23] | 15472 [±39]  |
| 2030       | 1041 [±12] | 4947 [±25]   | 336 [±7]       | 5954 [±28] | 18447 [±49]  |

**Table A108. Prevalence cases avoided in year [per 100,000] Latvia**

| Year       | Cancers  | CHD & Stroke | Osteoarthritis | Diabetes   | Hypertension |
|------------|----------|--------------|----------------|------------|--------------|
| Scenario 1 |          |              |                |            |              |
| 2010       | -1 [±11] | 5 [±25]      | -3 [±7]        | 1 [±31]    | 18 [±49]     |
| 2020       | 16 [±12] | 72 [±27]     | 2 [±7]         | 188 [±30]  | 182 [±51]    |
| 2030       | 10 [±13] | 85 [±29]     | 4 [±8]         | 400 [±33]  | 344 [±56]    |
| Scenario 2 |          |              |                |            |              |
| 2010       | 4 [±11]  | 0 [±25]      | 1 [±7]         | 0 [±31]    | 21 [±49]     |
| 2020       | 32 [±12] | 170 [±26]    | 13 [±7]        | 553 [±30]  | 571 [±50]    |
| 2030       | 23 [±13] | 245 [±28]    | 18 [±7]        | 1175 [±32] | 1317 [±55]   |

## Lithuania

**Table A109. Cumulative incidence cases from year 2010 [per 100000 of population in 2010] for Lithuania**

| Year       | Cancers    | CHD & Stroke | Osteoarthritis | Diabetes   | Hypertension |
|------------|------------|--------------|----------------|------------|--------------|
| Scenario 0 |            |              |                |            |              |
| 2010       | 147 [±3]   | 588 [±7]     | 17 [±1]        | 239 [±4]   | 665 [±7]     |
| 2020       | 1718 [±12] | 6465 [±23]   | 196 [±4]       | 2635 [±15] | 7481 [±25]   |
| 2030       | 3498 [±18] | 12873 [±34]  | 394 [±6]       | 4912 [±21] | 15020 [±37]  |
| Scenario 1 |            |              |                |            |              |
| 2010       | 151 [±3]   | 593 [±7]     | 16 [±1]        | 239 [±4]   | 657 [±7]     |
| 2020       | 1707 [±12] | 6420 [±23]   | 191 [±4]       | 2489 [±14] | 7304 [±25]   |
| 2030       | 3469 [±18] | 12739 [±34]  | 387 [±6]       | 4625 [±20] | 14656 [±36]  |
| Scenario 2 |            |              |                |            |              |
| 2010       | 153 [±3]   | 585 [±7]     | 17 [±1]        | 244 [±4]   | 666 [±7]     |
| 2020       | 1655 [±12] | 6174 [±23]   | 177 [±4]       | 2057 [±13] | 6770 [±24]   |
| 2030       | 3364 [±17] | 12217 [±33]  | 361 [±6]       | 3807 [±19] | 13481 [±35]  |

**Table A110. Cumulative incidence cases avoided from year 2010 [per 100000 of population in 2010] Lithuania**

| Year       | Cancers   | CHD & Stroke | Osteoarthritis | Diabetes   | Hypertension |
|------------|-----------|--------------|----------------|------------|--------------|
| Scenario 1 |           |              |                |            |              |
| 2010       | -4 [±5]   | -5 [±10]     | 1 [±2]         | 0 [±6]     | 8 [±10]      |
| 2020       | 11 [±17]  | 45 [±32]     | 5 [±6]         | 146 [±20]  | 177 [±34]    |
| 2030       | 29 [±24]  | 134 [±45]    | 7 [±8]         | 287 [±28]  | 364 [±49]    |
| Scenario 2 |           |              |                |            |              |
| 2010       | -6 [±5]   | 3 [±10]      | 0 [±2]         | -5 [±6]    | -1 [±10]     |
| 2020       | 63 [±16]  | 291 [±32]    | 19 [±5]        | 578 [±19]  | 711 [±34]    |
| 2030       | 134 [±23] | 656 [±45]    | 33 [±8]        | 1105 [±26] | 1539 [±48]   |

**Table A111. Prevalence cases in year [per 100000] for Lithuania**

| Year       | Cancers    | CHD & Stroke | Osteoarthritis | Diabetes   | Hypertension |
|------------|------------|--------------|----------------|------------|--------------|
| Scenario 0 |            |              |                |            |              |
| 2010       | 929 [±9]   | 1881 [±12]   | 374 [±5]       | 6588 [±23] | 16489 [±36]  |
| 2020       | 1108 [±10] | 2338 [±14]   | 389 [±6]       | 6692 [±24] | 17528 [±38]  |
| 2030       | 1195 [±10] | 2516 [±15]   | 406 [±6]       | 6530 [±24] | 18358 [±41]  |
| Scenario 1 |            |              |                |            |              |
| 2010       | 923 [±9]   | 1889 [±12]   | 374 [±5]       | 6591 [±23] | 16479 [±36]  |
| 2020       | 1093 [±10] | 2319 [±14]   | 382 [±6]       | 6579 [±24] | 17377 [±38]  |
| 2030       | 1177 [±10] | 2471 [±15]   | 401 [±6]       | 6328 [±24] | 18095 [±41]  |
| Scenario 2 |            |              |                |            |              |
| 2010       | 929 [±9]   | 1870 [±12]   | 374 [±5]       | 6560 [±23] | 16513 [±36]  |
| 2020       | 1076 [±10] | 2244 [±14]   | 374 [±6]       | 6213 [±23] | 16986 [±38]  |
| 2030       | 1152 [±10] | 2363 [±15]   | 389 [±6]       | 5751 [±23] | 17266 [±40]  |

**Table A112. Prevalence cases avoided in year [per 100000] Lithuania**

| Year       | Cancers  | CHD & Stroke | Osteoarthritis | Diabetes  | Hypertension |
|------------|----------|--------------|----------------|-----------|--------------|
| Scenario 1 |          |              |                |           |              |
| 2010       | 6 [±12]  | -8 [±17]     | 0 [±8]         | -3 [±32]  | 10 [±51]     |
| 2020       | 15 [±13] | 19 [±19]     | 7 [±8]         | 113 [±33] | 151 [±53]    |
| 2030       | 18 [±14] | 45 [±20]     | 5 [±8]         | 202 [±32] | 263 [±54]    |
| Scenario 2 |          |              |                |           |              |
| 2010       | 0 [±12]  | 11 [±17]     | 0 [±8]         | 28 [±32]  | -24 [±51]    |
| 2020       | 32 [±13] | 94 [±19]     | 15 [±8]        | 479 [±32] | 542 [±53]    |
| 2030       | 43 [±14] | 153 [±20]    | 17 [±8]        | 779 [±31] | 1092 [±53]   |

## Luxembourg

**Table A113. Cumulative incidence cases from year 2010 [per 100000 of population in 2010] for Luxembourg**

| Year       | Cancers           | CHD & Stroke       | Osteoarthritis  | Diabetes          | Hypertension       |
|------------|-------------------|--------------------|-----------------|-------------------|--------------------|
| Scenario 0 |                   |                    |                 |                   |                    |
| 2010       | 216 [ $\pm 4$ ]   | 687 [ $\pm 7$ ]    | 15 [ $\pm 1$ ]  | 130 [ $\pm 3$ ]   | 1166 [ $\pm 10$ ]  |
| 2020       | 2498 [ $\pm 14$ ] | 7826 [ $\pm 25$ ]  | 180 [ $\pm 4$ ] | 1578 [ $\pm 11$ ] | 12432 [ $\pm 32$ ] |
| 2030       | 5223 [ $\pm 21$ ] | 16397 [ $\pm 37$ ] | 368 [ $\pm 5$ ] | 3344 [ $\pm 17$ ] | 24431 [ $\pm 45$ ] |
| Scenario 1 |                   |                    |                 |                   |                    |
| 2010       | 211 [ $\pm 4$ ]   | 682 [ $\pm 7$ ]    | 16 [ $\pm 1$ ]  | 134 [ $\pm 3$ ]   | 1165 [ $\pm 10$ ]  |
| 2020       | 2452 [ $\pm 14$ ] | 7655 [ $\pm 25$ ]  | 178 [ $\pm 4$ ] | 1473 [ $\pm 11$ ] | 12066 [ $\pm 31$ ] |
| 2030       | 5129 [ $\pm 20$ ] | 16013 [ $\pm 36$ ] | 366 [ $\pm 5$ ] | 3118 [ $\pm 16$ ] | 23747 [ $\pm 44$ ] |
| Scenario 2 |                   |                    |                 |                   |                    |
| 2010       | 214 [ $\pm 4$ ]   | 686 [ $\pm 7$ ]    | 15 [ $\pm 1$ ]  | 131 [ $\pm 3$ ]   | 1155 [ $\pm 10$ ]  |
| 2020       | 2388 [ $\pm 14$ ] | 7308 [ $\pm 24$ ]  | 168 [ $\pm 4$ ] | 1211 [ $\pm 10$ ] | 11300 [ $\pm 30$ ] |
| 2030       | 4978 [ $\pm 20$ ] | 15270 [ $\pm 35$ ] | 344 [ $\pm 5$ ] | 2601 [ $\pm 15$ ] | 22311 [ $\pm 43$ ] |

**Table A114. Cumulative incidence cases avoided from year 2010 [per 100000 of population in 2010] Luxembourg**

| Year       | Cancers          | CHD & Stroke      | Osteoarthritis | Diabetes         | Hypertension      |
|------------|------------------|-------------------|----------------|------------------|-------------------|
| Scenario 1 |                  |                   |                |                  |                   |
| 2010       | 5 [ $\pm 6$ ]    | 5 [ $\pm 10$ ]    | 0 [ $\pm 2$ ]  | 0 [ $\pm 5$ ]    | 1 [ $\pm 14$ ]    |
| 2020       | 46 [ $\pm 20$ ]  | 171 [ $\pm 35$ ]  | 2 [ $\pm 5$ ]  | 105 [ $\pm 16$ ] | 366 [ $\pm 44$ ]  |
| 2030       | 94 [ $\pm 29$ ]  | 384 [ $\pm 51$ ]  | 2 [ $\pm 8$ ]  | 226 [ $\pm 23$ ] | 684 [ $\pm 62$ ]  |
| Scenario 2 |                  |                   |                |                  |                   |
| 2010       | 2 [ $\pm 6$ ]    | 1 [ $\pm 10$ ]    | 0 [ $\pm 2$ ]  | 0 [ $\pm 5$ ]    | 11 [ $\pm 14$ ]   |
| 2020       | 110 [ $\pm 20$ ] | 518 [ $\pm 35$ ]  | 12 [ $\pm 5$ ] | 367 [ $\pm 15$ ] | 1132 [ $\pm 44$ ] |
| 2030       | 245 [ $\pm 29$ ] | 1127 [ $\pm 50$ ] | 24 [ $\pm 8$ ] | 743 [ $\pm 22$ ] | 2120 [ $\pm 61$ ] |

**Table A115. Prevalence cases in year [per 100000] for Luxembourg**

| Year       | Cancers    | CHD & Stroke | Osteoarthritis | Diabetes   | Hypertension |
|------------|------------|--------------|----------------|------------|--------------|
| Scenario 0 |            |              |                |            |              |
| 2010       | 1996 [±13] | 2750 [±15]   | 353 [±5]       | 1773 [±12] | 28536 [±48]  |
| 2020       | 2345 [±14] | 3492 [±17]   | 386 [±6]       | 2091 [±13] | 31884 [±50]  |
| 2030       | 2648 [±15] | 4267 [±19]   | 429 [±6]       | 2492 [±14] | 34618 [±53]  |
| Scenario 1 |            |              |                |            |              |
| 2010       | 1999 [±13] | 2755 [±15]   | 350 [±5]       | 1777 [±12] | 28530 [±48]  |
| 2020       | 2315 [±14] | 3433 [±17]   | 378 [±5]       | 2012 [±13] | 31561 [±50]  |
| 2030       | 2619 [±15] | 4153 [±18]   | 428 [±6]       | 2348 [±14] | 34098 [±53]  |
| Scenario 2 |            |              |                |            |              |
| 2010       | 2005 [±13] | 2765 [±15]   | 347 [±5]       | 1778 [±12] | 28530 [±48]  |
| 2020       | 2286 [±14] | 3296 [±16]   | 371 [±5]       | 1823 [±12] | 30960 [±50]  |
| 2030       | 2582 [±15] | 3962 [±18]   | 413 [±6]       | 2059 [±13] | 33109 [±52]  |

**Table A116. Prevalence cases avoided in year [per 100000] Luxembourg**

| Year       | Cancers  | CHD & Stroke | Osteoarthritis | Diabetes  | Hypertension |
|------------|----------|--------------|----------------|-----------|--------------|
| Scenario 1 |          |              |                |           |              |
| 2010       | 0 [±18]  | 0 [±21]      | 3 [±7]         | 0 [±17]   | 6 [±68]      |
| 2020       | 30 [±19] | 59 [±24]     | 8 [±8]         | 79 [±18]  | 323 [±71]    |
| 2030       | 29 [±21] | 114 [±26]    | 1 [±8]         | 144 [±20] | 520 [±74]    |
| Scenario 2 |          |              |                |           |              |
| 2010       | 0 [±18]  | 0 [±21]      | 6 [±7]         | 0 [±17]   | 6 [±68]      |
| 2020       | 59 [±19] | 196 [±23]    | 15 [±8]        | 268 [±18] | 924 [±71]    |
| 2030       | 66 [±20] | 305 [±26]    | 16 [±8]        | 433 [±19] | 1509 [±74]   |

## Malta

**Table A117. Cumulative incidence cases from year 2010 [per 100000 of population in 2010] for Malta**

| Year       | Cancers           | CHD & Stroke       | Diabetes          | Osteoarthritis  | Hypertension       |
|------------|-------------------|--------------------|-------------------|-----------------|--------------------|
| Scenario 0 |                   |                    |                   |                 |                    |
| 2010       | 183 [ $\pm 4$ ]   | 726 [ $\pm 8$ ]    | 227 [ $\pm 4$ ]   | 17 [ $\pm 1$ ]  | 682 [ $\pm 7$ ]    |
| 2020       | 2157 [ $\pm 13$ ] | 8884 [ $\pm 27$ ]  | 2521 [ $\pm 14$ ] | 194 [ $\pm 4$ ] | 8078 [ $\pm 26$ ]  |
| 2030       | 4447 [ $\pm 20$ ] | 19356 [ $\pm 41$ ] | 5243 [ $\pm 21$ ] | 404 [ $\pm 6$ ] | 16937 [ $\pm 38$ ] |
| Scenario 1 |                   |                    |                   |                 |                    |
| 2010       | 180 [ $\pm 4$ ]   | 724 [ $\pm 8$ ]    | 225 [ $\pm 4$ ]   | 17 [ $\pm 1$ ]  | 691 [ $\pm 7$ ]    |
| 2020       | 2133 [ $\pm 13$ ] | 8696 [ $\pm 27$ ]  | 2369 [ $\pm 14$ ] | 191 [ $\pm 4$ ] | 7829 [ $\pm 25$ ]  |
| 2030       | 4401 [ $\pm 20$ ] | 19017 [ $\pm 41$ ] | 4929 [ $\pm 21$ ] | 397 [ $\pm 6$ ] | 16469 [ $\pm 38$ ] |
| Scenario 2 |                   |                    |                   |                 |                    |
| 2010       | 187 [ $\pm 4$ ]   | 729 [ $\pm 8$ ]    | 230 [ $\pm 4$ ]   | 17 [ $\pm 1$ ]  | 688 [ $\pm 7$ ]    |
| 2020       | 2066 [ $\pm 13$ ] | 8289 [ $\pm 26$ ]  | 1967 [ $\pm 13$ ] | 176 [ $\pm 4$ ] | 7192 [ $\pm 24$ ]  |
| 2030       | 4258 [ $\pm 19$ ] | 18103 [ $\pm 40$ ] | 4099 [ $\pm 19$ ] | 369 [ $\pm 6$ ] | 15208 [ $\pm 36$ ] |

**Table A118. Cumulative incidence cases avoided from year 2010 [per 100000 of population in 2010] Malta**

| Year       | Cancers          | CHD & Stroke      | Diabetes          | Osteoarthritis | Hypertension      |
|------------|------------------|-------------------|-------------------|----------------|-------------------|
| Scenario 1 |                  |                   |                   |                |                   |
| 2010       | 3 [ $\pm 5$ ]    | 2 [ $\pm 11$ ]    | 2 [ $\pm 6$ ]     | 0 [ $\pm 2$ ]  | -9 [ $\pm 10$ ]   |
| 2020       | 24 [ $\pm 19$ ]  | 188 [ $\pm 38$ ]  | 152 [ $\pm 20$ ]  | 3 [ $\pm 6$ ]  | 249 [ $\pm 36$ ]  |
| 2030       | 46 [ $\pm 27$ ]  | 339 [ $\pm 55$ ]  | 314 [ $\pm 29$ ]  | 7 [ $\pm 8$ ]  | 468 [ $\pm 52$ ]  |
| Scenario 2 |                  |                   |                   |                |                   |
| 2010       | -4 [ $\pm 5$ ]   | -3 [ $\pm 11$ ]   | -3 [ $\pm 6$ ]    | 0 [ $\pm 2$ ]  | -6 [ $\pm 10$ ]   |
| 2020       | 91 [ $\pm 18$ ]  | 595 [ $\pm 37$ ]  | 554 [ $\pm 19$ ]  | 18 [ $\pm 5$ ] | 886 [ $\pm 35$ ]  |
| 2030       | 189 [ $\pm 26$ ] | 1253 [ $\pm 55$ ] | 1144 [ $\pm 27$ ] | 35 [ $\pm 8$ ] | 1729 [ $\pm 51$ ] |

**Table A119. Prevalence cases in year [per 100000] for Malta**

| Year       | Cancers    | CHD & Stroke | Diabetes   | Osteoarthritis | Hypertension |
|------------|------------|--------------|------------|----------------|--------------|
| Scenario 0 |            |              |            |                |              |
| 2010       | 1490 [±11] | 3077 [±16]   | 6691 [±23] | 380 [±6]       | 15627 [±35]  |
| 2020       | 1831 [±12] | 4189 [±19]   | 7386 [±25] | 417 [±6]       | 18245 [±39]  |
| 2030       | 2000 [±13] | 4945 [±21]   | 7964 [±26] | 462 [±6]       | 20580 [±42]  |
| Scenario 1 |            |              |            |                |              |
| 2010       | 1490 [±11] | 3071 [±16]   | 6683 [±23] | 378 [±5]       | 15648 [±35]  |
| 2020       | 1820 [±12] | 4105 [±18]   | 7255 [±24] | 415 [±6]       | 18067 [±38]  |
| 2030       | 1977 [±13] | 4854 [±21]   | 7712 [±26] | 460 [±6]       | 20274 [±42]  |
| Scenario 2 |            |              |            |                |              |
| 2010       | 1496 [±11] | 3075 [±16]   | 6703 [±23] | 386 [±6]       | 15646 [±35]  |
| 2020       | 1783 [±12] | 3948 [±18]   | 6921 [±24] | 409 [±6]       | 17541 [±38]  |
| 2030       | 1925 [±13] | 4616 [±20]   | 7057 [±25] | 444 [±6]       | 19388 [±41]  |

**Table A120. Prevalence cases avoided in year [per 100000] Malta**

| Year       | Cancers  | CHD & Stroke | Diabetes  | Osteoarthritis | Hypertension |
|------------|----------|--------------|-----------|----------------|--------------|
| Scenario 1 |          |              |           |                |              |
| 2010       | 0 [±15]  | 6 [±22]      | 8 [±33]   | 2 [±8]         | -21 [±50]    |
| 2020       | 11 [±17] | 84 [±26]     | 131 [±34] | 2 [±8]         | 178 [±54]    |
| 2030       | 23 [±18] | 91 [±28]     | 252 [±35] | 2 [±9]         | 306 [±57]    |
| Scenario 2 |          |              |           |                |              |
| 2010       | -6 [±15] | 2 [±22]      | -12 [±33] | -6 [±8]        | -19 [±50]    |
| 2020       | 48 [±17] | 241 [±26]    | 465 [±34] | 8 [±8]         | 704 [±54]    |
| 2030       | 75 [±18] | 329 [±28]    | 907 [±35] | 18 [±9]        | 1192 [±57]   |



## Monaco

**Table A121. Cumulative incidence cases from year 2010 [per 100000 of population in 2010] for Monaco**

| Year       | Cancers    | CHD & Stroke | Osteoarthritis | Diabetes   | Hypertension |
|------------|------------|--------------|----------------|------------|--------------|
| Scenario 0 |            |              |                |            |              |
| 2010       | 237 [±4]   | 1305 [±10]   | 18 [±1]        | 230 [±4]   | 1237 [±10]   |
| 2020       | 2797 [±16] | 13904 [±35]  | 220 [±4]       | 2894 [±16] | 13547 [±35]  |
| 2030       | 5670 [±24] | 26778 [±51]  | 452 [±7]       | 6144 [±24] | 27373 [±52]  |
| Scenario 1 |            |              |                |            |              |
| 2010       | 238 [±4]   | 1307 [±10]   | 19 [±1]        | 231 [±4]   | 1227 [±10]   |
| 2020       | 2751 [±16] | 13677 [±35]  | 219 [±4]       | 2702 [±15] | 13247 [±34]  |
| 2030       | 5576 [±23] | 26245 [±51]  | 451 [±7]       | 5724 [±24] | 26825 [±51]  |
| Scenario 2 |            |              |                |            |              |
| 2010       | 238 [±4]   | 1329 [±10]   | 18 [±1]        | 234 [±4]   | 1234 [±10]   |
| 2020       | 2705 [±15] | 13173 [±34]  | 202 [±4]       | 2291 [±14] | 12675 [±34]  |
| 2030       | 5470 [±23] | 25220 [±49]  | 416 [±6]       | 4904 [±22] | 25828 [±50]  |

**Table A122. Cumulative incidence cases avoided from year 2010 [per 100000 of population in 2010] for Monaco**

| Year       | Cancers   | CHD & Stroke | Osteoarthritis | Diabetes   | Hypertension |
|------------|-----------|--------------|----------------|------------|--------------|
| Scenario 1 |           |              |                |            |              |
| 2010       | -1 [±6]   | -2 [±14]     | -1 [±2]        | -1 [±6]    | 10 [±14]     |
| 2020       | 46 [±21]  | 227 [±47]    | 1 [±6]         | 192 [±21]  | 300 [±46]    |
| 2030       | 94 [±30]  | 533 [±65]    | 1 [±8]         | 420 [±31]  | 548 [±66]    |
| Scenario 2 |           |              |                |            |              |
| 2010       | -1 [±6]   | -24 [±15]    | 0 [±2]         | -4 [±6]    | 3 [±14]      |
| 2020       | 92 [±21]  | 731 [±47]    | 18 [±6]        | 603 [±20]  | 872 [±46]    |
| 2030       | 200 [±30] | 1558 [±64]   | 36 [±8]        | 1240 [±30] | 1545 [±65]   |

**Table A123. Prevalence cases in year [per 100000] for Monaco**

| Year       | Cancers    | CHD & Stroke | Osteoarthritis | Diabetes   | Hypertension |
|------------|------------|--------------|----------------|------------|--------------|
| Scenario 0 |            |              |                |            |              |
| 2010       | 4555 [±19] | 3402 [±16]   | 491 [±6]       | 4987 [±20] | 57472 [±68]  |
| 2020       | 4490 [±20] | 4007 [±19]   | 458 [±6]       | 4358 [±20] | 57611 [±72]  |
| 2030       | 4506 [±21] | 4048 [±20]   | 460 [±7]       | 4560 [±21] | 57335 [±75]  |
| Scenario 1 |            |              |                |            |              |
| 2010       | 4557 [±19] | 3399 [±16]   | 495 [±6]       | 4978 [±20] | 57517 [±68]  |
| 2020       | 4475 [±20] | 3953 [±19]   | 461 [±6]       | 4220 [±19] | 57432 [±71]  |
| 2030       | 4496 [±21] | 3990 [±20]   | 467 [±7]       | 4350 [±21] | 57067 [±75]  |
| Scenario 2 |            |              |                |            |              |
| 2010       | 4556 [±19] | 3426 [±17]   | 497 [±6]       | 4990 [±20] | 57512 [±68]  |
| 2020       | 4478 [±20] | 3832 [±18]   | 451 [±6]       | 3976 [±19] | 57024 [±71]  |
| 2030       | 4489 [±21] | 3859 [±19]   | 445 [±7]       | 3954 [±20] | 56475 [±74]  |

**Table A124. Prevalence cases avoided in year [per 100000] for Monaco**

| Year       | Cancers  | CHD & Stroke | Osteoarthritis | Diabetes  | Hypertension |
|------------|----------|--------------|----------------|-----------|--------------|
| Scenario 1 |          |              |                |           |              |
| 2010       | -2 [±27] | 3 [±23]      | -4 [±9]        | 9 [±28]   | -45 [±96]    |
| 2020       | 15 [±27] | 54 [±25]     | -3 [±9]        | 138 [±26] | 179 [±96]    |
| 2030       | 10 [±27] | 58 [±25]     | -7 [±9]        | 210 [±27] | 268 [±96]    |
| Scenario 2 |          |              |                |           |              |
| 2010       | -1 [±27] | -24 [±23]    | -6 [±9]        | -3 [±28]  | -40 [±96]    |
| 2020       | 12 [±27] | 175 [±25]    | 7 [±9]         | 382 [±26] | 587 [±96]    |
| 2030       | 17 [±27] | 189 [±25]    | 15 [±9]        | 606 [±26] | 860 [±95]    |

## Montenegro

**Table A125. Cumulative incidence cases from year 2010 [per 100000 of population in 2010] for Montenegro**

| Year       | Cancers           | CHD & Stroke       | Osteoarthritis  | Diabetes          | Hypertension       |
|------------|-------------------|--------------------|-----------------|-------------------|--------------------|
| Scenario 0 |                   |                    |                 |                   |                    |
| 2010       | 135 [ $\pm 3$ ]   | 732 [ $\pm 8$ ]    | 17 [ $\pm 1$ ]  | 213 [ $\pm 4$ ]   | 652 [ $\pm 7$ ]    |
| 2020       | 1487 [ $\pm 11$ ] | 7603 [ $\pm 25$ ]  | 169 [ $\pm 4$ ] | 2356 [ $\pm 14$ ] | 7390 [ $\pm 24$ ]  |
| 2030       | 2928 [ $\pm 16$ ] | 14574 [ $\pm 35$ ] | 330 [ $\pm 5$ ] | 4541 [ $\pm 19$ ] | 14529 [ $\pm 35$ ] |
| Scenario 1 |                   |                    |                 |                   |                    |
| 2010       | 134 [ $\pm 3$ ]   | 733 [ $\pm 8$ ]    | 16 [ $\pm 1$ ]  | 212 [ $\pm 4$ ]   | 653 [ $\pm 7$ ]    |
| 2020       | 1473 [ $\pm 11$ ] | 7560 [ $\pm 25$ ]  | 167 [ $\pm 4$ ] | 2204 [ $\pm 13$ ] | 7183 [ $\pm 24$ ]  |
| 2030       | 2896 [ $\pm 16$ ] | 14442 [ $\pm 35$ ] | 323 [ $\pm 5$ ] | 4212 [ $\pm 19$ ] | 14026 [ $\pm 34$ ] |
| Scenario 2 |                   |                    |                 |                   |                    |
| 2010       | 132 [ $\pm 3$ ]   | 736 [ $\pm 8$ ]    | 16 [ $\pm 1$ ]  | 214 [ $\pm 4$ ]   | 654 [ $\pm 7$ ]    |
| 2020       | 1427 [ $\pm 11$ ] | 7245 [ $\pm 24$ ]  | 158 [ $\pm 4$ ] | 1858 [ $\pm 12$ ] | 6675 [ $\pm 23$ ]  |
| 2030       | 2809 [ $\pm 15$ ] | 13816 [ $\pm 34$ ] | 305 [ $\pm 5$ ] | 3560 [ $\pm 17$ ] | 13095 [ $\pm 33$ ] |

**Table A126. Cumulative incidence cases avoided from year 2010 [per 100000 of population in 2010] for Montenegro**

| Year       | Cancers          | CHD & Stroke     | Osteoarthritis | Diabetes         | Hypertension      |
|------------|------------------|------------------|----------------|------------------|-------------------|
| Scenario 1 |                  |                  |                |                  |                   |
| 2010       | 1 [ $\pm 5$ ]    | -1 [ $\pm 11$ ]  | 1 [ $\pm 2$ ]  | 1 [ $\pm 6$ ]    | -1 [ $\pm 10$ ]   |
| 2020       | 14 [ $\pm 15$ ]  | 43 [ $\pm 35$ ]  | 2 [ $\pm 5$ ]  | 152 [ $\pm 19$ ] | 207 [ $\pm 34$ ]  |
| 2030       | 32 [ $\pm 22$ ]  | 132 [ $\pm 48$ ] | 7 [ $\pm 7$ ]  | 329 [ $\pm 26$ ] | 503 [ $\pm 48$ ]  |
| Scenario 2 |                  |                  |                |                  |                   |
| 2010       | 3 [ $\pm 5$ ]    | -4 [ $\pm 11$ ]  | 1 [ $\pm 2$ ]  | -1 [ $\pm 6$ ]   | -2 [ $\pm 10$ ]   |
| 2020       | 60 [ $\pm 15$ ]  | 358 [ $\pm 34$ ] | 11 [ $\pm 5$ ] | 498 [ $\pm 18$ ] | 715 [ $\pm 34$ ]  |
| 2030       | 119 [ $\pm 21$ ] | 758 [ $\pm 48$ ] | 25 [ $\pm 7$ ] | 981 [ $\pm 25$ ] | 1434 [ $\pm 47$ ] |

**Table A127. Prevalence cases in year [per 100000] for Montenegro**

| Year       | Cancers    | CHD & Stroke | Osteoarthritis | Diabetes   | Hypertension |
|------------|------------|--------------|----------------|------------|--------------|
| Scenario 0 |            |              |                |            |              |
| 2010       | 997 [±9]   | 2105 [±13]   | 335 [±5]       | 5239 [±20] | 15121 [±35]  |
| 2020       | 1151 [±10] | 2512 [±14]   | 341 [±5]       | 5191 [±21] | 16059 [±36]  |
| 2030       | 1218 [±10] | 2644 [±15]   | 359 [±5]       | 5440 [±21] | 17175 [±38]  |
| Scenario 1 |            |              |                |            |              |
| 2010       | 998 [±9]   | 2108 [±13]   | 331 [±5]       | 5257 [±21] | 15121 [±35]  |
| 2020       | 1147 [±10] | 2514 [±14]   | 338 [±5]       | 5075 [±20] | 15888 [±36]  |
| 2030       | 1202 [±10] | 2628 [±15]   | 356 [±5]       | 5178 [±21] | 16756 [±37]  |
| Scenario 2 |            |              |                |            |              |
| 2010       | 1003 [±9]  | 2113 [±13]   | 329 [±5]       | 5249 [±20] | 15107 [±35]  |
| 2020       | 1123 [±10] | 2437 [±14]   | 330 [±5]       | 4807 [±20] | 15490 [±35]  |
| 2030       | 1173 [±10] | 2519 [±14]   | 342 [±5]       | 4741 [±20] | 16128 [±37]  |

**Table A128. Prevalence cases avoided in year [per 100000] for Montenegro**

| Year       | Cancers  | CHD & Stroke | Osteoarthritis | Diabetes  | Hypertension |
|------------|----------|--------------|----------------|-----------|--------------|
| Scenario 1 |          |              |                |           |              |
| 2010       | -1 [±13] | -3 [±18]     | 4 [±7]         | -18 [±29] | 0 [±49]      |
| 2020       | 4 [±14]  | -2 [±20]     | 3 [±7]         | 116 [±29] | 171 [±51]    |
| 2030       | 16 [±14] | 16 [±21]     | 3 [±8]         | 262 [±29] | 419 [±52]    |
| Scenario 2 |          |              |                |           |              |
| 2010       | -6 [±13] | -8 [±18]     | 6 [±7]         | -10 [±29] | 14 [±49]     |
| 2020       | 28 [±13] | 75 [±20]     | 11 [±7]        | 384 [±28] | 569 [±50]    |
| 2030       | 45 [±14] | 125 [±20]    | 17 [±7]        | 699 [±29] | 1047 [±52]   |

## Netherlands

**Table A129. Cumulative incidence cases from year 2010 [per 100000 of population in 2010] for the Netherlands**

| Year       | Cancers    | CHD & Stroke | Osteoarthritis | Diabetes   | Hypertension |
|------------|------------|--------------|----------------|------------|--------------|
| Scenario 0 |            |              |                |            |              |
| 2010       | 237 [±4]   | 1006 [±9]    | 219 [±4]       | 219 [±4]   | 1055 [±9]    |
| 2020       | 3057 [±17] | 12610 [±34]  | 2820 [±16]     | 2744 [±16] | 12989 [±35]  |
| 2030       | 6953 [±28] | 28886 [±57]  | 6272 [±27]     | 6204 [±26] | 28037 [±56]  |
| Scenario 1 |            |              |                |            |              |
| 2010       | 238 [±4]   | 1008 [±9]    | 218 [±4]       | 217 [±4]   | 1058 [±9]    |
| 2020       | 3051 [±17] | 12398 [±34]  | 2742 [±16]     | 2608 [±16] | 12677 [±34]  |
| 2030       | 6907 [±28] | 28380 [±56]  | 6113 [±26]     | 5908 [±26] | 27417 [±55]  |
| Scenario 2 |            |              |                |            |              |
| 2010       | 236 [±4]   | 1006 [±9]    | 218 [±4]       | 223 [±4]   | 1053 [±9]    |
| 2020       | 2962 [±17] | 11771 [±33]  | 2587 [±16]     | 2217 [±14] | 11997 [±33]  |
| 2030       | 6721 [±27] | 26894 [±55]  | 5766 [±25]     | 5072 [±24] | 25886 [±54]  |

**Table A130. Cumulative incidence cases avoided from year 2010 [per 100000 of population in 2010] Netherlands**

| Year       | Cancers   | CHD & Stroke | Osteoarthritis | Diabetes   | Hypertension |
|------------|-----------|--------------|----------------|------------|--------------|
| Scenario 1 |           |              |                |            |              |
| 2010       | -1 [±6]   | -2 [±13]     | 1 [±6]         | 2 [±6]     | -3 [±13]     |
| 2020       | 6 [±22]   | 212 [±45]    | 78 [±21]       | 136 [±21]  | 312 [±45]    |
| 2030       | 46 [±33]  | 506 [±68]    | 159 [±31]      | 296 [±31]  | 620 [±67]    |
| Scenario 2 |           |              |                |            |              |
| 2010       | 1 [±6]    | 0 [±13]      | 1 [±6]         | -4 [±6]    | 2 [±13]      |
| 2020       | 95 [±22]  | 839 [±44]    | 233 [±21]      | 527 [±20]  | 992 [±45]    |
| 2030       | 232 [±33] | 1992 [±67]   | 506 [±31]      | 1132 [±30] | 2151 [±66]   |

**Table A131. Prevalence cases in year [per 100000] for The Netherlands**

| Year       | Cancers    | CHD & Stroke | Osteoarthritis | Diabetes   | Hypertension |
|------------|------------|--------------|----------------|------------|--------------|
| Scenario 0 |            |              |                |            |              |
| 2010       | 2253 [±13] | 4904 [±20]   | 5406 [±21]     | 2436 [±14] | 28935 [±48]  |
| 2020       | 2889 [±16] | 6500 [±25]   | 6336 [±24]     | 2989 [±17] | 35543 [±58]  |
| 2030       | 3450 [±20] | 7927 [±30]   | 7407 [±29]     | 3542 [±20] | 41456 [±68]  |
| Scenario 1 |            |              |                |            |              |
| 2010       | 2266 [±13] | 4905 [±20]   | 5409 [±21]     | 2437 [±14] | 28916 [±48]  |
| 2020       | 2885 [±16] | 6400 [±24]   | 6281 [±24]     | 2892 [±16] | 35285 [±57]  |
| 2030       | 3437 [±20] | 7778 [±30]   | 7307 [±29]     | 3408 [±20] | 41009 [±68]  |
| Scenario 2 |            |              |                |            |              |
| 2010       | 2253 [±13] | 4890 [±20]   | 5408 [±21]     | 2434 [±14] | 28908 [±48]  |
| 2020       | 2850 [±16] | 6114 [±24]   | 6166 [±24]     | 2634 [±16] | 34781 [±57]  |
| 2030       | 3405 [±19] | 7385 [±29]   | 7104 [±28]     | 3060 [±18] | 40045 [±67]  |

**Table A132. Prevalence cases avoided in year [per 100000] for Netherlands**

| Year       | Cancers   | CHD & Stroke | Osteoarthritis | Diabetes  | Hypertension |
|------------|-----------|--------------|----------------|-----------|--------------|
| Scenario 1 |           |              |                |           |              |
| 2010       | -13 [±19] | -1 [±28]     | -3 [±29]       | -1 [±20]  | 19 [±68]     |
| 2020       | 4 [±21]   | 100 [±32]    | 55 [±32]       | 97 [±22]  | 258 [±75]    |
| 2030       | 13 [±23]  | 149 [±35]    | 100 [±34]      | 134 [±24] | 447 [±81]    |
| Scenario 2 |           |              |                |           |              |
| 2010       | 0 [±19]   | 14 [±28]     | -2 [±29]       | 2 [±20]   | 27 [±68]     |
| 2020       | 39 [±21]  | 386 [±32]    | 170 [±32]      | 355 [±21] | 762 [±75]    |
| 2030       | 45 [±23]  | 542 [±35]    | 303 [±34]      | 482 [±23] | 1411 [±81]   |

## Norway

**Table A133. Cumulative incidence cases from year 2010 [per 100000 of population in 2010] for Norway**

| Year       | Cancers    | CHD & Stroke | Osteoarthritis | Diabetes   | Hypertension |
|------------|------------|--------------|----------------|------------|--------------|
| Scenario 0 |            |              |                |            |              |
| 2010       | 200 [±4]   | 861 [±8]     | 493 [±6]       | 124 [±3]   | 550 [±7]     |
| 2020       | 2324 [±14] | 8686 [±27]   | 5756 [±22]     | 1516 [±11] | 6430 [±23]   |
| 2030       | 4596 [±19] | 16870 [±37]  | 11407 [±31]    | 3156 [±16] | 12871 [±33]  |
| Scenario 1 |            |              |                |            |              |
| 2010       | 198 [±4]   | 864 [±8]     | 493 [±6]       | 124 [±3]   | 549 [±7]     |
| 2020       | 2298 [±14] | 8597 [±26]   | 5648 [±21]     | 1425 [±11] | 6269 [±23]   |
| 2030       | 4540 [±19] | 16632 [±37]  | 11177 [±30]    | 2941 [±16] | 12546 [±32]  |
| Scenario 2 |            |              |                |            |              |
| 2010       | 199 [±4]   | 849 [±8]     | 488 [±6]       | 124 [±3]   | 550 [±7]     |
| 2020       | 2240 [±13] | 8224 [±26]   | 5322 [±21]     | 1208 [±10] | 5874 [±22]   |
| 2030       | 4425 [±19] | 15886 [±36]  | 10589 [±29]    | 2514 [±14] | 11683 [±31]  |

**Table A134. Cumulative incidence cases avoided from year 2010 [per 100000 of population in 2010] for Norway**

| Year       | Cancers   | CHD & Stroke | Osteoarthritis | Diabetes  | Hypertension |
|------------|-----------|--------------|----------------|-----------|--------------|
| Scenario 1 |           |              |                |           |              |
| 2010       | 2 [±6]    | -3 [±12]     | 0 [±9]         | 0 [±4]    | 1 [±9]       |
| 2020       | 26 [±19]  | 89 [±37]     | 108 [±30]      | 91 [±15]  | 161 [±32]    |
| 2030       | 56 [±27]  | 238 [±52]    | 230 [±43]      | 215 [±22] | 325 [±45]    |
| Scenario 2 |           |              |                |           |              |
| 2010       | 1 [±6]    | 12 [±12]     | 5 [±9]         | 0 [±4]    | 0 [±9]       |
| 2020       | 84 [±19]  | 462 [±37]    | 434 [±30]      | 308 [±15] | 556 [±31]    |
| 2030       | 171 [±27] | 984 [±51]    | 818 [±42]      | 642 [±21] | 1188 [±44]   |

**Table A135. Prevalence cases in year [per 100000] for Norway**

| Year       | Cancers    | CHD & Stroke | Osteoarthritis | Diabetes   | Hypertension |
|------------|------------|--------------|----------------|------------|--------------|
| Scenario 0 |            |              |                |            |              |
| 2010       | 2862 [±15] | 1361 [±10]   | 10972 [±30]    | 2715 [±15] | 11631 [±31]  |
| 2020       | 3098 [±16] | 1856 [±12]   | 11508 [±31]    | 2572 [±14] | 12324 [±32]  |
| 2030       | 3265 [±16] | 2027 [±13]   | 12301 [±32]    | 2777 [±15] | 13244 [±33]  |
| Scenario 1 |            |              |                |            |              |
| 2010       | 2871 [±15] | 1366 [±10]   | 10991 [±30]    | 2723 [±15] | 11632 [±31]  |
| 2020       | 3093 [±16] | 1832 [±12]   | 11403 [±30]    | 2506 [±14] | 12178 [±31]  |
| 2030       | 3253 [±16] | 1999 [±13]   | 12138 [±32]    | 2647 [±15] | 13011 [±33]  |
| Scenario 2 |            |              |                |            |              |
| 2010       | 2848 [±15] | 1354 [±10]   | 10963 [±30]    | 2725 [±15] | 11610 [±30]  |
| 2020       | 3054 [±16] | 1767 [±12]   | 11184 [±30]    | 2373 [±14] | 11899 [±31]  |
| 2030       | 3210 [±16] | 1913 [±13]   | 11822 [±31]    | 2437 [±14] | 12487 [±32]  |

**Table A136. Prevalence cases avoided in year [per 100000] for Norway**

| Year       | Cancers  | CHD & Stroke | Osteoarthritis | Diabetes  | Hypertension |
|------------|----------|--------------|----------------|-----------|--------------|
| Scenario 1 |          |              |                |           |              |
| 2010       | -9 [±21] | -5 [±15]     | -19 [±42]      | -8 [±21]  | -1 [±43]     |
| 2020       | 5 [±22]  | 24 [±17]     | 105 [±43]      | 66 [±20]  | 146 [±44]    |
| 2030       | 12 [±23] | 28 [±18]     | 163 [±44]      | 130 [±21] | 233 [±46]    |
| Scenario 2 |          |              |                |           |              |
| 2010       | 14 [±21] | 7 [±15]      | 9 [±42]        | -10 [±21] | 21 [±43]     |
| 2020       | 44 [±22] | 89 [±17]     | 324 [±43]      | 199 [±20] | 425 [±44]    |
| 2030       | 55 [±23] | 114 [±18]    | 479 [±44]      | 340 [±20] | 757 [±45]    |



## Poland

**Table A137. Cumulative incidence cases from year 2010 [per 100000 of population in 2010] for Poland**

| Year       | Cancers           | CHD & Stroke       | Osteoarthritis  | Diabetes          | Hypertension       |
|------------|-------------------|--------------------|-----------------|-------------------|--------------------|
| Scenario 0 |                   |                    |                 |                   |                    |
| 2010       | 132 [ $\pm 3$ ]   | 987 [ $\pm 9$ ]    | 19 [ $\pm 1$ ]  | 203 [ $\pm 4$ ]   | 667 [ $\pm 7$ ]    |
| 2020       | 1674 [ $\pm 12$ ] | 10546 [ $\pm 31$ ] | 250 [ $\pm 5$ ] | 2426 [ $\pm 15$ ] | 8627 [ $\pm 28$ ]  |
| 2030       | 3857 [ $\pm 21$ ] | 23564 [ $\pm 51$ ] | 566 [ $\pm 8$ ] | 5396 [ $\pm 25$ ] | 19558 [ $\pm 47$ ] |
| Scenario 1 |                   |                    |                 |                   |                    |
| 2010       | 133 [ $\pm 3$ ]   | 988 [ $\pm 9$ ]    | 20 [ $\pm 1$ ]  | 203 [ $\pm 4$ ]   | 674 [ $\pm 7$ ]    |
| 2020       | 1659 [ $\pm 12$ ] | 10377 [ $\pm 31$ ] | 246 [ $\pm 5$ ] | 2252 [ $\pm 14$ ] | 8369 [ $\pm 28$ ]  |
| 2030       | 3820 [ $\pm 21$ ] | 23163 [ $\pm 51$ ] | 556 [ $\pm 8$ ] | 5011 [ $\pm 24$ ] | 18954 [ $\pm 46$ ] |
| Scenario 2 |                   |                    |                 |                   |                    |
| 2010       | 132 [ $\pm 3$ ]   | 988 [ $\pm 9$ ]    | 19 [ $\pm 1$ ]  | 200 [ $\pm 4$ ]   | 663 [ $\pm 7$ ]    |
| 2020       | 1613 [ $\pm 12$ ] | 9866 [ $\pm 30$ ]  | 234 [ $\pm 5$ ] | 1832 [ $\pm 13$ ] | 7726 [ $\pm 27$ ]  |
| 2030       | 3709 [ $\pm 20$ ] | 22018 [ $\pm 49$ ] | 524 [ $\pm 8$ ] | 4064 [ $\pm 21$ ] | 17327 [ $\pm 44$ ] |

**Table A138. Cumulative incidence cases avoided from year 2010 [per 100000 of population in 2010] Poland**

| Year       | Cancers          | CHD & Stroke      | Osteoarthritis | Diabetes          | Hypertension      |
|------------|------------------|-------------------|----------------|-------------------|-------------------|
| Scenario 1 |                  |                   |                |                   |                   |
| 2010       | -1 [ $\pm 5$ ]   | -1 [ $\pm 13$ ]   | -1 [ $\pm 2$ ] | 0 [ $\pm 6$ ]     | -7 [ $\pm 10$ ]   |
| 2020       | 15 [ $\pm 16$ ]  | 169 [ $\pm 41$ ]  | 4 [ $\pm 6$ ]  | 174 [ $\pm 19$ ]  | 258 [ $\pm 37$ ]  |
| 2030       | 37 [ $\pm 25$ ]  | 401 [ $\pm 61$ ]  | 10 [ $\pm 9$ ] | 385 [ $\pm 29$ ]  | 604 [ $\pm 56$ ]  |
| Scenario 2 |                  |                   |                |                   |                   |
| 2010       | 0 [ $\pm 5$ ]    | -1 [ $\pm 13$ ]   | 0 [ $\pm 2$ ]  | 3 [ $\pm 6$ ]     | 4 [ $\pm 10$ ]    |
| 2020       | 61 [ $\pm 16$ ]  | 680 [ $\pm 40$ ]  | 16 [ $\pm 6$ ] | 594 [ $\pm 18$ ]  | 901 [ $\pm 36$ ]  |
| 2030       | 148 [ $\pm 25$ ] | 1546 [ $\pm 60$ ] | 42 [ $\pm 9$ ] | 1332 [ $\pm 28$ ] | 2231 [ $\pm 54$ ] |

**Table A139. Prevalence cases in year [per 100000] for Poland**

| Year       | Cancers    | CHD & Stroke | Osteoarthritis | Diabetes   | Hypertension |
|------------|------------|--------------|----------------|------------|--------------|
| Scenario 0 |            |              |                |            |              |
| 2010       | 786 [±8]   | 1738 [±12]   | 434 [±6]       | 5080 [±20] | 16306 [±36]  |
| 2020       | 1050 [±10] | 2187 [±14]   | 494 [±7]       | 5072 [±22] | 19038 [±42]  |
| 2030       | 1297 [±12] | 2755 [±18]   | 601 [±8]       | 5759 [±25] | 22979 [±51]  |
| Scenario 1 |            |              |                |            |              |
| 2010       | 784 [±8]   | 1740 [±12]   | 434 [±6]       | 5085 [±20] | 16305 [±36]  |
| 2020       | 1044 [±10] | 2143 [±14]   | 496 [±7]       | 4937 [±21] | 18824 [±42]  |
| 2030       | 1292 [±12] | 2725 [±17]   | 596 [±8]       | 5486 [±25] | 22566 [±50]  |
| Scenario 2 |            |              |                |            |              |
| 2010       | 781 [±8]   | 1735 [±12]   | 433 [±6]       | 5086 [±20] | 16285 [±36]  |
| 2020       | 1022 [±10] | 2079 [±14]   | 485 [±7]       | 4682 [±21] | 18404 [±41]  |
| 2030       | 1268 [±12] | 2608 [±17]   | 579 [±8]       | 4923 [±23] | 21503 [±49]  |

**Table A140. Prevalence cases avoided in year [per 100000] Poland**

| Year       | Cancers  | CHD & Stroke | Osteoarthritis | Diabetes  | Hypertension |
|------------|----------|--------------|----------------|-----------|--------------|
| Scenario 1 |          |              |                |           |              |
| 2010       | 2 [±11]  | -2 [±17]     | 0 [±8]         | -5 [±29]  | 1 [±51]      |
| 2020       | 6 [±13]  | 44 [±19]     | -2 [±9]        | 135 [±28] | 214 [±55]    |
| 2030       | 5 [±14]  | 30 [±21]     | 5 [±10]        | 273 [±30] | 413 [±60]    |
| Scenario 2 |          |              |                |           |              |
| 2010       | 5 [±11]  | 3 [±17]      | 1 [±8]         | -6 [±29]  | 21 [±51]     |
| 2020       | 28 [±13] | 108 [±18]    | 9 [±9]         | 390 [±28] | 634 [±55]    |
| 2030       | 29 [±14] | 147 [±21]    | 22 [±10]       | 836 [±29] | 1476 [±60]   |

## Portugal

**Table A141. Cumulative incidence cases from year 2010 [per 100000 of population in 2010] for Portugal**

| Year       | Cancers    | CHD & Stroke | Osteoarthritis | Diabetes   | Hypertension |
|------------|------------|--------------|----------------|------------|--------------|
| Scenario 0 |            |              |                |            |              |
| 2010       | 169 [±4]   | 1091 [±9]    | 16 [±1]        | 166 [±4]   | 739 [±8]     |
| 2020       | 1950 [±13] | 12046 [±31]  | 192 [±4]       | 1794 [±12] | 8058 [±26]   |
| 2030       | 3998 [±19] | 24590 [±46]  | 391 [±6]       | 3507 [±17] | 15738 [±37]  |
| Scenario 1 |            |              |                |            |              |
| 2010       | 170 [±4]   | 1087 [±9]    | 17 [±1]        | 166 [±4]   | 741 [±8]     |
| 2020       | 1932 [±13] | 11925 [±31]  | 189 [±4]       | 1688 [±12] | 7877 [±25]   |
| 2030       | 3965 [±19] | 24351 [±46]  | 381 [±6]       | 3278 [±17] | 15353 [±37]  |
| Scenario 2 |            |              |                |            |              |
| 2010       | 168 [±4]   | 1101 [±9]    | 16 [±1]        | 165 [±4]   | 745 [±8]     |
| 2020       | 1870 [±12] | 11493 [±31]  | 175 [±4]       | 1360 [±11] | 7255 [±24]   |
| 2030       | 3819 [±18] | 23379 [±45]  | 352 [±6]       | 2655 [±15] | 14046 [±35]  |

**Table A142. Cumulative incidence cases avoided from year 2010 [per 100000 of population in 2010] Portugal**

| Year       | Cancers   | CHD & Stroke | Osteoarthritis | Diabetes  | Hypertension |
|------------|-----------|--------------|----------------|-----------|--------------|
| Scenario 1 |           |              |                |           |              |
| 2010       | -1 [±5]   | 4 [±13]      | -1 [±2]        | 0 [±5]    | -2 [±11]     |
| 2020       | 18 [±18]  | 121 [±44]    | 3 [±6]         | 106 [±17] | 181 [±36]    |
| 2030       | 33 [±25]  | 239 [±63]    | 10 [±8]        | 229 [±23] | 385 [±50]    |
| Scenario 2 |           |              |                |           |              |
| 2010       | 1 [±5]    | -10 [±13]    | 0 [±2]         | 1 [±5]    | -6 [±11]     |
| 2020       | 80 [±17]  | 553 [±43]    | 17 [±5]        | 434 [±16] | 803 [±35]    |
| 2030       | 179 [±25] | 1211 [±62]   | 39 [±8]        | 852 [±22] | 1692 [±49]   |

**Table A143. Prevalence cases in year [per 100000] for Portugal**

| Year       | Cancers  | CHD & Stroke | Osteoarthritis | Diabetes   | Hypertension |
|------------|----------|--------------|----------------|------------|--------------|
| Scenario 0 |          |              |                |            |              |
| 2010       | 660 [±7] | 4159 [±18]   | 416 [±6]       | 4177 [±18] | 17216 [±37]  |
| 2020       | 810 [±8] | 5118 [±21]   | 437 [±6]       | 4528 [±19] | 19181 [±40]  |
| 2030       | 917 [±9] | 5759 [±22]   | 470 [±6]       | 4791 [±20] | 20435 [±42]  |
| Scenario 1 |          |              |                |            |              |
| 2010       | 665 [±7] | 4151 [±18]   | 422 [±6]       | 4181 [±18] | 17223 [±37]  |
| 2020       | 808 [±8] | 5069 [±20]   | 439 [±6]       | 4442 [±19] | 19037 [±40]  |
| 2030       | 914 [±9] | 5655 [±22]   | 466 [±6]       | 4601 [±20] | 20130 [±42]  |
| Scenario 2 |          |              |                |            |              |
| 2010       | 667 [±7] | 4189 [±18]   | 416 [±6]       | 4172 [±18] | 17217 [±37]  |
| 2020       | 791 [±8] | 4911 [±20]   | 426 [±6]       | 4157 [±18] | 18545 [±39]  |
| 2030       | 879 [±9] | 5408 [±22]   | 445 [±6]       | 4117 [±19] | 19208 [±41]  |

**Table A144. Prevalence cases avoided in year [per 100000] Portugal**

| Year       | Cancers  | CHD & Stroke | Osteoarthritis | Diabetes  | Hypertension |
|------------|----------|--------------|----------------|-----------|--------------|
| Scenario 1 |          |              |                |           |              |
| 2010       | -5 [±10] | 8 [±26]      | -6 [±8]        | -4 [±26]  | -7 [±52]     |
| 2020       | 2 [±11]  | 49 [±29]     | -2 [±8]        | 86 [±27]  | 144 [±55]    |
| 2030       | 3 [±12]  | 104 [±30]    | 4 [±9]         | 190 [±27] | 305 [±57]    |
| Scenario 2 |          |              |                |           |              |
| 2010       | -7 [±10] | -30 [±26]    | 0 [±8]         | 5 [±26]   | -1 [±52]     |
| 2020       | 19 [±11] | 207 [±28]    | 11 [±8]        | 371 [±26] | 636 [±55]    |
| 2030       | 38 [±12] | 351 [±30]    | 25 [±9]        | 674 [±27] | 1227 [±56]   |

## Republic of Macedonia

**Table A145. Cumulative incidence cases from year 2010 [per 100000 of population in 2010] for The Republic of Macedonia**

| Year       | Cancers    | CHD & Stroke | Osteoarthritis | Diabetes   | Hypertension |
|------------|------------|--------------|----------------|------------|--------------|
| Scenario 0 |            |              |                |            |              |
| 2010       | 134 [±3]   | 1238 [±10]   | 15 [±1]        | 252 [±4]   | 1781 [±12]   |
| 2020       | 1572 [±11] | 12717 [±32]  | 175 [±4]       | 2771 [±15] | 17912 [±39]  |
| 2030       | 3198 [±17] | 25371 [±47]  | 354 [±6]       | 5413 [±22] | 34255 [±55]  |
| Scenario 1 |            |              |                |            |              |
| 2010       | 137 [±3]   | 1230 [±10]   | 14 [±1]        | 255 [±5]   | 1779 [±12]   |
| 2020       | 1572 [±11] | 12536 [±32]  | 165 [±4]       | 2666 [±15] | 17602 [±38]  |
| 2030       | 3182 [±17] | 24985 [±47]  | 341 [±5]       | 5214 [±21] | 33870 [±54]  |
| Scenario 2 |            |              |                |            |              |
| 2010       | 135 [±3]   | 1233 [±10]   | 15 [±1]        | 252 [±4]   | 1779 [±12]   |
| 2020       | 1511 [±11] | 12144 [±32]  | 157 [±4]       | 2237 [±14] | 16772 [±37]  |
| 2030       | 3079 [±16] | 24149 [±46]  | 325 [±5]       | 4390 [±20] | 32856 [±54]  |

**Table A146. Cumulative incidence cases avoided from year 2010 [per 100000 of population in 2010] for Macedonia**

| Year       | Cancers   | CHD & Stroke | Diabetes   | Hypertension | Osteoarthritis |
|------------|-----------|--------------|------------|--------------|----------------|
| Scenario 1 |           |              |            |              |                |
| 2010       | -3 [±5]   | 8 [±14]      | -3 [±6]    | 2 [±17]      | 1 [±2]         |
| 2020       | 0 [±16]   | 181 [±45]    | 105 [±21]  | 310 [±53]    | 10 [±5]        |
| 2030       | 16 [±23]  | 386 [±63]    | 199 [±29]  | 385 [±74]    | 13 [±7]        |
| Scenario 2 |           |              |            |              |                |
| 2010       | -1 [±5]   | 5 [±14]      | 0 [±6]     | 2 [±17]      | 0 [±2]         |
| 2020       | 61 [±16]  | 573 [±45]    | 534 [±20]  | 1140 [±53]   | 18 [±5]        |
| 2030       | 119 [±22] | 1222 [±63]   | 1023 [±28] | 1399 [±73]   | 29 [±7]        |

**Table A147. Prevalence cases in year [per 100000] for The Republic of Macedonia**

| Year       | Cancers           | CHD & Stroke      | Osteoarthritis  | Diabetes          | Hypertension       |
|------------|-------------------|-------------------|-----------------|-------------------|--------------------|
| Scenario 0 |                   |                   |                 |                   |                    |
| 2010       | 960 [ $\pm 9$ ]   | 3920 [ $\pm 18$ ] | 322 [ $\pm 5$ ] | 5704 [ $\pm 21$ ] | 48850 [ $\pm 63$ ] |
| 2020       | 1161 [ $\pm 10$ ] | 4671 [ $\pm 20$ ] | 340 [ $\pm 5$ ] | 6219 [ $\pm 23$ ] | 53661 [ $\pm 67$ ] |
| 2030       | 1271 [ $\pm 11$ ] | 5133 [ $\pm 21$ ] | 371 [ $\pm 6$ ] | 6487 [ $\pm 24$ ] | 57062 [ $\pm 71$ ] |
| Scenario 1 |                   |                   |                 |                   |                    |
| 2010       | 962 [ $\pm 9$ ]   | 3921 [ $\pm 18$ ] | 321 [ $\pm 5$ ] | 5709 [ $\pm 21$ ] | 48826 [ $\pm 62$ ] |
| 2020       | 1160 [ $\pm 10$ ] | 4597 [ $\pm 20$ ] | 332 [ $\pm 5$ ] | 6144 [ $\pm 23$ ] | 53373 [ $\pm 67$ ] |
| 2030       | 1260 [ $\pm 10$ ] | 5015 [ $\pm 21$ ] | 364 [ $\pm 6$ ] | 6368 [ $\pm 24$ ] | 56800 [ $\pm 71$ ] |
| Scenario 2 |                   |                   |                 |                   |                    |
| 2010       | 959 [ $\pm 9$ ]   | 3923 [ $\pm 18$ ] | 325 [ $\pm 5$ ] | 5710 [ $\pm 21$ ] | 48916 [ $\pm 63$ ] |
| 2020       | 1131 [ $\pm 10$ ] | 4433 [ $\pm 19$ ] | 327 [ $\pm 5$ ] | 5801 [ $\pm 22$ ] | 52737 [ $\pm 66$ ] |
| 2030       | 1239 [ $\pm 10$ ] | 4810 [ $\pm 20$ ] | 354 [ $\pm 6$ ] | 5802 [ $\pm 23$ ] | 56131 [ $\pm 70$ ] |

**Table A148. Prevalence cases avoided in year [per 100000] for Macedonia**

| Year       | Cancers         | CHD & Stroke     | Diabetes         | Hypertension     | Osteoarthritis |
|------------|-----------------|------------------|------------------|------------------|----------------|
| Scenario 1 |                 |                  |                  |                  |                |
| 2010       | -2 [ $\pm 12$ ] | -1 [ $\pm 25$ ]  | -5 [ $\pm 30$ ]  | 24 [ $\pm 88$ ]  | 1 [ $\pm 7$ ]  |
| 2020       | 1 [ $\pm 14$ ]  | 74 [ $\pm 27$ ]  | 75 [ $\pm 31$ ]  | 288 [ $\pm 93$ ] | 8 [ $\pm 7$ ]  |
| 2030       | 11 [ $\pm 14$ ] | 118 [ $\pm 28$ ] | 119 [ $\pm 32$ ] | 262 [ $\pm 95$ ] | 7 [ $\pm 8$ ]  |
| Scenario 2 |                 |                  |                  |                  |                |
| 2010       | 1 [ $\pm 12$ ]  | -3 [ $\pm 25$ ]  | -6 [ $\pm 30$ ]  | -66 [ $\pm 88$ ] | -3 [ $\pm 7$ ] |
| 2020       | 30 [ $\pm 14$ ] | 238 [ $\pm 27$ ] | 418 [ $\pm 31$ ] | 924 [ $\pm 92$ ] | 13 [ $\pm 7$ ] |
| 2030       | 32 [ $\pm 14$ ] | 323 [ $\pm 28$ ] | 685 [ $\pm 31$ ] | 931 [ $\pm 95$ ] | 17 [ $\pm 8$ ] |

## Republic of Moldova

**Table A149. Cumulative incidence cases from year 2010 [per 100000 of population in 2010] for Republic of Moldova**

| Year       | Cancers    | CHD & Stroke | Osteoarthritis | Diabetes   | Hypertension |
|------------|------------|--------------|----------------|------------|--------------|
| Scenario 0 |            |              |                |            |              |
| 2010       | 136 [±3]   | 673 [±7]     | 25 [±1]        | 223 [±4]   | 657 [±7]     |
| 2020       | 1594 [±11] | 7871 [±25]   | 286 [±5]       | 2689 [±15] | 6871 [±24]   |
| 2030       | 3223 [±17] | 16206 [±38]  | 590 [±7]       | 5484 [±22] | 13603 [±34]  |
| Scenario 1 |            |              |                |            |              |
| 2010       | 139 [±3]   | 672 [±7]     | 26 [±1]        | 223 [±4]   | 653 [±7]     |
| 2020       | 1577 [±11] | 7784 [±25]   | 281 [±5]       | 2478 [±14] | 6698 [±23]   |
| 2030       | 3183 [±17] | 15966 [±37]  | 576 [±7]       | 5060 [±21] | 13167 [±34]  |
| Scenario 2 |            |              |                |            |              |
| 2010       | 140 [±3]   | 685 [±7]     | 26 [±1]        | 224 [±4]   | 657 [±7]     |
| 2020       | 1531 [±11] | 7434 [±25]   | 262 [±5]       | 2080 [±13] | 6274 [±23]   |
| 2030       | 3075 [±16] | 15177 [±36]  | 535 [±7]       | 4234 [±19] | 12310 [±33]  |

**Table A150. Cumulative incidence cases avoided from year 2010 [per 100000 of population in 2010] for Moldova**

| Year       | Cancers   | CHD & Stroke | Diabetes   | Hypertension | Osteoarthritis |
|------------|-----------|--------------|------------|--------------|----------------|
| Scenario 1 |           |              |            |              |                |
| 2010       | -3 [±5]   | 1 [±10]      | 0 [±6]     | 4 [±10]      | -1 [±2]        |
| 2020       | 17 [±16]  | 87 [±35]     | 211 [±20]  | 173 [±33]    | 5 [±7]         |
| 2030       | 40 [±23]  | 240 [±51]    | 424 [±29]  | 436 [±46]    | 14 [±10]       |
| Scenario 2 |           |              |            |              |                |
| 2010       | -4 [±5]   | -12 [±10]    | -1 [±6]    | 0 [±10]      | -1 [±2]        |
| 2020       | 63 [±16]  | 437 [±35]    | 609 [±20]  | 597 [±32]    | 24 [±7]        |
| 2030       | 148 [±22] | 1029 [±50]   | 1250 [±28] | 1293 [±46]   | 55 [±9]        |

**Table A151. Prevalence cases in year [per 100000] for Republic of Moldova**

| Year       | Cancers    | CHD & Stroke | Osteoarthritis | Diabetes   | Hypertension |
|------------|------------|--------------|----------------|------------|--------------|
| Scenario 0 |            |              |                |            |              |
| 2010       | 796 [±8]   | 4438 [±19]   | 520 [±6]       | 4498 [±19] | 16552 [±36]  |
| 2020       | 986 [±9]   | 5303 [±21]   | 550 [±7]       | 5504 [±21] | 18310 [±39]  |
| 2030       | 1048 [±10] | 5850 [±23]   | 599 [±7]       | 6308 [±23] | 19356 [±41]  |
| Scenario 1 |            |              |                |            |              |
| 2010       | 794 [±8]   | 4440 [±19]   | 522 [±6]       | 4518 [±19] | 16553 [±36]  |
| 2020       | 980 [±9]   | 5249 [±21]   | 543 [±7]       | 5331 [±21] | 18158 [±39]  |
| 2030       | 1030 [±9]  | 5738 [±22]   | 588 [±7]       | 5976 [±23] | 19001 [±41]  |
| Scenario 2 |            |              |                |            |              |
| 2010       | 807 [±8]   | 4450 [±19]   | 524 [±6]       | 4512 [±19] | 16543 [±36]  |
| 2020       | 959 [±9]   | 5045 [±20]   | 528 [±7]       | 4985 [±20] | 17790 [±38]  |
| 2030       | 1007 [±9]  | 5447 [±22]   | 564 [±7]       | 5368 [±22] | 18386 [±40]  |

**Table A152. Prevalence cases avoided in year [per 100000] for Moldova**

| Year       | Cancers   | CHD & Stroke | Diabetes  | Hypertension | Osteoarthritis |
|------------|-----------|--------------|-----------|--------------|----------------|
| Scenario 1 |           |              |           |              |                |
| 2010       | 2 [±11]   | -2 [±27]     | -20 [±27] | -1 [±51]     | -2 [±9]        |
| 2020       | 6 [±13]   | 54 [±29]     | 173 [±29] | 152 [±54]    | 7 [±9]         |
| 2030       | 18 [±13]  | 112 [±30]    | 332 [±31] | 355 [±55]    | 11 [±10]       |
| Scenario 2 |           |              |           |              |                |
| 2010       | -11 [±11] | -12 [±27]    | -14 [±27] | 9 [±51]      | -4 [±9]        |
| 2020       | 27 [±12]  | 258 [±29]    | 519 [±29] | 520 [±54]    | 22 [±9]        |
| 2030       | 41 [±13]  | 403 [±30]    | 940 [±31] | 970 [±55]    | 35 [±10]       |



## Romania

**Table A153. Cumulative incidence cases from year 2010 [per 100000 of population in 2010] for Romania**

| Year       | Cancers    | CHD & Stroke | Osteoarthritis | Diabetes   | Hypertension |
|------------|------------|--------------|----------------|------------|--------------|
| Scenario 0 |            |              |                |            |              |
| 2010       | 149 [+3]   | 1814 [+12]   | 16 [+1]        | 225 [+4]   | 738 [+8]     |
| 2020       | 1636 [+12] | 16871 [+38]  | 181 [+4]       | 2788 [+16] | 8843 [+28]   |
| 2030       | 3352 [+18] | 32601 [+56]  | 367 [+6]       | 5890 [+24] | 18285 [+42]  |
| Scenario 1 |            |              |                |            |              |
| 2010       | 145 [+3]   | 1794 [+12]   | 16 [+1]        | 208 [+4]   | 716 [+8]     |
| 2020       | 1644 [+12] | 16730 [+38]  | 177 [+4]       | 2576 [+15] | 8570 [+27]   |
| 2030       | 3356 [+18] | 32217 [+56]  | 357 [+6]       | 5403 [+23] | 17732 [+41]  |
| Scenario 2 |            |              |                |            |              |
| 2010       | 143 [+3]   | 1685 [+12]   | 15 [+1]        | 162 [+4]   | 653 [+7]     |
| 2020       | 1632 [+12] | 15922 [+37]  | 166 [+4]       | 2048 [+13] | 7842 [+26]   |
| 2030       | 3346 [+18] | 30755 [+54]  | 343 [+6]       | 4340 [+20] | 16372 [+39]  |

**Table A154. Cumulative incidence cases avoided from year 2010 [per 100,000 of population in 2010] Romania**

| Year       | Cancers  | CHD & Stroke | Osteoarthritis | Diabetes   | Hypertension |
|------------|----------|--------------|----------------|------------|--------------|
| Scenario 1 |          |              |                |            |              |
| 2010       | 4 [+5]   | 20 [+17]     | 0 [+2]         | 17 [+6]    | 22 [+11]     |
| 2020       | -8 [+16] | 141 [+52]    | 4 [+5]         | 212 [+21]  | 273 [+37]    |
| 2030       | -4 [+23] | 384 [+72]    | 10 [+8]        | 487 [+30]  | 553 [+54]    |
| Scenario 2 |          |              |                |            |              |
| 2010       | 6 [+5]   | 129 [+17]    | 1 [+2]         | 63 [+6]    | 85 [+11]     |
| 2020       | 4 [+16]  | 949 [+51]    | 15 [+5]        | 740 [+20]  | 1001 [+37]   |
| 2030       | 6 [+23]  | 1846 [+71]   | 24 [+8]        | 1550 [+29] | 1913 [+53]   |

**Table A155. Prevalence cases in year [per 100,000] for Romania**

| Year       | Cancers    | CHD & Stroke | Osteoarthritis | Diabetes   | Hypertension |
|------------|------------|--------------|----------------|------------|--------------|
| Scenario 0 |            |              |                |            |              |
| 2010       | 807 [+8]   | 4603 [+19]   | 347 [+5]       | 5446 [+21] | 16357 [+36]  |
| 2020       | 916 [+9]   | 4673 [+20]   | 328 [+5]       | 5222 [+21] | 17258 [+39]  |
| 2030       | 1012 [+10] | 5050 [+22]   | 351 [+6]       | 5856 [+24] | 19198 [+43]  |
| Scenario 1 |            |              |                |            |              |
| 2010       | 805 [+8]   | 4586 [+19]   | 343 [+5]       | 5439 [+21] | 16340 [+36]  |
| 2020       | 924 [+9]   | 4660 [+20]   | 321 [+5]       | 5058 [+21] | 17048 [+39]  |
| 2030       | 1012 [+10] | 4971 [+22]   | 343 [+6]       | 5512 [+23] | 18817 [+42]  |
| Scenario 2 |            |              |                |            |              |
| 2010       | 798 [+8]   | 4481 [+19]   | 343 [+5]       | 5384 [+21] | 16284 [+36]  |
| 2020       | 924 [+9]   | 4506 [+20]   | 319 [+5]       | 4702 [+20] | 16599 [+38]  |
| 2030       | 1026 [+10] | 4825 [+21]   | 343 [+6]       | 4877 [+22] | 18068 [+41]  |

**Table A156. Prevalence cases avoided in year [per 100,000] Romania**

| Year       | Cancers   | CHD & Stroke | Osteoarthritis | Diabetes  | Hypertension |
|------------|-----------|--------------|----------------|-----------|--------------|
| Scenario 1 |           |              |                |           |              |
| 2010       | 2 [+11]   | 17 [+27]     | 4 [+7]         | 7 [+30]   | 17 [+51]     |
| 2020       | -8 [+12]  | 13 [+27]     | 7 [+7]         | 164 [+29] | 210 [+52]    |
| 2030       | 0 [+13]   | 79 [+28]     | 8 [+7]         | 344 [+30] | 381 [+55]    |
| Scenario 2 |           |              |                |           |              |
| 2010       | 9 [+11]   | 122 [+27]    | 4 [+7]         | 62 [+29]  | 73 [+51]     |
| 2020       | -8 [+12]  | 167 [+27]    | 9 [+7]         | 520 [+28] | 659 [+52]    |
| 2030       | -14 [+13] | 225 [+28]    | 8 [+7]         | 979 [+29] | 1130 [+55]   |

## Russian Federation

**Table A157. Cumulative incidence cases from year 2010 [per 100000 of population in 2010] for Russian Federation**

| Year       | Cancers    | CHD & Stroke | Osteoarthritis | Diabetes   | Hypertension |
|------------|------------|--------------|----------------|------------|--------------|
| Scenario 0 |            |              |                |            |              |
| 2010       | 234 [±4]   | 843 [±8]     | 22 [±1]        | 56 [±2]    | 704 [±8]     |
| 2020       | 3042 [±17] | 10400 [±32]  | 288 [±5]       | 732 [±8]   | 8437 [±28]   |
| 2030       | 7117 [±29] | 23994 [±53]  | 685 [±9]       | 1765 [±14] | 20107 [±49]  |
| Scenario 1 |            |              |                |            |              |
| 2010       | 235 [±4]   | 839 [±8]     | 23 [±1]        | 58 [±2]    | 702 [±7]     |
| 2020       | 3015 [±17] | 10319 [±31]  | 286 [±5]       | 687 [±8]   | 8239 [±28]   |
| 2030       | 7050 [±29] | 23764 [±53]  | 682 [±9]       | 1646 [±14] | 19560 [±48]  |
| Scenario 2 |            |              |                |            |              |
| 2010       | 236 [±4]   | 847 [±8]     | 23 [±1]        | 56 [±2]    | 706 [±8]     |
| 2020       | 2906 [±17] | 9989 [±31]   | 274 [±5]       | 550 [±7]   | 7645 [±27]   |
| 2030       | 6812 [±28] | 22959 [±52]  | 650 [±9]       | 1307 [±12] | 18009 [±46]  |

**Table A158. Cumulative incidence cases avoided from year 2010 [per 100000 of population in 2010] for Russia**

| Year       | Cancers   | CHD & Stroke | Osteoarthritis | Diabetes  | Hypertension |
|------------|-----------|--------------|----------------|-----------|--------------|
| Scenario 1 |           |              |                |           |              |
| 2010       | -1 [±6]   | 4 [±12]      | -1 [±2]        | -2 [±3]   | 2 [±11]      |
| 2020       | 27 [±22]  | 81 [±41]     | 2 [±7]         | 45 [±11]  | 198 [±37]    |
| 2030       | 67 [±34]  | 230 [±62]    | 3 [±10]        | 119 [±17] | 547 [±56]    |
| Scenario 2 |           |              |                |           |              |
| 2010       | -2 [±6]   | -4 [±12]     | -1 [±2]        | 0 [±3]    | -2 [±11]     |
| 2020       | 136 [±22] | 411 [±40]    | 14 [±7]        | 182 [±10] | 792 [±36]    |
| 2030       | 305 [±33] | 1035 [±61]   | 35 [±10]       | 458 [±16] | 2098 [±55]   |

**Table A159. Prevalence cases in year [per 100000] for Russian Federation**

| Year       | Cancers    | CHD & Stroke | Osteoarthritis | Diabetes   | Hypertension |
|------------|------------|--------------|----------------|------------|--------------|
| Scenario 0 |            |              |                |            |              |
| 2010       | 1313 [±10] | 4014 [±18]   | 319 [±5]       | 1234 [±10] | 17518 [±37]  |
| 2020       | 1785 [±13] | 5544 [±23]   | 350 [±6]       | 1510 [±12] | 20711 [±44]  |
| 2030       | 2208 [±16] | 7034 [±29]   | 430 [±7]       | 1911 [±15] | 24987 [±54]  |
| Scenario 1 |            |              |                |            |              |
| 2010       | 1310 [±10] | 4017 [±18]   | 323 [±5]       | 1237 [±10] | 17527 [±37]  |
| 2020       | 1771 [±13] | 5521 [±23]   | 350 [±6]       | 1474 [±12] | 20566 [±44]  |
| 2030       | 2197 [±16] | 6972 [±29]   | 432 [±7]       | 1817 [±15] | 24579 [±54]  |
| Scenario 2 |            |              |                |            |              |
| 2010       | 1308 [±10] | 4002 [±18]   | 320 [±5]       | 1233 [±10] | 17552 [±37]  |
| 2020       | 1732 [±13] | 5363 [±23]   | 338 [±6]       | 1351 [±11] | 20106 [±44]  |
| 2030       | 2147 [±16] | 6722 [±28]   | 416 [±7]       | 1553 [±14] | 23524 [±53]  |

**Table A160. Prevalence cases avoided in year [per 100000] for Russia**

| Year       | Cancers   | CHD & Stroke | Osteoarthritis | Diabetes  | Hypertension |
|------------|-----------|--------------|----------------|-----------|--------------|
| Scenario 1 |           |              |                |           |              |
| 2010       | 4 [±59]   | -4 [±23]     | -4 [±7]        | 5 [±10]   | -3 [±47]     |
| 2020       | 111 [±58] | 9 [±24]      | -3 [±6]        | 25 [±12]  | 147 [±51]    |
| 2030       | 153 [±60] | 14 [±24]     | 4 [±5]         | 68 [±13]  | 348 [±55]    |
| Scenario 2 |           |              |                |           |              |
| 2010       | 21 [±59]  | 10 [±23]     | 0 [±7]         | 5 [±10]   | 6 [±47]      |
| 2020       | 523 [±58] | 41 [±23]     | 3 [±6]         | 95 [±11]  | 485 [±51]    |
| 2030       | 624 [±59] | 62 [±24]     | 13 [±5]        | 201 [±12] | 1195 [±55]   |

## San Marino

**Table A161. Cumulative incidence cases from year 2010 [per 100000 of population in 2010] for San Marino**

| Year       | Cancers    | CHD & Stroke | Osteoarthritis | Diabetes   | Hypertension |
|------------|------------|--------------|----------------|------------|--------------|
| Scenario 0 |            |              |                |            |              |
| 2010       | 241 [±4]   | 2104 [±13]   | 14 [±1]        | 229 [±4]   | 659 [±7]     |
| 2020       | 2921 [±17] | 17245 [±42]  | 192 [±4]       | 2843 [±17] | 7904 [±28]   |
| 2030       | 5726 [±25] | 28951 [±57]  | 387 [±7]       | 5673 [±25] | 15689 [±42]  |
| Scenario 1 |            |              |                |            |              |
| 2010       | 242 [±4]   | 2095 [±13]   | 15 [±1]        | 225 [±4]   | 662 [±7]     |
| 2020       | 2897 [±17] | 17077 [±42]  | 191 [±4]       | 2846 [±17] | 7694 [±28]   |
| 2030       | 5659 [±25] | 28640 [±56]  | 382 [±7]       | 5672 [±25] | 15224 [±41]  |
| Scenario 2 |            |              |                |            |              |
| 2010       | 238 [±4]   | 2087 [±13]   | 15 [±1]        | 229 [±4]   | 659 [±7]     |
| 2020       | 2792 [±17] | 16509 [±41]  | 180 [±4]       | 2850 [±17] | 7108 [±27]   |
| 2030       | 5461 [±25] | 27686 [±55]  | 355 [±6]       | 5668 [±25] | 13966 [±39]  |

**Table A162. Cumulative incidence cases avoided from year 2010 [per 100000 of population in 2010] for San Marino**

| Year       | Cancers   | CHD & Stroke | Osteoarthritis | Diabetes | Hypertension |
|------------|-----------|--------------|----------------|----------|--------------|
| Scenario 1 |           |              |                |          |              |
| 2010       | -1 [±6]   | 9 [±18]      | -1 [±2]        | 4 [±6]   | -3 [±10]     |
| 2020       | 24 [±22]  | 168 [±52]    | 1 [±6]         | -3 [±21] | 210 [±35]    |
| 2030       | 67 [±30]  | 311 [±68]    | 5 [±8]         | 1 [±30]  | 465 [±50]    |
| Scenario 2 |           |              |                |          |              |
| 2010       | 3 [±6]    | 17 [±18]     | -1 [±2]        | 0 [±6]   | 0 [±10]      |
| 2020       | 129 [±21] | 736 [±52]    | 12 [±5]        | -7 [±21] | 796 [±35]    |
| 2030       | 265 [±30] | 1265 [±67]   | 32 [±8]        | 5 [±30]  | 1723 [±49]   |

**Table A163. Prevalence cases in year [per 100000] for San Marino**

| Year       | Cancers    | CHD & Stroke | Osteoarthritis | Diabetes   | Hypertension |
|------------|------------|--------------|----------------|------------|--------------|
| Scenario 0 |            |              |                |            |              |
| 2010       | 2798 [±15] | 4968 [±20]   | 604 [±7]       | 8512 [±26] | 22430 [±42]  |
| 2020       | 2704 [±17] | 3812 [±20]   | 437 [±7]       | 6845 [±26] | 18625 [±44]  |
| 2030       | 2733 [±17] | 3519 [±20]   | 427 [±7]       | 6798 [±27] | 18722 [±46]  |
| Scenario 1 |            |              |                |            |              |
| 2010       | 2792 [±15] | 4955 [±20]   | 598 [±7]       | 8491 [±26] | 22446 [±42]  |
| 2020       | 2697 [±17] | 3773 [±20]   | 436 [±7]       | 6852 [±26] | 18483 [±43]  |
| 2030       | 2724 [±17] | 3491 [±20]   | 427 [±7]       | 6816 [±28] | 18406 [±45]  |
| Scenario 2 |            |              |                |            |              |
| 2010       | 2783 [±15] | 4948 [±20]   | 597 [±7]       | 8503 [±26] | 22416 [±42]  |
| 2020       | 2648 [±16] | 3678 [±19]   | 429 [±7]       | 6904 [±26] | 18103 [±43]  |
| 2030       | 2671 [±17] | 3402 [±19]   | 411 [±7]       | 6892 [±28] | 17587 [±44]  |

**Table A164. Prevalence cases avoided in year [per 100000] for San Marino**

| Year       | Cancers  | CHD & Stroke | Osteoarthritis | Diabetes  | Hypertension |
|------------|----------|--------------|----------------|-----------|--------------|
| Scenario 1 |          |              |                |           |              |
| 2010       | 6 [±21]  | 13 [±28]     | 6 [±10]        | 21 [±37]  | -16 [±60]    |
| 2020       | 7 [±21]  | 39 [±25]     | 1 [±8]         | -7 [±33]  | 142 [±54]    |
| 2030       | 9 [±21]  | 28 [±24]     | 0 [±8]         | -18 [±33] | 316 [±54]    |
| Scenario 2 |          |              |                |           |              |
| 2010       | 15 [±21] | 20 [±28]     | 7 [±10]        | 9 [±37]   | 14 [±60]     |
| 2020       | 56 [±21] | 134 [±24]    | 8 [±8]         | -59 [±33] | 522 [±54]    |
| 2030       | 62 [±21] | 117 [±24]    | 16 [±8]        | -94 [±33] | 1135 [±54]   |

## Serbia

**Table A165. Cumulative incidence cases from year 2010 [per 100000 of population in 2010] for Serbia**

| Year       | Cancers           | CHD & Stroke       | Osteoarthritis  | Diabetes          | Hypertension       |
|------------|-------------------|--------------------|-----------------|-------------------|--------------------|
| Scenario 0 |                   |                    |                 |                   |                    |
| 2010       | 133 [ $\pm 3$ ]   | 1183 [ $\pm 10$ ]  | 20 [ $\pm 1$ ]  | 197 [ $\pm 4$ ]   | 685 [ $\pm 7$ ]    |
| 2020       | 1510 [ $\pm 11$ ] | 11709 [ $\pm 31$ ] | 219 [ $\pm 4$ ] | 2274 [ $\pm 14$ ] | 8107 [ $\pm 26$ ]  |
| 2030       | 3009 [ $\pm 16$ ] | 22511 [ $\pm 45$ ] | 438 [ $\pm 6$ ] | 4657 [ $\pm 20$ ] | 16498 [ $\pm 38$ ] |
| Scenario 1 |                   |                    |                 |                   |                    |
| 2010       | 133 [ $\pm 3$ ]   | 1148 [ $\pm 10$ ]  | 19 [ $\pm 1$ ]  | 180 [ $\pm 4$ ]   | 668 [ $\pm 7$ ]    |
| 2020       | 1486 [ $\pm 11$ ] | 11481 [ $\pm 31$ ] | 220 [ $\pm 4$ ] | 2109 [ $\pm 13$ ] | 7831 [ $\pm 26$ ]  |
| 2030       | 2977 [ $\pm 16$ ] | 22100 [ $\pm 44$ ] | 439 [ $\pm 6$ ] | 4357 [ $\pm 20$ ] | 16001 [ $\pm 38$ ] |
| Scenario 2 |                   |                    |                 |                   |                    |
| 2010       | 129 [ $\pm 3$ ]   | 1085 [ $\pm 9$ ]   | 17 [ $\pm 1$ ]  | 141 [ $\pm 3$ ]   | 600 [ $\pm 7$ ]    |
| 2020       | 1438 [ $\pm 11$ ] | 10847 [ $\pm 30$ ] | 205 [ $\pm 4$ ] | 1678 [ $\pm 12$ ] | 7122 [ $\pm 25$ ]  |
| 2030       | 2884 [ $\pm 16$ ] | 20946 [ $\pm 43$ ] | 411 [ $\pm 6$ ] | 3553 [ $\pm 18$ ] | 14636 [ $\pm 36$ ] |

**Table A166. Cumulative incidence cases avoided from year 2010 [per 100000 of population in 2010] for Serbia**

| Year       | Cancers          | CHD & Stroke      | Osteoarthritis | Diabetes          | Hypertension      |
|------------|------------------|-------------------|----------------|-------------------|-------------------|
| Scenario 1 |                  |                   |                |                   |                   |
| 2010       | 0 [ $\pm 5$ ]    | 35 [ $\pm 14$ ]   | 1 [ $\pm 2$ ]  | 17 [ $\pm 5$ ]    | 17 [ $\pm 10$ ]   |
| 2020       | 24 [ $\pm 15$ ]  | 228 [ $\pm 43$ ]  | -1 [ $\pm 6$ ] | 165 [ $\pm 19$ ]  | 276 [ $\pm 36$ ]  |
| 2030       | 32 [ $\pm 22$ ]  | 411 [ $\pm 60$ ]  | -1 [ $\pm 8$ ] | 300 [ $\pm 27$ ]  | 497 [ $\pm 51$ ]  |
| Scenario 2 |                  |                   |                |                   |                   |
| 2010       | 4 [ $\pm 5$ ]    | 98 [ $\pm 13$ ]   | 3 [ $\pm 2$ ]  | 56 [ $\pm 5$ ]    | 85 [ $\pm 10$ ]   |
| 2020       | 72 [ $\pm 15$ ]  | 862 [ $\pm 42$ ]  | 14 [ $\pm 6$ ] | 596 [ $\pm 18$ ]  | 985 [ $\pm 35$ ]  |
| 2030       | 125 [ $\pm 22$ ] | 1565 [ $\pm 59$ ] | 27 [ $\pm 8$ ] | 1104 [ $\pm 26$ ] | 1862 [ $\pm 50$ ] |

**Table A167. Prevalence cases in year [per 100000] for Serbia**

| Year       | Cancers  | CHD & Stroke | Osteoarthritis | Diabetes   | Hypertension |
|------------|----------|--------------|----------------|------------|--------------|
| Scenario 0 |          |              |                |            |              |
| 2010       | 826 [±8] | 3258 [±16]   | 383 [±6]       | 2703 [±15] | 15734 [±35]  |
| 2020       | 922 [±9] | 3525 [±17]   | 360 [±6]       | 2304 [±14] | 16206 [±37]  |
| 2030       | 998 [±9] | 3748 [±18]   | 377 [±6]       | 2462 [±15] | 17467 [±40]  |
| Scenario 1 |          |              |                |            |              |
| 2010       | 828 [±8] | 3217 [±16]   | 385 [±6]       | 2690 [±15] | 15718 [±35]  |
| 2020       | 915 [±9] | 3493 [±17]   | 362 [±6]       | 2215 [±14] | 16023 [±37]  |
| 2030       | 986 [±9] | 3695 [±18]   | 378 [±6]       | 2342 [±14] | 17152 [±39]  |
| Scenario 2 |          |              |                |            |              |
| 2010       | 822 [±8] | 3153 [±16]   | 382 [±6]       | 2645 [±15] | 15637 [±35]  |
| 2020       | 891 [±9] | 3353 [±17]   | 353 [±5]       | 1976 [±13] | 15528 [±36]  |
| 2030       | 970 [±9] | 3564 [±18]   | 369 [±6]       | 2016 [±13] | 16295 [±38]  |

**Table A168. Prevalence cases avoided in year [per 100000] for Serbia**

| Year       | Cancers  | CHD & Stroke | Osteoarthritis | Diabetes  | Hypertension |
|------------|----------|--------------|----------------|-----------|--------------|
| Scenario 1 |          |              |                |           |              |
| 2010       | -2 [±12] | 41 [±23]     | -2 [±8]        | 13 [±21]  | 16 [±50]     |
| 2020       | 7 [±12]  | 32 [±24]     | -2 [±8]        | 89 [±19]  | 183 [±51]    |
| 2030       | 12 [±13] | 53 [±24]     | -1 [±8]        | 120 [±20] | 315 [±53]    |
| Scenario 2 |          |              |                |           |              |
| 2010       | 4 [±11]  | 105 [±23]    | 1 [±8]         | 58 [±21]  | 97 [±50]     |
| 2020       | 31 [±12] | 172 [±23]    | 7 [±8]         | 328 [±19] | 678 [±50]    |
| 2030       | 28 [±13] | 184 [±24]    | 8 [±8]         | 446 [±19] | 1172 [±52]   |



## Slovakia

**Table A169. Cumulative incidence cases from year 2010 [per 100000 of population in 2010] for Slovakia**

| Year       | Cancers    | CHD & Stroke | Osteoarthritis | Diabetes    | Hypertension |
|------------|------------|--------------|----------------|-------------|--------------|
| Scenario 0 |            |              |                |             |              |
| 2010       | 178 [±4]   | 1431 [±11]   | 16 [±1]        | 525 [±6]    | 708 [±8]     |
| 2020       | 2247 [±15] | 15302 [±38]  | 196 [±4]       | 6866 [±26]  | 9193 [±30]   |
| 2030       | 5156 [±25] | 33631 [±63]  | 456 [±7]       | 16371 [±44] | 21156 [±50]  |
| Scenario 1 |            |              |                |             |              |
| 2010       | 177 [±4]   | 1433 [±11]   | 16 [±1]        | 522 [±6]    | 710 [±8]     |
| 2020       | 2218 [±15] | 14950 [±38]  | 194 [±4]       | 6425 [±25]  | 8986 [±29]   |
| 2030       | 5078 [±24] | 32704 [±62]  | 444 [±7]       | 15274 [±42] | 20715 [±49]  |
| Scenario 2 |            |              |                |             |              |
| 2010       | 176 [±4]   | 1428 [±11]   | 16 [±1]        | 521 [±6]    | 703 [±8]     |
| 2020       | 2157 [±14] | 14068 [±36]  | 182 [±4]       | 5479 [±23]  | 8626 [±29]   |
| 2030       | 4911 [±24] | 30577 [±59]  | 419 [±7]       | 13002 [±39] | 19837 [±48]  |

**Table A170. Cumulative incidence cases avoided from year 2010 [per 100000 of population in 2010] Slovakia**

| Year       | Cancers   | CHD & Stroke | Osteoarthritis | Diabetes   | Hypertension |
|------------|-----------|--------------|----------------|------------|--------------|
| Scenario 1 |           |              |                |            |              |
| 2010       | 1 [±5]    | -2 [±15]     | 0 [±2]         | 3 [±9]     | -2 [±11]     |
| 2020       | 29 [±19]  | 352 [±49]    | 2 [±6]         | 441 [±33]  | 207 [±38]    |
| 2030       | 78 [±29]  | 927 [±73]    | 12 [±8]        | 1097 [±50] | 441 [±58]    |
| Scenario 2 |           |              |                |            |              |
| 2010       | 2 [±5]    | 3 [±15]      | 0 [±2]         | 4 [±9]     | 5 [±11]      |
| 2020       | 90 [±19]  | 1234 [±48]   | 14 [±5]        | 1387 [±31] | 567 [±38]    |
| 2030       | 245 [±28] | 3054 [±72]   | 37 [±8]        | 3369 [±48] | 1319 [±57]   |

**Table 171. Prevalence cases in year [per 100000] for Slovakia**

| Year       | Cancers    | CHD & Stroke | Osteoarthritis | Diabetes    | Hypertension |
|------------|------------|--------------|----------------|-------------|--------------|
| Scenario 0 |            |              |                |             |              |
| 2010       | 1175 [±10] | 2392 [±14]   | 351 [±5]       | 9343 [±27]  | 15583 [±35]  |
| 2020       | 1502 [±12] | 3076 [±17]   | 380 [±6]       | 8997 [±29]  | 17970 [±41]  |
| 2030       | 1811 [±15] | 3657 [±21]   | 469 [±7]       | 10870 [±36] | 22046 [±51]  |
| Scenario 1 |            |              |                |             |              |
| 2010       | 1173 [±10] | 2392 [±14]   | 351 [±5]       | 9329 [±27]  | 15567 [±35]  |
| 2020       | 1484 [±12] | 3013 [±17]   | 380 [±6]       | 8715 [±29]  | 17859 [±41]  |
| 2030       | 1791 [±14] | 3553 [±20]   | 462 [±7]       | 10314 [±35] | 21904 [±50]  |
| Scenario 2 |            |              |                |             |              |
| 2010       | 1176 [±10] | 2393 [±14]   | 347 [±5]       | 9327 [±27]  | 15554 [±35]  |
| 2020       | 1469 [±12] | 2866 [±16]   | 374 [±6]       | 8209 [±28]  | 17754 [±41]  |
| 2030       | 1751 [±14] | 3386 [±20]   | 452 [±7]       | 9338 [±33]  | 21688 [±50]  |

**Table A172. Prevalence cases avoided in year [per 100000] Slovakia**

| Year       | Cancers  | CHD & Stroke | Osteoarthritis | Diabetes   | Hypertension |
|------------|----------|--------------|----------------|------------|--------------|
| Scenario 1 |          |              |                |            |              |
| 2010       | 2 [±14]  | 0 [±20]      | 0 [±7]         | 14 [±39]   | 16 [±50]     |
| 2020       | 18 [±15] | 63 [±22]     | 0 [±8]         | 282 [±38]  | 111 [±54]    |
| 2030       | 20 [±17] | 104 [±24]    | 7 [±9]         | 556 [±41]  | 142 [±59]    |
| Scenario 2 |          |              |                |            |              |
| 2010       | -1 [±14] | -1 [±20]     | 4 [±7]         | 16 [±39]   | 29 [±50]     |
| 2020       | 33 [±15] | 210 [±22]    | 6 [±8]         | 788 [±37]  | 216 [±53]    |
| 2030       | 60 [±17] | 271 [±24]    | 17 [±9]        | 1532 [±40] | 358 [±59]    |

## Slovenia

**Table A173. Cumulative incidence cases in year 2010 [per 100,000 of population in 2010] for Slovenia**

| Year       | Cancers    | CHD & Stroke | Osteoarthritis | Diabetes   | Hypertension |
|------------|------------|--------------|----------------|------------|--------------|
| Scenario 0 |            |              |                |            |              |
| 2010       | 192 [+4]   | 1013 [+9]    | 18 [+1]        | 248 [+4]   | 729 [+8]     |
| 2020       | 2239 [+14] | 10422 [+30]  | 209 [+4]       | 2742 [+15] | 8183 [+26]   |
| 2030       | 4602 [+21] | 20833 [+44]  | 420 [+6]       | 5444 [+22] | 16306 [+39]  |
| Scenario 1 |            |              |                |            |              |
| 2010       | 194 [+4]   | 993 [+9]     | 18 [+1]        | 232 [+4]   | 703 [+8]     |
| 2020       | 2213 [+14] | 10261 [+29]  | 204 [+4]       | 2560 [+15] | 7953 [+26]   |
| 2030       | 4562 [+20] | 20507 [+43]  | 414 [+6]       | 5064 [+22] | 15870 [+38]  |
| Scenario 2 |            |              |                |            |              |
| 2010       | 188 [+4]   | 939 [+9]     | 17 [+1]        | 183 [+4]   | 632 [+7]     |
| 2020       | 2171 [+14] | 9806 [+29]   | 191 [+4]       | 2054 [+13] | 7286 [+25]   |
| 2030       | 4485 [+20] | 19557 [+42]  | 386 [+6]       | 4104 [+19] | 14574 [+36]  |

**Table A174. Cumulative incidence cases avoided in year [per 100,000 of population in 2010] Slovenia**

| Year       | Cancers   | CHD & Stroke | Osteoarthritis | Diabetes   | Hypertension |
|------------|-----------|--------------|----------------|------------|--------------|
| Scenario 1 |           |              |                |            |              |
| 2010       | -2 [+6]   | 20 [+13]     | 0 [+2]         | 16 [+6]    | 26 [+11]     |
| 2020       | 26 [+19]  | 161 [+41]    | 5 [+6]         | 182 [+21]  | 230 [+36]    |
| 2030       | 40 [+27]  | 326 [+58]    | 6 [+8]         | 380 [+29]  | 436 [+51]    |
| Scenario 2 |           |              |                |            |              |
| 2010       | 4 [+6]    | 74 [+12]     | 1 [+2]         | 65 [+6]    | 97 [+10]     |
| 2020       | 68 [+19]  | 616 [+40]    | 18 [+6]        | 688 [+20]  | 897 [+35]    |
| 2030       | 117 [+27] | 1276 [+57]   | 34 [+8]        | 1340 [+28] | 1732 [+50]   |

**Table A175. Prevalence cases in year [per 100,000] for Slovenia**

| Year       | Cancers    | CHD & Stroke | Osteoarthritis | Diabetes   | Hypertension |
|------------|------------|--------------|----------------|------------|--------------|
| Scenario 0 |            |              |                |            |              |
| 2010       | 1407 [+11] | 2454 [+14]   | 385 [+6]       | 7051 [+24] | 17563 [+37]  |
| 2020       | 1585 [+12] | 2907 [+16]   | 383 [+6]       | 6826 [+24] | 18482 [+40]  |
| 2030       | 1743 [+13] | 3217 [+17]   | 406 [+6]       | 6983 [+25] | 19508 [+42]  |
| Scenario 1 |            |              |                |            |              |
| 2010       | 1408 [+11] | 2431 [+14]   | 390 [+6]       | 7024 [+24] | 17561 [+37]  |
| 2020       | 1578 [+12] | 2886 [+16]   | 386 [+6]       | 6672 [+24] | 18338 [+39]  |
| 2030       | 1742 [+13] | 3182 [+17]   | 408 [+6]       | 6705 [+25] | 19221 [+42]  |
| Scenario 2 |            |              |                |            |              |
| 2010       | 1400 [+11] | 2374 [+14]   | 389 [+6]       | 6978 [+24] | 17480 [+37]  |
| 2020       | 1556 [+11] | 2792 [+15]   | 377 [+6]       | 6286 [+23] | 17835 [+39]  |
| 2030       | 1719 [+13] | 3041 [+17]   | 391 [+6]       | 6052 [+23] | 18381 [+41]  |

**Table A176. Prevalence cases avoided in year [per 100,000] Slovenia**

| Year       | Cancers  | CHD & Stroke | Osteoarthritis | Diabetes  | Hypertension |
|------------|----------|--------------|----------------|-----------|--------------|
| Scenario 1 |          |              |                |           |              |
| 2010       | -1 [+15] | 23 [+20]     | -5 [+8]        | 27 [+34]  | 2 [+53]      |
| 2020       | 7 [+16]  | 21 [+22]     | -3 [+8]        | 154 [+33] | 144 [+54]    |
| 2030       | 1 [+17]  | 35 [+23]     | -2 [+8]        | 278 [+33] | 287 [+56]    |
| Scenario 2 |          |              |                |           |              |
| 2010       | 7 [+15]  | 80 [+20]     | -4 [+8]        | 73 [+34]  | 83 [+53]     |
| 2020       | 29 [+16] | 115 [+21]    | 6 [+8]         | 540 [+32] | 647 [+54]    |
| 2030       | 24 [+17] | 176 [+22]    | 15 [+8]        | 931 [+32] | 1127 [+55]   |

## Spain

**Table A177. Cumulative incidence cases from year 2010 [per 100000 of population in 2010] for Spain**

| Year       | Cancers    | CHD & Stroke | Diabetes   | Hypertension | Osteoarthritis |
|------------|------------|--------------|------------|--------------|----------------|
| Scenario 0 |            |              |            |              |                |
| 2010       | 180 [±4]   | 412 [±6]     | 203 [±4]   | 599 [±7]     | 17 [±1]        |
| 2020       | 2103 [±13] | 4296 [±19]   | 2503 [±14] | 6873 [±23]   | 184 [±4]       |
| 2030       | 4399 [±19] | 8737 [±27]   | 5402 [±21] | 14107 [±34]  | 374 [±6]       |
| Scenario 1 |            |              |            |              |                |
| 2010       | 180 [±4]   | 414 [±6]     | 203 [±4]   | 597 [±7]     | 16 [±1]        |
| 2020       | 2070 [±13] | 4179 [±18]   | 2338 [±14] | 6806 [±23]   | 184 [±4]       |
| 2030       | 4313 [±19] | 8483 [±27]   | 5031 [±20] | 13954 [±34]  | 370 [±6]       |
| Scenario 2 |            |              |            |              |                |
| 2010       | 180 [±4]   | 414 [±6]     | 209 [±4]   | 598 [±7]     | 16 [±1]        |
| 2020       | 2004 [±13] | 3925 [±18]   | 1957 [±13] | 6573 [±23]   | 180 [±4]       |
| 2030       | 4171 [±19] | 7934 [±26]   | 4250 [±19] | 13493 [±33]  | 364 [±5]       |

**Table A178. Cumulative incidence cases avoided from year 2010 [per 100000 of population in 2010] Spain**

| Year       | Cancers   | CHD & Stroke | Diabetes   | Hypertension | Osteoarthritis |
|------------|-----------|--------------|------------|--------------|----------------|
| Scenario 1 |           |              |            |              |                |
| 2010       | 0 [±5]    | 0 [±8]       | 0 [±6]     | 2 [±10]      | 1 [±2]         |
| 2020       | 33 [±18]  | 117 [±26]    | 165 [±20]  | 67 [±33]     | 0 [±5]         |
| 2030       | 86 [±26]  | 254 [±37]    | 371 [±29]  | 153 [±47]    | 4 [±8]         |
| Scenario 2 |           |              |            |              |                |
| 2010       | 0 [±5]    | -2 [±8]      | -6 [±6]    | 1 [±10]      | 1 [±2]         |
| 2020       | 99 [±18]  | 371 [±26]    | 546 [±19]  | 300 [±33]    | 4 [±5]         |
| 2030       | 228 [±26] | 803 [±37]    | 1152 [±28] | 614 [±47]    | 10 [±8]        |

**Table A179. Prevalence cases in year [per 100000] for Spain**

| Year       | Cancers  | CHD & Stroke | Diabetes   | Hypertension | Osteoarthritis |
|------------|----------|--------------|------------|--------------|----------------|
| Scenario 0 |          |              |            |              |                |
| 2010       | 650 [±7] | 585 [±7]     | 4383 [±19] | 14819 [±34]  | 403 [±6]       |
| 2020       | 830 [±8] | 880 [±8]     | 4389 [±19] | 15999 [±36]  | 428 [±6]       |
| 2030       | 995 [±9] | 1030 [±9]    | 5105 [±21] | 17950 [±39]  | 476 [±6]       |
| Scenario 1 |          |              |            |              |                |
| 2010       | 654 [±7] | 587 [±7]     | 4380 [±19] | 14811 [±34]  | 401 [±6]       |
| 2020       | 814 [±8] | 842 [±8]     | 4256 [±18] | 15960 [±36]  | 428 [±6]       |
| 2030       | 968 [±9] | 995 [±9]     | 4842 [±20] | 17906 [±39]  | 474 [±6]       |
| Scenario 2 |          |              |            |              |                |
| 2010       | 648 [±7] | 586 [±7]     | 4393 [±19] | 14795 [±34]  | 403 [±6]       |
| 2020       | 801 [±8] | 791 [±8]     | 3993 [±18] | 15807 [±36]  | 426 [±6]       |
| 2030       | 947 [±9] | 924 [±9]     | 4366 [±19] | 17645 [±38]  | 469 [±6]       |

**Table A180. Prevalence cases avoided in year [per 100000] Spain**

| Year       | Cancers  | CHD & Stroke | Diabetes  | Hypertension | Osteoarthritis |
|------------|----------|--------------|-----------|--------------|----------------|
| Scenario 1 |          |              |           |              |                |
| 2010       | 0 [±10]  | 0 [±10]      | 3 [±26]   | 8 [±49]      | 2 [±8]         |
| 2020       | 16 [±11] | 38 [±12]     | 133 [±26] | 39 [±51]     | 0 [±8]         |
| 2030       | 27 [±13] | 35 [±13]     | 263 [±28] | 44 [±54]     | 2 [±9]         |
| Scenario 2 |          |              |           |              |                |
| 2010       | 2 [±10]  | -1 [±10]     | -10 [±26] | 24 [±49]     | 0 [±8]         |
| 2020       | 29 [±11] | 89 [±12]     | 396 [±26] | 192 [±50]    | 2 [±8]         |
| 2030       | 48 [±12] | 106 [±13]    | 739 [±28] | 305 [±53]    | 7 [±9]         |

## Sweden

**Table A181. Cumulative incidence cases from year 2010 [per 100000 of population in 2010] for Sweden**

| Year       | Cancers    | CHD & Stroke | Osteoarthritis | Diabetes   | Hypertension |
|------------|------------|--------------|----------------|------------|--------------|
| Scenario 0 |            |              |                |            |              |
| 2010       | 190 [±4]   | 926 [±9]     | 15 [±1]        | 90 [±3]    | 687 [±7]     |
| 2020       | 2437 [±15] | 10894 [±32]  | 216 [±4]       | 1190 [±10] | 8822 [±28]   |
| 2030       | 5512 [±24] | 24901 [±52]  | 495 [±7]       | 2862 [±18] | 20527 [±47]  |
| Scenario 1 |            |              |                |            |              |
| 2010       | 195 [±4]   | 926 [±9]     | 16 [±1]        | 89 [±3]    | 682 [±7]     |
| 2020       | 2425 [±15] | 10742 [±31]  | 209 [±4]       | 1103 [±10] | 8500 [±28]   |
| 2030       | 5444 [±24] | 24514 [±51]  | 482 [±7]       | 2660 [±17] | 19779 [±46]  |
| Scenario 2 |            |              |                |            |              |
| 2010       | 188 [±4]   | 916 [±9]     | 16 [±1]        | 91 [±3]    | 692 [±7]     |
| 2020       | 2352 [±15] | 10283 [±31]  | 195 [±4]       | 934 [±9]   | 7934 [±27]   |
| 2030       | 5281 [±24] | 23450 [±50]  | 454 [±7]       | 2252 [±16] | 18423 [±44]  |

**Table A182. Cumulative incidence cases avoided from year 2010 [per 100000 of population in 2010] Sweden**

| Year       | Cancers   | CHD & Stroke | Osteoarthritis | Diabetes  | Hypertension |
|------------|-----------|--------------|----------------|-----------|--------------|
| Scenario 1 |           |              |                |           |              |
| 2010       | 0 [±6]    | 0 [±12]      | 0 [±2]         | 1 [±4]    | 5 [±10]      |
| 2020       | 12 [±20]  | 152 [±42]    | 7 [±6]         | 87 [±14]  | 322 [±37]    |
| 2030       | 68 [±30]  | 387 [±63]    | 13 [±9]        | 202 [±21] | 748 [±57]    |
| Scenario 2 |           |              |                |           |              |
| 2010       | 2 [±5]    | 10 [±12]     | 0 [±2]         | 0 [±4]    | 0 [±11]      |
| 2020       | 85 [±20]  | 611 [±41]    | 21 [±6]        | 256 [±13] | 888 [±37]    |
| 2030       | 231 [±29] | 1451 [±62]   | 41 [±9]        | 610 [±20] | 2104 [±56]   |

**Table A183. Prevalence cases in year [per 100000] for Sweden**

| Year       | Cancers    | CHD & Stroke | Osteoarthritis | Diabetes   | Hypertension |
|------------|------------|--------------|----------------|------------|--------------|
| Scenario 0 |            |              |                |            |              |
| 2010       | 2861 [±15] | 2569 [±14]   | 405 [±6]       | 1195 [±10] | 17095 [±37]  |
| 2020       | 3443 [±18] | 3741 [±18]   | 476 [±7]       | 1380 [±11] | 20889 [±44]  |
| 2030       | 4130 [±21] | 4738 [±23]   | 579 [±8]       | 1784 [±14] | 25845 [±53]  |
| Scenario 1 |            |              |                |            |              |
| 2010       | 2874 [±15] | 2571 [±14]   | 407 [±6]       | 1203 [±10] | 17095 [±37]  |
| 2020       | 3441 [±18] | 3700 [±18]   | 472 [±7]       | 1331 [±11] | 20637 [±43]  |
| 2030       | 4092 [±21] | 4658 [±22]   | 570 [±8]       | 1682 [±13] | 25299 [±52]  |
| Scenario 2 |            |              |                |            |              |
| 2010       | 2847 [±15] | 2557 [±14]   | 407 [±6]       | 1193 [±10] | 17097 [±37]  |
| 2020       | 3381 [±18] | 3560 [±18]   | 460 [±6]       | 1215 [±11] | 20202 [±43]  |
| 2030       | 4045 [±21] | 4497 [±22]   | 553 [±8]       | 1486 [±13] | 24377 [±51]  |

**Table A184. Prevalence cases avoided in year [per 100000] Sweden**

| Year       | Cancers  | CHD & Stroke | Osteoarthritis | Diabetes  | Hypertension |
|------------|----------|--------------|----------------|-----------|--------------|
| Scenario 1 |          |              |                |           |              |
| 2010       | 0 [±21]  | 02 [±20]     | 0 [±8]         | 0 [±14]   | 0 [±52]      |
| 2020       | 2 [±23]  | 41 [±24]     | 4 [±9]         | 49 [±15]  | 252 [±58]    |
| 2030       | 38 [±26] | 80 [±27]     | 9 [±10]        | 102 [±17] | 546 [±64]    |
| Scenario 2 |          |              |                |           |              |
| 2010       | 14 [±21] | 12 [±20]     | 0 [±8]         | 2 [±14]   | 0 [±52]      |
| 2020       | 62 [±23] | 181 [±24]    | 16 [±9]        | 165 [±14] | 687 [±57]    |
| 2030       | 85 [±26] | 241 [±27]    | 26 [±10]       | 298 [±16] | 1468 [±63]   |



## Switzerland

**Table A185. Cumulative incidence cases from year 2010 [per 100000 of population in 2010] for Switzerland**

| Year       | Cancers    | CHD & Stroke | Diabetes   | Hypertension | Osteoarthritis |
|------------|------------|--------------|------------|--------------|----------------|
| Scenario 0 |            |              |            |              |                |
| 2010       | 202 [±4]   | 542 [±7]     | 59 [±2]    | 628 [±7]     | 22 [±1]        |
| 2020       | 2435 [±14] | 6484 [±23]   | 679 [±7]   | 7207 [±24]   | 257 [±5]       |
| 2030       | 5023 [±21] | 13941 [±34]  | 1376 [±11] | 14429 [±35]  | 526 [±7]       |
| Scenario 1 |            |              |            |              |                |
| 2010       | 204 [±4]   | 541 [±7]     | 59 [±2]    | 629 [±7]     | 22 [±1]        |
| 2020       | 2404 [±14] | 6418 [±23]   | 627 [±7]   | 6983 [±24]   | 253 [±5]       |
| 2030       | 4953 [±20] | 13745 [±34]  | 1264 [±10] | 13997 [±34]  | 522 [±7]       |
| Scenario 2 |            |              |            |              |                |
| 2010       | 204 [±4]   | 544 [±7]     | 57 [±2]    | 628 [±7]     | 21 [±1]        |
| 2020       | 2348 [±14] | 6152 [±22]   | 519 [±6]   | 6548 [±23]   | 237 [±4]       |
| 2030       | 4819 [±20] | 13183 [±33]  | 1054 [±9]  | 13119 [±33]  | 490 [±6]       |

**Table A186. Cumulative incidence cases avoided from year 2010 [per 100000 of population in 2010] for Switzerland**

| Year       | Cancers   | CHD & Stroke | Osteoarthritis | Diabetes   | Hypertension |
|------------|-----------|--------------|----------------|------------|--------------|
| Scenario 1 |           |              |                |            |              |
| 2010       | -2 [±6]   | 1 [±9]       | 0 [±3]         | -1 [±10]   | 0 [±2]       |
| 2020       | 31 [±20]  | 66 [±32]     | 52 [±10]       | 224 [±34]  | 4 [±6]       |
| 2030       | 70 [±28]  | 196 [±47]    | 112 [±15]      | 432 [±48]  | 4 [±9]       |
| Scenario 2 |           |              |                |            |              |
| 2010       | -2 [±6]   | -2 [±9]      | 2 [±3]         | 0 [±10]    | 1 [±2]       |
| 2020       | 87 [±20]  | 332 [±32]    | 160 [±10]      | 659 [±33]  | 20 [±6]      |
| 2030       | 204 [±28] | 758 [±47]    | 322 [±14]      | 1310 [±47] | 36 [±9]      |

**Table A187. Prevalence cases in year [per 100000] for Switzerland**

| Year       | Cancers    | CHD & Stroke | Diabetes   | Hypertension | Osteoarthritis |
|------------|------------|--------------|------------|--------------|----------------|
| Scenario 0 |            |              |            |              |                |
| 2010       | 1560 [±11] | 3217 [±16]   | 1066 [±9]  | 13580 [±33]  | 520 [±6]       |
| 2020       | 1998 [±13] | 4180 [±18]   | 1422 [±11] | 16507 [±36]  | 584 [±7]       |
| 2030       | 2273 [±14] | 5088 [±21]   | 1672 [±12] | 18714 [±40]  | 661 [±7]       |
| Scenario 1 |            |              |            |              |                |
| 2010       | 1566 [±11] | 3220 [±16]   | 1064 [±9]  | 13564 [±33]  | 520 [±6]       |
| 2020       | 1977 [±13] | 4145 [±18]   | 1373 [±11] | 16299 [±36]  | 580 [±7]       |
| 2030       | 2241 [±14] | 5000 [±20]   | 1578 [±12] | 18370 [±39]  | 658 [±7]       |
| Scenario 2 |            |              |            |              |                |
| 2010       | 1567 [±11] | 3209 [±16]   | 1068 [±9]  | 13600 [±33]  | 519 [±6]       |
| 2020       | 1945 [±13] | 3975 [±18]   | 1281 [±10] | 15935 [±36]  | 568 [±7]       |
| 2030       | 2198 [±14] | 4771 [±20]   | 1419 [±11] | 17708 [±38]  | 635 [±7]       |

**Table A188. Prevalence cases avoided in year [per 100000] for Switzerland**

| Year       | Cancers  | CHD & Stroke | Osteoarthritis | Diabetes   | Hypertension |
|------------|----------|--------------|----------------|------------|--------------|
| Scenario 1 |          |              |                |            |              |
| 2010       | -6 [±16] | -3 [±23]     | 2 [±13]        | 16 [±47]   | 0 [±9]       |
| 2020       | 21 [±18] | 35 [±26]     | 49 [±15]       | 208 [±51]  | 4 [±10]      |
| 2030       | 32 [±19] | 88 [±28]     | 94 [±16]       | 344 [±54]  | 3 [±10]      |
| Scenario 2 |          |              |                |            |              |
| 2010       | -7 [±16] | 8 [±23]      | -2 [±13]       | -20 [±47]  | 1 [±9]       |
| 2020       | 53 [±18] | 205 [±26]    | 141 [±15]      | 572 [±51]  | 16 [±10]     |
| 2030       | 75 [±19] | 317 [±28]    | 253 [±16]      | 1006 [±54] | 26 [±10]     |

## Tajikistan

**Table A189. Cumulative incidence cases from year 2010 [per 100000 of population in 2010] for Tajikistan**

| Year       | Cancers  | CHD & Stroke | Osteoarthritis | Diabetes   | Hypertension |
|------------|----------|--------------|----------------|------------|--------------|
| Scenario 0 |          |              |                |            |              |
| 2010       | 47 [±2]  | 2137 [±13]   | 8 [±1]         | 615 [±7]   | 2171 [±13]   |
| 2020       | 460 [±6] | 12097 [±29]  | 81 [±2]        | 5290 [±19] | 19237 [±37]  |
| 2030       | 807 [±7] | 19104 [±34]  | 146 [±3]       | 9953 [±24] | 33320 [±44]  |
| Scenario 1 |          |              |                |            |              |
| 2010       | 46 [±2]  | 2151 [±13]   | 8 [±1]         | 621 [±7]   | 2171 [±13]   |
| 2020       | 456 [±6] | 12019 [±29]  | 81 [±2]        | 5135 [±19] | 19133 [±37]  |
| 2030       | 798 [±7] | 18922 [±33]  | 145 [±3]       | 9648 [±24] | 33078 [±44]  |
| Scenario 2 |          |              |                |            |              |
| 2010       | 43 [±2]  | 2136 [±13]   | 8 [±1]         | 620 [±7]   | 2174 [±13]   |
| 2020       | 447 [±6] | 11732 [±29]  | 79 [±2]        | 4721 [±18] | 18786 [±36]  |
| 2030       | 783 [±7] | 18457 [±33]  | 144 [±3]       | 8839 [±23] | 32583 [±44]  |

**Table A190. Prevalence cases avoided in year [per 100000] for Tajikistan**

| Year       | Cancers | CHD & Stroke | Osteoarthritis | Diabetes  | Hypertension |
|------------|---------|--------------|----------------|-----------|--------------|
| Scenario 1 |         |              |                |           |              |
| 2010       | 3 [±6]  | 1 [±30]      | 10 [±35]       | -12 [±80] | 4 [±5]       |
| 2020       | 3 [±6]  | 32 [±28]     | 124 [±35]      | 69 [±83]  | 3 [±4]       |
| 2030       | 2 [±7]  | 35 [±28]     | 201 [±37]      | 152 [±85] | 2 [±4]       |
| Scenario 2 |         |              |                |           |              |
| 2010       | 1 [±6]  | 1 [±30]      | 5 [±35]        | -19 [±80] | 4 [±5]       |
| 2020       | 2 [±6]  | 96 [±28]     | 423 [±34]      | 297 [±83] | 2 [±4]       |
| 2030       | 6 [±7]  | 125 [±28]    | 770 [±37]      | 450 [±85] | 1 [±4]       |

**Table A191. Prevalence cases in year [per 100000] for Tajikistan**

| Year       | Cancers  | CHD & Stroke | Osteoarthritis | Diabetes   | Hypertension |
|------------|----------|--------------|----------------|------------|--------------|
| Scenario 0 |          |              |                |            |              |
| 2010       | 244 [±4] | 5726 [±21]   | 141 [±3]       | 7630 [±25] | 40074 [±57]  |
| 2020       | 257 [±4] | 4814 [±18]   | 112 [±3]       | 7537 [±23] | 43011 [±55]  |
| 2030       | 271 [±4] | 4872 [±17]   | 121 [±3]       | 8724 [±23] | 45533 [±52]  |
| Scenario 1 |          |              |                |            |              |
| 2010       | 241 [±4] | 5725 [±21]   | 137 [±3]       | 7620 [±25] | 40086 [±57]  |
| 2020       | 254 [±4] | 4782 [±18]   | 109 [±3]       | 7413 [±23] | 42942 [±55]  |
| 2030       | 269 [±4] | 4837 [±17]   | 119 [±3]       | 8523 [±22] | 45381 [±52]  |
| Scenario 2 |          |              |                |            |              |
| 2010       | 243 [±4] | 5725 [±21]   | 137 [±3]       | 7625 [±25] | 40093 [±57]  |
| 2020       | 255 [±4] | 4718 [±18]   | 110 [±3]       | 7114 [±22] | 42714 [±55]  |
| 2030       | 265 [±4] | 4747 [±17]   | 120 [±3]       | 7954 [±22] | 45083 [±52]  |

**Table A192. Cumulative incidence cases avoided from year 2010 [per 100000 of population in 2010] for Tajikistan**

| Year       | Cancers  | CHD & Stroke | Osteoarthritis | Diabetes  | Hypertension |
|------------|----------|--------------|----------------|-----------|--------------|
| Scenario 1 |          |              |                |           |              |
| 2010       | 1 [±3]   | -14 [±19]    | -6 [±10]       | 0 [±19]   | 0 [±1]       |
| 2020       | 4 [±9]   | 78 [±44]     | 155 [±29]      | 104 [±55] | 0 [±4]       |
| 2030       | 9 [±11]  | 182 [±55]    | 305 [±40]      | 242 [±73] | 1 [±5]       |
| Scenario 2 |          |              |                |           |              |
| 2010       | 4 [±3]   | 1 [±18]      | -5 [±10]       | -3 [±19]  | 0 [±1]       |
| 2020       | 13 [±9]  | 365 [±44]    | 569 [±28]      | 451 [±55] | 2 [±4]       |
| 2030       | 24 [±11] | 647 [±55]    | 1114 [±39]     | 737 [±73] | 2 [±5]       |

## Turkey

**Table A193. Cumulative incidence cases from year 2010 [per 100000 of population in 2010] for Turkey**

| Year       | Cancers  | CHD & Stroke | Osteoarthritis | Diabetes   | Hypertension |
|------------|----------|--------------|----------------|------------|--------------|
| Scenario 0 |          |              |                |            |              |
| 2010       | 38 [±2]  | 2602 [±14]   | 12 [±1]        | 179 [±4]   | 1353 [±10]   |
| 2020       | 396 [±6] | 19989 [±40]  | 129 [±3]       | 2042 [±13] | 14697 [±35]  |
| 2030       | 719 [±8] | 35917 [±54]  | 237 [±4]       | 4138 [±18] | 28836 [±49]  |
| Scenario 1 |          |              |                |            |              |
| 2010       | 38 [±2]  | 2582 [±14]   | 12 [±1]        | 176 [±4]   | 1346 [±10]   |
| 2020       | 391 [±6] | 19611 [±40]  | 127 [±3]       | 1893 [±12] | 14343 [±34]  |
| 2030       | 716 [±8] | 35202 [±54]  | 235 [±4]       | 3836 [±18] | 28157 [±48]  |
| Scenario 2 |          |              |                |            |              |
| 2010       | 39 [±2]  | 2573 [±14]   | 12 [±1]        | 178 [±4]   | 1345 [±10]   |
| 2020       | 379 [±6] | 18604 [±39]  | 119 [±3]       | 1558 [±11] | 13340 [±33]  |
| 2030       | 698 [±8] | 33357 [±52]  | 222 [±4]       | 3195 [±16] | 26218 [±46]  |

**Table A194. Cumulative incidence cases avoided from year 2010 [per 100000 of population in 2010] for Turkey**

| Year       | Cancers  | CHD & Stroke | Osteoarthritis | Diabetes  | Hypertension |
|------------|----------|--------------|----------------|-----------|--------------|
| Scenario 1 |          |              |                |           |              |
| 2010       | 0 [±2]   | 20 [±20]     | 0 [±1]         | 3 [±5]    | 7 [±15]      |
| 2020       | 5 [±8]   | 378 [±56]    | 2 [±5]         | 149 [±18] | 354 [±48]    |
| 2030       | 3 [±11]  | 715 [±75]    | 2 [±6]         | 302 [±25] | 679 [±68]    |
| Scenario 2 |          |              |                |           |              |
| 2010       | -1 [±2]  | 29 [±20]     | 0 [±1]         | 1 [±5]    | 8 [±15]      |
| 2020       | 17 [±8]  | 1385 [±56]   | 10 [±4]        | 484 [±17] | 1357 [±47]   |
| 2030       | 21 [±11] | 2560 [±74]   | 15 [±6]        | 943 [±24] | 2618 [±66]   |

**Table A195. Prevalence cases in year [per 100000] for Turkey**

| Year       | Cancers  | CHD & Stroke | Osteoarthritis | Diabetes   | Hypertension |
|------------|----------|--------------|----------------|------------|--------------|
| Scenario 0 |          |              |                |            |              |
| 2010       | 221 [±4] | 3632 [±17]   | 212 [±4]       | 3060 [±16] | 28282 [±48]  |
| 2020       | 210 [±4] | 3422 [±17]   | 172 [±4]       | 1664 [±12] | 26775 [±47]  |
| 2030       | 209 [±4] | 3473 [±17]   | 167 [±4]       | 1772 [±12] | 27525 [±48]  |
| Scenario 1 |          |              |                |            |              |
| 2010       | 218 [±4] | 3608 [±17]   | 211 [±4]       | 3063 [±16] | 28250 [±48]  |
| 2020       | 211 [±4] | 3372 [±17]   | 172 [±4]       | 1604 [±11] | 26594 [±46]  |
| 2030       | 211 [±4] | 3408 [±17]   | 171 [±4]       | 1681 [±12] | 27252 [±47]  |
| Scenario 2 |          |              |                |            |              |
| 2010       | 220 [±4] | 3592 [±17]   | 213 [±4]       | 3078 [±16] | 28255 [±48]  |
| 2020       | 210 [±4] | 3227 [±16]   | 169 [±4]       | 1457 [±11] | 26139 [±46]  |
| 2030       | 210 [±4] | 3261 [±16]   | 165 [±4]       | 1498 [±11] | 26409 [±46]  |

**Table A196. Prevalence cases avoided in year [per 100000] for Turkey**

| Year       | Cancers | CHD & Stroke | Osteoarthritis | Diabetes  | Hypertension |
|------------|---------|--------------|----------------|-----------|--------------|
| Scenario 1 |         |              |                |           |              |
| 2010       | 3 [±6]  | 24 [±24]     | 1 [±6]         | -3 [±22]  | 32 [±67]     |
| 2020       | -1 [±6] | 50 [±23]     | 0 [±5]         | 60 [±16]  | 181 [±65]    |
| 2030       | -2 [±6] | 65 [±23]     | -4 [±5]        | 91 [±17]  | 273 [±66]    |
| Scenario 2 |         |              |                |           |              |
| 2010       | 1 [±6]  | 40 [±24]     | -1 [±6]        | -18 [±22] | 27 [±67]     |
| 2020       | 0 [±6]  | 195 [±23]    | 3 [±5]         | 207 [±16] | 636 [±65]    |
| 2030       | -1 [±6] | 212 [±23]    | 2 [±5]         | 274 [±16] | 1116 [±66]   |

## Turkmenistan

**Table A197. Cumulative incidence cases avoided from year 2010 [per 100000 of population in 2010] for Turkmenistan**

| Year       | Cancers         | CHD & Stroke     | Osteoarthritis | Diabetes          | Hypertension     |
|------------|-----------------|------------------|----------------|-------------------|------------------|
| Scenario 1 |                 |                  |                |                   |                  |
| 2010       | 0 [ $\pm 3$ ]   | -2 [ $\pm 16$ ]  | 0 [ $\pm 1$ ]  | 4 [ $\pm 6$ ]     | -6 [ $\pm 9$ ]   |
| 2020       | 8 [ $\pm 11$ ]  | 160 [ $\pm 45$ ] | 4 [ $\pm 4$ ]  | 163 [ $\pm 20$ ]  | 127 [ $\pm 29$ ] |
| 2030       | 16 [ $\pm 15$ ] | 301 [ $\pm 60$ ] | 4 [ $\pm 6$ ]  | 343 [ $\pm 28$ ]  | 283 [ $\pm 41$ ] |
| Scenario 2 |                 |                  |                |                   |                  |
| 2010       | -2 [ $\pm 3$ ]  | 1 [ $\pm 16$ ]   | 0 [ $\pm 1$ ]  | 1 [ $\pm 6$ ]     | -6 [ $\pm 9$ ]   |
| 2020       | 16 [ $\pm 11$ ] | 457 [ $\pm 45$ ] | 9 [ $\pm 4$ ]  | 490 [ $\pm 20$ ]  | 397 [ $\pm 29$ ] |
| 2030       | 47 [ $\pm 15$ ] | 864 [ $\pm 60$ ] | 14 [ $\pm 6$ ] | 1025 [ $\pm 27$ ] | 897 [ $\pm 41$ ] |

**Table A198. Cumulative incidence cases from year 2010 [per 100000 of population in 2010] for Turkmenistan**

| Year       | Cancers           | CHD & Stroke       | Osteoarthritis  | Diabetes          | Hypertension       |
|------------|-------------------|--------------------|-----------------|-------------------|--------------------|
| Scenario 0 |                   |                    |                 |                   |                    |
| 2010       | 66 [ $\pm 2$ ]    | 1622 [ $\pm 11$ ]  | 10 [ $\pm 1$ ]  | 229 [ $\pm 4$ ]   | 490 [ $\pm 6$ ]    |
| 2020       | 726 [ $\pm 7$ ]   | 12865 [ $\pm 31$ ] | 111 [ $\pm 3$ ] | 2626 [ $\pm 14$ ] | 5498 [ $\pm 20$ ]  |
| 2030       | 1387 [ $\pm 10$ ] | 22975 [ $\pm 40$ ] | 215 [ $\pm 4$ ] | 5203 [ $\pm 19$ ] | 10810 [ $\pm 28$ ] |
| Scenario 1 |                   |                    |                 |                   |                    |
| 2010       | 66 [ $\pm 2$ ]    | 1624 [ $\pm 11$ ]  | 10 [ $\pm 1$ ]  | 225 [ $\pm 4$ ]   | 496 [ $\pm 6$ ]    |
| 2020       | 718 [ $\pm 7$ ]   | 12705 [ $\pm 31$ ] | 107 [ $\pm 3$ ] | 2463 [ $\pm 14$ ] | 5371 [ $\pm 20$ ]  |
| 2030       | 1371 [ $\pm 10$ ] | 22674 [ $\pm 40$ ] | 211 [ $\pm 4$ ] | 4860 [ $\pm 19$ ] | 10527 [ $\pm 27$ ] |
| Scenario 2 |                   |                    |                 |                   |                    |
| 2010       | 68 [ $\pm 2$ ]    | 1621 [ $\pm 11$ ]  | 10 [ $\pm 1$ ]  | 228 [ $\pm 4$ ]   | 496 [ $\pm 6$ ]    |
| 2020       | 710 [ $\pm 7$ ]   | 12408 [ $\pm 31$ ] | 102 [ $\pm 3$ ] | 2136 [ $\pm 13$ ] | 5101 [ $\pm 20$ ]  |
| 2030       | 1340 [ $\pm 10$ ] | 22111 [ $\pm 40$ ] | 201 [ $\pm 4$ ] | 4178 [ $\pm 17$ ] | 9913 [ $\pm 26$ ]  |

**Table A199. Prevalence cases in year [per 100000] for Turkmenistan**

| Year       | Cancers  | CHD & Stroke | Osteoarthritis | Diabetes   | Hypertension |
|------------|----------|--------------|----------------|------------|--------------|
| Scenario 0 |          |              |                |            |              |
| 2010       | 252 [±4] | 4424 [±19]   | 174 [±4]       | 3807 [±17] | 11857 [±31]  |
| 2020       | 328 [±5] | 4863 [±19]   | 164 [±4]       | 4333 [±18] | 13101 [±31]  |
| 2030       | 357 [±5] | 5309 [±19]   | 182 [±4]       | 5020 [±19] | 14446 [±32]  |
| Scenario 1 |          |              |                |            |              |
| 2010       | 252 [±4] | 4419 [±19]   | 170 [±4]       | 3808 [±17] | 11868 [±31]  |
| 2020       | 324 [±5] | 4825 [±19]   | 161 [±3]       | 4210 [±18] | 13005 [±31]  |
| 2030       | 349 [±5] | 5239 [±19]   | 180 [±4]       | 4785 [±18] | 14236 [±32]  |
| Scenario 2 |          |              |                |            |              |
| 2010       | 254 [±5] | 4414 [±19]   | 176 [±4]       | 3808 [±17] | 11861 [±31]  |
| 2020       | 323 [±5] | 4751 [±19]   | 159 [±3]       | 3948 [±17] | 12770 [±31]  |
| 2030       | 344 [±5] | 5131 [±19]   | 175 [±4]       | 4313 [±17] | 13747 [±31]  |

**Table A200. Prevalence cases avoided in year [per 100000] for Turkmenistan**

| Year       | Cancers | CHD & Stroke | Osteoarthritis | Diabetes  | Hypertension |
|------------|---------|--------------|----------------|-----------|--------------|
| Scenario 1 |         |              |                |           |              |
| 2010       | 0 [±6]  | 5 [±27]      | 4 [±5]         | -1 [±25]  | -11 [±44]    |
| 2020       | 4 [±7]  | 38 [±28]     | 3 [±5]         | 123 [±26] | 96 [±46]     |
| 2030       | 8 [±8]  | 70 [±29]     | 2 [±5]         | 235 [±28] | 210 [±48]    |
| Scenario 2 |         |              |                |           |              |
| 2010       | -2 [±6] | 10 [±27]     | -2 [±5]        | -1 [±25]  | -4 [±44]     |
| 2020       | 5 [±7]  | 112 [±28]    | 5 [±5]         | 385 [±26] | 331 [±45]    |
| 2030       | 13 [±7] | 178 [±29]    | 7 [±5]         | 707 [±27] | 699 [±47]    |



## Ukraine

**Table A201. Cumulative incidence cases from year 2010 [per 100000 of population in 2010] for Ukraine**

| Year       | Cancers    | CHD & Stroke | Osteoarthritis | Diabetes   | Hypertension |
|------------|------------|--------------|----------------|------------|--------------|
| Scenario 0 |            |              |                |            |              |
| 2010       | 147 [±3]   | 1126 [±9]    | 529 [±7]       | 244 [±4]   | 824 [±8]     |
| 2020       | 1783 [±12] | 12672 [±33]  | 6748 [±24]     | 2789 [±16] | 8735 [±27]   |
| 2030       | 3899 [±20] | 27074 [±52]  | 15184 [±39]    | 5838 [±24] | 17390 [±42]  |
| Scenario 1 |            |              |                |            |              |
| 2010       | 149 [±3]   | 1127 [±9]    | 537 [±7]       | 237 [±4]   | 814 [±8]     |
| 2020       | 1773 [±12] | 12548 [±33]  | 6596 [±24]     | 2582 [±15] | 8335 [±27]   |
| 2030       | 3850 [±20] | 26792 [±51]  | 14823 [±38]    | 5427 [±23] | 16636 [±41]  |
| Scenario 2 |            |              |                |            |              |
| 2010       | 145 [±3]   | 1125 [±9]    | 535 [±7]       | 245 [±4]   | 819 [±8]     |
| 2020       | 1700 [±12] | 12299 [±33]  | 6199 [±23]     | 2172 [±14] | 7571 [±26]   |
| 2030       | 3706 [±19] | 26166 [±51]  | 13941 [±37]    | 4597 [±21] | 15195 [±39]  |

**Table A202. Cumulative incidence cases avoided from year 2010 [per 100000 of population in 2010] for Ukraine**

| Year       | Cancers   | CHD & Stroke | Osteoarthritis | Diabetes   | Hypertension |
|------------|-----------|--------------|----------------|------------|--------------|
| Scenario 1 |           |              |                |            |              |
| 2010       | -2 [±5]   | -1 [±13]     | 7 [±6]         | 10 [±11]   | -8 [±9]      |
| 2020       | 10 [±17]  | 124 [±45]    | 207 [±21]      | 400 [±37]  | 152 [±33]    |
| 2030       | 49 [±25]  | 282 [±66]    | 411 [±30]      | 754 [±52]  | 361 [±49]    |
| Scenario 2 |           |              |                |            |              |
| 2010       | 2 [±5]    | 1 [±13]      | -1 [±6]        | 5 [±11]    | -6 [±9]      |
| 2020       | 83 [±17]  | 373 [±45]    | 617 [±20]      | 1164 [±36] | 549 [±32]    |
| 2030       | 193 [±25] | 908 [±65]    | 1241 [±29]     | 2195 [±51] | 1243 [±48]   |

**Table A203. Prevalence cases in year [per 100000] for Ukraine**

| Year       | Cancers           | CHD & Stroke      | Osteoarthritis     | Diabetes          | Hypertension       |
|------------|-------------------|-------------------|--------------------|-------------------|--------------------|
| Scenario 0 |                   |                   |                    |                   |                    |
| 2010       | 736 [ $\pm 8$ ]   | 4382 [ $\pm 19$ ] | 16571 [ $\pm 36$ ] | 5822 [ $\pm 22$ ] | 29854 [ $\pm 49$ ] |
| 2020       | 967 [ $\pm 9$ ]   | 5757 [ $\pm 22$ ] | 18053 [ $\pm 40$ ] | 6619 [ $\pm 24$ ] | 32922 [ $\pm 53$ ] |
| 2030       | 1106 [ $\pm 10$ ] | 6780 [ $\pm 26$ ] | 20729 [ $\pm 45$ ] | 7355 [ $\pm 27$ ] | 35361 [ $\pm 59$ ] |
| Scenario 1 |                   |                   |                    |                   |                    |
| 2010       | 740 [ $\pm 8$ ]   | 4379 [ $\pm 19$ ] | 16573 [ $\pm 36$ ] | 5807 [ $\pm 22$ ] | 29859 [ $\pm 49$ ] |
| 2020       | 967 [ $\pm 9$ ]   | 5710 [ $\pm 22$ ] | 17942 [ $\pm 39$ ] | 6428 [ $\pm 24$ ] | 32585 [ $\pm 53$ ] |
| 2030       | 1093 [ $\pm 10$ ] | 6682 [ $\pm 26$ ] | 20495 [ $\pm 45$ ] | 7045 [ $\pm 26$ ] | 34786 [ $\pm 59$ ] |
| Scenario 2 |                   |                   |                    |                   |                    |
| 2010       | 742 [ $\pm 8$ ]   | 4383 [ $\pm 19$ ] | 16560 [ $\pm 36$ ] | 5825 [ $\pm 22$ ] | 29822 [ $\pm 49$ ] |
| 2020       | 938 [ $\pm 9$ ]   | 5598 [ $\pm 22$ ] | 17591 [ $\pm 39$ ] | 6096 [ $\pm 23$ ] | 31894 [ $\pm 52$ ] |
| 2030       | 1063 [ $\pm 10$ ] | 6479 [ $\pm 25$ ] | 19842 [ $\pm 44$ ] | 6457 [ $\pm 25$ ] | 33643 [ $\pm 58$ ] |

**Table A204. Prevalence cases avoided in year [per 100000] for Ukraine**

| Year       | Cancers         | CHD & Stroke     | Osteoarthritis   | Diabetes          | Hypertension     |
|------------|-----------------|------------------|------------------|-------------------|------------------|
| Scenario 1 |                 |                  |                  |                   |                  |
| 2010       | -4 [ $\pm 11$ ] | 3 [ $\pm 26$ ]   | 15 [ $\pm 31$ ]  | -5 [ $\pm 69$ ]   | -2 [ $\pm 51$ ]  |
| 2020       | 0 [ $\pm 12$ ]  | 47 [ $\pm 30$ ]  | 191 [ $\pm 32$ ] | 337 [ $\pm 72$ ]  | 111 [ $\pm 54$ ] |
| 2030       | 13 [ $\pm 13$ ] | 98 [ $\pm 33$ ]  | 310 [ $\pm 34$ ] | 575 [ $\pm 75$ ]  | 234 [ $\pm 57$ ] |
| Scenario 2 |                 |                  |                  |                   |                  |
| 2010       | -6 [ $\pm 11$ ] | -1 [ $\pm 26$ ]  | -3 [ $\pm 31$ ]  | 32 [ $\pm 69$ ]   | 11 [ $\pm 51$ ]  |
| 2020       | 29 [ $\pm 12$ ] | 159 [ $\pm 30$ ] | 523 [ $\pm 32$ ] | 1028 [ $\pm 72$ ] | 462 [ $\pm 53$ ] |
| 2030       | 43 [ $\pm 13$ ] | 301 [ $\pm 33$ ] | 898 [ $\pm 33$ ] | 1718 [ $\pm 74$ ] | 887 [ $\pm 57$ ] |

## United Kingdom

**Table A205. Cumulative incidence cases from year 2010 [per 100000 of population in 2010] UK**

| Year       | Cancers           | CHD & Stroke       | Osteoarthritis  | Diabetes          | Hypertension      |
|------------|-------------------|--------------------|-----------------|-------------------|-------------------|
| Scenario 0 |                   |                    |                 |                   |                   |
| 2010       | 223 [ $\pm 4$ ]   | 519 [ $\pm 6$ ]    | 17 [ $\pm 1$ ]  | 168 [ $\pm 4$ ]   | 247 [ $\pm 4$ ]   |
| 2020       | 2577 [ $\pm 14$ ] | 5938 [ $\pm 22$ ]  | 187 [ $\pm 4$ ] | 1923 [ $\pm 12$ ] | 2794 [ $\pm 15$ ] |
| 2030       | 5164 [ $\pm 20$ ] | 12164 [ $\pm 31$ ] | 370 [ $\pm 5$ ] | 3919 [ $\pm 17$ ] | 5539 [ $\pm 21$ ] |
| Scenario 1 |                   |                    |                 |                   |                   |
| 2010       | 226 [ $\pm 4$ ]   | 521 [ $\pm 6$ ]    | 17 [ $\pm 1$ ]  | 166 [ $\pm 4$ ]   | 247 [ $\pm 4$ ]   |
| 2020       | 2541 [ $\pm 14$ ] | 5869 [ $\pm 21$ ]  | 182 [ $\pm 4$ ] | 1802 [ $\pm 12$ ] | 2717 [ $\pm 15$ ] |
| 2030       | 5092 [ $\pm 20$ ] | 11960 [ $\pm 31$ ] | 360 [ $\pm 5$ ] | 3656 [ $\pm 17$ ] | 5354 [ $\pm 20$ ] |
| Scenario 2 |                   |                    |                 |                   |                   |
| 2010       | 229 [ $\pm 4$ ]   | 526 [ $\pm 6$ ]    | 17 [ $\pm 1$ ]  | 165 [ $\pm 4$ ]   | 247 [ $\pm 4$ ]   |
| 2020       | 2458 [ $\pm 14$ ] | 5589 [ $\pm 21$ ]  | 172 [ $\pm 4$ ] | 1474 [ $\pm 11$ ] | 2481 [ $\pm 14$ ] |
| 2030       | 4925 [ $\pm 20$ ] | 11348 [ $\pm 30$ ] | 339 [ $\pm 5$ ] | 3021 [ $\pm 15$ ] | 4888 [ $\pm 19$ ] |

**Table A206. Cumulative incidence cases avoided from year 2010 [per 100000 of population in 2010] United Kingdom**

| Year       | Cancers          | CHD & Stroke     | Osteoarthritis | Diabetes         | Hypertension     |
|------------|------------------|------------------|----------------|------------------|------------------|
| Scenario 1 |                  |                  |                |                  |                  |
| 2010       | 0 [ $\pm 6$ ]    | 0 [ $\pm 9$ ]    | 0 [ $\pm 2$ ]  | 2 [ $\pm 5$ ]    | 0 [ $\pm 6$ ]    |
| 2020       | 36 [ $\pm 20$ ]  | 69 [ $\pm 31$ ]  | 5 [ $\pm 5$ ]  | 121 [ $\pm 17$ ] | 77 [ $\pm 21$ ]  |
| 2030       | 72 [ $\pm 29$ ]  | 204 [ $\pm 44$ ] | 10 [ $\pm 8$ ] | 263 [ $\pm 25$ ] | 185 [ $\pm 30$ ] |
| Scenario 2 |                  |                  |                |                  |                  |
| 2010       | 0 [ $\pm 6$ ]    | 0 [ $\pm 9$ ]    | 0 [ $\pm 2$ ]  | 3 [ $\pm 5$ ]    | 0 [ $\pm 6$ ]    |
| 2020       | 119 [ $\pm 20$ ] | 349 [ $\pm 30$ ] | 15 [ $\pm 5$ ] | 449 [ $\pm 16$ ] | 313 [ $\pm 21$ ] |
| 2030       | 239 [ $\pm 28$ ] | 816 [ $\pm 43$ ] | 31 [ $\pm 8$ ] | 898 [ $\pm 24$ ] | 651 [ $\pm 29$ ] |

**Table A207. Prevalence cases in year [per 100000] UK**

| Year       | Cancers    | CHD & Stroke | Osteoarthritis | Diabetes   | Hypertension |
|------------|------------|--------------|----------------|------------|--------------|
| Scenario 0 |            |              |                |            |              |
| 2010       | 1202 [±10] | 2657 [±15]   | 381 [±6]       | 2747 [±15] | 5190 [±20]   |
| 2020       | 1478 [±11] | 3229 [±16]   | 405 [±6]       | 3372 [±16] | 5910 [±21]   |
| 2030       | 1631 [±11] | 3730 [±17]   | 434 [±6]       | 3850 [±17] | 6422 [±22]   |
| Scenario 1 |            |              |                |            |              |
| 2010       | 1203 [±10] | 2656 [±15]   | 382 [±6]       | 2754 [±15] | 5204 [±20]   |
| 2020       | 1459 [±11] | 3198 [±16]   | 402 [±6]       | 3275 [±16] | 5867 [±21]   |
| 2030       | 1621 [±11] | 3652 [±17]   | 431 [±6]       | 3656 [±17] | 6296 [±22]   |
| Scenario 2 |            |              |                |            |              |
| 2010       | 1221 [±10] | 2660 [±15]   | 386 [±6]       | 2752 [±15] | 5194 [±20]   |
| 2020       | 1431 [±11] | 3047 [±15]   | 396 [±6]       | 2999 [±15] | 5663 [±21]   |
| 2030       | 1583 [±11] | 3457 [±16]   | 419 [±6]       | 3220 [±16] | 5983 [±22]   |

**Table A208. Prevalence cases avoided in year [per 100000] United Kingdom**

| Year       | Cancers  | CHD & Stroke | Osteoarthritis | Diabetes  | Hypertension |
|------------|----------|--------------|----------------|-----------|--------------|
| Scenario 1 |          |              |                |           |              |
| 2010       | 0 [±14]  | 1 [±21]      | 0 [±8]         | 0 [±21]   | 0 [±29]      |
| 2020       | 19 [±15] | 31 [±23]     | 3 [±8]         | 97 [±23]  | 43 [±31]     |
| 2030       | 10 [±16] | 78 [±24]     | 3 [±8]         | 194 [±25] | 126 [±32]    |
| Scenario 2 |          |              |                |           |              |
| 2010       | 0 [±14]  | 0 [±21]      | 0 [±8]         | 0 [±21]   | 0 [±29]      |
| 2020       | 47 [±15] | 182 [±22]    | 9 [±8]         | 373 [±23] | 247 [±30]    |
| 2030       | 48 [±16] | 273 [±24]    | 15 [±8]        | 630 [±24] | 439 [±32]    |

## Uzbekistan

**Table A209. Cumulative incidence cases from year 2010 [per 100000 of population in 2010] for Uzbekistan**

| Year       | Cancers  | CHD & Stroke | Osteoarthritis | Diabetes   | Hypertension |
|------------|----------|--------------|----------------|------------|--------------|
| Scenario 0 |          |              |                |            |              |
| 2010       | 33 [±2]  | 1302 [±10]   | 8 [±1]         | 68 [±2]    | 239 [±4]     |
| 2020       | 345 [±5] | 10832 [±28]  | 91 [±3]        | 811 [±8]   | 2664 [±14]   |
| 2030       | 665 [±7] | 19682 [±37]  | 182 [±4]       | 1742 [±11] | 5435 [±19]   |
| Scenario 1 |          |              |                |            |              |
| 2010       | 33 [±2]  | 1308 [±10]   | 8 [±1]         | 68 [±2]    | 236 [±4]     |
| 2020       | 342 [±5] | 10721 [±28]  | 88 [±3]        | 735 [±7]   | 2533 [±14]   |
| 2030       | 658 [±7] | 19405 [±36]  | 175 [±3]       | 1568 [±10] | 5172 [±19]   |
| Scenario 2 |          |              |                |            |              |
| 2010       | 31 [±2]  | 1300 [±10]   | 8 [±1]         | 68 [±2]    | 239 [±4]     |
| 2020       | 327 [±5] | 10413 [±28]  | 83 [±2]        | 616 [±7]   | 2399 [±13]   |
| 2030       | 634 [±7] | 18838 [±36]  | 166 [±3]       | 1295 [±9]  | 4847 [±18]   |

**Table A210. Cumulative incidence cases avoided from year 2010 [per 100000 of population in 2010] for Uzbekistan**

| Year       | Cancers  | CHD & Stroke | Osteoarthritis | Hypertension | Diabetes  |
|------------|----------|--------------|----------------|--------------|-----------|
| Scenario 1 |          |              |                |              |           |
| 2010       | 0 [±2]   | -6 [±14]     | 0 [±1]         | 3 [±6]       | 0 [±3]    |
| 2020       | 3 [±7]   | 111 [±42]    | 3 [±4]         | 131 [±20]    | 76 [±11]  |
| 2030       | 7 [±10]  | 277 [±56]    | 7 [±5]         | 263 [±29]    | 174 [±16] |
| Scenario 2 |          |              |                |              |           |
| 2010       | 2 [±2]   | 2 [±14]      | 0 [±1]         | 0 [±6]       | 0 [±3]    |
| 2020       | 18 [±7]  | 419 [±41]    | 8 [±4]         | 265 [±20]    | 195 [±11] |
| 2030       | 31 [±10] | 844 [±56]    | 16 [±5]        | 588 [±29]    | 447 [±16] |

**Table A211. Prevalence cases in year [per 100000] for Uzbekistan**

| Year       | Cancers  | CHD & Stroke | Osteoarthritis | Diabetes   | Hypertension |
|------------|----------|--------------|----------------|------------|--------------|
| Scenario 0 |          |              |                |            |              |
| 2010       | 196 [±4] | 3374 [±16]   | 139 [±3]       | 1228 [±10] | 5113 [±20]   |
| 2020       | 218 [±4] | 4097 [±17]   | 136 [±3]       | 1390 [±10] | 5665 [±20]   |
| 2030       | 242 [±4] | 4654 [±18]   | 156 [±3]       | 1733 [±11] | 6565 [±21]   |
| Scenario 1 |          |              |                |            |              |
| 2010       | 197 [±4] | 3389 [±16]   | 138 [±3]       | 1223 [±10] | 5100 [±20]   |
| 2020       | 221 [±4] | 4051 [±17]   | 133 [±3]       | 1321 [±10] | 5536 [±20]   |
| 2030       | 241 [±4] | 4574 [±18]   | 153 [±3]       | 1604 [±10] | 6346 [±21]   |
| Scenario 2 |          |              |                |            |              |
| 2010       | 196 [±4] | 3384 [±16]   | 140 [±3]       | 1228 [±10] | 5094 [±20]   |
| 2020       | 215 [±4] | 3951 [±17]   | 131 [±3]       | 1226 [±10] | 5427 [±20]   |
| 2030       | 235 [±4] | 4443 [±17]   | 147 [±3]       | 1398 [±10] | 6109 [±20]   |

**Table A212. Prevalence cases avoided in year [per 100000] for Uzbekistan**

| Year       | Cancers | CHD & Stroke | Osteoarthritis | Diabetes  | Hypertension |
|------------|---------|--------------|----------------|-----------|--------------|
| Scenario 1 |         |              |                |           |              |
| 2010       | -1 [±6] | -15 [±23]    | 1 [±5]         | 5 [±14]   | 13 [±29]     |
| 2020       | -3 [±6] | 46 [±26]     | 3 [±5]         | 69 [±15]  | 129 [±30]    |
| 2030       | 1 [±6]  | 80 [±27]     | 3 [±5]         | 129 [±16] | 219 [±32]    |
| Scenario 2 |         |              |                |           |              |
| 2010       | 0 [±6]  | -10 [±23]    | -1 [±5]        | 0 [±14]   | 19 [±29]     |
| 2020       | 3 [±6]  | 146 [±25]    | 5 [±5]         | 164 [±14] | 238 [±30]    |
| 2030       | 7 [±6]  | 211 [±27]    | 9 [±5]         | 335 [±16] | 456 [±32]    |
